# Supplementary material for: Data-driven intelligent productivity prediction model for horizontal fracture stimulation
Source: Frontiers journal article supplement (doi:10.3389/feart.2025.1601363), 2025-08-01
Supplement: Table_2.xlsx [file Table_2.xlsx]

## Sheet: Sheet2 (2)
Post-fracture duration(mon)	present fomraiton pressure(MPa)	well spacing(m)	Sandstone thickness(m)	Effective thickness(m)	Porosity(%)	permeability(μm)	quantity of sand added(m^3)	Number of fracture slits (slits)	pre-fracture water content(%)	Production capacity splitting factor(1)	Daily oil increase(t)
1	7.99	175	3.5	1.3	46	0.139	47	2	0	0.275583	0.570458
2	7.99	175	3.5	1.3	46	0.139	47	2	0	0.275583	0.846041
3	7.99	175	3.5	1.3	46	0.139	47	2	0	0.275583	1.69208
1	9.89	250	5.5	3.4	30.5	0.498	38	2	0	0.370034	1.38393
2	9.89	250	5.5	3.4	30.5	0.498	38	2	0	0.370034	1.53564
3	9.89	250	5.5	3.4	30.5	0.498	38	2	0	0.370034	1.52084
4	9.89	250	5.5	3.4	30.5	0.498	38	2	0	0.370034	1.79836
5	9.89	250	5.5	3.4	30.5	0.498	38	2	0	0.370034	1.28032
6	9.89	250	5.5	3.4	30.5	0.498	38	2	0	0.370034	1.1471
1	9.89	250	3.6	1.8	28.4	0.335	45	2	0	0.13178	0.492858
2	9.89	250	3.6	1.8	28.4	0.335	45	2	0	0.13178	0.546888
3	9.89	250	3.6	1.8	28.4	0.335	45	2	0	0.13178	0.541617
4	9.89	250	3.6	1.8	28.4	0.335	45	2	0	0.13178	0.640452
5	9.89	250	3.6	1.8	28.4	0.335	45	2	0	0.13178	0.45596
6	9.89	250	3.6	1.8	28.4	0.335	45	2	0	0.13178	0.408519
1	10.96	175	4.5	2.1	28.8	0.316	27	2	95.8469	0.286578	0.739371
2	10.96	175	4.5	2.1	28.8	0.316	27	2	95.8469	0.286578	0.621874
3	10.96	175	4.5	2.1	28.8	0.316	27	2	95.8469	0.286578	0.507243
4	10.96	175	4.5	2.1	28.8	0.316	27	2	95.8469	0.286578	0.269383
5	10.96	175	4.5	2.1	28.8	0.316	27	2	95.8469	0.286578	0.736505
6	10.96	175	4.5	2.1	28.8	0.316	27	2	95.8469	0.286578	0.980097
1	9.53	175	8.8	2.1	26.7	0.216	27	2	94.6593	0.507439	0.471919
2	9.53	175	8.8	2.1	26.7	0.216	27	2	94.6593	0.507439	0.908316
3	9.53	175	8.8	2.1	26.7	0.216	27	2	94.6593	0.507439	1.00473
4	9.53	175	8.8	2.1	26.7	0.216	27	2	94.6593	0.507439	0.969209
5	9.53	175	8.8	2.1	26.7	0.216	27	2	94.6593	0.507439	1.0301
6	9.53	175	8.8	2.1	26.7	0.216	27	2	94.6593	0.507439	1.28382
1	9.53	175	6	1.1	26.3	0.201	27	2	94.6593	0.247343	0.230029
2	9.53	175	6	1.1	26.3	0.201	27	2	94.6593	0.247343	0.442744
3	9.53	175	6	1.1	26.3	0.201	27	2	94.6593	0.247343	0.489739
4	9.53	175	6	1.1	26.3	0.201	27	2	94.6593	0.247343	0.472425
5	9.53	175	6	1.1	26.3	0.201	27	2	94.6593	0.247343	0.502106
6	9.53	175	6	1.1	26.3	0.201	27	2	94.6593	0.247343	0.625778
1	9.44	175	0.6	0.4	35	0.062	25	2	80.9709	0.212511	0.535527
1	10.21	175	3.5	2.4	38	0.415	52	2	96.565	0.76698	1.37289
1	10.21	175	1.1	0.3	37	0.168	42	2	96.565	0.038811	0.0694717
1	10.24	175	5.9	0.7	25.1	0.064	27	2	97.63	0.0806771	0.0588943
2	10.24	175	5.9	0.7	25.1	0.064	27	2	97.63	0.0806771	0.0548604
3	10.24	175	5.9	0.7	25.1	0.064	27	2	97.63	0.0806771	0.0621214
4	10.24	175	5.9	0.7	25.1	0.064	27	2	97.63	0.0806771	0.0597011
5	10.24	175	5.9	0.7	25.1	0.064	27	2	97.63	0.0806771	0.095199
6	10.24	175	5.9	0.7	25.1	0.064	27	2	97.63	0.0806771	0.0984261
1	9.18	175	3.6	1.6	26.9	0.144	27	2	85.7778	0.201557	0.00403114
2	9.18	175	3.6	1.6	26.9	0.144	27	2	85.7778	0.201557	0.0786073
3	9.18	175	3.6	1.6	26.9	0.144	27	2	85.7778	0.201557	0.17737
4	9.18	175	3.6	1.6	26.9	0.144	27	2	85.7778	0.201557	0.149152
5	9.18	175	3.6	1.6	26.9	0.144	27	2	85.7778	0.201557	0.185433
1	9.64	175	5.1	0.5	26.3	0.082	29	2	69.8697	0.0454747	0.156433
2	9.64	175	5.1	0.5	26.3	0.082	29	2	69.8697	0.0454747	0.116415
3	9.64	175	5.1	0.5	26.3	0.082	29	2	69.8697	0.0454747	0.0914042
4	9.64	175	5.1	0.5	26.3	0.082	29	2	69.8697	0.0454747	0.0700311
5	9.64	175	5.1	0.5	26.3	0.082	29	2	69.8697	0.0454747	0.0122782
1	9.18	175	5.1	0.5	26.3	0.082	27	2	85.7778	0.0358674	0.000717348
2	9.18	175	5.1	0.5	26.3	0.082	27	2	85.7778	0.0358674	0.0139883
3	9.18	175	5.1	0.5	26.3	0.082	27	2	85.7778	0.0358674	0.0315633
4	9.18	175	5.1	0.5	26.3	0.082	27	2	85.7778	0.0358674	0.0265419
5	9.18	175	5.1	0.5	26.3	0.082	27	2	85.7778	0.0358674	0.032998
1	9.18	175	3.1	1.1	29.5	0.322	27	2	85.7778	0.309859	0.00619718
2	9.18	175	3.1	1.1	29.5	0.322	27	2	85.7778	0.309859	0.120845
3	9.18	175	3.1	1.1	29.5	0.322	27	2	85.7778	0.309859	0.272676
4	9.18	175	3.1	1.1	29.5	0.322	27	2	85.7778	0.309859	0.229296
5	9.18	175	3.1	1.1	29.5	0.322	27	2	85.7778	0.309859	0.28507
1	9.64	175	3.9	1.8	27.8	0.307	27	2	69.8697	0.61291	2.10841
2	9.64	175	3.9	1.8	27.8	0.307	27	2	69.8697	0.61291	1.56905
3	9.64	175	3.9	1.8	27.8	0.307	27	2	69.8697	0.61291	1.23195
4	9.64	175	3.9	1.8	27.8	0.307	27	2	69.8697	0.61291	0.943882
5	9.64	175	3.9	1.8	27.8	0.307	27	2	69.8697	0.61291	0.165486
1	9.48	175	4	2.2	28	0.336	12	1	0	0.493854	2.02974
2	9.48	175	4	2.2	28	0.336	12	1	0	0.493854	1.78775
3	9.48	175	4	2.2	28	0.336	12	1	0	0.493854	2.3705
4	9.48	175	4	2.2	28	0.336	12	1	0	0.493854	3.21005
5	9.48	175	4	2.2	28	0.336	12	1	0	0.493854	2.04949
6	9.48	175	4	2.2	28	0.336	12	1	0	0.493854	1.6149
1	9.48	175	4	2.2	31	0.336	13	1	0	0.493854	2.02974
2	9.48	175	4	2.2	31	0.336	13	1	0	0.493854	1.78775
3	9.48	175	4	2.2	31	0.336	13	1	0	0.493854	2.3705
4	9.48	175	4	2.2	31	0.336	13	1	0	0.493854	3.21005
5	9.48	175	4	2.2	31	0.336	13	1	0	0.493854	2.04949
6	9.48	175	4	2.2	31	0.336	13	1	0	0.493854	1.6149
1	9.48	175	3.7	0.8	29	0.153	25	2	0	0.0885865	0.201977
2	9.48	175	3.7	0.8	29	0.153	25	2	0	0.0885865	0.201977
3	9.48	175	3.7	0.8	29	0.153	25	2	0	0.0885865	0.2507
4	9.48	175	3.7	0.8	29	0.153	25	2	0	0.0885865	0.239184
5	9.48	175	3.7	0.8	29	0.153	25	2	0	0.0885865	0.198434
6	9.48	175	3.7	0.8	29	0.153	25	2	0	0.0885865	0.185146
1	9.48	175	4.3	2.6	31	0.415	25	2	0	0.780922	1.7805
2	9.48	175	4.3	2.6	31	0.415	25	2	0	0.780922	1.7805
3	9.48	175	4.3	2.6	31	0.415	25	2	0	0.780922	2.21001
4	9.48	175	4.3	2.6	31	0.415	25	2	0	0.780922	2.10849
5	9.48	175	4.3	2.6	31	0.415	25	2	0	0.780922	1.74927
6	9.48	175	4.3	2.6	31	0.415	25	2	0	0.780922	1.63213
1	9.48	175	2.5	0.5	34	0.082	27	2	0	0.0296736	0.0676558
2	9.48	175	2.5	0.5	34	0.082	27	2	0	0.0296736	0.0676558
3	9.48	175	2.5	0.5	34	0.082	27	2	0	0.0296736	0.0839763
4	9.48	175	2.5	0.5	34	0.082	27	2	0	0.0296736	0.0801187
5	9.48	175	2.5	0.5	34	0.082	27	2	0	0.0296736	0.0664688
6	9.48	175	2.5	0.5	34	0.082	27	2	0	0.0296736	0.0620178
1	9.97	175	3	1.4	27.5	0.209	25	2	92.1005	0.501199	1.53367
2	9.97	175	3	1.4	27.5	0.209	25	2	92.1005	0.501199	1.59882
3	9.97	175	3	1.4	27.5	0.209	25	2	92.1005	0.501199	1.69405
4	9.97	175	3	1.4	27.5	0.209	25	2	92.1005	0.501199	1.68403
5	9.97	175	3	1.4	27.5	0.209	25	2	92.1005	0.501199	1.56374
6	9.97	175	3	1.4	27.5	0.209	25	2	92.1005	0.501199	1.04751
1	10.96	175	4.1	1.3	27.3	0.294	45	1	96.7694	0.539831	3.73023
2	10.96	175	4.1	1.3	27.3	0.294	45	1	96.7694	0.539831	4.39962
3	10.96	175	4.1	1.3	27.3	0.294	45	1	96.7694	0.539831	4.24847
4	10.96	175	4.1	1.3	27.3	0.294	45	1	96.7694	0.539831	4.02174
1	10.96	175	3	0.7	25.9	0.062	45	1	96.7694	0.0612994	0.423579
2	10.96	175	3	0.7	25.9	0.062	45	1	96.7694	0.0612994	0.49959
3	10.96	175	3	0.7	25.9	0.062	45	1	96.7694	0.0612994	0.482427
4	10.96	175	3	0.7	25.9	0.062	45	1	96.7694	0.0612994	0.456681
1	10.96	175	4.5	1.5	26.3	0.156	45	1	96.7694	0.330508	2.28381
2	10.96	175	4.5	1.5	26.3	0.156	45	1	96.7694	0.330508	2.69364
3	10.96	175	4.5	1.5	26.3	0.156	45	1	96.7694	0.330508	2.6011
4	10.96	175	4.5	1.5	26.3	0.156	45	1	96.7694	0.330508	2.46229
1	10.96	175	3.9	0.2	26.4	0.082	45	1	96.7694	0.0231638	0.160062
2	10.96	175	3.9	0.2	26.4	0.082	45	1	96.7694	0.0231638	0.188785
3	10.96	175	3.9	0.2	26.4	0.082	45	1	96.7694	0.0231638	0.182299
4	10.96	175	3.9	0.2	26.4	0.082	45	1	96.7694	0.0231638	0.172571
1	9.81	175	6.4	1.7	28.5	0.16	27	2	92.0294	0.110255	0.0893069
2	9.81	175	6.4	1.7	28.5	0.16	27	2	92.0294	0.110255	0.126794
3	9.81	175	6.4	1.7	28.5	0.16	27	2	92.0294	0.110255	0.174203
4	9.81	175	6.4	1.7	28.5	0.16	27	2	92.0294	0.110255	0.180819
5	9.81	175	6.4	1.7	28.5	0.16	27	2	92.0294	0.110255	0.134512
6	9.81	175	6.4	1.7	28.5	0.16	27	2	92.0294	0.110255	0.11246
1	9.81	175	5.4	1.4	29.2	0.18	27	2	92.0294	0.102148	0.0827402
2	9.81	175	5.4	1.4	29.2	0.18	27	2	92.0294	0.102148	0.117471
3	9.81	175	5.4	1.4	29.2	0.18	27	2	92.0294	0.102148	0.161394
4	9.81	175	5.4	1.4	29.2	0.18	27	2	92.0294	0.102148	0.167523
5	9.81	175	5.4	1.4	29.2	0.18	27	2	92.0294	0.102148	0.124621
6	9.81	175	5.4	1.4	29.2	0.18	27	2	92.0294	0.102148	0.104191
1	9.54	250	7.1	1.4	30.3	0.25	27	2	90.512	0.909091	1.86364
2	9.54	250	7.1	1.4	30.3	0.25	27	2	90.512	0.909091	1.24545
3	9.54	250	7.1	1.4	30.3	0.25	27	2	90.512	0.909091	1.44545
4	9.54	250	7.1	1.4	30.3	0.25	27	2	90.512	0.909091	3.08182
5	9.54	250	7.1	1.4	30.3	0.25	27	2	90.512	0.909091	2.81818
6	9.54	250	7.1	1.4	30.3	0.25	27	2	90.512	0.909091	3.54545
1	8.12	175	8.9	4	30.5	0.832	25	2	96.6204	0.640764	0.993184
2	8.12	175	8.9	4	30.5	0.832	25	2	96.6204	0.640764	0.467758
3	8.12	175	8.9	4	30.5	0.832	25	2	96.6204	0.640764	0.224267
4	8.12	175	8.9	4	30.5	0.832	25	2	96.6204	0.640764	0.262713
5	8.12	175	8.9	4	30.5	0.832	25	2	96.6204	0.640764	0.160191
6	8.12	175	8.9	4	30.5	0.832	25	2	96.6204	0.640764	0.0384458
1	9.79	175	5.8	0.4	25.4	0.09	25	2	98.074	0.160643	0.183133
2	9.79	175	5.8	0.4	25.4	0.09	25	2	98.074	0.160643	0.131727
3	9.79	175	5.8	0.4	25.4	0.09	25	2	98.074	0.160643	0.449799
4	9.79	175	5.8	0.4	25.4	0.09	25	2	98.074	0.160643	0.618474
5	9.79	175	5.8	0.4	25.4	0.09	25	2	98.074	0.160643	0.546185
6	9.79	175	5.8	0.4	25.4	0.09	25	2	98.074	0.160643	0.522088
1	9.79	175	6.7	0.5	27.4	0.109	25	2	98.074	0.243195	0.277242
2	9.79	175	6.7	0.5	27.4	0.109	25	2	98.074	0.243195	0.19942
3	9.79	175	6.7	0.5	27.4	0.109	25	2	98.074	0.243195	0.680946
4	9.79	175	6.7	0.5	27.4	0.109	25	2	98.074	0.243195	0.936301
5	9.79	175	6.7	0.5	27.4	0.109	25	2	98.074	0.243195	0.826863
6	9.79	175	6.7	0.5	27.4	0.109	25	2	98.074	0.243195	0.790384
1	9.77	175	3.8	1.1	26.2	0.15	25	2	89.3758	0.190399	0.150415
2	9.77	175	3.8	1.1	26.2	0.15	25	2	89.3758	0.190399	0.127568
3	9.77	175	3.8	1.1	26.2	0.15	25	2	89.3758	0.190399	0.163743
4	9.77	175	3.8	1.1	26.2	0.15	25	2	89.3758	0.190399	0.196111
5	9.77	175	3.8	1.1	26.2	0.15	25	2	89.3758	0.190399	0.180879
6	9.77	175	3.8	1.1	26.2	0.15	25	2	89.3758	0.190399	0.222767
1	9.62	175	2.6	1	26.4	0.123	25	2	94.3162	0.0634806	0.188537
2	9.62	175	2.6	1	26.4	0.123	25	2	94.3162	0.0634806	0.154893
3	9.62	175	2.6	1	26.4	0.123	25	2	94.3162	0.0634806	0.125057
4	9.62	175	2.6	1	26.4	0.123	25	2	94.3162	0.0634806	0.0787159
5	9.62	175	2.6	1	26.4	0.123	25	2	94.3162	0.0634806	0.0736375
6	9.62	175	2.6	1	26.4	0.123	25	2	94.3162	0.0634806	0.0730027
1	9.87	175	0.7	0.2	35	0.062	30	2	95.6579	0.0710602	0.112275
2	9.87	175	0.7	0.2	35	0.062	30	2	95.6579	0.0710602	0.152779
3	9.87	175	0.7	0.2	35	0.062	30	2	95.6579	0.0710602	0.238052
4	9.87	175	0.7	0.2	35	0.062	30	2	95.6579	0.0710602	0.239473
5	9.87	175	0.7	0.2	35	0.062	30	2	95.6579	0.0710602	0.33043
6	9.87	175	0.7	0.2	35	0.062	30	2	95.6579	0.0710602	0.372355
1	9.62	175	8.8	3.8	28.7	0.315	25	2	94.3162	0.617775	1.83479
2	9.62	175	8.8	3.8	28.7	0.315	25	2	94.3162	0.617775	1.50737
3	9.62	175	8.8	3.8	28.7	0.315	25	2	94.3162	0.617775	1.21702
4	9.62	175	8.8	3.8	28.7	0.315	25	2	94.3162	0.617775	0.76604
5	9.62	175	8.8	3.8	28.7	0.315	25	2	94.3162	0.617775	0.716618
6	9.62	175	8.8	3.8	28.7	0.315	25	2	94.3162	0.617775	0.710441
1	9.87	175	1	0.2	35	0.062	29	2	95.6579	0.0710602	0.112275
2	9.87	175	1	0.2	35	0.062	29	2	95.6579	0.0710602	0.152779
3	9.87	175	1	0.2	35	0.062	29	2	95.6579	0.0710602	0.238052
4	9.87	175	1	0.2	35	0.062	29	2	95.6579	0.0710602	0.239473
5	9.87	175	1	0.2	35	0.062	29	2	95.6579	0.0710602	0.33043
6	9.87	175	1	0.2	35	0.062	29	2	95.6579	0.0710602	0.372355
1	8.08	175	2.3	0.3	25	0.062	26.5	2	86.8232	0.00833035	0.0569796
2	8.08	175	2.3	0.3	25	0.062	26.5	2	86.8232	0.00833035	0.0420683
3	8.08	175	2.3	0.3	25	0.062	26.5	2	86.8232	0.00833035	0.0171605
4	8.08	175	2.3	0.3	25	0.062	26.5	2	86.8232	0.00833035	0.0105795
5	8.08	175	2.3	0.3	25	0.062	26.5	2	86.8232	0.00833035	0.000333214
6	8.08	175	2.3	0.3	25	0.062	26.5	2	86.8232	0.00833035	0.010163
1	10.58	175	3.6	0.4	24.4	0.062	45	1	90.5185	0.0404634	0.0109251
2	10.58	175	3.6	0.4	24.4	0.062	45	1	90.5185	0.0404634	0.150524
3	10.58	175	3.6	0.4	24.4	0.062	45	1	90.5185	0.0404634	0.141217
4	10.58	175	3.6	0.4	24.4	0.062	45	1	90.5185	0.0404634	0.116535
5	10.58	175	3.6	0.4	24.4	0.062	45	1	90.5185	0.0404634	0.121795
6	10.58	175	3.6	0.4	24.4	0.062	45	1	90.5185	0.0404634	0.118558
1	11.14	175	4.3	0.7	25.2	0.07	27	2	94.4473	0.319426	0.252347
2	11.14	175	4.3	0.7	25.2	0.07	27	2	94.4473	0.319426	0.118188
3	11.14	175	4.3	0.7	25.2	0.07	27	2	94.4473	0.319426	0.118188
4	11.14	175	4.3	0.7	25.2	0.07	27	2	94.4473	0.319426	0.124576
5	11.14	175	4.3	0.7	25.2	0.07	27	2	94.4473	0.319426	0.245958
6	11.14	175	4.3	0.7	25.2	0.07	27	2	94.4473	0.319426	0.146936
1	9.96	175	4.9	1.5	27.4	0.203	27	2	90.9284	0.243308	0.917271
2	9.96	175	4.9	1.5	27.4	0.203	27	2	90.9284	0.243308	0.26034
3	9.96	175	4.9	1.5	27.4	0.203	27	2	90.9284	0.243308	0.442821
4	9.96	175	4.9	1.5	27.4	0.203	27	2	90.9284	0.243308	0.581506
5	9.96	175	4.9	1.5	27.4	0.203	27	2	90.9284	0.243308	0.720192
6	9.96	175	4.9	1.5	27.4	0.203	27	2	90.9284	0.243308	0.722625
1	9.96	175	7	3	27.5	0.278	27	2	90.9284	0.6664	2.51233
2	9.96	175	7	3	27.5	0.278	27	2	90.9284	0.6664	0.713048
3	9.96	175	7	3	27.5	0.278	27	2	90.9284	0.6664	1.21285
4	9.96	175	7	3	27.5	0.278	27	2	90.9284	0.6664	1.5927
5	9.96	175	7	3	27.5	0.278	27	2	90.9284	0.6664	1.97254
6	9.96	175	7	3	27.5	0.278	27	2	90.9284	0.6664	1.97921
1	9.55	175	5	1.1	28.1	0.318	17	2	97.4944	0.158137	0.00158137
2	9.55	175	5	1.1	28.1	0.318	17	2	97.4944	0.158137	0.234043
3	9.55	175	5	1.1	28.1	0.318	17	2	97.4944	0.158137	0.319438
4	9.55	175	5	1.1	28.1	0.318	17	2	97.4944	0.158137	0.308368
5	9.55	175	5	1.1	28.1	0.318	17	2	97.4944	0.158137	0.202416
6	9.55	175	5	1.1	28.1	0.318	17	2	97.4944	0.158137	0.192928
1	9.55	175	4.1	0.5	27.7	0.112	29	2	79.2377	0.177609	0.877387
2	9.55	175	4.1	0.5	27.7	0.112	29	2	79.2377	0.177609	1.09762
3	9.55	175	4.1	0.5	27.7	0.112	29	2	79.2377	0.177609	0.951982
4	9.55	175	4.1	0.5	27.7	0.112	29	2	79.2377	0.177609	0.747732
5	9.55	175	4.1	0.5	27.7	0.112	29	2	79.2377	0.177609	0.713987
6	9.55	175	4.1	0.5	27.7	0.112	29	2	79.2377	0.177609	0.564795
1	9.55	175	7.4	0.7	24	0.082	29	2	79.2377	0.182049	0.899321
2	9.55	175	7.4	0.7	24	0.082	29	2	79.2377	0.182049	1.12506
3	9.55	175	7.4	0.7	24	0.082	29	2	79.2377	0.182049	0.975782
4	9.55	175	7.4	0.7	24	0.082	29	2	79.2377	0.182049	0.766426
5	9.55	175	7.4	0.7	24	0.082	29	2	79.2377	0.182049	0.731836
6	9.55	175	7.4	0.7	24	0.082	29	2	79.2377	0.182049	0.578915
1	10.21	175	3	0.9	29	0.163	44	2	0	0.641452	0.481089
2	10.21	175	3	0.9	29	0.163	44	2	0	0.641452	0.295068
1	9.68	175	8.6	5.2	30.2	0.25	28	2	93.3992	0.801974	5.46144
2	9.68	175	8.6	5.2	30.2	0.25	28	2	93.3992	0.801974	1.3393
3	9.68	175	8.6	5.2	30.2	0.25	28	2	93.3992	0.801974	1.81246
4	9.68	175	8.6	5.2	30.2	0.25	28	2	93.3992	0.801974	2.02899
5	9.68	175	8.6	5.2	30.2	0.25	28	2	93.3992	0.801974	2.36582
6	9.68	175	8.6	5.2	30.2	0.25	28	2	93.3992	0.801974	2.41394
1	9.9	250	2.1	0.8	30	0.19	29	2	96.5998	0.697248	0.543853
2	9.9	250	2.1	0.8	30	0.19	29	2	96.5998	0.697248	0.230092
3	9.9	250	2.1	0.8	30	0.19	29	2	96.5998	0.697248	0.502018
4	9.9	250	2.1	0.8	30	0.19	29	2	96.5998	0.697248	0.209174
5	9.9	250	2.1	0.8	30	0.19	29	2	96.5998	0.697248	0.0348624
6	9.9	250	2.1	0.8	30	0.19	29	2	96.5998	0.697248	1.20624
1	9.25	175	1.9	0.6	25.7	0.072	27	2	66.4516	0.0144501	0.106208
2	9.25	175	1.9	0.6	25.7	0.072	27	2	66.4516	0.0144501	0.0959486
3	9.25	175	1.9	0.6	25.7	0.072	27	2	66.4516	0.0144501	0.100573
4	9.25	175	1.9	0.6	25.7	0.072	27	2	66.4516	0.0144501	0.104619
5	9.25	175	1.9	0.6	25.7	0.072	27	2	66.4516	0.0144501	0.108087
6	9.25	175	1.9	0.6	25.7	0.072	27	2	66.4516	0.0144501	0.117479
1	9.25	175	7.2	3.5	29	0.402	25	2	66.4516	0.470632	3.45914
2	9.25	175	7.2	3.5	29	0.402	25	2	66.4516	0.470632	3.12499
3	9.25	175	7.2	3.5	29	0.402	25	2	66.4516	0.470632	3.2756
4	9.25	175	7.2	3.5	29	0.402	25	2	66.4516	0.470632	3.40737
5	9.25	175	7.2	3.5	29	0.402	25	2	66.4516	0.470632	3.52032
6	9.25	175	7.2	3.5	29	0.402	25	2	66.4516	0.470632	3.82623
1	9.25	175	2.7	0.5	25	0.101	27	2	66.4516	0.0168919	0.124155
2	9.25	175	2.7	0.5	25	0.101	27	2	66.4516	0.0168919	0.112162
3	9.25	175	2.7	0.5	25	0.101	27	2	66.4516	0.0168919	0.117568
4	9.25	175	2.7	0.5	25	0.101	27	2	66.4516	0.0168919	0.122297
5	9.25	175	2.7	0.5	25	0.101	27	2	66.4516	0.0168919	0.126351
6	9.25	175	2.7	0.5	25	0.101	27	2	66.4516	0.0168919	0.137331
1	9.25	175	3.6	0.6	26.5	0.156	27	2	66.4516	0.0313085	0.230118
2	9.25	175	3.6	0.6	26.5	0.156	27	2	66.4516	0.0313085	0.207889
3	9.25	175	3.6	0.6	26.5	0.156	27	2	66.4516	0.0313085	0.217907
4	9.25	175	3.6	0.6	26.5	0.156	27	2	66.4516	0.0313085	0.226674
5	9.25	175	3.6	0.6	26.5	0.156	27	2	66.4516	0.0313085	0.234188
6	9.25	175	3.6	0.6	26.5	0.156	27	2	66.4516	0.0313085	0.254538
1	9.96	175	3.8	1.9	27.2	0.237	25	2	97.7459	0.125268	0.164101
2	9.96	175	3.8	1.9	27.2	0.237	25	2	97.7459	0.125268	0.179133
3	9.96	175	3.8	1.9	27.2	0.237	25	2	97.7459	0.125268	0.139047
4	9.96	175	3.8	1.9	27.2	0.237	25	2	97.7459	0.125268	0.106478
5	9.96	175	3.8	1.9	27.2	0.237	25	2	97.7459	0.125268	0.124015
6	9.96	175	3.8	1.9	27.2	0.237	25	2	97.7459	0.125268	0.166606
1	9.96	175	4.2	2	27.2	0.297	25	2	97.7459	0.165243	0.216469
2	9.96	175	4.2	2	27.2	0.297	25	2	97.7459	0.165243	0.236298
3	9.96	175	4.2	2	27.2	0.297	25	2	97.7459	0.165243	0.18342
4	9.96	175	4.2	2	27.2	0.297	25	2	97.7459	0.165243	0.140457
5	9.96	175	4.2	2	27.2	0.297	25	2	97.7459	0.165243	0.163591
6	9.96	175	4.2	2	27.2	0.297	25	2	97.7459	0.165243	0.219774
1	9.96	175	1.5	1.5	27.5	0.302	25	2	97.7459	0.126019	0.165085
2	9.96	175	1.5	1.5	27.5	0.302	25	2	97.7459	0.126019	0.180207
3	9.96	175	1.5	1.5	27.5	0.302	25	2	97.7459	0.126019	0.139881
4	9.96	175	1.5	1.5	27.5	0.302	25	2	97.7459	0.126019	0.107116
5	9.96	175	1.5	1.5	27.5	0.302	25	2	97.7459	0.126019	0.124759
6	9.96	175	1.5	1.5	27.5	0.302	25	2	97.7459	0.126019	0.167605
1	9.96	175	7.6	4.7	27.5	0.358	25	2	97.7459	0.468078	0.613182
2	9.96	175	7.6	4.7	27.5	0.358	25	2	97.7459	0.468078	0.669352
3	9.96	175	7.6	4.7	27.5	0.358	25	2	97.7459	0.468078	0.519567
4	9.96	175	7.6	4.7	27.5	0.358	25	2	97.7459	0.468078	0.397866
5	9.96	175	7.6	4.7	27.5	0.358	25	2	97.7459	0.468078	0.463397
6	9.96	175	7.6	4.7	27.5	0.358	25	2	97.7459	0.468078	0.622544
1	9.96	175	2.3	0.4	25.2	0.071	27	2	97.7459	0.00790052	0.0103497
2	9.96	175	2.3	0.4	25.2	0.071	27	2	97.7459	0.00790052	0.0112977
3	9.96	175	2.3	0.4	25.2	0.071	27	2	97.7459	0.00790052	0.00876958
4	9.96	175	2.3	0.4	25.2	0.071	27	2	97.7459	0.00790052	0.00671544
5	9.96	175	2.3	0.4	25.2	0.071	27	2	97.7459	0.00790052	0.00782152
6	9.96	175	2.3	0.4	25.2	0.071	27	2	97.7459	0.00790052	0.0105077
1	9.96	175	2.6	1.4	27.5	0.276	25	2	97.7459	0.107492	0.140814
2	9.96	175	2.6	1.4	27.5	0.276	25	2	97.7459	0.107492	0.153713
3	9.96	175	2.6	1.4	27.5	0.276	25	2	97.7459	0.107492	0.119316
4	9.96	175	2.6	1.4	27.5	0.276	25	2	97.7459	0.107492	0.0913678
5	9.96	175	2.6	1.4	27.5	0.276	25	2	97.7459	0.107492	0.106417
6	9.96	175	2.6	1.4	27.5	0.276	25	2	97.7459	0.107492	0.142964
1	9.5	175	7	4.8	29.5	0.28	25	2	96.391	0.691714	1.28659
2	9.5	175	7	4.8	29.5	0.28	25	2	96.391	0.691714	1.14133
3	9.5	175	7	4.8	29.5	0.28	25	2	96.391	0.691714	0.885394
4	9.5	175	7	4.8	29.5	0.28	25	2	96.391	0.691714	0.767802
5	9.5	175	7	4.8	29.5	0.28	25	2	96.391	0.691714	0.968399
6	9.5	175	7	4.8	29.5	0.28	25	2	96.391	0.691714	1.37651
1	9.36	250	4.4	1.4	26.2	0.167	47	2	93.7916	0.684627	3.27936
2	9.36	250	4.4	1.4	26.2	0.167	47	2	93.7916	0.684627	2.60158
3	9.36	250	4.4	1.4	26.2	0.167	47	2	93.7916	0.684627	2.70428
4	9.36	250	4.4	1.4	26.2	0.167	47	2	93.7916	0.684627	4.11461
5	9.36	250	4.4	1.4	26.2	0.167	47	2	93.7916	0.684627	4.14884
6	9.36	250	4.4	1.4	26.2	0.167	47	2	93.7916	0.684627	3.63537
1	9.46	175	4.3	2.6	35	0.4	27	2	94.9192	0.354103	0.740075
2	9.46	175	4.3	2.6	35	0.4	27	2	94.9192	0.354103	0.648008
3	9.46	175	4.3	2.6	35	0.4	27	2	94.9192	0.354103	0.591352
4	9.46	175	4.3	2.6	35	0.4	27	2	94.9192	0.354103	0.609057
5	9.46	175	4.3	2.6	35	0.4	27	2	94.9192	0.354103	0.563023
6	9.46	175	4.3	2.6	35	0.4	27	2	94.9192	0.354103	0.48158
1	9.44	175	5	1	28.2	0.066	27	2	0	0.0275586	0.0231492
2	9.44	175	5	1	28.2	0.066	27	2	0	0.0275586	0.0256295
3	9.44	175	5	1	28.2	0.066	27	2	0	0.0275586	0.0432669
4	9.44	175	5	1	28.2	0.066	27	2	0	0.0275586	0.0490542
5	9.44	175	5	1	28.2	0.066	27	2	0	0.0275586	0.0369285
6	9.44	175	5	1	28.2	0.066	27	2	0	0.0275586	0.0311412
1	9.91	175	2	0.8	35	0.13	27	2	82.194	0.0643564	0.425396
2	9.91	175	2	0.8	35	0.13	27	2	82.194	0.0643564	0.223317
3	9.91	175	2	0.8	35	0.13	27	2	82.194	0.0643564	0.287673
4	9.91	175	2	0.8	35	0.13	27	2	82.194	0.0643564	0.278663
5	9.91	175	2	0.8	35	0.13	27	2	82.194	0.0643564	0.289604
6	9.91	175	2	0.8	35	0.13	27	2	82.194	0.0643564	0.122277
1	7.99	250	2.3	1.8	37	0.852	61	2	97.4257	0.21546	0.232697
2	7.99	250	2.3	1.8	37	0.852	61	2	97.4257	0.21546	0.269325
3	7.99	250	2.3	1.8	37	0.852	61	2	97.4257	0.21546	0.200378
4	7.99	250	2.3	1.8	37	0.852	61	2	97.4257	0.21546	0.15944
5	7.99	250	2.3	1.8	37	0.852	61	2	97.4257	0.21546	0.122812
6	7.99	250	2.3	1.8	37	0.852	61	2	97.4257	0.21546	0.0581742
1	8.93	175	3	2	29.7	0.368	24	2	95.6814	0.733068	0.131952
2	8.93	175	3	2	29.7	0.368	24	2	95.6814	0.733068	0.271235
3	8.93	175	3	2	29.7	0.368	24	2	95.6814	0.733068	0.161275
4	8.93	175	3	2	29.7	0.368	24	2	95.6814	0.733068	0.278566
5	8.93	175	3	2	29.7	0.368	24	2	95.6814	0.733068	0.491155
1	11.11	175	2.8	1.1	24.4	0.22	38	1	0	0.108872	0.0979845
2	11.11	175	2.8	1.1	24.4	0.22	38	1	0	0.108872	0.0860086
3	11.11	175	2.8	1.1	24.4	0.22	38	1	0	0.108872	0.186171
4	11.11	175	2.8	1.1	24.4	0.22	38	1	0	0.108872	0.250405
5	11.11	175	2.8	1.1	24.4	0.22	38	1	0	0.108872	0.360365
1	11.11	175	2.7	1.4	26.7	0.2	38	1	0	0.125967	0.113371
2	11.11	175	2.7	1.4	26.7	0.2	38	1	0	0.125967	0.0995141
3	11.11	175	2.7	1.4	26.7	0.2	38	1	0	0.125967	0.215404
4	11.11	175	2.7	1.4	26.7	0.2	38	1	0	0.125967	0.289725
5	11.11	175	2.7	1.4	26.7	0.2	38	1	0	0.125967	0.416952
1	11.11	175	5.6	2.7	29	0.274	38	1	0	0.332823	0.299541
2	11.11	175	5.6	2.7	29	0.274	38	1	0	0.332823	0.262931
3	11.11	175	5.6	2.7	29	0.274	38	1	0	0.332823	0.569128
4	11.11	175	5.6	2.7	29	0.274	38	1	0	0.332823	0.765494
5	11.11	175	5.6	2.7	29	0.274	38	1	0	0.332823	1.10165
1	9.69	175	2.9	1.2	28.5	0.3	27	2	95.3297	0.094687	0.245239
2	9.69	175	2.9	1.2	28.5	0.3	27	2	95.3297	0.094687	0.256602
3	9.69	175	2.9	1.2	28.5	0.3	27	2	95.3297	0.094687	0.291636
4	9.69	175	2.9	1.2	28.5	0.3	27	2	95.3297	0.094687	0.238611
5	9.69	175	2.9	1.2	28.5	0.3	27	2	95.3297	0.094687	0.233877
6	9.69	175	2.9	1.2	28.5	0.3	27	2	95.3297	0.094687	0.297317
1	9.69	175	4.3	2.8	29.9	0.57	25	2	95.3297	0.419779	1.08723
2	9.69	175	4.3	2.8	29.9	0.57	25	2	95.3297	0.419779	1.1376
3	9.69	175	4.3	2.8	29.9	0.57	25	2	95.3297	0.419779	1.29292
4	9.69	175	4.3	2.8	29.9	0.57	25	2	95.3297	0.419779	1.05784
5	9.69	175	4.3	2.8	29.9	0.57	25	2	95.3297	0.419779	1.03685
6	9.69	175	4.3	2.8	29.9	0.57	25	2	95.3297	0.419779	1.31811
1	9.69	175	5.8	1.1	28.6	0.26	27	2	95.3297	0.0752236	0.194829
2	9.69	175	5.8	1.1	28.6	0.26	27	2	95.3297	0.0752236	0.203856
3	9.69	175	5.8	1.1	28.6	0.26	27	2	95.3297	0.0752236	0.231689
4	9.69	175	5.8	1.1	28.6	0.26	27	2	95.3297	0.0752236	0.189563
5	9.69	175	5.8	1.1	28.6	0.26	27	2	95.3297	0.0752236	0.185802
6	9.69	175	5.8	1.1	28.6	0.26	27	2	95.3297	0.0752236	0.236202
1	9.69	175	5.2	3	28.7	0.52	25	2	95.3297	0.41031	1.0627
2	9.69	175	5.2	3	28.7	0.52	25	2	95.3297	0.41031	1.11194
3	9.69	175	5.2	3	28.7	0.52	25	2	95.3297	0.41031	1.26376
4	9.69	175	5.2	3	28.7	0.52	25	2	95.3297	0.41031	1.03398
5	9.69	175	5.2	3	28.7	0.52	25	2	95.3297	0.41031	1.01347
6	9.69	175	5.2	3	28.7	0.52	25	2	95.3297	0.41031	1.28837
1	9.69	175	0.9	0.2	33	0.005	29	2	98.1818	0.00632911	0.015443
2	9.69	175	0.9	0.2	33	0.005	29	2	98.1818	0.00632911	0.00398734
3	9.69	175	0.9	0.2	33	0.005	29	2	98.1818	0.00632911	0.0276582
4	9.69	175	0.9	0.2	33	0.005	29	2	98.1818	0.00632911	0.029557
5	9.69	175	0.9	0.2	33	0.005	29	2	98.1818	0.00632911	0.0300633
6	9.69	175	0.9	0.2	33	0.005	29	2	98.1818	0.00632911	0.0303165
1	9.69	175	1.4	0.6	34	0.02	27	2	98.1818	0.0759494	0.185316
2	9.69	175	1.4	0.6	34	0.02	27	2	98.1818	0.0759494	0.0478481
3	9.69	175	1.4	0.6	34	0.02	27	2	98.1818	0.0759494	0.331899
4	9.69	175	1.4	0.6	34	0.02	27	2	98.1818	0.0759494	0.354684
5	9.69	175	1.4	0.6	34	0.02	27	2	98.1818	0.0759494	0.360759
6	9.69	175	1.4	0.6	34	0.02	27	2	98.1818	0.0759494	0.363797
1	9.69	175	1.8	0.3	32	0.08	29	2	98.1818	0.151899	0.370633
2	9.69	175	1.8	0.3	32	0.08	29	2	98.1818	0.151899	0.0956962
3	9.69	175	1.8	0.3	32	0.08	29	2	98.1818	0.151899	0.663797
4	9.69	175	1.8	0.3	32	0.08	29	2	98.1818	0.151899	0.709367
5	9.69	175	1.8	0.3	32	0.08	29	2	98.1818	0.151899	0.721519
6	9.69	175	1.8	0.3	32	0.08	29	2	98.1818	0.151899	0.727595
1	7.94	200	5.1	1.2	33	0.207	49	2	94.2767	0.0645815	0.066519
2	7.94	200	5.1	1.2	33	0.207	49	2	94.2767	0.0645815	0.0439155
3	7.94	200	5.1	1.2	33	0.207	49	2	94.2767	0.0645815	0.278992
4	7.94	200	5.1	1.2	33	0.207	49	2	94.2767	0.0645815	0.388781
5	7.94	200	5.1	1.2	33	0.207	49	2	94.2767	0.0645815	0.402343
1	7.94	200	3.9	2.3	30	1.109	32	2	94.2767	0.663157	0.683052
2	7.94	200	3.9	2.3	30	1.109	32	2	94.2767	0.663157	0.450947
3	7.94	200	3.9	2.3	30	1.109	32	2	94.2767	0.663157	2.86484
4	7.94	200	3.9	2.3	30	1.109	32	2	94.2767	0.663157	3.9922
5	7.94	200	3.9	2.3	30	1.109	32	2	94.2767	0.663157	4.13147
1	7.88	250	2.9	2	36	0.63	29	2	97.6724	0.211105	0.34199
2	7.88	250	2.9	2	36	0.63	29	2	97.6724	0.211105	0.650203
3	7.88	250	2.9	2	36	0.63	29	2	97.6724	0.211105	1.03864
4	7.88	250	2.9	2	36	0.63	29	2	97.6724	0.211105	1.00275
5	7.88	250	2.9	2	36	0.63	29	2	97.6724	0.211105	0.795865
6	7.88	250	2.9	2	36	0.63	29	2	97.6724	0.211105	0.916195
1	7.88	250	4.8	2.6	32	0.41	29	2	97.6724	0.178601	0.289334
2	7.88	250	4.8	2.6	32	0.41	29	2	97.6724	0.178601	0.550092
3	7.88	250	4.8	2.6	32	0.41	29	2	97.6724	0.178601	0.878719
4	7.88	250	4.8	2.6	32	0.41	29	2	97.6724	0.178601	0.848356
5	7.88	250	4.8	2.6	32	0.41	29	2	97.6724	0.178601	0.673327
6	7.88	250	4.8	2.6	32	0.41	29	2	97.6724	0.178601	0.77513
1	9.46	175	8.6	1.9	28.4	0.116	29	2	93.9394	0.102274	0.137047
2	9.46	175	8.6	1.9	28.4	0.116	29	2	93.9394	0.102274	0.147274
3	9.46	175	8.6	1.9	28.4	0.116	29	2	93.9394	0.102274	0.13091
4	9.46	175	8.6	1.9	28.4	0.116	29	2	93.9394	0.102274	0.163638
5	9.46	175	8.6	1.9	28.4	0.116	29	2	93.9394	0.102274	0.113524
1	9.46	175	5.7	2.1	27.7	0.21	29	2	93.9394	0.20464	0.274218
2	9.46	175	5.7	2.1	27.7	0.21	29	2	93.9394	0.20464	0.294682
3	9.46	175	5.7	2.1	27.7	0.21	29	2	93.9394	0.20464	0.26194
4	9.46	175	5.7	2.1	27.7	0.21	29	2	93.9394	0.20464	0.327425
5	9.46	175	5.7	2.1	27.7	0.21	29	2	93.9394	0.20464	0.227151
1	7.88	175	6.7	3.8	28.9	0.501	25	2	84.552	0.961224	0.134571
2	7.88	175	6.7	3.8	28.9	0.501	25	2	84.552	0.961224	0.740142
3	7.88	175	6.7	3.8	28.9	0.501	25	2	84.552	0.961224	0.576734
4	7.88	175	6.7	3.8	28.9	0.501	25	2	84.552	0.961224	1.52835
5	7.88	175	6.7	3.8	28.9	0.501	25	2	84.552	0.961224	2.75871
1	9.54	212	9.3	3.3	31.5	0.909	27	2	93.4104	0.625302	1.5445
2	9.54	212	9.3	3.3	31.5	0.909	27	2	93.4104	0.625302	1.557
3	9.54	212	9.3	3.3	31.5	0.909	27	2	93.4104	0.625302	2.08851
4	9.54	212	9.3	3.3	31.5	0.909	27	2	93.4104	0.625302	2.42617
5	9.54	212	9.3	3.3	31.5	0.909	27	2	93.4104	0.625302	3.32661
6	9.54	212	9.3	3.3	31.5	0.909	27	2	93.4104	0.625302	2.03223
1	7.46	175	4.9	1.1	28.5	0.46	25	2	91.9765	0.48696	1.44627
2	7.46	175	4.9	1.1	28.5	0.46	25	2	91.9765	0.48696	1.56801
3	7.46	175	4.9	1.1	28.5	0.46	25	2	91.9765	0.48696	1.58749
4	7.46	175	4.9	1.1	28.5	0.46	25	2	91.9765	0.48696	1.47062
5	7.46	175	4.9	1.1	28.5	0.46	25	2	91.9765	0.48696	1.53879
6	7.46	175	4.9	1.1	28.5	0.46	25	2	91.9765	0.48696	1.37323
1	7.46	175	5.7	1.5	27.5	0.307	25	2	91.9765	0.443172	1.31622
2	7.46	175	5.7	1.5	27.5	0.307	25	2	91.9765	0.443172	1.42701
3	7.46	175	5.7	1.5	27.5	0.307	25	2	91.9765	0.443172	1.44474
4	7.46	175	5.7	1.5	27.5	0.307	25	2	91.9765	0.443172	1.33838
5	7.46	175	5.7	1.5	27.5	0.307	25	2	91.9765	0.443172	1.40042
6	7.46	175	5.7	1.5	27.5	0.307	25	2	91.9765	0.443172	1.24974
1	8.32	200	6.5	2.5	26.5	0.998	31	2	92.2344	0.723188	1.50423
2	8.32	200	6.5	2.5	26.5	0.998	31	2	92.2344	0.723188	0.520696
1	8.77	250	3.5	1.5	26.5	0.154	29	2	94.5419	0.367133	0.91049
2	8.77	250	3.5	1.5	26.5	0.154	29	2	94.5419	0.367133	1.6264
3	8.77	250	3.5	1.5	26.5	0.154	29	2	94.5419	0.367133	2.06696
4	8.77	250	3.5	1.5	26.5	0.154	29	2	94.5419	0.367133	2.39738
5	8.77	250	3.5	1.5	26.5	0.154	29	2	94.5419	0.367133	1.42448
6	8.77	250	3.5	1.5	26.5	0.154	29	2	94.5419	0.367133	1.41346
1	8.76	250	7.6	1.9	28.6	0.595	29	2	93.3063	0.465667	1.62052
2	8.76	250	7.6	1.9	28.6	0.595	29	2	93.3063	0.465667	1.55533
3	8.76	250	7.6	1.9	28.6	0.595	29	2	93.3063	0.465667	1.49945
4	8.76	250	7.6	1.9	28.6	0.595	29	2	93.3063	0.465667	0.256117
1	8.9	106	1.2	0.3	30	0.078	9.5	2	98.3848	1	12.03
2	8.9	106	1.2	0.3	30	0.078	9.5	2	98.3848	1	11.21
3	8.9	106	1.2	0.3	30	0.078	9.5	2	98.3848	1	8.69
4	8.9	106	1.2	0.3	30	0.078	9.5	2	98.3848	1	7.36
5	8.9	106	1.2	0.3	30	0.078	9.5	2	98.3848	1	8.32
6	8.9	106	1.2	0.3	30	0.078	9.5	2	98.3848	1	5.63
1	9.6	125	3.5	0.7	30	0.062	19	2	96.8893	0.141368	0.0551336
2	9.6	125	3.5	0.7	30	0.062	19	2	96.8893	0.141368	0.0876482
3	9.6	125	3.5	0.7	30	0.062	19	2	96.8893	0.141368	0.0523062
4	9.6	125	3.5	0.7	30	0.062	19	2	96.8893	0.141368	0.0749251
5	9.6	125	3.5	0.7	30	0.062	19	2	96.8893	0.141368	0.00989577
6	9.6	125	3.5	0.7	30	0.062	19	2	96.8893	0.141368	0.0735114
1	7.89	225	5.1	2.4	27.2	0.308	27	2	95.3941	0.221211	0.327393
2	7.89	225	5.1	2.4	27.2	0.308	27	2	95.3941	0.221211	0.948997
3	7.89	225	5.1	2.4	27.2	0.308	27	2	95.3941	0.221211	0.285363
4	7.89	225	5.1	2.4	27.2	0.308	27	2	95.3941	0.221211	0.305272
5	7.89	225	5.1	2.4	27.2	0.308	27	2	95.3941	0.221211	0.402605
6	7.89	225	5.1	2.4	27.2	0.308	27	2	95.3941	0.221211	0.568513
1	7.89	225	4.6	2.9	27.6	0.403	27	2	95.3941	0.349743	0.517619
2	7.89	225	4.6	2.9	27.6	0.403	27	2	95.3941	0.349743	1.5004
3	7.89	225	4.6	2.9	27.6	0.403	27	2	95.3941	0.349743	0.451168
4	7.89	225	4.6	2.9	27.6	0.403	27	2	95.3941	0.349743	0.482645
5	7.89	225	4.6	2.9	27.6	0.403	27	2	95.3941	0.349743	0.636532
6	7.89	225	4.6	2.9	27.6	0.403	27	2	95.3941	0.349743	0.898839
1	6.43	150	3	0.9	32	0.1	29	2	92.5333	0.00924404	0.00147905
2	6.43	150	3	0.9	32	0.1	29	2	92.5333	0.00924404	0.00184881
3	6.43	150	3	0.9	32	0.1	29	2	92.5333	0.00924404	0.00194125
4	6.43	150	3	0.9	32	0.1	29	2	92.5333	0.00924404	0.00415982
5	6.43	150	3	0.9	32	0.1	29	2	92.5333	0.00924404	0.00600863
1	6.43	150	1.6	0.7	38	0.1	29	2	92.5333	0.00718981	0.00115037
2	6.43	150	1.6	0.7	38	0.1	29	2	92.5333	0.00718981	0.00143796
3	6.43	150	1.6	0.7	38	0.1	29	2	92.5333	0.00718981	0.00150986
4	6.43	150	1.6	0.7	38	0.1	29	2	92.5333	0.00718981	0.00323541
5	6.43	150	1.6	0.7	38	0.1	29	2	92.5333	0.00718981	0.00467338
1	8.78	250	7.6	2.1	28.5	0.36	25	2	95.5164	0.771429	0.00771429
2	8.78	250	7.6	2.1	28.5	0.36	25	2	95.5164	0.771429	0.833143
3	8.78	250	7.6	2.1	28.5	0.36	25	2	95.5164	0.771429	1.22657
4	8.78	250	7.6	2.1	28.5	0.36	25	2	95.5164	0.771429	1.296
5	8.78	250	7.6	2.1	28.5	0.36	25	2	95.5164	0.771429	2.12143
6	8.78	250	7.6	2.1	28.5	0.36	25	2	95.5164	0.771429	2.808
1	8.87	220	5	4.6	31.1	0.7	47	2	93.3555	0.67364	0
2	8.87	220	5	4.6	31.1	0.7	47	2	93.3555	0.67364	0.229038
3	8.87	220	5	4.6	31.1	0.7	47	2	93.3555	0.67364	0.532176
4	8.87	220	5	4.6	31.1	0.7	47	2	93.3555	0.67364	0.754477
5	8.87	220	5	4.6	31.1	0.7	47	2	93.3555	0.67364	0.902678
6	8.87	220	5	4.6	31.1	0.7	47	2	93.3555	0.67364	0.565858
1	8.63	220	7.1	3.3	32	0.44	45	2	94.3231	0.75	0.15
2	8.63	220	7.1	3.3	32	0.44	45	2	94.3231	0.75	0.1425
1	8.86	250	9.1	3	29.8	0.26	29	2	94.4374	0.736544	1.80453
2	8.86	250	9.1	3	29.8	0.26	29	2	94.4374	0.736544	1.88555
3	8.86	250	9.1	3	29.8	0.26	29	2	94.4374	0.736544	1.4068
4	8.86	250	9.1	3	29.8	0.26	29	2	94.4374	0.736544	0.707082
1	8.42	220	4.6	2.5	30.6	0.38	29	2	96.3303	0.315615	0.192525
2	8.42	220	4.6	2.5	30.6	0.38	29	2	96.3303	0.315615	0.176744
1	9.53	125	6.6	2.2	29	0.25	25	2	0	0.261035	0.582107
2	9.53	125	6.6	2.2	29	0.25	25	2	0	0.261035	0.365449
3	9.53	125	6.6	2.2	29	0.25	25	2	0	0.261035	0.125297
4	9.53	125	6.6	2.2	29	0.25	25	2	0	0.261035	0.0156621
5	9.53	125	6.6	2.2	29	0.25	25	2	0	0.261035	0.00522069
6	9.53	125	6.6	2.2	29	0.25	25	2	0	0.261035	0.00261035
1	9.53	125	4.6	1.1	29.7	0.34	25	2	0	0.177504	0.395833
2	9.53	125	4.6	1.1	29.7	0.34	25	2	0	0.177504	0.248505
3	9.53	125	4.6	1.1	29.7	0.34	25	2	0	0.177504	0.0852017
4	9.53	125	4.6	1.1	29.7	0.34	25	2	0	0.177504	0.0106502
5	9.53	125	4.6	1.1	29.7	0.34	25	2	0	0.177504	0.00355007
6	9.53	125	4.6	1.1	29.7	0.34	25	2	0	0.177504	0.00177504
1	9.67	300	8.6	2.4	29.8	0.22	27	2	98.4375	0.266667	0.770667
2	9.67	300	8.6	2.4	29.8	0.22	27	2	98.4375	0.266667	0.808
3	9.67	300	8.6	2.4	29.8	0.22	27	2	98.4375	0.266667	0.408
4	9.67	300	8.6	2.4	29.8	0.22	27	2	98.4375	0.266667	0.893333
5	9.67	300	8.6	2.4	29.8	0.22	27	2	98.4375	0.266667	0.941333
6	9.67	300	8.6	2.4	29.8	0.22	27	2	98.4375	0.266667	0.866667
1	8.09	220	8.9	6.2	30	0.23	29	2	93.7928	0.778809	1.23831
2	8.09	220	8.9	6.2	30	0.23	29	2	93.7928	0.778809	1.18379
3	8.09	220	8.9	6.2	30	0.23	29	2	93.7928	0.778809	1.12149
4	8.09	220	8.9	6.2	30	0.23	29	2	93.7928	0.778809	0.786597
5	8.09	220	8.9	6.2	30	0.23	29	2	93.7928	0.778809	0.607471
6	8.09	220	8.9	6.2	30	0.23	29	2	93.7928	0.778809	0.16355
1	9.29	125	7	4.4	30.1	0.52	27	2	0	0.673932	5.63407
2	9.29	125	7	4.4	30.1	0.52	27	2	0	0.673932	2.90465
3	9.29	125	7	4.4	30.1	0.52	27	2	0	0.673932	1.63092
4	9.29	125	7	4.4	30.1	0.52	27	2	0	0.673932	5.79582
5	9.29	125	7	4.4	30.1	0.52	27	2	0	0.673932	5.94408
6	9.29	125	7	4.4	30.1	0.52	27	2	0	0.673932	7.97262
1	9.53	250	2.8	1.6	30.8	0.18	25	2	85.192	0.334107	0.668213
2	9.53	250	2.8	1.6	30.8	0.18	25	2	85.192	0.334107	0.898747
3	9.53	250	2.8	1.6	30.8	0.18	25	2	85.192	0.334107	0.902088
4	9.53	250	2.8	1.6	30.8	0.18	25	2	85.192	0.334107	0.588028
5	9.53	250	2.8	1.6	30.8	0.18	25	2	85.192	0.334107	0.477773
1	9.53	250	4.3	2.3	30.8	0.15	25	2	85.192	0.400232	0.800464
2	9.53	250	4.3	2.3	30.8	0.15	25	2	85.192	0.400232	1.07662
3	9.53	250	4.3	2.3	30.8	0.15	25	2	85.192	0.400232	1.08063
4	9.53	250	4.3	2.3	30.8	0.15	25	2	85.192	0.400232	0.704408
5	9.53	250	4.3	2.3	30.8	0.15	25	2	85.192	0.400232	0.572332
1	9.67	250	3.6	1.5	27.7	0.205	27	2	99.0385	0.140187	0.424766
2	9.67	250	3.6	1.5	27.7	0.205	27	2	99.0385	0.140187	0.508879
3	9.67	250	3.6	1.5	27.7	0.205	27	2	99.0385	0.140187	0.479439
4	9.67	250	3.6	1.5	27.7	0.205	27	2	99.0385	0.140187	0.428972
5	9.67	250	3.6	1.5	27.7	0.205	27	2	99.0385	0.140187	0.541121
6	9.67	250	3.6	1.5	27.7	0.205	27	2	99.0385	0.140187	0.560748
1	8.25	220	6.9	1.9	29.6	0.19	29	2	98.6056	0.196409	2.86168
2	8.25	220	6.9	1.9	29.6	0.19	29	2	98.6056	0.196409	2.14086
3	8.25	220	6.9	1.9	29.6	0.19	29	2	98.6056	0.196409	1.0449
4	8.25	220	6.9	1.9	29.6	0.19	29	2	98.6056	0.196409	1.21774
5	8.25	220	6.9	1.9	29.6	0.19	29	2	98.6056	0.196409	0.927051
6	8.25	220	6.9	1.9	29.6	0.19	29	2	98.6056	0.196409	0.925087
1	8.25	220	8.1	4	29	0.18	29	2	98.6056	0.39173	5.70751
2	8.25	220	8.1	4	29	0.18	29	2	98.6056	0.39173	4.26986
3	8.25	220	8.1	4	29	0.18	29	2	98.6056	0.39173	2.084
4	8.25	220	8.1	4	29	0.18	29	2	98.6056	0.39173	2.42873
5	8.25	220	8.1	4	29	0.18	29	2	98.6056	0.39173	1.84897
6	8.25	220	8.1	4	29	0.18	29	2	98.6056	0.39173	1.84505
1	11.26	250	5.7	2.7	28.6	0.309	29	2	95.3542	0.318837	0.153042
2	11.26	250	5.7	2.7	28.6	0.309	29	2	95.3542	0.318837	0.264634
3	11.26	250	5.7	2.7	28.6	0.309	29	2	95.3542	0.318837	0.188114
4	11.26	250	5.7	2.7	28.6	0.309	29	2	95.3542	0.318837	0.146665
5	11.26	250	5.7	2.7	28.6	0.309	29	2	95.3542	0.318837	0.248693
6	11.26	250	5.7	2.7	28.6	0.309	29	2	95.3542	0.318837	0.143477
1	9.75	235	4.2	1.1	34	0.11	42	2	91.4918	0.0484194	0.201909
2	9.75	235	4.2	1.1	34	0.11	42	2	91.4918	0.0484194	0.175278
3	9.75	235	4.2	1.1	34	0.11	42	2	91.4918	0.0484194	0.133637
4	9.75	235	4.2	1.1	34	0.11	42	2	91.4918	0.0484194	0.107975
5	9.75	235	4.2	1.1	34	0.11	42	2	91.4918	0.0484194	0.114754
6	9.75	235	4.2	1.1	34	0.11	42	2	91.4918	0.0484194	0.128796
1	9.75	235	2.5	1.5	34	0.26	42	2	91.4918	0.156062	0.65078
2	9.75	235	2.5	1.5	34	0.26	42	2	91.4918	0.156062	0.564946
3	9.75	235	2.5	1.5	34	0.26	42	2	91.4918	0.156062	0.430732
4	9.75	235	2.5	1.5	34	0.26	42	2	91.4918	0.156062	0.348019
5	9.75	235	2.5	1.5	34	0.26	42	2	91.4918	0.156062	0.369868
6	9.75	235	2.5	1.5	34	0.26	42	2	91.4918	0.156062	0.415126
1	8.55	220	6.6	4.5	30.2	0.22	29	2	58.8462	0.461538	0.756923
2	8.55	220	6.6	4.5	30.2	0.22	29	2	58.8462	0.461538	0.392308
3	8.55	220	6.6	4.5	30.2	0.22	29	2	58.8462	0.461538	0.249231
4	8.55	220	6.6	4.5	30.2	0.22	29	2	58.8462	0.461538	0.609231
5	8.55	220	6.6	4.5	30.2	0.22	29	2	58.8462	0.461538	0.590769
6	8.55	220	6.6	4.5	30.2	0.22	29	2	58.8462	0.461538	0.669231
1	9.65	250	0.7	0.2	35	0.092	31	2	97.3522	0.0148843	0.0258987
2	9.65	250	0.7	0.2	35	0.092	31	2	97.3522	0.0148843	0.0215823
3	9.65	250	0.7	0.2	35	0.092	31	2	97.3522	0.0148843	0.0253033
4	9.65	250	0.7	0.2	35	0.092	31	2	97.3522	0.0148843	0.0290244
5	9.65	250	0.7	0.2	35	0.092	31	2	97.3522	0.0148843	0.0339363
6	9.65	250	0.7	0.2	35	0.092	31	2	97.3522	0.0148843	0.0360201
1	9.65	250	1.9	1.2	36	0.276	29	2	97.3522	0.267918	0.466177
2	9.65	250	1.9	1.2	36	0.276	29	2	97.3522	0.267918	0.388481
3	9.65	250	1.9	1.2	36	0.276	29	2	97.3522	0.267918	0.45546
4	9.65	250	1.9	1.2	36	0.276	29	2	97.3522	0.267918	0.52244
5	9.65	250	1.9	1.2	36	0.276	29	2	97.3522	0.267918	0.610853
6	9.65	250	1.9	1.2	36	0.276	29	2	97.3522	0.267918	0.648361
1	9.79	250	4.7	1.6	29	0.21	35	2	0	0.930748	2.76432
2	9.79	250	4.7	1.6	29	0.21	35	2	0	0.930748	3.51823
3	9.79	250	4.7	1.6	29	0.21	35	2	0	0.930748	2.95047
4	9.79	250	4.7	1.6	29	0.21	35	2	0	0.930748	2.95047
5	9.79	250	4.7	1.6	29	0.21	35	2	0	0.930748	1.71258
6	9.79	250	4.7	1.6	29	0.21	35	2	0	0.930748	2.62471
1	8.55	250	3.7	1.4	26	0.13	25	2	77.2664	0.411765	1.33824
2	8.55	250	3.7	1.4	26	0.13	25	2	77.2664	0.411765	2.47471
3	8.55	250	3.7	1.4	26	0.13	25	2	77.2664	0.411765	2.36765
4	8.55	250	3.7	1.4	26	0.13	25	2	77.2664	0.411765	2.47471
5	8.55	250	3.7	1.4	26	0.13	25	2	77.2664	0.411765	2.41706
6	8.55	250	3.7	1.4	26	0.13	25	2	77.2664	0.411765	1.82412
1	8.2	300	4.2	2.5	30	0.17	27	2	92.9532	0.146451	0.270934
2	8.2	300	4.2	2.5	30	0.17	27	2	92.9532	0.146451	0.632667
3	8.2	300	4.2	2.5	30	0.17	27	2	92.9532	0.146451	0.702963
4	8.2	300	4.2	2.5	30	0.17	27	2	92.9532	0.146451	0.667815
5	8.2	300	4.2	2.5	30	0.17	27	2	92.9532	0.146451	0.492074
6	8.2	300	4.2	2.5	30	0.17	27	2	92.9532	0.146451	0.366127
1	8.2	300	2.7	2.3	29	0.16	27	2	92.9532	0.126809	0.234597
2	8.2	300	2.7	2.3	29	0.16	27	2	92.9532	0.126809	0.547815
3	8.2	300	2.7	2.3	29	0.16	27	2	92.9532	0.126809	0.608684
4	8.2	300	2.7	2.3	29	0.16	27	2	92.9532	0.126809	0.578249
5	8.2	300	2.7	2.3	29	0.16	27	2	92.9532	0.126809	0.426079
6	8.2	300	2.7	2.3	29	0.16	27	2	92.9532	0.126809	0.317023
1	7.89	225	3.6	1.5	27.5	0.162	27	2	97.137	0.12164	0.357621
2	7.89	225	3.6	1.5	27.5	0.162	27	2	97.137	0.12164	0.0377084
3	7.89	225	3.6	1.5	27.5	0.162	27	2	97.137	0.12164	0.018246
1	7.89	225	5.2	0.9	27.6	0.179	29	2	97.137	0.0806427	0.23709
2	7.89	225	5.2	0.9	27.6	0.179	29	2	97.137	0.0806427	0.0249992
3	7.89	225	5.2	0.9	27.6	0.179	29	2	97.137	0.0806427	0.0120964
1	10.16	250	4	1.1	43	0.18	25	2	92.0799	0.228374	0.312872
2	10.16	250	4	1.1	43	0.18	25	2	92.0799	0.228374	0.194118
3	10.16	250	4	1.1	43	0.18	25	2	92.0799	0.228374	0.127889
4	10.16	250	4	1.1	43	0.18	25	2	92.0799	0.228374	0.168997
5	10.16	250	4	1.1	43	0.18	25	2	92.0799	0.228374	0.290035
6	10.16	250	4	1.1	43	0.18	25	2	92.0799	0.228374	0.155294
1	10.16	250	3.7	2.3	30	0.27	25	2	92.0799	0.716263	0.98128
2	10.16	250	3.7	2.3	30	0.27	25	2	92.0799	0.716263	0.608824
3	10.16	250	3.7	2.3	30	0.27	25	2	92.0799	0.716263	0.401107
4	10.16	250	3.7	2.3	30	0.27	25	2	92.0799	0.716263	0.530035
5	10.16	250	3.7	2.3	30	0.27	25	2	92.0799	0.716263	0.909654
6	10.16	250	3.7	2.3	30	0.27	25	2	92.0799	0.716263	0.487059
1	10.16	250	5.6	1.5	30	0.032	27	2	92.0799	0.0553633	0.0758478
2	10.16	250	5.6	1.5	30	0.032	27	2	92.0799	0.0553633	0.0470588
3	10.16	250	5.6	1.5	30	0.032	27	2	92.0799	0.0553633	0.0310035
4	10.16	250	5.6	1.5	30	0.032	27	2	92.0799	0.0553633	0.0409689
5	10.16	250	5.6	1.5	30	0.032	27	2	92.0799	0.0553633	0.0703114
6	10.16	250	5.6	1.5	30	0.032	27	2	92.0799	0.0553633	0.0376471
1	8.55	250	4	2	33.3	0.26	45	2	95.6755	1	3.55
2	8.55	250	4	2	33.3	0.26	45	2	95.6755	1	1.59
3	8.55	250	4	2	33.3	0.26	45	2	95.6755	1	3.31
4	8.55	250	4	2	33.3	0.26	45	2	95.6755	1	2.05
5	8.55	250	4	2	33.3	0.26	45	2	95.6755	1	2.25
6	8.55	250	4	2	33.3	0.26	45	2	95.6755	1	1.25
1	9.91	200	6.2	1.2	29.6	0.19	23	2	88.4404	0.152406	0.0762032
2	9.91	200	6.2	1.2	29.6	0.19	23	2	88.4404	0.152406	0.0746791
3	9.91	200	6.2	1.2	29.6	0.19	23	2	88.4404	0.152406	0.071631
4	9.91	200	6.2	1.2	29.6	0.19	23	2	88.4404	0.152406	0.0746791
5	9.91	200	6.2	1.2	29.6	0.19	23	2	88.4404	0.152406	0.071631
6	9.91	200	6.2	1.2	29.6	0.19	23	2	88.4404	0.152406	0.0746791
1	8.05	140	5.1	1.5	29.1	0.13	23	2	94.3564	0.0920245	0.110429
2	8.05	140	5.1	1.5	29.1	0.13	23	2	94.3564	0.0920245	0.108589
3	8.05	140	5.1	1.5	29.1	0.13	23	2	94.3564	0.0920245	0.115951
4	8.05	140	5.1	1.5	29.1	0.13	23	2	94.3564	0.0920245	0.0395706
1	8.05	140	5.9	3.4	29.1	0.12	23	2	94.3564	0.192544	0.231052
2	8.05	140	5.9	3.4	29.1	0.12	23	2	94.3564	0.192544	0.227202
3	8.05	140	5.9	3.4	29.1	0.12	23	2	94.3564	0.192544	0.242605
4	8.05	140	5.9	3.4	29.1	0.12	23	2	94.3564	0.192544	0.0827938
1	10.42	150	3.1	2.1	28	0.323	23	2	97.1895	0.514214	0.149122
2	10.42	150	3.1	2.1	28	0.323	23	2	97.1895	0.514214	0.272534
3	10.42	150	3.1	2.1	28	0.323	23	2	97.1895	0.514214	0.236539
4	10.42	150	3.1	2.1	28	0.323	23	2	97.1895	0.514214	0.416514
5	10.42	150	3.1	2.1	28	0.323	23	2	97.1895	0.514214	0.509072
6	10.42	150	3.1	2.1	28	0.323	23	2	97.1895	0.514214	0.251965
1	10.42	150	3	1.4	28.5	0.201	25	2	97.1895	0.213327	0.0618649
2	10.42	150	3	1.4	28.5	0.201	25	2	97.1895	0.213327	0.113063
3	10.42	150	3	1.4	28.5	0.201	25	2	97.1895	0.213327	0.0981305
4	10.42	150	3	1.4	28.5	0.201	25	2	97.1895	0.213327	0.172795
5	10.42	150	3	1.4	28.5	0.201	25	2	97.1895	0.213327	0.211194
6	10.42	150	3	1.4	28.5	0.201	25	2	97.1895	0.213327	0.10453
1	10.96	175	6.4	1.9	27.8	0.12	27	2	90.3894	0.728435	0.866837
2	10.96	175	6.4	1.9	27.8	0.12	27	2	90.3894	0.728435	0.611885
3	10.96	175	6.4	1.9	27.8	0.12	27	2	90.3894	0.728435	0.415208
1	10.16	175	4.2	2	31	0.17	29	2	88.2494	0.118302	0.425887
2	10.16	175	4.2	2	31	0.17	29	2	88.2494	0.118302	0.317049
3	10.16	175	4.2	2	31	0.17	29	2	88.2494	0.118302	0.332429
4	10.16	175	4.2	2	31	0.17	29	2	88.2494	0.118302	0.331246
5	10.16	175	4.2	2	31	0.17	29	2	88.2494	0.118302	0.244885
6	10.16	175	4.2	2	31	0.17	29	2	88.2494	0.118302	0.181002
1	10.16	175	2.2	1.4	37	0.6	31	2	88.2494	0.292276	1.05219
2	10.16	175	2.2	1.4	37	0.6	31	2	88.2494	0.292276	0.783299
3	10.16	175	2.2	1.4	37	0.6	31	2	88.2494	0.292276	0.821294
4	10.16	175	2.2	1.4	37	0.6	31	2	88.2494	0.292276	0.818372
5	10.16	175	2.2	1.4	37	0.6	31	2	88.2494	0.292276	0.60501
6	10.16	175	2.2	1.4	37	0.6	31	2	88.2494	0.292276	0.447182
1	10.16	175	6.3	4.5	26	0.45	15	1	85.4577	0.241158	0.501608
2	10.16	175	6.3	4.5	26	0.45	15	1	85.4577	0.241158	0.834405
3	10.16	175	6.3	4.5	26	0.45	15	1	85.4577	0.241158	1.30225
4	10.16	175	6.3	4.5	26	0.45	15	1	85.4577	0.241158	1.25643
5	10.16	175	6.3	4.5	26	0.45	15	1	85.4577	0.241158	1.30466
6	10.16	175	6.3	4.5	26	0.45	15	1	85.4577	0.241158	1.27572
1	10.16	175	6.3	4.5	30	0.45	16	1	85.4577	0.241158	0.501608
2	10.16	175	6.3	4.5	30	0.45	16	1	85.4577	0.241158	0.834405
3	10.16	175	6.3	4.5	30	0.45	16	1	85.4577	0.241158	1.30225
4	10.16	175	6.3	4.5	30	0.45	16	1	85.4577	0.241158	1.25643
5	10.16	175	6.3	4.5	30	0.45	16	1	85.4577	0.241158	1.30466
6	10.16	175	6.3	4.5	30	0.45	16	1	85.4577	0.241158	1.27572
1	10.16	175	8.2	5.2	31	0.36	27	2	85.4577	0.222937	0.463708
2	10.16	175	8.2	5.2	31	0.36	27	2	85.4577	0.222937	0.771361
3	10.16	175	8.2	5.2	31	0.36	27	2	85.4577	0.222937	1.20386
4	10.16	175	8.2	5.2	31	0.36	27	2	85.4577	0.222937	1.1615
5	10.16	175	8.2	5.2	31	0.36	27	2	85.4577	0.222937	1.20609
6	10.16	175	8.2	5.2	31	0.36	27	2	85.4577	0.222937	1.17934
1	9.06	175	11	7.8	29.9	0.3	25	2	0	0.698925	1.6914
2	9.06	175	11	7.8	29.9	0.3	25	2	0	0.698925	3.24301
3	9.06	175	11	7.8	29.9	0.3	25	2	0	0.698925	3.24301
4	9.06	175	11	7.8	29.9	0.3	25	2	0	0.698925	3.20108
5	9.06	175	11	7.8	29.9	0.3	25	2	0	0.698925	2.52312
6	9.06	175	11	7.8	29.9	0.3	25	2	0	0.698925	2.39032
1	5.36	250	4.5	3.2	30.7	0.27	29	2	95.3704	0.580255	0.609268
2	5.36	250	4.5	3.2	30.7	0.27	29	2	95.3704	0.580255	0.499019
3	5.36	250	4.5	3.2	30.7	0.27	29	2	95.3704	0.580255	1.1257
4	5.36	250	4.5	3.2	30.7	0.27	29	2	95.3704	0.580255	1.32298
5	5.36	250	4.5	3.2	30.7	0.27	29	2	95.3704	0.580255	1.3752
6	5.36	250	4.5	3.2	30.7	0.27	29	2	95.3704	0.580255	1.39261
1	9.51	250	6.4	2.1	26.3	0.139	29	2	96.5986	0.111098	0.437728
2	9.51	250	6.4	2.1	26.3	0.139	29	2	96.5986	0.111098	0.591044
3	9.51	250	6.4	2.1	26.3	0.139	29	2	96.5986	0.111098	0.465502
4	9.51	250	6.4	2.1	26.3	0.139	29	2	96.5986	0.111098	0.384401
5	9.51	250	6.4	2.1	26.3	0.139	29	2	96.5986	0.111098	0.294411
1	9.35	250	1.5	0.7	29.3	0.477	23	1	0	0.0770544	0.335957
2	9.35	250	1.5	0.7	29.3	0.477	23	1	0	0.0770544	0.702736
3	9.35	250	1.5	0.7	29.3	0.477	23	1	0	0.0770544	0.687326
4	9.35	250	1.5	0.7	29.3	0.477	23	1	0	0.0770544	0.526282
5	9.35	250	1.5	0.7	29.3	0.477	23	1	0	0.0770544	0.399913
6	9.35	250	1.5	0.7	29.3	0.477	23	1	0	0.0770544	0.413782
1	9.35	250	1.2	0.9	27.6	0.288	23	1	0	0.0598158	0.260797
2	9.35	250	1.2	0.9	27.6	0.288	23	1	0	0.0598158	0.545521
3	9.35	250	1.2	0.9	27.6	0.288	23	1	0	0.0598158	0.533557
4	9.35	250	1.2	0.9	27.6	0.288	23	1	0	0.0598158	0.408542
5	9.35	250	1.2	0.9	27.6	0.288	23	1	0	0.0598158	0.310444
6	9.35	250	1.2	0.9	27.6	0.288	23	1	0	0.0598158	0.321211
1	11.64	250	4.1	2.7	30.4	0.451	25	2	81.4433	0.810018	5.90503
2	11.64	250	4.1	2.7	30.4	0.451	25	2	81.4433	0.810018	6.22094
3	11.64	250	4.1	2.7	30.4	0.451	25	2	81.4433	0.810018	5.38662
4	11.64	250	4.1	2.7	30.4	0.451	25	2	81.4433	0.810018	5.10311
5	11.64	250	4.1	2.7	30.4	0.451	25	2	81.4433	0.810018	3.64508
6	11.64	250	4.1	2.7	30.4	0.451	25	2	81.4433	0.810018	2.71356
1	11.64	250	4.1	2	27.9	0.167	25	2	98.9933	0.643545	3.37218
2	11.64	250	4.1	2	27.9	0.167	25	2	98.9933	0.643545	6.84089
3	11.64	250	4.1	2	27.9	0.167	25	2	98.9933	0.643545	6.79584
4	11.64	250	4.1	2	27.9	0.167	25	2	98.9933	0.643545	5.39934
5	11.64	250	4.1	2	27.9	0.167	25	2	98.9933	0.643545	4.29888
6	11.64	250	4.1	2	27.9	0.167	25	2	98.9933	0.643545	3.17911
1	11.16	125	4.7	2.3	32.7	0.828	25	2	90.5802	0.41162	0.481595
2	11.16	125	4.7	2.3	32.7	0.828	25	2	90.5802	0.41162	0.699754
3	11.16	125	4.7	2.3	32.7	0.828	25	2	90.5802	0.41162	0.358109
4	11.16	125	4.7	2.3	32.7	0.828	25	2	90.5802	0.41162	0.905563
5	11.16	125	4.7	2.3	32.7	0.828	25	2	90.5802	0.41162	1.10726
6	11.16	125	4.7	2.3	32.7	0.828	25	2	90.5802	0.41162	0.456898
1	11.59	200	5.4	3.5	29.4	0.366	27	1	90.4441	0.511398	2.50585
2	11.59	200	5.4	3.5	29.4	0.366	27	1	90.4441	0.511398	4.89919
3	11.59	200	5.4	3.5	29.4	0.366	27	1	90.4441	0.511398	3.13998
4	11.59	200	5.4	3.5	29.4	0.366	27	1	90.4441	0.511398	2.60301
5	11.59	200	5.4	3.5	29.4	0.366	27	1	90.4441	0.511398	2.72064
1	10.02	250	5	2.4	29.8	0.388	25	2	99.8586	0.292004	0.470126
2	10.02	250	5	2.4	29.8	0.388	25	2	99.8586	0.292004	0.297844
3	10.02	250	5	2.4	29.8	0.388	25	2	99.8586	0.292004	0.151842
4	10.02	250	5	2.4	29.8	0.388	25	2	99.8586	0.292004	0.119722
5	10.02	250	5	2.4	29.8	0.388	25	2	99.8586	0.292004	0.0613208
6	10.02	250	5	2.4	29.8	0.388	25	2	99.8586	0.292004	0.0671609
1	10.14	200	4.3	2.2	29.2	0.16	25	2	90.8534	0.416568	1.07475
2	10.14	200	4.3	2.2	29.2	0.16	25	2	90.8534	0.416568	1.32885
3	10.14	200	4.3	2.2	29.2	0.16	25	2	90.8534	0.416568	1.44133
4	10.14	200	4.3	2.2	29.2	0.16	25	2	90.8534	0.416568	1.34968
5	10.14	200	4.3	2.2	29.2	0.16	25	2	90.8534	0.416568	1.98286
6	10.14	200	4.3	2.2	29.2	0.16	25	2	90.8534	0.416568	1.88289
1	8.61	200	1.9	1.3	32	0.35	43	2	0	0.089391	0.249401
2	8.61	200	1.9	1.3	32	0.35	43	2	0	0.089391	0.116208
3	8.61	200	1.9	1.3	32	0.35	43	2	0	0.089391	0.11442
4	8.61	200	1.9	1.3	32	0.35	43	2	0	0.089391	0.111739
5	8.61	200	1.9	1.3	32	0.35	43	2	0	0.089391	0.0277112
6	8.61	200	1.9	1.3	32	0.35	43	2	0	0.089391	0.019666
1	8.61	200	1.9	1	31	0.21	45	2	0	0.0412574	0.115108
2	8.61	200	1.9	1	31	0.21	45	2	0	0.0412574	0.0536346
3	8.61	200	1.9	1	31	0.21	45	2	0	0.0412574	0.0528094
4	8.61	200	1.9	1	31	0.21	45	2	0	0.0412574	0.0515717
5	8.61	200	1.9	1	31	0.21	45	2	0	0.0412574	0.0127898
6	8.61	200	1.9	1	31	0.21	45	2	0	0.0412574	0.00907662
1	12.45	200	6	5.2	28.3	0.285	25	2	98.6575	0.93425	1.35466
2	12.45	200	6	5.2	28.3	0.285	25	2	98.6575	0.93425	1.48546
3	12.45	200	6	5.2	28.3	0.285	25	2	98.6575	0.93425	1.5602
4	12.45	200	6	5.2	28.3	0.285	25	2	98.6575	0.93425	0.943592
5	12.45	200	6	5.2	28.3	0.285	25	2	98.6575	0.93425	1.11176
6	12.45	200	6	5.2	28.3	0.285	25	2	98.6575	0.93425	0.794112
1	9.31	200	6.8	1.5	30.5	1	25	2	92.5072	0.93985	0.216165
2	9.31	200	6.8	1.5	30.5	1	25	2	92.5072	0.93985	0.300752
3	9.31	200	6.8	1.5	30.5	1	25	2	92.5072	0.93985	0.704887
1	10.86	100	6.9	2.8	31.6	0.717	13	2	91.3313	0.960344	2.60253
2	10.86	100	6.9	2.8	31.6	0.717	13	2	91.3313	0.960344	1.08519
3	10.86	100	6.9	2.8	31.6	0.717	13	2	91.3313	0.960344	0.710655
4	10.86	100	6.9	2.8	31.6	0.717	13	2	91.3313	0.960344	0.739465
5	10.86	100	6.9	2.8	31.6	0.717	13	2	91.3313	0.960344	0.134448
1	10.79	200	5.6	2.9	28.5	0.451	37	2	93.9876	0.763782	4.93403
2	10.79	200	5.6	2.9	28.5	0.451	37	2	93.9876	0.763782	3.81891
3	10.79	200	5.6	2.9	28.5	0.451	37	2	93.9876	0.763782	3.50576
4	10.79	200	5.6	2.9	28.5	0.451	37	2	93.9876	0.763782	4.45285
5	10.79	200	5.6	2.9	28.5	0.451	37	2	93.9876	0.763782	2.82599
6	10.79	200	5.6	2.9	28.5	0.451	37	2	93.9876	0.763782	3.46757
1	10.62	200	6.6	1	33	0.323	25	2	0	0.464548	0.14401
2	10.62	200	6.6	1	33	0.323	25	2	0	0.464548	0.106846
3	10.62	200	6.6	1	33	0.323	25	2	0	0.464548	0.148655
4	10.62	200	6.6	1	33	0.323	25	2	0	0.464548	0.283374
5	10.62	200	6.6	1	33	0.323	25	2	0	0.464548	0.227628
6	10.62	200	6.6	1	33	0.323	25	2	0	0.464548	0.255501
1	10.62	200	6.9	1.2	31	0.255	27	2	0	0.440098	0.13643
2	10.62	200	6.9	1.2	31	0.255	27	2	0	0.440098	0.101222
3	10.62	200	6.9	1.2	31	0.255	27	2	0	0.440098	0.140831
4	10.62	200	6.9	1.2	31	0.255	27	2	0	0.440098	0.26846
5	10.62	200	6.9	1.2	31	0.255	27	2	0	0.440098	0.215648
6	10.62	200	6.9	1.2	31	0.255	27	2	0	0.440098	0.242054
1	10.62	200	5.8	0.4	32	0.087	27	2	0	0.0500503	0.0155156
2	10.62	200	5.8	0.4	32	0.087	27	2	0	0.0500503	0.0115116
3	10.62	200	5.8	0.4	32	0.087	27	2	0	0.0500503	0.0160161
4	10.62	200	5.8	0.4	32	0.087	27	2	0	0.0500503	0.0305307
5	10.62	200	5.8	0.4	32	0.087	27	2	0	0.0500503	0.0245247
6	10.62	200	5.8	0.4	32	0.087	27	2	0	0.0500503	0.0275277
1	10.16	250	5.5	1.8	30.2	0.36	25	2	94.2605	0.396816	0.440465
2	10.16	250	5.5	1.8	30.2	0.36	25	2	94.2605	0.396816	0.607128
3	10.16	250	5.5	1.8	30.2	0.36	25	2	94.2605	0.396816	0.293644
1	10.14	250	6.4	1.6	27	0.208	25	2	98.4565	0.129797	0.122009
2	10.14	250	6.4	1.6	27	0.208	25	2	98.4565	0.129797	0.0960499
3	10.14	250	6.4	1.6	27	0.208	25	2	98.4565	0.129797	0.0350452
4	10.14	250	6.4	1.6	27	0.208	25	2	98.4565	0.129797	0.163544
5	10.14	250	6.4	1.6	27	0.208	25	2	98.4565	0.129797	0.094752
6	10.14	250	6.4	1.6	27	0.208	25	2	98.4565	0.129797	0.0337473
1	7.89	120	4.3	0.2	25.2	0.063	19	2	98.5984	0.0461877	0.0392595
2	7.89	120	4.3	0.2	25.2	0.063	19	2	98.5984	0.0461877	0.0752859
3	7.89	120	4.3	0.2	25.2	0.063	19	2	98.5984	0.0461877	0.0147801
4	7.89	120	4.3	0.2	25.2	0.063	19	2	98.5984	0.0461877	0.00138563
1	7.89	120	3.9	0.3	27	0.117	19	2	98.5984	0.128666	0.109366
2	7.89	120	3.9	0.3	27	0.117	19	2	98.5984	0.128666	0.209725
3	7.89	120	3.9	0.3	27	0.117	19	2	98.5984	0.128666	0.041173
4	7.89	120	3.9	0.3	27	0.117	19	2	98.5984	0.128666	0.00385997
1	8.93	150	4.4	1.5	28.3	0.286	25	2	95.8528	0.772138	1.67554
2	8.93	150	4.4	1.5	28.3	0.286	25	2	95.8528	0.772138	3.95335
3	8.93	150	4.4	1.5	28.3	0.286	25	2	95.8528	0.772138	4.25448
4	8.93	150	4.4	1.5	28.3	0.286	25	2	95.8528	0.772138	5.61344
5	8.93	150	4.4	1.5	28.3	0.286	25	2	95.8528	0.772138	5.48218
6	8.93	150	4.4	1.5	28.3	0.286	25	2	95.8528	0.772138	4.91852
1	8.93	150	4.1	1.5	21.1	0.022	23	2	95.8528	0.0593952	0.128888
2	8.93	150	4.1	1.5	21.1	0.022	23	2	95.8528	0.0593952	0.304104
3	8.93	150	4.1	1.5	21.1	0.022	23	2	95.8528	0.0593952	0.327268
4	8.93	150	4.1	1.5	21.1	0.022	23	2	95.8528	0.0593952	0.431803
5	8.93	150	4.1	1.5	21.1	0.022	23	2	95.8528	0.0593952	0.421706
6	8.93	150	4.1	1.5	21.1	0.022	23	2	95.8528	0.0593952	0.378348
1	11.8	150	3.5	1.4	24	0.267	25	2	86.7127	0.0841513	0.212903
2	11.8	150	3.5	1.4	24	0.267	25	2	86.7127	0.0841513	0.230575
3	11.8	150	3.5	1.4	24	0.267	25	2	86.7127	0.0841513	0.182608
4	11.8	150	3.5	1.4	24	0.267	25	2	86.7127	0.0841513	0.148106
5	11.8	150	3.5	1.4	24	0.267	25	2	86.7127	0.0841513	0.147265
6	11.8	150	3.5	1.4	24	0.267	25	2	86.7127	0.0841513	0.103506
1	11.8	150	4.1	1.2	32	0.206	23	2	86.7127	0.0556506	0.140796
2	11.8	150	4.1	1.2	32	0.206	23	2	86.7127	0.0556506	0.152483
3	11.8	150	4.1	1.2	32	0.206	23	2	86.7127	0.0556506	0.120762
4	11.8	150	4.1	1.2	32	0.206	23	2	86.7127	0.0556506	0.0979451
5	11.8	150	4.1	1.2	32	0.206	23	2	86.7127	0.0556506	0.0973886
6	11.8	150	4.1	1.2	32	0.206	23	2	86.7127	0.0556506	0.0684502
1	9.64	212	3.2	2.3	26.7	0.164	25.8	2	95.2273	0.182814	0.378425
2	9.64	212	3.2	2.3	26.7	0.164	25.8	2	95.2273	0.182814	0.758678
3	9.64	212	3.2	2.3	26.7	0.164	25.8	2	95.2273	0.182814	0.8446
4	9.64	212	3.2	2.3	26.7	0.164	25.8	2	95.2273	0.182814	0.680068
5	9.64	212	3.2	2.3	26.7	0.164	25.8	2	95.2273	0.182814	0.846429
6	9.64	212	3.2	2.3	26.7	0.164	25.8	2	95.2273	0.182814	0.714803
1	9.64	212	2.4	1.9	27.3	0.219	25	2	95.2273	0.201667	0.417451
2	9.64	212	2.4	1.9	27.3	0.219	25	2	95.2273	0.201667	0.836919
3	9.64	212	2.4	1.9	27.3	0.219	25	2	95.2273	0.201667	0.931703
4	9.64	212	2.4	1.9	27.3	0.219	25	2	95.2273	0.201667	0.750202
5	9.64	212	2.4	1.9	27.3	0.219	25	2	95.2273	0.201667	0.933719
6	9.64	212	2.4	1.9	27.3	0.219	25	2	95.2273	0.201667	0.788519
1	9.64	212	0.8	0.8	26.4	0.148	27	2	95.2273	0.0573838	0.118784
2	9.64	212	0.8	0.8	26.4	0.148	27	2	95.2273	0.0573838	0.238143
3	9.64	212	0.8	0.8	26.4	0.148	27	2	95.2273	0.0573838	0.265113
4	9.64	212	0.8	0.8	26.4	0.148	27	2	95.2273	0.0573838	0.213468
5	9.64	212	0.8	0.8	26.4	0.148	27	2	95.2273	0.0573838	0.265687
6	9.64	212	0.8	0.8	26.4	0.148	27	2	95.2273	0.0573838	0.224371
1	9.64	212	3.4	1.1	27.7	0.26	26	2	95.2273	0.138613	0.286929
2	9.64	212	3.4	1.1	27.7	0.26	26	2	95.2273	0.138613	0.575244
3	9.64	212	3.4	1.1	27.7	0.26	26	2	95.2273	0.138613	0.640392
4	9.64	212	3.4	1.1	27.7	0.26	26	2	95.2273	0.138613	0.51564
5	9.64	212	3.4	1.1	27.7	0.26	26	2	95.2273	0.138613	0.641778
6	9.64	212	3.4	1.1	27.7	0.26	26	2	95.2273	0.138613	0.541976
1	9.64	212	2.9	0.6	25.8	0.093	27	2	95.2273	0.0270441	0.0559812
2	9.64	212	2.9	0.6	25.8	0.093	27	2	95.2273	0.0270441	0.112233
3	9.64	212	2.9	0.6	25.8	0.093	27	2	95.2273	0.0270441	0.124944
4	9.64	212	2.9	0.6	25.8	0.093	27	2	95.2273	0.0270441	0.100604
5	9.64	212	2.9	0.6	25.8	0.093	27	2	95.2273	0.0270441	0.125214
6	9.64	212	2.9	0.6	25.8	0.093	27	2	95.2273	0.0270441	0.105742
1	9.52	212	1.7	0.2	25	0.063	49	2	98.2681	0.0474041	0.0611512
2	9.52	212	1.7	0.2	25	0.063	49	2	98.2681	0.0474041	0.070158
3	9.52	212	1.7	0.2	25	0.063	49	2	98.2681	0.0474041	0.0782167
4	9.52	212	1.7	0.2	25	0.063	49	2	98.2681	0.0474041	0.118036
5	9.52	212	1.7	0.2	25	0.063	49	2	98.2681	0.0474041	0.135102
6	9.52	212	1.7	0.2	25	0.063	49	2	98.2681	0.0474041	0.0677878
1	9.37	212	4.1	2.6	26.6	0.212	25	2	94.5639	0.294964	1.35684
2	9.37	212	4.1	2.6	26.6	0.212	25	2	94.5639	0.294964	0.861296
3	9.37	212	4.1	2.6	26.6	0.212	25	2	94.5639	0.294964	0.719713
4	9.37	212	4.1	2.6	26.6	0.212	25	2	94.5639	0.294964	0.554533
5	9.37	212	4.1	2.6	26.6	0.212	25	2	94.5639	0.294964	0.336259
6	9.37	212	4.1	2.6	26.6	0.212	25	2	94.5639	0.294964	0.283166
1	9.37	212	4.6	3	27	0.258	25	2	94.5639	0.414192	1.90528
2	9.37	212	4.6	3	27	0.258	25	2	94.5639	0.414192	1.20944
3	9.37	212	4.6	3	27	0.258	25	2	94.5639	0.414192	1.01063
4	9.37	212	4.6	3	27	0.258	25	2	94.5639	0.414192	0.77868
5	9.37	212	4.6	3	27	0.258	25	2	94.5639	0.414192	0.472179
6	9.37	212	4.6	3	27	0.258	25	2	94.5639	0.414192	0.397624
1	8.94	212	3.3	2.1	27.1	0.172	27	2	95.3119	0.171984	0.345687
2	8.94	212	3.3	2.1	27.1	0.172	27	2	95.3119	0.171984	0.378364
3	8.94	212	3.3	2.1	27.1	0.172	27	2	95.3119	0.171984	0.6329
4	8.94	212	3.3	2.1	27.1	0.172	27	2	95.3119	0.171984	0.436838
5	8.94	212	3.3	2.1	27.1	0.172	27	2	95.3119	0.171984	0.161665
6	8.94	212	3.3	2.1	27.1	0.172	27	2	95.3119	0.171984	0.0687934
1	8.94	212	5.1	4	28.2	0.266	25	2	95.3119	0.506618	1.0183
2	8.94	212	5.1	4	28.2	0.266	25	2	95.3119	0.506618	1.11456
3	8.94	212	5.1	4	28.2	0.266	25	2	95.3119	0.506618	1.86436
4	8.94	212	5.1	4	28.2	0.266	25	2	95.3119	0.506618	1.28681
5	8.94	212	5.1	4	28.2	0.266	25	2	95.3119	0.506618	0.476221
6	8.94	212	5.1	4	28.2	0.266	25	2	95.3119	0.506618	0.202647
1	8.94	212	4.5	1.1	26	0.112	27	2	95.3119	0.0586611	0.117909
2	8.94	212	4.5	1.1	26	0.112	27	2	95.3119	0.0586611	0.129054
3	8.94	212	4.5	1.1	26	0.112	27	2	95.3119	0.0586611	0.215873
4	8.94	212	4.5	1.1	26	0.112	27	2	95.3119	0.0586611	0.148999
5	8.94	212	4.5	1.1	26	0.112	27	2	95.3119	0.0586611	0.0551414
6	8.94	212	4.5	1.1	26	0.112	27	2	95.3119	0.0586611	0.0234644
1	9.22	212	7	5.6	39	0.298	23	2	84.8398	0.45956	1.44761
2	9.22	212	7	5.6	39	0.298	23	2	84.8398	0.45956	1.17188
3	9.22	212	7	5.6	39	0.298	23	2	84.8398	0.45956	0.831803
4	9.22	212	7	5.6	39	0.298	23	2	84.8398	0.45956	0.7307
5	9.22	212	7	5.6	39	0.298	23	2	84.8398	0.45956	0.34467
6	9.22	212	7	5.6	39	0.298	23	2	84.8398	0.45956	0.252758
1	9.22	212	3.8	2.1	27	0.229	25	2	84.8398	0.132432	0.417161
2	9.22	212	3.8	2.1	27	0.229	25	2	84.8398	0.132432	0.337701
3	9.22	212	3.8	2.1	27	0.229	25	2	84.8398	0.132432	0.239702
4	9.22	212	3.8	2.1	27	0.229	25	2	84.8398	0.132432	0.210567
5	9.22	212	3.8	2.1	27	0.229	25	2	84.8398	0.132432	0.0993239
6	9.22	212	3.8	2.1	27	0.229	25	2	84.8398	0.132432	0.0728376
1	9.22	212	2.1	1.4	32	0.157	25	2	84.8398	0.0605293	0.190667
2	9.22	212	2.1	1.4	32	0.157	25	2	84.8398	0.0605293	0.15435
3	9.22	212	2.1	1.4	32	0.157	25	2	84.8398	0.0605293	0.109558
4	9.22	212	2.1	1.4	32	0.157	25	2	84.8398	0.0605293	0.0962416
5	9.22	212	2.1	1.4	32	0.157	25	2	84.8398	0.0605293	0.045397
6	9.22	212	2.1	1.4	32	0.157	25	2	84.8398	0.0605293	0.0332911
1	9.22	212	2.8	2.5	32	0.31	23	2	84.8398	0.213422	0.67228
2	9.22	212	2.8	2.5	32	0.31	23	2	84.8398	0.213422	0.544227
3	9.22	212	2.8	2.5	32	0.31	23	2	84.8398	0.213422	0.386294
4	9.22	212	2.8	2.5	32	0.31	23	2	84.8398	0.213422	0.339341
5	9.22	212	2.8	2.5	32	0.31	23	2	84.8398	0.213422	0.160067
6	9.22	212	2.8	2.5	32	0.31	23	2	84.8398	0.213422	0.117382
1	9.44	212	4.2	0.7	26	0.099	29	2	94.6975	0.0788665	0.0654592
2	9.44	212	4.2	0.7	26	0.099	29	2	94.6975	0.0788665	0.0552066
3	9.44	212	4.2	0.7	26	0.099	29	2	94.6975	0.0788665	0.0481086
4	9.44	212	4.2	0.7	26	0.099	29	2	94.6975	0.0788665	0.0386446
5	9.44	212	4.2	0.7	26	0.099	29	2	94.6975	0.0788665	0.0867532
6	9.44	212	4.2	0.7	26	0.099	29	2	94.6975	0.0788665	0.0228713
1	9.44	212	4.8	1.7	27.8	0.302	29	2	94.6975	0.584272	0.484946
2	9.44	212	4.8	1.7	27.8	0.302	29	2	94.6975	0.584272	0.408991
3	9.44	212	4.8	1.7	27.8	0.302	29	2	94.6975	0.584272	0.356406
4	9.44	212	4.8	1.7	27.8	0.302	29	2	94.6975	0.584272	0.286293
5	9.44	212	4.8	1.7	27.8	0.302	29	2	94.6975	0.584272	0.642699
6	9.44	212	4.8	1.7	27.8	0.302	29	2	94.6975	0.584272	0.169439
1	9.52	300	3.9	2.2	26	0.203	25	2	95.0676	0.451659	1.31433
2	9.52	300	3.9	2.2	26	0.203	25	2	95.0676	0.451659	2.6151
3	9.52	300	3.9	2.2	26	0.203	25	2	95.0676	0.451659	2.71447
4	9.52	300	3.9	2.2	26	0.203	25	2	95.0676	0.451659	3.01256
5	9.52	300	3.9	2.2	26	0.203	25	2	95.0676	0.451659	1.50402
6	9.52	300	3.9	2.2	26	0.203	25	2	95.0676	0.451659	1.14721
1	9.52	300	3.2	1.1	32	0.238	25	2	95.0676	0.264765	0.770467
2	9.52	300	3.2	1.1	32	0.238	25	2	95.0676	0.264765	1.53299
3	9.52	300	3.2	1.1	32	0.238	25	2	95.0676	0.264765	1.59124
4	9.52	300	3.2	1.1	32	0.238	25	2	95.0676	0.264765	1.76599
5	9.52	300	3.2	1.1	32	0.238	25	2	95.0676	0.264765	0.881669
6	9.52	300	3.2	1.1	32	0.238	25	2	95.0676	0.264765	0.672504
1	8.93	150	7.4	2.4	28.3	0.287	23	2	95.841	0.316559	1.8582
2	8.93	150	7.4	2.4	28.3	0.287	23	2	95.841	0.316559	0.902192
3	8.93	150	7.4	2.4	28.3	0.287	23	2	95.841	0.316559	0.747078
4	8.93	150	7.4	2.4	28.3	0.287	23	2	95.841	0.316559	0.693263
5	8.93	150	7.4	2.4	28.3	0.287	23	2	95.841	0.316559	0.367208
6	8.93	150	7.4	2.4	28.3	0.287	23	2	95.841	0.316559	0.424189
1	8.93	150	4.2	1.9	28.8	0.416	23	2	95.841	0.363252	2.13229
2	8.93	150	4.2	1.9	28.8	0.416	23	2	95.841	0.363252	1.03527
3	8.93	150	4.2	1.9	28.8	0.416	23	2	95.841	0.363252	0.857275
4	8.93	150	4.2	1.9	28.8	0.416	23	2	95.841	0.363252	0.795522
5	8.93	150	4.2	1.9	28.8	0.416	23	2	95.841	0.363252	0.421372
6	8.93	150	4.2	1.9	28.8	0.416	23	2	95.841	0.363252	0.486758
1	8.93	150	4.5	2.3	28	0.452	23	2	96.2089	0.575509	1.08771
2	8.93	150	4.5	2.3	28	0.452	23	2	96.2089	0.575509	1.17979
3	8.93	150	4.5	2.3	28	0.452	23	2	96.2089	0.575509	2.44016
4	8.93	150	4.5	2.3	28	0.452	23	2	96.2089	0.575509	1.59416
5	8.93	150	4.5	2.3	28	0.452	23	2	96.2089	0.575509	1.81861
6	8.93	150	4.5	2.3	28	0.452	23	2	96.2089	0.575509	1.27763
1	9.03	212	3.1	1.6	27.4	0.113	25	2	97.0914	0.356326	0.456098
2	9.03	212	3.1	1.6	27.4	0.113	25	2	97.0914	0.356326	0.552306
3	9.03	212	3.1	1.6	27.4	0.113	25	2	97.0914	0.356326	0.912196
4	9.03	212	3.1	1.6	27.4	0.113	25	2	97.0914	0.356326	1.25071
5	9.03	212	3.1	1.6	27.4	0.113	25	2	97.0914	0.356326	2.05957
6	9.03	212	3.1	1.6	27.4	0.113	25	2	97.0914	0.356326	2.2021
1	9.03	212	4.2	1.4	27.4	0.137	25	2	97.0914	0.378006	0.483847
2	9.03	212	4.2	1.4	27.4	0.137	25	2	97.0914	0.378006	0.585909
3	9.03	212	4.2	1.4	27.4	0.137	25	2	97.0914	0.378006	0.967694
4	9.03	212	4.2	1.4	27.4	0.137	25	2	97.0914	0.378006	1.3268
5	9.03	212	4.2	1.4	27.4	0.137	25	2	97.0914	0.378006	2.18487
6	9.03	212	4.2	1.4	27.4	0.137	25	2	97.0914	0.378006	2.33607
1	9.37	212	1.5	1.1	27.1	0.111	27	2	91.6015	0.152377	0.728364
2	9.37	212	1.5	1.1	27.1	0.111	27	2	91.6015	0.152377	0.743602
3	9.37	212	1.5	1.1	27.1	0.111	27	2	91.6015	0.152377	0.632366
4	9.37	212	1.5	1.1	27.1	0.111	27	2	91.6015	0.152377	0.635414
5	9.37	212	1.5	1.1	27.1	0.111	27	2	91.6015	0.152377	0.519607
6	9.37	212	1.5	1.1	27.1	0.111	27	2	91.6015	0.152377	0.457132
1	9.37	212	1.6	1.3	27.1	0.112	27	2	91.6015	0.181705	0.868549
2	9.37	212	1.6	1.3	27.1	0.112	27	2	91.6015	0.181705	0.886719
3	9.37	212	1.6	1.3	27.1	0.112	27	2	91.6015	0.181705	0.754075
4	9.37	212	1.6	1.3	27.1	0.112	27	2	91.6015	0.181705	0.757709
5	9.37	212	1.6	1.3	27.1	0.112	27	2	91.6015	0.181705	0.619613
6	9.37	212	1.6	1.3	27.1	0.112	27	2	91.6015	0.181705	0.545114
1	9.37	212	3.4	1.6	27.9	0.233	25	2	91.6015	0.465244	2.22387
2	9.37	212	3.4	1.6	27.9	0.233	25	2	91.6015	0.465244	2.27039
3	9.37	212	3.4	1.6	27.9	0.233	25	2	91.6015	0.465244	1.93076
4	9.37	212	3.4	1.6	27.9	0.233	25	2	91.6015	0.465244	1.94007
5	9.37	212	3.4	1.6	27.9	0.233	25	2	91.6015	0.465244	1.58648
6	9.37	212	3.4	1.6	27.9	0.233	25	2	91.6015	0.465244	1.39573
1	10.96	212	1.9	0.5	29	0.205	25	2	0	0.094531	0.559624
2	10.96	212	1.9	0.5	29	0.205	25	2	0	0.094531	0.491561
3	10.96	212	1.9	0.5	29	0.205	25	2	0	0.094531	0.703311
4	10.96	212	1.9	0.5	29	0.205	25	2	0	0.094531	0.749631
5	10.96	212	1.9	0.5	29	0.205	25	2	0	0.094531	0.730725
1	9.87	212	3.3	1.2	26.3	0.13	29	2	95.4998	0.162924	0.360063
2	9.87	212	3.3	1.2	26.3	0.13	29	2	95.4998	0.162924	0.234611
3	9.87	212	3.3	1.2	26.3	0.13	29	2	95.4998	0.162924	0.174329
4	9.87	212	3.3	1.2	26.3	0.13	29	2	95.4998	0.162924	0.0961253
5	9.87	212	3.3	1.2	26.3	0.13	29	2	95.4998	0.162924	0.101013
6	9.87	212	3.3	1.2	26.3	0.13	29	2	95.4998	0.162924	0.177587
1	10.96	212	0.7	0.3	38	0.08	25	2	0	0.0221341	0.131034
2	10.96	212	0.7	0.3	38	0.08	25	2	0	0.0221341	0.115097
3	10.96	212	0.7	0.3	38	0.08	25	2	0	0.0221341	0
4	10.96	212	0.7	0.3	38	0.08	25	2	0	0.0221341	0.164678
5	10.96	212	0.7	0.3	38	0.08	25	2	0	0.0221341	0.175523
6	10.96	212	0.7	0.3	38	0.08	25	2	0	0.0221341	0.171097
1	9.87	212	7	3.5	27.2	0.229	27	2	95.4998	0.837076	1.84994
2	9.87	212	7	3.5	27.2	0.229	27	2	95.4998	0.837076	1.20539
3	9.87	212	7	3.5	27.2	0.229	27	2	95.4998	0.837076	0.895671
4	9.87	212	7	3.5	27.2	0.229	27	2	95.4998	0.837076	0.493875
5	9.87	212	7	3.5	27.2	0.229	27	2	95.4998	0.837076	0.518987
6	9.87	212	7	3.5	27.2	0.229	27	2	95.4998	0.837076	0.912413
1	9.87	212	5.3	2.1	26.6	0.227	27	2	95.5253	0.289242	1.92635
2	9.87	212	5.3	2.1	26.6	0.227	27	2	95.5253	0.289242	1.60529
3	9.87	212	5.3	2.1	26.6	0.227	27	2	95.5253	0.289242	1.05573
4	9.87	212	5.3	2.1	26.6	0.227	27	2	95.5253	0.289242	0.500389
5	9.87	212	5.3	2.1	26.6	0.227	27	2	95.5253	0.289242	0.338413
6	9.87	212	5.3	2.1	26.6	0.227	27	2	95.5253	0.289242	0.402047
1	9.87	212	4.8	2.8	26.5	0.259	27	2	95.5253	0.440022	2.93055
2	9.87	212	4.8	2.8	26.5	0.259	27	2	95.5253	0.440022	2.44212
3	9.87	212	4.8	2.8	26.5	0.259	27	2	95.5253	0.440022	1.60608
4	9.87	212	4.8	2.8	26.5	0.259	27	2	95.5253	0.440022	0.761238
5	9.87	212	4.8	2.8	26.5	0.259	27	2	95.5253	0.440022	0.514826
6	9.87	212	4.8	2.8	26.5	0.259	27	2	95.5253	0.440022	0.61163
1	8.93	150	4.2	1.2	26.2	0.124	25	2	95.9796	0.132044	0.429142
2	8.93	150	4.2	1.2	26.2	0.124	25	2	95.9796	0.132044	0.479318
3	8.93	150	4.2	1.2	26.2	0.124	25	2	95.9796	0.132044	0.365761
4	8.93	150	4.2	1.2	26.2	0.124	25	2	95.9796	0.132044	0.24164
5	8.93	150	4.2	1.2	26.2	0.124	25	2	95.9796	0.132044	0.322187
6	8.93	150	4.2	1.2	26.2	0.124	25	2	95.9796	0.132044	0.377645
1	9.17	150	2	0.7	32	0.154	29	2	96.548	0.180268	0.0739097
2	9.17	150	2	0.7	32	0.154	29	2	96.548	0.180268	0.17486
3	9.17	150	2	0.7	32	0.154	29	2	96.548	0.180268	0.0883311
4	9.17	150	2	0.7	32	0.154	29	2	96.548	0.180268	0.124385
5	9.17	150	2	0.7	32	0.154	29	2	96.548	0.180268	0.117174
6	9.17	150	2	0.7	32	0.154	29	2	96.548	0.180268	0.254177
1	9.17	150	2.5	1.5	28	0.306	27	2	96.548	0.767559	0.314699
2	9.17	150	2.5	1.5	28	0.306	27	2	96.548	0.767559	0.744532
3	9.17	150	2.5	1.5	28	0.306	27	2	96.548	0.767559	0.376104
4	9.17	150	2.5	1.5	28	0.306	27	2	96.548	0.767559	0.529615
5	9.17	150	2.5	1.5	28	0.306	27	2	96.548	0.767559	0.498913
6	9.17	150	2.5	1.5	28	0.306	27	2	96.548	0.767559	1.08226
1	8.93	150	4.6	0.8	26	0.104	25	2	95.9796	0.0738309	0.23995
2	8.93	150	4.6	0.8	26	0.104	25	2	95.9796	0.0738309	0.268006
3	8.93	150	4.6	0.8	26	0.104	25	2	95.9796	0.0738309	0.204511
4	8.93	150	4.6	0.8	26	0.104	25	2	95.9796	0.0738309	0.13511
5	8.93	150	4.6	0.8	26	0.104	25	2	95.9796	0.0738309	0.180147
6	8.93	150	4.6	0.8	26	0.104	25	2	95.9796	0.0738309	0.211156
1	9.17	150	0.7	0.3	28	0.104	31	2	96.548	0.0521739	0.0213913
2	9.17	150	0.7	0.3	28	0.104	31	2	96.548	0.0521739	0.0506087
3	9.17	150	0.7	0.3	28	0.104	31	2	96.548	0.0521739	0.0255652
4	9.17	150	0.7	0.3	28	0.104	31	2	96.548	0.0521739	0.036
5	9.17	150	0.7	0.3	28	0.104	31	2	96.548	0.0521739	0.033913
6	9.17	150	0.7	0.3	28	0.104	31	2	96.548	0.0521739	0.0735652
1	6.44	150	6.5	3.2	27.4	0.247	23	2	88.5238	0.605114	4.68963
2	6.44	150	6.5	3.2	27.4	0.247	23	2	88.5238	0.605114	4.43549
3	6.44	150	6.5	3.2	27.4	0.247	23	2	88.5238	0.605114	3.90904
4	6.44	150	6.5	3.2	27.4	0.247	23	2	88.5238	0.605114	3.21921
5	6.44	150	6.5	3.2	27.4	0.247	23	2	88.5238	0.605114	2.51122
6	6.44	150	6.5	3.2	27.4	0.247	23	2	88.5238	0.605114	4.03611
1	6.44	150	7.3	2.5	22.3	0.136	25	2	88.5238	0.260297	2.0173
2	6.44	150	7.3	2.5	22.3	0.136	25	2	88.5238	0.260297	1.90798
3	6.44	150	7.3	2.5	22.3	0.136	25	2	88.5238	0.260297	1.68152
4	6.44	150	7.3	2.5	22.3	0.136	25	2	88.5238	0.260297	1.38478
5	6.44	150	7.3	2.5	22.3	0.136	25	2	88.5238	0.260297	1.08023
6	6.44	150	7.3	2.5	22.3	0.136	25	2	88.5238	0.260297	1.73618
1	6.44	150	3.8	1.2	27.3	0.131	25	2	88.5238	0.120349	0.932706
2	6.44	150	3.8	1.2	27.3	0.131	25	2	88.5238	0.120349	0.882159
3	6.44	150	3.8	1.2	27.3	0.131	25	2	88.5238	0.120349	0.777455
4	6.44	150	3.8	1.2	27.3	0.131	25	2	88.5238	0.120349	0.640257
5	6.44	150	3.8	1.2	27.3	0.131	25	2	88.5238	0.120349	0.499449
6	6.44	150	3.8	1.2	27.3	0.131	25	2	88.5238	0.120349	0.802729
1	12.23	150	5.5	2.4	27.7	0.305	25	2	87.027	0.481769	0.467316
2	12.23	150	5.5	2.4	27.7	0.305	25	2	87.027	0.481769	0.529946
3	12.23	150	5.5	2.4	27.7	0.305	25	2	87.027	0.481769	0.573305
4	12.23	150	5.5	2.4	27.7	0.305	25	2	87.027	0.481769	0.361327
5	12.23	150	5.5	2.4	27.7	0.305	25	2	87.027	0.481769	0.544399
6	12.23	150	5.5	2.4	27.7	0.305	25	2	87.027	0.481769	0.953903
1	12.23	150	3	1.4	27.4	0.214	25	2	87.027	0.197183	0.191268
2	12.23	150	3	1.4	27.4	0.214	25	2	87.027	0.197183	0.216901
3	12.23	150	3	1.4	27.4	0.214	25	2	87.027	0.197183	0.234648
4	12.23	150	3	1.4	27.4	0.214	25	2	87.027	0.197183	0.147887
5	12.23	150	3	1.4	27.4	0.214	25	2	87.027	0.197183	0.222817
6	12.23	150	3	1.4	27.4	0.214	25	2	87.027	0.197183	0.390423
1	12.23	150	5	1.3	28.7	0.32	25	2	96.6597	0.16806	0.154616
2	12.23	150	5	1.3	28.7	0.32	25	2	96.6597	0.16806	0.141171
3	12.23	150	5	1.3	28.7	0.32	25	2	96.6597	0.16806	0.147893
4	12.23	150	5	1.3	28.7	0.32	25	2	96.6597	0.16806	0.152935
5	12.23	150	5	1.3	28.7	0.32	25	2	96.6597	0.16806	0.0857108
6	12.23	150	5	1.3	28.7	0.32	25	2	96.6597	0.16806	0.107559
1	9.87	212	5.3	1.3	27.7	0.3	29	2	94.5022	0.419626	3.07586
2	9.87	212	5.3	1.3	27.7	0.3	29	2	94.5022	0.419626	3.78083
3	9.87	212	5.3	1.3	27.7	0.3	29	2	94.5022	0.419626	3.52066
4	9.87	212	5.3	1.3	27.7	0.3	29	2	94.5022	0.419626	3.09264
5	9.87	212	5.3	1.3	27.7	0.3	29	2	94.5022	0.419626	1.31343
6	9.87	212	5.3	1.3	27.7	0.3	29	2	94.5022	0.419626	0.23499
1	9.87	212	5.1	1.9	27.3	0.158	29	2	94.5022	0.323004	2.36762
2	9.87	212	5.1	1.9	27.3	0.158	29	2	94.5022	0.323004	2.91027
3	9.87	212	5.1	1.9	27.3	0.158	29	2	94.5022	0.323004	2.71
4	9.87	212	5.1	1.9	27.3	0.158	29	2	94.5022	0.323004	2.38054
5	9.87	212	5.1	1.9	27.3	0.158	29	2	94.5022	0.323004	1.011
6	9.87	212	5.1	1.9	27.3	0.158	29	2	94.5022	0.323004	0.180882
1	10.55	150	5.4	1.9	27.7	0.157	35	1	98.0482	0.218359	0.43235
2	10.55	150	5.4	1.9	27.7	0.157	35	1	98.0482	0.218359	0.631057
3	10.55	150	5.4	1.9	27.7	0.157	35	1	98.0482	0.218359	1.05686
4	10.55	150	5.4	1.9	27.7	0.157	35	1	98.0482	0.218359	0.777357
5	10.55	150	5.4	1.9	27.7	0.157	35	1	98.0482	0.218359	0.77299
6	10.55	150	5.4	1.9	27.7	0.157	35	1	98.0482	0.218359	0.873435
1	10.55	150	3	1.4	26.8	0.102	35	1	98.0482	0.104531	0.206972
2	10.55	150	3	1.4	26.8	0.102	35	1	98.0482	0.104531	0.302095
3	10.55	150	3	1.4	26.8	0.102	35	1	98.0482	0.104531	0.505931
4	10.55	150	3	1.4	26.8	0.102	35	1	98.0482	0.104531	0.372131
5	10.55	150	3	1.4	26.8	0.102	35	1	98.0482	0.104531	0.37004
6	10.55	150	3	1.4	26.8	0.102	35	1	98.0482	0.104531	0.418125
1	9.6	150	2.6	1.6	29	0.291	25	2	97.1168	0.428453	0.736939
2	9.6	150	2.6	1.6	29	0.291	25	2	97.1168	0.428453	0.638395
3	9.6	150	2.6	1.6	29	0.291	25	2	97.1168	0.428453	0.372754
4	9.6	150	2.6	1.6	29	0.291	25	2	97.1168	0.428453	0.248503
5	9.6	150	2.6	1.6	29	0.291	25	2	97.1168	0.428453	0.22708
6	9.6	150	2.6	1.6	29	0.291	25	2	97.1168	0.428453	0.111398
1	9.6	150	2.9	1.3	27	0.287	25	2	97.1168	0.343333	0.590533
2	9.6	150	2.9	1.3	27	0.287	25	2	97.1168	0.343333	0.511566
3	9.6	150	2.9	1.3	27	0.287	25	2	97.1168	0.343333	0.2987
4	9.6	150	2.9	1.3	27	0.287	25	2	97.1168	0.343333	0.199133
5	9.6	150	2.9	1.3	27	0.287	25	2	97.1168	0.343333	0.181967
6	9.6	150	2.9	1.3	27	0.287	25	2	97.1168	0.343333	0.0892666
1	9.6	150	5.3	1	29	0.075	27	2	97.1168	0.0690163	0.118708
2	9.6	150	5.3	1	29	0.075	27	2	97.1168	0.0690163	0.102834
3	9.6	150	5.3	1	29	0.075	27	2	97.1168	0.0690163	0.0600442
4	9.6	150	5.3	1	29	0.075	27	2	97.1168	0.0690163	0.0400294
5	9.6	150	5.3	1	29	0.075	27	2	97.1168	0.0690163	0.0365786
6	9.6	150	5.3	1	29	0.075	27	2	97.1168	0.0690163	0.0179442
1	9.6	150	4.3	1	28	0.173	27	2	97.1168	0.159198	0.27382
2	9.6	150	4.3	1	28	0.173	27	2	97.1168	0.159198	0.237204
3	9.6	150	4.3	1	28	0.173	27	2	97.1168	0.159198	0.138502
4	9.6	150	4.3	1	28	0.173	27	2	97.1168	0.159198	0.0923346
5	9.6	150	4.3	1	28	0.173	27	2	97.1168	0.159198	0.0843747
6	9.6	150	4.3	1	28	0.173	27	2	97.1168	0.159198	0.0413914
1	8.72	212	3.3	2	28.8	0.208	25	2	95.2888	0.273235	1.27874
2	8.72	212	3.3	2	28.8	0.208	25	2	95.2888	0.273235	0.833366
3	8.72	212	3.3	2	28.8	0.208	25	2	95.2888	0.273235	1.3935
4	8.72	212	3.3	2	28.8	0.208	25	2	95.2888	0.273235	1.68586
5	8.72	212	3.3	2	28.8	0.208	25	2	95.2888	0.273235	1.81155
6	8.72	212	3.3	2	28.8	0.208	25	2	95.2888	0.273235	1.46727
1	8.72	212	4.4	1.3	28.1	0.221	25	2	95.2888	0.188703	0.883129
2	8.72	212	4.4	1.3	28.1	0.221	25	2	95.2888	0.188703	0.575544
3	8.72	212	4.4	1.3	28.1	0.221	25	2	95.2888	0.188703	0.962384
4	8.72	212	4.4	1.3	28.1	0.221	25	2	95.2888	0.188703	1.1643
5	8.72	212	4.4	1.3	28.1	0.221	25	2	95.2888	0.188703	1.2511
6	8.72	212	4.4	1.3	28.1	0.221	25	2	95.2888	0.188703	1.01333
1	9.57	150	4.9	0.2	25.1	0.062	25	2	95.2848	0.0164478	0.0524685
2	9.57	150	4.9	0.2	25.1	0.062	25	2	95.2848	0.0164478	0.0235204
3	9.57	150	4.9	0.2	25.1	0.062	25	2	95.2848	0.0164478	0.0215466
4	9.57	150	4.9	0.2	25.1	0.062	25	2	95.2848	0.0164478	0.0143096
5	9.57	150	4.9	0.2	25.1	0.062	25	2	95.2848	0.0164478	0.0120069
6	9.57	150	4.9	0.2	25.1	0.062	25	2	95.2848	0.0164478	0.0205598
1	9.57	150	6.3	0.8	26.8	0.161	25	2	95.2848	0.170845	0.544995
2	9.57	150	6.3	0.8	26.8	0.161	25	2	95.2848	0.170845	0.244308
3	9.57	150	6.3	0.8	26.8	0.161	25	2	95.2848	0.170845	0.223807
4	9.57	150	6.3	0.8	26.8	0.161	25	2	95.2848	0.170845	0.148635
5	9.57	150	6.3	0.8	26.8	0.161	25	2	95.2848	0.170845	0.124717
6	9.57	150	6.3	0.8	26.8	0.161	25	2	95.2848	0.170845	0.213556
1	8.72	212	3.3	0.5	25.8	0.101	25	2	97.8424	0.0980773	0.255982
2	8.72	212	3.3	0.5	25.8	0.101	25	2	97.8424	0.0980773	0.247155
3	8.72	212	3.3	0.5	25.8	0.101	25	2	97.8424	0.0980773	0.0539425
4	8.72	212	3.3	0.5	25.8	0.101	25	2	97.8424	0.0980773	0.0147116
5	8.72	212	3.3	0.5	25.8	0.101	25	2	97.8424	0.0980773	0.00784618
6	8.72	212	3.3	0.5	25.8	0.101	25	2	97.8424	0.0980773	0.0362886
1	10.15	212	3.4	0.8	26.1	0.063	45	1	92.3472	0.0876369	0.0350548
2	10.15	212	3.4	0.8	26.1	0.063	45	1	92.3472	0.0876369	0.181408
3	10.15	212	3.4	0.8	26.1	0.063	45	1	92.3472	0.0876369	0.263787
4	10.15	212	3.4	0.8	26.1	0.063	45	1	92.3472	0.0876369	0.532833
5	10.15	212	3.4	0.8	26.1	0.063	45	1	92.3472	0.0876369	0.396119
6	10.15	212	3.4	0.8	26.1	0.063	45	1	92.3472	0.0876369	0.405759
1	10.15	212	3.3	1.6	27.5	0.294	45	1	92.3472	0.817945	0.327178
2	10.15	212	3.3	1.6	27.5	0.294	45	1	92.3472	0.817945	1.69315
3	10.15	212	3.3	1.6	27.5	0.294	45	1	92.3472	0.817945	2.46201
4	10.15	212	3.3	1.6	27.5	0.294	45	1	92.3472	0.817945	4.9731
5	10.15	212	3.3	1.6	27.5	0.294	45	1	92.3472	0.817945	3.69711
6	10.15	212	3.3	1.6	27.5	0.294	45	1	92.3472	0.817945	3.78708
1	11.06	150	1.4	0.2	23.9	0.062	25	2	91.8675	0.0219547	0.0155878
2	11.06	150	1.4	0.2	23.9	0.062	25	2	91.8675	0.0219547	0.0360057
3	11.06	150	1.4	0.2	23.9	0.062	25	2	91.8675	0.0219547	0.0241501
4	11.06	150	1.4	0.2	23.9	0.062	25	2	91.8675	0.0219547	0.0191006
5	11.06	150	1.4	0.2	23.9	0.062	25	2	91.8675	0.0219547	0.0142705
6	11.06	150	1.4	0.2	23.9	0.062	25	2	91.8675	0.0219547	0.0221742
1	8.93	150	4.5	0.8	25.5	0.06	25	2	94.1306	0.0734169	0.679841
2	8.93	150	4.5	0.8	25.5	0.06	25	2	94.1306	0.0734169	0.622576
3	8.93	150	4.5	0.8	25.5	0.06	25	2	94.1306	0.0734169	0.651208
4	8.93	150	4.5	0.8	25.5	0.06	25	2	94.1306	0.0734169	0.637259
5	8.93	150	4.5	0.8	25.5	0.06	25	2	94.1306	0.0734169	0.494096
6	8.93	150	4.5	0.8	25.5	0.06	25	2	94.1306	0.0734169	0.379566
1	8.93	150	4.9	0.3	25.7	0.08	25	2	94.1306	0.0367085	0.33992
2	8.93	150	4.9	0.3	25.7	0.08	25	2	94.1306	0.0367085	0.311288
3	8.93	150	4.9	0.3	25.7	0.08	25	2	94.1306	0.0367085	0.325604
4	8.93	150	4.9	0.3	25.7	0.08	25	2	94.1306	0.0367085	0.31863
5	8.93	150	4.9	0.3	25.7	0.08	25	2	94.1306	0.0367085	0.247048
6	8.93	150	4.9	0.3	25.7	0.08	25	2	94.1306	0.0367085	0.189783
1	8.93	150	5.9	3.8	30.3	0.718	23	2	84.6868	0.847119	1.83825
2	8.93	150	5.9	3.8	30.3	0.718	23	2	84.6868	0.847119	1.76201
3	8.93	150	5.9	3.8	30.3	0.718	23	2	84.6868	0.847119	1.36386
1	8.93	150	3.6	0.7	28.3	0.278	23	2	84.6868	0.0604198	0.131111
2	8.93	150	3.6	0.7	28.3	0.278	23	2	84.6868	0.0604198	0.125673
3	8.93	150	3.6	0.7	28.3	0.278	23	2	84.6868	0.0604198	0.0972758
1	9.12	150	6	0.4	25.4	0.062	25	2	84.5957	0.00720009	0.0522007
2	9.12	150	6	0.4	25.4	0.062	25	2	84.5957	0.00720009	0.0562327
3	9.12	150	6	0.4	25.4	0.062	25	2	84.5957	0.00720009	0.0673209
4	9.12	150	6	0.4	25.4	0.062	25	2	84.5957	0.00720009	0.0657368
5	9.12	150	6	0.4	25.4	0.062	25	2	84.5957	0.00720009	0.0594008
6	9.12	150	6	0.4	25.4	0.062	25	2	84.5957	0.00720009	0.0434886
1	9.12	150	3.4	1	27	0.182	25	2	84.5957	0.0528394	0.383086
2	9.12	150	3.4	1	27	0.182	25	2	84.5957	0.0528394	0.412676
3	9.12	150	3.4	1	27	0.182	25	2	84.5957	0.0528394	0.494048
4	9.12	150	3.4	1	27	0.182	25	2	84.5957	0.0528394	0.482424
5	9.12	150	3.4	1	27	0.182	25	2	84.5957	0.0528394	0.435925
6	9.12	150	3.4	1	27	0.182	25	2	84.5957	0.0528394	0.31915
1	9.02	150	4.1	1.6	27.5	0.429	25	2	67.384	0.160501	2.38023
2	9.02	150	4.1	1.6	27.5	0.429	25	2	67.384	0.160501	3.25336
3	9.02	150	4.1	1.6	27.5	0.429	25	2	67.384	0.160501	3.18756
4	9.02	150	4.1	1.6	27.5	0.429	25	2	67.384	0.160501	3.01261
5	9.02	150	4.1	1.6	27.5	0.429	25	2	67.384	0.160501	2.64988
6	9.02	150	4.1	1.6	27.5	0.429	25	2	67.384	0.160501	2.02071
1	9.02	150	4.6	2.3	27.6	0.303	25	2	67.384	0.162957	2.41665
2	9.02	150	4.6	2.3	27.6	0.303	25	2	67.384	0.162957	3.30313
3	9.02	150	4.6	2.3	27.6	0.303	25	2	67.384	0.162957	3.23632
4	9.02	150	4.6	2.3	27.6	0.303	25	2	67.384	0.162957	3.05869
5	9.02	150	4.6	2.3	27.6	0.303	25	2	67.384	0.162957	2.69041
6	9.02	150	4.6	2.3	27.6	0.303	25	2	67.384	0.162957	2.05162
1	9.02	150	4.3	0.7	27.2	0.113	14	1	67.384	0.018496	0.274296
2	9.02	150	4.3	0.7	27.2	0.113	14	1	67.384	0.018496	0.374914
3	9.02	150	4.3	0.7	27.2	0.113	14	1	67.384	0.018496	0.367331
4	9.02	150	4.3	0.7	27.2	0.113	14	1	67.384	0.018496	0.34717
5	9.02	150	4.3	0.7	27.2	0.113	14	1	67.384	0.018496	0.305369
6	9.02	150	4.3	0.7	27.2	0.113	14	1	67.384	0.018496	0.232865
1	9.02	150	3.1	0.7	26.4	0.184	14	1	67.384	0.0301174	0.446641
2	9.02	150	3.1	0.7	26.4	0.184	14	1	67.384	0.0301174	0.610479
3	9.02	150	3.1	0.7	26.4	0.184	14	1	67.384	0.0301174	0.598131
4	9.02	150	3.1	0.7	26.4	0.184	14	1	67.384	0.0301174	0.565303
5	9.02	150	3.1	0.7	26.4	0.184	14	1	67.384	0.0301174	0.497238
6	9.02	150	3.1	0.7	26.4	0.184	14	1	67.384	0.0301174	0.379178
1	9.02	150	7.4	5.8	29.8	0.463	13	1	67.384	0.627929	9.31218
2	9.02	150	7.4	5.8	29.8	0.463	13	1	67.384	0.627929	12.7281
3	9.02	150	7.4	5.8	29.8	0.463	13	1	67.384	0.627929	12.4707
4	9.02	150	7.4	5.8	29.8	0.463	13	1	67.384	0.627929	11.7862
5	9.02	150	7.4	5.8	29.8	0.463	13	1	67.384	0.627929	10.3671
6	9.02	150	7.4	5.8	29.8	0.463	13	1	67.384	0.627929	7.90562
1	11.24	150	2.8	1.9	24	0.15	14.7	1	81.5603	0.13872	0.814286
2	11.24	150	2.8	1.9	24	0.15	14.7	1	81.5603	0.13872	1.0723
3	11.24	150	2.8	1.9	24	0.15	14.7	1	81.5603	0.13872	0.987686
4	11.24	150	2.8	1.9	24	0.15	14.7	1	81.5603	0.13872	0.751862
5	11.24	150	2.8	1.9	24	0.15	14.7	1	81.5603	0.13872	0.692212
6	11.24	150	2.8	1.9	24	0.15	14.7	1	81.5603	0.13872	0.898905
1	11.24	150	3.47	1.7	26	0.14	14	1	81.5603	0.115843	0.68
2	11.24	150	3.47	1.7	26	0.14	14	1	81.5603	0.115843	0.895468
3	11.24	150	3.47	1.7	26	0.14	14	1	81.5603	0.115843	0.824804
4	11.24	150	3.47	1.7	26	0.14	14	1	81.5603	0.115843	0.627871
5	11.24	150	3.47	1.7	26	0.14	14	1	81.5603	0.115843	0.578058
6	11.24	150	3.47	1.7	26	0.14	14	1	81.5603	0.115843	0.750664
1	9.73	212	1.7	1	27.7	0.438	25	2	97.7983	0.41774	0.296595
2	9.73	212	1.7	1	27.7	0.438	25	2	97.7983	0.41774	0.413562
3	9.73	212	1.7	1	27.7	0.438	25	2	97.7983	0.41774	0.51382
4	9.73	212	1.7	1	27.7	0.438	25	2	97.7983	0.41774	0.710157
5	9.73	212	1.7	1	27.7	0.438	25	2	97.7983	0.41774	0.555594
6	9.73	212	1.7	1	27.7	0.438	25	2	97.7983	0.41774	0.40103
2	9.1	212	2.5	1.6	29.3	0.484	25	2	95.9722	0.33266	0.19627
3	9.1	212	2.5	1.6	29.3	0.484	25	2	95.9722	0.33266	2.03255
4	9.1	212	2.5	1.6	29.3	0.484	25	2	95.9722	0.33266	1.99929
5	9.1	212	2.5	1.6	29.3	0.484	25	2	95.9722	0.33266	2.14566
6	9.1	212	2.5	1.6	29.3	0.484	25	2	95.9722	0.33266	2.40181
1	9.1	212	3.9	2.1	30.4	0.511	25	2	95.9722	0.460973	0.0783655
2	9.1	212	3.9	2.1	30.4	0.511	25	2	95.9722	0.460973	0.271974
3	9.1	212	3.9	2.1	30.4	0.511	25	2	95.9722	0.460973	2.81655
4	9.1	212	3.9	2.1	30.4	0.511	25	2	95.9722	0.460973	2.77045
5	9.1	212	3.9	2.1	30.4	0.511	25	2	95.9722	0.460973	2.97328
6	9.1	212	3.9	2.1	30.4	0.511	25	2	95.9722	0.460973	3.32823
1	9.03	300	4.9	1.5	27.7	0.317	25	2	91.3174	0.26042	1.77346
2	9.03	300	4.9	1.5	27.7	0.317	25	2	91.3174	0.26042	2.27867
3	9.03	300	4.9	1.5	27.7	0.317	25	2	91.3174	0.26042	2.41148
4	9.03	300	4.9	1.5	27.7	0.317	25	2	91.3174	0.26042	2.20575
5	9.03	300	4.9	1.5	27.7	0.317	25	2	91.3174	0.26042	1.90888
6	9.03	300	4.9	1.5	27.7	0.317	25	2	91.3174	0.26042	2.18232
1	9.03	300	5.1	0.6	26.9	0.123	13	1	91.3174	0.0404184	0.275249
2	9.03	300	5.1	0.6	26.9	0.123	13	1	91.3174	0.0404184	0.353661
3	9.03	300	5.1	0.6	26.9	0.123	13	1	91.3174	0.0404184	0.374275
4	9.03	300	5.1	0.6	26.9	0.123	13	1	91.3174	0.0404184	0.342344
5	9.03	300	5.1	0.6	26.9	0.123	13	1	91.3174	0.0404184	0.296267
6	9.03	300	5.1	0.6	26.9	0.123	13	1	91.3174	0.0404184	0.338706
1	8.04	150	4.1	1.3	27.8	0.335	23	2	95.0023	0.458518	1.01332
2	8.04	150	4.1	1.3	27.8	0.335	23	2	95.0023	0.458518	0.907865
3	8.04	150	4.1	1.3	27.8	0.335	23	2	95.0023	0.458518	0.990398
4	8.04	150	4.1	1.3	27.8	0.335	23	2	95.0023	0.458518	1.2976
5	8.04	150	4.1	1.3	27.8	0.335	23	2	95.0023	0.458518	1.07752
6	8.04	150	4.1	1.3	27.8	0.335	23	2	95.0023	0.458518	1.21049
1	8.68	150	4.8	1.8	27.5	0.305	23	2	94.4039	0.395704	0.830979
2	8.68	150	4.8	1.8	27.5	0.305	23	2	94.4039	0.395704	1.21877
3	8.68	150	4.8	1.8	27.5	0.305	23	2	94.4039	0.395704	1.36122
4	8.68	150	4.8	1.8	27.5	0.305	23	2	94.4039	0.395704	1.25043
5	8.68	150	4.8	1.8	27.5	0.305	23	2	94.4039	0.395704	1.23855
6	8.68	150	4.8	1.8	27.5	0.305	23	2	94.4039	0.395704	1.66987
1	8.68	150	4.3	0.5	26.4	0.103	25	2	94.4039	0.0371198	0.0779516
2	8.68	150	4.3	0.5	26.4	0.103	25	2	94.4039	0.0371198	0.114329
3	8.68	150	4.3	0.5	26.4	0.103	25	2	94.4039	0.0371198	0.127692
4	8.68	150	4.3	0.5	26.4	0.103	25	2	94.4039	0.0371198	0.117299
5	8.68	150	4.3	0.5	26.4	0.103	25	2	94.4039	0.0371198	0.116185
6	8.68	150	4.3	0.5	26.4	0.103	25	2	94.4039	0.0371198	0.156646
1	12.2	150	3.4	1.1	34	0.102	29	2	95.9702	0.173846	0.625844
2	12.2	150	3.4	1.1	34	0.102	29	2	95.9702	0.173846	0.839675
3	12.2	150	3.4	1.1	34	0.102	29	2	95.9702	0.173846	0.886613
4	12.2	150	3.4	1.1	34	0.102	29	2	95.9702	0.173846	0.700598
5	12.2	150	3.4	1.1	34	0.102	29	2	95.9702	0.173846	0.707552
6	12.2	150	3.4	1.1	34	0.102	29	2	95.9702	0.173846	0.787521
1	9.57	150	5.1	3	27.2	0.227	17	2	76.6958	0.589406	2.51676
2	9.57	150	5.1	3	27.2	0.227	17	2	76.6958	0.589406	1.60908
3	9.57	150	5.1	3	27.2	0.227	17	2	76.6958	0.589406	1.71517
4	9.57	150	5.1	3	27.2	0.227	17	2	76.6958	0.589406	1.67391
5	9.57	150	5.1	3	27.2	0.227	17	2	76.6958	0.589406	1.85663
6	9.57	150	5.1	3	27.2	0.227	17	2	76.6958	0.589406	1.23775
1	9.03	212	3.3	2.1	27.2	0.317	25	2	94.7608	0.322108	1.08228
2	9.03	212	3.3	2.1	27.2	0.317	25	2	94.7608	0.322108	1.32064
3	9.03	212	3.3	2.1	27.2	0.317	25	2	94.7608	0.322108	0.711858
4	9.03	212	3.3	2.1	27.2	0.317	25	2	94.7608	0.322108	0.692532
5	9.03	212	3.3	2.1	27.2	0.317	25	2	94.7608	0.322108	0.6571
6	9.03	212	3.3	2.1	27.2	0.317	25	2	94.7608	0.322108	0.6571
1	9.03	212	3.7	1	26.9	0.107	27	2	94.7608	0.0517734	0.173958
2	9.03	212	3.7	1	26.9	0.107	27	2	94.7608	0.0517734	0.212271
3	9.03	212	3.7	1	26.9	0.107	27	2	94.7608	0.0517734	0.114419
4	9.03	212	3.7	1	26.9	0.107	27	2	94.7608	0.0517734	0.111313
5	9.03	212	3.7	1	26.9	0.107	27	2	94.7608	0.0517734	0.105618
6	9.03	212	3.7	1	26.9	0.107	27	2	94.7608	0.0517734	0.105618
1	9.37	212	4.4	0.8	33	0.123	21	2	95.3594	0.0650063	0.0585056
2	9.37	212	4.4	0.8	33	0.123	21	2	95.3594	0.0650063	0.131963
3	9.37	212	4.4	0.8	33	0.123	21	2	95.3594	0.0650063	0.167066
4	9.37	212	4.4	0.8	33	0.123	21	2	95.3594	0.0650063	0.164466
5	9.37	212	4.4	0.8	33	0.123	21	2	95.3594	0.0650063	0.193069
6	9.37	212	4.4	0.8	33	0.123	21	2	95.3594	0.0650063	0.236623
1	9.98	212	6.1	4.2	27.7	0.43	25	2	95.4088	0.726527	3.25484
2	9.98	212	6.1	4.2	27.7	0.43	25	2	95.4088	0.726527	4.67157
3	9.98	212	6.1	4.2	27.7	0.43	25	2	95.4088	0.726527	5.10748
4	9.98	212	6.1	4.2	27.7	0.43	25	2	95.4088	0.726527	7.73024
5	9.98	212	6.1	4.2	27.7	0.43	25	2	95.4088	0.726527	7.58494
6	9.98	212	6.1	4.2	27.7	0.43	25	2	95.4088	0.726527	6.69131
1	9.98	212	3.4	2.4	26.7	0.221	25	2	95.4088	0.213372	0.955906
2	9.98	212	3.4	2.4	26.7	0.221	25	2	95.4088	0.213372	1.37198
3	9.98	212	3.4	2.4	26.7	0.221	25	2	95.4088	0.213372	1.5
4	9.98	212	3.4	2.4	26.7	0.221	25	2	95.4088	0.213372	2.27028
5	9.98	212	3.4	2.4	26.7	0.221	25	2	95.4088	0.213372	2.2276
6	9.98	212	3.4	2.4	26.7	0.221	25	2	95.4088	0.213372	1.96516
1	9.1	300	2.7	1.6	28	0.145	25	2	97.2343	0.620487	0.95555
2	9.1	300	2.7	1.6	28	0.145	25	2	97.2343	0.620487	1.272
3	9.1	300	2.7	1.6	28	0.145	25	2	97.2343	0.620487	1.18513
4	9.1	300	2.7	1.6	28	0.145	25	2	97.2343	0.620487	1.35887
5	9.1	300	2.7	1.6	28	0.145	25	2	97.2343	0.620487	1.55742
6	9.1	300	2.7	1.6	28	0.145	25	2	97.2343	0.620487	1.09206
1	9.1	300	0.7	0.7	37	0.158	27	2	97.2343	0.295801	0.455534
2	9.1	300	0.7	0.7	37	0.158	27	2	97.2343	0.295801	0.606392
3	9.1	300	0.7	0.7	37	0.158	27	2	97.2343	0.295801	0.56498
4	9.1	300	0.7	0.7	37	0.158	27	2	97.2343	0.295801	0.647804
5	9.1	300	0.7	0.7	37	0.158	27	2	97.2343	0.295801	0.742461
6	9.1	300	0.7	0.7	37	0.158	27	2	97.2343	0.295801	0.52061
1	9.87	212	4	3.2	27.7	0.214	28	2	94.3847	0.326874	1.6932
2	9.87	212	4	3.2	27.7	0.214	28	2	94.3847	0.326874	1.70955
3	9.87	212	4	3.2	27.7	0.214	28	2	94.3847	0.326874	1.15713
4	9.87	212	4	3.2	27.7	0.214	28	2	94.3847	0.326874	1.04273
5	9.87	212	4	3.2	27.7	0.214	28	2	94.3847	0.326874	0.902171
6	9.87	212	4	3.2	27.7	0.214	28	2	94.3847	0.326874	1.02638
1	9.87	212	4.3	2.5	27.7	0.338	28	2	94.3847	0.403341	2.08931
2	9.87	212	4.3	2.5	27.7	0.338	28	2	94.3847	0.403341	2.10947
3	9.87	212	4.3	2.5	27.7	0.338	28	2	94.3847	0.403341	1.42783
4	9.87	212	4.3	2.5	27.7	0.338	28	2	94.3847	0.403341	1.28666
5	9.87	212	4.3	2.5	27.7	0.338	28	2	94.3847	0.403341	1.11322
6	9.87	212	4.3	2.5	27.7	0.338	28	2	94.3847	0.403341	1.26649
1	9.78	212	5.6	3.1	28.2	0.301	50	1	75.687	0.24123	2.18554
2	9.78	212	5.6	3.1	28.2	0.301	50	1	75.687	0.24123	1.55593
3	9.78	212	5.6	3.1	28.2	0.301	50	1	75.687	0.24123	1.79234
4	9.78	212	5.6	3.1	28.2	0.301	50	1	75.687	0.24123	2.68247
5	9.78	212	5.6	3.1	28.2	0.301	50	1	75.687	0.24123	2.40506
6	9.78	212	5.6	3.1	28.2	0.301	50	1	75.687	0.24123	2.8441
1	9.02	150	4.3	0.3	25.6	0.063	27	2	90.004	0.00487528	0.0347608
2	9.02	150	4.3	0.3	25.6	0.063	27	2	90.004	0.00487528	0.0348095
3	9.02	150	4.3	0.3	25.6	0.063	27	2	90.004	0.00487528	0.039636
4	9.02	150	4.3	0.3	25.6	0.063	27	2	90.004	0.00487528	0.0251077
5	9.02	150	4.3	0.3	25.6	0.063	27	2	90.004	0.00487528	0.0152109
6	9.02	150	4.3	0.3	25.6	0.063	27	2	90.004	0.00487528	0.0116032
1	9.02	150	5.6	2	29.9	0.611	25	2	90.004	0.315217	2.24749
2	9.02	150	5.6	2	29.9	0.611	25	2	90.004	0.315217	2.25065
3	9.02	150	5.6	2	29.9	0.611	25	2	90.004	0.315217	2.56271
4	9.02	150	5.6	2	29.9	0.611	25	2	90.004	0.315217	1.62337
5	9.02	150	5.6	2	29.9	0.611	25	2	90.004	0.315217	0.983476
6	9.02	150	5.6	2	29.9	0.611	25	2	90.004	0.315217	0.750215
1	8.9	150	0.7	0.2	25.7	0.03	23	2	0	0.00304599	0.0181237
2	8.9	150	0.7	0.2	25.7	0.03	23	2	0	0.00304599	0.0178191
3	8.9	150	0.7	0.2	25.7	0.03	23	2	0	0.00304599	0.0157478
4	8.9	150	0.7	0.2	25.7	0.03	23	2	0	0.00304599	0.0188242
5	8.9	150	0.7	0.2	25.7	0.03	23	2	0	0.00304599	0.0187938
6	8.9	150	0.7	0.2	25.7	0.03	23	2	0	0.00304599	0.019007
1	8.9	150	1.1	0.7	29.3	0.074	23	2	0	0.0262971	0.156468
2	8.9	150	1.1	0.7	29.3	0.074	23	2	0	0.0262971	0.153838
3	8.9	150	1.1	0.7	29.3	0.074	23	2	0	0.0262971	0.135956
4	8.9	150	1.1	0.7	29.3	0.074	23	2	0	0.0262971	0.162516
5	8.9	150	1.1	0.7	29.3	0.074	23	2	0	0.0262971	0.162253
6	8.9	150	1.1	0.7	29.3	0.074	23	2	0	0.0262971	0.164094
1	6	150	2.4	0.7	29	0.008	37	2	91.8178	0.00348107	0.00706658
2	6	150	2.4	0.7	29	0.008	37	2	91.8178	0.00348107	0.00856344
3	6	150	2.4	0.7	29	0.008	37	2	91.8178	0.00348107	0.00250637
4	6	150	2.4	0.7	29	0.008	37	2	91.8178	0.00348107	0.0051868
5	6	150	2.4	0.7	29	0.008	37	2	91.8178	0.00348107	0.00184497
6	6	150	2.4	0.7	29	0.008	37	2	91.8178	0.00348107	0.00100951
1	10.86	300	3.9	2.7	27	0.03	49	2	97.1901	0.595588	2.54316
1	9.88	212	4.8	4.2	27.7	0.22	25	2	84.9928	0.343916	2.41085
2	9.88	212	4.8	4.2	27.7	0.22	25	2	84.9928	0.343916	2.54154
3	9.88	212	4.8	4.2	27.7	0.22	25	2	84.9928	0.343916	2.04286
4	9.88	212	4.8	4.2	27.7	0.22	25	2	84.9928	0.343916	1.13148
5	9.88	212	4.8	4.2	27.7	0.22	25	2	84.9928	0.343916	0.918257
6	9.88	212	4.8	4.2	27.7	0.22	25	2	84.9928	0.343916	0.588097
1	9.88	212	4.2	3.6	27.3	0.244	25	2	84.9928	0.326944	2.29188
2	9.88	212	4.2	3.6	27.3	0.244	25	2	84.9928	0.326944	2.41611
3	9.88	212	4.2	3.6	27.3	0.244	25	2	84.9928	0.326944	1.94205
4	9.88	212	4.2	3.6	27.3	0.244	25	2	84.9928	0.326944	1.07565
5	9.88	212	4.2	3.6	27.3	0.244	25	2	84.9928	0.326944	0.87294
6	9.88	212	4.2	3.6	27.3	0.244	25	2	84.9928	0.326944	0.559074
1	10.58	212	3.8	1.7	28.8	0.207	13	1	96.5169	0.454827	2.25594
2	10.58	212	3.8	1.7	28.8	0.207	13	1	96.5169	0.454827	2.60161
3	10.58	212	3.8	1.7	28.8	0.207	13	1	96.5169	0.454827	1.80112
4	10.58	212	3.8	1.7	28.8	0.207	13	1	96.5169	0.454827	1.5737
5	10.58	212	3.8	1.7	28.8	0.207	13	1	96.5169	0.454827	1.64193
6	10.58	212	3.8	1.7	28.8	0.207	13	1	96.5169	0.454827	1.57825
1	9.29	212	4.1	1.1	28	0.152	25	2	99.6499	0.192096	0.153676
2	9.29	212	4.1	1.1	28	0.152	25	2	99.6499	0.192096	0.188254
3	9.29	212	4.1	1.1	28	0.152	25	2	99.6499	0.192096	0.157518
4	9.29	212	4.1	1.1	28	0.152	25	2	99.6499	0.192096	0.155597
5	9.29	212	4.1	1.1	28	0.152	25	2	99.6499	0.192096	0.107574
6	9.29	212	4.1	1.1	28	0.152	25	2	99.6499	0.192096	0.0557077
1	12.53	150	4.3	1.6	28.5	0.201	23	2	93.4896	0.129861	0.535026
2	12.53	150	4.3	1.6	28.5	0.201	23	2	93.4896	0.129861	0.570088
3	12.53	150	4.3	1.6	28.5	0.201	23	2	93.4896	0.129861	0.636317
4	12.53	150	4.3	1.6	28.5	0.201	23	2	93.4896	0.129861	0.605151
5	12.53	150	4.3	1.6	28.5	0.201	23	2	93.4896	0.129861	0.501262
6	12.53	150	4.3	1.6	28.5	0.201	23	2	93.4896	0.129861	0.402568
1	12.53	150	4.9	0.7	26.4	0.12	25	2	93.4896	0.0339188	0.139746
2	12.53	150	4.9	0.7	26.4	0.12	25	2	93.4896	0.0339188	0.148904
3	12.53	150	4.9	0.7	26.4	0.12	25	2	93.4896	0.0339188	0.166202
4	12.53	150	4.9	0.7	26.4	0.12	25	2	93.4896	0.0339188	0.158062
5	12.53	150	4.9	0.7	26.4	0.12	25	2	93.4896	0.0339188	0.130927
6	12.53	150	4.9	0.7	26.4	0.12	25	2	93.4896	0.0339188	0.105148
1	9.57	150	3.6	2.4	27.4	0.199	23	2	78.0142	0.312014	0.255852
2	9.57	150	3.6	2.4	27.4	0.199	23	2	78.0142	0.312014	0.177848
3	9.57	150	3.6	2.4	27.4	0.199	23	2	78.0142	0.312014	0.405618
4	9.57	150	3.6	2.4	27.4	0.199	23	2	78.0142	0.312014	0.564746
5	9.57	150	3.6	2.4	27.4	0.199	23	2	78.0142	0.312014	0.156007
6	9.57	150	3.6	2.4	27.4	0.199	23	2	78.0142	0.312014	0.296413
1	9.79	150	2.5	0.3	25.8	0.092	25	2	92.0696	0.0139662	0.0121506
2	9.79	150	2.5	0.3	25.8	0.092	25	2	92.0696	0.0139662	0.0156421
3	9.79	150	2.5	0.3	25.8	0.092	25	2	92.0696	0.0139662	0.0209493
4	9.79	150	2.5	0.3	25.8	0.092	25	2	92.0696	0.0139662	0.0216476
5	9.79	150	2.5	0.3	25.8	0.092	25	2	92.0696	0.0139662	0.0118713
6	9.79	150	2.5	0.3	25.8	0.092	25	2	92.0696	0.0139662	0.0256978
1	10.65	150	2.1	1.2	29	0.35	23	2	97.6	0.177688	0.206118
2	10.65	150	2.1	1.2	29	0.35	23	2	97.6	0.177688	0.158142
3	10.65	150	2.1	1.2	29	0.35	23	2	97.6	0.177688	0.0533063
4	10.65	150	2.1	1.2	29	0.35	23	2	97.6	0.177688	0.103059
5	10.65	150	2.1	1.2	29	0.35	23	2	97.6	0.177688	0.111943
1	10.65	150	2.2	0.9	30	0.173	25	2	97.5504	0.0658713	0.080363
2	10.65	150	2.2	0.9	30	0.173	25	2	97.5504	0.0658713	0.0731171
3	10.65	150	2.2	0.9	30	0.173	25	2	97.5504	0.0658713	0.0553319
4	10.65	150	2.2	0.9	30	0.173	25	2	97.5504	0.0658713	0.0164678
1	9.65	212	4	2.2	28	0.359	25	2	94.363	0.325503	0.504529
2	9.65	212	4	2.2	28	0.359	25	2	94.363	0.325503	1.21738
3	9.65	212	4	2.2	28	0.359	25	2	94.363	0.325503	2.45429
4	9.65	212	4	2.2	28	0.359	25	2	94.363	0.325503	1.83584
5	9.65	212	4	2.2	28	0.359	25	2	94.363	0.325503	1.54939
6	9.65	212	4	2.2	28	0.359	25	2	94.363	0.325503	1.136
1	9.65	212	2.6	1.3	29	0.469	25	2	94.363	0.251278	0.38948
2	9.65	212	2.6	1.3	29	0.469	25	2	94.363	0.251278	0.939778
3	9.65	212	2.6	1.3	29	0.469	25	2	94.363	0.251278	1.89463
4	9.65	212	2.6	1.3	29	0.469	25	2	94.363	0.251278	1.41721
5	9.65	212	2.6	1.3	29	0.469	25	2	94.363	0.251278	1.19608
6	9.65	212	2.6	1.3	29	0.469	25	2	94.363	0.251278	0.876959
1	9.65	212	3.8	1.6	27.7	0.294	25	2	94.363	0.193867	0.300495
2	9.65	212	3.8	1.6	27.7	0.294	25	2	94.363	0.193867	0.725064
3	9.65	212	3.8	1.6	27.7	0.294	25	2	94.363	0.193867	1.46176
4	9.65	212	3.8	1.6	27.7	0.294	25	2	94.363	0.193867	1.09341
5	9.65	212	3.8	1.6	27.7	0.294	25	2	94.363	0.193867	0.922809
6	9.65	212	3.8	1.6	27.7	0.294	25	2	94.363	0.193867	0.676597
1	9.65	212	3.3	1.5	28.1	0.371	25	2	94.363	0.229352	0.355496
2	9.65	212	3.3	1.5	28.1	0.371	25	2	94.363	0.229352	0.857777
3	9.65	212	3.3	1.5	28.1	0.371	25	2	94.363	0.229352	1.72932
4	9.65	212	3.3	1.5	28.1	0.371	25	2	94.363	0.229352	1.29355
5	9.65	212	3.3	1.5	28.1	0.371	25	2	94.363	0.229352	1.09172
6	9.65	212	3.3	1.5	28.1	0.371	25	2	94.363	0.229352	0.800439
1	9.1	212	3.5	1.1	27.4	0.146	25	2	96.0831	0.213309	0.209042
2	9.1	212	3.5	1.1	27.4	0.146	25	2	96.0831	0.213309	0.561001
3	9.1	212	3.5	1.1	27.4	0.146	25	2	96.0831	0.213309	0.985485
4	9.1	212	3.5	1.1	27.4	0.146	25	2	96.0831	0.213309	1.09854
5	9.1	212	3.5	1.1	27.4	0.146	25	2	96.0831	0.213309	1.08574
6	9.1	212	3.5	1.1	27.4	0.146	25	2	96.0831	0.213309	0.8639
1	9.1	212	3.6	1.3	27.2	0.168	25	2	96.0831	0.290078	0.284277
2	9.1	212	3.6	1.3	27.2	0.168	25	2	96.0831	0.290078	0.762906
3	9.1	212	3.6	1.3	27.2	0.168	25	2	96.0831	0.290078	1.34016
4	9.1	212	3.6	1.3	27.2	0.168	25	2	96.0831	0.290078	1.4939
5	9.1	212	3.6	1.3	27.2	0.168	25	2	96.0831	0.290078	1.4765
6	9.1	212	3.6	1.3	27.2	0.168	25	2	96.0831	0.290078	1.17482
1	10.69	150	2.3	1.5	36	0.035	25	2	74	0.225806	0.900968
2	10.69	150	2.3	1.5	36	0.035	25	2	74	0.225806	0.862581
3	10.69	150	2.3	1.5	36	0.035	25	2	74	0.225806	0.75871
4	10.69	150	2.3	1.5	36	0.035	25	2	74	0.225806	0.871613
5	10.69	150	2.3	1.5	36	0.035	25	2	74	0.225806	0.869355
6	10.69	150	2.3	1.5	36	0.035	25	2	74	0.225806	0.564516
1	8.04	150	6.4	3.7	27.9	0.249	23	2	96.5721	0.531898	0.994649
2	8.04	150	6.4	3.7	27.9	0.249	23	2	96.5721	0.531898	0.537217
3	8.04	150	6.4	3.7	27.9	0.249	23	2	96.5721	0.531898	0.792528
4	8.04	150	6.4	3.7	27.9	0.249	23	2	96.5721	0.531898	1.82973
5	8.04	150	6.4	3.7	27.9	0.249	23	2	96.5721	0.531898	1.27124
6	8.04	150	6.4	3.7	27.9	0.249	23	2	96.5721	0.531898	0.856355
1	9.34	212	3.1	1.7	27.4	0.243	25	2	98.656	0.400213	0.328175
2	9.34	212	3.1	1.7	27.4	0.243	25	2	98.656	0.400213	0.584311
3	9.34	212	3.1	1.7	27.4	0.243	25	2	98.656	0.400213	0.680362
4	9.34	212	3.1	1.7	27.4	0.243	25	2	98.656	0.400213	0.700373
5	9.34	212	3.1	1.7	27.4	0.243	25	2	98.656	0.400213	1.26467
6	9.34	212	3.1	1.7	27.4	0.243	25	2	98.656	0.400213	1.36473
1	9.87	212	4.6	3	27	0.221	25	2	98.2955	0.610666	1.19691
2	9.87	212	4.6	3	27	0.221	25	2	98.2955	0.610666	1.34957
3	9.87	212	4.6	3	27	0.221	25	2	98.2955	0.610666	1.32515
4	9.87	212	4.6	3	27	0.221	25	2	98.2955	0.610666	1.11141
5	9.87	212	4.6	3	27	0.221	25	2	98.2955	0.610666	1.31293
6	9.87	212	4.6	3	27	0.221	25	2	98.2955	0.610666	1.28851
1	9.87	212	3.3	1.8	27.5	0.216	25	2	98.2955	0.35811	0.701896
2	9.87	212	3.3	1.8	27.5	0.216	25	2	98.2955	0.35811	0.791423
3	9.87	212	3.3	1.8	27.5	0.216	25	2	98.2955	0.35811	0.777099
4	9.87	212	3.3	1.8	27.5	0.216	25	2	98.2955	0.35811	0.65176
5	9.87	212	3.3	1.8	27.5	0.216	25	2	98.2955	0.35811	0.769936
6	9.87	212	3.3	1.8	27.5	0.216	25	2	98.2955	0.35811	0.755612
1	10.47	212	4.7	2	28.1	0.27	27	2	92.2123	0.323198	1.61276
2	10.47	212	4.7	2	28.1	0.27	27	2	92.2123	0.323198	1.26371
3	10.47	212	4.7	2	28.1	0.27	27	2	92.2123	0.323198	1.4447
4	10.47	212	4.7	2	28.1	0.27	27	2	92.2123	0.323198	1.3639
5	10.47	212	4.7	2	28.1	0.27	27	2	92.2123	0.323198	1.50934
1	10.47	212	8	2.6	28.5	0.293	38	2	92.2123	0.455949	2.27519
2	10.47	212	8	2.6	28.5	0.293	38	2	92.2123	0.455949	1.78276
3	10.47	212	8	2.6	28.5	0.293	38	2	92.2123	0.455949	2.03809
4	10.47	212	8	2.6	28.5	0.293	38	2	92.2123	0.455949	1.92411
5	10.47	212	8	2.6	28.5	0.293	38	2	92.2123	0.455949	2.12928
1	11.11	212	3.7	1.6	26.2	0.156	25	2	97.2399	0.24109	0.67264
2	11.11	212	3.7	1.6	26.2	0.156	25	2	97.2399	0.24109	0.489412
3	11.11	212	3.7	1.6	26.2	0.156	25	2	97.2399	0.24109	0.361634
4	11.11	212	3.7	1.6	26.2	0.156	25	2	97.2399	0.24109	0.477357
5	11.11	212	3.7	1.6	26.2	0.156	25	2	97.2399	0.24109	0.301362
6	11.11	212	3.7	1.6	26.2	0.156	25	2	97.2399	0.24109	0.212159
1	11.7	150	4.9	3.2	30.5	0.503	25	2	83.36	0.346926	3.09111
2	11.7	150	4.9	3.2	30.5	0.503	25	2	83.36	0.346926	2.88296
3	11.7	150	4.9	3.2	30.5	0.503	25	2	83.36	0.346926	2.87602
4	11.7	150	4.9	3.2	30.5	0.503	25	2	83.36	0.346926	2.45277
5	11.7	150	4.9	3.2	30.5	0.503	25	2	83.36	0.346926	2.0087
6	11.7	150	4.9	3.2	30.5	0.503	25	2	83.36	0.346926	2.01564
1	9.16	150	6	2.8	28	0.301	25	2	96.5956	0.653232	1.76373
2	9.16	150	6	2.8	28	0.301	25	2	96.5956	0.653232	0.960251
3	9.16	150	6	2.8	28	0.301	25	2	96.5956	0.653232	0.823072
4	9.16	150	6	2.8	28	0.301	25	2	96.5956	0.653232	0.56178
5	9.16	150	6	2.8	28	0.301	25	2	96.5956	0.653232	0.45073
6	9.16	150	6	2.8	28	0.301	25	2	96.5956	0.653232	0.0653232
1	12.53	150	5.7	1.3	26.6	0.115	27	2	0	0.0705755	0.285831
2	12.53	150	5.7	1.3	26.6	0.115	27	2	0	0.0705755	0.226547
3	12.53	150	5.7	1.3	26.6	0.115	27	2	0	0.0705755	0.278067
4	12.53	150	5.7	1.3	26.6	0.115	27	2	0	0.0705755	0.33241
5	12.53	150	5.7	1.3	26.6	0.115	27	2	0	0.0705755	0.275244
6	12.53	150	5.7	1.3	26.6	0.115	27	2	0	0.0705755	0.33241
1	12.53	150	3.4	1.2	30.6	0.562	25	2	0	0.318369	1.28939
2	12.53	150	3.4	1.2	30.6	0.562	25	2	0	0.318369	1.02196
3	12.53	150	3.4	1.2	30.6	0.562	25	2	0	0.318369	1.25437
4	12.53	150	3.4	1.2	30.6	0.562	25	2	0	0.318369	1.49952
5	12.53	150	3.4	1.2	30.6	0.562	25	2	0	0.318369	1.24164
6	12.53	150	3.4	1.2	30.6	0.562	25	2	0	0.318369	1.49952
1	12.53	150	5.2	2.1	30.2	0.464	13	1	90.2102	0.515446	0.216488
2	12.53	150	5.2	2.1	30.2	0.464	13	1	90.2102	0.515446	0.469056
1	12.53	150	5.7	1.4	26.2	0.163	27	2	90.2102	0.120715	0.0507004
2	12.53	150	5.7	1.4	26.2	0.163	27	2	90.2102	0.120715	0.109851
1	12.53	150	4.1	0.2	25.1	0.062	15	1	90.2102	0.00655946	0.00275497
2	12.53	150	4.1	0.2	25.1	0.062	15	1	90.2102	0.00655946	0.00596911
1	12.53	150	3.2	1.1	28.9	0.308	13	1	90.2102	0.179221	0.075273
2	12.53	150	3.2	1.1	28.9	0.308	13	1	90.2102	0.179221	0.163091
1	12.53	150	5.2	1.1	28.3	0.306	25	2	90.2102	0.178058	0.0747842
2	12.53	150	5.2	1.1	28.3	0.306	25	2	90.2102	0.178058	0.162032
1	10.17	150	5.1	2.1	27.4	0.294	25	2	88.7574	0.166748	0.485236
2	10.17	150	5.1	2.1	27.4	0.294	25	2	88.7574	0.166748	0.631974
3	10.17	150	5.1	2.1	27.4	0.294	25	2	88.7574	0.166748	0.615299
4	10.17	150	5.1	2.1	27.4	0.294	25	2	88.7574	0.166748	0.695338
5	10.17	150	5.1	2.1	27.4	0.294	25	2	88.7574	0.166748	0.618634
6	10.17	150	5.1	2.1	27.4	0.294	25	2	88.7574	0.166748	0.595289
1	10.17	150	6	2.4	27.7	0.306	25	2	88.7574	0.198347	0.57719
2	10.17	150	6	2.4	27.7	0.306	25	2	88.7574	0.198347	0.751736
3	10.17	150	6	2.4	27.7	0.306	25	2	88.7574	0.198347	0.731901
4	10.17	150	6	2.4	27.7	0.306	25	2	88.7574	0.198347	0.827107
5	10.17	150	6	2.4	27.7	0.306	25	2	88.7574	0.198347	0.735868
6	10.17	150	6	2.4	27.7	0.306	25	2	88.7574	0.198347	0.708099
1	9.63	106	5.8	2.9	33	0.155	17	2	0	0.529758	0.572139
2	9.63	106	5.8	2.9	33	0.155	17	2	0	0.529758	0.92178
3	9.63	106	5.8	2.9	33	0.155	17	2	0	0.529758	0.96416
4	9.63	106	5.8	2.9	33	0.155	17	2	0	0.529758	1.20255
5	9.63	106	5.8	2.9	33	0.155	17	2	0	0.529758	1.00654
6	9.63	106	5.8	2.9	33	0.155	17	2	0	0.529758	0.842316
1	9.63	106	2.6	1.4	32	0.095	17	2	0	0.156747	0.169287
2	9.63	106	2.6	1.4	32	0.095	17	2	0	0.156747	0.27274
3	9.63	106	2.6	1.4	32	0.095	17	2	0	0.156747	0.28528
4	9.63	106	2.6	1.4	32	0.095	17	2	0	0.156747	0.355816
5	9.63	106	2.6	1.4	32	0.095	17	2	0	0.156747	0.29782
6	9.63	106	2.6	1.4	32	0.095	17	2	0	0.156747	0.249228
1	9.63	106	1.6	1.4	32	0.19	17	2	0	0.313494	0.338574
2	9.63	106	1.6	1.4	32	0.19	17	2	0	0.313494	0.54548
3	9.63	106	1.6	1.4	32	0.19	17	2	0	0.313494	0.57056
4	9.63	106	1.6	1.4	32	0.19	17	2	0	0.313494	0.711632
5	9.63	106	1.6	1.4	32	0.19	17	2	0	0.313494	0.595639
6	9.63	106	1.6	1.4	32	0.19	17	2	0	0.313494	0.498456
1	10.38	212	3.3	0.7	27.3	0.083	27	2	96.1128	0.0519539	0.0872825
2	10.38	212	3.3	0.7	27.3	0.083	27	2	96.1128	0.0519539	0.0779308
3	10.38	212	3.3	0.7	27.3	0.083	27	2	96.1128	0.0519539	0.0893606
4	10.38	212	3.3	0.7	27.3	0.083	27	2	96.1128	0.0519539	0.0228597
5	10.38	212	3.3	0.7	27.3	0.083	27	2	96.1128	0.0519539	0.0129885
6	10.38	212	3.3	0.7	27.3	0.083	27	2	96.1128	0.0519539	0.0114298
1	10.38	212	6.6	2.4	27.7	0.318	25	2	96.1128	0.682464	1.14654
2	10.38	212	6.6	2.4	27.7	0.318	25	2	96.1128	0.682464	1.0237
3	10.38	212	6.6	2.4	27.7	0.318	25	2	96.1128	0.682464	1.17384
4	10.38	212	6.6	2.4	27.7	0.318	25	2	96.1128	0.682464	0.300284
5	10.38	212	6.6	2.4	27.7	0.318	25	2	96.1128	0.682464	0.170616
6	10.38	212	6.6	2.4	27.7	0.318	25	2	96.1128	0.682464	0.150142
1	12.53	150	4.7	1.1	28.7	0.309	25	2	97.5194	0.150133	0.477421
2	12.53	150	4.7	1.1	28.7	0.309	25	2	97.5194	0.150133	0.361819
3	12.53	150	4.7	1.1	28.7	0.309	25	2	97.5194	0.150133	0.381337
4	12.53	150	4.7	1.1	28.7	0.309	25	2	97.5194	0.150133	0.412864
5	12.53	150	4.7	1.1	28.7	0.309	25	2	97.5194	0.150133	0.626053
6	12.53	150	4.7	1.1	28.7	0.309	25	2	97.5194	0.150133	0.767177
1	12.53	150	5.6	1	26.9	0.125	27	2	97.5194	0.055212	0.175574
2	12.53	150	5.6	1	26.9	0.125	27	2	97.5194	0.055212	0.133061
3	12.53	150	5.6	1	26.9	0.125	27	2	97.5194	0.055212	0.140239
4	12.53	150	5.6	1	26.9	0.125	27	2	97.5194	0.055212	0.151833
5	12.53	150	5.6	1	26.9	0.125	27	2	97.5194	0.055212	0.230234
6	12.53	150	5.6	1	26.9	0.125	27	2	97.5194	0.055212	0.282133
1	11.4	150	7.5	1.8	27.9	0.228	25	2	95.1266	0.314965	0.437802
2	11.4	150	7.5	1.8	27.9	0.228	25	2	95.1266	0.314965	0.472448
3	11.4	150	7.5	1.8	27.9	0.228	25	2	95.1266	0.314965	0.538591
4	11.4	150	7.5	1.8	27.9	0.228	25	2	95.1266	0.314965	0.828359
5	11.4	150	7.5	1.8	27.9	0.228	25	2	95.1266	0.314965	1.05513
6	11.4	150	7.5	1.8	27.9	0.228	25	2	95.1266	0.314965	0.72757
1	11.4	150	3.8	1.8	27.4	0.174	25	2	95.1266	0.240368	0.334112
2	11.4	150	3.8	1.8	27.4	0.174	25	2	95.1266	0.240368	0.360553
3	11.4	150	3.8	1.8	27.4	0.174	25	2	95.1266	0.240368	0.41103
4	11.4	150	3.8	1.8	27.4	0.174	25	2	95.1266	0.240368	0.632169
5	11.4	150	3.8	1.8	27.4	0.174	25	2	95.1266	0.240368	0.805234
6	11.4	150	3.8	1.8	27.4	0.174	25	2	95.1266	0.240368	0.555251
1	12.68	212	3.7	2.7	26.4	0.171	25	2	93.2023	0.750488	8.21784
2	12.68	212	3.7	2.7	26.4	0.171	25	2	93.2023	0.750488	4.33031
3	12.68	212	3.7	2.7	26.4	0.171	25	2	93.2023	0.750488	5.97388
4	12.68	212	3.7	2.7	26.4	0.171	25	2	93.2023	0.750488	4.83314
5	12.68	212	3.7	2.7	26.4	0.171	25	2	93.2023	0.750488	3.52729
6	12.68	212	3.7	2.7	26.4	0.171	25	2	93.2023	0.750488	5.2384
1	9.87	212	3.9	0.8	27.2	0.104	27	2	76.269	0.0796706	1.22374
2	9.87	212	3.9	0.8	27.2	0.104	27	2	76.269	0.0796706	1.24764
3	9.87	212	3.9	0.8	27.2	0.104	27	2	76.269	0.0796706	1.34006
4	9.87	212	3.9	0.8	27.2	0.104	27	2	76.269	0.0796706	1.58544
5	9.87	212	3.9	0.8	27.2	0.104	27	2	76.269	0.0796706	1.44682
6	9.87	212	3.9	0.8	27.2	0.104	27	2	76.269	0.0796706	1.75196
1	8.56	150	5.1	1.2	27.2	0.201	25	2	96.1135	0.466718	0.914768
2	8.56	150	5.1	1.2	27.2	0.201	25	2	96.1135	0.466718	1.65685
3	8.56	150	5.1	1.2	27.2	0.201	25	2	96.1135	0.466718	1.37682
4	8.56	150	5.1	1.2	27.2	0.201	25	2	96.1135	0.466718	0.63007
5	8.56	150	5.1	1.2	27.2	0.201	25	2	96.1135	0.466718	0.326703
6	8.56	150	5.1	1.2	27.2	0.201	25	2	96.1135	0.466718	0.340704
1	9.74	150	3.4	1.1	27.1	0.183	25	2	83.4135	0.135537	1.1087
2	9.74	150	3.4	1.1	27.1	0.183	25	2	83.4135	0.135537	0.879637
3	9.74	150	3.4	1.1	27.1	0.183	25	2	83.4135	0.135537	0.688529
4	9.74	150	3.4	1.1	27.1	0.183	25	2	83.4135	0.135537	0.820001
5	9.74	150	3.4	1.1	27.1	0.183	25	2	83.4135	0.135537	0.967736
6	9.74	150	3.4	1.1	27.1	0.183	25	2	83.4135	0.135537	0.985356
1	9.74	150	4.6	0.6	27.3	0.216	25	2	83.4135	0.087261	0.713795
2	9.74	150	4.6	0.6	27.3	0.216	25	2	83.4135	0.087261	0.566324
3	9.74	150	4.6	0.6	27.3	0.216	25	2	83.4135	0.087261	0.443286
4	9.74	150	4.6	0.6	27.3	0.216	25	2	83.4135	0.087261	0.527929
5	9.74	150	4.6	0.6	27.3	0.216	25	2	83.4135	0.087261	0.623043
6	9.74	150	4.6	0.6	27.3	0.216	25	2	83.4135	0.087261	0.634387
1	8.56	150	4.1	2.2	26.4	0.139	25	2	94.3407	0.418045	3.49904
2	8.56	150	4.1	2.2	26.4	0.139	25	2	94.3407	0.418045	3.98815
3	8.56	150	4.1	2.2	26.4	0.139	25	2	94.3407	0.418045	3.30674
4	8.56	150	4.1	2.2	26.4	0.139	25	2	94.3407	0.418045	3.48232
5	8.56	150	4.1	2.2	26.4	0.139	25	2	94.3407	0.418045	2.0735
6	8.56	150	4.1	2.2	26.4	0.139	25	2	94.3407	0.418045	1.31684
1	9.01	212	3.1	1.5	27.2	0.232	50	1	98.04	0.0775073	0.631684
2	9.01	212	3.1	1.5	27.2	0.232	50	1	98.04	0.0775073	0.449542
3	9.01	212	3.1	1.5	27.2	0.232	50	1	98.04	0.0775073	0.578204
4	9.01	212	3.1	1.5	27.2	0.232	50	1	98.04	0.0775073	0.335607
1	9.01	212	8.5	2.4	27.2	0.227	50	1	98.04	0.121339	0.988913
2	9.01	212	8.5	2.4	27.2	0.227	50	1	98.04	0.121339	0.703766
3	9.01	212	8.5	2.4	27.2	0.227	50	1	98.04	0.121339	0.905189
4	9.01	212	8.5	2.4	27.2	0.227	50	1	98.04	0.121339	0.525398
1	9.01	212	4.2	1.3	28.4	0.34	40	1	98.04	0.0984432	0.802312
2	9.01	212	4.2	1.3	28.4	0.34	40	1	98.04	0.0984432	0.57097
3	9.01	212	4.2	1.3	28.4	0.34	40	1	98.04	0.0984432	0.734386
4	9.01	212	4.2	1.3	28.4	0.34	40	1	98.04	0.0984432	0.426259
1	9.01	212	8	4.3	27.9	0.312	50	1	98.04	0.298804	2.43525
2	9.01	212	8	4.3	27.9	0.312	50	1	98.04	0.298804	1.73306
3	9.01	212	8	4.3	27.9	0.312	50	1	98.04	0.298804	2.22908
4	9.01	212	8	4.3	27.9	0.312	50	1	98.04	0.298804	1.29382
1	10.24	212	3.1	1.2	27.7	0.232	25	2	98.0175	0.232562	0.0744198
2	10.24	212	3.1	1.2	27.7	0.232	25	2	98.0175	0.232562	0.344192
3	10.24	212	3.1	1.2	27.7	0.232	25	2	98.0175	0.232562	0.483729
4	10.24	212	3.1	1.2	27.7	0.232	25	2	98.0175	0.232562	0.35582
5	10.24	212	3.1	1.2	27.7	0.232	25	2	98.0175	0.232562	0.43024
6	10.24	212	3.1	1.2	27.7	0.232	25	2	98.0175	0.232562	0.948853
1	9.7	150	3.6	1.1	25.7	0.063	27	2	89.6453	0.0167125	0.0249016
2	9.7	150	3.6	1.1	25.7	0.063	27	2	89.6453	0.0167125	0.0128686
3	9.7	150	3.6	1.1	25.7	0.063	27	2	89.6453	0.0167125	0.0143727
4	9.7	150	3.6	1.1	25.7	0.063	27	2	89.6453	0.0167125	0.0325894
5	9.7	150	3.6	1.1	25.7	0.063	27	2	89.6453	0.0167125	0.0305839
6	9.7	150	3.6	1.1	25.7	0.063	27	2	89.6453	0.0167125	0.0125344
1	9.7	150	5.1	2.3	27.9	0.258	25	2	89.6453	0.143105	0.213227
2	9.7	150	5.1	2.3	27.9	0.258	25	2	89.6453	0.143105	0.110191
3	9.7	150	5.1	2.3	27.9	0.258	25	2	89.6453	0.143105	0.12307
4	9.7	150	5.1	2.3	27.9	0.258	25	2	89.6453	0.143105	0.279055
5	9.7	150	5.1	2.3	27.9	0.258	25	2	89.6453	0.143105	0.261883
6	9.7	150	5.1	2.3	27.9	0.258	25	2	89.6453	0.143105	0.107329
1	8.49	150	3.6	0.9	27	0.076	13	1	92.037	0.13417	1.10825
2	8.49	150	3.6	0.9	27	0.076	13	1	92.037	0.13417	1.03848
3	8.49	150	3.6	0.9	27	0.076	13	1	92.037	0.13417	1.22632
4	8.49	150	3.6	0.9	27	0.076	13	1	92.037	0.13417	1.3739
5	8.49	150	3.6	0.9	27	0.076	13	1	92.037	0.13417	0.943217
6	8.49	150	3.6	0.9	27	0.076	13	1	92.037	0.13417	0.762087
1	8.49	150	5.8	1.4	27.1	0.103	26	2	92.037	0.282856	2.33639
2	8.49	150	5.8	1.4	27.1	0.103	26	2	92.037	0.282856	2.18931
3	8.49	150	5.8	1.4	27.1	0.103	26	2	92.037	0.282856	2.5853
4	8.49	150	5.8	1.4	27.1	0.103	26	2	92.037	0.282856	2.89645
5	8.49	150	5.8	1.4	27.1	0.103	26	2	92.037	0.282856	1.98848
6	8.49	150	5.8	1.4	27.1	0.103	26	2	92.037	0.282856	1.60662
1	10.06	150	4.5	2.5	27.7	0.24	29	2	80.6301	0.249594	1.09073
2	10.06	150	4.5	2.5	27.7	0.24	29	2	80.6301	0.249594	1.31037
3	10.06	150	4.5	2.5	27.7	0.24	29	2	80.6301	0.249594	1.30288
4	10.06	150	4.5	2.5	27.7	0.24	29	2	80.6301	0.249594	1.19057
5	10.06	150	4.5	2.5	27.7	0.24	29	2	80.6301	0.249594	1.21053
6	10.06	150	4.5	2.5	27.7	0.24	29	2	80.6301	0.249594	1.37027
1	10.06	150	5.8	2.3	29.6	0.475	23	2	80.6301	0.45447	1.98603
2	10.06	150	5.8	2.3	29.6	0.475	23	2	80.6301	0.45447	2.38597
3	10.06	150	5.8	2.3	29.6	0.475	23	2	80.6301	0.45447	2.37233
4	10.06	150	5.8	2.3	29.6	0.475	23	2	80.6301	0.45447	2.16782
5	10.06	150	5.8	2.3	29.6	0.475	23	2	80.6301	0.45447	2.20418
6	10.06	150	5.8	2.3	29.6	0.475	23	2	80.6301	0.45447	2.49504
1	9.75	212	2.5	0.3	26.1	0.062	27	2	96.8784	0.019925	0.0259025
2	9.75	212	2.5	0.3	26.1	0.062	27	2	96.8784	0.019925	0.0783053
3	9.75	212	2.5	0.3	26.1	0.062	27	2	96.8784	0.019925	0.0980311
4	9.75	212	2.5	0.3	26.1	0.062	27	2	96.8784	0.019925	0.0779068
5	9.75	212	2.5	0.3	26.1	0.062	27	2	96.8784	0.019925	0.0543953
6	9.75	212	2.5	0.3	26.1	0.062	27	2	96.8784	0.019925	0.0452298
1	9.66	212	1.7	0.7	29	0.18	28	1	94.8222	0.221363	1.53405
1	9.66	212	1.7	0.7	32	0.18	31	1	94.8222	0.221363	1.53405
1	8.97	212	3.7	3.1	27.2	0.177	27	2	94.8112	0.458473	0.724387
2	8.97	212	3.7	3.1	27.2	0.177	27	2	94.8112	0.458473	2.4024
3	8.97	212	3.7	3.1	27.2	0.177	27	2	94.8112	0.458473	1.87057
4	8.97	212	3.7	3.1	27.2	0.177	27	2	94.8112	0.458473	1.45336
5	8.97	212	3.7	3.1	27.2	0.177	27	2	94.8112	0.458473	1.7101
6	8.97	212	3.7	3.1	27.2	0.177	27	2	94.8112	0.458473	1.34332
1	9.87	212	4.8	2.6	27.7	0.339	27	2	96.0274	0.390761	1.21136
2	9.87	212	4.8	2.6	27.7	0.339	27	2	96.0274	0.390761	0.91438
3	9.87	212	4.8	2.6	27.7	0.339	27	2	96.0274	0.390761	0.53925
4	9.87	212	4.8	2.6	27.7	0.339	27	2	96.0274	0.390761	0.55488
5	9.87	212	4.8	2.6	27.7	0.339	27	2	96.0274	0.390761	0.605679
6	9.87	212	4.8	2.6	27.7	0.339	27	2	96.0274	0.390761	0.664293
1	8.52	150	4.4	2.1	28.2	0.349	23	2	91.3753	0.429299	4.64502
2	8.52	150	4.4	2.1	28.2	0.349	23	2	91.3753	0.429299	4.64073
3	8.52	150	4.4	2.1	28.2	0.349	23	2	91.3753	0.429299	4.00966
4	8.52	150	4.4	2.1	28.2	0.349	23	2	91.3753	0.429299	4.94553
5	8.52	150	4.4	2.1	28.2	0.349	23	2	91.3753	0.429299	5.28468
6	8.52	150	4.4	2.1	28.2	0.349	23	2	91.3753	0.429299	6.62409
1	8.52	150	4.8	1.1	28.4	0.358	23	2	91.3753	0.23067	2.49585
2	8.52	150	4.8	1.1	28.4	0.358	23	2	91.3753	0.23067	2.49354
3	8.52	150	4.8	1.1	28.4	0.358	23	2	91.3753	0.23067	2.15446
4	8.52	150	4.8	1.1	28.4	0.358	23	2	91.3753	0.23067	2.65732
5	8.52	150	4.8	1.1	28.4	0.358	23	2	91.3753	0.23067	2.83955
6	8.52	150	4.8	1.1	28.4	0.358	23	2	91.3753	0.23067	3.55924
1	9.7	150	8.5	3.5	28.1	0.369	23	2	94.0341	0.503234	2.82314
2	9.7	150	8.5	3.5	28.1	0.369	23	2	94.0341	0.503234	2.91373
3	9.7	150	8.5	3.5	28.1	0.369	23	2	94.0341	0.503234	2.92882
4	9.7	150	8.5	3.5	28.1	0.369	23	2	94.0341	0.503234	2.95902
5	9.7	150	8.5	3.5	28.1	0.369	23	2	94.0341	0.503234	3.26599
6	9.7	150	8.5	3.5	28.1	0.369	23	2	94.0341	0.503234	2.84831
1	9.7	150	4.1	1.4	26.9	0.104	25	2	94.0341	0.0567332	0.318273
2	9.7	150	4.1	1.4	26.9	0.104	25	2	94.0341	0.0567332	0.328485
3	9.7	150	4.1	1.4	26.9	0.104	25	2	94.0341	0.0567332	0.330187
4	9.7	150	4.1	1.4	26.9	0.104	25	2	94.0341	0.0567332	0.333591
5	9.7	150	4.1	1.4	26.9	0.104	25	2	94.0341	0.0567332	0.368198
6	9.7	150	4.1	1.4	26.9	0.104	25	2	94.0341	0.0567332	0.32111
1	11.52	150	5.1	2	29	0.417	25	2	95.0263	0.567347	0.760245
2	11.52	150	5.1	2	29	0.417	25	2	95.0263	0.567347	0.765918
3	11.52	150	5.1	2	29	0.417	25	2	95.0263	0.567347	0.595714
4	11.52	150	5.1	2	29	0.417	25	2	95.0263	0.567347	0.675143
5	11.52	150	5.1	2	29	0.417	25	2	95.0263	0.567347	1.12335
6	11.52	150	5.1	2	29	0.417	25	2	95.0263	0.567347	1.19143
1	11.52	150	5.1	2	34	0.417	44	1	0	0.567347	1.82686
2	11.52	150	5.1	2	34	0.417	44	1	0	0.567347	2.07649
3	11.52	150	5.1	2	34	0.417	44	1	0	0.567347	2.01408
4	11.52	150	5.1	2	34	0.417	44	1	0	0.567347	1.90061
5	11.52	150	5.1	2	34	0.417	44	1	0	0.567347	1.77012
6	11.52	150	5.1	2	34	0.417	44	1	0	0.567347	1.63396
1	9.7	150	5.2	1.9	27.9	0.301	25	2	90.0955	0.284967	1.86653
2	9.7	150	5.2	1.9	27.9	0.301	25	2	90.0955	0.284967	2.14295
3	9.7	150	5.2	1.9	27.9	0.301	25	2	90.0955	0.284967	1.78389
4	9.7	150	5.2	1.9	27.9	0.301	25	2	90.0955	0.284967	1.40204
5	9.7	150	5.2	1.9	27.9	0.301	25	2	90.0955	0.284967	1.03443
6	9.7	150	5.2	1.9	27.9	0.301	25	2	90.0955	0.284967	1.03443
1	9.7	150	5.1	2.9	28.1	0.349	25	2	90.0955	0.50431	3.30323
2	9.7	150	5.1	2.9	28.1	0.349	25	2	90.0955	0.50431	3.79241
3	9.7	150	5.1	2.9	28.1	0.349	25	2	90.0955	0.50431	3.15698
4	9.7	150	5.1	2.9	28.1	0.349	25	2	90.0955	0.50431	2.48121
5	9.7	150	5.1	2.9	28.1	0.349	25	2	90.0955	0.50431	1.83065
6	9.7	150	5.1	2.9	28.1	0.349	25	2	90.0955	0.50431	1.83065
1	9.7	150	5.5	1.3	29.3	0.311	25	2	90.0955	0.201455	1.31953
2	9.7	150	5.5	1.3	29.3	0.311	25	2	90.0955	0.201455	1.51494
3	9.7	150	5.5	1.3	29.3	0.311	25	2	90.0955	0.201455	1.26111
4	9.7	150	5.5	1.3	29.3	0.311	25	2	90.0955	0.201455	0.991159
5	9.7	150	5.5	1.3	29.3	0.311	25	2	90.0955	0.201455	0.731282
6	9.7	150	5.5	1.3	29.3	0.311	25	2	90.0955	0.201455	0.731282
1	8.52	150	5.2	1.5	27.7	0.337	23	2	95.7424	0.832647	3.76356
2	8.52	150	5.2	1.5	27.7	0.337	23	2	95.7424	0.832647	3.18904
3	8.52	150	5.2	1.5	27.7	0.337	23	2	95.7424	0.832647	3.04749
4	8.52	150	5.2	1.5	27.7	0.337	23	2	95.7424	0.832647	3.08912
5	8.52	150	5.2	1.5	27.7	0.337	23	2	95.7424	0.832647	3.78854
6	8.52	150	5.2	1.5	27.7	0.337	23	2	95.7424	0.832647	3.2723
1	9.27	106	5.4	1.1	25.7	0.083	17	2	98.2188	0.418615	1.66609
2	9.27	106	5.4	1.1	25.7	0.083	17	2	98.2188	0.418615	0.259541
3	9.27	106	5.4	1.1	25.7	0.083	17	2	98.2188	0.418615	0.226052
4	9.27	106	5.4	1.1	25.7	0.083	17	2	98.2188	0.418615	0.439546
5	9.27	106	5.4	1.1	25.7	0.083	17	2	98.2188	0.418615	0.640481
6	9.27	106	5.4	1.1	25.7	0.083	17	2	98.2188	0.418615	0.16326
1	9.7	150	5.7	2.9	28.4	0.323	23	2	84.4746	0.370223	4.51671
2	9.7	150	5.7	2.9	28.4	0.323	23	2	84.4746	0.370223	2.86182
3	9.7	150	5.7	2.9	28.4	0.323	23	2	84.4746	0.370223	5.14239
4	9.7	150	5.7	2.9	28.4	0.323	23	2	84.4746	0.370223	6.53443
5	9.7	150	5.7	2.9	28.4	0.323	23	2	84.4746	0.370223	1.73264
6	9.7	150	5.7	2.9	28.4	0.323	23	2	84.4746	0.370223	1.92516
1	9.7	150	3.3	1.8	25.6	0.095	25	2	84.4746	0.0675863	0.824552
2	9.7	150	3.3	1.8	25.6	0.095	25	2	84.4746	0.0675863	0.522442
3	9.7	150	3.3	1.8	25.6	0.095	25	2	84.4746	0.0675863	0.938773
4	9.7	150	3.3	1.8	25.6	0.095	25	2	84.4746	0.0675863	1.1929
5	9.7	150	3.3	1.8	25.6	0.095	25	2	84.4746	0.0675863	0.316304
6	9.7	150	3.3	1.8	25.6	0.095	25	2	84.4746	0.0675863	0.351449
1	11.03	212	2.3	0.4	25.3	0.079	27	2	97.6568	0.0292322	0.0584644
2	11.03	212	2.3	0.4	25.3	0.079	27	2	97.6568	0.0292322	0.0871119
3	11.03	212	2.3	0.4	25.3	0.079	27	2	97.6568	0.0292322	0.0768807
4	11.03	212	2.3	0.4	25.3	0.079	27	2	97.6568	0.0292322	0.0555412
5	11.03	212	2.3	0.4	25.3	0.079	27	2	97.6568	0.0292322	0.042679
6	11.03	212	2.3	0.4	25.3	0.079	27	2	97.6568	0.0292322	0.0324477
1	9.87	212	6.4	3.3	28.2	0.343	45	1	34.0789	0.207555	1.32835
2	9.87	212	6.4	3.3	28.2	0.343	45	1	34.0789	0.207555	0.406807
3	9.87	212	6.4	3.3	28.2	0.343	45	1	34.0789	0.207555	3.11332
4	9.87	212	6.4	3.3	28.2	0.343	45	1	34.0789	0.207555	3.55126
5	9.87	212	6.4	3.3	28.2	0.343	45	1	34.0789	0.207555	3.13615
6	9.87	212	6.4	3.3	28.2	0.343	45	1	34.0789	0.207555	4.99999
1	9.87	212	4.5	2.9	28.7	0.229	45	1	34.0789	0.121775	0.77936
2	9.87	212	4.5	2.9	28.7	0.229	45	1	34.0789	0.121775	0.238679
3	9.87	212	4.5	2.9	28.7	0.229	45	1	34.0789	0.121775	1.82663
4	9.87	212	4.5	2.9	28.7	0.229	45	1	34.0789	0.121775	2.08357
5	9.87	212	4.5	2.9	28.7	0.229	45	1	34.0789	0.121775	1.84002
6	9.87	212	4.5	2.9	28.7	0.229	45	1	34.0789	0.121775	2.93356
1	9.87	212	7.9	4.7	28.2	0.338	45	1	34.0789	0.291299	1.86431
2	9.87	212	7.9	4.7	28.2	0.338	45	1	34.0789	0.291299	0.570946
3	9.87	212	7.9	4.7	28.2	0.338	45	1	34.0789	0.291299	4.36949
4	9.87	212	7.9	4.7	28.2	0.338	45	1	34.0789	0.291299	4.98413
5	9.87	212	7.9	4.7	28.2	0.338	45	1	34.0789	0.291299	4.40153
6	9.87	212	7.9	4.7	28.2	0.338	45	1	34.0789	0.291299	7.0174
1	9.81	150	6.7	3.7	27.7	0.376	23	2	93.9868	0.848758	2.2577
2	9.81	150	6.7	3.7	27.7	0.376	23	2	93.9868	0.848758	3.17436
3	9.81	150	6.7	3.7	27.7	0.376	23	2	93.9868	0.848758	3.23377
4	9.81	150	6.7	3.7	27.7	0.376	23	2	93.9868	0.848758	2.054
5	9.81	150	6.7	3.7	27.7	0.376	23	2	93.9868	0.848758	1.94366
6	9.81	150	6.7	3.7	27.7	0.376	23	2	93.9868	0.848758	2.30862
1	9.81	150	5.5	0.7	26.9	0.102	25	2	90.1538	0.270557	0.865782
2	9.81	150	5.5	0.7	26.9	0.102	25	2	90.1538	0.270557	1.00918
3	9.81	150	5.5	0.7	26.9	0.102	25	2	90.1538	0.270557	0.876605
4	9.81	150	5.5	0.7	26.9	0.102	25	2	90.1538	0.270557	1.04976
5	9.81	150	5.5	0.7	26.9	0.102	25	2	90.1538	0.270557	0.876605
6	9.81	150	5.5	0.7	26.9	0.102	25	2	90.1538	0.270557	0.505942
1	8.35	150	3.2	0.6	27.7	0.163	25	2	91.5989	0.0718959	0.598174
2	8.35	150	3.2	0.6	27.7	0.163	25	2	91.5989	0.0718959	0.708175
3	8.35	150	3.2	0.6	27.7	0.163	25	2	91.5989	0.0718959	0.512618
4	8.35	150	3.2	0.6	27.7	0.163	25	2	91.5989	0.0718959	0.35948
5	8.35	150	3.2	0.6	27.7	0.163	25	2	91.5989	0.0718959	0.280394
6	8.35	150	3.2	0.6	27.7	0.163	25	2	91.5989	0.0718959	0.185491
1	8.35	150	5.4	1.9	28.6	0.303	23	2	91.5989	0.423215	3.52115
2	8.35	150	5.4	1.9	28.6	0.303	23	2	91.5989	0.423215	4.16867
3	8.35	150	5.4	1.9	28.6	0.303	23	2	91.5989	0.423215	3.01753
4	8.35	150	5.4	1.9	28.6	0.303	23	2	91.5989	0.423215	2.11608
5	8.35	150	5.4	1.9	28.6	0.303	23	2	91.5989	0.423215	1.65054
6	8.35	150	5.4	1.9	28.6	0.303	23	2	91.5989	0.423215	1.0919
1	10.23	150	4.3	0.8	32	0.088	25	2	94.2113	0.0489195	0.276395
2	10.23	150	4.3	0.8	32	0.088	25	2	94.2113	0.0489195	0.249
3	10.23	150	4.3	0.8	32	0.088	25	2	94.2113	0.0489195	0.34635
4	10.23	150	4.3	0.8	32	0.088	25	2	94.2113	0.0489195	0.40065
5	10.23	150	4.3	0.8	32	0.088	25	2	94.2113	0.0489195	0.378637
6	10.23	150	4.3	0.8	32	0.088	25	2	94.2113	0.0489195	0.386953
1	10.23	150	3.9	1.3	32	0.197	25	2	94.2113	0.177958	1.00547
2	10.23	150	3.9	1.3	32	0.197	25	2	94.2113	0.177958	0.905808
3	10.23	150	3.9	1.3	32	0.197	25	2	94.2113	0.177958	1.25995
4	10.23	150	3.9	1.3	32	0.197	25	2	94.2113	0.177958	1.45748
5	10.23	150	3.9	1.3	32	0.197	25	2	94.2113	0.177958	1.3774
6	10.23	150	3.9	1.3	32	0.197	25	2	94.2113	0.177958	1.40765
1	9.79	150	3.1	1.8	27.7	0.238	23	2	83.1449	0.571734	7.03232
2	9.79	150	3.1	1.8	27.7	0.238	23	2	83.1449	0.571734	5.75164
3	9.79	150	3.1	1.8	27.7	0.238	23	2	83.1449	0.571734	6.08325
4	9.79	150	3.1	1.8	27.7	0.238	23	2	83.1449	0.571734	3.86492
5	9.79	150	3.1	1.8	27.7	0.238	23	2	83.1449	0.571734	2.54421
6	9.79	150	3.1	1.8	27.7	0.238	23	2	83.1449	0.571734	3.6934
1	9.79	150	3.2	0.6	26.3	0.156	23	2	83.1449	0.124917	1.53647
2	9.79	150	3.2	0.6	26.3	0.156	23	2	83.1449	0.124917	1.25666
3	9.79	150	3.2	0.6	26.3	0.156	23	2	83.1449	0.124917	1.32911
4	9.79	150	3.2	0.6	26.3	0.156	23	2	83.1449	0.124917	0.844436
5	9.79	150	3.2	0.6	26.3	0.156	23	2	83.1449	0.124917	0.555879
6	9.79	150	3.2	0.6	26.3	0.156	23	2	83.1449	0.124917	0.806961
1	9.87	212	4	1.9	27.7	0.297	29	2	93.2034	0.361638	2.01432
2	9.87	212	4	1.9	27.7	0.297	29	2	93.2034	0.361638	2.61464
3	9.87	212	4	1.9	27.7	0.297	29	2	93.2034	0.361638	2.23492
4	9.87	212	4	1.9	27.7	0.297	29	2	93.2034	0.361638	2.22769
5	9.87	212	4	1.9	27.7	0.297	29	2	93.2034	0.361638	1.84074
6	9.87	212	4	1.9	27.7	0.297	29	2	93.2034	0.361638	1.76841
1	9.87	212	3.1	1.4	27.5	0.155	29	2	93.2034	0.139067	0.774603
2	9.87	212	3.1	1.4	27.5	0.155	29	2	93.2034	0.139067	1.00545
3	9.87	212	3.1	1.4	27.5	0.155	29	2	93.2034	0.139067	0.859433
4	9.87	212	3.1	1.4	27.5	0.155	29	2	93.2034	0.139067	0.856652
5	9.87	212	3.1	1.4	27.5	0.155	29	2	93.2034	0.139067	0.707851
6	9.87	212	3.1	1.4	27.5	0.155	29	2	93.2034	0.139067	0.680037
1	10.02	212	5.8	3.8	28.2	0.334	25	2	96.1812	0.445255	1.26452
2	10.02	212	5.8	3.8	28.2	0.334	25	2	96.1812	0.445255	1.3981
3	10.02	212	5.8	3.8	28.2	0.334	25	2	96.1812	0.445255	1.20219
4	10.02	212	5.8	3.8	28.2	0.334	25	2	96.1812	0.445255	1.02854
5	10.02	212	5.8	3.8	28.2	0.334	25	2	96.1812	0.445255	1.11314
6	10.02	212	5.8	3.8	28.2	0.334	25	2	96.1812	0.445255	1.01963
1	10.02	212	4.2	2.1	27.7	0.327	25	2	96.1812	0.240905	0.68417
2	10.02	212	4.2	2.1	27.7	0.327	25	2	96.1812	0.240905	0.756442
3	10.02	212	4.2	2.1	27.7	0.327	25	2	96.1812	0.240905	0.650444
4	10.02	212	4.2	2.1	27.7	0.327	25	2	96.1812	0.240905	0.556491
5	10.02	212	4.2	2.1	27.7	0.327	25	2	96.1812	0.240905	0.602263
6	10.02	212	4.2	2.1	27.7	0.327	25	2	96.1812	0.240905	0.551673
1	8.52	150	4.7	0.2	23	0.062	23	2	93.1376	0.0184881	0.15567
2	8.52	150	4.7	0.2	23	0.062	23	2	93.1376	0.0184881	0.203739
3	8.52	150	4.7	0.2	23	0.062	23	2	93.1376	0.0184881	0.19468
[truncated: 2,117 more rows]
