# Supplementary material for: Data-driven intelligent productivity prediction model for horizontal fracture stimulation
Source: Frontiers journal article supplement (doi:10.3389/feart.2025.1601363), 2025-08-01
Supplement: Table_3.xlsx [file Table_3.xlsx]

## Sheet: sheet1
Post-fracture duration(mon)	present fomraiton pressure(MPa)	well spacing(m)	depth at the top(m)	oil bed depth(m)	Depth of the central part of the oil layer(m)	Sandstone thickness(m)	Effective thickness(m)	Porosity(%)	permeability(μm)	Breakdown pressure(MPa)	Total liquid volume(m^3)	quantity of sand added(m^3)	Number of fracture slits (slits)	Daily oil production from small layer before fracking(t/day)	pre-fracture water content(%)	Production capacity splitting factor(1)	sand mixing ratio	Daily oil increase(t)
1	9.83	175	918.8	929.3	924.05	6	1.6	28.1	0.313	19	337.32	56	2	0.359166	90.3658	0.089123	24.94	0.341341
2	9.83	175	918.8	929.3	924.05	6	1.6	28.1	0.313	19	337.32	56	2	0.359166	90.3658	0.089123	24.94	0.671987
3	9.83	175	918.8	929.3	924.05	6	1.6	28.1	0.313	19	337.32	56	2	0.359166	90.3658	0.089123	24.94	0.622079
4	9.83	175	918.8	929.3	924.05	6	1.6	28.1	0.313	19	337.32	56	2	0.359166	90.3658	0.089123	24.94	0.648815
5	9.83	175	918.8	929.3	924.05	6	1.6	28.1	0.313	19	337.32	56	2	0.359166	90.3658	0.089123	24.94	0.651489
6	9.83	175	918.8	929.3	924.05	6	1.6	28.1	0.313	19	337.32	56	2	0.359166	90.3658	0.089123	24.94	0.936683
7	9.83	175	918.8	929.3	924.05	6	1.6	28.1	0.313	19	337.32	56	2	0.359166	90.3658	0.089123	24.94	1.04274
8	9.83	175	918.8	929.3	924.05	6	1.6	28.1	0.313	19	337.32	56	2	0.359166	90.3658	0.089123	24.94	1.08017
9	9.83	175	918.8	929.3	924.05	6	1.6	28.1	0.313	19	337.32	56	2	0.359166	90.3658	0.089123	24.94	1.00531
10	9.83	175	918.8	929.3	924.05	6	1.6	28.1	0.313	19	337.32	56	2	0.359166	90.3658	0.089123	24.94	1.15949
11	9.83	175	918.8	929.3	924.05	6	1.6	28.1	0.313	19	337.32	56	2	0.359166	90.3658	0.089123	24.94	0.60871
12	9.83	175	918.8	929.3	924.05	6	1.6	28.1	0.313	19	337.32	56	2	0.359166	90.3658	0.089123	24.94	0.598907
1	8.83	175	914.3	926	920.15	9.9	4.5	30.4	0.7	28	335.76	46	2	4.59375	85.6205	0.911458	25	0.966146
2	8.83	175	914.3	926	920.15	9.9	4.5	30.4	0.7	28	335.76	46	2	4.59375	85.6205	0.911458	25	0.610677
1	11.91	125	1095.7	1099.7	1097.7	3	1.3	30.6	0.479	48	182.2	29	2	0	0	0.126419	25.07	0.725643
2	11.91	125	1095.7	1099.7	1097.7	3	1.3	30.6	0.479	48	182.2	29	2	0	0	0.126419	25.07	0.476598
3	11.91	125	1095.7	1099.7	1097.7	3	1.3	30.6	0.479	48	182.2	29	2	0	0	0.126419	25.07	0.487976
4	11.91	125	1095.7	1099.7	1097.7	3	1.3	30.6	0.479	48	182.2	29	2	0	0	0.126419	25.07	0.150438
5	11.91	125	1095.7	1099.7	1097.7	3	1.3	30.6	0.479	48	182.2	29	2	0	0	0.126419	25.07	0.126419
6	11.91	125	1095.7	1099.7	1097.7	3	1.3	30.6	0.479	48	182.2	29	2	0	0	0.126419	25.07	0.0594167
7	11.91	125	1095.7	1099.7	1097.7	3	1.3	30.6	0.479	48	182.2	29	2	0	0	0.126419	25.07	0.112513
8	11.91	125	1095.7	1099.7	1097.7	3	1.3	30.6	0.479	48	182.2	29	2	0	0	0.126419	25.07	0.068266
9	11.91	125	1095.7	1099.7	1097.7	3	1.3	30.6	0.479	48	182.2	29	2	0	0	0.126419	25.07	0.140325
10	11.91	125	1095.7	1099.7	1097.7	3	1.3	30.6	0.479	48	182.2	29	2	0	0	0.126419	25.07	0.135268
11	11.91	125	1095.7	1099.7	1097.7	3	1.3	30.6	0.479	48	182.2	29	2	0	0	0.126419	25.07	0.140325
12	11.91	125	1095.7	1099.7	1097.7	3	1.3	30.6	0.479	48	182.2	29	2	0	0	0.126419	25.07	0.12389
1	11.72	125	1049.3	1054.1	1051.7	3.1	1.7	28.4	0.517	38	85.26	12	2	0.146492	96.3445	0.0915578	25	0.228895
2	11.72	125	1049.3	1054.1	1051.7	3.1	1.7	28.4	0.517	38	85.26	12	2	0.146492	96.3445	0.0915578	25	0.351582
3	11.72	125	1049.3	1054.1	1051.7	3.1	1.7	28.4	0.517	38	85.26	12	2	0.146492	96.3445	0.0915578	25	0.349751
4	11.72	125	1049.3	1054.1	1051.7	3.1	1.7	28.4	0.517	38	85.26	12	2	0.146492	96.3445	0.0915578	25	0.257277
5	11.72	125	1049.3	1054.1	1051.7	3.1	1.7	28.4	0.517	38	85.26	12	2	0.146492	96.3445	0.0915578	25	0.206921
6	11.72	125	1049.3	1054.1	1051.7	3.1	1.7	28.4	0.517	38	85.26	12	2	0.146492	96.3445	0.0915578	25	0.120856
7	11.72	125	1049.3	1054.1	1051.7	3.1	1.7	28.4	0.517	38	85.26	12	2	0.146492	96.3445	0.0915578	25	0.100714
8	11.72	125	1049.3	1054.1	1051.7	3.1	1.7	28.4	0.517	38	85.26	12	2	0.146492	96.3445	0.0915578	25	0.0961357
9	11.72	125	1049.3	1054.1	1051.7	3.1	1.7	28.4	0.517	38	85.26	12	2	0.146492	96.3445	0.0915578	25	0.137337
10	11.72	125	1049.3	1054.1	1051.7	3.1	1.7	28.4	0.517	38	85.26	12	2	0.146492	96.3445	0.0915578	25	0.102545
11	11.72	125	1049.3	1054.1	1051.7	3.1	1.7	28.4	0.517	38	85.26	12	2	0.146492	96.3445	0.0915578	25	0.130928
12	11.72	125	1049.3	1054.1	1051.7	3.1	1.7	28.4	0.517	38	85.26	12	2	0.146492	96.3445	0.0915578	25	0.0814864
1	11.72	125	1056.5	1061.5	1059	4	2.8	27.6	0.252	35	85.26	12	2	0.117607	96.3445	0.0735046	25	0.183761
2	11.72	125	1056.5	1061.5	1059	4	2.8	27.6	0.252	35	85.26	12	2	0.117607	96.3445	0.0735046	25	0.282258
3	11.72	125	1056.5	1061.5	1059	4	2.8	27.6	0.252	35	85.26	12	2	0.117607	96.3445	0.0735046	25	0.280788
4	11.72	125	1056.5	1061.5	1059	4	2.8	27.6	0.252	35	85.26	12	2	0.117607	96.3445	0.0735046	25	0.206548
5	11.72	125	1056.5	1061.5	1059	4	2.8	27.6	0.252	35	85.26	12	2	0.117607	96.3445	0.0735046	25	0.16612
6	11.72	125	1056.5	1061.5	1059	4	2.8	27.6	0.252	35	85.26	12	2	0.117607	96.3445	0.0735046	25	0.0970261
7	11.72	125	1056.5	1061.5	1059	4	2.8	27.6	0.252	35	85.26	12	2	0.117607	96.3445	0.0735046	25	0.0808551
8	11.72	125	1056.5	1061.5	1059	4	2.8	27.6	0.252	35	85.26	12	2	0.117607	96.3445	0.0735046	25	0.0771798
9	11.72	125	1056.5	1061.5	1059	4	2.8	27.6	0.252	35	85.26	12	2	0.117607	96.3445	0.0735046	25	0.110257
10	11.72	125	1056.5	1061.5	1059	4	2.8	27.6	0.252	35	85.26	12	2	0.117607	96.3445	0.0735046	25	0.0823251
11	11.72	125	1056.5	1061.5	1059	4	2.8	27.6	0.252	35	85.26	12	2	0.117607	96.3445	0.0735046	25	0.105112
12	11.72	125	1056.5	1061.5	1059	4	2.8	27.6	0.252	35	85.26	12	2	0.117607	96.3445	0.0735046	25	0.0654191
4	11.4	125	1055.9	1061.5	1058.7	4.6	1.5	29.4	0.27	46	0	29	2	0.647068	93.6887	0.200953	25	2.84348
5	11.4	125	1055.9	1061.5	1058.7	4.6	1.5	29.4	0.27	46	0	29	2	0.647068	93.6887	0.200953	25	0.371762
6	11.4	125	1055.9	1061.5	1058.7	4.6	1.5	29.4	0.27	46	0	29	2	0.647068	93.6887	0.200953	25	0.659125
7	11.4	125	1055.9	1061.5	1058.7	4.6	1.5	29.4	0.27	46	0	29	2	0.647068	93.6887	0.200953	25	0.231096
8	11.4	125	1055.9	1061.5	1058.7	4.6	1.5	29.4	0.27	46	0	29	2	0.647068	93.6887	0.200953	25	0.440086
9	11.4	125	1055.9	1061.5	1058.7	4.6	1.5	29.4	0.27	46	0	29	2	0.647068	93.6887	0.200953	25	0.3376
10	11.4	125	1055.9	1061.5	1058.7	4.6	1.5	29.4	0.27	46	0	29	2	0.647068	93.6887	0.200953	25	0.148705
11	11.4	125	1055.9	1061.5	1058.7	4.6	1.5	29.4	0.27	46	0	29	2	0.647068	93.6887	0.200953	25	0.146695
12	11.4	125	1055.9	1061.5	1058.7	4.6	1.5	29.4	0.27	46	0	29	2	0.647068	93.6887	0.200953	25	0.0643049
1	10.8	125	1098.5	1112	1105.25	11.5	7.9	31.6	0.652	44	107.04	23	2	2.4411	80.8707	0.841758	25.17	2.64312
2	10.8	125	1098.5	1112	1105.25	11.5	7.9	31.6	0.652	44	107.04	23	2	2.4411	80.8707	0.841758	25.17	6.80982
3	10.8	125	1098.5	1112	1105.25	11.5	7.9	31.6	0.652	44	107.04	23	2	2.4411	80.8707	0.841758	25.17	6.76773
4	10.8	125	1098.5	1112	1105.25	11.5	7.9	31.6	0.652	44	107.04	23	2	2.4411	80.8707	0.841758	25.17	5.25257
5	10.8	125	1098.5	1112	1105.25	11.5	7.9	31.6	0.652	44	107.04	23	2	2.4411	80.8707	0.841758	25.17	5.21048
6	10.8	125	1098.5	1112	1105.25	11.5	7.9	31.6	0.652	44	107.04	23	2	2.4411	80.8707	0.841758	25.17	5.62294
7	10.8	125	1098.5	1112	1105.25	11.5	7.9	31.6	0.652	44	107.04	23	2	2.4411	80.8707	0.841758	25.17	4.46132
8	10.8	125	1098.5	1112	1105.25	11.5	7.9	31.6	0.652	44	107.04	23	2	2.4411	80.8707	0.841758	25.17	4.4529
9	10.8	125	1098.5	1112	1105.25	11.5	7.9	31.6	0.652	44	107.04	23	2	2.4411	80.8707	0.841758	25.17	4.52866
10	10.8	125	1098.5	1112	1105.25	11.5	7.9	31.6	0.652	44	107.04	23	2	2.4411	80.8707	0.841758	25.17	3.90576
11	10.8	125	1098.5	1112	1105.25	11.5	7.9	31.6	0.652	44	107.04	23	2	2.4411	80.8707	0.841758	25.17	3.23235
12	10.8	125	1098.5	1112	1105.25	11.5	7.9	31.6	0.652	44	107.04	23	2	2.4411	80.8707	0.841758	25.17	3.70373
1	10.8	125	1138.5	1147.7	1143.1	7.9	2.1	29.6	0.515	25	296.28	49	2	0.334876	97.5341	0.185014	24.96	0.323775
2	10.8	125	1138.5	1147.7	1143.1	7.9	2.1	29.6	0.515	25	296.28	49	2	0.334876	97.5341	0.185014	24.96	0.370028
3	10.8	125	1138.5	1147.7	1143.1	7.9	2.1	29.6	0.515	25	296.28	49	2	0.334876	97.5341	0.185014	24.96	0.26827
4	10.8	125	1138.5	1147.7	1143.1	7.9	2.1	29.6	0.515	25	296.28	49	2	0.334876	97.5341	0.185014	24.96	0.344126
5	10.8	125	1138.5	1147.7	1143.1	7.9	2.1	29.6	0.515	25	296.28	49	2	0.334876	97.5341	0.185014	24.96	0.51804
6	10.8	125	1138.5	1147.7	1143.1	7.9	2.1	29.6	0.515	25	296.28	49	2	0.334876	97.5341	0.185014	24.96	0.52544
7	10.8	125	1138.5	1147.7	1143.1	7.9	2.1	29.6	0.515	25	296.28	49	2	0.334876	97.5341	0.185014	24.96	0.307123
8	10.8	125	1138.5	1147.7	1143.1	7.9	2.1	29.6	0.515	25	296.28	49	2	0.334876	97.5341	0.185014	24.96	0.334876
9	10.8	125	1138.5	1147.7	1143.1	7.9	2.1	29.6	0.515	25	296.28	49	2	0.334876	97.5341	0.185014	24.96	0.209066
10	10.8	125	1138.5	1147.7	1143.1	7.9	2.1	29.6	0.515	25	296.28	49	2	0.334876	97.5341	0.185014	24.96	0.157262
11	10.8	125	1138.5	1147.7	1143.1	7.9	2.1	29.6	0.515	25	296.28	49	2	0.334876	97.5341	0.185014	24.96	0.0499538
1	10.8	200	1140.2	1148.5	1144.35	7.2	4.7	29	1.216	31	78.54	12	2	1.66238	97.6899	0.773202	25	5.3119
2	10.8	200	1140.2	1148.5	1144.35	7.2	4.7	29	1.216	31	78.54	12	2	1.66238	97.6899	0.773202	25	1.44589
3	10.8	200	1140.2	1148.5	1144.35	7.2	4.7	29	1.216	31	78.54	12	2	1.66238	97.6899	0.773202	25	1.19846
4	10.8	200	1140.2	1148.5	1144.35	7.2	4.7	29	1.216	31	78.54	12	2	1.66238	97.6899	0.773202	25	1.99486
5	10.8	200	1140.2	1148.5	1144.35	7.2	4.7	29	1.216	31	78.54	12	2	1.66238	97.6899	0.773202	25	1.15207
6	10.8	200	1140.2	1148.5	1144.35	7.2	4.7	29	1.216	31	78.54	12	2	1.66238	97.6899	0.773202	25	1.60826
7	10.8	200	1140.2	1148.5	1144.35	7.2	4.7	29	1.216	31	78.54	12	2	1.66238	97.6899	0.773202	25	1.39176
8	10.8	200	1140.2	1148.5	1144.35	7.2	4.7	29	1.216	31	78.54	12	2	1.66238	97.6899	0.773202	25	0.750006
9	10.8	200	1140.2	1148.5	1144.35	7.2	4.7	29	1.216	31	78.54	12	2	1.66238	97.6899	0.773202	25	1.11341
10	10.8	200	1140.2	1148.5	1144.35	7.2	4.7	29	1.216	31	78.54	12	2	1.66238	97.6899	0.773202	25	0.162372
1	11.72	125	1037.1	1045.8	1041.45	6.2	3	31.6	0.63	26	225.14	37	2	0.252103	95.9821	0.700285	25.03	0.994405
2	11.72	125	1037.1	1045.8	1041.45	6.2	3	31.6	0.63	26	225.14	37	2	0.252103	95.9821	0.700285	25.03	0.826337
3	11.72	125	1037.1	1045.8	1041.45	6.2	3	31.6	0.63	26	225.14	37	2	0.252103	95.9821	0.700285	25.03	1.10645
4	11.72	125	1037.1	1045.8	1041.45	6.2	3	31.6	0.63	26	225.14	37	2	0.252103	95.9821	0.700285	25.03	1.77172
5	11.72	125	1037.1	1045.8	1041.45	6.2	3	31.6	0.63	26	225.14	37	2	0.252103	95.9821	0.700285	25.03	2.56304
6	11.72	125	1037.1	1045.8	1041.45	6.2	3	31.6	0.63	26	225.14	37	2	0.252103	95.9821	0.700285	25.03	3.34036
7	11.72	125	1037.1	1045.8	1041.45	6.2	3	31.6	0.63	26	225.14	37	2	0.252103	95.9821	0.700285	25.03	3.1863
8	11.72	125	1037.1	1045.8	1041.45	6.2	3	31.6	0.63	26	225.14	37	2	0.252103	95.9821	0.700285	25.03	2.66108
9	11.72	125	1037.1	1045.8	1041.45	6.2	3	31.6	0.63	26	225.14	37	2	0.252103	95.9821	0.700285	25.03	1.85576
10	11.72	125	1037.1	1045.8	1041.45	6.2	3	31.6	0.63	26	225.14	37	2	0.252103	95.9821	0.700285	25.03	1.76472
11	11.72	125	1037.1	1045.8	1041.45	6.2	3	31.6	0.63	26	225.14	37	2	0.252103	95.9821	0.700285	25.03	2.13587
12	11.72	125	1037.1	1045.8	1041.45	6.2	3	31.6	0.63	26	225.14	37	2	0.252103	95.9821	0.700285	25.03	1.70169
1	10.48	175	909.4	915.9	912.65	4.5	2.1	29.8	0.477	30	129	20	2	3.24009	85.8151	0.413277	25.13	1.73989
2	10.48	175	909.4	915.9	912.65	4.5	2.1	29.8	0.477	30	129	20	2	3.24009	85.8151	0.413277	25.13	0.863748
3	10.48	175	909.4	915.9	912.65	4.5	2.1	29.8	0.477	30	129	20	2	3.24009	85.8151	0.413277	25.13	1.28942
4	10.48	175	909.4	915.9	912.65	4.5	2.1	29.8	0.477	30	129	20	2	3.24009	85.8151	0.413277	25.13	2.4342
5	10.48	175	909.4	915.9	912.65	4.5	2.1	29.8	0.477	30	129	20	2	3.24009	85.8151	0.413277	25.13	1.66137
6	10.48	175	909.4	915.9	912.65	4.5	2.1	29.8	0.477	30	129	20	2	3.24009	85.8151	0.413277	25.13	2.6491
7	10.48	175	909.4	915.9	912.65	4.5	2.1	29.8	0.477	30	129	20	2	3.24009	85.8151	0.413277	25.13	1.82668
8	10.48	175	909.4	915.9	912.65	4.5	2.1	29.8	0.477	30	129	20	2	3.24009	85.8151	0.413277	25.13	1.09105
9	10.48	175	909.4	915.9	912.65	4.5	2.1	29.8	0.477	30	129	20	2	3.24009	85.8151	0.413277	25.13	0.995997
10	10.48	175	909.4	915.9	912.65	4.5	2.1	29.8	0.477	30	129	20	2	3.24009	85.8151	0.413277	25.13	1.16957
11	10.48	175	909.4	915.9	912.65	4.5	2.1	29.8	0.477	30	129	20	2	3.24009	85.8151	0.413277	25.13	0.0826553
1	8.96	125	1120.2	1125.4	1122.8	4	3.3	29.5	0.423	33	107.52	17	2	1.63814	92.5369	0.611245	25	0.385084
2	8.96	125	1120.2	1125.4	1122.8	4	3.3	29.5	0.423	33	107.52	17	2	1.63814	92.5369	0.611245	25	0.794618
3	8.96	125	1120.2	1125.4	1122.8	4	3.3	29.5	0.423	33	107.52	17	2	1.63814	92.5369	0.611245	25	0.586795
4	8.96	125	1120.2	1125.4	1122.8	4	3.3	29.5	0.423	33	107.52	17	2	1.63814	92.5369	0.611245	25	0.238386
5	8.96	125	1120.2	1125.4	1122.8	4	3.3	29.5	0.423	33	107.52	17	2	1.63814	92.5369	0.611245	25	0.317847
6	8.96	125	1120.2	1125.4	1122.8	4	3.3	29.5	0.423	33	107.52	17	2	1.63814	92.5369	0.611245	25	0.0183373
1	8.96	125	1136.1	1147.4	1141.75	9.4	5.3	26.4	0.158	35	176.64	29	2	0.982718	92.5369	0.366686	25.2	0.231012
2	8.96	125	1136.1	1147.4	1141.75	9.4	5.3	26.4	0.158	35	176.64	29	2	0.982718	92.5369	0.366686	25.2	0.476691
3	8.96	125	1136.1	1147.4	1141.75	9.4	5.3	26.4	0.158	35	176.64	29	2	0.982718	92.5369	0.366686	25.2	0.352018
4	8.96	125	1136.1	1147.4	1141.75	9.4	5.3	26.4	0.158	35	176.64	29	2	0.982718	92.5369	0.366686	25.2	0.143007
5	8.96	125	1136.1	1147.4	1141.75	9.4	5.3	26.4	0.158	35	176.64	29	2	0.982718	92.5369	0.366686	25.2	0.190677
6	8.96	125	1136.1	1147.4	1141.75	9.4	5.3	26.4	0.158	35	176.64	29	2	0.982718	92.5369	0.366686	25.2	0.0110006
1	8.96	125	1155.2	1171.3	1163.25	5.9	0.8	25.2	0.063	43	224.88	37	2	0.0591461	92.5369	0.0220694	24.79	0.0139038
2	8.96	125	1155.2	1171.3	1163.25	5.9	0.8	25.2	0.063	43	224.88	37	2	0.0591461	92.5369	0.0220694	24.79	0.0286903
3	8.96	125	1155.2	1171.3	1163.25	5.9	0.8	25.2	0.063	43	224.88	37	2	0.0591461	92.5369	0.0220694	24.79	0.0211867
4	8.96	125	1155.2	1171.3	1163.25	5.9	0.8	25.2	0.063	43	224.88	37	2	0.0591461	92.5369	0.0220694	24.79	0.00860708
5	8.96	125	1155.2	1171.3	1163.25	5.9	0.8	25.2	0.063	43	224.88	37	2	0.0591461	92.5369	0.0220694	24.79	0.0114761
6	8.96	125	1155.2	1171.3	1163.25	5.9	0.8	25.2	0.063	43	224.88	37	2	0.0591461	92.5369	0.0220694	24.79	0.000662083
1	9.45	125	957.7	964.4	961.05	4.2	1.5	29.4	0.541	28	224.78	37	2	0.233906	92.7579	0.0801046	25.03	0.225895
2	9.45	125	957.7	964.4	961.05	4.2	1.5	29.4	0.541	28	224.78	37	2	0.233906	92.7579	0.0801046	25.03	1.04697
3	9.45	125	957.7	964.4	961.05	4.2	1.5	29.4	0.541	28	224.78	37	2	0.233906	92.7579	0.0801046	25.03	0.508664
4	9.45	125	957.7	964.4	961.05	4.2	1.5	29.4	0.541	28	224.78	37	2	0.233906	92.7579	0.0801046	25.03	0.0200262
1	9.45	125	978	985	981.5	6.2	2.8	31.3	0.768	28	178.5	29	2	0.619828	92.7579	0.21227	24.95	0.598601
2	9.45	125	978	985	981.5	6.2	2.8	31.3	0.768	28	178.5	29	2	0.619828	92.7579	0.21227	24.95	2.77437
3	9.45	125	978	985	981.5	6.2	2.8	31.3	0.768	28	178.5	29	2	0.619828	92.7579	0.21227	24.95	1.34791
4	9.45	125	978	985	981.5	6.2	2.8	31.3	0.768	28	178.5	29	2	0.619828	92.7579	0.21227	24.95	0.0530675
1	10.48	175	880.7	887	883.85	5.7	4.7	31.4	1.107	31	223.18	37	2	2.679	90.8124	0.47	24.8	1.7296
2	10.48	175	880.7	887	883.85	5.7	4.7	31.4	1.107	31	223.18	37	2	2.679	90.8124	0.47	24.8	1.3536
3	10.48	175	880.7	887	883.85	5.7	4.7	31.4	1.107	31	223.18	37	2	2.679	90.8124	0.47	24.8	2.0962
4	10.48	175	880.7	887	883.85	5.7	4.7	31.4	1.107	31	223.18	37	2	2.679	90.8124	0.47	24.8	1.9364
5	10.48	175	880.7	887	883.85	5.7	4.7	31.4	1.107	31	223.18	37	2	2.679	90.8124	0.47	24.8	0.9259
1	8.98	175	917	924.8	920.9	5.8	4	31.6	0.893	25	222.34	37	2	2.88296	93.5997	0.895328	24.99	6.12404
2	8.98	175	917	924.8	920.9	5.8	4	31.6	0.893	25	222.34	37	2	2.88296	93.5997	0.895328	24.99	5.28243
3	8.98	175	917	924.8	920.9	5.8	4	31.6	0.893	25	222.34	37	2	2.88296	93.5997	0.895328	24.99	6.47322
4	8.98	175	917	924.8	920.9	5.8	4	31.6	0.893	25	222.34	37	2	2.88296	93.5997	0.895328	24.99	5.53313
5	8.98	175	917	924.8	920.9	5.8	4	31.6	0.893	25	222.34	37	2	2.88296	93.5997	0.895328	24.99	4.9243
6	8.98	175	917	924.8	920.9	5.8	4	31.6	0.893	25	222.34	37	2	2.88296	93.5997	0.895328	24.99	4.32443
7	8.98	175	917	924.8	920.9	5.8	4	31.6	0.893	25	222.34	37	2	2.88296	93.5997	0.895328	24.99	4.70942
8	8.98	175	917	924.8	920.9	5.8	4	31.6	0.893	25	222.34	37	2	2.88296	93.5997	0.895328	24.99	2.65017
9	8.98	175	917	924.8	920.9	5.8	4	31.6	0.893	25	222.34	37	2	2.88296	93.5997	0.895328	24.99	5.34511
10	8.98	175	917	924.8	920.9	5.8	4	31.6	0.893	25	222.34	37	2	2.88296	93.5997	0.895328	24.99	4.53036
11	8.98	175	917	924.8	920.9	5.8	4	31.6	0.893	25	222.34	37	2	2.88296	93.5997	0.895328	24.99	2.7397
12	8.98	175	917	924.8	920.9	5.8	4	31.6	0.893	25	222.34	37	2	2.88296	93.5997	0.895328	24.99	2.61436
1	9.73	175	979.9	985.3	982.6	4.6	2.6	30.3	0.552	32	223.18	37	2	0.986327	92.7965	0.314117	25.13	1.38526
2	9.73	175	979.9	985.3	982.6	4.6	2.6	30.3	0.552	32	223.18	37	2	0.986327	92.7965	0.314117	25.13	0.631375
3	9.73	175	979.9	985.3	982.6	4.6	2.6	30.3	0.552	32	223.18	37	2	0.986327	92.7965	0.314117	25.13	0.358093
4	9.73	175	979.9	985.3	982.6	4.6	2.6	30.3	0.552	32	223.18	37	2	0.986327	92.7965	0.314117	25.13	0.417775
5	9.73	175	979.9	985.3	982.6	4.6	2.6	30.3	0.552	32	223.18	37	2	0.986327	92.7965	0.314117	25.13	0.0816704
1	9.73	175	990.9	996.6	993.75	4.8	3.4	30.9	0.855	29	153.18	25	2	1.99781	92.7965	0.636244	25.13	2.80584
2	9.73	175	990.9	996.6	993.75	4.8	3.4	30.9	0.855	29	153.18	25	2	1.99781	92.7965	0.636244	25.13	1.27885
3	9.73	175	990.9	996.6	993.75	4.8	3.4	30.9	0.855	29	153.18	25	2	1.99781	92.7965	0.636244	25.13	0.725318
4	9.73	175	990.9	996.6	993.75	4.8	3.4	30.9	0.855	29	153.18	25	2	1.99781	92.7965	0.636244	25.13	0.846205
5	9.73	175	990.9	996.6	993.75	4.8	3.4	30.9	0.855	29	153.18	25	2	1.99781	92.7965	0.636244	25.13	0.165424
1	11.26	125	1139.8	1155.6	1147.7	13.8	11.1	31.1	0.971	25	142.26	23	2	1.37459	94.5828	0.789992	25.21	2.94667
2	11.26	125	1139.8	1155.6	1147.7	13.8	11.1	31.1	0.971	25	142.26	23	2	1.37459	94.5828	0.789992	25.21	4.78735
3	11.26	125	1139.8	1155.6	1147.7	13.8	11.1	31.1	0.971	25	142.26	23	2	1.37459	94.5828	0.789992	25.21	3.42857
4	11.26	125	1139.8	1155.6	1147.7	13.8	11.1	31.1	0.971	25	142.26	23	2	1.37459	94.5828	0.789992	25.21	3.27847
5	11.26	125	1139.8	1155.6	1147.7	13.8	11.1	31.1	0.971	25	142.26	23	2	1.37459	94.5828	0.789992	25.21	3.08887
6	11.26	125	1139.8	1155.6	1147.7	13.8	11.1	31.1	0.971	25	142.26	23	2	1.37459	94.5828	0.789992	25.21	1.91968
7	11.26	125	1139.8	1155.6	1147.7	13.8	11.1	31.1	0.971	25	142.26	23	2	1.37459	94.5828	0.789992	25.21	0.789992
8	11.26	125	1139.8	1155.6	1147.7	13.8	11.1	31.1	0.971	25	142.26	23	2	1.37459	94.5828	0.789992	25.21	1.31139
9	11.26	125	1139.8	1155.6	1147.7	13.8	11.1	31.1	0.971	25	142.26	23	2	1.37459	94.5828	0.789992	25.21	1.22449
10	11.26	125	1139.8	1155.6	1147.7	13.8	11.1	31.1	0.971	25	142.26	23	2	1.37459	94.5828	0.789992	25.21	0.955891
11	11.26	125	1139.8	1155.6	1147.7	13.8	11.1	31.1	0.971	25	142.26	23	2	1.37459	94.5828	0.789992	25.21	0.600394
12	11.26	125	1139.8	1155.6	1147.7	13.8	11.1	31.1	0.971	25	142.26	23	2	1.37459	94.5828	0.789992	25.21	1.17709
1	9.66	150	1001.5	1017.2	1009.35	10.2	7.5	30.1	0.888	24	178.98	29	2	0	0	0.737411	25	8.43598
2	9.66	150	1001.5	1017.2	1009.35	10.2	7.5	30.1	0.888	24	178.98	29	2	0	0	0.737411	25	10.3164
3	9.66	150	1001.5	1017.2	1009.35	10.2	7.5	30.1	0.888	24	178.98	29	2	0	0	0.737411	25	9.36512
4	9.66	150	1001.5	1017.2	1009.35	10.2	7.5	30.1	0.888	24	178.98	29	2	0	0	0.737411	25	6.90954
5	9.66	150	1001.5	1017.2	1009.35	10.2	7.5	30.1	0.888	24	178.98	29	2	0	0	0.737411	25	6.38598
6	9.66	150	1001.5	1017.2	1009.35	10.2	7.5	30.1	0.888	24	178.98	29	2	0	0	0.737411	25	5.04389
7	9.66	150	1001.5	1017.2	1009.35	10.2	7.5	30.1	0.888	24	178.98	29	2	0	0	0.737411	25	4.62357
8	9.66	150	1001.5	1017.2	1009.35	10.2	7.5	30.1	0.888	24	178.98	29	2	0	0	0.737411	25	5.16188
9	9.66	150	1001.5	1017.2	1009.35	10.2	7.5	30.1	0.888	24	178.98	29	2	0	0	0.737411	25	6.96853
10	9.66	150	1001.5	1017.2	1009.35	10.2	7.5	30.1	0.888	24	178.98	29	2	0	0	0.737411	25	6.49659
11	9.66	150	1001.5	1017.2	1009.35	10.2	7.5	30.1	0.888	24	178.98	29	2	0	0	0.737411	25	5.27249
12	9.66	150	1001.5	1017.2	1009.35	10.2	7.5	30.1	0.888	24	178.98	29	2	0	0	0.737411	25	6.37123
1	9.66	150	1020.7	1030	1025.35	6.6	4.4	28.6	0.539	24	178.28	29	2	0	0	0.262589	25	3.00402
2	9.66	150	1020.7	1030	1025.35	6.6	4.4	28.6	0.539	24	178.28	29	2	0	0	0.262589	25	3.67362
3	9.66	150	1020.7	1030	1025.35	6.6	4.4	28.6	0.539	24	178.28	29	2	0	0	0.262589	25	3.33488
4	9.66	150	1020.7	1030	1025.35	6.6	4.4	28.6	0.539	24	178.28	29	2	0	0	0.262589	25	2.46046
5	9.66	150	1020.7	1030	1025.35	6.6	4.4	28.6	0.539	24	178.28	29	2	0	0	0.262589	25	2.27402
6	9.66	150	1020.7	1030	1025.35	6.6	4.4	28.6	0.539	24	178.28	29	2	0	0	0.262589	25	1.79611
7	9.66	150	1020.7	1030	1025.35	6.6	4.4	28.6	0.539	24	178.28	29	2	0	0	0.262589	25	1.64643
8	9.66	150	1020.7	1030	1025.35	6.6	4.4	28.6	0.539	24	178.28	29	2	0	0	0.262589	25	1.83812
9	9.66	150	1020.7	1030	1025.35	6.6	4.4	28.6	0.539	24	178.28	29	2	0	0	0.262589	25	2.48147
10	9.66	150	1020.7	1030	1025.35	6.6	4.4	28.6	0.539	24	178.28	29	2	0	0	0.262589	25	2.31341
11	9.66	150	1020.7	1030	1025.35	6.6	4.4	28.6	0.539	24	178.28	29	2	0	0	0.262589	25	1.87751
12	9.66	150	1020.7	1030	1025.35	6.6	4.4	28.6	0.539	24	178.28	29	2	0	0	0.262589	25	2.26877
1	9.27	125	945	948.9	946.95	2.9	1	29.3	0.42	26	259.7	43	2	0.293911	94.937	0.11261	25	0.533769
2	9.27	125	945	948.9	946.95	2.9	1	29.3	0.42	26	259.7	43	2	0.293911	94.937	0.11261	25	0.445934
3	9.27	125	945	948.9	946.95	2.9	1	29.3	0.42	26	259.7	43	2	0.293911	94.937	0.11261	25	0.244363
4	9.27	125	945	948.9	946.95	2.9	1	29.3	0.42	26	259.7	43	2	0.293911	94.937	0.11261	25	0.15878
5	9.27	125	945	948.9	946.95	2.9	1	29.3	0.42	26	259.7	43	2	0.293911	94.937	0.11261	25	0.0506743
6	9.27	125	945	948.9	946.95	2.9	1	29.3	0.42	26	259.7	43	2	0.293911	94.937	0.11261	25	0.105853
7	9.27	125	945	948.9	946.95	2.9	1	29.3	0.42	26	259.7	43	2	0.293911	94.937	0.11261	25	0.0202697
8	9.27	125	945	948.9	946.95	2.9	1	29.3	0.42	26	259.7	43	2	0.293911	94.937	0.11261	25	0.0135132
1	7.37	175	910	919.8	914.9	8.4	6	29.9	0.34	27	189.14	29	2	0.954894	93.7429	0.434043	24.88	0.499149
2	7.37	175	910	919.8	914.9	8.4	6	29.9	0.34	27	189.14	29	2	0.954894	93.7429	0.434043	24.88	1.0634
3	7.37	175	910	919.8	914.9	8.4	6	29.9	0.34	27	189.14	29	2	0.954894	93.7429	0.434043	24.88	1.86204
4	7.37	175	910	919.8	914.9	8.4	6	29.9	0.34	27	189.14	29	2	0.954894	93.7429	0.434043	24.88	6.51064
5	7.37	175	910	919.8	914.9	8.4	6	29.9	0.34	27	189.14	29	2	0.954894	93.7429	0.434043	24.88	3.65898
6	7.37	175	910	919.8	914.9	8.4	6	29.9	0.34	27	189.14	29	2	0.954894	93.7429	0.434043	24.88	2.93847
7	7.37	175	910	919.8	914.9	8.4	6	29.9	0.34	27	189.14	29	2	0.954894	93.7429	0.434043	24.88	3.49404
8	7.37	175	910	919.8	914.9	8.4	6	29.9	0.34	27	189.14	29	2	0.954894	93.7429	0.434043	24.88	3.3074
9	7.37	175	910	919.8	914.9	8.4	6	29.9	0.34	27	189.14	29	2	0.954894	93.7429	0.434043	24.88	2.4697
10	7.37	175	910	919.8	914.9	8.4	6	29.9	0.34	27	189.14	29	2	0.954894	93.7429	0.434043	24.88	2.82562
11	7.37	175	910	919.8	914.9	8.4	6	29.9	0.34	27	189.14	29	2	0.954894	93.7429	0.434043	24.88	3.60255
1	9.65	175	982.2	989.5	985.85	6.4	4.6	32.3	1.037	26	276.12	29	2	0.428589	97.3945	0.510225	25.77	0.0816361
2	9.65	175	982.2	989.5	985.85	6.4	4.6	32.3	1.037	26	276.12	29	2	0.428589	97.3945	0.510225	25.77	2.45418
3	9.65	175	982.2	989.5	985.85	6.4	4.6	32.3	1.037	26	276.12	29	2	0.428589	97.3945	0.510225	25.77	1.43373
4	9.65	175	982.2	989.5	985.85	6.4	4.6	32.3	1.037	26	276.12	29	2	0.428589	97.3945	0.510225	25.77	1.31638
5	9.65	175	982.2	989.5	985.85	6.4	4.6	32.3	1.037	26	276.12	29	2	0.428589	97.3945	0.510225	25.77	1.28577
6	9.65	175	982.2	989.5	985.85	6.4	4.6	32.3	1.037	26	276.12	29	2	0.428589	97.3945	0.510225	25.77	1.05617
7	9.65	175	982.2	989.5	985.85	6.4	4.6	32.3	1.037	26	276.12	29	2	0.428589	97.3945	0.510225	25.77	1.1327
8	9.65	175	982.2	989.5	985.85	6.4	4.6	32.3	1.037	26	276.12	29	2	0.428589	97.3945	0.510225	25.77	1.20413
9	9.65	175	982.2	989.5	985.85	6.4	4.6	32.3	1.037	26	276.12	29	2	0.428589	97.3945	0.510225	25.77	1.73987
10	9.65	175	982.2	989.5	985.85	6.4	4.6	32.3	1.037	26	276.12	29	2	0.428589	97.3945	0.510225	25.77	1.74497
11	9.65	175	982.2	989.5	985.85	6.4	4.6	32.3	1.037	26	276.12	29	2	0.428589	97.3945	0.510225	25.77	1.40312
12	9.65	175	982.2	989.5	985.85	6.4	4.6	32.3	1.037	26	276.12	29	2	0.428589	97.3945	0.510225	25.77	1.32659
1	9.65	175	993.3	999.8	996.55	5	3.8	32.3	1.205	25	268.44	37	2	0.411411	97.3945	0.489775	24.93	0.0783639
2	9.65	175	993.3	999.8	996.55	5	3.8	32.3	1.205	25	268.44	37	2	0.411411	97.3945	0.489775	24.93	2.35582
3	9.65	175	993.3	999.8	996.55	5	3.8	32.3	1.205	25	268.44	37	2	0.411411	97.3945	0.489775	24.93	1.37627
4	9.65	175	993.3	999.8	996.55	5	3.8	32.3	1.205	25	268.44	37	2	0.411411	97.3945	0.489775	24.93	1.26362
5	9.65	175	993.3	999.8	996.55	5	3.8	32.3	1.205	25	268.44	37	2	0.411411	97.3945	0.489775	24.93	1.23423
6	9.65	175	993.3	999.8	996.55	5	3.8	32.3	1.205	25	268.44	37	2	0.411411	97.3945	0.489775	24.93	1.01383
7	9.65	175	993.3	999.8	996.55	5	3.8	32.3	1.205	25	268.44	37	2	0.411411	97.3945	0.489775	24.93	1.0873
8	9.65	175	993.3	999.8	996.55	5	3.8	32.3	1.205	25	268.44	37	2	0.411411	97.3945	0.489775	24.93	1.15587
9	9.65	175	993.3	999.8	996.55	5	3.8	32.3	1.205	25	268.44	37	2	0.411411	97.3945	0.489775	24.93	1.67013
10	9.65	175	993.3	999.8	996.55	5	3.8	32.3	1.205	25	268.44	37	2	0.411411	97.3945	0.489775	24.93	1.67503
11	9.65	175	993.3	999.8	996.55	5	3.8	32.3	1.205	25	268.44	37	2	0.411411	97.3945	0.489775	24.93	1.34688
12	9.65	175	993.3	999.8	996.55	5	3.8	32.3	1.205	25	268.44	37	2	0.411411	97.3945	0.489775	24.93	1.27341
1	7.37	175	896.8	905.8	901.3	6.6	4.4	30.6	1.01	41	176.44	29	2	3.7148	90.9623	0.687926	25	2.90993
2	7.37	175	896.8	905.8	901.3	6.6	4.4	30.6	1.01	41	176.44	29	2	3.7148	90.9623	0.687926	25	2.73107
3	7.37	175	896.8	905.8	901.3	6.6	4.4	30.6	1.01	41	176.44	29	2	3.7148	90.9623	0.687926	25	4.59534
4	7.37	175	896.8	905.8	901.3	6.6	4.4	30.6	1.01	41	176.44	29	2	3.7148	90.9623	0.687926	25	2.4215
5	7.37	175	896.8	905.8	901.3	6.6	4.4	30.6	1.01	41	176.44	29	2	3.7148	90.9623	0.687926	25	1.35521
6	7.37	175	896.8	905.8	901.3	6.6	4.4	30.6	1.01	41	176.44	29	2	3.7148	90.9623	0.687926	25	1.01125
7	7.37	175	896.8	905.8	901.3	6.6	4.4	30.6	1.01	41	176.44	29	2	3.7148	90.9623	0.687926	25	1.85052
1	9.73	175	978.3	988.9	983.6	7.4	4.4	31.9	1.059	24	390.76	37	2	3.67919	86.9792	0.668945	25.13	1.48506
2	9.73	175	978.3	988.9	983.6	7.4	4.4	31.9	1.059	24	390.76	37	2	3.67919	86.9792	0.668945	25.13	1.65229
3	9.73	175	978.3	988.9	983.6	7.4	4.4	31.9	1.059	24	390.76	37	2	3.67919	86.9792	0.668945	25.13	0.147168
1	9.73	175	990.6	996.2	993.4	4	2	32.3	1.153	55	274.4	56.5	2	1.82081	86.9792	0.331055	24.86	0.734943
2	9.73	175	990.6	996.2	993.4	4	2	32.3	1.153	55	274.4	56.5	2	1.82081	86.9792	0.331055	24.86	0.817707
3	9.73	175	990.6	996.2	993.4	4	2	32.3	1.153	55	274.4	56.5	2	1.82081	86.9792	0.331055	24.86	0.0728322
1	11.93	125	1106.3	1111.6	1108.95	4.6	1.5	26.9	0.215	34	200.5	33	2	0.091402	96.4358	0.0648241	25.13	0.0985327
2	11.93	125	1106.3	1111.6	1108.95	4.6	1.5	26.9	0.215	34	200.5	33	2	0.091402	96.4358	0.0648241	25.13	0.0998291
3	11.93	125	1106.3	1111.6	1108.95	4.6	1.5	26.9	0.215	34	200.5	33	2	0.091402	96.4358	0.0648241	25.13	0.0440804
4	11.93	125	1106.3	1111.6	1108.95	4.6	1.5	26.9	0.215	34	200.5	33	2	0.091402	96.4358	0.0648241	25.13	0.0155578
5	11.93	125	1106.3	1111.6	1108.95	4.6	1.5	26.9	0.215	34	200.5	33	2	0.091402	96.4358	0.0648241	25.13	0.0311156
1	8.83	175	940.4	944	942.2	3	1.6	29.3	0.21	32	276.14	45	2	0.307917	87.976	0.0902983	24.89	0.139059
2	8.83	175	940.4	944	942.2	3	1.6	29.3	0.21	32	276.14	45	2	0.307917	87.976	0.0902983	24.89	0.0334104
3	8.83	175	940.4	944	942.2	3	1.6	29.3	0.21	32	276.14	45	2	0.307917	87.976	0.0902983	24.89	0.76573
4	8.83	175	940.4	944	942.2	3	1.6	29.3	0.21	32	276.14	45	2	0.307917	87.976	0.0902983	24.89	0.774759
5	8.83	175	940.4	944	942.2	3	1.6	29.3	0.21	32	276.14	45	2	0.307917	87.976	0.0902983	24.89	0.989669
6	8.83	175	940.4	944	942.2	3	1.6	29.3	0.21	32	276.14	45	2	0.307917	87.976	0.0902983	24.89	0.561655
7	8.83	175	940.4	944	942.2	3	1.6	29.3	0.21	32	276.14	45	2	0.307917	87.976	0.0902983	24.89	0.707036
8	8.83	175	940.4	944	942.2	3	1.6	29.3	0.21	32	276.14	45	2	0.307917	87.976	0.0902983	24.89	0.652857
9	8.83	175	940.4	944	942.2	3	1.6	29.3	0.21	32	276.14	45	2	0.307917	87.976	0.0902983	24.89	0.511991
10	8.83	175	940.4	944	942.2	3	1.6	29.3	0.21	32	276.14	45	2	0.307917	87.976	0.0902983	24.89	0.862349
11	8.83	175	940.4	944	942.2	3	1.6	29.3	0.21	32	276.14	45	2	0.307917	87.976	0.0902983	24.89	0.730513
12	8.83	175	940.4	944	942.2	3	1.6	29.3	0.21	32	276.14	45	2	0.307917	87.976	0.0902983	24.89	0.503865
1	8.83	175	945.6	954.9	950.25	6.6	5.5	30.1	0.22	21	166.74	27	2	1.10887	87.976	0.325181	25.06	0.500779
2	8.83	175	945.6	954.9	950.25	6.6	5.5	30.1	0.22	21	166.74	27	2	1.10887	87.976	0.325181	25.06	0.120317
3	8.83	175	945.6	954.9	950.25	6.6	5.5	30.1	0.22	21	166.74	27	2	1.10887	87.976	0.325181	25.06	2.75754
4	8.83	175	945.6	954.9	950.25	6.6	5.5	30.1	0.22	21	166.74	27	2	1.10887	87.976	0.325181	25.06	2.79006
5	8.83	175	945.6	954.9	950.25	6.6	5.5	30.1	0.22	21	166.74	27	2	1.10887	87.976	0.325181	25.06	3.56399
6	8.83	175	945.6	954.9	950.25	6.6	5.5	30.1	0.22	21	166.74	27	2	1.10887	87.976	0.325181	25.06	2.02263
7	8.83	175	945.6	954.9	950.25	6.6	5.5	30.1	0.22	21	166.74	27	2	1.10887	87.976	0.325181	25.06	2.54617
8	8.83	175	945.6	954.9	950.25	6.6	5.5	30.1	0.22	21	166.74	27	2	1.10887	87.976	0.325181	25.06	2.35106
9	8.83	175	945.6	954.9	950.25	6.6	5.5	30.1	0.22	21	166.74	27	2	1.10887	87.976	0.325181	25.06	1.84378
10	8.83	175	945.6	954.9	950.25	6.6	5.5	30.1	0.22	21	166.74	27	2	1.10887	87.976	0.325181	25.06	3.10548
11	8.83	175	945.6	954.9	950.25	6.6	5.5	30.1	0.22	21	166.74	27	2	1.10887	87.976	0.325181	25.06	2.63072
12	8.83	175	945.6	954.9	950.25	6.6	5.5	30.1	0.22	21	166.74	27	2	1.10887	87.976	0.325181	25.06	1.81451
1	10.23	125	1135.1	1142.7	1138.9	5.9	2.4	29.5	0.493	28	142.78	23	2	0.402109	88.0939	0.188783	25.13	0.615434
2	10.23	125	1135.1	1142.7	1138.9	5.9	2.4	29.5	0.493	28	142.78	23	2	0.402109	88.0939	0.188783	25.13	0.315268
3	10.23	125	1135.1	1142.7	1138.9	5.9	2.4	29.5	0.493	28	142.78	23	2	0.402109	88.0939	0.188783	25.13	0.124597
4	10.23	125	1135.1	1142.7	1138.9	5.9	2.4	29.5	0.493	28	142.78	23	2	0.402109	88.0939	0.188783	25.13	0.343586
5	10.23	125	1135.1	1142.7	1138.9	5.9	2.4	29.5	0.493	28	142.78	23	2	0.402109	88.0939	0.188783	25.13	0.0736255
1	10.23	125	1148	1152.4	1150.2	2.6	0.7	26.2	0.079	53	142.96	23	2	0.0187936	88.0939	0.00882329	25.09	0.0287639
2	10.23	125	1148	1152.4	1150.2	2.6	0.7	26.2	0.079	53	142.96	23	2	0.0187936	88.0939	0.00882329	25.09	0.0147349
3	10.23	125	1148	1152.4	1150.2	2.6	0.7	26.2	0.079	53	142.96	23	2	0.0187936	88.0939	0.00882329	25.09	0.00582337
4	10.23	125	1148	1152.4	1150.2	2.6	0.7	26.2	0.079	53	142.96	23	2	0.0187936	88.0939	0.00882329	25.09	0.0160584
5	10.23	125	1148	1152.4	1150.2	2.6	0.7	26.2	0.079	53	142.96	23	2	0.0187936	88.0939	0.00882329	25.09	0.00344108
1	10.23	125	1154.2	1164.6	1159.4	8.2	0.7	28.2	0.212	49	146.8	23	2	0.0504335	88.0939	0.0236777	25.09	0.0771893
2	10.23	125	1154.2	1164.6	1159.4	8.2	0.7	28.2	0.212	49	146.8	23	2	0.0504335	88.0939	0.0236777	25.09	0.0395418
3	10.23	125	1154.2	1164.6	1159.4	8.2	0.7	28.2	0.212	49	146.8	23	2	0.0504335	88.0939	0.0236777	25.09	0.0156273
4	10.23	125	1154.2	1164.6	1159.4	8.2	0.7	28.2	0.212	49	146.8	23	2	0.0504335	88.0939	0.0236777	25.09	0.0430934
5	10.23	125	1154.2	1164.6	1159.4	8.2	0.7	28.2	0.212	49	146.8	23	2	0.0504335	88.0939	0.0236777	25.09	0.0092343
1	10.59	125	1090.5	1098.9	1094.7	6.1	2.4	30.5	0.28	31	159.94	25	2	0.274211	85.4723	0.0968942	24.98	0.17441
2	10.59	125	1090.5	1098.9	1094.7	6.1	2.4	30.5	0.28	31	159.94	25	2	0.274211	85.4723	0.0968942	24.98	0.280993
3	10.59	125	1090.5	1098.9	1094.7	6.1	2.4	30.5	0.28	31	159.94	25	2	0.274211	85.4723	0.0968942	24.98	0.166658
4	10.59	125	1090.5	1098.9	1094.7	6.1	2.4	30.5	0.28	31	159.94	25	2	0.274211	85.4723	0.0968942	24.98	0.300372
5	10.59	125	1090.5	1098.9	1094.7	6.1	2.4	30.5	0.28	31	159.94	25	2	0.274211	85.4723	0.0968942	24.98	0.249987
6	10.59	125	1090.5	1098.9	1094.7	6.1	2.4	30.5	0.28	31	159.94	25	2	0.274211	85.4723	0.0968942	24.98	0.124025
7	10.59	125	1090.5	1098.9	1094.7	6.1	2.4	30.5	0.28	31	159.94	25	2	0.274211	85.4723	0.0968942	24.98	0.0658881
8	10.59	125	1090.5	1098.9	1094.7	6.1	2.4	30.5	0.28	31	159.94	25	2	0.274211	85.4723	0.0968942	24.98	0.0397266
9	10.59	125	1090.5	1098.9	1094.7	6.1	2.4	30.5	0.28	31	159.94	25	2	0.274211	85.4723	0.0968942	24.98	0.0532918
10	10.59	125	1090.5	1098.9	1094.7	6.1	2.4	30.5	0.28	31	159.94	25	2	0.274211	85.4723	0.0968942	24.98	0.0542607
11	10.59	125	1090.5	1098.9	1094.7	6.1	2.4	30.5	0.28	31	159.94	25	2	0.274211	85.4723	0.0968942	24.98	0.0184099
12	10.59	125	1090.5	1098.9	1094.7	6.1	2.4	30.5	0.28	31	159.94	25	2	0.274211	85.4723	0.0968942	24.98	0.0106584
1	9.49	125	1107.4	1119.2	1113.3	8	3	31.5	1.132	29	146.3	23	2	2.06414	87.4702	0.982923	25.05	5.35693
2	9.49	125	1107.4	1119.2	1113.3	8	3	31.5	1.132	29	146.3	23	2	2.06414	87.4702	0.982923	25.05	5.66164
3	9.49	125	1107.4	1119.2	1113.3	8	3	31.5	1.132	29	146.3	23	2	2.06414	87.4702	0.982923	25.05	4.67871
4	9.49	125	1107.4	1119.2	1113.3	8	3	31.5	1.132	29	146.3	23	2	2.06414	87.4702	0.982923	25.05	5.20949
5	9.49	125	1107.4	1119.2	1113.3	8	3	31.5	1.132	29	146.3	23	2	2.06414	87.4702	0.982923	25.05	2.99792
6	9.49	125	1107.4	1119.2	1113.3	8	3	31.5	1.132	29	146.3	23	2	2.06414	87.4702	0.982923	25.05	1.98551
7	9.49	125	1107.4	1119.2	1113.3	8	3	31.5	1.132	29	146.3	23	2	2.06414	87.4702	0.982923	25.05	1.77909
8	9.49	125	1107.4	1119.2	1113.3	8	3	31.5	1.132	29	146.3	23	2	2.06414	87.4702	0.982923	25.05	1.41541
9	9.49	125	1107.4	1119.2	1113.3	8	3	31.5	1.132	29	146.3	23	2	2.06414	87.4702	0.982923	25.05	0.452145
10	9.49	125	1107.4	1119.2	1113.3	8	3	31.5	1.132	29	146.3	23	2	2.06414	87.4702	0.982923	25.05	0.717534
11	9.49	125	1107.4	1119.2	1113.3	8	3	31.5	1.132	29	146.3	23	2	2.06414	87.4702	0.982923	25.05	0.25556
1	9.65	175	956.1	964	960.05	7.9	6.3	29.9	0.812	27	122.98	19	2	0.757026	96.4833	0.610504	25	2.44812
2	9.65	175	956.1	964	960.05	7.9	6.3	29.9	0.812	27	122.98	19	2	0.757026	96.4833	0.610504	25	1.91088
3	9.65	175	956.1	964	960.05	7.9	6.3	29.9	0.812	27	122.98	19	2	0.757026	96.4833	0.610504	25	1.41637
4	9.65	175	956.1	964	960.05	7.9	6.3	29.9	0.812	27	122.98	19	2	0.757026	96.4833	0.610504	25	0.543349
5	9.65	175	956.1	964	960.05	7.9	6.3	29.9	0.812	27	122.98	19	2	0.757026	96.4833	0.610504	25	0.482299
6	9.65	175	956.1	964	960.05	7.9	6.3	29.9	0.812	27	122.98	19	2	0.757026	96.4833	0.610504	25	0.189256
7	9.65	175	956.1	964	960.05	7.9	6.3	29.9	0.812	27	122.98	19	2	0.757026	96.4833	0.610504	25	0.201466
8	9.65	175	956.1	964	960.05	7.9	6.3	29.9	0.812	27	122.98	19	2	0.757026	96.4833	0.610504	25	0.207572
1	9.73	175	972.5	975.4	973.95	2.2	0.8	29.5	0.512	26	223.56	37	2	0.204778	95.5837	0.108925	25.08	0.956358
2	9.73	175	972.5	975.4	973.95	2.2	0.8	29.5	0.512	26	223.56	37	2	0.204778	95.5837	0.108925	25.08	1.30165
3	9.73	175	972.5	975.4	973.95	2.2	0.8	29.5	0.512	26	223.56	37	2	0.204778	95.5837	0.108925	25.08	0.868129
4	9.73	175	972.5	975.4	973.95	2.2	0.8	29.5	0.512	26	223.56	37	2	0.204778	95.5837	0.108925	25.08	0.506499
5	9.73	175	972.5	975.4	973.95	2.2	0.8	29.5	0.512	26	223.56	37	2	0.204778	95.5837	0.108925	25.08	0.489071
6	9.73	175	972.5	975.4	973.95	2.2	0.8	29.5	0.512	26	223.56	37	2	0.204778	95.5837	0.108925	25.08	0.601264
7	9.73	175	972.5	975.4	973.95	2.2	0.8	29.5	0.512	26	223.56	37	2	0.204778	95.5837	0.108925	25.08	0.544623
8	9.73	175	972.5	975.4	973.95	2.2	0.8	29.5	0.512	26	223.56	37	2	0.204778	95.5837	0.108925	25.08	0.515213
9	9.73	175	972.5	975.4	973.95	2.2	0.8	29.5	0.512	26	223.56	37	2	0.204778	95.5837	0.108925	25.08	0.368165
10	9.73	175	972.5	975.4	973.95	2.2	0.8	29.5	0.512	26	223.56	37	2	0.204778	95.5837	0.108925	25.08	0.401932
11	9.73	175	972.5	975.4	973.95	2.2	0.8	29.5	0.512	26	223.56	37	2	0.204778	95.5837	0.108925	25.08	0.448769
1	8.01	125	894.6	899.4	897	2.9	0.4	27.7	0.15	53	176.28	29	2	0.389414	75.2503	0.063012	25.13	0.221172
2	8.01	125	894.6	899.4	897	2.9	0.4	27.7	0.15	53	176.28	29	2	0.389414	75.2503	0.063012	25.13	0.303088
3	8.01	125	894.6	899.4	897	2.9	0.4	27.7	0.15	53	176.28	29	2	0.389414	75.2503	0.063012	25.13	0.195337
4	8.01	125	894.6	899.4	897	2.9	0.4	27.7	0.15	53	176.28	29	2	0.389414	75.2503	0.063012	25.13	0.145558
5	8.01	125	894.6	899.4	897	2.9	0.4	27.7	0.15	53	176.28	29	2	0.389414	75.2503	0.063012	25.13	0.125394
1	7.95	125	824.7	831	827.85	5	4.2	31.3	0.633	28	178.56	29	2	1.95994	91.7235	0.576453	24.88	1.85041
2	7.95	125	824.7	831	827.85	5	4.2	31.3	0.633	28	178.56	29	2	1.95994	91.7235	0.576453	24.88	1.50454
3	7.95	125	824.7	831	827.85	5	4.2	31.3	0.633	28	178.56	29	2	1.95994	91.7235	0.576453	24.88	1.87924
4	7.95	125	824.7	831	827.85	5	4.2	31.3	0.633	28	178.56	29	2	1.95994	91.7235	0.576453	24.88	1.69477
5	7.95	125	824.7	831	827.85	5	4.2	31.3	0.633	28	178.56	29	2	1.95994	91.7235	0.576453	24.88	1.87924
6	7.95	125	824.7	831	827.85	5	4.2	31.3	0.633	28	178.56	29	2	1.95994	91.7235	0.576453	24.88	1.787
7	7.95	125	824.7	831	827.85	5	4.2	31.3	0.633	28	178.56	29	2	1.95994	91.7235	0.576453	24.88	1.10679
8	7.95	125	824.7	831	827.85	5	4.2	31.3	0.633	28	178.56	29	2	1.95994	91.7235	0.576453	24.88	0.933853
9	7.95	125	824.7	831	827.85	5	4.2	31.3	0.633	28	178.56	29	2	1.95994	91.7235	0.576453	24.88	0.956912
10	7.95	125	824.7	831	827.85	5	4.2	31.3	0.633	28	178.56	29	2	1.95994	91.7235	0.576453	24.88	0.374694
1	7.95	125	835.9	843.1	839.5	6.1	3.3	30.4	0.584	30	178.56	29	2	1.42075	91.7235	0.417866	24.88	1.34135
2	7.95	125	835.9	843.1	839.5	6.1	3.3	30.4	0.584	30	178.56	29	2	1.42075	91.7235	0.417866	24.88	1.09063
3	7.95	125	835.9	843.1	839.5	6.1	3.3	30.4	0.584	30	178.56	29	2	1.42075	91.7235	0.417866	24.88	1.36224
4	7.95	125	835.9	843.1	839.5	6.1	3.3	30.4	0.584	30	178.56	29	2	1.42075	91.7235	0.417866	24.88	1.22853
5	7.95	125	835.9	843.1	839.5	6.1	3.3	30.4	0.584	30	178.56	29	2	1.42075	91.7235	0.417866	24.88	1.36224
6	7.95	125	835.9	843.1	839.5	6.1	3.3	30.4	0.584	30	178.56	29	2	1.42075	91.7235	0.417866	24.88	1.29539
7	7.95	125	835.9	843.1	839.5	6.1	3.3	30.4	0.584	30	178.56	29	2	1.42075	91.7235	0.417866	24.88	0.802304
8	7.95	125	835.9	843.1	839.5	6.1	3.3	30.4	0.584	30	178.56	29	2	1.42075	91.7235	0.417866	24.88	0.676944
9	7.95	125	835.9	843.1	839.5	6.1	3.3	30.4	0.584	30	178.56	29	2	1.42075	91.7235	0.417866	24.88	0.693658
10	7.95	125	835.9	843.1	839.5	6.1	3.3	30.4	0.584	30	178.56	29	2	1.42075	91.7235	0.417866	24.88	0.271613
1	9.66	175	1024.5	1030.6	1027.55	4.6	2.6	30.8	0.505	31	225.88	37	2	0	0	0.366678	25.03	1.22104
2	9.66	175	1024.5	1030.6	1027.55	4.6	2.6	30.8	0.505	31	225.88	37	2	0	0	0.366678	25.03	1.37138
3	9.66	175	1024.5	1030.6	1027.55	4.6	2.6	30.8	0.505	31	225.88	37	2	0	0	0.366678	25.03	1.41538
4	9.66	175	1024.5	1030.6	1027.55	4.6	2.6	30.8	0.505	31	225.88	37	2	0	0	0.366678	25.03	1.23937
5	9.66	175	1024.5	1030.6	1027.55	4.6	2.6	30.8	0.505	31	225.88	37	2	0	0	0.366678	25.03	1.0047
6	9.66	175	1024.5	1030.6	1027.55	4.6	2.6	30.8	0.505	31	225.88	37	2	0	0	0.366678	25.03	1.50705
7	9.66	175	1024.5	1030.6	1027.55	4.6	2.6	30.8	0.505	31	225.88	37	2	0	0	0.366678	25.03	1.81139
8	9.66	175	1024.5	1030.6	1027.55	4.6	2.6	30.8	0.505	31	225.88	37	2	0	0	0.366678	25.03	1.70505
9	9.66	175	1024.5	1030.6	1027.55	4.6	2.6	30.8	0.505	31	225.88	37	2	0	0	0.366678	25.03	1.37138
10	9.66	175	1024.5	1030.6	1027.55	4.6	2.6	30.8	0.505	31	225.88	37	2	0	0	0.366678	25.03	1.41171
11	9.66	175	1024.5	1030.6	1027.55	4.6	2.6	30.8	0.505	31	225.88	37	2	0	0	0.366678	25.03	1.47038
12	9.66	175	1024.5	1030.6	1027.55	4.6	2.6	30.8	0.505	31	225.88	37	2	0	0	0.366678	25.03	1.70139
1	9.66	175	1035.8	1040.3	1038.05	2.8	1.3	30.4	0.505	33	226.48	37	2	0	0	0.183339	25.03	0.610519
2	9.66	175	1035.8	1040.3	1038.05	2.8	1.3	30.4	0.505	33	226.48	37	2	0	0	0.183339	25.03	0.685688
3	9.66	175	1035.8	1040.3	1038.05	2.8	1.3	30.4	0.505	33	226.48	37	2	0	0	0.183339	25.03	0.707688
4	9.66	175	1035.8	1040.3	1038.05	2.8	1.3	30.4	0.505	33	226.48	37	2	0	0	0.183339	25.03	0.619686
5	9.66	175	1035.8	1040.3	1038.05	2.8	1.3	30.4	0.505	33	226.48	37	2	0	0	0.183339	25.03	0.502349
6	9.66	175	1035.8	1040.3	1038.05	2.8	1.3	30.4	0.505	33	226.48	37	2	0	0	0.183339	25.03	0.753523
7	9.66	175	1035.8	1040.3	1038.05	2.8	1.3	30.4	0.505	33	226.48	37	2	0	0	0.183339	25.03	0.905694
8	9.66	175	1035.8	1040.3	1038.05	2.8	1.3	30.4	0.505	33	226.48	37	2	0	0	0.183339	25.03	0.852526
9	9.66	175	1035.8	1040.3	1038.05	2.8	1.3	30.4	0.505	33	226.48	37	2	0	0	0.183339	25.03	0.685688
10	9.66	175	1035.8	1040.3	1038.05	2.8	1.3	30.4	0.505	33	226.48	37	2	0	0	0.183339	25.03	0.705855
11	9.66	175	1035.8	1040.3	1038.05	2.8	1.3	30.4	0.505	33	226.48	37	2	0	0	0.183339	25.03	0.735189
12	9.66	175	1035.8	1040.3	1038.05	2.8	1.3	30.4	0.505	33	226.48	37	2	0	0	0.183339	25.03	0.850693
1	10.75	125	1053.1	1058.4	1055.75	2.7	0.6	25.7	0.182	33	223.72	37	2	0.0256752	95.3824	0.0401176	25.03	0.0288846
2	10.75	125	1053.1	1058.4	1055.75	2.7	0.6	25.7	0.182	33	223.72	37	2	0.0256752	95.3824	0.0401176	25.03	0.239502
3	10.75	125	1053.1	1058.4	1055.75	2.7	0.6	25.7	0.182	33	223.72	37	2	0.0256752	95.3824	0.0401176	25.03	0.154453
4	10.75	125	1053.1	1058.4	1055.75	2.7	0.6	25.7	0.182	33	223.72	37	2	0.0256752	95.3824	0.0401176	25.03	0.0798339
5	10.75	125	1053.1	1058.4	1055.75	2.7	0.6	25.7	0.182	33	223.72	37	2	0.0256752	95.3824	0.0401176	25.03	0.0581705
6	10.75	125	1053.1	1058.4	1055.75	2.7	0.6	25.7	0.182	33	223.72	37	2	0.0256752	95.3824	0.0401176	25.03	0.0533564
7	10.75	125	1053.1	1058.4	1055.75	2.7	0.6	25.7	0.182	33	223.72	37	2	0.0256752	95.3824	0.0401176	25.03	0.0577693
8	10.75	125	1053.1	1058.4	1055.75	2.7	0.6	25.7	0.182	33	223.72	37	2	0.0256752	95.3824	0.0401176	25.03	0.0485422
9	10.75	125	1053.1	1058.4	1055.75	2.7	0.6	25.7	0.182	33	223.72	37	2	0.0256752	95.3824	0.0401176	25.03	0.0340999
10	10.75	125	1053.1	1058.4	1055.75	2.7	0.6	25.7	0.182	33	223.72	37	2	0.0256752	95.3824	0.0401176	25.03	0.0232682
11	10.75	125	1053.1	1058.4	1055.75	2.7	0.6	25.7	0.182	33	223.72	37	2	0.0256752	95.3824	0.0401176	25.03	0.0437281
12	10.75	125	1053.1	1058.4	1055.75	2.7	0.6	25.7	0.182	33	223.72	37	2	0.0256752	95.3824	0.0401176	25.03	0.0377105
1	8.83	175	930.6	938.4	934.5	5.5	3.2	28.3	0.17	21	246.7	39	2	1.21644	87.6557	0.188889	24.99	0.617667
2	8.83	175	930.6	938.4	934.5	5.5	3.2	28.3	0.17	21	246.7	39	2	1.21644	87.6557	0.188889	24.99	0.270111
3	8.83	175	930.6	938.4	934.5	5.5	3.2	28.3	0.17	21	246.7	39	2	1.21644	87.6557	0.188889	24.99	1.00489
4	8.83	175	930.6	938.4	934.5	5.5	3.2	28.3	0.17	21	246.7	39	2	1.21644	87.6557	0.188889	24.99	1.22022
5	8.83	175	930.6	938.4	934.5	5.5	3.2	28.3	0.17	21	246.7	39	2	1.21644	87.6557	0.188889	24.99	1.00867
6	8.83	175	930.6	938.4	934.5	5.5	3.2	28.3	0.17	21	246.7	39	2	1.21644	87.6557	0.188889	24.99	0.674333
7	8.83	175	930.6	938.4	934.5	5.5	3.2	28.3	0.17	21	246.7	39	2	1.21644	87.6557	0.188889	24.99	0.296556
8	8.83	175	930.6	938.4	934.5	5.5	3.2	28.3	0.17	21	246.7	39	2	1.21644	87.6557	0.188889	24.99	0.143556
9	8.83	175	930.6	938.4	934.5	5.5	3.2	28.3	0.17	21	246.7	39	2	1.21644	87.6557	0.188889	24.99	0.253111
1	8.83	175	941.2	952.4	946.8	9.2	6.9	29.7	0.3	23	234.1	37	2	4.62875	87.6557	0.71875	25.03	2.35031
2	8.83	175	941.2	952.4	946.8	9.2	6.9	29.7	0.3	23	234.1	37	2	4.62875	87.6557	0.71875	25.03	1.02781
3	8.83	175	941.2	952.4	946.8	9.2	6.9	29.7	0.3	23	234.1	37	2	4.62875	87.6557	0.71875	25.03	3.82375
4	8.83	175	941.2	952.4	946.8	9.2	6.9	29.7	0.3	23	234.1	37	2	4.62875	87.6557	0.71875	25.03	4.64312
5	8.83	175	941.2	952.4	946.8	9.2	6.9	29.7	0.3	23	234.1	37	2	4.62875	87.6557	0.71875	25.03	3.83812
6	8.83	175	941.2	952.4	946.8	9.2	6.9	29.7	0.3	23	234.1	37	2	4.62875	87.6557	0.71875	25.03	2.56594
7	8.83	175	941.2	952.4	946.8	9.2	6.9	29.7	0.3	23	234.1	37	2	4.62875	87.6557	0.71875	25.03	1.12844
8	8.83	175	941.2	952.4	946.8	9.2	6.9	29.7	0.3	23	234.1	37	2	4.62875	87.6557	0.71875	25.03	0.54625
9	8.83	175	941.2	952.4	946.8	9.2	6.9	29.7	0.3	23	234.1	37	2	4.62875	87.6557	0.71875	25.03	0.963125
10	8.83	175	941.2	952.4	946.8	9.2	6.9	29.7	0.3	23	234.1	37	2	4.62875	87.6557	0.71875	25.03	2.63781
1	8.01	125	861	870.1	865.55	8.8	6.7	31.6	0.584	26	77.4	12	2	2.62026	88.3881	0.706269	24.55	4.10342
2	8.01	125	861	870.1	865.55	8.8	6.7	31.6	0.584	26	77.4	12	2	2.62026	88.3881	0.706269	24.55	6.21517
3	8.01	125	861	870.1	865.55	8.8	6.7	31.6	0.584	26	77.4	12	2	2.62026	88.3881	0.706269	24.55	6.06685
4	8.01	125	861	870.1	865.55	8.8	6.7	31.6	0.584	26	77.4	12	2	2.62026	88.3881	0.706269	24.55	4.76731
5	8.01	125	861	870.1	865.55	8.8	6.7	31.6	0.584	26	77.4	12	2	2.62026	88.3881	0.706269	24.55	5.89734
6	8.01	125	861	870.1	865.55	8.8	6.7	31.6	0.584	26	77.4	12	2	2.62026	88.3881	0.706269	24.55	6.83668
7	8.01	125	861	870.1	865.55	8.8	6.7	31.6	0.584	26	77.4	12	2	2.62026	88.3881	0.706269	24.55	7.66302
8	8.01	125	861	870.1	865.55	8.8	6.7	31.6	0.584	26	77.4	12	2	2.62026	88.3881	0.706269	24.55	7.52176
9	8.01	125	861	870.1	865.55	8.8	6.7	31.6	0.584	26	77.4	12	2	2.62026	88.3881	0.706269	24.55	5.84084
10	8.01	125	861	870.1	865.55	8.8	6.7	31.6	0.584	26	77.4	12	2	2.62026	88.3881	0.706269	24.55	4.06811
1	11.93	125	1020.4	1030	1025.2	8.3	4.8	30.5	0.485	29	228.44	37	2	1.05259	97.4156	0.657869	25.03	1.7894
2	11.93	125	1020.4	1030	1025.2	8.3	4.8	30.5	0.485	29	228.44	37	2	1.05259	97.4156	0.657869	25.03	2.85515
3	11.93	125	1020.4	1030	1025.2	8.3	4.8	30.5	0.485	29	228.44	37	2	1.05259	97.4156	0.657869	25.03	4.23667
4	11.93	125	1020.4	1030	1025.2	8.3	4.8	30.5	0.485	29	228.44	37	2	1.05259	97.4156	0.657869	25.03	3.37487
5	11.93	125	1020.4	1030	1025.2	8.3	4.8	30.5	0.485	29	228.44	37	2	1.05259	97.4156	0.657869	25.03	3.30908
6	11.93	125	1020.4	1030	1025.2	8.3	4.8	30.5	0.485	29	228.44	37	2	1.05259	97.4156	0.657869	25.03	3.09856
7	11.93	125	1020.4	1030	1025.2	8.3	4.8	30.5	0.485	29	228.44	37	2	1.05259	97.4156	0.657869	25.03	2.0986
8	11.93	125	1020.4	1030	1025.2	8.3	4.8	30.5	0.485	29	228.44	37	2	1.05259	97.4156	0.657869	25.03	1.05917
9	11.93	125	1020.4	1030	1025.2	8.3	4.8	30.5	0.485	29	228.44	37	2	1.05259	97.4156	0.657869	25.03	0.940752
10	11.93	125	1020.4	1030	1025.2	8.3	4.8	30.5	0.485	29	228.44	37	2	1.05259	97.4156	0.657869	25.03	0.65129
11	11.93	125	1020.4	1030	1025.2	8.3	4.8	30.5	0.485	29	228.44	37	2	1.05259	97.4156	0.657869	25.03	0.730234
12	11.93	125	1020.4	1030	1025.2	8.3	4.8	30.5	0.485	29	228.44	37	2	1.05259	97.4156	0.657869	25.03	0.960488
1	11.93	125	1032.7	1040.8	1036.75	6.5	2.5	30.2	0.475	23	229.44	37	2	0.53692	97.4156	0.335575	25.03	0.912765
2	11.93	125	1032.7	1040.8	1036.75	6.5	2.5	30.2	0.475	23	229.44	37	2	0.53692	97.4156	0.335575	25.03	1.4564
3	11.93	125	1032.7	1040.8	1036.75	6.5	2.5	30.2	0.475	23	229.44	37	2	0.53692	97.4156	0.335575	25.03	2.1611
4	11.93	125	1032.7	1040.8	1036.75	6.5	2.5	30.2	0.475	23	229.44	37	2	0.53692	97.4156	0.335575	25.03	1.7215
5	11.93	125	1032.7	1040.8	1036.75	6.5	2.5	30.2	0.475	23	229.44	37	2	0.53692	97.4156	0.335575	25.03	1.68794
6	11.93	125	1032.7	1040.8	1036.75	6.5	2.5	30.2	0.475	23	229.44	37	2	0.53692	97.4156	0.335575	25.03	1.58056
7	11.93	125	1032.7	1040.8	1036.75	6.5	2.5	30.2	0.475	23	229.44	37	2	0.53692	97.4156	0.335575	25.03	1.07048
8	11.93	125	1032.7	1040.8	1036.75	6.5	2.5	30.2	0.475	23	229.44	37	2	0.53692	97.4156	0.335575	25.03	0.540276
9	11.93	125	1032.7	1040.8	1036.75	6.5	2.5	30.2	0.475	23	229.44	37	2	0.53692	97.4156	0.335575	25.03	0.479873
10	11.93	125	1032.7	1040.8	1036.75	6.5	2.5	30.2	0.475	23	229.44	37	2	0.53692	97.4156	0.335575	25.03	0.332219
11	11.93	125	1032.7	1040.8	1036.75	6.5	2.5	30.2	0.475	23	229.44	37	2	0.53692	97.4156	0.335575	25.03	0.372488
12	11.93	125	1032.7	1040.8	1036.75	6.5	2.5	30.2	0.475	23	229.44	37	2	0.53692	97.4156	0.335575	25.03	0.48994
1	9.4	125	1128.2	1134.2	1131.2	5.4	4.4	32.3	1.033	31	119.36	23.6	2	1.13723	93.144	0.424341	25	0.992958
2	9.4	125	1128.2	1134.2	1131.2	5.4	4.4	32.3	1.033	31	119.36	23.6	2	1.13723	93.144	0.424341	25	0.704406
3	9.4	125	1128.2	1134.2	1131.2	5.4	4.4	32.3	1.033	31	119.36	23.6	2	1.13723	93.144	0.424341	25	0.708649
4	9.4	125	1128.2	1134.2	1131.2	5.4	4.4	32.3	1.033	31	119.36	23.6	2	1.13723	93.144	0.424341	25	0.526183
5	9.4	125	1128.2	1134.2	1131.2	5.4	4.4	32.3	1.033	31	119.36	23.6	2	1.13723	93.144	0.424341	25	0.178223
6	9.4	125	1128.2	1134.2	1131.2	5.4	4.4	32.3	1.033	31	119.36	23.6	2	1.13723	93.144	0.424341	25	0.263091
1	9.66	175	1022.3	1030.3	1026.3	6.1	3.6	32.3	1.052	34	223.94	37	2	0	0	0.591842	24.93	2.24308
2	9.66	175	1022.3	1030.3	1026.3	6.1	3.6	32.3	1.052	34	223.94	37	2	0	0	0.591842	24.93	2.20165
3	9.66	175	1022.3	1030.3	1026.3	6.1	3.6	32.3	1.052	34	223.94	37	2	0	0	0.591842	24.93	3.84106
4	9.66	175	1022.3	1030.3	1026.3	6.1	3.6	32.3	1.052	34	223.94	37	2	0	0	0.591842	24.93	4.6578
5	9.66	175	1022.3	1030.3	1026.3	6.1	3.6	32.3	1.052	34	223.94	37	2	0	0	0.591842	24.93	2.74023
6	9.66	175	1022.3	1030.3	1026.3	6.1	3.6	32.3	1.052	34	223.94	37	2	0	0	0.591842	24.93	3.5333
7	9.66	175	1022.3	1030.3	1026.3	6.1	3.6	32.3	1.052	34	223.94	37	2	0	0	0.591842	24.93	3.6931
8	9.66	175	1022.3	1030.3	1026.3	6.1	3.6	32.3	1.052	34	223.94	37	2	0	0	0.591842	24.93	3.8233
9	9.66	175	1022.3	1030.3	1026.3	6.1	3.6	32.3	1.052	34	223.94	37	2	0	0	0.591842	24.93	3.33207
10	9.66	175	1022.3	1030.3	1026.3	6.1	3.6	32.3	1.052	34	223.94	37	2	0	0	0.591842	24.93	3.03615
11	9.66	175	1022.3	1030.3	1026.3	6.1	3.6	32.3	1.052	34	223.94	37	2	0	0	0.591842	24.93	2.44431
12	9.66	175	1022.3	1030.3	1026.3	6.1	3.6	32.3	1.052	34	223.94	37	2	0	0	0.591842	24.93	2.59819
1	9.66	175	1036.9	1043.4	1040.15	4	0.9	29.4	0.205	29	224.12	37	2	0	0	0.0288326	24.93	0.109276
2	9.66	175	1036.9	1043.4	1040.15	4	0.9	29.4	0.205	29	224.12	37	2	0	0	0.0288326	24.93	0.107257
3	9.66	175	1036.9	1043.4	1040.15	4	0.9	29.4	0.205	29	224.12	37	2	0	0	0.0288326	24.93	0.187124
4	9.66	175	1036.9	1043.4	1040.15	4	0.9	29.4	0.205	29	224.12	37	2	0	0	0.0288326	24.93	0.226913
5	9.66	175	1036.9	1043.4	1040.15	4	0.9	29.4	0.205	29	224.12	37	2	0	0	0.0288326	24.93	0.133495
6	9.66	175	1036.9	1043.4	1040.15	4	0.9	29.4	0.205	29	224.12	37	2	0	0	0.0288326	24.93	0.172131
7	9.66	175	1036.9	1043.4	1040.15	4	0.9	29.4	0.205	29	224.12	37	2	0	0	0.0288326	24.93	0.179916
8	9.66	175	1036.9	1043.4	1040.15	4	0.9	29.4	0.205	29	224.12	37	2	0	0	0.0288326	24.93	0.186259
9	9.66	175	1036.9	1043.4	1040.15	4	0.9	29.4	0.205	29	224.12	37	2	0	0	0.0288326	24.93	0.162328
10	9.66	175	1036.9	1043.4	1040.15	4	0.9	29.4	0.205	29	224.12	37	2	0	0	0.0288326	24.93	0.147911
11	9.66	175	1036.9	1043.4	1040.15	4	0.9	29.4	0.205	29	224.12	37	2	0	0	0.0288326	24.93	0.119079
12	9.66	175	1036.9	1043.4	1040.15	4	0.9	29.4	0.205	29	224.12	37	2	0	0	0.0288326	24.93	0.126575
1	9.82	175	923.5	931	927.25	6.9	3.9	29.5	0.916	28	178.84	29	2	2.14377	91.8544	0.429613	25	0.403836
2	9.82	175	923.5	931	927.25	6.9	3.9	29.5	0.916	28	178.84	29	2	2.14377	91.8544	0.429613	25	0.966628
3	9.82	175	923.5	931	927.25	6.9	3.9	29.5	0.916	28	178.84	29	2	2.14377	91.8544	0.429613	25	0.627234
4	9.82	175	923.5	931	927.25	6.9	3.9	29.5	0.916	28	178.84	29	2	2.14377	91.8544	0.429613	25	0.773303
5	9.82	175	923.5	931	927.25	6.9	3.9	29.5	0.916	28	178.84	29	2	2.14377	91.8544	0.429613	25	0.330802
6	9.82	175	923.5	931	927.25	6.9	3.9	29.5	0.916	28	178.84	29	2	2.14377	91.8544	0.429613	25	0.47687
7	9.82	175	923.5	931	927.25	6.9	3.9	29.5	0.916	28	178.84	29	2	2.14377	91.8544	0.429613	25	0.231991
8	9.82	175	923.5	931	927.25	6.9	3.9	29.5	0.916	28	178.84	29	2	2.14377	91.8544	0.429613	25	0.403836
9	9.82	175	923.5	931	927.25	6.9	3.9	29.5	0.916	28	178.84	29	2	2.14377	91.8544	0.429613	25	0.53272
10	9.82	175	923.5	931	927.25	6.9	3.9	29.5	0.916	28	178.84	29	2	2.14377	91.8544	0.429613	25	0.257768
11	9.82	175	923.5	931	927.25	6.9	3.9	29.5	0.916	28	178.84	29	2	2.14377	91.8544	0.429613	25	0.279248
1	7.95	125	992.4	1001.3	996.85	6.7	4.1	30	0.472	34	109.02	17	2	0.827102	93.3682	0.362764	25.13	5.20203
2	7.95	125	992.4	1001.3	996.85	6.7	4.1	30	0.472	34	109.02	17	2	0.827102	93.3682	0.362764	25.13	6.60956
3	7.95	125	992.4	1001.3	996.85	6.7	4.1	30	0.472	34	109.02	17	2	0.827102	93.3682	0.362764	25.13	4.97712
4	7.95	125	992.4	1001.3	996.85	6.7	4.1	30	0.472	34	109.02	17	2	0.827102	93.3682	0.362764	25.13	4.38219
5	7.95	125	992.4	1001.3	996.85	6.7	4.1	30	0.472	34	109.02	17	2	0.827102	93.3682	0.362764	25.13	3.96501
6	7.95	125	992.4	1001.3	996.85	6.7	4.1	30	0.472	34	109.02	17	2	0.827102	93.3682	0.362764	25.13	4.27699
7	7.95	125	992.4	1001.3	996.85	6.7	4.1	30	0.472	34	109.02	17	2	0.827102	93.3682	0.362764	25.13	4.32415
8	7.95	125	992.4	1001.3	996.85	6.7	4.1	30	0.472	34	109.02	17	2	0.827102	93.3682	0.362764	25.13	3.1234
9	7.95	125	992.4	1001.3	996.85	6.7	4.1	30	0.472	34	109.02	17	2	0.827102	93.3682	0.362764	25.13	2.39061
10	7.95	125	992.4	1001.3	996.85	6.7	4.1	30	0.472	34	109.02	17	2	0.827102	93.3682	0.362764	25.13	1.94804
11	7.95	125	992.4	1001.3	996.85	6.7	4.1	30	0.472	34	109.02	17	2	0.827102	93.3682	0.362764	25.13	1.80656
12	7.95	125	992.4	1001.3	996.85	6.7	4.1	30	0.472	34	109.02	17	2	0.827102	93.3682	0.362764	25.13	0.740038
1	7.95	125	997.6	1001	999.3	2.1	0.7	26.4	0.162	29	144.73	23	2	0.0643565	89.8709	0.0315473	24.83	0.0668803
2	7.95	125	997.6	1001	999.3	2.1	0.7	26.4	0.162	29	144.73	23	2	0.0643565	89.8709	0.0315473	24.83	0.165623
3	7.95	125	997.6	1001	999.3	2.1	0.7	26.4	0.162	29	144.73	23	2	0.0643565	89.8709	0.0315473	24.83	0.123981
4	7.95	125	997.6	1001	999.3	2.1	0.7	26.4	0.162	29	144.73	23	2	0.0643565	89.8709	0.0315473	24.83	0.128082
5	7.95	125	997.6	1001	999.3	2.1	0.7	26.4	0.162	29	144.73	23	2	0.0643565	89.8709	0.0315473	24.83	0.0779219
6	7.95	125	997.6	1001	999.3	2.1	0.7	26.4	0.162	29	144.73	23	2	0.0643565	89.8709	0.0315473	24.83	0.111993
7	7.95	125	997.6	1001	999.3	2.1	0.7	26.4	0.162	29	144.73	23	2	0.0643565	89.8709	0.0315473	24.83	0.0722434
8	7.95	125	997.6	1001	999.3	2.1	0.7	26.4	0.162	29	144.73	23	2	0.0643565	89.8709	0.0315473	24.83	0.106945
9	7.95	125	997.6	1001	999.3	2.1	0.7	26.4	0.162	29	144.73	23	2	0.0643565	89.8709	0.0315473	24.83	0.094011
10	7.95	125	997.6	1001	999.3	2.1	0.7	26.4	0.162	29	144.73	23	2	0.0643565	89.8709	0.0315473	24.83	0.065303
11	7.95	125	997.6	1001	999.3	2.1	0.7	26.4	0.162	29	144.73	23	2	0.0643565	89.8709	0.0315473	24.83	0.0302854
1	7.95	125	1004.2	1011.6	1007.9	5.2	3.3	29.3	0.477	30	180.12	29	2	0.89333	89.8709	0.437907	25.07	0.928363
2	7.95	125	1004.2	1011.6	1007.9	5.2	3.3	29.3	0.477	30	180.12	29	2	0.89333	89.8709	0.437907	25.07	2.29901
3	7.95	125	1004.2	1011.6	1007.9	5.2	3.3	29.3	0.477	30	180.12	29	2	0.89333	89.8709	0.437907	25.07	1.72097
4	7.95	125	1004.2	1011.6	1007.9	5.2	3.3	29.3	0.477	30	180.12	29	2	0.89333	89.8709	0.437907	25.07	1.7779
5	7.95	125	1004.2	1011.6	1007.9	5.2	3.3	29.3	0.477	30	180.12	29	2	0.89333	89.8709	0.437907	25.07	1.08163
6	7.95	125	1004.2	1011.6	1007.9	5.2	3.3	29.3	0.477	30	180.12	29	2	0.89333	89.8709	0.437907	25.07	1.55457
7	7.95	125	1004.2	1011.6	1007.9	5.2	3.3	29.3	0.477	30	180.12	29	2	0.89333	89.8709	0.437907	25.07	1.00281
8	7.95	125	1004.2	1011.6	1007.9	5.2	3.3	29.3	0.477	30	180.12	29	2	0.89333	89.8709	0.437907	25.07	1.4845
9	7.95	125	1004.2	1011.6	1007.9	5.2	3.3	29.3	0.477	30	180.12	29	2	0.89333	89.8709	0.437907	25.07	1.30496
10	7.95	125	1004.2	1011.6	1007.9	5.2	3.3	29.3	0.477	30	180.12	29	2	0.89333	89.8709	0.437907	25.07	0.906467
11	7.95	125	1004.2	1011.6	1007.9	5.2	3.3	29.3	0.477	30	180.12	29	2	0.89333	89.8709	0.437907	25.07	0.420391
1	7.95	125	976.8	980.5	978.65	2.8	1.7	30.6	0.551	35	141.14	23	2	0.243508	96.0566	0.167937	25.27	1.89097
2	7.95	125	976.8	980.5	978.65	2.8	1.7	30.6	0.551	35	141.14	23	2	0.243508	96.0566	0.167937	25.27	1.36029
3	7.95	125	976.8	980.5	978.65	2.8	1.7	30.6	0.551	35	141.14	23	2	0.243508	96.0566	0.167937	25.27	1.49632
4	7.95	125	976.8	980.5	978.65	2.8	1.7	30.6	0.551	35	141.14	23	2	0.243508	96.0566	0.167937	25.27	1.15205
5	7.95	125	976.8	980.5	978.65	2.8	1.7	30.6	0.551	35	141.14	23	2	0.243508	96.0566	0.167937	25.27	1.77341
6	7.95	125	976.8	980.5	978.65	2.8	1.7	30.6	0.551	35	141.14	23	2	0.243508	96.0566	0.167937	25.27	1.03281
7	7.95	125	976.8	980.5	978.65	2.8	1.7	30.6	0.551	35	141.14	23	2	0.243508	96.0566	0.167937	25.27	1.85402
8	7.95	125	976.8	980.5	978.65	2.8	1.7	30.6	0.551	35	141.14	23	2	0.243508	96.0566	0.167937	25.27	1.51647
9	7.95	125	976.8	980.5	978.65	2.8	1.7	30.6	0.551	35	141.14	23	2	0.243508	96.0566	0.167937	25.27	1.02945
10	7.95	125	976.8	980.5	978.65	2.8	1.7	30.6	0.551	35	141.14	23	2	0.243508	96.0566	0.167937	25.27	0.790981
11	7.95	125	976.8	980.5	978.65	2.8	1.7	30.6	0.551	35	141.14	23	2	0.243508	96.0566	0.167937	25.27	0.888385
12	7.95	125	976.8	980.5	978.65	2.8	1.7	30.6	0.551	35	141.14	23	2	0.243508	96.0566	0.167937	25.27	0.547473
1	7.95	125	851.8	853.8	852.8	1.6	1.3	27.2	0.118	22	125.6	17	2	0.0634459	95.6779	0.0869122	24.94	0.00695297
2	7.95	125	851.8	853.8	852.8	1.6	1.3	27.2	0.118	22	125.6	17	2	0.0634459	95.6779	0.0869122	24.94	0.0208589
3	7.95	125	851.8	853.8	852.8	1.6	1.3	27.2	0.118	22	125.6	17	2	0.0634459	95.6779	0.0869122	24.94	0.0330266
4	7.95	125	851.8	853.8	852.8	1.6	1.3	27.2	0.118	22	125.6	17	2	0.0634459	95.6779	0.0869122	24.94	0.0756136
5	7.95	125	851.8	853.8	852.8	1.6	1.3	27.2	0.118	22	125.6	17	2	0.0634459	95.6779	0.0869122	24.94	0.116462
6	7.95	125	851.8	853.8	852.8	1.6	1.3	27.2	0.118	22	125.6	17	2	0.0634459	95.6779	0.0869122	24.94	0.13819
7	7.95	125	851.8	853.8	852.8	1.6	1.3	27.2	0.118	22	125.6	17	2	0.0634459	95.6779	0.0869122	24.94	0.0938652
8	7.95	125	851.8	853.8	852.8	1.6	1.3	27.2	0.118	22	125.6	17	2	0.0634459	95.6779	0.0869122	24.94	0.092996
9	7.95	125	851.8	853.8	852.8	1.6	1.3	27.2	0.118	22	125.6	17	2	0.0634459	95.6779	0.0869122	24.94	0.0182516
10	7.95	125	851.8	853.8	852.8	1.6	1.3	27.2	0.118	22	125.6	17	2	0.0634459	95.6779	0.0869122	24.94	0.0208589
11	7.95	125	851.8	853.8	852.8	1.6	1.3	27.2	0.118	22	125.6	17	2	0.0634459	95.6779	0.0869122	24.94	0.000869122
1	7.95	125	878.9	884.1	881.5	3.1	0.7	27.6	0.126	29	143	23	2	0.0226916	95.6539	0.0206287	25.05	0.17225
2	7.95	125	878.9	884.1	881.5	3.1	0.7	27.6	0.126	29	143	23	2	0.0226916	95.6539	0.0206287	25.05	0.241149
3	7.95	125	878.9	884.1	881.5	3.1	0.7	27.6	0.126	29	143	23	2	0.0226916	95.6539	0.0206287	25.05	0.239293
4	7.95	125	878.9	884.1	881.5	3.1	0.7	27.6	0.126	29	143	23	2	0.0226916	95.6539	0.0206287	25.05	0.29334
5	7.95	125	878.9	884.1	881.5	3.1	0.7	27.6	0.126	29	143	23	2	0.0226916	95.6539	0.0206287	25.05	0.287358
6	7.95	125	878.9	884.1	881.5	3.1	0.7	27.6	0.126	29	143	23	2	0.0226916	95.6539	0.0206287	25.05	0.247132
7	7.95	125	878.9	884.1	881.5	3.1	0.7	27.6	0.126	29	143	23	2	0.0226916	95.6539	0.0206287	25.05	0.248163
8	7.95	125	878.9	884.1	881.5	3.1	0.7	27.6	0.126	29	143	23	2	0.0226916	95.6539	0.0206287	25.05	0.233517
9	7.95	125	878.9	884.1	881.5	3.1	0.7	27.6	0.126	29	143	23	2	0.0226916	95.6539	0.0206287	25.05	0.193084
10	7.95	125	878.9	884.1	881.5	3.1	0.7	27.6	0.126	29	143	23	2	0.0226916	95.6539	0.0206287	25.05	0.174106
11	7.95	125	878.9	884.1	881.5	3.1	0.7	27.6	0.126	29	143	23	2	0.0226916	95.6539	0.0206287	25.05	0.223615
1	7.95	125	890.1	893.9	892	3.2	2.3	31.2	0.728	25	140.3	23	2	0.430779	95.6539	0.391618	25.05	3.27001
2	7.95	125	890.1	893.9	892	3.2	2.3	31.2	0.728	25	140.3	23	2	0.430779	95.6539	0.391618	25.05	4.57801
3	7.95	125	890.1	893.9	892	3.2	2.3	31.2	0.728	25	140.3	23	2	0.430779	95.6539	0.391618	25.05	4.54276
4	7.95	125	890.1	893.9	892	3.2	2.3	31.2	0.728	25	140.3	23	2	0.430779	95.6539	0.391618	25.05	5.5688
5	7.95	125	890.1	893.9	892	3.2	2.3	31.2	0.728	25	140.3	23	2	0.430779	95.6539	0.391618	25.05	5.45523
6	7.95	125	890.1	893.9	892	3.2	2.3	31.2	0.728	25	140.3	23	2	0.430779	95.6539	0.391618	25.05	4.69158
7	7.95	125	890.1	893.9	892	3.2	2.3	31.2	0.728	25	140.3	23	2	0.430779	95.6539	0.391618	25.05	4.71116
8	7.95	125	890.1	893.9	892	3.2	2.3	31.2	0.728	25	140.3	23	2	0.430779	95.6539	0.391618	25.05	4.43311
9	7.95	125	890.1	893.9	892	3.2	2.3	31.2	0.728	25	140.3	23	2	0.430779	95.6539	0.391618	25.05	3.66554
10	7.95	125	890.1	893.9	892	3.2	2.3	31.2	0.728	25	140.3	23	2	0.430779	95.6539	0.391618	25.05	3.30525
11	7.95	125	890.1	893.9	892	3.2	2.3	31.2	0.728	25	140.3	23	2	0.430779	95.6539	0.391618	25.05	4.24513
1	7.95	125	896.1	902.2	899.15	5.5	3.5	30.4	0.718	25	105.9	17	2	0.646529	95.6539	0.587754	24.94	4.90774
2	7.95	125	896.1	902.2	899.15	5.5	3.5	30.4	0.718	25	105.9	17	2	0.646529	95.6539	0.587754	24.94	6.87084
3	7.95	125	896.1	902.2	899.15	5.5	3.5	30.4	0.718	25	105.9	17	2	0.646529	95.6539	0.587754	24.94	6.81794
4	7.95	125	896.1	902.2	899.15	5.5	3.5	30.4	0.718	25	105.9	17	2	0.646529	95.6539	0.587754	24.94	8.35786
5	7.95	125	896.1	902.2	899.15	5.5	3.5	30.4	0.718	25	105.9	17	2	0.646529	95.6539	0.587754	24.94	8.18741
6	7.95	125	896.1	902.2	899.15	5.5	3.5	30.4	0.718	25	105.9	17	2	0.646529	95.6539	0.587754	24.94	7.04129
7	7.95	125	896.1	902.2	899.15	5.5	3.5	30.4	0.718	25	105.9	17	2	0.646529	95.6539	0.587754	24.94	7.07068
8	7.95	125	896.1	902.2	899.15	5.5	3.5	30.4	0.718	25	105.9	17	2	0.646529	95.6539	0.587754	24.94	6.65337
9	7.95	125	896.1	902.2	899.15	5.5	3.5	30.4	0.718	25	105.9	17	2	0.646529	95.6539	0.587754	24.94	5.50138
10	7.95	125	896.1	902.2	899.15	5.5	3.5	30.4	0.718	25	105.9	17	2	0.646529	95.6539	0.587754	24.94	4.96064
11	7.95	125	896.1	902.2	899.15	5.5	3.5	30.4	0.718	25	105.9	17	2	0.646529	95.6539	0.587754	24.94	6.37125
1	7.37	175	907.2	916.6	911.9	8.8	7.6	29.7	0.18	32	177.34	29	2	0.739571	91.0157	0.205436	25.13	0.117099
2	7.37	175	907.2	916.6	911.9	8.8	7.6	29.7	0.18	32	177.34	29	2	0.739571	91.0157	0.205436	25.13	0.186947
3	7.37	175	907.2	916.6	911.9	8.8	7.6	29.7	0.18	32	177.34	29	2	0.739571	91.0157	0.205436	25.13	0.252687
4	7.37	175	907.2	916.6	911.9	8.8	7.6	29.7	0.18	32	177.34	29	2	0.739571	91.0157	0.205436	25.13	0.400601
5	7.37	175	907.2	916.6	911.9	8.8	7.6	29.7	0.18	32	177.34	29	2	0.739571	91.0157	0.205436	25.13	0.324589
6	7.37	175	907.2	916.6	911.9	8.8	7.6	29.7	0.18	32	177.34	29	2	0.739571	91.0157	0.205436	25.13	0.456068
7	7.37	175	907.2	916.6	911.9	8.8	7.6	29.7	0.18	32	177.34	29	2	0.739571	91.0157	0.205436	25.13	0.314317
8	7.37	175	907.2	916.6	911.9	8.8	7.6	29.7	0.18	32	177.34	29	2	0.739571	91.0157	0.205436	25.13	0.382111
9	7.37	175	907.2	916.6	911.9	8.8	7.6	29.7	0.18	32	177.34	29	2	0.739571	91.0157	0.205436	25.13	0.260904
10	7.37	175	907.2	916.6	911.9	8.8	7.6	29.7	0.18	32	177.34	29	2	0.739571	91.0157	0.205436	25.13	0.601928
11	7.37	175	907.2	916.6	911.9	8.8	7.6	29.7	0.18	32	177.34	29	2	0.739571	91.0157	0.205436	25.13	0.291719
12	7.37	175	907.2	916.6	911.9	8.8	7.6	29.7	0.18	32	177.34	29	2	0.739571	91.0157	0.205436	25.13	0.314317
1	8.01	125	947.9	978.9	963.4	2.9	2.2	29.1	0.934	22	141.9	23	2	0	0	0.222839	25.05	0.679659
2	8.01	125	947.9	978.9	963.4	2.9	2.2	29.1	0.934	22	141.9	23	2	0	0	0.222839	25.05	0.648462
3	8.01	125	947.9	978.9	963.4	2.9	2.2	29.1	0.934	22	141.9	23	2	0	0	0.222839	25.05	0.45682
4	8.01	125	947.9	978.9	963.4	2.9	2.2	29.1	0.934	22	141.9	23	2	0	0	0.222839	25.05	0.392197
5	8.01	125	947.9	978.9	963.4	2.9	2.2	29.1	0.934	22	141.9	23	2	0	0	0.222839	25.05	0.438993
6	8.01	125	947.9	978.9	963.4	2.9	2.2	29.1	0.934	22	141.9	23	2	0	0	0.222839	25.05	0.566011
7	8.01	125	947.9	978.9	963.4	2.9	2.2	29.1	0.934	22	141.9	23	2	0	0	0.222839	25.05	0.737598
8	8.01	125	947.9	978.9	963.4	2.9	2.2	29.1	0.934	22	141.9	23	2	0	0	0.222839	25.05	0.58161
9	8.01	125	947.9	978.9	963.4	2.9	2.2	29.1	0.934	22	141.9	23	2	0	0	0.222839	25.05	0.804449
10	8.01	125	947.9	978.9	963.4	2.9	2.2	29.1	0.934	22	141.9	23	2	0	0	0.222839	25.05	0.681888
11	8.01	125	947.9	978.9	963.4	2.9	2.2	29.1	0.934	22	141.9	23	2	0	0	0.222839	25.05	0.909184
12	8.01	125	947.9	978.9	963.4	2.9	2.2	29.1	0.934	22	141.9	23	2	0	0	0.222839	25.05	1.25013
1	9.02	175	900.6	906.4	903.5	4.4	3.8	26.3	0.3	26	223.86	37	2	3.45	84.8285	1	25.13	3.69
2	9.02	175	900.6	906.4	903.5	4.4	3.8	26.3	0.3	26	223.86	37	2	3.45	84.8285	1	25.13	3.28
3	9.02	175	900.6	906.4	903.5	4.4	3.8	26.3	0.3	26	223.86	37	2	3.45	84.8285	1	25.13	8.53
4	9.02	175	900.6	906.4	903.5	4.4	3.8	26.3	0.3	26	223.86	37	2	3.45	84.8285	1	25.13	5.39
5	9.02	175	900.6	906.4	903.5	4.4	3.8	26.3	0.3	26	223.86	37	2	3.45	84.8285	1	25.13	2.91
6	9.02	175	900.6	906.4	903.5	4.4	3.8	26.3	0.3	26	223.86	37	2	3.45	84.8285	1	25.13	2.08
7	9.02	175	900.6	906.4	903.5	4.4	3.8	26.3	0.3	26	223.86	37	2	3.45	84.8285	1	25.13	1.36
8	9.02	175	900.6	906.4	903.5	4.4	3.8	26.3	0.3	26	223.86	37	2	3.45	84.8285	1	25.13	0.31
1	7.95	125	816.4	820	818.2	2.6	1.1	28.4	0.424	20	140.86	23	2	0.473629	84.9802	0.249278	24.83	1.56547
2	7.95	125	816.4	820	818.2	2.6	1.1	28.4	0.424	20	140.86	23	2	0.473629	84.9802	0.249278	24.83	0.887431
3	7.95	125	816.4	820	818.2	2.6	1.1	28.4	0.424	20	140.86	23	2	0.473629	84.9802	0.249278	24.83	1.17909
4	7.95	125	816.4	820	818.2	2.6	1.1	28.4	0.424	20	140.86	23	2	0.473629	84.9802	0.249278	24.83	1.26384
5	7.95	125	816.4	820	818.2	2.6	1.1	28.4	0.424	20	140.86	23	2	0.473629	84.9802	0.249278	24.83	1.19404
6	7.95	125	816.4	820	818.2	2.6	1.1	28.4	0.424	20	140.86	23	2	0.473629	84.9802	0.249278	24.83	1.45329
7	7.95	125	816.4	820	818.2	2.6	1.1	28.4	0.424	20	140.86	23	2	0.473629	84.9802	0.249278	24.83	1.57544
8	7.95	125	816.4	820	818.2	2.6	1.1	28.4	0.424	20	140.86	23	2	0.473629	84.9802	0.249278	24.83	2.01168
9	7.95	125	816.4	820	818.2	2.6	1.1	28.4	0.424	20	140.86	23	2	0.473629	84.9802	0.249278	24.83	1.64773
10	7.95	125	816.4	820	818.2	2.6	1.1	28.4	0.424	20	140.86	23	2	0.473629	84.9802	0.249278	24.83	2.73708
11	7.95	125	816.4	820	818.2	2.6	1.1	28.4	0.424	20	140.86	23	2	0.473629	84.9802	0.249278	24.83	2.44542
12	7.95	125	816.4	820	818.2	2.6	1.1	28.4	0.424	20	140.86	23	2	0.473629	84.9802	0.249278	24.83	2.06901
1	7.95	125	826	830.2	828.1	3	2	30.5	0.63	22	175.58	29	2	1.27953	84.9802	0.673437	25.13	4.22918
2	7.95	125	826	830.2	828.1	3	2	30.5	0.63	22	175.58	29	2	1.27953	84.9802	0.673437	25.13	2.39743
3	7.95	125	826	830.2	828.1	3	2	30.5	0.63	22	175.58	29	2	1.27953	84.9802	0.673437	25.13	3.18536
4	7.95	125	826	830.2	828.1	3	2	30.5	0.63	22	175.58	29	2	1.27953	84.9802	0.673437	25.13	3.41432
5	7.95	125	826	830.2	828.1	3	2	30.5	0.63	22	175.58	29	2	1.27953	84.9802	0.673437	25.13	3.22576
6	7.95	125	826	830.2	828.1	3	2	30.5	0.63	22	175.58	29	2	1.27953	84.9802	0.673437	25.13	3.92614
7	7.95	125	826	830.2	828.1	3	2	30.5	0.63	22	175.58	29	2	1.27953	84.9802	0.673437	25.13	4.25612
8	7.95	125	826	830.2	828.1	3	2	30.5	0.63	22	175.58	29	2	1.27953	84.9802	0.673437	25.13	5.43463
9	7.95	125	826	830.2	828.1	3	2	30.5	0.63	22	175.58	29	2	1.27953	84.9802	0.673437	25.13	4.45142
10	7.95	125	826	830.2	828.1	3	2	30.5	0.63	22	175.58	29	2	1.27953	84.9802	0.673437	25.13	7.39433
11	7.95	125	826	830.2	828.1	3	2	30.5	0.63	22	175.58	29	2	1.27953	84.9802	0.673437	25.13	6.60641
12	7.95	125	826	830.2	828.1	3	2	30.5	0.63	22	175.58	29	2	1.27953	84.9802	0.673437	25.13	5.58952
1	7.95	125	813.4	818.9	816.15	3.3	0.2	25.4	0.058	20	221.24	37	2	0.0380981	77.8989	0.00751441	25.13	0.015104
2	7.95	125	813.4	818.9	816.15	3.3	0.2	25.4	0.058	20	221.24	37	2	0.0380981	77.8989	0.00751441	25.13	0.0250981
3	7.95	125	813.4	818.9	816.15	3.3	0.2	25.4	0.058	20	221.24	37	2	0.0380981	77.8989	0.00751441	25.13	0.0341906
4	7.95	125	813.4	818.9	816.15	3.3	0.2	25.4	0.058	20	221.24	37	2	0.0380981	77.8989	0.00751441	25.13	0.0217167
5	7.95	125	813.4	818.9	816.15	3.3	0.2	25.4	0.058	20	221.24	37	2	0.0380981	77.8989	0.00751441	25.13	0.0250981
6	7.95	125	813.4	818.9	816.15	3.3	0.2	25.4	0.058	20	221.24	37	2	0.0380981	77.8989	0.00751441	25.13	0.0199883
7	7.95	125	813.4	818.9	816.15	3.3	0.2	25.4	0.058	20	221.24	37	2	0.0380981	77.8989	0.00751441	25.13	0.0280288
8	7.95	125	813.4	818.9	816.15	3.3	0.2	25.4	0.058	20	221.24	37	2	0.0380981	77.8989	0.00751441	25.13	0.0126242
9	7.95	125	813.4	818.9	816.15	3.3	0.2	25.4	0.058	20	221.24	37	2	0.0380981	77.8989	0.00751441	25.13	0.0123236
1	7.95	125	821.1	827.1	824.1	5.2	3.5	29.5	0.402	19	222.08	37	2	4.62103	77.8989	0.911447	25.13	1.83201
2	7.95	125	821.1	827.1	824.1	5.2	3.5	29.5	0.402	19	222.08	37	2	4.62103	77.8989	0.911447	25.13	3.04423
3	7.95	125	821.1	827.1	824.1	5.2	3.5	29.5	0.402	19	222.08	37	2	4.62103	77.8989	0.911447	25.13	4.14708
4	7.95	125	821.1	827.1	824.1	5.2	3.5	29.5	0.402	19	222.08	37	2	4.62103	77.8989	0.911447	25.13	2.63408
5	7.95	125	821.1	827.1	824.1	5.2	3.5	29.5	0.402	19	222.08	37	2	4.62103	77.8989	0.911447	25.13	3.04423
6	7.95	125	821.1	827.1	824.1	5.2	3.5	29.5	0.402	19	222.08	37	2	4.62103	77.8989	0.911447	25.13	2.42445
7	7.95	125	821.1	827.1	824.1	5.2	3.5	29.5	0.402	19	222.08	37	2	4.62103	77.8989	0.911447	25.13	3.3997
8	7.95	125	821.1	827.1	824.1	5.2	3.5	29.5	0.402	19	222.08	37	2	4.62103	77.8989	0.911447	25.13	1.53123
9	7.95	125	821.1	827.1	824.1	5.2	3.5	29.5	0.402	19	222.08	37	2	4.62103	77.8989	0.911447	25.13	1.49477
1	7.95	125	991.2	994.4	992.8	1.3	0.7	29.7	0.383	30	77.49	12	2	0.284372	90.0101	0.143622	25.07	0.0861735
2	7.95	125	991.2	994.4	992.8	1.3	0.7	29.7	0.383	30	77.49	12	2	0.284372	90.0101	0.143622	25.07	0.213997
3	7.95	125	991.2	994.4	992.8	1.3	0.7	29.7	0.383	30	77.49	12	2	0.284372	90.0101	0.143622	25.07	0.275755
4	7.95	125	991.2	994.4	992.8	1.3	0.7	29.7	0.383	30	77.49	12	2	0.284372	90.0101	0.143622	25.07	0.0732474
1	7.37	175	887.2	896.4	891.8	8.4	5.3	30.8	0.29	35	222.9	37	2	0.232035	95.232	0.30938	25.03	0.696105
2	7.37	175	887.2	896.4	891.8	8.4	5.3	30.8	0.29	35	222.9	37	2	0.232035	95.232	0.30938	25.03	1.93363
3	7.37	175	887.2	896.4	891.8	8.4	5.3	30.8	0.29	35	222.9	37	2	0.232035	95.232	0.30938	25.03	3.16805
4	7.37	175	887.2	896.4	891.8	8.4	5.3	30.8	0.29	35	222.9	37	2	0.232035	95.232	0.30938	25.03	4.06525
5	7.37	175	887.2	896.4	891.8	8.4	5.3	30.8	0.29	35	222.9	37	2	0.232035	95.232	0.30938	25.03	2.85558
6	7.37	175	887.2	896.4	891.8	8.4	5.3	30.8	0.29	35	222.9	37	2	0.232035	95.232	0.30938	25.03	3.62593
7	7.37	175	887.2	896.4	891.8	8.4	5.3	30.8	0.29	35	222.9	37	2	0.232035	95.232	0.30938	25.03	3.13711
8	7.37	175	887.2	896.4	891.8	8.4	5.3	30.8	0.29	35	222.9	37	2	0.232035	95.232	0.30938	25.03	2.95767
9	7.37	175	887.2	896.4	891.8	8.4	5.3	30.8	0.29	35	222.9	37	2	0.232035	95.232	0.30938	25.03	3.2423
10	7.37	175	887.2	896.4	891.8	8.4	5.3	30.8	0.29	35	222.9	37	2	0.232035	95.232	0.30938	25.03	2.88033
11	7.37	175	887.2	896.4	891.8	8.4	5.3	30.8	0.29	35	222.9	37	2	0.232035	95.232	0.30938	25.03	3.23612
12	7.37	175	887.2	896.4	891.8	8.4	5.3	30.8	0.29	35	222.9	37	2	0.232035	95.232	0.30938	25.03	2.36366
1	7.37	175	925.4	930.5	927.95	4.2	2	29.9	0.45	29	223.46	37	2	0.13587	95.232	0.181159	25.03	0.407609
2	7.37	175	925.4	930.5	927.95	4.2	2	29.9	0.45	29	223.46	37	2	0.13587	95.232	0.181159	25.03	1.13225
3	7.37	175	925.4	930.5	927.95	4.2	2	29.9	0.45	29	223.46	37	2	0.13587	95.232	0.181159	25.03	1.85507
4	7.37	175	925.4	930.5	927.95	4.2	2	29.9	0.45	29	223.46	37	2	0.13587	95.232	0.181159	25.03	2.38043
5	7.37	175	925.4	930.5	927.95	4.2	2	29.9	0.45	29	223.46	37	2	0.13587	95.232	0.181159	25.03	1.6721
6	7.37	175	925.4	930.5	927.95	4.2	2	29.9	0.45	29	223.46	37	2	0.13587	95.232	0.181159	25.03	2.12319
7	7.37	175	925.4	930.5	927.95	4.2	2	29.9	0.45	29	223.46	37	2	0.13587	95.232	0.181159	25.03	1.83696
8	7.37	175	925.4	930.5	927.95	4.2	2	29.9	0.45	29	223.46	37	2	0.13587	95.232	0.181159	25.03	1.73188
9	7.37	175	925.4	930.5	927.95	4.2	2	29.9	0.45	29	223.46	37	2	0.13587	95.232	0.181159	25.03	1.89855
10	7.37	175	925.4	930.5	927.95	4.2	2	29.9	0.45	29	223.46	37	2	0.13587	95.232	0.181159	25.03	1.68659
11	7.37	175	925.4	930.5	927.95	4.2	2	29.9	0.45	29	223.46	37	2	0.13587	95.232	0.181159	25.03	1.89493
12	7.37	175	925.4	930.5	927.95	4.2	2	29.9	0.45	29	223.46	37	2	0.13587	95.232	0.181159	25.03	1.38406
1	7.95	125	852.1	860.8	856.45	6.8	4.7	30.3	0.49	33	118.76	19	2	1.18148	90.014	0.552093	25.03	7.387
2	7.95	125	852.1	860.8	856.45	6.8	4.7	30.3	0.49	33	118.76	19	2	1.18148	90.014	0.552093	25.03	6.14479
3	7.95	125	852.1	860.8	856.45	6.8	4.7	30.3	0.49	33	118.76	19	2	1.18148	90.014	0.552093	25.03	5.07925
4	7.95	125	852.1	860.8	856.45	6.8	4.7	30.3	0.49	33	118.76	19	2	1.18148	90.014	0.552093	25.03	2.45681
5	7.95	125	852.1	860.8	856.45	6.8	4.7	30.3	0.49	33	118.76	19	2	1.18148	90.014	0.552093	25.03	1.28638
6	7.95	125	852.1	860.8	856.45	6.8	4.7	30.3	0.49	33	118.76	19	2	1.18148	90.014	0.552093	25.03	1.51273
7	7.95	125	852.1	860.8	856.45	6.8	4.7	30.3	0.49	33	118.76	19	2	1.18148	90.014	0.552093	25.03	2.27462
8	7.95	125	852.1	860.8	856.45	6.8	4.7	30.3	0.49	33	118.76	19	2	1.18148	90.014	0.552093	25.03	2.25254
9	7.95	125	852.1	860.8	856.45	6.8	4.7	30.3	0.49	33	118.76	19	2	1.18148	90.014	0.552093	25.03	2.2415
10	7.95	125	852.1	860.8	856.45	6.8	4.7	30.3	0.49	33	118.76	19	2	1.18148	90.014	0.552093	25.03	2.07587
11	7.95	125	852.1	860.8	856.45	6.8	4.7	30.3	0.49	33	118.76	19	2	1.18148	90.014	0.552093	25.03	1.56242
1	7.95	125	841.9	849.3	845.6	6.3	4	29.8	0.409	30	108.52	17	2	2.1316	85.4111	0.484454	25.03	3.0133
2	7.95	125	841.9	849.3	845.6	6.3	4	29.8	0.409	30	108.52	17	2	2.1316	85.4111	0.484454	25.03	1.47758
3	7.95	125	841.9	849.3	845.6	6.3	4	29.8	0.409	30	108.52	17	2	2.1316	85.4111	0.484454	25.03	1.49212
4	7.95	125	841.9	849.3	845.6	6.3	4	29.8	0.409	30	108.52	17	2	2.1316	85.4111	0.484454	25.03	0.765437
1	7.95	125	862.7	871	866.85	6.4	4	29.3	0.406	28	109.06	17	2	2.11596	85.4111	0.4809	25.03	2.9912
2	7.95	125	862.7	871	866.85	6.4	4	29.3	0.406	28	109.06	17	2	2.11596	85.4111	0.4809	25.03	1.46675
3	7.95	125	862.7	871	866.85	6.4	4	29.3	0.406	28	109.06	17	2	2.11596	85.4111	0.4809	25.03	1.48117
4	7.95	125	862.7	871	866.85	6.4	4	29.3	0.406	28	109.06	17	2	2.11596	85.4111	0.4809	25.03	0.759822
1	10.59	125	1061.1	1070.4	1065.75	8.4	6.7	31.5	0.984	33	123	19	2	1.2069	88.883	0.577465	24.9	0.871972
2	10.59	125	1061.1	1070.4	1065.75	8.4	6.7	31.5	0.984	33	123	19	2	1.2069	88.883	0.577465	24.9	2.57549
3	10.59	125	1061.1	1070.4	1065.75	8.4	6.7	31.5	0.984	33	123	19	2	1.2069	88.883	0.577465	24.9	1.35127
4	10.59	125	1061.1	1070.4	1065.75	8.4	6.7	31.5	0.984	33	123	19	2	1.2069	88.883	0.577465	24.9	1.38592
5	10.59	125	1061.1	1070.4	1065.75	8.4	6.7	31.5	0.984	33	123	19	2	1.2069	88.883	0.577465	24.9	1.47831
6	10.59	125	1061.1	1070.4	1065.75	8.4	6.7	31.5	0.984	33	123	19	2	1.2069	88.883	0.577465	24.9	1.51873
7	10.59	125	1061.1	1070.4	1065.75	8.4	6.7	31.5	0.984	33	123	19	2	1.2069	88.883	0.577465	24.9	1.39746
8	10.59	125	1061.1	1070.4	1065.75	8.4	6.7	31.5	0.984	33	123	19	2	1.2069	88.883	0.577465	24.9	1.14338
9	10.59	125	1061.1	1070.4	1065.75	8.4	6.7	31.5	0.984	33	123	19	2	1.2069	88.883	0.577465	24.9	1.45521
10	10.59	125	1061.1	1070.4	1065.75	8.4	6.7	31.5	0.984	33	123	19	2	1.2069	88.883	0.577465	24.9	1.54761
11	10.59	125	1061.1	1070.4	1065.75	8.4	6.7	31.5	0.984	33	123	19	2	1.2069	88.883	0.577465	24.9	1.18958
12	10.59	125	1061.1	1070.4	1065.75	8.4	6.7	31.5	0.984	33	123	19	2	1.2069	88.883	0.577465	24.9	1.62268
1	10.59	125	1075	1086.8	1080.9	10.3	5.7	31.5	0.782	31	123	19	2	0.815987	88.883	0.390425	24.9	0.589541
2	10.59	125	1075	1086.8	1080.9	10.3	5.7	31.5	0.782	31	123	19	2	0.815987	88.883	0.390425	24.9	1.74129
3	10.59	125	1075	1086.8	1080.9	10.3	5.7	31.5	0.782	31	123	19	2	0.815987	88.883	0.390425	24.9	0.913594
4	10.59	125	1075	1086.8	1080.9	10.3	5.7	31.5	0.782	31	123	19	2	0.815987	88.883	0.390425	24.9	0.937019
5	10.59	125	1075	1086.8	1080.9	10.3	5.7	31.5	0.782	31	123	19	2	0.815987	88.883	0.390425	24.9	0.999487
6	10.59	125	1075	1086.8	1080.9	10.3	5.7	31.5	0.782	31	123	19	2	0.815987	88.883	0.390425	24.9	1.02682
7	10.59	125	1075	1086.8	1080.9	10.3	5.7	31.5	0.782	31	123	19	2	0.815987	88.883	0.390425	24.9	0.944828
8	10.59	125	1075	1086.8	1080.9	10.3	5.7	31.5	0.782	31	123	19	2	0.815987	88.883	0.390425	24.9	0.773041
9	10.59	125	1075	1086.8	1080.9	10.3	5.7	31.5	0.782	31	123	19	2	0.815987	88.883	0.390425	24.9	0.98387
10	10.59	125	1075	1086.8	1080.9	10.3	5.7	31.5	0.782	31	123	19	2	0.815987	88.883	0.390425	24.9	1.04634
11	10.59	125	1075	1086.8	1080.9	10.3	5.7	31.5	0.782	31	123	19	2	0.815987	88.883	0.390425	24.9	0.804275
12	10.59	125	1075	1086.8	1080.9	10.3	5.7	31.5	0.782	31	123	19	2	0.815987	88.883	0.390425	24.9	1.09709
1	10.59	125	1099.9	1104.9	1102.4	4.5	1.4	28.4	0.194	30	181.52	29	2	0.0497201	88.883	0.0237895	24.9	0.0359221
2	10.59	125	1099.9	1104.9	1102.4	4.5	1.4	28.4	0.194	30	181.52	29	2	0.0497201	88.883	0.0237895	24.9	0.106101
3	10.59	125	1099.9	1104.9	1102.4	4.5	1.4	28.4	0.194	30	181.52	29	2	0.0497201	88.883	0.0237895	24.9	0.0556674
4	10.59	125	1099.9	1104.9	1102.4	4.5	1.4	28.4	0.194	30	181.52	29	2	0.0497201	88.883	0.0237895	24.9	0.0570948
5	10.59	125	1099.9	1104.9	1102.4	4.5	1.4	28.4	0.194	30	181.52	29	2	0.0497201	88.883	0.0237895	24.9	0.0609011
6	10.59	125	1099.9	1104.9	1102.4	4.5	1.4	28.4	0.194	30	181.52	29	2	0.0497201	88.883	0.0237895	24.9	0.0625664
7	10.59	125	1099.9	1104.9	1102.4	4.5	1.4	28.4	0.194	30	181.52	29	2	0.0497201	88.883	0.0237895	24.9	0.0575706
8	10.59	125	1099.9	1104.9	1102.4	4.5	1.4	28.4	0.194	30	181.52	29	2	0.0497201	88.883	0.0237895	24.9	0.0471032
9	10.59	125	1099.9	1104.9	1102.4	4.5	1.4	28.4	0.194	30	181.52	29	2	0.0497201	88.883	0.0237895	24.9	0.0599495
10	10.59	125	1099.9	1104.9	1102.4	4.5	1.4	28.4	0.194	30	181.52	29	2	0.0497201	88.883	0.0237895	24.9	0.0637559
11	10.59	125	1099.9	1104.9	1102.4	4.5	1.4	28.4	0.194	30	181.52	29	2	0.0497201	88.883	0.0237895	24.9	0.0490064
12	10.59	125	1099.9	1104.9	1102.4	4.5	1.4	28.4	0.194	30	181.52	29	2	0.0497201	88.883	0.0237895	24.9	0.0668485
1	7.95	125	890.6	895.9	893.25	3.1	1.3	28.6	0.381	28	175.45	29	2	0.381509	89.5571	0.118114	25	0.359067
2	7.95	125	890.6	895.9	893.25	3.1	1.3	28.6	0.381	28	175.45	29	2	0.381509	89.5571	0.118114	25	0.439385
3	7.95	125	890.6	895.9	893.25	3.1	1.3	28.6	0.381	28	175.45	29	2	0.381509	89.5571	0.118114	25	0.739395
4	7.95	125	890.6	895.9	893.25	3.1	1.3	28.6	0.381	28	175.45	29	2	0.381509	89.5571	0.118114	25	0.862234
5	7.95	125	890.6	895.9	893.25	3.1	1.3	28.6	0.381	28	175.45	29	2	0.381509	89.5571	0.118114	25	1.1398
6	7.95	125	890.6	895.9	893.25	3.1	1.3	28.6	0.381	28	175.45	29	2	0.381509	89.5571	0.118114	25	1.03586
7	7.95	125	890.6	895.9	893.25	3.1	1.3	28.6	0.381	28	175.45	29	2	0.381509	89.5571	0.118114	25	0.826799
8	7.95	125	890.6	895.9	893.25	3.1	1.3	28.6	0.381	28	175.45	29	2	0.381509	89.5571	0.118114	25	0.709866
9	7.95	125	890.6	895.9	893.25	3.1	1.3	28.6	0.381	28	175.45	29	2	0.381509	89.5571	0.118114	25	0.594114
10	7.95	125	890.6	895.9	893.25	3.1	1.3	28.6	0.381	28	175.45	29	2	0.381509	89.5571	0.118114	25	0.480725
11	7.95	125	890.6	895.9	893.25	3.1	1.3	28.6	0.381	28	175.45	29	2	0.381509	89.5571	0.118114	25	0.320089
12	7.95	125	890.6	895.9	893.25	3.1	1.3	28.6	0.381	28	175.45	29	2	0.381509	89.5571	0.118114	25	0.335444
1	7.95	125	906.3	913.5	909.9	7	4.6	31.3	0.578	46	176.12	29	2	2.04796	89.5571	0.634044	24.95	1.92749
2	7.95	125	906.3	913.5	909.9	7	4.6	31.3	0.578	46	176.12	29	2	2.04796	89.5571	0.634044	24.95	2.35864
3	7.95	125	906.3	913.5	909.9	7	4.6	31.3	0.578	46	176.12	29	2	2.04796	89.5571	0.634044	24.95	3.96912
4	7.95	125	906.3	913.5	909.9	7	4.6	31.3	0.578	46	176.12	29	2	2.04796	89.5571	0.634044	24.95	4.62852
5	7.95	125	906.3	913.5	909.9	7	4.6	31.3	0.578	46	176.12	29	2	2.04796	89.5571	0.634044	24.95	6.11852
6	7.95	125	906.3	913.5	909.9	7	4.6	31.3	0.578	46	176.12	29	2	2.04796	89.5571	0.634044	24.95	5.56057
7	7.95	125	906.3	913.5	909.9	7	4.6	31.3	0.578	46	176.12	29	2	2.04796	89.5571	0.634044	24.95	4.43831
8	7.95	125	906.3	913.5	909.9	7	4.6	31.3	0.578	46	176.12	29	2	2.04796	89.5571	0.634044	24.95	3.8106
9	7.95	125	906.3	913.5	909.9	7	4.6	31.3	0.578	46	176.12	29	2	2.04796	89.5571	0.634044	24.95	3.18924
10	7.95	125	906.3	913.5	909.9	7	4.6	31.3	0.578	46	176.12	29	2	2.04796	89.5571	0.634044	24.95	2.58056
11	7.95	125	906.3	913.5	909.9	7	4.6	31.3	0.578	46	176.12	29	2	2.04796	89.5571	0.634044	24.95	1.71826
12	7.95	125	906.3	913.5	909.9	7	4.6	31.3	0.578	46	176.12	29	2	2.04796	89.5571	0.634044	24.95	1.80068
1	7.95	125	848.7	855.4	852.05	5.1	2.4	29.3	0.39	30	221.76	37	2	0.289219	87.3042	0.123072	25.08	0.70028
2	7.95	125	848.7	855.4	852.05	5.1	2.4	29.3	0.39	30	221.76	37	2	0.289219	87.3042	0.123072	25.08	0.668281
3	7.95	125	848.7	855.4	852.05	5.1	2.4	29.3	0.39	30	221.76	37	2	0.289219	87.3042	0.123072	25.08	0.312603
4	7.95	125	848.7	855.4	852.05	5.1	2.4	29.3	0.39	30	221.76	37	2	0.289219	87.3042	0.123072	25.08	0.354448
5	7.95	125	848.7	855.4	852.05	5.1	2.4	29.3	0.39	30	221.76	37	2	0.289219	87.3042	0.123072	25.08	0.317526
6	7.95	125	848.7	855.4	852.05	5.1	2.4	29.3	0.39	30	221.76	37	2	0.289219	87.3042	0.123072	25.08	0.279374
7	7.95	125	848.7	855.4	852.05	5.1	2.4	29.3	0.39	30	221.76	37	2	0.289219	87.3042	0.123072	25.08	0.49598
8	7.95	125	848.7	855.4	852.05	5.1	2.4	29.3	0.39	30	221.76	37	2	0.289219	87.3042	0.123072	25.08	0.487365
9	7.95	125	848.7	855.4	852.05	5.1	2.4	29.3	0.39	30	221.76	37	2	0.289219	87.3042	0.123072	25.08	0.637513
10	7.95	125	848.7	855.4	852.05	5.1	2.4	29.3	0.39	30	221.76	37	2	0.289219	87.3042	0.123072	25.08	0.551363
11	7.95	125	848.7	855.4	852.05	5.1	2.4	29.3	0.39	30	221.76	37	2	0.289219	87.3042	0.123072	25.08	0.417214
12	7.95	125	848.7	855.4	852.05	5.1	2.4	29.3	0.39	30	221.76	37	2	0.289219	87.3042	0.123072	25.08	0.270759
1	7.95	125	896.2	901.4	898.8	3.1	2.2	30.3	0.434	28	166.06	17	2	1.79478	90.5747	0.4145	25	1.97302
2	7.95	125	896.2	901.4	898.8	3.1	2.2	30.3	0.434	28	166.06	17	2	1.79478	90.5747	0.4145	25	2.41653
3	7.95	125	896.2	901.4	898.8	3.1	2.2	30.3	0.434	28	166.06	17	2	1.79478	90.5747	0.4145	25	3.78438
4	7.95	125	896.2	901.4	898.8	3.1	2.2	30.3	0.434	28	166.06	17	2	1.79478	90.5747	0.4145	25	3.61444
5	7.95	125	896.2	901.4	898.8	3.1	2.2	30.3	0.434	28	166.06	17	2	1.79478	90.5747	0.4145	25	4.24448
6	7.95	125	896.2	901.4	898.8	3.1	2.2	30.3	0.434	28	166.06	17	2	1.79478	90.5747	0.4145	25	3.41548
7	7.95	125	896.2	901.4	898.8	3.1	2.2	30.3	0.434	28	166.06	17	2	1.79478	90.5747	0.4145	25	2.92222
8	7.95	125	896.2	901.4	898.8	3.1	2.2	30.3	0.434	28	166.06	17	2	1.79478	90.5747	0.4145	25	3.25797
9	7.95	125	896.2	901.4	898.8	3.1	2.2	30.3	0.434	28	166.06	17	2	1.79478	90.5747	0.4145	25	3.24553
10	7.95	125	896.2	901.4	898.8	3.1	2.2	30.3	0.434	28	166.06	17	2	1.79478	90.5747	0.4145	25	5.72839
11	7.95	125	896.2	901.4	898.8	3.1	2.2	30.3	0.434	28	166.06	17	2	1.79478	90.5747	0.4145	25	5.86103
12	7.95	125	896.2	901.4	898.8	3.1	2.2	30.3	0.434	28	166.06	17	2	1.79478	90.5747	0.4145	25	5.81543
1	7.95	125	913.2	918.7	915.95	4.1	2.2	29.6	0.246	27	144.77	27	2	1.01732	90.5747	0.234947	25	1.11835
2	7.95	125	913.2	918.7	915.95	4.1	2.2	29.6	0.246	27	144.77	27	2	1.01732	90.5747	0.234947	25	1.36974
3	7.95	125	913.2	918.7	915.95	4.1	2.2	29.6	0.246	27	144.77	27	2	1.01732	90.5747	0.234947	25	2.14506
4	7.95	125	913.2	918.7	915.95	4.1	2.2	29.6	0.246	27	144.77	27	2	1.01732	90.5747	0.234947	25	2.04874
5	7.95	125	913.2	918.7	915.95	4.1	2.2	29.6	0.246	27	144.77	27	2	1.01732	90.5747	0.234947	25	2.40586
6	7.95	125	913.2	918.7	915.95	4.1	2.2	29.6	0.246	27	144.77	27	2	1.01732	90.5747	0.234947	25	1.93596
7	7.95	125	913.2	918.7	915.95	4.1	2.2	29.6	0.246	27	144.77	27	2	1.01732	90.5747	0.234947	25	1.65638
8	7.95	125	913.2	918.7	915.95	4.1	2.2	29.6	0.246	27	144.77	27	2	1.01732	90.5747	0.234947	25	1.84668
9	7.95	125	913.2	918.7	915.95	4.1	2.2	29.6	0.246	27	144.77	27	2	1.01732	90.5747	0.234947	25	1.83963
10	7.95	125	913.2	918.7	915.95	4.1	2.2	29.6	0.246	27	144.77	27	2	1.01732	90.5747	0.234947	25	3.24697
11	7.95	125	913.2	918.7	915.95	4.1	2.2	29.6	0.246	27	144.77	27	2	1.01732	90.5747	0.234947	25	3.32215
12	7.95	125	913.2	918.7	915.95	4.1	2.2	29.6	0.246	27	144.77	27	2	1.01732	90.5747	0.234947	25	3.2963
1	7.95	125	920.2	923.3	921.75	2.1	1.9	29.1	0.425	28	181.37	27	2	1.5179	90.5747	0.350554	25	1.66863
2	7.95	125	920.2	923.3	921.75	2.1	1.9	29.1	0.425	28	181.37	27	2	1.5179	90.5747	0.350554	25	2.04373
3	7.95	125	920.2	923.3	921.75	2.1	1.9	29.1	0.425	28	181.37	27	2	1.5179	90.5747	0.350554	25	3.20055
4	7.95	125	920.2	923.3	921.75	2.1	1.9	29.1	0.425	28	181.37	27	2	1.5179	90.5747	0.350554	25	3.05683
5	7.95	125	920.2	923.3	921.75	2.1	1.9	29.1	0.425	28	181.37	27	2	1.5179	90.5747	0.350554	25	3.58967
6	7.95	125	920.2	923.3	921.75	2.1	1.9	29.1	0.425	28	181.37	27	2	1.5179	90.5747	0.350554	25	2.88856
7	7.95	125	920.2	923.3	921.75	2.1	1.9	29.1	0.425	28	181.37	27	2	1.5179	90.5747	0.350554	25	2.4714
8	7.95	125	920.2	923.3	921.75	2.1	1.9	29.1	0.425	28	181.37	27	2	1.5179	90.5747	0.350554	25	2.75535
9	7.95	125	920.2	923.3	921.75	2.1	1.9	29.1	0.425	28	181.37	27	2	1.5179	90.5747	0.350554	25	2.74483
10	7.95	125	920.2	923.3	921.75	2.1	1.9	29.1	0.425	28	181.37	27	2	1.5179	90.5747	0.350554	25	4.84465
11	7.95	125	920.2	923.3	921.75	2.1	1.9	29.1	0.425	28	181.37	27	2	1.5179	90.5747	0.350554	25	4.95683
12	7.95	125	920.2	923.3	921.75	2.1	1.9	29.1	0.425	28	181.37	27	2	1.5179	90.5747	0.350554	25	4.91827
1	11.27	125	1101.9	1106.8	1104.35	3.6	1	27.2	0.112	21	107.52	17	2	0.00175209	99.0268	0.0219011	25	0.0733687
2	11.27	125	1101.9	1106.8	1104.35	3.6	1	27.2	0.112	21	107.52	17	2	0.00175209	99.0268	0.0219011	25	0.0919846
3	11.27	125	1101.9	1106.8	1104.35	3.6	1	27.2	0.112	21	107.52	17	2	0.00175209	99.0268	0.0219011	25	0.0746827
4	11.27	125	1101.9	1106.8	1104.35	3.6	1	27.2	0.112	21	107.52	17	2	0.00175209	99.0268	0.0219011	25	0.07972
5	11.27	125	1101.9	1106.8	1104.35	3.6	1	27.2	0.112	21	107.52	17	2	0.00175209	99.0268	0.0219011	25	0.0512486
6	11.27	125	1101.9	1106.8	1104.35	3.6	1	27.2	0.112	21	107.52	17	2	0.00175209	99.0268	0.0219011	25	0.0470874
7	11.27	125	1101.9	1106.8	1104.35	3.6	1	27.2	0.112	21	107.52	17	2	0.00175209	99.0268	0.0219011	25	0.0372319
8	11.27	125	1101.9	1106.8	1104.35	3.6	1	27.2	0.112	21	107.52	17	2	0.00175209	99.0268	0.0219011	25	0.0260623
9	11.27	125	1101.9	1106.8	1104.35	3.6	1	27.2	0.112	21	107.52	17	2	0.00175209	99.0268	0.0219011	25	0.021025
10	11.27	125	1101.9	1106.8	1104.35	3.6	1	27.2	0.112	21	107.52	17	2	0.00175209	99.0268	0.0219011	25	0.0289094
11	11.27	125	1101.9	1106.8	1104.35	3.6	1	27.2	0.112	21	107.52	17	2	0.00175209	99.0268	0.0219011	25	0.0315376
12	11.27	125	1101.9	1106.8	1104.35	3.6	1	27.2	0.112	21	107.52	17	2	0.00175209	99.0268	0.0219011	25	0.0271574
1	9.97	175	935.9	943.1	939.5	6.7	4.3	31.7	0.719	30	228.65	37	2	0	0	0.694608	25.03	10.176
2	9.97	175	935.9	943.1	939.5	6.7	4.3	31.7	0.719	30	228.65	37	2	0	0	0.694608	25.03	9.96068
3	9.97	175	935.9	943.1	939.5	6.7	4.3	31.7	0.719	30	228.65	37	2	0	0	0.694608	25.03	8.82847
4	9.97	175	935.9	943.1	939.5	6.7	4.3	31.7	0.719	30	228.65	37	2	0	0	0.694608	25.03	6.71686
5	9.97	175	935.9	943.1	939.5	6.7	4.3	31.7	0.719	30	228.65	37	2	0	0	0.694608	25.03	5.54297
6	9.97	175	935.9	943.1	939.5	6.7	4.3	31.7	0.719	30	228.65	37	2	0	0	0.694608	25.03	4.97339
7	9.97	175	935.9	943.1	939.5	6.7	4.3	31.7	0.719	30	228.65	37	2	0	0	0.694608	25.03	5.3971
8	9.97	175	935.9	943.1	939.5	6.7	4.3	31.7	0.719	30	228.65	37	2	0	0	0.694608	25.03	4.84142
9	9.97	175	935.9	943.1	939.5	6.7	4.3	31.7	0.719	30	228.65	37	2	0	0	0.694608	25.03	3.80645
10	9.97	175	935.9	943.1	939.5	6.7	4.3	31.7	0.719	30	228.65	37	2	0	0	0.694608	25.03	3.78561
11	9.97	175	935.9	943.1	939.5	6.7	4.3	31.7	0.719	30	228.65	37	2	0	0	0.694608	25.03	4.42465
12	9.97	175	935.9	943.1	939.5	6.7	4.3	31.7	0.719	30	228.65	37	2	0	0	0.694608	25.03	4.15376
1	7.95	125	828.8	835.7	832.25	4.9	4.4	29.3	0.438	26	188.48	29	2	1.39819	86.767	0.54831	24.95	4.68257
2	7.95	125	828.8	835.7	832.25	4.9	4.4	29.3	0.438	26	188.48	29	2	1.39819	86.767	0.54831	24.95	2.32483
3	7.95	125	828.8	835.7	832.25	4.9	4.4	29.3	0.438	26	188.48	29	2	1.39819	86.767	0.54831	24.95	2.91153
4	7.95	125	828.8	835.7	832.25	4.9	4.4	29.3	0.438	26	188.48	29	2	1.39819	86.767	0.54831	24.95	2.68124
5	7.95	125	828.8	835.7	832.25	4.9	4.4	29.3	0.438	26	188.48	29	2	1.39819	86.767	0.54831	24.95	2.66479
6	7.95	125	828.8	835.7	832.25	4.9	4.4	29.3	0.438	26	188.48	29	2	1.39819	86.767	0.54831	24.95	2.88411
7	7.95	125	828.8	835.7	832.25	4.9	4.4	29.3	0.438	26	188.48	29	2	1.39819	86.767	0.54831	24.95	3.37211
8	7.95	125	828.8	835.7	832.25	4.9	4.4	29.3	0.438	26	188.48	29	2	1.39819	86.767	0.54831	24.95	2.31935
9	7.95	125	828.8	835.7	832.25	4.9	4.4	29.3	0.438	26	188.48	29	2	1.39819	86.767	0.54831	24.95	3.44339
10	7.95	125	828.8	835.7	832.25	4.9	4.4	29.3	0.438	26	188.48	29	2	1.39819	86.767	0.54831	24.95	3.33921
11	7.95	125	828.8	835.7	832.25	4.9	4.4	29.3	0.438	26	188.48	29	2	1.39819	86.767	0.54831	24.95	3.58046
12	7.95	125	828.8	835.7	832.25	4.9	4.4	29.3	0.438	26	188.48	29	2	1.39819	86.767	0.54831	24.95	4.84706
1	7.95	150	838.2	846.9	842.55	4.7	1.8	29.8	0.48	22	189.04	29	2	0.626835	86.767	0.245818	25.13	2.09928
2	7.95	150	838.2	846.9	842.55	4.7	1.8	29.8	0.48	22	189.04	29	2	0.626835	86.767	0.245818	25.13	1.04227
3	7.95	150	838.2	846.9	842.55	4.7	1.8	29.8	0.48	22	189.04	29	2	0.626835	86.767	0.245818	25.13	1.30529
4	7.95	150	838.2	846.9	842.55	4.7	1.8	29.8	0.48	22	189.04	29	2	0.626835	86.767	0.245818	25.13	1.20205
5	7.95	150	838.2	846.9	842.55	4.7	1.8	29.8	0.48	22	189.04	29	2	0.626835	86.767	0.245818	25.13	1.19467
6	7.95	150	838.2	846.9	842.55	4.7	1.8	29.8	0.48	22	189.04	29	2	0.626835	86.767	0.245818	25.13	1.293
7	7.95	150	838.2	846.9	842.55	4.7	1.8	29.8	0.48	22	189.04	29	2	0.626835	86.767	0.245818	25.13	1.51178
8	7.95	150	838.2	846.9	842.55	4.7	1.8	29.8	0.48	22	189.04	29	2	0.626835	86.767	0.245818	25.13	1.03981
9	7.95	150	838.2	846.9	842.55	4.7	1.8	29.8	0.48	22	189.04	29	2	0.626835	86.767	0.245818	25.13	1.54374
10	7.95	150	838.2	846.9	842.55	4.7	1.8	29.8	0.48	22	189.04	29	2	0.626835	86.767	0.245818	25.13	1.49703
11	7.95	150	838.2	846.9	842.55	4.7	1.8	29.8	0.48	22	189.04	29	2	0.626835	86.767	0.245818	25.13	1.60519
12	7.95	150	838.2	846.9	842.55	4.7	1.8	29.8	0.48	22	189.04	29	2	0.626835	86.767	0.245818	25.13	2.17303
1	7.95	125	871.5	879.5	875.5	6.8	4.3	28.3	0.452	32	133.94	23	2	3.15736	75.9133	0.81166	25	1.59897
2	7.95	125	871.5	879.5	875.5	6.8	4.3	28.3	0.452	32	133.94	23	2	3.15736	75.9133	0.81166	25	3.31969
3	7.95	125	871.5	879.5	875.5	6.8	4.3	28.3	0.452	32	133.94	23	2	3.15736	75.9133	0.81166	25	2.84081
4	7.95	125	871.5	879.5	875.5	6.8	4.3	28.3	0.452	32	133.94	23	2	3.15736	75.9133	0.81166	25	1.78565
5	7.95	125	871.5	879.5	875.5	6.8	4.3	28.3	0.452	32	133.94	23	2	3.15736	75.9133	0.81166	25	2.27265
6	7.95	125	871.5	879.5	875.5	6.8	4.3	28.3	0.452	32	133.94	23	2	3.15736	75.9133	0.81166	25	3.12489
7	7.95	125	871.5	879.5	875.5	6.8	4.3	28.3	0.452	32	133.94	23	2	3.15736	75.9133	0.81166	25	1.85058
8	7.95	125	871.5	879.5	875.5	6.8	4.3	28.3	0.452	32	133.94	23	2	3.15736	75.9133	0.81166	25	1.27431
9	7.95	125	871.5	879.5	875.5	6.8	4.3	28.3	0.452	32	133.94	23	2	3.15736	75.9133	0.81166	25	3.10866
10	7.95	125	871.5	879.5	875.5	6.8	4.3	28.3	0.452	32	133.94	23	2	3.15736	75.9133	0.81166	25	1.30677
11	7.95	125	871.5	879.5	875.5	6.8	4.3	28.3	0.452	32	133.94	23	2	3.15736	75.9133	0.81166	25	0.137982
1	7.95	125	892.9	894.9	893.9	1.8	0.6	25.7	0.085	31	147.39	27	2	0.0828489	75.9133	0.0212979	25	0.0419569
2	7.95	125	892.9	894.9	893.9	1.8	0.6	25.7	0.085	31	147.39	27	2	0.0828489	75.9133	0.0212979	25	0.0871085
3	7.95	125	892.9	894.9	893.9	1.8	0.6	25.7	0.085	31	147.39	27	2	0.0828489	75.9133	0.0212979	25	0.0745427
4	7.95	125	892.9	894.9	893.9	1.8	0.6	25.7	0.085	31	147.39	27	2	0.0828489	75.9133	0.0212979	25	0.0468554
5	7.95	125	892.9	894.9	893.9	1.8	0.6	25.7	0.085	31	147.39	27	2	0.0828489	75.9133	0.0212979	25	0.0596342
6	7.95	125	892.9	894.9	893.9	1.8	0.6	25.7	0.085	31	147.39	27	2	0.0828489	75.9133	0.0212979	25	0.081997
7	7.95	125	892.9	894.9	893.9	1.8	0.6	25.7	0.085	31	147.39	27	2	0.0828489	75.9133	0.0212979	25	0.0485593
8	7.95	125	892.9	894.9	893.9	1.8	0.6	25.7	0.085	31	147.39	27	2	0.0828489	75.9133	0.0212979	25	0.0334377
9	7.95	125	892.9	894.9	893.9	1.8	0.6	25.7	0.085	31	147.39	27	2	0.0828489	75.9133	0.0212979	25	0.081571
10	7.95	125	892.9	894.9	893.9	1.8	0.6	25.7	0.085	31	147.39	27	2	0.0828489	75.9133	0.0212979	25	0.0342897
11	7.95	125	892.9	894.9	893.9	1.8	0.6	25.7	0.085	31	147.39	27	2	0.0828489	75.9133	0.0212979	25	0.00362065
1	7.95	125	896.5	899.3	897.9	2.5	0.8	26.7	0.161	35	144.94	27	2	0.209234	75.9133	0.0537877	25	0.105962
2	7.95	125	896.5	899.3	897.9	2.5	0.8	26.7	0.161	35	144.94	27	2	0.209234	75.9133	0.0537877	25	0.219992
3	7.95	125	896.5	899.3	897.9	2.5	0.8	26.7	0.161	35	144.94	27	2	0.209234	75.9133	0.0537877	25	0.188257
4	7.95	125	896.5	899.3	897.9	2.5	0.8	26.7	0.161	35	144.94	27	2	0.209234	75.9133	0.0537877	25	0.118333
5	7.95	125	896.5	899.3	897.9	2.5	0.8	26.7	0.161	35	144.94	27	2	0.209234	75.9133	0.0537877	25	0.150606
6	7.95	125	896.5	899.3	897.9	2.5	0.8	26.7	0.161	35	144.94	27	2	0.209234	75.9133	0.0537877	25	0.207083
7	7.95	125	896.5	899.3	897.9	2.5	0.8	26.7	0.161	35	144.94	27	2	0.209234	75.9133	0.0537877	25	0.122636
8	7.95	125	896.5	899.3	897.9	2.5	0.8	26.7	0.161	35	144.94	27	2	0.209234	75.9133	0.0537877	25	0.0844467
9	7.95	125	896.5	899.3	897.9	2.5	0.8	26.7	0.161	35	144.94	27	2	0.209234	75.9133	0.0537877	25	0.206007
10	7.95	125	896.5	899.3	897.9	2.5	0.8	26.7	0.161	35	144.94	27	2	0.209234	75.9133	0.0537877	25	0.0865982
11	7.95	125	896.5	899.3	897.9	2.5	0.8	26.7	0.161	35	144.94	27	2	0.209234	75.9133	0.0537877	25	0.00914391
1	9.02	175	909.9	912.7	911.3	1.9	1.5	31.2	1.061	30	77.64	12	2	0.840735	93.4723	0.583844	25.51	4.63572
2	9.02	175	909.9	912.7	911.3	1.9	1.5	31.2	1.061	30	77.64	12	2	0.840735	93.4723	0.583844	25.51	5.02106
3	9.02	175	909.9	912.7	911.3	1.9	1.5	31.2	1.061	30	77.64	12	2	0.840735	93.4723	0.583844	25.51	3.77163
4	9.02	175	909.9	912.7	911.3	1.9	1.5	31.2	1.061	30	77.64	12	2	0.840735	93.4723	0.583844	25.51	4.192
5	9.02	175	909.9	912.7	911.3	1.9	1.5	31.2	1.061	30	77.64	12	2	0.840735	93.4723	0.583844	25.51	4.86342
6	9.02	175	909.9	912.7	911.3	1.9	1.5	31.2	1.061	30	77.64	12	2	0.840735	93.4723	0.583844	25.51	3.17611
7	9.02	175	909.9	912.7	911.3	1.9	1.5	31.2	1.061	30	77.64	12	2	0.840735	93.4723	0.583844	25.51	3.01263
8	9.02	175	909.9	912.7	911.3	1.9	1.5	31.2	1.061	30	77.64	12	2	0.840735	93.4723	0.583844	25.51	3.54393
9	9.02	175	909.9	912.7	911.3	1.9	1.5	31.2	1.061	30	77.64	12	2	0.840735	93.4723	0.583844	25.51	3.83585
10	9.02	175	909.9	912.7	911.3	1.9	1.5	31.2	1.061	30	77.64	12	2	0.840735	93.4723	0.583844	25.51	3.53809
11	9.02	175	909.9	912.7	911.3	1.9	1.5	31.2	1.061	30	77.64	12	2	0.840735	93.4723	0.583844	25.51	3.31039
1	7.95	125	866.7	870.3	868.5	2.8	0.9	27.7	0.381	32	177.36	29	2	0.169489	88.3832	0.0873653	25	0.451679
2	7.95	125	866.7	870.3	868.5	2.8	0.9	27.7	0.381	32	177.36	29	2	0.169489	88.3832	0.0873653	25	0.442068
3	7.95	125	866.7	870.3	868.5	2.8	0.9	27.7	0.381	32	177.36	29	2	0.169489	88.3832	0.0873653	25	0.318883
4	7.95	125	866.7	870.3	868.5	2.8	0.9	27.7	0.381	32	177.36	29	2	0.169489	88.3832	0.0873653	25	0.335483
5	7.95	125	866.7	870.3	868.5	2.8	0.9	27.7	0.381	32	177.36	29	2	0.169489	88.3832	0.0873653	25	0.209677
6	7.95	125	866.7	870.3	868.5	2.8	0.9	27.7	0.381	32	177.36	29	2	0.169489	88.3832	0.0873653	25	0.133669
7	7.95	125	866.7	870.3	868.5	2.8	0.9	27.7	0.381	32	177.36	29	2	0.169489	88.3832	0.0873653	25	0.0760078
8	7.95	125	866.7	870.3	868.5	2.8	0.9	27.7	0.381	32	177.36	29	2	0.169489	88.3832	0.0873653	25	0.0760078
9	7.95	125	866.7	870.3	868.5	2.8	0.9	27.7	0.381	32	177.36	29	2	0.169489	88.3832	0.0873653	25	0.0620294
1	7.95	125	874.8	879.7	877.25	3.6	1.7	30.3	0.499	34	177.36	29	2	0.419298	88.3832	0.216133	25	1.11741
2	7.95	125	874.8	879.7	877.25	3.6	1.7	30.3	0.499	34	177.36	29	2	0.419298	88.3832	0.216133	25	1.09363
3	7.95	125	874.8	879.7	877.25	3.6	1.7	30.3	0.499	34	177.36	29	2	0.419298	88.3832	0.216133	25	0.788885
4	7.95	125	874.8	879.7	877.25	3.6	1.7	30.3	0.499	34	177.36	29	2	0.419298	88.3832	0.216133	25	0.82995
5	7.95	125	874.8	879.7	877.25	3.6	1.7	30.3	0.499	34	177.36	29	2	0.419298	88.3832	0.216133	25	0.518719
6	7.95	125	874.8	879.7	877.25	3.6	1.7	30.3	0.499	34	177.36	29	2	0.419298	88.3832	0.216133	25	0.330683
7	7.95	125	874.8	879.7	877.25	3.6	1.7	30.3	0.499	34	177.36	29	2	0.419298	88.3832	0.216133	25	0.188036
8	7.95	125	874.8	879.7	877.25	3.6	1.7	30.3	0.499	34	177.36	29	2	0.419298	88.3832	0.216133	25	0.188036
9	7.95	125	874.8	879.7	877.25	3.6	1.7	30.3	0.499	34	177.36	29	2	0.419298	88.3832	0.216133	25	0.153454
1	7.95	125	888.5	892.3	890.4	2.5	2	29.7	0.521	25	177.36	29	2	0.51504	88.3832	0.265484	25	1.37255
2	7.95	125	888.5	892.3	890.4	2.5	2	29.7	0.521	25	177.36	29	2	0.51504	88.3832	0.265484	25	1.34335
3	7.95	125	888.5	892.3	890.4	2.5	2	29.7	0.521	25	177.36	29	2	0.51504	88.3832	0.265484	25	0.969018
4	7.95	125	888.5	892.3	890.4	2.5	2	29.7	0.521	25	177.36	29	2	0.51504	88.3832	0.265484	25	1.01946
5	7.95	125	888.5	892.3	890.4	2.5	2	29.7	0.521	25	177.36	29	2	0.51504	88.3832	0.265484	25	0.637163
6	7.95	125	888.5	892.3	890.4	2.5	2	29.7	0.521	25	177.36	29	2	0.51504	88.3832	0.265484	25	0.406191
7	7.95	125	888.5	892.3	890.4	2.5	2	29.7	0.521	25	177.36	29	2	0.51504	88.3832	0.265484	25	0.230971
8	7.95	125	888.5	892.3	890.4	2.5	2	29.7	0.521	25	177.36	29	2	0.51504	88.3832	0.265484	25	0.230971
9	7.95	125	888.5	892.3	890.4	2.5	2	29.7	0.521	25	177.36	29	2	0.51504	88.3832	0.265484	25	0.188494
1	10.94	175	891.1	896.4	893.75	4.7	2.5	26.3	0.32	23	176.04	29	2	0.326829	96.0588	0.487805	24.88	1.60976
2	10.94	175	891.1	896.4	893.75	4.7	2.5	26.3	0.32	23	176.04	29	2	0.326829	96.0588	0.487805	24.88	1
3	10.94	175	891.1	896.4	893.75	4.7	2.5	26.3	0.32	23	176.04	29	2	0.326829	96.0588	0.487805	24.88	1
4	10.94	175	891.1	896.4	893.75	4.7	2.5	26.3	0.32	23	176.04	29	2	0.326829	96.0588	0.487805	24.88	0.868293
5	10.94	175	891.1	896.4	893.75	4.7	2.5	26.3	0.32	23	176.04	29	2	0.326829	96.0588	0.487805	24.88	0.780488
6	10.94	175	891.1	896.4	893.75	4.7	2.5	26.3	0.32	23	176.04	29	2	0.326829	96.0588	0.487805	24.88	0.556098
7	10.94	175	891.1	896.4	893.75	4.7	2.5	26.3	0.32	23	176.04	29	2	0.326829	96.0588	0.487805	24.88	0.346341
8	10.94	175	891.1	896.4	893.75	4.7	2.5	26.3	0.32	23	176.04	29	2	0.326829	96.0588	0.487805	24.88	0.195122
9	10.94	175	891.1	896.4	893.75	4.7	2.5	26.3	0.32	23	176.04	29	2	0.326829	96.0588	0.487805	24.88	0.258537
1	9.05	175	890.2	897.4	893.8	6.7	5.8	30.5	0.51	28	146.44	23	2	1.23017	91.8487	0.305254	25	0.115996
2	9.05	175	890.2	897.4	893.8	6.7	5.8	30.5	0.51	28	146.44	23	2	1.23017	91.8487	0.305254	25	1.6789
3	9.05	175	890.2	897.4	893.8	6.7	5.8	30.5	0.51	28	146.44	23	2	1.23017	91.8487	0.305254	25	1.54764
4	9.05	175	890.2	897.4	893.8	6.7	5.8	30.5	0.51	28	146.44	23	2	1.23017	91.8487	0.305254	25	0.631875
5	9.05	175	890.2	897.4	893.8	6.7	5.8	30.5	0.51	28	146.44	23	2	1.23017	91.8487	0.305254	25	0.732609
1	9.05	175	902.2	911	906.6	7.3	4.2	30.1	0.672	32	160.72	29	2	1.17378	91.8487	0.29126	25	0.110679
2	9.05	175	902.2	911	906.6	7.3	4.2	30.1	0.672	32	160.72	29	2	1.17378	91.8487	0.29126	25	1.60193
3	9.05	175	902.2	911	906.6	7.3	4.2	30.1	0.672	32	160.72	29	2	1.17378	91.8487	0.29126	25	1.47669
4	9.05	175	902.2	911	906.6	7.3	4.2	30.1	0.672	32	160.72	29	2	1.17378	91.8487	0.29126	25	0.602909
5	9.05	175	902.2	911	906.6	7.3	4.2	30.1	0.672	32	160.72	29	2	1.17378	91.8487	0.29126	25	0.699025
1	8.29	125	864.8	867.5	866.15	1.6	0.4	29.6	0.432	32	216.13	37	2	0.212811	83.188	0.0613288	25.13	0.0343441
2	8.29	125	864.8	867.5	866.15	1.6	0.4	29.6	0.432	32	216.13	37	2	0.212811	83.188	0.0613288	25.13	0.237956
3	8.29	125	864.8	867.5	866.15	1.6	0.4	29.6	0.432	32	216.13	37	2	0.212811	83.188	0.0613288	25.13	0.167428
4	8.29	125	864.8	867.5	866.15	1.6	0.4	29.6	0.432	32	216.13	37	2	0.212811	83.188	0.0613288	25.13	0.328109
5	8.29	125	864.8	867.5	866.15	1.6	0.4	29.6	0.432	32	216.13	37	2	0.212811	83.188	0.0613288	25.13	0.514549
6	8.29	125	864.8	867.5	866.15	1.6	0.4	29.6	0.432	32	216.13	37	2	0.212811	83.188	0.0613288	25.13	0.125111
7	8.29	125	864.8	867.5	866.15	1.6	0.4	29.6	0.432	32	216.13	37	2	0.212811	83.188	0.0613288	25.13	0.166814
8	8.29	125	864.8	867.5	866.15	1.6	0.4	29.6	0.432	32	216.13	37	2	0.212811	83.188	0.0613288	25.13	0.211584
9	8.29	125	864.8	867.5	866.15	1.6	0.4	29.6	0.432	32	216.13	37	2	0.212811	83.188	0.0613288	25.13	0.195026
10	8.29	125	864.8	867.5	866.15	1.6	0.4	29.6	0.432	32	216.13	37	2	0.212811	83.188	0.0613288	25.13	0.282112
11	8.29	125	864.8	867.5	866.15	1.6	0.4	29.6	0.432	32	216.13	37	2	0.212811	83.188	0.0613288	25.13	0.080954
12	8.29	125	864.8	867.5	866.15	1.6	0.4	29.6	0.432	32	216.13	37	2	0.212811	83.188	0.0613288	25.13	0.040477
1	8.29	125	877.6	886.8	882.2	6.4	4.8	31.3	0.551	32	178.56	29	2	3.25719	83.188	0.938671	25	0.525656
2	8.29	125	877.6	886.8	882.2	6.4	4.8	31.3	0.551	32	178.56	29	2	3.25719	83.188	0.938671	25	3.64204
3	8.29	125	877.6	886.8	882.2	6.4	4.8	31.3	0.551	32	178.56	29	2	3.25719	83.188	0.938671	25	2.56257
4	8.29	125	877.6	886.8	882.2	6.4	4.8	31.3	0.551	32	178.56	29	2	3.25719	83.188	0.938671	25	5.02189
5	8.29	125	877.6	886.8	882.2	6.4	4.8	31.3	0.551	32	178.56	29	2	3.25719	83.188	0.938671	25	7.87545
6	8.29	125	877.6	886.8	882.2	6.4	4.8	31.3	0.551	32	178.56	29	2	3.25719	83.188	0.938671	25	1.91489
7	8.29	125	877.6	886.8	882.2	6.4	4.8	31.3	0.551	32	178.56	29	2	3.25719	83.188	0.938671	25	2.55319
8	8.29	125	877.6	886.8	882.2	6.4	4.8	31.3	0.551	32	178.56	29	2	3.25719	83.188	0.938671	25	3.23842
9	8.29	125	877.6	886.8	882.2	6.4	4.8	31.3	0.551	32	178.56	29	2	3.25719	83.188	0.938671	25	2.98497
10	8.29	125	877.6	886.8	882.2	6.4	4.8	31.3	0.551	32	178.56	29	2	3.25719	83.188	0.938671	25	4.31789
11	8.29	125	877.6	886.8	882.2	6.4	4.8	31.3	0.551	32	178.56	29	2	3.25719	83.188	0.938671	25	1.23905
12	8.29	125	877.6	886.8	882.2	6.4	4.8	31.3	0.551	32	178.56	29	2	3.25719	83.188	0.938671	25	0.619523
1	8.29	125	875.8	878.1	876.95	1.6	0.9	26.7	0.187	28	225.6	37	2	0.107108	90.2071	0.0266437	24.93	0.0471593
2	8.29	125	875.8	878.1	876.95	1.6	0.9	26.7	0.187	28	225.6	37	2	0.107108	90.2071	0.0266437	24.93	0.0743358
3	8.29	125	875.8	878.1	876.95	1.6	0.9	26.7	0.187	28	225.6	37	2	0.107108	90.2071	0.0266437	24.93	0.0999137
4	8.29	125	875.8	878.1	876.95	1.6	0.9	26.7	0.187	28	225.6	37	2	0.107108	90.2071	0.0266437	24.93	0.13162
5	8.29	125	875.8	878.1	876.95	1.6	0.9	26.7	0.187	28	225.6	37	2	0.107108	90.2071	0.0266437	24.93	0.0596818
6	8.29	125	875.8	878.1	876.95	1.6	0.9	26.7	0.187	28	225.6	37	2	0.107108	90.2071	0.0266437	24.93	0.0287752
7	8.29	125	875.8	878.1	876.95	1.6	0.9	26.7	0.187	28	225.6	37	2	0.107108	90.2071	0.0266437	24.93	0.0471593
8	8.29	125	875.8	878.1	876.95	1.6	0.9	26.7	0.187	28	225.6	37	2	0.107108	90.2071	0.0266437	24.93	0.0101246
9	8.29	125	875.8	878.1	876.95	1.6	0.9	26.7	0.187	28	225.6	37	2	0.107108	90.2071	0.0266437	24.93	0.0114568
1	8.8	175	933.6	943.7	938.65	8.1	5.4	30.2	1.2	33	176.24	29	2	0	0	0.805369	25	1.73154
2	8.8	175	933.6	943.7	938.65	8.1	5.4	30.2	1.2	33	176.24	29	2	0	0	0.805369	25	1.24027
3	8.8	175	933.6	943.7	938.65	8.1	5.4	30.2	1.2	33	176.24	29	2	0	0	0.805369	25	2.25503
4	8.8	175	933.6	943.7	938.65	8.1	5.4	30.2	1.2	33	176.24	29	2	0	0	0.805369	25	4.76779
5	8.8	175	933.6	943.7	938.65	8.1	5.4	30.2	1.2	33	176.24	29	2	0	0	0.805369	25	6.77315
6	8.8	175	933.6	943.7	938.65	8.1	5.4	30.2	1.2	33	176.24	29	2	0	0	0.805369	25	6.41074
7	8.8	175	933.6	943.7	938.65	8.1	5.4	30.2	1.2	33	176.24	29	2	0	0	0.805369	25	5.93557
8	8.8	175	933.6	943.7	938.65	8.1	5.4	30.2	1.2	33	176.24	29	2	0	0	0.805369	25	6.89396
9	8.8	175	933.6	943.7	938.65	8.1	5.4	30.2	1.2	33	176.24	29	2	0	0	0.805369	25	6.65235
10	8.8	175	933.6	943.7	938.65	8.1	5.4	30.2	1.2	33	176.24	29	2	0	0	0.805369	25	7.71544
11	8.8	175	933.6	943.7	938.65	8.1	5.4	30.2	1.2	33	176.24	29	2	0	0	0.805369	25	6.28993
12	8.8	175	933.6	943.7	938.65	8.1	5.4	30.2	1.2	33	176.24	29	2	0	0	0.805369	25	10.1074
1	9.02	175	876.7	886.8	881.75	8.7	5.6	31.5	1.152	19	222.04	37	2	4.30025	89.9128	0.68804	25.13	1.57561
2	9.02	175	876.7	886.8	881.75	8.7	5.6	31.5	1.152	19	222.04	37	2	4.30025	89.9128	0.68804	25.13	1.34168
3	9.02	175	876.7	886.8	881.75	8.7	5.6	31.5	1.152	19	222.04	37	2	4.30025	89.9128	0.68804	25.13	1.65818
4	9.02	175	876.7	886.8	881.75	8.7	5.6	31.5	1.152	19	222.04	37	2	4.30025	89.9128	0.68804	25.13	0.17889
1	9.02	175	893.5	900.5	897	5.9	2.5	31.5	1.17	48	222.6	37	2	1.94975	89.9128	0.31196	25.13	0.714389
2	9.02	175	893.5	900.5	897	5.9	2.5	31.5	1.17	48	222.6	37	2	1.94975	89.9128	0.31196	25.13	0.608322
3	9.02	175	893.5	900.5	897	5.9	2.5	31.5	1.17	48	222.6	37	2	1.94975	89.9128	0.31196	25.13	0.751824
4	9.02	175	893.5	900.5	897	5.9	2.5	31.5	1.17	48	222.6	37	2	1.94975	89.9128	0.31196	25.13	0.0811096
1	7.95	125	864.8	871.9	868.35	5.6	3.9	31.3	0.667	23	155.6	29	2	2.46109	89.3354	0.60618	30.05	4.75245
2	7.95	125	864.8	871.9	868.35	5.6	3.9	31.3	0.667	23	155.6	29	2	2.46109	89.3354	0.60618	30.05	4.53423
3	7.95	125	864.8	871.9	868.35	5.6	3.9	31.3	0.667	23	155.6	29	2	2.46109	89.3354	0.60618	30.05	3.14001
4	7.95	125	864.8	871.9	868.35	5.6	3.9	31.3	0.667	23	155.6	29	2	2.46109	89.3354	0.60618	30.05	4.67971
5	7.95	125	864.8	871.9	868.35	5.6	3.9	31.3	0.667	23	155.6	29	2	2.46109	89.3354	0.60618	30.05	4.66152
6	7.95	125	864.8	871.9	868.35	5.6	3.9	31.3	0.667	23	155.6	29	2	2.46109	89.3354	0.60618	30.05	2.63082
7	7.95	125	864.8	871.9	868.35	5.6	3.9	31.3	0.667	23	155.6	29	2	2.46109	89.3354	0.60618	30.05	2.27317
8	7.95	125	864.8	871.9	868.35	5.6	3.9	31.3	0.667	23	155.6	29	2	2.46109	89.3354	0.60618	30.05	3.59465
9	7.95	125	864.8	871.9	868.35	5.6	3.9	31.3	0.667	23	155.6	29	2	2.46109	89.3354	0.60618	30.05	1.01838
1	7.95	125	927.7	930	928.85	1.7	0.6	27.4	0.254	24	176.4	29	2	0.260375	91.008	0.0768068	24.88	0.445479
2	7.95	125	927.7	930	928.85	1.7	0.6	27.4	0.254	24	176.4	29	2	0.260375	91.008	0.0768068	24.88	1.01078
3	7.95	125	927.7	930	928.85	1.7	0.6	27.4	0.254	24	176.4	29	2	0.260375	91.008	0.0768068	24.88	0.823369
4	7.95	125	927.7	930	928.85	1.7	0.6	27.4	0.254	24	176.4	29	2	0.260375	91.008	0.0768068	24.88	0.713535
5	7.95	125	927.7	930	928.85	1.7	0.6	27.4	0.254	24	176.4	29	2	0.260375	91.008	0.0768068	24.88	0.755011
6	7.95	125	927.7	930	928.85	1.7	0.6	27.4	0.254	24	176.4	29	2	0.260375	91.008	0.0768068	24.88	0.798022
7	7.95	125	927.7	930	928.85	1.7	0.6	27.4	0.254	24	176.4	29	2	0.260375	91.008	0.0768068	24.88	0.832585
8	7.95	125	927.7	930	928.85	1.7	0.6	27.4	0.254	24	176.4	29	2	0.260375	91.008	0.0768068	24.88	0.622135
9	7.95	125	927.7	930	928.85	1.7	0.6	27.4	0.254	24	176.4	29	2	0.260375	91.008	0.0768068	24.88	0.95778
10	7.95	125	927.7	930	928.85	1.7	0.6	27.4	0.254	24	176.4	29	2	0.260375	91.008	0.0768068	24.88	1.00079
11	7.95	125	927.7	930	928.85	1.7	0.6	27.4	0.254	24	176.4	29	2	0.260375	91.008	0.0768068	24.88	1.00463
12	7.95	125	927.7	930	928.85	1.7	0.6	27.4	0.254	24	176.4	29	2	0.260375	91.008	0.0768068	24.88	0.915537
1	7.95	125	946.3	954	950.15	5.5	3.4	30.1	0.515	23	176.96	29	2	2.99158	91.008	0.882472	24.95	5.11833
2	7.95	125	946.3	954	950.15	5.5	3.4	30.1	0.515	23	176.96	29	2	2.99158	91.008	0.882472	24.95	11.6133
3	7.95	125	946.3	954	950.15	5.5	3.4	30.1	0.515	23	176.96	29	2	2.99158	91.008	0.882472	24.95	9.46009
4	7.95	125	946.3	954	950.15	5.5	3.4	30.1	0.515	23	176.96	29	2	2.99158	91.008	0.882472	24.95	8.19816
5	7.95	125	946.3	954	950.15	5.5	3.4	30.1	0.515	23	176.96	29	2	2.99158	91.008	0.882472	24.95	8.6747
6	7.95	125	946.3	954	950.15	5.5	3.4	30.1	0.515	23	176.96	29	2	2.99158	91.008	0.882472	24.95	9.16888
7	7.95	125	946.3	954	950.15	5.5	3.4	30.1	0.515	23	176.96	29	2	2.99158	91.008	0.882472	24.95	9.56599
8	7.95	125	946.3	954	950.15	5.5	3.4	30.1	0.515	23	176.96	29	2	2.99158	91.008	0.882472	24.95	7.14802
9	7.95	125	946.3	954	950.15	5.5	3.4	30.1	0.515	23	176.96	29	2	2.99158	91.008	0.882472	24.95	11.0044
10	7.95	125	946.3	954	950.15	5.5	3.4	30.1	0.515	23	176.96	29	2	2.99158	91.008	0.882472	24.95	11.4986
11	7.95	125	946.3	954	950.15	5.5	3.4	30.1	0.515	23	176.96	29	2	2.99158	91.008	0.882472	24.95	11.5427
12	7.95	125	946.3	954	950.15	5.5	3.4	30.1	0.515	23	176.96	29	2	2.99158	91.008	0.882472	24.95	10.5191
1	7.95	125	911.2	918.9	915.05	6.3	4.2	30.1	0.543	26	178.8	29	2	1.649	88.271	0.710777	24.88	0.732101
2	7.95	125	911.2	918.9	915.05	6.3	4.2	30.1	0.543	26	178.8	29	2	1.649	88.271	0.710777	24.88	2.17498
3	7.95	125	911.2	918.9	915.05	6.3	4.2	30.1	0.543	26	178.8	29	2	1.649	88.271	0.710777	24.88	1.42155
4	7.95	125	911.2	918.9	915.05	6.3	4.2	30.1	0.543	26	178.8	29	2	1.649	88.271	0.710777	24.88	6.41832
5	7.95	125	911.2	918.9	915.05	6.3	4.2	30.1	0.543	26	178.8	29	2	1.649	88.271	0.710777	24.88	6.38989
6	7.95	125	911.2	918.9	915.05	6.3	4.2	30.1	0.543	26	178.8	29	2	1.649	88.271	0.710777	24.88	4.55608
7	7.95	125	911.2	918.9	915.05	6.3	4.2	30.1	0.543	26	178.8	29	2	1.649	88.271	0.710777	24.88	3.6534
8	7.95	125	911.2	918.9	915.05	6.3	4.2	30.1	0.543	26	178.8	29	2	1.649	88.271	0.710777	24.88	2.62277
9	7.95	125	911.2	918.9	915.05	6.3	4.2	30.1	0.543	26	178.8	29	2	1.649	88.271	0.710777	24.88	2.16787
10	7.95	125	911.2	918.9	915.05	6.3	4.2	30.1	0.543	26	178.8	29	2	1.649	88.271	0.710777	24.88	2.18919
1	7.95	125	894.8	896.7	895.75	1.2	1	27.8	0.181	30	140.6	23	2	0.195584	84.0357	0.0496407	25.05	0.00297844
2	7.95	125	894.8	896.7	895.75	1.2	1	27.8	0.181	30	140.6	23	2	0.195584	84.0357	0.0496407	25.05	0.10772
3	7.95	125	894.8	896.7	895.75	1.2	1	27.8	0.181	30	140.6	23	2	0.195584	84.0357	0.0496407	25.05	0.0546048
4	7.95	125	894.8	896.7	895.75	1.2	1	27.8	0.181	30	140.6	23	2	0.195584	84.0357	0.0496407	25.05	0.0704898
5	7.95	125	894.8	896.7	895.75	1.2	1	27.8	0.181	30	140.6	23	2	0.195584	84.0357	0.0496407	25.05	0.0829
6	7.95	125	894.8	896.7	895.75	1.2	1	27.8	0.181	30	140.6	23	2	0.195584	84.0357	0.0496407	25.05	0.212462
7	7.95	125	894.8	896.7	895.75	1.2	1	27.8	0.181	30	140.6	23	2	0.195584	84.0357	0.0496407	25.05	0.198066
8	7.95	125	894.8	896.7	895.75	1.2	1	27.8	0.181	30	140.6	23	2	0.195584	84.0357	0.0496407	25.05	0.175728
9	7.95	125	894.8	896.7	895.75	1.2	1	27.8	0.181	30	140.6	23	2	0.195584	84.0357	0.0496407	25.05	0.244729
10	7.95	125	894.8	896.7	895.75	1.2	1	27.8	0.181	30	140.6	23	2	0.195584	84.0357	0.0496407	25.05	0.11467
1	7.95	125	911.9	917.1	914.5	4.1	2.6	30.6	0.567	27	165.34	27	2	1.59299	84.0357	0.404311	25.06	0.0242587
2	7.95	125	911.9	917.1	914.5	4.1	2.6	30.6	0.567	27	165.34	27	2	1.59299	84.0357	0.404311	25.06	0.877356
3	7.95	125	911.9	917.1	914.5	4.1	2.6	30.6	0.567	27	165.34	27	2	1.59299	84.0357	0.404311	25.06	0.444742
4	7.95	125	911.9	917.1	914.5	4.1	2.6	30.6	0.567	27	165.34	27	2	1.59299	84.0357	0.404311	25.06	0.574122
5	7.95	125	911.9	917.1	914.5	4.1	2.6	30.6	0.567	27	165.34	27	2	1.59299	84.0357	0.404311	25.06	0.6752
6	7.95	125	911.9	917.1	914.5	4.1	2.6	30.6	0.567	27	165.34	27	2	1.59299	84.0357	0.404311	25.06	1.73045
7	7.95	125	911.9	917.1	914.5	4.1	2.6	30.6	0.567	27	165.34	27	2	1.59299	84.0357	0.404311	25.06	1.6132
8	7.95	125	911.9	917.1	914.5	4.1	2.6	30.6	0.567	27	165.34	27	2	1.59299	84.0357	0.404311	25.06	1.43126
9	7.95	125	911.9	917.1	914.5	4.1	2.6	30.6	0.567	27	165.34	27	2	1.59299	84.0357	0.404311	25.06	1.99325
10	7.95	125	911.9	917.1	914.5	4.1	2.6	30.6	0.567	27	165.34	27	2	1.59299	84.0357	0.404311	25.06	0.933959
1	7.95	125	918.6	922.7	920.65	1.7	1	27.7	0.257	39	177.1	29	2	0.277708	84.0357	0.0704843	24.88	0.00422906
2	7.95	125	918.6	922.7	920.65	1.7	1	27.7	0.257	39	177.1	29	2	0.277708	84.0357	0.0704843	24.88	0.152951
3	7.95	125	918.6	922.7	920.65	1.7	1	27.7	0.257	39	177.1	29	2	0.277708	84.0357	0.0704843	24.88	0.0775328
4	7.95	125	918.6	922.7	920.65	1.7	1	27.7	0.257	39	177.1	29	2	0.277708	84.0357	0.0704843	24.88	0.100088
5	7.95	125	918.6	922.7	920.65	1.7	1	27.7	0.257	39	177.1	29	2	0.277708	84.0357	0.0704843	24.88	0.117709
6	7.95	125	918.6	922.7	920.65	1.7	1	27.7	0.257	39	177.1	29	2	0.277708	84.0357	0.0704843	24.88	0.301673
7	7.95	125	918.6	922.7	920.65	1.7	1	27.7	0.257	39	177.1	29	2	0.277708	84.0357	0.0704843	24.88	0.281233
8	7.95	125	918.6	922.7	920.65	1.7	1	27.7	0.257	39	177.1	29	2	0.277708	84.0357	0.0704843	24.88	0.249515
9	7.95	125	918.6	922.7	920.65	1.7	1	27.7	0.257	39	177.1	29	2	0.277708	84.0357	0.0704843	24.88	0.347488
10	7.95	125	918.6	922.7	920.65	1.7	1	27.7	0.257	39	177.1	29	2	0.277708	84.0357	0.0704843	24.88	0.162819
1	7.95	125	879	886.4	882.7	6	5.6	31.3	0.641	28	176.34	29	2	2.15316	87.5484	0.515111	24.88	3.9406
2	7.95	125	879	886.4	882.7	6	5.6	31.3	0.641	28	176.34	29	2	2.15316	87.5484	0.515111	24.88	1.77713
3	7.95	125	879	886.4	882.7	6	5.6	31.3	0.641	28	176.34	29	2	2.15316	87.5484	0.515111	24.88	0.731457
4	7.95	125	879	886.4	882.7	6	5.6	31.3	0.641	28	176.34	29	2	2.15316	87.5484	0.515111	24.88	0.566622
1	7.95	125	885	899	892	10.7	8.2	31.1	0.602	34	177.6	29	2	1.85067	84.1002	0.59507	24.88	2.21961
2	7.95	125	885	899	892	10.7	8.2	31.1	0.602	34	177.6	29	2	1.85067	84.1002	0.59507	24.88	1.13658
3	7.95	125	885	899	892	10.7	8.2	31.1	0.602	34	177.6	29	2	1.85067	84.1002	0.59507	24.88	1.54123
4	7.95	125	885	899	892	10.7	8.2	31.1	0.602	34	177.6	29	2	1.85067	84.1002	0.59507	24.88	2.98725
5	7.95	125	885	899	892	10.7	8.2	31.1	0.602	34	177.6	29	2	1.85067	84.1002	0.59507	24.88	2.69567
6	7.95	125	885	899	892	10.7	8.2	31.1	0.602	34	177.6	29	2	1.85067	84.1002	0.59507	24.88	0.862851
7	7.95	125	885	899	892	10.7	8.2	31.1	0.602	34	177.6	29	2	1.85067	84.1002	0.59507	24.88	0.392746
8	7.95	125	885	899	892	10.7	8.2	31.1	0.602	34	177.6	29	2	1.85067	84.1002	0.59507	24.88	1.10088
9	7.95	125	885	899	892	10.7	8.2	31.1	0.602	34	177.6	29	2	1.85067	84.1002	0.59507	24.88	1.16039
10	7.95	125	885	899	892	10.7	8.2	31.1	0.602	34	177.6	29	2	1.85067	84.1002	0.59507	24.88	1.14848
11	7.95	125	885	899	892	10.7	8.2	31.1	0.602	34	177.6	29	2	1.85067	84.1002	0.59507	24.88	0.844999
12	7.95	125	885	899	892	10.7	8.2	31.1	0.602	34	177.6	29	2	1.85067	84.1002	0.59507	24.88	0.232077
1	7.92	125	799.8	807	803.4	3.9	1.3	27.4	0.205	24	140.22	23	2	0	0	0.145406	25.21	0.593256
2	7.92	125	799.8	807	803.4	3.9	1.3	27.4	0.205	24	140.22	23	2	0	0	0.145406	25.21	0.404229
3	7.92	125	799.8	807	803.4	3.9	1.3	27.4	0.205	24	140.22	23	2	0	0	0.145406	25.21	0.458029
4	7.92	125	799.8	807	803.4	3.9	1.3	27.4	0.205	24	140.22	23	2	0	0	0.145406	25.21	0.782284
5	7.92	125	799.8	807	803.4	3.9	1.3	27.4	0.205	24	140.22	23	2	0	0	0.145406	25.21	0.709581
6	7.92	125	799.8	807	803.4	3.9	1.3	27.4	0.205	24	140.22	23	2	0	0	0.145406	25.21	0.87389
7	7.92	125	799.8	807	803.4	3.9	1.3	27.4	0.205	24	140.22	23	2	0	0	0.145406	25.21	0.728484
8	7.92	125	799.8	807	803.4	3.9	1.3	27.4	0.205	24	140.22	23	2	0	0	0.145406	25.21	0.452212
9	7.92	125	799.8	807	803.4	3.9	1.3	27.4	0.205	24	140.22	23	2	0	0	0.145406	25.21	0.405683
10	7.92	125	799.8	807	803.4	3.9	1.3	27.4	0.205	24	140.22	23	2	0	0	0.145406	25.21	0.346066
11	7.92	125	799.8	807	803.4	3.9	1.3	27.4	0.205	24	140.22	23	2	0	0	0.145406	25.21	0.334434
12	7.92	125	799.8	807	803.4	3.9	1.3	27.4	0.205	24	140.22	23	2	0	0	0.145406	25.21	0.392596
1	8.67	175	886.4	888.9	887.65	2.1	0.3	26.3	0.107	33	176.06	29	2	0.0274815	82.1573	0.00692228	24.95	0.0788448
2	8.67	175	886.4	888.9	887.65	2.1	0.3	26.3	0.107	33	176.06	29	2	0.0274815	82.1573	0.00692228	24.95	0.0803677
3	8.67	175	886.4	888.9	887.65	2.1	0.3	26.3	0.107	33	176.06	29	2	0.0274815	82.1573	0.00692228	24.95	0.0520556
4	8.67	175	886.4	888.9	887.65	2.1	0.3	26.3	0.107	33	176.06	29	2	0.0274815	82.1573	0.00692228	24.95	0.0732377
5	8.67	175	886.4	888.9	887.65	2.1	0.3	26.3	0.107	33	176.06	29	2	0.0274815	82.1573	0.00692228	24.95	0.0475561
6	8.67	175	886.4	888.9	887.65	2.1	0.3	26.3	0.107	33	176.06	29	2	0.0274815	82.1573	0.00692228	24.95	0.0431258
7	8.67	175	886.4	888.9	887.65	2.1	0.3	26.3	0.107	33	176.06	29	2	0.0274815	82.1573	0.00692228	24.95	0.0385571
8	8.67	175	886.4	888.9	887.65	2.1	0.3	26.3	0.107	33	176.06	29	2	0.0274815	82.1573	0.00692228	24.95	0.0349575
9	8.67	175	886.4	888.9	887.65	2.1	0.3	26.3	0.107	33	176.06	29	2	0.0274815	82.1573	0.00692228	24.95	0.0149521
10	8.67	175	886.4	888.9	887.65	2.1	0.3	26.3	0.107	33	176.06	29	2	0.0274815	82.1573	0.00692228	24.95	0.0210437
11	8.67	175	886.4	888.9	887.65	2.1	0.3	26.3	0.107	33	176.06	29	2	0.0274815	82.1573	0.00692228	24.95	0.0139138
12	8.67	175	886.4	888.9	887.65	2.1	0.3	26.3	0.107	33	176.06	29	2	0.0274815	82.1573	0.00692228	24.95	0.0240203
1	8.67	125	898.1	903.6	900.85	4.2	2.5	30.1	0.893	31	141.26	23	2	1.91129	82.1573	0.481433	25.05	5.48352
2	8.67	125	898.1	903.6	900.85	4.2	2.5	30.1	0.893	31	141.26	23	2	1.91129	82.1573	0.481433	25.05	5.58943
3	8.67	125	898.1	903.6	900.85	4.2	2.5	30.1	0.893	31	141.26	23	2	1.91129	82.1573	0.481433	25.05	3.62037
4	8.67	125	898.1	903.6	900.85	4.2	2.5	30.1	0.893	31	141.26	23	2	1.91129	82.1573	0.481433	25.05	5.09356
5	8.67	125	898.1	903.6	900.85	4.2	2.5	30.1	0.893	31	141.26	23	2	1.91129	82.1573	0.481433	25.05	3.30744
6	8.67	125	898.1	903.6	900.85	4.2	2.5	30.1	0.893	31	141.26	23	2	1.91129	82.1573	0.481433	25.05	2.99933
7	8.67	125	898.1	903.6	900.85	4.2	2.5	30.1	0.893	31	141.26	23	2	1.91129	82.1573	0.481433	25.05	2.68158
8	8.67	125	898.1	903.6	900.85	4.2	2.5	30.1	0.893	31	141.26	23	2	1.91129	82.1573	0.481433	25.05	2.43124
9	8.67	125	898.1	903.6	900.85	4.2	2.5	30.1	0.893	31	141.26	23	2	1.91129	82.1573	0.481433	25.05	1.03989
10	8.67	125	898.1	903.6	900.85	4.2	2.5	30.1	0.893	31	141.26	23	2	1.91129	82.1573	0.481433	25.05	1.46356
11	8.67	125	898.1	903.6	900.85	4.2	2.5	30.1	0.893	31	141.26	23	2	1.91129	82.1573	0.481433	25.05	0.96768
12	8.67	125	898.1	903.6	900.85	4.2	2.5	30.1	0.893	31	141.26	23	2	1.91129	82.1573	0.481433	25.05	1.67057
1	10.18	125	1098.9	1104.8	1101.85	5	2	30.6	0.331	35	110.8	17	2	0.0696842	95.0753	0.0575903	24.9	0.0558625
2	10.18	125	1098.9	1104.8	1101.85	5	2	30.6	0.331	35	110.8	17	2	0.0696842	95.0753	0.0575903	24.9	0.0938721
3	10.18	125	1098.9	1104.8	1101.85	5	2	30.6	0.331	35	110.8	17	2	0.0696842	95.0753	0.0575903	24.9	0.202718
4	10.18	125	1098.9	1104.8	1101.85	5	2	30.6	0.331	35	110.8	17	2	0.0696842	95.0753	0.0575903	24.9	0.151462
5	10.18	125	1098.9	1104.8	1101.85	5	2	30.6	0.331	35	110.8	17	2	0.0696842	95.0753	0.0575903	24.9	0.112877
6	10.18	125	1098.9	1104.8	1101.85	5	2	30.6	0.331	35	110.8	17	2	0.0696842	95.0753	0.0575903	24.9	0.0806264
7	10.18	125	1098.9	1104.8	1101.85	5	2	30.6	0.331	35	110.8	17	2	0.0696842	95.0753	0.0575903	24.9	0.103087
8	10.18	125	1098.9	1104.8	1101.85	5	2	30.6	0.331	35	110.8	17	2	0.0696842	95.0753	0.0575903	24.9	0.00575903
1	10.18	125	1118.7	1127.6	1123.15	7.8	3.7	30.4	0.58	32	111.36	17	2	0.225895	95.0753	0.18669	24.9	0.181089
2	10.18	125	1118.7	1127.6	1123.15	7.8	3.7	30.4	0.58	32	111.36	17	2	0.225895	95.0753	0.18669	24.9	0.304304
3	10.18	125	1118.7	1127.6	1123.15	7.8	3.7	30.4	0.58	32	111.36	17	2	0.225895	95.0753	0.18669	24.9	0.657148
4	10.18	125	1118.7	1127.6	1123.15	7.8	3.7	30.4	0.58	32	111.36	17	2	0.225895	95.0753	0.18669	24.9	0.490994
5	10.18	125	1118.7	1127.6	1123.15	7.8	3.7	30.4	0.58	32	111.36	17	2	0.225895	95.0753	0.18669	24.9	0.365912
6	10.18	125	1118.7	1127.6	1123.15	7.8	3.7	30.4	0.58	32	111.36	17	2	0.225895	95.0753	0.18669	24.9	0.261366
7	10.18	125	1118.7	1127.6	1123.15	7.8	3.7	30.4	0.58	32	111.36	17	2	0.225895	95.0753	0.18669	24.9	0.334175
8	10.18	125	1118.7	1127.6	1123.15	7.8	3.7	30.4	0.58	32	111.36	17	2	0.225895	95.0753	0.18669	24.9	0.018669
1	10.18	125	1173.1	1184.9	1179	10.7	8.7	30.6	0.894	33	111.36	17	2	0.818716	95.0753	0.676625	24.9	0.656326
2	10.18	125	1173.1	1184.9	1179	10.7	8.7	30.6	0.894	33	111.36	17	2	0.818716	95.0753	0.676625	24.9	1.1029
3	10.18	125	1173.1	1184.9	1179	10.7	8.7	30.6	0.894	33	111.36	17	2	0.818716	95.0753	0.676625	24.9	2.38172
4	10.18	125	1173.1	1184.9	1179	10.7	8.7	30.6	0.894	33	111.36	17	2	0.818716	95.0753	0.676625	24.9	1.77952
5	10.18	125	1173.1	1184.9	1179	10.7	8.7	30.6	0.894	33	111.36	17	2	0.818716	95.0753	0.676625	24.9	1.32618
6	10.18	125	1173.1	1184.9	1179	10.7	8.7	30.6	0.894	33	111.36	17	2	0.818716	95.0753	0.676625	24.9	0.947274
7	10.18	125	1173.1	1184.9	1179	10.7	8.7	30.6	0.894	33	111.36	17	2	0.818716	95.0753	0.676625	24.9	1.21116
8	10.18	125	1173.1	1184.9	1179	10.7	8.7	30.6	0.894	33	111.36	17	2	0.818716	95.0753	0.676625	24.9	0.0676625
1	10.45	175	1053.1	1055.8	1054.45	1.5	0.7	27.6	0.241	21	177.18	29	2	1.03	97.092	1	25.13	2.15
2	10.45	175	1053.1	1055.8	1054.45	1.5	0.7	27.6	0.241	21	177.18	29	2	1.03	97.092	1	25.13	2.42
3	10.45	175	1053.1	1055.8	1054.45	1.5	0.7	27.6	0.241	21	177.18	29	2	1.03	97.092	1	25.13	2.19
4	10.45	175	1053.1	1055.8	1054.45	1.5	0.7	27.6	0.241	21	177.18	29	2	1.03	97.092	1	25.13	0.98
5	10.45	175	1053.1	1055.8	1054.45	1.5	0.7	27.6	0.241	21	177.18	29	2	1.03	97.092	1	25.13	0.91
6	10.45	175	1053.1	1055.8	1054.45	1.5	0.7	27.6	0.241	21	177.18	29	2	1.03	97.092	1	25.13	0.76
7	10.45	175	1053.1	1055.8	1054.45	1.5	0.7	27.6	0.241	21	177.18	29	2	1.03	97.092	1	25.13	1.54
8	10.45	175	1053.1	1055.8	1054.45	1.5	0.7	27.6	0.241	21	177.18	29	2	1.03	97.092	1	25.13	0.3
10	10.45	175	1053.1	1055.8	1054.45	1.5	0.7	27.6	0.241	21	177.18	29	2	1.03	97.092	1	25.13	0.44
11	10.45	175	1053.1	1055.8	1054.45	1.5	0.7	27.6	0.241	21	177.18	29	2	1.03	97.092	1	25.13	0.28
2	7.37	175	896.9	912.6	904.75	11.3	6.5	29.3	0.403	27	225.88	37	2	3.22682	93.4316	0.91671	25.03	1.89759
3	7.37	175	896.9	912.6	904.75	11.3	6.5	29.3	0.403	27	225.88	37	2	3.22682	93.4316	0.91671	25.03	1.29256
4	7.37	175	896.9	912.6	904.75	11.3	6.5	29.3	0.403	27	225.88	37	2	3.22682	93.4316	0.91671	25.03	1.78759
5	7.37	175	896.9	912.6	904.75	11.3	6.5	29.3	0.403	27	225.88	37	2	3.22682	93.4316	0.91671	25.03	1.14589
6	7.37	175	896.9	912.6	904.75	11.3	6.5	29.3	0.403	27	225.88	37	2	3.22682	93.4316	0.91671	25.03	1.67758
7	7.37	175	896.9	912.6	904.75	11.3	6.5	29.3	0.403	27	225.88	37	2	3.22682	93.4316	0.91671	25.03	1.62258
8	7.37	175	896.9	912.6	904.75	11.3	6.5	29.3	0.403	27	225.88	37	2	3.22682	93.4316	0.91671	25.03	2.66763
9	7.37	175	896.9	912.6	904.75	11.3	6.5	29.3	0.403	27	225.88	37	2	3.22682	93.4316	0.91671	25.03	1.89759
10	7.37	175	896.9	912.6	904.75	11.3	6.5	29.3	0.403	27	225.88	37	2	3.22682	93.4316	0.91671	25.03	0.687533
11	7.37	175	896.9	912.6	904.75	11.3	6.5	29.3	0.403	27	225.88	37	2	3.22682	93.4316	0.91671	25.03	1.3384
1	7.95	125	847.3	854.4	850.85	6.8	4.3	31.3	0.373	27	155.88	23	2	2.1557	89.0529	0.415357	19.79	0.560732
2	7.95	125	847.3	854.4	850.85	6.8	4.3	31.3	0.373	27	155.88	23	2	2.1557	89.0529	0.415357	19.79	0.344746
3	7.95	125	847.3	854.4	850.85	6.8	4.3	31.3	0.373	27	155.88	23	2	2.1557	89.0529	0.415357	19.79	0.195218
1	7.95	125	860.6	870	865.3	5.4	1.8	27.7	0.129	26	142.5	23	2	0.312085	89.0529	0.0601321	25.05	0.0811783
2	7.95	125	860.6	870	865.3	5.4	1.8	27.7	0.129	26	142.5	23	2	0.312085	89.0529	0.0601321	25.05	0.0499096
3	7.95	125	860.6	870	865.3	5.4	1.8	27.7	0.129	26	142.5	23	2	0.312085	89.0529	0.0601321	25.05	0.0282621
1	11.27	125	1060.1	1066.5	1063.3	3.7	0.3	27.6	0.187	30	227.2	37	2	0.00830803	98.6628	0.0296716	24.93	0.0109785
2	11.27	125	1060.1	1066.5	1063.3	3.7	0.3	27.6	0.187	30	227.2	37	2	0.00830803	98.6628	0.0296716	24.93	0.0329354
3	11.27	125	1060.1	1066.5	1063.3	3.7	0.3	27.6	0.187	30	227.2	37	2	0.00830803	98.6628	0.0296716	24.93	0.0317486
4	11.27	125	1060.1	1066.5	1063.3	3.7	0.3	27.6	0.187	30	227.2	37	2	0.00830803	98.6628	0.0296716	24.93	0.0198799
5	11.27	125	1060.1	1066.5	1063.3	3.7	0.3	27.6	0.187	30	227.2	37	2	0.00830803	98.6628	0.0296716	24.93	0.0293748
6	11.27	125	1060.1	1066.5	1063.3	3.7	0.3	27.6	0.187	30	227.2	37	2	0.00830803	98.6628	0.0296716	24.93	0.0311551
7	11.27	125	1060.1	1066.5	1063.3	3.7	0.3	27.6	0.187	30	227.2	37	2	0.00830803	98.6628	0.0296716	24.93	0.0115719
8	11.27	125	1060.1	1066.5	1063.3	3.7	0.3	27.6	0.187	30	227.2	37	2	0.00830803	98.6628	0.0296716	24.93	0.0163194
9	11.27	125	1060.1	1066.5	1063.3	3.7	0.3	27.6	0.187	30	227.2	37	2	0.00830803	98.6628	0.0296716	24.93	0.00534088
10	11.27	125	1060.1	1066.5	1063.3	3.7	0.3	27.6	0.187	30	227.2	37	2	0.00830803	98.6628	0.0296716	24.93	0.00237372
11	11.27	125	1060.1	1066.5	1063.3	3.7	0.3	27.6	0.187	30	227.2	37	2	0.00830803	98.6628	0.0296716	24.93	0.00296716
1	8.02	125	897.5	902.9	900.2	2.7	1.5	26.7	0.144	29	179.1	29	2	0	0	0.0425784	24.88	0.143489
2	8.02	125	897.5	902.9	900.2	2.7	1.5	26.7	0.144	29	179.1	29	2	0	0	0.0425784	24.88	0.150727
3	8.02	125	897.5	902.9	900.2	2.7	1.5	26.7	0.144	29	179.1	29	2	0	0	0.0425784	24.88	0.127735
4	8.02	125	897.5	902.9	900.2	2.7	1.5	26.7	0.144	29	179.1	29	2	0	0	0.0425784	24.88	0.1767
5	8.02	125	897.5	902.9	900.2	2.7	1.5	26.7	0.144	29	179.1	29	2	0	0	0.0425784	24.88	0.154559
6	8.02	125	897.5	902.9	900.2	2.7	1.5	26.7	0.144	29	179.1	29	2	0	0	0.0425784	24.88	0.127735
7	8.02	125	897.5	902.9	900.2	2.7	1.5	26.7	0.144	29	179.1	29	2	0	0	0.0425784	24.88	0.14647
8	8.02	125	897.5	902.9	900.2	2.7	1.5	26.7	0.144	29	179.1	29	2	0	0	0.0425784	24.88	0.156263
9	8.02	125	897.5	902.9	900.2	2.7	1.5	26.7	0.144	29	179.1	29	2	0	0	0.0425784	24.88	0.179681
1	8.02	125	913.5	923.3	918.4	5.4	4.6	31.3	0.659	30	178.65	29	2	0	0	0.597556	24.88	2.01376
2	8.02	125	913.5	923.3	918.4	5.4	4.6	31.3	0.659	30	178.65	29	2	0	0	0.597556	24.88	2.11535
3	8.02	125	913.5	923.3	918.4	5.4	4.6	31.3	0.659	30	178.65	29	2	0	0	0.597556	24.88	1.79267
4	8.02	125	913.5	923.3	918.4	5.4	4.6	31.3	0.659	30	178.65	29	2	0	0	0.597556	24.88	2.47986
5	8.02	125	913.5	923.3	918.4	5.4	4.6	31.3	0.659	30	178.65	29	2	0	0	0.597556	24.88	2.16913
6	8.02	125	913.5	923.3	918.4	5.4	4.6	31.3	0.659	30	178.65	29	2	0	0	0.597556	24.88	1.79267
7	8.02	125	913.5	923.3	918.4	5.4	4.6	31.3	0.659	30	178.65	29	2	0	0	0.597556	24.88	2.05559
8	8.02	125	913.5	923.3	918.4	5.4	4.6	31.3	0.659	30	178.65	29	2	0	0	0.597556	24.88	2.19303
9	8.02	125	913.5	923.3	918.4	5.4	4.6	31.3	0.659	30	178.65	29	2	0	0	0.597556	24.88	2.52168
1	10.94	175	905.4	911.2	908.3	3.6	2.1	28.3	0.413	25	226.1	37	2	0	0	0.1411	25.13	1.4872
2	10.94	175	905.4	911.2	908.3	3.6	2.1	28.3	0.413	25	226.1	37	2	0	0	0.1411	25.13	1.25438
3	10.94	175	905.4	911.2	908.3	3.6	2.1	28.3	0.413	25	226.1	37	2	0	0	0.1411	25.13	1.43781
4	10.94	175	905.4	911.2	908.3	3.6	2.1	28.3	0.413	25	226.1	37	2	0	0	0.1411	25.13	1.67063
5	10.94	175	905.4	911.2	908.3	3.6	2.1	28.3	0.413	25	226.1	37	2	0	0	0.1411	25.13	1.4237
6	10.94	175	905.4	911.2	908.3	3.6	2.1	28.3	0.413	25	226.1	37	2	0	0	0.1411	25.13	1.41947
7	10.94	175	905.4	911.2	908.3	3.6	2.1	28.3	0.413	25	226.1	37	2	0	0	0.1411	25.13	1.4237
8	10.94	175	905.4	911.2	908.3	3.6	2.1	28.3	0.413	25	226.1	37	2	0	0	0.1411	25.13	1.71719
9	10.94	175	905.4	911.2	908.3	3.6	2.1	28.3	0.413	25	226.1	37	2	0	0	0.1411	25.13	1.52529
10	10.94	175	905.4	911.2	908.3	3.6	2.1	28.3	0.413	25	226.1	37	2	0	0	0.1411	25.13	1.22616
11	10.94	175	905.4	911.2	908.3	3.6	2.1	28.3	0.413	25	226.1	37	2	0	0	0.1411	25.13	1.24309
12	10.94	175	905.4	911.2	908.3	3.6	2.1	28.3	0.413	25	226.1	37	2	0	0	0.1411	25.13	1.28683
1	8.02	125	963.6	970.6	967.1	5.3	3.2	30.7	0.541	29	180.46	29	2	0	0	0.459216	24.88	3.84364
2	8.02	125	963.6	970.6	967.1	5.3	3.2	30.7	0.541	29	180.46	29	2	0	0	0.459216	24.88	3.61403
3	8.02	125	963.6	970.6	967.1	5.3	3.2	30.7	0.541	29	180.46	29	2	0	0	0.459216	24.88	3.44412
4	8.02	125	963.6	970.6	967.1	5.3	3.2	30.7	0.541	29	180.46	29	2	0	0	0.459216	24.88	2.815
5	8.02	125	963.6	970.6	967.1	5.3	3.2	30.7	0.541	29	180.46	29	2	0	0	0.459216	24.88	3.19615
6	8.02	125	963.6	970.6	967.1	5.3	3.2	30.7	0.541	29	180.46	29	2	0	0	0.459216	24.88	2.76448
7	8.02	125	963.6	970.6	967.1	5.3	3.2	30.7	0.541	29	180.46	29	2	0	0	0.459216	24.88	2.35119
8	8.02	125	963.6	970.6	967.1	5.3	3.2	30.7	0.541	29	180.46	29	2	0	0	0.459216	24.88	2.06188
9	8.02	125	963.6	970.6	967.1	5.3	3.2	30.7	0.541	29	180.46	29	2	0	0	0.459216	24.88	2.82877
10	8.02	125	963.6	970.6	967.1	5.3	3.2	30.7	0.541	29	180.46	29	2	0	0	0.459216	24.88	2.08943
11	8.02	125	963.6	970.6	967.1	5.3	3.2	30.7	0.541	29	180.46	29	2	0	0	0.459216	24.88	2.20883
12	8.02	125	963.6	970.6	967.1	5.3	3.2	30.7	0.541	29	180.46	29	2	0	0	0.459216	24.88	2.31904
1	7.95	125	882.9	887	884.95	2.5	0.7	29.6	0.422	35	140.12	23	2	0.0423651	97.6707	0.0481421	25.05	0.130465
2	7.95	125	882.9	887	884.95	2.5	0.7	29.6	0.422	35	140.12	23	2	0.0423651	97.6707	0.0481421	25.05	0.116985
3	7.95	125	882.9	887	884.95	2.5	0.7	29.6	0.422	35	140.12	23	2	0.0423651	97.6707	0.0481421	25.05	0.164165
4	7.95	125	882.9	887	884.95	2.5	0.7	29.6	0.422	35	140.12	23	2	0.0423651	97.6707	0.0481421	25.05	0.408245
5	7.95	125	882.9	887	884.95	2.5	0.7	29.6	0.422	35	140.12	23	2	0.0423651	97.6707	0.0481421	25.05	0.573373
6	7.95	125	882.9	887	884.95	2.5	0.7	29.6	0.422	35	140.12	23	2	0.0423651	97.6707	0.0481421	25.05	0.649437
7	7.95	125	882.9	887	884.95	2.5	0.7	29.6	0.422	35	140.12	23	2	0.0423651	97.6707	0.0481421	25.05	0.647993
8	7.95	125	882.9	887	884.95	2.5	0.7	29.6	0.422	35	140.12	23	2	0.0423651	97.6707	0.0481421	25.05	0.527156
9	7.95	125	882.9	887	884.95	2.5	0.7	29.6	0.422	35	140.12	23	2	0.0423651	97.6707	0.0481421	25.05	0.512713
10	7.95	125	882.9	887	884.95	2.5	0.7	29.6	0.422	35	140.12	23	2	0.0423651	97.6707	0.0481421	25.05	0.463127
11	7.95	125	882.9	887	884.95	2.5	0.7	29.6	0.422	35	140.12	23	2	0.0423651	97.6707	0.0481421	25.05	0.393321
12	7.95	125	882.9	887	884.95	2.5	0.7	29.6	0.422	35	140.12	23	2	0.0423651	97.6707	0.0481421	25.05	0.343735
1	10.1	125	1039.8	1044.9	1042.35	3.4	3	30.9	0.532	30	184.16	29	2	0.0157778	99.3528	0.788888	25.13	1.136
2	10.1	125	1039.8	1044.9	1042.35	3.4	3	30.9	0.532	30	184.16	29	2	0.0157778	99.3528	0.788888	25.13	0.670555
3	10.1	125	1039.8	1044.9	1042.35	3.4	3	30.9	0.532	30	184.16	29	2	0.0157778	99.3528	0.788888	25.13	0.260333
4	10.1	125	1039.8	1044.9	1042.35	3.4	3	30.9	0.532	30	184.16	29	2	0.0157778	99.3528	0.788888	25.13	0.378666
1	10.1	125	1046.2	1047.9	1047.05	1.5	0.2	28.4	0.084	39	184.18	29	2	0.000166082	99.3528	0.00830409	25.13	0.0119579
2	10.1	125	1046.2	1047.9	1047.05	1.5	0.2	28.4	0.084	39	184.18	29	2	0.000166082	99.3528	0.00830409	25.13	0.00705847
3	10.1	125	1046.2	1047.9	1047.05	1.5	0.2	28.4	0.084	39	184.18	29	2	0.000166082	99.3528	0.00830409	25.13	0.00274035
4	10.1	125	1046.2	1047.9	1047.05	1.5	0.2	28.4	0.084	39	184.18	29	2	0.000166082	99.3528	0.00830409	25.13	0.00398596
1	10.1	125	1059.1	1063.6	1061.35	3.3	1.1	29.5	0.337	33	184.32	29	2	0.00366467	99.3528	0.183234	25.13	0.263856
2	10.1	125	1059.1	1063.6	1061.35	3.3	1.1	29.5	0.337	33	184.32	29	2	0.00366467	99.3528	0.183234	25.13	0.155749
3	10.1	125	1059.1	1063.6	1061.35	3.3	1.1	29.5	0.337	33	184.32	29	2	0.00366467	99.3528	0.183234	25.13	0.0604671
4	10.1	125	1059.1	1063.6	1061.35	3.3	1.1	29.5	0.337	33	184.32	29	2	0.00366467	99.3528	0.183234	25.13	0.0879522
1	10.85	175	1017.9	1022.5	1020.2	3.1	1	28.6	0.176	31	180.32	29	2	0.0661202	99.2596	0.120219	25.13	0.587869
2	10.85	175	1017.9	1022.5	1020.2	3.1	1	28.6	0.176	31	180.32	29	2	0.0661202	99.2596	0.120219	25.13	0.425574
3	10.85	175	1017.9	1022.5	1020.2	3.1	1	28.6	0.176	31	180.32	29	2	0.0661202	99.2596	0.120219	25.13	0.188743
4	10.85	175	1017.9	1022.5	1020.2	3.1	1	28.6	0.176	31	180.32	29	2	0.0661202	99.2596	0.120219	25.13	0.0913661
5	10.85	175	1017.9	1022.5	1020.2	3.1	1	28.6	0.176	31	180.32	29	2	0.0661202	99.2596	0.120219	25.13	0.147869
6	10.85	175	1017.9	1022.5	1020.2	3.1	1	28.6	0.176	31	180.32	29	2	0.0661202	99.2596	0.120219	25.13	0.189945
7	10.85	175	1017.9	1022.5	1020.2	3.1	1	28.6	0.176	31	180.32	29	2	0.0661202	99.2596	0.120219	25.13	0.159891
8	10.85	175	1017.9	1022.5	1020.2	3.1	1	28.6	0.176	31	180.32	29	2	0.0661202	99.2596	0.120219	25.13	0.100984
9	10.85	175	1017.9	1022.5	1020.2	3.1	1	28.6	0.176	31	180.32	29	2	0.0661202	99.2596	0.120219	25.13	0.229617
10	10.85	175	1017.9	1022.5	1020.2	3.1	1	28.6	0.176	31	180.32	29	2	0.0661202	99.2596	0.120219	25.13	0.223607
11	10.85	175	1017.9	1022.5	1020.2	3.1	1	28.6	0.176	31	180.32	29	2	0.0661202	99.2596	0.120219	25.13	0.222404
12	10.85	175	1017.9	1022.5	1020.2	3.1	1	28.6	0.176	31	180.32	29	2	0.0661202	99.2596	0.120219	25.13	0.167104
1	10.85	175	1026.7	1028.8	1027.75	3.5	1.6	28.5	0.364	33	129.16	19	2	0.218798	99.2596	0.397814	24.83	1.94531
2	10.85	175	1026.7	1028.8	1027.75	3.5	1.6	28.5	0.364	33	129.16	19	2	0.218798	99.2596	0.397814	24.83	1.40826
3	10.85	175	1026.7	1028.8	1027.75	3.5	1.6	28.5	0.364	33	129.16	19	2	0.218798	99.2596	0.397814	24.83	0.624568
4	10.85	175	1026.7	1028.8	1027.75	3.5	1.6	28.5	0.364	33	129.16	19	2	0.218798	99.2596	0.397814	24.83	0.302339
5	10.85	175	1026.7	1028.8	1027.75	3.5	1.6	28.5	0.364	33	129.16	19	2	0.218798	99.2596	0.397814	24.83	0.489311
6	10.85	175	1026.7	1028.8	1027.75	3.5	1.6	28.5	0.364	33	129.16	19	2	0.218798	99.2596	0.397814	24.83	0.628546
7	10.85	175	1026.7	1028.8	1027.75	3.5	1.6	28.5	0.364	33	129.16	19	2	0.218798	99.2596	0.397814	24.83	0.529093
8	10.85	175	1026.7	1028.8	1027.75	3.5	1.6	28.5	0.364	33	129.16	19	2	0.218798	99.2596	0.397814	24.83	0.334164
9	10.85	175	1026.7	1028.8	1027.75	3.5	1.6	28.5	0.364	33	129.16	19	2	0.218798	99.2596	0.397814	24.83	0.759825
10	10.85	175	1026.7	1028.8	1027.75	3.5	1.6	28.5	0.364	33	129.16	19	2	0.218798	99.2596	0.397814	24.83	0.739934
11	10.85	175	1026.7	1028.8	1027.75	3.5	1.6	28.5	0.364	33	129.16	19	2	0.218798	99.2596	0.397814	24.83	0.735956
12	10.85	175	1026.7	1028.8	1027.75	3.5	1.6	28.5	0.364	33	129.16	19	2	0.218798	99.2596	0.397814	24.83	0.552962
1	10.85	175	1038.2	1047.2	1042.7	6.1	1.8	30.7	0.392	37	176.68	29	2	0.265082	99.2596	0.481967	25.13	2.35682
2	10.85	175	1038.2	1047.2	1042.7	6.1	1.8	30.7	0.392	37	176.68	29	2	0.265082	99.2596	0.481967	25.13	1.70616
3	10.85	175	1038.2	1047.2	1042.7	6.1	1.8	30.7	0.392	37	176.68	29	2	0.265082	99.2596	0.481967	25.13	0.756689
4	10.85	175	1038.2	1047.2	1042.7	6.1	1.8	30.7	0.392	37	176.68	29	2	0.265082	99.2596	0.481967	25.13	0.366295
5	10.85	175	1038.2	1047.2	1042.7	6.1	1.8	30.7	0.392	37	176.68	29	2	0.265082	99.2596	0.481967	25.13	0.59282
6	10.85	175	1038.2	1047.2	1042.7	6.1	1.8	30.7	0.392	37	176.68	29	2	0.265082	99.2596	0.481967	25.13	0.761508
7	10.85	175	1038.2	1047.2	1042.7	6.1	1.8	30.7	0.392	37	176.68	29	2	0.265082	99.2596	0.481967	25.13	0.641016
8	10.85	175	1038.2	1047.2	1042.7	6.1	1.8	30.7	0.392	37	176.68	29	2	0.265082	99.2596	0.481967	25.13	0.404852
9	10.85	175	1038.2	1047.2	1042.7	6.1	1.8	30.7	0.392	37	176.68	29	2	0.265082	99.2596	0.481967	25.13	0.920557
10	10.85	175	1038.2	1047.2	1042.7	6.1	1.8	30.7	0.392	37	176.68	29	2	0.265082	99.2596	0.481967	25.13	0.896459
11	10.85	175	1038.2	1047.2	1042.7	6.1	1.8	30.7	0.392	37	176.68	29	2	0.265082	99.2596	0.481967	25.13	0.891639
12	10.85	175	1038.2	1047.2	1042.7	6.1	1.8	30.7	0.392	37	176.68	29	2	0.265082	99.2596	0.481967	25.13	0.669934
1	10.26	150	890.6	895.4	893	3.8	1.7	29.6	0.638	26	165	29	2	0.251555	95.667	0.661987	25	1.68145
2	10.26	150	890.6	895.4	893	3.8	1.7	29.6	0.638	26	165	29	2	0.251555	95.667	0.661987	25	4.40222
3	10.26	150	890.6	895.4	893	3.8	1.7	29.6	0.638	26	165	29	2	0.251555	95.667	0.661987	25	7.43412
4	10.26	150	890.6	895.4	893	3.8	1.7	29.6	0.638	26	165	29	2	0.251555	95.667	0.661987	25	6.94425
5	10.26	150	890.6	895.4	893	3.8	1.7	29.6	0.638	26	165	29	2	0.251555	95.667	0.661987	25	3.61445
6	10.26	150	890.6	895.4	893	3.8	1.7	29.6	0.638	26	165	29	2	0.251555	95.667	0.661987	25	5.48787
7	10.26	150	890.6	895.4	893	3.8	1.7	29.6	0.638	26	165	29	2	0.251555	95.667	0.661987	25	5.24956
8	10.26	150	890.6	895.4	893	3.8	1.7	29.6	0.638	26	165	29	2	0.251555	95.667	0.661987	25	5.34224
9	10.26	150	890.6	895.4	893	3.8	1.7	29.6	0.638	26	165	29	2	0.251555	95.667	0.661987	25	4.998
10	10.26	150	890.6	895.4	893	3.8	1.7	29.6	0.638	26	165	29	2	0.251555	95.667	0.661987	25	3.79319
11	10.26	150	890.6	895.4	893	3.8	1.7	29.6	0.638	26	165	29	2	0.251555	95.667	0.661987	25	3.63431
12	10.26	150	890.6	895.4	893	3.8	1.7	29.6	0.638	26	165	29	2	0.251555	95.667	0.661987	25	3.55487
1	9.5	175	973	981	977	5.4	2	31.6	0.409	28	284.88	47	2	0.632426	91.4105	0.133142	25.05	0.499284
2	9.5	175	973	981	977	5.4	2	31.6	0.409	28	284.88	47	2	0.632426	91.4105	0.133142	25.05	0.471324
3	9.5	175	973	981	977	5.4	2	31.6	0.409	28	284.88	47	2	0.632426	91.4105	0.133142	25.05	0.564524
4	9.5	175	973	981	977	5.4	2	31.6	0.409	28	284.88	47	2	0.632426	91.4105	0.133142	25.05	0.845454
5	9.5	175	973	981	977	5.4	2	31.6	0.409	28	284.88	47	2	0.632426	91.4105	0.133142	25.05	0.83214
6	9.5	175	973	981	977	5.4	2	31.6	0.409	28	284.88	47	2	0.632426	91.4105	0.133142	25.05	0.499284
7	9.5	175	973	981	977	5.4	2	31.6	0.409	28	284.88	47	2	0.632426	91.4105	0.133142	25.05	0.528575
8	9.5	175	973	981	977	5.4	2	31.6	0.409	28	284.88	47	2	0.632426	91.4105	0.133142	25.05	0.295576
9	9.5	175	973	981	977	5.4	2	31.6	0.409	28	284.88	47	2	0.632426	91.4105	0.133142	25.05	0.186399
1	10.26	150	855	856.7	855.85	1.2	0.2	27.1	0.107	30	145.04	23	2	0.00207106	92.5532	0.00739665	24.55	0.019897
2	10.26	150	855	856.7	855.85	1.2	0.2	27.1	0.107	30	145.04	23	2	0.00207106	92.5532	0.00739665	24.55	0.00983755
3	10.26	150	855	856.7	855.85	1.2	0.2	27.1	0.107	30	145.04	23	2	0.00207106	92.5532	0.00739665	24.55	0.013314
4	10.26	150	855	856.7	855.85	1.2	0.2	27.1	0.107	30	145.04	23	2	0.00207106	92.5532	0.00739665	24.55	0.0342465
5	10.26	150	855	856.7	855.85	1.2	0.2	27.1	0.107	30	145.04	23	2	0.00207106	92.5532	0.00739665	24.55	0.0193053
6	10.26	150	855	856.7	855.85	1.2	0.2	27.1	0.107	30	145.04	23	2	0.00207106	92.5532	0.00739665	24.55	0.0187135
7	10.26	150	855	856.7	855.85	1.2	0.2	27.1	0.107	30	145.04	23	2	0.00207106	92.5532	0.00739665	24.55	0.0150892
8	10.26	150	855	856.7	855.85	1.2	0.2	27.1	0.107	30	145.04	23	2	0.00207106	92.5532	0.00739665	24.55	0.0210065
9	10.26	150	855	856.7	855.85	1.2	0.2	27.1	0.107	30	145.04	23	2	0.00207106	92.5532	0.00739665	24.55	0.0278854
10	10.26	150	855	856.7	855.85	1.2	0.2	27.1	0.107	30	145.04	23	2	0.00207106	92.5532	0.00739665	24.55	0.0254445
11	10.26	150	855	856.7	855.85	1.2	0.2	27.1	0.107	30	145.04	23	2	0.00207106	92.5532	0.00739665	24.55	0.0284032
12	10.26	150	855	856.7	855.85	1.2	0.2	27.1	0.107	30	145.04	23	2	0.00207106	92.5532	0.00739665	24.55	0.0404597
1	10.62	175	1008.9	1016.7	1012.8	5.6	3.4	28.6	0.741	32	179.96	29	2	0.750954	95.7232	0.521496	24.88	2.69614
2	10.62	175	1008.9	1016.7	1012.8	5.6	3.4	28.6	0.741	32	179.96	29	2	0.750954	95.7232	0.521496	24.88	1.23595
3	10.62	175	1008.9	1016.7	1012.8	5.6	3.4	28.6	0.741	32	179.96	29	2	0.750954	95.7232	0.521496	24.88	0.730095
4	10.62	175	1008.9	1016.7	1012.8	5.6	3.4	28.6	0.741	32	179.96	29	2	0.750954	95.7232	0.521496	24.88	0.766599
5	10.62	175	1008.9	1016.7	1012.8	5.6	3.4	28.6	0.741	32	179.96	29	2	0.750954	95.7232	0.521496	24.88	0.594506
6	10.62	175	1008.9	1016.7	1012.8	5.6	3.4	28.6	0.741	32	179.96	29	2	0.750954	95.7232	0.521496	24.88	0.396337
7	10.62	175	1008.9	1016.7	1012.8	5.6	3.4	28.6	0.741	32	179.96	29	2	0.750954	95.7232	0.521496	24.88	0.323328
8	10.62	175	1008.9	1016.7	1012.8	5.6	3.4	28.6	0.741	32	179.96	29	2	0.750954	95.7232	0.521496	24.88	0.286823
9	10.62	175	1008.9	1016.7	1012.8	5.6	3.4	28.6	0.741	32	179.96	29	2	0.750954	95.7232	0.521496	24.88	0.333758
10	10.62	175	1008.9	1016.7	1012.8	5.6	3.4	28.6	0.741	32	179.96	29	2	0.750954	95.7232	0.521496	24.88	0.250318
11	10.62	175	1008.9	1016.7	1012.8	5.6	3.4	28.6	0.741	32	179.96	29	2	0.750954	95.7232	0.521496	24.88	0.166879
12	10.62	175	1008.9	1016.7	1012.8	5.6	3.4	28.6	0.741	32	179.96	29	2	0.750954	95.7232	0.521496	24.88	0.198169
1	8.02	125	869.5	878.6	874.05	8.5	5.6	31.3	0.596	31	143	23	2	1.63083	85.3921	0.299785	25.05	3.76231
2	8.02	125	869.5	878.6	874.05	8.5	5.6	31.3	0.596	31	143	23	2	1.63083	85.3921	0.299785	25.05	3.04282
3	8.02	125	869.5	878.6	874.05	8.5	5.6	31.3	0.596	31	143	23	2	1.63083	85.3921	0.299785	25.05	3.82526
4	8.02	125	869.5	878.6	874.05	8.5	5.6	31.3	0.596	31	143	23	2	1.63083	85.3921	0.299785	25.05	3.46252
5	8.02	125	869.5	878.6	874.05	8.5	5.6	31.3	0.596	31	143	23	2	1.63083	85.3921	0.299785	25.05	2.72805
6	8.02	125	869.5	878.6	874.05	8.5	5.6	31.3	0.596	31	143	23	2	1.63083	85.3921	0.299785	25.05	2.03854
7	8.02	125	869.5	878.6	874.05	8.5	5.6	31.3	0.596	31	143	23	2	1.63083	85.3921	0.299785	25.05	1.72077
8	8.02	125	869.5	878.6	874.05	8.5	5.6	31.3	0.596	31	143	23	2	1.63083	85.3921	0.299785	25.05	1.51691
9	8.02	125	869.5	878.6	874.05	8.5	5.6	31.3	0.596	31	143	23	2	1.63083	85.3921	0.299785	25.05	1.41199
1	7.95	125	822.5	824.6	823.55	1.7	1.2	28.6	0.256	22	153.37	23	2	0.175785	91.6837	0.0865938	25	0.427773
2	7.95	125	822.5	824.6	823.55	1.7	1.2	28.6	0.256	22	153.37	23	2	0.175785	91.6837	0.0865938	25	0.356766
3	7.95	125	822.5	824.6	823.55	1.7	1.2	28.6	0.256	22	153.37	23	2	0.175785	91.6837	0.0865938	25	0.351571
4	7.95	125	822.5	824.6	823.55	1.7	1.2	28.6	0.256	22	153.37	23	2	0.175785	91.6837	0.0865938	25	0.470204
5	7.95	125	822.5	824.6	823.55	1.7	1.2	28.6	0.256	22	153.37	23	2	0.175785	91.6837	0.0865938	25	0.709203
6	7.95	125	822.5	824.6	823.55	1.7	1.2	28.6	0.256	22	153.37	23	2	0.175785	91.6837	0.0865938	25	0.77155
7	7.95	125	822.5	824.6	823.55	1.7	1.2	28.6	0.256	22	153.37	23	2	0.175785	91.6837	0.0865938	25	1.00102
8	7.95	125	822.5	824.6	823.55	1.7	1.2	28.6	0.256	22	153.37	23	2	0.175785	91.6837	0.0865938	25	0.759427
9	7.95	125	822.5	824.6	823.55	1.7	1.2	28.6	0.256	22	153.37	23	2	0.175785	91.6837	0.0865938	25	0.822641
10	7.95	125	822.5	824.6	823.55	1.7	1.2	28.6	0.256	22	153.37	23	2	0.175785	91.6837	0.0865938	25	0.989767
11	7.95	125	822.5	824.6	823.55	1.7	1.2	28.6	0.256	22	153.37	23	2	0.175785	91.6837	0.0865938	25	0.556798
1	7.95	125	842.2	844.4	843.3	1.7	1	29.5	0.317	21	153.52	23	2	0.181393	91.6837	0.0893562	25	0.44142
2	7.95	125	842.2	844.4	843.3	1.7	1	29.5	0.317	21	153.52	23	2	0.181393	91.6837	0.0893562	25	0.368147
3	7.95	125	842.2	844.4	843.3	1.7	1	29.5	0.317	21	153.52	23	2	0.181393	91.6837	0.0893562	25	0.362786
4	7.95	125	842.2	844.4	843.3	1.7	1	29.5	0.317	21	153.52	23	2	0.181393	91.6837	0.0893562	25	0.485204
5	7.95	125	842.2	844.4	843.3	1.7	1	29.5	0.317	21	153.52	23	2	0.181393	91.6837	0.0893562	25	0.731827
6	7.95	125	842.2	844.4	843.3	1.7	1	29.5	0.317	21	153.52	23	2	0.181393	91.6837	0.0893562	25	0.796164
7	7.95	125	842.2	844.4	843.3	1.7	1	29.5	0.317	21	153.52	23	2	0.181393	91.6837	0.0893562	25	1.03296
8	7.95	125	842.2	844.4	843.3	1.7	1	29.5	0.317	21	153.52	23	2	0.181393	91.6837	0.0893562	25	0.783654
9	7.95	125	842.2	844.4	843.3	1.7	1	29.5	0.317	21	153.52	23	2	0.181393	91.6837	0.0893562	25	0.848884
10	7.95	125	842.2	844.4	843.3	1.7	1	29.5	0.317	21	153.52	23	2	0.181393	91.6837	0.0893562	25	1.02134
11	7.95	125	842.2	844.4	843.3	1.7	1	29.5	0.317	21	153.52	23	2	0.181393	91.6837	0.0893562	25	0.57456
1	8.29	125	877.3	885.1	881.2	5.1	2.8	30.8	0.616	27	143.84	23	2	2.21648	81.9194	0.401536	24.89	1.35318
2	8.29	125	877.3	885.1	881.2	5.1	2.8	30.8	0.616	27	143.84	23	2	2.21648	81.9194	0.401536	24.89	0.859288
3	8.29	125	877.3	885.1	881.2	5.1	2.8	30.8	0.616	27	143.84	23	2	2.21648	81.9194	0.401536	24.89	1.21666
4	8.29	125	877.3	885.1	881.2	5.1	2.8	30.8	0.616	27	143.84	23	2	2.21648	81.9194	0.401536	24.89	0.413583
1	8.29	125	895.5	902.1	898.8	5.1	1.9	30.3	0.703	24	166.8	27	2	1.71646	81.9194	0.310953	24.92	1.04791
2	8.29	125	895.5	902.1	898.8	5.1	1.9	30.3	0.703	24	166.8	27	2	1.71646	81.9194	0.310953	24.92	0.66544
3	8.29	125	895.5	902.1	898.8	5.1	1.9	30.3	0.703	24	166.8	27	2	1.71646	81.9194	0.310953	24.92	0.942189
4	8.29	125	895.5	902.1	898.8	5.1	1.9	30.3	0.703	24	166.8	27	2	1.71646	81.9194	0.310953	24.92	0.320282
1	7.95	125	875.9	884	879.95	6.4	4.1	30.4	0.604	29	201.58	33	2	0.81465	93.1979	0.338029	25.02	1.04451
2	7.95	125	875.9	884	879.95	6.4	4.1	30.4	0.604	29	201.58	33	2	0.81465	93.1979	0.338029	25.02	0.922819
3	7.95	125	875.9	884	879.95	6.4	4.1	30.4	0.604	29	201.58	33	2	0.81465	93.1979	0.338029	25.02	0.676058
4	7.95	125	875.9	884	879.95	6.4	4.1	30.4	0.604	29	201.58	33	2	0.81465	93.1979	0.338029	25.02	0.534086
5	7.95	125	875.9	884	879.95	6.4	4.1	30.4	0.604	29	201.58	33	2	0.81465	93.1979	0.338029	25.02	0.608452
6	7.95	125	875.9	884	879.95	6.4	4.1	30.4	0.604	29	201.58	33	2	0.81465	93.1979	0.338029	25.02	0.807889
7	7.95	125	875.9	884	879.95	6.4	4.1	30.4	0.604	29	201.58	33	2	0.81465	93.1979	0.338029	25.02	0.35493
8	7.95	125	875.9	884	879.95	6.4	4.1	30.4	0.604	29	201.58	33	2	0.81465	93.1979	0.338029	25.02	0.108169
9	7.95	125	875.9	884	879.95	6.4	4.1	30.4	0.604	29	201.58	33	2	0.81465	93.1979	0.338029	25.02	0.23662
10	7.95	125	875.9	884	879.95	6.4	4.1	30.4	0.604	29	201.58	33	2	0.81465	93.1979	0.338029	25.02	0.0473241
11	7.95	125	875.9	884	879.95	6.4	4.1	30.4	0.604	29	201.58	33	2	0.81465	93.1979	0.338029	25.02	0.185916
1	7.95	125	894	902.9	898.45	7.2	5.6	30.9	0.866	27	201.36	33	2	1.59535	93.1979	0.661971	25.02	2.04549
2	7.95	125	894	902.9	898.45	7.2	5.6	30.9	0.866	27	201.36	33	2	1.59535	93.1979	0.661971	25.02	1.80718
3	7.95	125	894	902.9	898.45	7.2	5.6	30.9	0.866	27	201.36	33	2	1.59535	93.1979	0.661971	25.02	1.32394
4	7.95	125	894	902.9	898.45	7.2	5.6	30.9	0.866	27	201.36	33	2	1.59535	93.1979	0.661971	25.02	1.04591
5	7.95	125	894	902.9	898.45	7.2	5.6	30.9	0.866	27	201.36	33	2	1.59535	93.1979	0.661971	25.02	1.19155
6	7.95	125	894	902.9	898.45	7.2	5.6	30.9	0.866	27	201.36	33	2	1.59535	93.1979	0.661971	25.02	1.58211
7	7.95	125	894	902.9	898.45	7.2	5.6	30.9	0.866	27	201.36	33	2	1.59535	93.1979	0.661971	25.02	0.69507
8	7.95	125	894	902.9	898.45	7.2	5.6	30.9	0.866	27	201.36	33	2	1.59535	93.1979	0.661971	25.02	0.211831
9	7.95	125	894	902.9	898.45	7.2	5.6	30.9	0.866	27	201.36	33	2	1.59535	93.1979	0.661971	25.02	0.46338
10	7.95	125	894	902.9	898.45	7.2	5.6	30.9	0.866	27	201.36	33	2	1.59535	93.1979	0.661971	25.02	0.0926759
11	7.95	125	894	902.9	898.45	7.2	5.6	30.9	0.866	27	201.36	33	2	1.59535	93.1979	0.661971	25.02	0.364084
1	10.26	150	890.8	892.6	891.7	1.1	0.3	27.3	0.067	28	135.43	23	2	0.022016	85.4595	0.0103849	24.74	0.0164082
2	10.26	150	890.8	892.6	891.7	1.1	0.3	27.3	0.067	28	135.43	23	2	0.022016	85.4595	0.0103849	24.74	0.0292855
3	10.26	150	890.8	892.6	891.7	1.1	0.3	27.3	0.067	28	135.43	23	2	0.022016	85.4595	0.0103849	24.74	0.0802754
4	10.26	150	890.8	892.6	891.7	1.1	0.3	27.3	0.067	28	135.43	23	2	0.022016	85.4595	0.0103849	24.74	0.0487052
5	10.26	150	890.8	892.6	891.7	1.1	0.3	27.3	0.067	28	135.43	23	2	0.022016	85.4595	0.0103849	24.74	0.0442397
6	10.26	150	890.8	892.6	891.7	1.1	0.3	27.3	0.067	28	135.43	23	2	0.022016	85.4595	0.0103849	24.74	0.0306355
7	10.26	150	890.8	892.6	891.7	1.1	0.3	27.3	0.067	28	135.43	23	2	0.022016	85.4595	0.0103849	24.74	0.0137081
8	10.26	150	890.8	892.6	891.7	1.1	0.3	27.3	0.067	28	135.43	23	2	0.022016	85.4595	0.0103849	24.74	0.015162
1	10.26	150	900	902.6	901.3	1.8	0.2	27.4	0.067	39	165.08	29	2	0.0146773	85.4595	0.00692328	26.21	0.0109388
2	10.26	150	900	902.6	901.3	1.8	0.2	27.4	0.067	39	165.08	29	2	0.0146773	85.4595	0.00692328	26.21	0.0195236
3	10.26	150	900	902.6	901.3	1.8	0.2	27.4	0.067	39	165.08	29	2	0.0146773	85.4595	0.00692328	26.21	0.0535169
4	10.26	150	900	902.6	901.3	1.8	0.2	27.4	0.067	39	165.08	29	2	0.0146773	85.4595	0.00692328	26.21	0.0324702
5	10.26	150	900	902.6	901.3	1.8	0.2	27.4	0.067	39	165.08	29	2	0.0146773	85.4595	0.00692328	26.21	0.0294932
6	10.26	150	900	902.6	901.3	1.8	0.2	27.4	0.067	39	165.08	29	2	0.0146773	85.4595	0.00692328	26.21	0.0204237
7	10.26	150	900	902.6	901.3	1.8	0.2	27.4	0.067	39	165.08	29	2	0.0146773	85.4595	0.00692328	26.21	0.00913872
8	10.26	150	900	902.6	901.3	1.8	0.2	27.4	0.067	39	165.08	29	2	0.0146773	85.4595	0.00692328	26.21	0.010108
1	11.49	125	1120	1126.4	1123.2	3.2	0.2	26.4	0.062	34	179.04	29	2	0.00758352	85.3155	0.00626737	25	0.000188021
2	11.49	125	1120	1126.4	1123.2	3.2	0.2	26.4	0.062	34	179.04	29	2	0.00758352	85.3155	0.00626737	25	0.00162952
3	11.49	125	1120	1126.4	1123.2	3.2	0.2	26.4	0.062	34	179.04	29	2	0.00758352	85.3155	0.00626737	25	0.000376042
1	11.49	125	1140.3	1144.8	1142.55	3.3	0.5	26.8	0.062	34	179.04	29	2	0.0189588	85.3155	0.0156684	25	0.000470053
2	11.49	125	1140.3	1144.8	1142.55	3.3	0.5	26.8	0.062	34	179.04	29	2	0.0189588	85.3155	0.0156684	25	0.00407379
3	11.49	125	1140.3	1144.8	1142.55	3.3	0.5	26.8	0.062	34	179.04	29	2	0.0189588	85.3155	0.0156684	25	0.000940106
1	8.02	125	846.5	850.7	848.6	3.4	2.3	29.3	0.424	24	201.6	33	2	1.25199	89.7424	0.288478	25.02	1.33565
2	8.02	125	846.5	850.7	848.6	3.4	2.3	29.3	0.424	24	201.6	33	2	1.25199	89.7424	0.288478	25.02	0.32598
3	8.02	125	846.5	850.7	848.6	3.4	2.3	29.3	0.424	24	201.6	33	2	1.25199	89.7424	0.288478	25.02	0.360598
4	8.02	125	846.5	850.7	848.6	3.4	2.3	29.3	0.424	24	201.6	33	2	1.25199	89.7424	0.288478	25.02	0.314441
5	8.02	125	846.5	850.7	848.6	3.4	2.3	29.3	0.424	24	201.6	33	2	1.25199	89.7424	0.288478	25.02	0.475989
6	8.02	125	846.5	850.7	848.6	3.4	2.3	29.3	0.424	24	201.6	33	2	1.25199	89.7424	0.288478	25.02	0.533684
7	8.02	125	846.5	850.7	848.6	3.4	2.3	29.3	0.424	24	201.6	33	2	1.25199	89.7424	0.288478	25.02	0.351943
8	8.02	125	846.5	850.7	848.6	3.4	2.3	29.3	0.424	24	201.6	33	2	1.25199	89.7424	0.288478	25.02	0.0288478
1	10.62	150	866.2	875.9	871.05	9	6.5	31.5	0.648	25	108.6	17	2	4.58471	78.0568	0.760316	24.94	2.20492
2	10.62	150	866.2	875.9	871.05	9	6.5	31.5	0.648	25	108.6	17	2	4.58471	78.0568	0.760316	24.94	0.501809
3	10.62	150	866.2	875.9	871.05	9	6.5	31.5	0.648	25	108.6	17	2	4.58471	78.0568	0.760316	24.94	1.26212
4	10.62	150	866.2	875.9	871.05	9	6.5	31.5	0.648	25	108.6	17	2	4.58471	78.0568	0.760316	24.94	0.0684285
6	10.62	150	866.2	875.9	871.05	9	6.5	31.5	0.648	25	108.6	17	2	4.58471	78.0568	0.760316	24.94	0.0152063
1	10.62	150	877.6	882.2	879.9	3.6	2	29.5	0.365	30	178.84	29	2	0.794595	78.0568	0.131774	24.95	0.382144
2	10.62	150	877.6	882.2	879.9	3.6	2	29.5	0.365	30	178.84	29	2	0.794595	78.0568	0.131774	24.95	0.0869706
3	10.62	150	877.6	882.2	879.9	3.6	2	29.5	0.365	30	178.84	29	2	0.794595	78.0568	0.131774	24.95	0.218744
4	10.62	150	877.6	882.2	879.9	3.6	2	29.5	0.365	30	178.84	29	2	0.794595	78.0568	0.131774	24.95	0.0118596
6	10.62	150	877.6	882.2	879.9	3.6	2	29.5	0.365	30	178.84	29	2	0.794595	78.0568	0.131774	24.95	0.00263547
1	10.62	150	884.2	889.6	886.9	4.5	1.4	31.3	0.427	29	283.56	47	2	0.650697	78.0568	0.10791	25.01	0.312939
2	10.62	150	884.2	889.6	886.9	4.5	1.4	31.3	0.427	29	283.56	47	2	0.650697	78.0568	0.10791	25.01	0.0712206
3	10.62	150	884.2	889.6	886.9	4.5	1.4	31.3	0.427	29	283.56	47	2	0.650697	78.0568	0.10791	25.01	0.179131
4	10.62	150	884.2	889.6	886.9	4.5	1.4	31.3	0.427	29	283.56	47	2	0.650697	78.0568	0.10791	25.01	0.0097119
6	10.62	150	884.2	889.6	886.9	4.5	1.4	31.3	0.427	29	283.56	47	2	0.650697	78.0568	0.10791	25.01	0.0021582
1	8.08	125	830.5	842.2	836.35	8.7	4.6	30.3	0.476	30	165	29	2	1.21436	94.3833	0.505985	25	1.29532
2	8.08	125	830.5	842.2	836.35	8.7	4.6	30.3	0.476	30	165	29	2	1.21436	94.3833	0.505985	25	0.996791
3	8.08	125	830.5	842.2	836.35	8.7	4.6	30.3	0.476	30	165	29	2	1.21436	94.3833	0.505985	25	1.05245
4	8.08	125	830.5	842.2	836.35	8.7	4.6	30.3	0.476	30	165	29	2	1.21436	94.3833	0.505985	25	0.728619
5	8.08	125	830.5	842.2	836.35	8.7	4.6	30.3	0.476	30	165	29	2	1.21436	94.3833	0.505985	25	0.748858
6	8.08	125	830.5	842.2	836.35	8.7	4.6	30.3	0.476	30	165	29	2	1.21436	94.3833	0.505985	25	0.121436
1	8.08	125	843.8	849.6	846.7	4.7	1.8	30.9	0.411	31	165	29	2	0.410297	94.3833	0.170957	25	0.43765
2	8.08	125	843.8	849.6	846.7	4.7	1.8	30.9	0.411	31	165	29	2	0.410297	94.3833	0.170957	25	0.336786
3	8.08	125	843.8	849.6	846.7	4.7	1.8	30.9	0.411	31	165	29	2	0.410297	94.3833	0.170957	25	0.355591
4	8.08	125	843.8	849.6	846.7	4.7	1.8	30.9	0.411	31	165	29	2	0.410297	94.3833	0.170957	25	0.246178
5	8.08	125	843.8	849.6	846.7	4.7	1.8	30.9	0.411	31	165	29	2	0.410297	94.3833	0.170957	25	0.253017
6	8.08	125	843.8	849.6	846.7	4.7	1.8	30.9	0.411	31	165	29	2	0.410297	94.3833	0.170957	25	0.0410297
1	8.08	125	853.4	858.7	856.05	3.2	1.5	27.6	0.29	30	134.9	23	2	0.241253	94.3833	0.100522	25.1	0.257337
2	8.08	125	853.4	858.7	856.05	3.2	1.5	27.6	0.29	30	134.9	23	2	0.241253	94.3833	0.100522	25.1	0.198029
3	8.08	125	853.4	858.7	856.05	3.2	1.5	27.6	0.29	30	134.9	23	2	0.241253	94.3833	0.100522	25.1	0.209086
4	8.08	125	853.4	858.7	856.05	3.2	1.5	27.6	0.29	30	134.9	23	2	0.241253	94.3833	0.100522	25.1	0.144752
5	8.08	125	853.4	858.7	856.05	3.2	1.5	27.6	0.29	30	134.9	23	2	0.241253	94.3833	0.100522	25.1	0.148773
6	8.08	125	853.4	858.7	856.05	3.2	1.5	27.6	0.29	30	134.9	23	2	0.241253	94.3833	0.100522	25.1	0.0241253
1	8.02	125	858.1	866	862.05	6.1	4.6	30.1	0.509	26	205	37	2	0.54369	94.0789	0.464693	25	4.49822
2	8.02	125	858.1	866	862.05	6.1	4.6	30.1	0.509	26	205	37	2	0.54369	94.0789	0.464693	25	3.32255
3	8.02	125	858.1	866	862.05	6.1	4.6	30.1	0.509	26	205	37	2	0.54369	94.0789	0.464693	25	3.16456
4	8.02	125	858.1	866	862.05	6.1	4.6	30.1	0.509	26	205	37	2	0.54369	94.0789	0.464693	25	2.69057
5	8.02	125	858.1	866	862.05	6.1	4.6	30.1	0.509	26	205	37	2	0.54369	94.0789	0.464693	25	2.25841
6	8.02	125	858.1	866	862.05	6.1	4.6	30.1	0.509	26	205	37	2	0.54369	94.0789	0.464693	25	2.28164
7	8.02	125	858.1	866	862.05	6.1	4.6	30.1	0.509	26	205	37	2	0.54369	94.0789	0.464693	25	1.74724
8	8.02	125	858.1	866	862.05	6.1	4.6	30.1	0.509	26	205	37	2	0.54369	94.0789	0.464693	25	1.29185
9	8.02	125	858.1	866	862.05	6.1	4.6	30.1	0.509	26	205	37	2	0.54369	94.0789	0.464693	25	1.09667
10	8.02	125	858.1	866	862.05	6.1	4.6	30.1	0.509	26	205	37	2	0.54369	94.0789	0.464693	25	1.32902
11	8.02	125	858.1	866	862.05	6.1	4.6	30.1	0.509	26	205	37	2	0.54369	94.0789	0.464693	25	1.20355
12	8.02	125	858.1	866	862.05	6.1	4.6	30.1	0.509	26	205	37	2	0.54369	94.0789	0.464693	25	1.16173
1	10.26	150	848.8	854.2	851.5	4.6	1.3	29.4	0.205	18	165	29	2	0.0224491	93.4483	0.0590765	25	0.148282
2	10.26	150	848.8	854.2	851.5	4.6	1.3	29.4	0.205	18	165	29	2	0.0224491	93.4483	0.0590765	25	0.0608488
3	10.26	150	848.8	854.2	851.5	4.6	1.3	29.4	0.205	18	165	29	2	0.0224491	93.4483	0.0590765	25	0.0271752
4	10.26	150	848.8	854.2	851.5	4.6	1.3	29.4	0.205	18	165	29	2	0.0224491	93.4483	0.0590765	25	0.0419443
5	10.26	150	848.8	854.2	851.5	4.6	1.3	29.4	0.205	18	165	29	2	0.0224491	93.4483	0.0590765	25	0.0330828
6	10.26	150	848.8	854.2	851.5	4.6	1.3	29.4	0.205	18	165	29	2	0.0224491	93.4483	0.0590765	25	0.0259937
7	10.26	150	848.8	854.2	851.5	4.6	1.3	29.4	0.205	18	165	29	2	0.0224491	93.4483	0.0590765	25	0.0454889
8	10.26	150	848.8	854.2	851.5	4.6	1.3	29.4	0.205	18	165	29	2	0.0224491	93.4483	0.0590765	25	0.047852
9	10.26	150	848.8	854.2	851.5	4.6	1.3	29.4	0.205	18	165	29	2	0.0224491	93.4483	0.0590765	25	0.0537596
1	10.26	150	1005.9	1015.1	1010.5	7.6	2.9	30.8	0.693	27	165.2	29	2	0.423584	90.9471	0.244846	25.77	0.411342
2	10.26	150	1005.9	1015.1	1010.5	7.6	2.9	30.8	0.693	27	165.2	29	2	0.423584	90.9471	0.244846	25.77	0.279125
3	10.26	150	1005.9	1015.1	1010.5	7.6	2.9	30.8	0.693	27	165.2	29	2	0.423584	90.9471	0.244846	25.77	0.0710055
1	10.26	150	1018.8	1031.7	1025.25	9.5	7.1	28.2	0.873	32	170.3	29	2	1.30642	90.9471	0.755154	25.64	1.26866
2	10.26	150	1018.8	1031.7	1025.25	9.5	7.1	28.2	0.873	32	170.3	29	2	1.30642	90.9471	0.755154	25.64	0.860875
3	10.26	150	1018.8	1031.7	1025.25	9.5	7.1	28.2	0.873	32	170.3	29	2	1.30642	90.9471	0.755154	25.64	0.218995
1	8.02	125	863.5	868.1	865.8	3.2	1.4	28.5	0.256	30	178.56	29	2	0.61684	89.2857	0.316328	25	3.20757
2	8.02	125	863.5	868.1	865.8	3.2	1.4	28.5	0.256	30	178.56	29	2	0.61684	89.2857	0.316328	25	4.40645
3	8.02	125	863.5	868.1	865.8	3.2	1.4	28.5	0.256	30	178.56	29	2	0.61684	89.2857	0.316328	25	4.049
4	8.02	125	863.5	868.1	865.8	3.2	1.4	28.5	0.256	30	178.56	29	2	0.61684	89.2857	0.316328	25	3.23288
5	8.02	125	863.5	868.1	865.8	3.2	1.4	28.5	0.256	30	178.56	29	2	0.61684	89.2857	0.316328	25	2.00236
6	8.02	125	863.5	868.1	865.8	3.2	1.4	28.5	0.256	30	178.56	29	2	0.61684	89.2857	0.316328	25	1.16409
7	8.02	125	863.5	868.1	865.8	3.2	1.4	28.5	0.256	30	178.56	29	2	0.61684	89.2857	0.316328	25	1.30644
8	8.02	125	863.5	868.1	865.8	3.2	1.4	28.5	0.256	30	178.56	29	2	0.61684	89.2857	0.316328	25	1.21154
1	8.02	125	878.8	885.9	882.35	4.6	2.4	29.3	0.253	31	225.6	37	2	1.04505	89.2857	0.535922	24.93	5.43425
2	8.02	125	878.8	885.9	882.35	4.6	2.4	29.3	0.253	31	225.6	37	2	1.04505	89.2857	0.535922	24.93	7.4654
3	8.02	125	878.8	885.9	882.35	4.6	2.4	29.3	0.253	31	225.6	37	2	1.04505	89.2857	0.535922	24.93	6.85981
4	8.02	125	878.8	885.9	882.35	4.6	2.4	29.3	0.253	31	225.6	37	2	1.04505	89.2857	0.535922	24.93	5.47713
5	8.02	125	878.8	885.9	882.35	4.6	2.4	29.3	0.253	31	225.6	37	2	1.04505	89.2857	0.535922	24.93	3.39239
6	8.02	125	878.8	885.9	882.35	4.6	2.4	29.3	0.253	31	225.6	37	2	1.04505	89.2857	0.535922	24.93	1.97219
7	8.02	125	878.8	885.9	882.35	4.6	2.4	29.3	0.253	31	225.6	37	2	1.04505	89.2857	0.535922	24.93	2.21336
8	8.02	125	878.8	885.9	882.35	4.6	2.4	29.3	0.253	31	225.6	37	2	1.04505	89.2857	0.535922	24.93	2.05258
1	10.32	175	927.2	932.4	929.8	4.8	4.4	29.8	1.26	23	239.24	37	2	1.48461	92.7792	0.863148	25	5.55867
2	10.32	175	927.2	932.4	929.8	4.8	4.4	29.8	1.26	23	239.24	37	2	1.48461	92.7792	0.863148	25	5.07531
3	10.32	175	927.2	932.4	929.8	4.8	4.4	29.8	1.26	23	239.24	37	2	1.48461	92.7792	0.863148	25	5.04078
4	10.32	175	927.2	932.4	929.8	4.8	4.4	29.8	1.26	23	239.24	37	2	1.48461	92.7792	0.863148	25	4.44521
5	10.32	175	927.2	932.4	929.8	4.8	4.4	29.8	1.26	23	239.24	37	2	1.48461	92.7792	0.863148	25	3.59933
6	10.32	175	927.2	932.4	929.8	4.8	4.4	29.8	1.26	23	239.24	37	2	1.48461	92.7792	0.863148	25	3.15912
7	10.32	175	927.2	932.4	929.8	4.8	4.4	29.8	1.26	23	239.24	37	2	1.48461	92.7792	0.863148	25	2.58081
8	10.32	175	927.2	932.4	929.8	4.8	4.4	29.8	1.26	23	239.24	37	2	1.48461	92.7792	0.863148	25	3.61659
9	10.32	175	927.2	932.4	929.8	4.8	4.4	29.8	1.26	23	239.24	37	2	1.48461	92.7792	0.863148	25	4.25532
10	10.32	175	927.2	932.4	929.8	4.8	4.4	29.8	1.26	23	239.24	37	2	1.48461	92.7792	0.863148	25	2.36503
11	10.32	175	927.2	932.4	929.8	4.8	4.4	29.8	1.26	23	239.24	37	2	1.48461	92.7792	0.863148	25	2.17513
12	10.32	175	927.2	932.4	929.8	4.8	4.4	29.8	1.26	23	239.24	37	2	1.48461	92.7792	0.863148	25	2.69302
1	10.32	175	944.6	950.8	947.7	4.1	2.6	30.1	0.24	21	185.4	29	2	0.167099	92.7792	0.0971509	24.9	0.625652
2	10.32	175	944.6	950.8	947.7	4.1	2.6	30.1	0.24	21	185.4	29	2	0.167099	92.7792	0.0971509	24.9	0.571247
3	10.32	175	944.6	950.8	947.7	4.1	2.6	30.1	0.24	21	185.4	29	2	0.167099	92.7792	0.0971509	24.9	0.567361
4	10.32	175	944.6	950.8	947.7	4.1	2.6	30.1	0.24	21	185.4	29	2	0.167099	92.7792	0.0971509	24.9	0.500327
5	10.32	175	944.6	950.8	947.7	4.1	2.6	30.1	0.24	21	185.4	29	2	0.167099	92.7792	0.0971509	24.9	0.405119
6	10.32	175	944.6	950.8	947.7	4.1	2.6	30.1	0.24	21	185.4	29	2	0.167099	92.7792	0.0971509	24.9	0.355572
7	10.32	175	944.6	950.8	947.7	4.1	2.6	30.1	0.24	21	185.4	29	2	0.167099	92.7792	0.0971509	24.9	0.290481
8	10.32	175	944.6	950.8	947.7	4.1	2.6	30.1	0.24	21	185.4	29	2	0.167099	92.7792	0.0971509	24.9	0.407062
9	10.32	175	944.6	950.8	947.7	4.1	2.6	30.1	0.24	21	185.4	29	2	0.167099	92.7792	0.0971509	24.9	0.478954
10	10.32	175	944.6	950.8	947.7	4.1	2.6	30.1	0.24	21	185.4	29	2	0.167099	92.7792	0.0971509	24.9	0.266193
11	10.32	175	944.6	950.8	947.7	4.1	2.6	30.1	0.24	21	185.4	29	2	0.167099	92.7792	0.0971509	24.9	0.24482
12	10.32	175	944.6	950.8	947.7	4.1	2.6	30.1	0.24	21	185.4	29	2	0.167099	92.7792	0.0971509	24.9	0.303111
2	10.62	150	847.3	850.4	848.85	2.6	1.3	29.6	0.793	25	195.22	33	2	0.288481	92.5389	0.140039	25.02	0.306686
3	10.62	150	847.3	850.4	848.85	2.6	1.3	29.6	0.793	25	195.22	33	2	0.288481	92.5389	0.140039	25.02	0.376706
4	10.62	150	847.3	850.4	848.85	2.6	1.3	29.6	0.793	25	195.22	33	2	0.288481	92.5389	0.140039	25.02	0.145641
5	10.62	150	847.3	850.4	848.85	2.6	1.3	29.6	0.793	25	195.22	33	2	0.288481	92.5389	0.140039	25.02	0.046213
2	10.62	150	851.7	866.9	859.3	12.7	6.1	28.3	1.021	25	175.17	29	2	1.74284	92.5389	0.846037	25	1.85282
3	10.62	150	851.7	866.9	859.3	12.7	6.1	28.3	1.021	25	175.17	29	2	1.74284	92.5389	0.846037	25	2.27584
4	10.62	150	851.7	866.9	859.3	12.7	6.1	28.3	1.021	25	175.17	29	2	1.74284	92.5389	0.846037	25	0.879878
5	10.62	150	851.7	866.9	859.3	12.7	6.1	28.3	1.021	25	175.17	29	2	1.74284	92.5389	0.846037	25	0.279192
1	10.26	150	845.6	852.3	848.95	4.9	1.4	31.2	1.051	27	226.04	37	2	0.327807	96.7221	0.252159	25	0.327807
2	10.26	150	845.6	852.3	848.95	4.9	1.4	31.2	1.051	27	226.04	37	2	0.327807	96.7221	0.252159	25	0.448844
3	10.26	150	845.6	852.3	848.95	4.9	1.4	31.2	1.051	27	226.04	37	2	0.327807	96.7221	0.252159	25	0.166425
4	10.26	150	845.6	852.3	848.95	4.9	1.4	31.2	1.051	27	226.04	37	2	0.327807	96.7221	0.252159	25	0.224422
5	10.26	150	845.6	852.3	848.95	4.9	1.4	31.2	1.051	27	226.04	37	2	0.327807	96.7221	0.252159	25	0.378239
6	10.26	150	845.6	852.3	848.95	4.9	1.4	31.2	1.051	27	226.04	37	2	0.327807	96.7221	0.252159	25	0.41102
7	10.26	150	845.6	852.3	848.95	4.9	1.4	31.2	1.051	27	226.04	37	2	0.327807	96.7221	0.252159	25	0.456408
8	10.26	150	845.6	852.3	848.95	4.9	1.4	31.2	1.051	27	226.04	37	2	0.327807	96.7221	0.252159	25	0.842212
9	10.26	150	845.6	852.3	848.95	4.9	1.4	31.2	1.051	27	226.04	37	2	0.327807	96.7221	0.252159	25	0.79178
10	10.26	150	845.6	852.3	848.95	4.9	1.4	31.2	1.051	27	226.04	37	2	0.327807	96.7221	0.252159	25	1.11707
11	10.26	150	845.6	852.3	848.95	4.9	1.4	31.2	1.051	27	226.04	37	2	0.327807	96.7221	0.252159	25	0.9809
12	10.26	150	845.6	852.3	848.95	4.9	1.4	31.2	1.051	27	226.04	37	2	0.327807	96.7221	0.252159	25	1.08681
1	10.26	150	863	873	868	7.1	4.2	31.6	1.039	27	202.8	33	2	0.972193	96.7221	0.747841	25	0.972193
2	10.26	150	863	873	868	7.1	4.2	31.6	1.039	27	202.8	33	2	0.972193	96.7221	0.747841	25	1.33116
3	10.26	150	863	873	868	7.1	4.2	31.6	1.039	27	202.8	33	2	0.972193	96.7221	0.747841	25	0.493575
4	10.26	150	863	873	868	7.1	4.2	31.6	1.039	27	202.8	33	2	0.972193	96.7221	0.747841	25	0.665578
5	10.26	150	863	873	868	7.1	4.2	31.6	1.039	27	202.8	33	2	0.972193	96.7221	0.747841	25	1.12176
6	10.26	150	863	873	868	7.1	4.2	31.6	1.039	27	202.8	33	2	0.972193	96.7221	0.747841	25	1.21898
7	10.26	150	863	873	868	7.1	4.2	31.6	1.039	27	202.8	33	2	0.972193	96.7221	0.747841	25	1.35359
8	10.26	150	863	873	868	7.1	4.2	31.6	1.039	27	202.8	33	2	0.972193	96.7221	0.747841	25	2.49779
9	10.26	150	863	873	868	7.1	4.2	31.6	1.039	27	202.8	33	2	0.972193	96.7221	0.747841	25	2.34822
10	10.26	150	863	873	868	7.1	4.2	31.6	1.039	27	202.8	33	2	0.972193	96.7221	0.747841	25	3.31293
11	10.26	150	863	873	868	7.1	4.2	31.6	1.039	27	202.8	33	2	0.972193	96.7221	0.747841	25	2.9091
12	10.26	150	863	873	868	7.1	4.2	31.6	1.039	27	202.8	33	2	0.972193	96.7221	0.747841	25	3.22319
1	7.79	150	871.8	875.1	873.45	2.7	2.6	30.5	0.607	27	185.84	29	2	0.780502	95.4077	0.417381	25	3.07192
2	7.79	150	871.8	875.1	873.45	2.7	2.6	30.5	0.607	27	185.84	29	2	0.780502	95.4077	0.417381	25	2.8048
3	7.79	150	871.8	875.1	873.45	2.7	2.6	30.5	0.607	27	185.84	29	2	0.780502	95.4077	0.417381	25	1.26466
4	7.79	150	871.8	875.1	873.45	2.7	2.6	30.5	0.607	27	185.84	29	2	0.780502	95.4077	0.417381	25	1.06432
5	7.79	150	871.8	875.1	873.45	2.7	2.6	30.5	0.607	27	185.84	29	2	0.780502	95.4077	0.417381	25	1.85317
6	7.79	150	871.8	875.1	873.45	2.7	2.6	30.5	0.607	27	185.84	29	2	0.780502	95.4077	0.417381	25	1.0518
7	7.79	150	871.8	875.1	873.45	2.7	2.6	30.5	0.607	27	185.84	29	2	0.780502	95.4077	0.417381	25	1.44831
8	7.79	150	871.8	875.1	873.45	2.7	2.6	30.5	0.607	27	185.84	29	2	0.780502	95.4077	0.417381	25	1.92413
9	7.79	150	871.8	875.1	873.45	2.7	2.6	30.5	0.607	27	185.84	29	2	0.780502	95.4077	0.417381	25	2.72967
10	7.79	150	871.8	875.1	873.45	2.7	2.6	30.5	0.607	27	185.84	29	2	0.780502	95.4077	0.417381	25	1.98256
11	7.79	150	871.8	875.1	873.45	2.7	2.6	30.5	0.607	27	185.84	29	2	0.780502	95.4077	0.417381	25	1.62361
1	10.26	150	881.1	893.9	887.5	9.2	5.3	32.4	1.043	23	226.04	37	2	1.20602	96.2179	0.964814	25	16.3632
2	10.26	150	881.1	893.9	887.5	9.2	5.3	32.4	1.043	23	226.04	37	2	1.20602	96.2179	0.964814	25	18.8139
3	10.26	150	881.1	893.9	887.5	9.2	5.3	32.4	1.043	23	226.04	37	2	1.20602	96.2179	0.964814	25	20.29
4	10.26	150	881.1	893.9	887.5	9.2	5.3	32.4	1.043	23	226.04	37	2	1.20602	96.2179	0.964814	25	16.1413
5	10.26	150	881.1	893.9	887.5	9.2	5.3	32.4	1.043	23	226.04	37	2	1.20602	96.2179	0.964814	25	14.9546
6	10.26	150	881.1	893.9	887.5	9.2	5.3	32.4	1.043	23	226.04	37	2	1.20602	96.2179	0.964814	25	13.7389
7	10.26	150	881.1	893.9	887.5	9.2	5.3	32.4	1.043	23	226.04	37	2	1.20602	96.2179	0.964814	25	8.90523
8	10.26	150	881.1	893.9	887.5	9.2	5.3	32.4	1.043	23	226.04	37	2	1.20602	96.2179	0.964814	25	9.5806
9	10.26	150	881.1	893.9	887.5	9.2	5.3	32.4	1.043	23	226.04	37	2	1.20602	96.2179	0.964814	25	6.68616
10	10.26	150	881.1	893.9	887.5	9.2	5.3	32.4	1.043	23	226.04	37	2	1.20602	96.2179	0.964814	25	4.81442
11	10.26	150	881.1	893.9	887.5	9.2	5.3	32.4	1.043	23	226.04	37	2	1.20602	96.2179	0.964814	25	5.91431
12	10.26	150	881.1	893.9	887.5	9.2	5.3	32.4	1.043	23	226.04	37	2	1.20602	96.2179	0.964814	25	5.68275
1	10.26	150	896.9	901.2	899.05	3.6	0.8	29.7	0.252	25	226.6	37	2	0.0439829	96.2179	0.0351863	25	0.59676
2	10.26	150	896.9	901.2	899.05	3.6	0.8	29.7	0.252	25	226.6	37	2	0.0439829	96.2179	0.0351863	25	0.686133
3	10.26	150	896.9	901.2	899.05	3.6	0.8	29.7	0.252	25	226.6	37	2	0.0439829	96.2179	0.0351863	25	0.739968
4	10.26	150	896.9	901.2	899.05	3.6	0.8	29.7	0.252	25	226.6	37	2	0.0439829	96.2179	0.0351863	25	0.588667
5	10.26	150	896.9	901.2	899.05	3.6	0.8	29.7	0.252	25	226.6	37	2	0.0439829	96.2179	0.0351863	25	0.545388
6	10.26	150	896.9	901.2	899.05	3.6	0.8	29.7	0.252	25	226.6	37	2	0.0439829	96.2179	0.0351863	25	0.501053
7	10.26	150	896.9	901.2	899.05	3.6	0.8	29.7	0.252	25	226.6	37	2	0.0439829	96.2179	0.0351863	25	0.32477
8	10.26	150	896.9	901.2	899.05	3.6	0.8	29.7	0.252	25	226.6	37	2	0.0439829	96.2179	0.0351863	25	0.3494
9	10.26	150	896.9	901.2	899.05	3.6	0.8	29.7	0.252	25	226.6	37	2	0.0439829	96.2179	0.0351863	25	0.243841
10	10.26	150	896.9	901.2	899.05	3.6	0.8	29.7	0.252	25	226.6	37	2	0.0439829	96.2179	0.0351863	25	0.17558
11	10.26	150	896.9	901.2	899.05	3.6	0.8	29.7	0.252	25	226.6	37	2	0.0439829	96.2179	0.0351863	25	0.215692
12	10.26	150	896.9	901.2	899.05	3.6	0.8	29.7	0.252	25	226.6	37	2	0.0439829	96.2179	0.0351863	25	0.207247
1	8.08	125	870.2	874	872.1	2.6	0.2	26.7	0.19	30	283.56	47	2	0.0130515	65.5629	0.00627477	25.01	0.0176321
2	8.08	125	870.2	874	872.1	2.6	0.2	26.7	0.19	30	283.56	47	2	0.0130515	65.5629	0.00627477	25.01	0.0111063
3	8.08	125	870.2	874	872.1	2.6	0.2	26.7	0.19	30	283.56	47	2	0.0130515	65.5629	0.00627477	25.01	0.00501982
4	8.08	125	870.2	874	872.1	2.6	0.2	26.7	0.19	30	283.56	47	2	0.0130515	65.5629	0.00627477	25.01	0.00458058
5	8.08	125	870.2	874	872.1	2.6	0.2	26.7	0.19	30	283.56	47	2	0.0130515	65.5629	0.00627477	25.01	0.00445509
1	8.08	125	866.2	871.8	869	2.8	1.6	30.4	0.402	0	140.84	29	2	0.293041	90.8337	0.126311	24.95	0.837441
2	8.08	125	866.2	871.8	869	2.8	1.6	30.4	0.402	0	140.84	29	2	0.293041	90.8337	0.126311	24.95	0.605029
3	8.08	125	866.2	871.8	869	2.8	1.6	30.4	0.402	0	140.84	29	2	0.293041	90.8337	0.126311	24.95	0.592398
4	8.08	125	866.2	871.8	869	2.8	1.6	30.4	0.402	0	140.84	29	2	0.293041	90.8337	0.126311	24.95	0.510296
5	8.08	125	866.2	871.8	869	2.8	1.6	30.4	0.402	0	140.84	29	2	0.293041	90.8337	0.126311	24.95	0.438299
6	8.08	125	866.2	871.8	869	2.8	1.6	30.4	0.402	0	140.84	29	2	0.293041	90.8337	0.126311	24.95	0.28041
7	8.08	125	866.2	871.8	869	2.8	1.6	30.4	0.402	0	140.84	29	2	0.293041	90.8337	0.126311	24.95	0.284199
8	8.08	125	866.2	871.8	869	2.8	1.6	30.4	0.402	0	140.84	29	2	0.293041	90.8337	0.126311	24.95	0.271568
9	8.08	125	866.2	871.8	869	2.8	1.6	30.4	0.402	0	140.84	29	2	0.293041	90.8337	0.126311	24.95	0.0884176
10	8.08	125	866.2	871.8	869	2.8	1.6	30.4	0.402	0	140.84	29	2	0.293041	90.8337	0.126311	24.95	0.0315777
1	8.08	125	874.2	880.8	877.5	6	5.2	31.2	0.47	0	131.32	27	2	1.11348	90.8337	0.47995	25	3.18207
2	8.08	125	874.2	880.8	877.5	6	5.2	31.2	0.47	0	131.32	27	2	1.11348	90.8337	0.47995	25	2.29896
3	8.08	125	874.2	880.8	877.5	6	5.2	31.2	0.47	0	131.32	27	2	1.11348	90.8337	0.47995	25	2.25096
4	8.08	125	874.2	880.8	877.5	6	5.2	31.2	0.47	0	131.32	27	2	1.11348	90.8337	0.47995	25	1.939
5	8.08	125	874.2	880.8	877.5	6	5.2	31.2	0.47	0	131.32	27	2	1.11348	90.8337	0.47995	25	1.66543
6	8.08	125	874.2	880.8	877.5	6	5.2	31.2	0.47	0	131.32	27	2	1.11348	90.8337	0.47995	25	1.06549
7	8.08	125	874.2	880.8	877.5	6	5.2	31.2	0.47	0	131.32	27	2	1.11348	90.8337	0.47995	25	1.07989
8	8.08	125	874.2	880.8	877.5	6	5.2	31.2	0.47	0	131.32	27	2	1.11348	90.8337	0.47995	25	1.03189
9	8.08	125	874.2	880.8	877.5	6	5.2	31.2	0.47	0	131.32	27	2	1.11348	90.8337	0.47995	25	0.335965
10	8.08	125	874.2	880.8	877.5	6	5.2	31.2	0.47	0	131.32	27	2	1.11348	90.8337	0.47995	25	0.119987
1	8.08	125	889	897.9	893.45	7.3	5	29.5	0.401	0	156.6	33	2	0.913476	90.8337	0.393739	25.07	2.61049
2	8.08	125	889	897.9	893.45	7.3	5	29.5	0.401	0	156.6	33	2	0.913476	90.8337	0.393739	25.07	1.88601
3	8.08	125	889	897.9	893.45	7.3	5	29.5	0.401	0	156.6	33	2	0.913476	90.8337	0.393739	25.07	1.84664
4	8.08	125	889	897.9	893.45	7.3	5	29.5	0.401	0	156.6	33	2	0.913476	90.8337	0.393739	25.07	1.59071
5	8.08	125	889	897.9	893.45	7.3	5	29.5	0.401	0	156.6	33	2	0.913476	90.8337	0.393739	25.07	1.36628
6	8.08	125	889	897.9	893.45	7.3	5	29.5	0.401	0	156.6	33	2	0.913476	90.8337	0.393739	25.07	0.874102
7	8.08	125	889	897.9	893.45	7.3	5	29.5	0.401	0	156.6	33	2	0.913476	90.8337	0.393739	25.07	0.885914
8	8.08	125	889	897.9	893.45	7.3	5	29.5	0.401	0	156.6	33	2	0.913476	90.8337	0.393739	25.07	0.84654
9	8.08	125	889	897.9	893.45	7.3	5	29.5	0.401	0	156.6	33	2	0.913476	90.8337	0.393739	25.07	0.275618
10	8.08	125	889	897.9	893.45	7.3	5	29.5	0.401	0	156.6	33	2	0.913476	90.8337	0.393739	25.07	0.0984349
1	8.08	125	865.5	868.2	866.85	0.8	0.2	26.7	0.087	29	165.2	29	2	0.0523791	83.6803	0.013362	25	0.0847151
2	8.08	125	865.5	868.2	866.85	0.8	0.2	26.7	0.087	29	165.2	29	2	0.0523791	83.6803	0.013362	25	0.0856504
3	8.08	125	865.5	868.2	866.85	0.8	0.2	26.7	0.087	29	165.2	29	2	0.0523791	83.6803	0.013362	25	0.105159
4	8.08	125	865.5	868.2	866.85	0.8	0.2	26.7	0.087	29	165.2	29	2	0.0523791	83.6803	0.013362	25	0.0825772
5	8.08	125	865.5	868.2	866.85	0.8	0.2	26.7	0.087	29	165.2	29	2	0.0523791	83.6803	0.013362	25	0.0167025
1	8.08	125	883.2	887.5	885.35	3.9	2.1	27.6	0.224	24	190.4	33	2	1.41604	83.6803	0.361235	25.02	2.29023
2	8.08	125	883.2	887.5	885.35	3.9	2.1	27.6	0.224	24	190.4	33	2	1.41604	83.6803	0.361235	25.02	2.31552
3	8.08	125	883.2	887.5	885.35	3.9	2.1	27.6	0.224	24	190.4	33	2	1.41604	83.6803	0.361235	25.02	2.84292
4	8.08	125	883.2	887.5	885.35	3.9	2.1	27.6	0.224	24	190.4	33	2	1.41604	83.6803	0.361235	25.02	2.23243
5	8.08	125	883.2	887.5	885.35	3.9	2.1	27.6	0.224	24	190.4	33	2	1.41604	83.6803	0.361235	25.02	0.451544
1	10.26	150	871.7	875.7	873.7	3.5	2.6	31.7	0.959	33	178.3	27	2	0.870175	92.8657	0.367162	25	1.60083
2	10.26	150	871.7	875.7	873.7	3.5	2.6	31.7	0.959	33	178.3	27	2	0.870175	92.8657	0.367162	25	0.917906
3	10.26	150	871.7	875.7	873.7	3.5	2.6	31.7	0.959	33	178.3	27	2	0.870175	92.8657	0.367162	25	1.27038
4	10.26	150	871.7	875.7	873.7	3.5	2.6	31.7	0.959	33	178.3	27	2	0.870175	92.8657	0.367162	25	2.01572
5	10.26	150	871.7	875.7	873.7	3.5	2.6	31.7	0.959	33	178.3	27	2	0.870175	92.8657	0.367162	25	2.62154
6	10.26	150	871.7	875.7	873.7	3.5	2.6	31.7	0.959	33	178.3	27	2	0.870175	92.8657	0.367162	25	3.66061
7	10.26	150	871.7	875.7	873.7	3.5	2.6	31.7	0.959	33	178.3	27	2	0.870175	92.8657	0.367162	25	3.88825
8	10.26	150	871.7	875.7	873.7	3.5	2.6	31.7	0.959	33	178.3	27	2	0.870175	92.8657	0.367162	25	3.46968
9	10.26	150	871.7	875.7	873.7	3.5	2.6	31.7	0.959	33	178.3	27	2	0.870175	92.8657	0.367162	25	1.52372
10	10.26	150	871.7	875.7	873.7	3.5	2.6	31.7	0.959	33	178.3	27	2	0.870175	92.8657	0.367162	25	1.0354
11	10.26	150	871.7	875.7	873.7	3.5	2.6	31.7	0.959	33	178.3	27	2	0.870175	92.8657	0.367162	25	0.444267
1	10.26	150	892.6	896.5	894.55	3.2	1.8	31.6	0.894	30	189.78	29	2	0.561597	92.8657	0.236961	25.1	1.03315
2	10.26	150	892.6	896.5	894.55	3.2	1.8	31.6	0.894	30	189.78	29	2	0.561597	92.8657	0.236961	25.1	0.592402
3	10.26	150	892.6	896.5	894.55	3.2	1.8	31.6	0.894	30	189.78	29	2	0.561597	92.8657	0.236961	25.1	0.819884
4	10.26	150	892.6	896.5	894.55	3.2	1.8	31.6	0.894	30	189.78	29	2	0.561597	92.8657	0.236961	25.1	1.30091
5	10.26	150	892.6	896.5	894.55	3.2	1.8	31.6	0.894	30	189.78	29	2	0.561597	92.8657	0.236961	25.1	1.6919
6	10.26	150	892.6	896.5	894.55	3.2	1.8	31.6	0.894	30	189.78	29	2	0.561597	92.8657	0.236961	25.1	2.3625
7	10.26	150	892.6	896.5	894.55	3.2	1.8	31.6	0.894	30	189.78	29	2	0.561597	92.8657	0.236961	25.1	2.50941
8	10.26	150	892.6	896.5	894.55	3.2	1.8	31.6	0.894	30	189.78	29	2	0.561597	92.8657	0.236961	25.1	2.23928
9	10.26	150	892.6	896.5	894.55	3.2	1.8	31.6	0.894	30	189.78	29	2	0.561597	92.8657	0.236961	25.1	0.983387
10	10.26	150	892.6	896.5	894.55	3.2	1.8	31.6	0.894	30	189.78	29	2	0.561597	92.8657	0.236961	25.1	0.668229
11	10.26	150	892.6	896.5	894.55	3.2	1.8	31.6	0.894	30	189.78	29	2	0.561597	92.8657	0.236961	25.1	0.286722
1	10.26	150	869.7	874.7	872.2	3.8	1.7	28.7	0.441	28	223.24	37	2	1.21874	94.5819	0.883143	25	9.19352
2	10.26	150	869.7	874.7	872.2	3.8	1.7	28.7	0.441	28	223.24	37	2	1.21874	94.5819	0.883143	25	11.79
3	10.26	150	869.7	874.7	872.2	3.8	1.7	28.7	0.441	28	223.24	37	2	1.21874	94.5819	0.883143	25	13.5209
4	10.26	150	869.7	874.7	872.2	3.8	1.7	28.7	0.441	28	223.24	37	2	1.21874	94.5819	0.883143	25	15.4903
5	10.26	150	869.7	874.7	872.2	3.8	1.7	28.7	0.441	28	223.24	37	2	1.21874	94.5819	0.883143	25	13.362
6	10.26	150	869.7	874.7	872.2	3.8	1.7	28.7	0.441	28	223.24	37	2	1.21874	94.5819	0.883143	25	8.35453
7	10.26	150	869.7	874.7	872.2	3.8	1.7	28.7	0.441	28	223.24	37	2	1.21874	94.5819	0.883143	25	11.3307
8	10.26	150	869.7	874.7	872.2	3.8	1.7	28.7	0.441	28	223.24	37	2	1.21874	94.5819	0.883143	25	11.7988
9	10.26	150	869.7	874.7	872.2	3.8	1.7	28.7	0.441	28	223.24	37	2	1.21874	94.5819	0.883143	25	10.5094
10	10.26	150	869.7	874.7	872.2	3.8	1.7	28.7	0.441	28	223.24	37	2	1.21874	94.5819	0.883143	25	8.02777
11	10.26	150	869.7	874.7	872.2	3.8	1.7	28.7	0.441	28	223.24	37	2	1.21874	94.5819	0.883143	25	5.16639
12	10.26	150	869.7	874.7	872.2	3.8	1.7	28.7	0.441	28	223.24	37	2	1.21874	94.5819	0.883143	25	4.96326
1	10.26	150	877.7	880.2	878.95	2	0.8	28.4	0.124	25	177.04	29	2	0.161263	94.5819	0.116857	25	1.21648
2	10.26	150	877.7	880.2	878.95	2	0.8	28.4	0.124	25	177.04	29	2	0.161263	94.5819	0.116857	25	1.56004
3	10.26	150	877.7	880.2	878.95	2	0.8	28.4	0.124	25	177.04	29	2	0.161263	94.5819	0.116857	25	1.78908
4	10.26	150	877.7	880.2	878.95	2	0.8	28.4	0.124	25	177.04	29	2	0.161263	94.5819	0.116857	25	2.04967
5	10.26	150	877.7	880.2	878.95	2	0.8	28.4	0.124	25	177.04	29	2	0.161263	94.5819	0.116857	25	1.76805
6	10.26	150	877.7	880.2	878.95	2	0.8	28.4	0.124	25	177.04	29	2	0.161263	94.5819	0.116857	25	1.10547
7	10.26	150	877.7	880.2	878.95	2	0.8	28.4	0.124	25	177.04	29	2	0.161263	94.5819	0.116857	25	1.49928
8	10.26	150	877.7	880.2	878.95	2	0.8	28.4	0.124	25	177.04	29	2	0.161263	94.5819	0.116857	25	1.56121
9	10.26	150	877.7	880.2	878.95	2	0.8	28.4	0.124	25	177.04	29	2	0.161263	94.5819	0.116857	25	1.3906
10	10.26	150	877.7	880.2	878.95	2	0.8	28.4	0.124	25	177.04	29	2	0.161263	94.5819	0.116857	25	1.06223
11	10.26	150	877.7	880.2	878.95	2	0.8	28.4	0.124	25	177.04	29	2	0.161263	94.5819	0.116857	25	0.683614
12	10.26	150	877.7	880.2	878.95	2	0.8	28.4	0.124	25	177.04	29	2	0.161263	94.5819	0.116857	25	0.656737
1	10.26	150	889.7	895.3	892.5	4.2	0.8	27.6	0.205	24	225.04	37	2	0.281192	94.2475	0.284032	24.9	1.26678
2	10.26	150	889.7	895.3	892.5	4.2	0.8	27.6	0.205	24	225.04	37	2	0.281192	94.2475	0.284032	24.9	0.690197
3	10.26	150	889.7	895.3	892.5	4.2	0.8	27.6	0.205	24	225.04	37	2	0.281192	94.2475	0.284032	24.9	0.579425
4	10.26	150	889.7	895.3	892.5	4.2	0.8	27.6	0.205	24	225.04	37	2	0.281192	94.2475	0.284032	24.9	0.778247
5	10.26	150	889.7	895.3	892.5	4.2	0.8	27.6	0.205	24	225.04	37	2	0.281192	94.2475	0.284032	24.9	0.525459
6	10.26	150	889.7	895.3	892.5	4.2	0.8	27.6	0.205	24	225.04	37	2	0.281192	94.2475	0.284032	24.9	0.528299
7	10.26	150	889.7	895.3	892.5	4.2	0.8	27.6	0.205	24	225.04	37	2	0.281192	94.2475	0.284032	24.9	0.809491
8	10.26	150	889.7	895.3	892.5	4.2	0.8	27.6	0.205	24	225.04	37	2	0.281192	94.2475	0.284032	24.9	1.04808
9	10.26	150	889.7	895.3	892.5	4.2	0.8	27.6	0.205	24	225.04	37	2	0.281192	94.2475	0.284032	24.9	0.658954
10	10.26	150	889.7	895.3	892.5	4.2	0.8	27.6	0.205	24	225.04	37	2	0.281192	94.2475	0.284032	24.9	0.738483
11	10.26	150	889.7	895.3	892.5	4.2	0.8	27.6	0.205	24	225.04	37	2	0.281192	94.2475	0.284032	24.9	0.44593
12	10.26	150	889.7	895.3	892.5	4.2	0.8	27.6	0.205	24	225.04	37	2	0.281192	94.2475	0.284032	24.9	0.633391
1	10.26	150	898.7	901	899.85	1.8	0.4	26.2	0.076	24	178.56	29	2	0.0521233	94.2475	0.0526498	24.88	0.234818
2	10.26	150	898.7	901	899.85	1.8	0.4	26.2	0.076	24	178.56	29	2	0.0521233	94.2475	0.0526498	24.88	0.127939
3	10.26	150	898.7	901	899.85	1.8	0.4	26.2	0.076	24	178.56	29	2	0.0521233	94.2475	0.0526498	24.88	0.107406
4	10.26	150	898.7	901	899.85	1.8	0.4	26.2	0.076	24	178.56	29	2	0.0521233	94.2475	0.0526498	24.88	0.14426
5	10.26	150	898.7	901	899.85	1.8	0.4	26.2	0.076	24	178.56	29	2	0.0521233	94.2475	0.0526498	24.88	0.0974021
6	10.26	150	898.7	901	899.85	1.8	0.4	26.2	0.076	24	178.56	29	2	0.0521233	94.2475	0.0526498	24.88	0.0979286
7	10.26	150	898.7	901	899.85	1.8	0.4	26.2	0.076	24	178.56	29	2	0.0521233	94.2475	0.0526498	24.88	0.150052
8	10.26	150	898.7	901	899.85	1.8	0.4	26.2	0.076	24	178.56	29	2	0.0521233	94.2475	0.0526498	24.88	0.194278
9	10.26	150	898.7	901	899.85	1.8	0.4	26.2	0.076	24	178.56	29	2	0.0521233	94.2475	0.0526498	24.88	0.122148
10	10.26	150	898.7	901	899.85	1.8	0.4	26.2	0.076	24	178.56	29	2	0.0521233	94.2475	0.0526498	24.88	0.13689
11	10.26	150	898.7	901	899.85	1.8	0.4	26.2	0.076	24	178.56	29	2	0.0521233	94.2475	0.0526498	24.88	0.0826602
12	10.26	150	898.7	901	899.85	1.8	0.4	26.2	0.076	24	178.56	29	2	0.0521233	94.2475	0.0526498	24.88	0.117409
1	10.26	150	907.4	910.6	909	2.3	0.5	27.4	0.126	24	143.28	23	2	0.108019	94.2475	0.10911	25.05	0.48663
2	10.26	150	907.4	910.6	909	2.3	0.5	27.4	0.126	24	143.28	23	2	0.108019	94.2475	0.10911	25.05	0.265137
3	10.26	150	907.4	910.6	909	2.3	0.5	27.4	0.126	24	143.28	23	2	0.108019	94.2475	0.10911	25.05	0.222584
4	10.26	150	907.4	910.6	909	2.3	0.5	27.4	0.126	24	143.28	23	2	0.108019	94.2475	0.10911	25.05	0.298961
5	10.26	150	907.4	910.6	909	2.3	0.5	27.4	0.126	24	143.28	23	2	0.108019	94.2475	0.10911	25.05	0.201853
6	10.26	150	907.4	910.6	909	2.3	0.5	27.4	0.126	24	143.28	23	2	0.108019	94.2475	0.10911	25.05	0.202944
7	10.26	150	907.4	910.6	909	2.3	0.5	27.4	0.126	24	143.28	23	2	0.108019	94.2475	0.10911	25.05	0.310963
8	10.26	150	907.4	910.6	909	2.3	0.5	27.4	0.126	24	143.28	23	2	0.108019	94.2475	0.10911	25.05	0.402615
9	10.26	150	907.4	910.6	909	2.3	0.5	27.4	0.126	24	143.28	23	2	0.108019	94.2475	0.10911	25.05	0.253135
10	10.26	150	907.4	910.6	909	2.3	0.5	27.4	0.126	24	143.28	23	2	0.108019	94.2475	0.10911	25.05	0.283685
11	10.26	150	907.4	910.6	909	2.3	0.5	27.4	0.126	24	143.28	23	2	0.108019	94.2475	0.10911	25.05	0.171302
12	10.26	150	907.4	910.6	909	2.3	0.5	27.4	0.126	24	143.28	23	2	0.108019	94.2475	0.10911	25.05	0.243315
1	10.26	150	951.9	955.5	953.7	3.2	3.1	30.6	0.652	25	166.4	27	2	0.0780095	98.4453	0.251643	25.06	0.530968
2	10.26	150	951.9	955.5	953.7	3.2	3.1	30.6	0.652	25	166.4	27	2	0.0780095	98.4453	0.251643	25.06	0.312038
3	10.26	150	951.9	955.5	953.7	3.2	3.1	30.6	0.652	25	166.4	27	2	0.0780095	98.4453	0.251643	25.06	0.372432
4	10.26	150	951.9	955.5	953.7	3.2	3.1	30.6	0.652	25	166.4	27	2	0.0780095	98.4453	0.251643	25.06	0.523418
5	10.26	150	951.9	955.5	953.7	3.2	3.1	30.6	0.652	25	166.4	27	2	0.0780095	98.4453	0.251643	25.06	0.619043
6	10.26	150	951.9	955.5	953.7	3.2	3.1	30.6	0.652	25	166.4	27	2	0.0780095	98.4453	0.251643	25.06	0.528451
7	10.26	150	951.9	955.5	953.7	3.2	3.1	30.6	0.652	25	166.4	27	2	0.0780095	98.4453	0.251643	25.06	0.951212
8	10.26	150	951.9	955.5	953.7	3.2	3.1	30.6	0.652	25	166.4	27	2	0.0780095	98.4453	0.251643	25.06	1.31358
9	10.26	150	951.9	955.5	953.7	3.2	3.1	30.6	0.652	25	166.4	27	2	0.0780095	98.4453	0.251643	25.06	1.64826
10	10.26	150	951.9	955.5	953.7	3.2	3.1	30.6	0.652	25	166.4	27	2	0.0780095	98.4453	0.251643	25.06	1.7766
11	10.26	150	951.9	955.5	953.7	3.2	3.1	30.6	0.652	25	166.4	27	2	0.0780095	98.4453	0.251643	25.06	1.8521
12	10.26	150	951.9	955.5	953.7	3.2	3.1	30.6	0.652	25	166.4	27	2	0.0780095	98.4453	0.251643	25.06	1.54509
1	10.06	175	918.8	929.3	924.05	6	1.6	27.4	0.313	28	296.26	49	2	0.150618	96.1971	0.089123	24.91	0.663966
2	10.06	175	918.8	929.3	924.05	6	1.6	27.4	0.313	28	296.26	49	2	0.150618	96.1971	0.089123	24.91	1.34754
3	10.06	175	918.8	929.3	924.05	6	1.6	27.4	0.313	28	296.26	49	2	0.150618	96.1971	0.089123	24.91	1.34932
4	10.06	175	918.8	929.3	924.05	6	1.6	27.4	0.313	28	296.26	49	2	0.150618	96.1971	0.089123	24.91	1.06413
5	10.06	175	918.8	929.3	924.05	6	1.6	27.4	0.313	28	296.26	49	2	0.150618	96.1971	0.089123	24.91	0.934009
6	10.06	175	918.8	929.3	924.05	6	1.6	27.4	0.313	28	296.26	49	2	0.150618	96.1971	0.089123	24.91	0.759328
7	10.06	175	918.8	929.3	924.05	6	1.6	27.4	0.313	28	296.26	49	2	0.150618	96.1971	0.089123	24.91	0.524043
8	10.06	175	918.8	929.3	924.05	6	1.6	27.4	0.313	28	296.26	49	2	0.150618	96.1971	0.089123	24.91	0.530282
9	10.06	175	918.8	929.3	924.05	6	1.6	27.4	0.313	28	296.26	49	2	0.150618	96.1971	0.089123	24.91	0.387685
10	10.06	175	918.8	929.3	924.05	6	1.6	27.4	0.313	28	296.26	49	2	0.150618	96.1971	0.089123	24.91	0.356492
11	10.06	175	918.8	929.3	924.05	6	1.6	27.4	0.313	28	296.26	49	2	0.150618	96.1971	0.089123	24.91	0.277173
12	10.06	175	918.8	929.3	924.05	6	1.6	27.4	0.313	28	296.26	49	2	0.150618	96.1971	0.089123	24.91	0.195179
1	9.48	125	940.7	944	942.35	2.8	1	27.7	0.19	29	190.12	29	2	0.240926	87.9238	0.0442066	25	0.0680782
2	9.48	125	940.7	944	942.35	2.8	1	27.7	0.19	29	190.12	29	2	0.240926	87.9238	0.0442066	25	0.0751512
3	9.48	125	940.7	944	942.35	2.8	1	27.7	0.19	29	190.12	29	2	0.240926	87.9238	0.0442066	25	0.190088
4	9.48	125	940.7	944	942.35	2.8	1	27.7	0.19	29	190.12	29	2	0.240926	87.9238	0.0442066	25	0.161796
5	9.48	125	940.7	944	942.35	2.8	1	27.7	0.19	29	190.12	29	2	0.240926	87.9238	0.0442066	25	0.125989
6	9.48	125	940.7	944	942.35	2.8	1	27.7	0.19	29	190.12	29	2	0.240926	87.9238	0.0442066	25	0.130852
7	9.48	125	940.7	944	942.35	2.8	1	27.7	0.19	29	190.12	29	2	0.240926	87.9238	0.0442066	25	0.174174
8	9.48	125	940.7	944	942.35	2.8	1	27.7	0.19	29	190.12	29	2	0.240926	87.9238	0.0442066	25	0.131294
9	9.48	125	940.7	944	942.35	2.8	1	27.7	0.19	29	190.12	29	2	0.240926	87.9238	0.0442066	25	0.159144
10	9.48	125	940.7	944	942.35	2.8	1	27.7	0.19	29	190.12	29	2	0.240926	87.9238	0.0442066	25	0.127315
11	9.48	125	940.7	944	942.35	2.8	1	27.7	0.19	29	190.12	29	2	0.240926	87.9238	0.0442066	25	0.121126
1	10.26	150	968.7	972.2	970.45	1.7	0.7	28.4	0.105	27	113.55	17	2	0.00268638	97.6567	0.0062474	25.1	0.021616
2	10.26	150	968.7	972.2	970.45	1.7	0.7	28.4	0.105	27	113.55	17	2	0.00268638	97.6567	0.0062474	25.1	0.0206789
3	10.26	150	968.7	972.2	970.45	1.7	0.7	28.4	0.105	27	113.55	17	2	0.00268638	97.6567	0.0062474	25.1	0.0143065
4	10.26	150	968.7	972.2	970.45	1.7	0.7	28.4	0.105	27	113.55	17	2	0.00268638	97.6567	0.0062474	25.1	0.0118701
5	10.26	150	968.7	972.2	970.45	1.7	0.7	28.4	0.105	27	113.55	17	2	0.00268638	97.6567	0.0062474	25.1	0.015681
6	10.26	150	968.7	972.2	970.45	1.7	0.7	28.4	0.105	27	113.55	17	2	0.00268638	97.6567	0.0062474	25.1	0.0074344
7	10.26	150	968.7	972.2	970.45	1.7	0.7	28.4	0.105	27	113.55	17	2	0.00268638	97.6567	0.0062474	25.1	0.00424823
1	9.5	175	963.6	966.6	965.1	1.9	0.5	27.4	0.113	25	293.72	49	2	0.0475318	95.1172	0.0209391	25	0.0908757
2	9.5	175	963.6	966.6	965.1	1.9	0.5	27.4	0.113	25	293.72	49	2	0.0475318	95.1172	0.0209391	25	0.0751714
3	9.5	175	963.6	966.6	965.1	1.9	0.5	27.4	0.113	25	293.72	49	2	0.0475318	95.1172	0.0209391	25	0.0125635
4	9.5	175	963.6	966.6	965.1	1.9	0.5	27.4	0.113	25	293.72	49	2	0.0475318	95.1172	0.0209391	25	0.0213579
5	9.5	175	963.6	966.6	965.1	1.9	0.5	27.4	0.113	25	293.72	49	2	0.0475318	95.1172	0.0209391	25	0.0448097
6	9.5	175	963.6	966.6	965.1	1.9	0.5	27.4	0.113	25	293.72	49	2	0.0475318	95.1172	0.0209391	25	0.0332932
7	9.5	175	963.6	966.6	965.1	1.9	0.5	27.4	0.113	25	293.72	49	2	0.0475318	95.1172	0.0209391	25	0.056745
8	9.5	175	963.6	966.6	965.1	1.9	0.5	27.4	0.113	25	293.72	49	2	0.0475318	95.1172	0.0209391	25	0.0720305
10	9.5	175	963.6	966.6	965.1	1.9	0.5	27.4	0.113	25	293.72	49	2	0.0475318	95.1172	0.0209391	25	0.000209391
11	9.5	175	963.6	966.6	965.1	1.9	0.5	27.4	0.113	25	293.72	49	2	0.0475318	95.1172	0.0209391	25	0.0150762
12	9.5	175	963.6	966.6	965.1	1.9	0.5	27.4	0.113	25	293.72	49	2	0.0475318	95.1172	0.0209391	25	0.0198922
1	9.48	125	969.2	972.2	970.7	1.6	0.9	27.1	0.301	28	176.4	29	2	0.171862	85.5044	0.0290307	25	0.0598032
2	9.48	125	969.2	972.2	970.7	1.6	0.9	27.1	0.301	28	176.4	29	2	0.171862	85.5044	0.0290307	25	0.0995753
3	9.48	125	969.2	972.2	970.7	1.6	0.9	27.1	0.301	28	176.4	29	2	0.171862	85.5044	0.0290307	25	0.109736
4	9.48	125	969.2	972.2	970.7	1.6	0.9	27.1	0.301	28	176.4	29	2	0.171862	85.5044	0.0290307	25	0.105962
5	9.48	125	969.2	972.2	970.7	1.6	0.9	27.1	0.301	28	176.4	29	2	0.171862	85.5044	0.0290307	25	0.0856406
6	9.48	125	969.2	972.2	970.7	1.6	0.9	27.1	0.301	28	176.4	29	2	0.171862	85.5044	0.0290307	25	0.106833
1	9.48	125	977.9	984	980.95	5.6	4.2	30.4	0.815	31	176.4	29	2	2.17159	85.5044	0.366822	25.07	0.755653
2	9.48	125	977.9	984	980.95	5.6	4.2	30.4	0.815	31	176.4	29	2	2.17159	85.5044	0.366822	25.07	1.2582
3	9.48	125	977.9	984	980.95	5.6	4.2	30.4	0.815	31	176.4	29	2	2.17159	85.5044	0.366822	25.07	1.38659
4	9.48	125	977.9	984	980.95	5.6	4.2	30.4	0.815	31	176.4	29	2	2.17159	85.5044	0.366822	25.07	1.3389
5	9.48	125	977.9	984	980.95	5.6	4.2	30.4	0.815	31	176.4	29	2	2.17159	85.5044	0.366822	25.07	1.08213
6	9.48	125	977.9	984	980.95	5.6	4.2	30.4	0.815	31	176.4	29	2	2.17159	85.5044	0.366822	25.07	1.34991
1	10.26	150	959.9	966.5	963.2	5	2.3	28.8	0.393	30	184.04	29	2	0	0	0.277074	25	0.340802
2	10.26	150	959.9	966.5	963.2	5	2.3	28.8	0.393	30	184.04	29	2	0	0	0.277074	25	0.545837
3	10.26	150	959.9	966.5	963.2	5	2.3	28.8	0.393	30	184.04	29	2	0	0	0.277074	25	0.360197
4	10.26	150	959.9	966.5	963.2	5	2.3	28.8	0.393	30	184.04	29	2	0	0	0.277074	25	0.634501
5	10.26	150	959.9	966.5	963.2	5	2.3	28.8	0.393	30	184.04	29	2	0	0	0.277074	25	0.756413
6	10.26	150	959.9	966.5	963.2	5	2.3	28.8	0.393	30	184.04	29	2	0	0	0.277074	25	0.581856
7	10.26	150	959.9	966.5	963.2	5	2.3	28.8	0.393	30	184.04	29	2	0	0	0.277074	25	0.509817
8	10.26	150	959.9	966.5	963.2	5	2.3	28.8	0.393	30	184.04	29	2	0	0	0.277074	25	0.487651
9	10.26	150	959.9	966.5	963.2	5	2.3	28.8	0.393	30	184.04	29	2	0	0	0.277074	25	0.656666
10	10.26	150	959.9	966.5	963.2	5	2.3	28.8	0.393	30	184.04	29	2	0	0	0.277074	25	0.939282
11	10.26	150	959.9	966.5	963.2	5	2.3	28.8	0.393	30	184.04	29	2	0	0	0.277074	25	1.23852
12	10.26	150	959.9	966.5	963.2	5	2.3	28.8	0.393	30	184.04	29	2	0	0	0.277074	25	0.864472
1	10.26	150	971.6	974.4	973	2	0.9	28.4	0.326	28	183.4	29	2	0	0	0.0899365	25	0.110622
2	10.26	150	971.6	974.4	973	2	0.9	28.4	0.326	28	183.4	29	2	0	0	0.0899365	25	0.177175
3	10.26	150	971.6	974.4	973	2	0.9	28.4	0.326	28	183.4	29	2	0	0	0.0899365	25	0.116918
4	10.26	150	971.6	974.4	973	2	0.9	28.4	0.326	28	183.4	29	2	0	0	0.0899365	25	0.205955
5	10.26	150	971.6	974.4	973	2	0.9	28.4	0.326	28	183.4	29	2	0	0	0.0899365	25	0.245527
6	10.26	150	971.6	974.4	973	2	0.9	28.4	0.326	28	183.4	29	2	0	0	0.0899365	25	0.188867
7	10.26	150	971.6	974.4	973	2	0.9	28.4	0.326	28	183.4	29	2	0	0	0.0899365	25	0.165483
8	10.26	150	971.6	974.4	973	2	0.9	28.4	0.326	28	183.4	29	2	0	0	0.0899365	25	0.158288
9	10.26	150	971.6	974.4	973	2	0.9	28.4	0.326	28	183.4	29	2	0	0	0.0899365	25	0.21315
10	10.26	150	971.6	974.4	973	2	0.9	28.4	0.326	28	183.4	29	2	0	0	0.0899365	25	0.304885
11	10.26	150	971.6	974.4	973	2	0.9	28.4	0.326	28	183.4	29	2	0	0	0.0899365	25	0.402016
12	10.26	150	971.6	974.4	973	2	0.9	28.4	0.326	28	183.4	29	2	0	0	0.0899365	25	0.280602
1	10.26	150	1012.6	1018	1015.3	4.8	3.5	30.9	0.374	25	180.16	29	2	0.429356	95.7917	0.536695	24.88	1.27197
2	10.26	150	1012.6	1018	1015.3	4.8	3.5	30.9	0.374	25	180.16	29	2	0.429356	95.7917	0.536695	24.88	1.04119
3	10.26	150	1012.6	1018	1015.3	4.8	3.5	30.9	0.374	25	180.16	29	2	0.429356	95.7917	0.536695	24.88	1.21293
4	10.26	150	1012.6	1018	1015.3	4.8	3.5	30.9	0.374	25	180.16	29	2	0.429356	95.7917	0.536695	24.88	0.574264
5	10.26	150	1012.6	1018	1015.3	4.8	3.5	30.9	0.374	25	180.16	29	2	0.429356	95.7917	0.536695	24.88	1.42761
6	10.26	150	1012.6	1018	1015.3	4.8	3.5	30.9	0.374	25	180.16	29	2	0.429356	95.7917	0.536695	24.88	1.47055
7	10.26	150	1012.6	1018	1015.3	4.8	3.5	30.9	0.374	25	180.16	29	2	0.429356	95.7917	0.536695	24.88	1.00899
8	10.26	150	1012.6	1018	1015.3	4.8	3.5	30.9	0.374	25	180.16	29	2	0.429356	95.7917	0.536695	24.88	0.520595
9	10.26	150	1012.6	1018	1015.3	4.8	3.5	30.9	0.374	25	180.16	29	2	0.429356	95.7917	0.536695	24.88	0.611833
10	10.26	150	1012.6	1018	1015.3	4.8	3.5	30.9	0.374	25	180.16	29	2	0.429356	95.7917	0.536695	24.88	0.295182
11	10.26	150	1012.6	1018	1015.3	4.8	3.5	30.9	0.374	25	180.16	29	2	0.429356	95.7917	0.536695	24.88	0.284449
12	10.26	150	1012.6	1018	1015.3	4.8	3.5	30.9	0.374	25	180.16	29	2	0.429356	95.7917	0.536695	24.88	0.558163
1	10.26	150	1022.8	1026.3	1024.55	2.6	1.5	29.6	0.53	26	110.16	17	2	0.260763	95.7917	0.325953	24.94	0.772509
2	10.26	150	1022.8	1026.3	1024.55	2.6	1.5	29.6	0.53	26	110.16	17	2	0.260763	95.7917	0.325953	24.94	0.632349
3	10.26	150	1022.8	1026.3	1024.55	2.6	1.5	29.6	0.53	26	110.16	17	2	0.260763	95.7917	0.325953	24.94	0.736654
4	10.26	150	1022.8	1026.3	1024.55	2.6	1.5	29.6	0.53	26	110.16	17	2	0.260763	95.7917	0.325953	24.94	0.34877
5	10.26	150	1022.8	1026.3	1024.55	2.6	1.5	29.6	0.53	26	110.16	17	2	0.260763	95.7917	0.325953	24.94	0.867036
6	10.26	150	1022.8	1026.3	1024.55	2.6	1.5	29.6	0.53	26	110.16	17	2	0.260763	95.7917	0.325953	24.94	0.893112
7	10.26	150	1022.8	1026.3	1024.55	2.6	1.5	29.6	0.53	26	110.16	17	2	0.260763	95.7917	0.325953	24.94	0.612792
8	10.26	150	1022.8	1026.3	1024.55	2.6	1.5	29.6	0.53	26	110.16	17	2	0.260763	95.7917	0.325953	24.94	0.316175
9	10.26	150	1022.8	1026.3	1024.55	2.6	1.5	29.6	0.53	26	110.16	17	2	0.260763	95.7917	0.325953	24.94	0.371587
10	10.26	150	1022.8	1026.3	1024.55	2.6	1.5	29.6	0.53	26	110.16	17	2	0.260763	95.7917	0.325953	24.94	0.179274
11	10.26	150	1022.8	1026.3	1024.55	2.6	1.5	29.6	0.53	26	110.16	17	2	0.260763	95.7917	0.325953	24.94	0.172755
12	10.26	150	1022.8	1026.3	1024.55	2.6	1.5	29.6	0.53	26	110.16	17	2	0.260763	95.7917	0.325953	24.94	0.338991
1	9.48	125	969.7	973.8	971.75	2.6	1.2	27.4	0.208	24	155.2	27	2	0.203045	86.015	0.0402068	25.06	0.521483
2	9.48	125	969.7	973.8	971.75	2.6	1.2	27.4	0.208	24	155.2	27	2	0.203045	86.015	0.0402068	25.06	0.525503
3	9.48	125	969.7	973.8	971.75	2.6	1.2	27.4	0.208	24	155.2	27	2	0.203045	86.015	0.0402068	25.06	0.320046
4	9.48	125	969.7	973.8	971.75	2.6	1.2	27.4	0.208	24	155.2	27	2	0.203045	86.015	0.0402068	25.06	0.246066
5	9.48	125	969.7	973.8	971.75	2.6	1.2	27.4	0.208	24	155.2	27	2	0.203045	86.015	0.0402068	25.06	0.152384
6	9.48	125	969.7	973.8	971.75	2.6	1.2	27.4	0.208	24	155.2	27	2	0.203045	86.015	0.0402068	25.06	0.0261344
7	9.48	125	969.7	973.8	971.75	2.6	1.2	27.4	0.208	24	155.2	27	2	0.203045	86.015	0.0402068	25.06	0.0136703
1	9.48	125	979.8	984.6	982.2	4.4	3.6	31.3	0.668	22	165	29	2	1.95626	86.015	0.387377	25.13	5.02428
2	9.48	125	979.8	984.6	982.2	4.4	3.6	31.3	0.668	22	165	29	2	1.95626	86.015	0.387377	25.13	5.06302
3	9.48	125	979.8	984.6	982.2	4.4	3.6	31.3	0.668	22	165	29	2	1.95626	86.015	0.387377	25.13	3.08352
4	9.48	125	979.8	984.6	982.2	4.4	3.6	31.3	0.668	22	165	29	2	1.95626	86.015	0.387377	25.13	2.37075
5	9.48	125	979.8	984.6	982.2	4.4	3.6	31.3	0.668	22	165	29	2	1.95626	86.015	0.387377	25.13	1.46816
6	9.48	125	979.8	984.6	982.2	4.4	3.6	31.3	0.668	22	165	29	2	1.95626	86.015	0.387377	25.13	0.251795
7	9.48	125	979.8	984.6	982.2	4.4	3.6	31.3	0.668	22	165	29	2	1.95626	86.015	0.387377	25.13	0.131708
1	9.48	125	990.6	1000.4	995.5	9.6	6.9	30.5	0.515	23	155.2	27	2	2.8907	86.015	0.572416	25.06	7.42423
2	9.48	125	990.6	1000.4	995.5	9.6	6.9	30.5	0.515	23	155.2	27	2	2.8907	86.015	0.572416	25.06	7.48147
3	9.48	125	990.6	1000.4	995.5	9.6	6.9	30.5	0.515	23	155.2	27	2	2.8907	86.015	0.572416	25.06	4.55643
4	9.48	125	990.6	1000.4	995.5	9.6	6.9	30.5	0.515	23	155.2	27	2	2.8907	86.015	0.572416	25.06	3.50318
5	9.48	125	990.6	1000.4	995.5	9.6	6.9	30.5	0.515	23	155.2	27	2	2.8907	86.015	0.572416	25.06	2.16946
6	9.48	125	990.6	1000.4	995.5	9.6	6.9	30.5	0.515	23	155.2	27	2	2.8907	86.015	0.572416	25.06	0.37207
7	9.48	125	990.6	1000.4	995.5	9.6	6.9	30.5	0.515	23	155.2	27	2	2.8907	86.015	0.572416	25.06	0.194621
1	7.79	150	853.5	860.4	856.95	1.8	1.3	31	0.72	25	224.04	37	2	0.164322	96.3258	0.127382	25.03	0.379597
2	7.79	150	853.5	860.4	856.95	1.8	1.3	31	0.72	25	224.04	37	2	0.164322	96.3258	0.127382	25.03	0.34393
3	7.79	150	853.5	860.4	856.95	1.8	1.3	31	0.72	25	224.04	37	2	0.164322	96.3258	0.127382	25.03	0.239477
4	7.79	150	853.5	860.4	856.95	1.8	1.3	31	0.72	25	224.04	37	2	0.164322	96.3258	0.127382	25.03	0.117191
1	7.79	150	861.6	867.9	864.75	4.9	4	31.6	0.859	24	167.4	27	2	0.603217	96.3258	0.46761	25.06	1.39348
2	7.79	150	861.6	867.9	864.75	4.9	4	31.6	0.859	24	167.4	27	2	0.603217	96.3258	0.46761	25.06	1.26255
3	7.79	150	861.6	867.9	864.75	4.9	4	31.6	0.859	24	167.4	27	2	0.603217	96.3258	0.46761	25.06	0.879107
4	7.79	150	861.6	867.9	864.75	4.9	4	31.6	0.859	24	167.4	27	2	0.603217	96.3258	0.46761	25.06	0.430201
1	10.26	150	957.4	965.4	961.4	5.7	2.3	30.8	0.746	46	253	47	2	0.825376	94.8812	0.982591	25.04	2.54491
2	10.26	150	957.4	965.4	961.4	5.7	2.3	30.8	0.746	46	253	47	2	0.825376	94.8812	0.982591	25.04	3.5275
3	10.26	150	957.4	965.4	961.4	5.7	2.3	30.8	0.746	46	253	47	2	0.825376	94.8812	0.982591	25.04	4.96208
4	10.26	150	957.4	965.4	961.4	5.7	2.3	30.8	0.746	46	253	47	2	0.825376	94.8812	0.982591	25.04	2.57439
5	10.26	150	957.4	965.4	961.4	5.7	2.3	30.8	0.746	46	253	47	2	0.825376	94.8812	0.982591	25.04	4.5494
6	10.26	150	957.4	965.4	961.4	5.7	2.3	30.8	0.746	46	253	47	2	0.825376	94.8812	0.982591	25.04	1.45423
7	10.26	150	957.4	965.4	961.4	5.7	2.3	30.8	0.746	46	253	47	2	0.825376	94.8812	0.982591	25.04	2.25013
8	10.26	150	957.4	965.4	961.4	5.7	2.3	30.8	0.746	46	253	47	2	0.825376	94.8812	0.982591	25.04	2.34839
9	10.26	150	957.4	965.4	961.4	5.7	2.3	30.8	0.746	46	253	47	2	0.825376	94.8812	0.982591	25.04	4.29392
10	10.26	150	957.4	965.4	961.4	5.7	2.3	30.8	0.746	46	253	47	2	0.825376	94.8812	0.982591	25.04	3.18359
1	9.58	125	923.2	931.6	927.4	8	6.4	31.8	0.627	29	106.82	17	2	0.703203	90.9483	0.478369	24.9	2.26269
2	9.58	125	923.2	931.6	927.4	8	6.4	31.8	0.627	29	106.82	17	2	0.703203	90.9483	0.478369	24.9	0.148294
3	9.58	125	923.2	931.6	927.4	8	6.4	31.8	0.627	29	106.82	17	2	0.703203	90.9483	0.478369	24.9	0.406614
4	9.58	125	923.2	931.6	927.4	8	6.4	31.8	0.627	29	106.82	17	2	0.703203	90.9483	0.478369	24.9	0.588394
5	9.58	125	923.2	931.6	927.4	8	6.4	31.8	0.627	29	106.82	17	2	0.703203	90.9483	0.478369	24.9	1.23419
6	9.58	125	923.2	931.6	927.4	8	6.4	31.8	0.627	29	106.82	17	2	0.703203	90.9483	0.478369	24.9	1.37292
7	9.58	125	923.2	931.6	927.4	8	6.4	31.8	0.627	29	106.82	17	2	0.703203	90.9483	0.478369	24.9	0.330075
8	9.58	125	923.2	931.6	927.4	8	6.4	31.8	0.627	29	106.82	17	2	0.703203	90.9483	0.478369	24.9	0.0765391
1	9.58	125	941.5	951.8	946.65	7.7	4.9	31	0.893	29	176.06	29	2	0.766797	90.9483	0.521631	25	2.46731
2	9.58	125	941.5	951.8	946.65	7.7	4.9	31	0.893	29	176.06	29	2	0.766797	90.9483	0.521631	25	0.161706
3	9.58	125	941.5	951.8	946.65	7.7	4.9	31	0.893	29	176.06	29	2	0.766797	90.9483	0.521631	25	0.443386
4	9.58	125	941.5	951.8	946.65	7.7	4.9	31	0.893	29	176.06	29	2	0.766797	90.9483	0.521631	25	0.641606
5	9.58	125	941.5	951.8	946.65	7.7	4.9	31	0.893	29	176.06	29	2	0.766797	90.9483	0.521631	25	1.34581
6	9.58	125	941.5	951.8	946.65	7.7	4.9	31	0.893	29	176.06	29	2	0.766797	90.9483	0.521631	25	1.49708
7	9.58	125	941.5	951.8	946.65	7.7	4.9	31	0.893	29	176.06	29	2	0.766797	90.9483	0.521631	25	0.359925
8	9.58	125	941.5	951.8	946.65	7.7	4.9	31	0.893	29	176.06	29	2	0.766797	90.9483	0.521631	25	0.0834609
1	10.12	125	1062.4	1068	1065.2	4	1.3	29.3	0.489	24	174.26	27	2	0.0196071	99.6093	0.0754119	25	0.0708872
1	10.26	150	1031	1034.5	1032.75	1.2	0.5	27	0.061	29	180.56	29	2	0.00929508	84.1816	0.00808268	24.88	0.0250563
2	10.26	150	1031	1034.5	1032.75	1.2	0.5	27	0.061	29	180.56	29	2	0.00929508	84.1816	0.00808268	24.88	0.0202067
3	10.26	150	1031	1034.5	1032.75	1.2	0.5	27	0.061	29	180.56	29	2	0.00929508	84.1816	0.00808268	24.88	0.02053
4	10.26	150	1031	1034.5	1032.75	1.2	0.5	27	0.061	29	180.56	29	2	0.00929508	84.1816	0.00808268	24.88	0.0160845
5	10.26	150	1031	1034.5	1032.75	1.2	0.5	27	0.061	29	180.56	29	2	0.00929508	84.1816	0.00808268	24.88	0.00654697
6	10.26	150	1031	1034.5	1032.75	1.2	0.5	27	0.061	29	180.56	29	2	0.00929508	84.1816	0.00808268	24.88	0.00404134
7	10.26	150	1031	1034.5	1032.75	1.2	0.5	27	0.061	29	180.56	29	2	0.00929508	84.1816	0.00808268	24.88	0.00315225
8	10.26	150	1031	1034.5	1032.75	1.2	0.5	27	0.061	29	180.56	29	2	0.00929508	84.1816	0.00808268	24.88	0.000889095
9	10.26	150	1031	1034.5	1032.75	1.2	0.5	27	0.061	29	180.56	29	2	0.00929508	84.1816	0.00808268	24.88	0.00929508
10	10.26	150	1031	1034.5	1032.75	1.2	0.5	27	0.061	29	180.56	29	2	0.00929508	84.1816	0.00808268	24.88	0.01075
11	10.26	150	1031	1034.5	1032.75	1.2	0.5	27	0.061	29	180.56	29	2	0.00929508	84.1816	0.00808268	24.88	0.00978005
12	10.26	150	1031	1034.5	1032.75	1.2	0.5	27	0.061	29	180.56	29	2	0.00929508	84.1816	0.00808268	24.88	0.00816351
1	10.26	150	1036.1	1037.8	1036.95	0.9	0.9	27.3	0.113	31	181.12	29	2	0.0309938	84.1816	0.0269511	24.88	0.0835484
2	10.26	150	1036.1	1037.8	1036.95	0.9	0.9	27.3	0.113	31	181.12	29	2	0.0309938	84.1816	0.0269511	24.88	0.0673778
3	10.26	150	1036.1	1037.8	1036.95	0.9	0.9	27.3	0.113	31	181.12	29	2	0.0309938	84.1816	0.0269511	24.88	0.0684558
4	10.26	150	1036.1	1037.8	1036.95	0.9	0.9	27.3	0.113	31	181.12	29	2	0.0309938	84.1816	0.0269511	24.88	0.0536327
5	10.26	150	1036.1	1037.8	1036.95	0.9	0.9	27.3	0.113	31	181.12	29	2	0.0309938	84.1816	0.0269511	24.88	0.0218304
6	10.26	150	1036.1	1037.8	1036.95	0.9	0.9	27.3	0.113	31	181.12	29	2	0.0309938	84.1816	0.0269511	24.88	0.0134756
7	10.26	150	1036.1	1037.8	1036.95	0.9	0.9	27.3	0.113	31	181.12	29	2	0.0309938	84.1816	0.0269511	24.88	0.0105109
8	10.26	150	1036.1	1037.8	1036.95	0.9	0.9	27.3	0.113	31	181.12	29	2	0.0309938	84.1816	0.0269511	24.88	0.00296462
9	10.26	150	1036.1	1037.8	1036.95	0.9	0.9	27.3	0.113	31	181.12	29	2	0.0309938	84.1816	0.0269511	24.88	0.0309938
10	10.26	150	1036.1	1037.8	1036.95	0.9	0.9	27.3	0.113	31	181.12	29	2	0.0309938	84.1816	0.0269511	24.88	0.035845
11	10.26	150	1036.1	1037.8	1036.95	0.9	0.9	27.3	0.113	31	181.12	29	2	0.0309938	84.1816	0.0269511	24.88	0.0326108
12	10.26	150	1036.1	1037.8	1036.95	0.9	0.9	27.3	0.113	31	181.12	29	2	0.0309938	84.1816	0.0269511	24.88	0.0272206
1	10.39	150	893.7	897.9	895.8	3.7	1.9	31.4	1.027	31	188.96	23	2	0.739341	84.144	0.294558	25.05	2.63335
2	10.39	150	893.7	897.9	895.8	3.7	1.9	31.4	1.027	31	188.96	23	2	0.739341	84.144	0.294558	25.05	2.18562
3	10.39	150	893.7	897.9	895.8	3.7	1.9	31.4	1.027	31	188.96	23	2	0.739341	84.144	0.294558	25.05	1.75262
4	10.39	150	893.7	897.9	895.8	3.7	1.9	31.4	1.027	31	188.96	23	2	0.739341	84.144	0.294558	25.05	0.662756
5	10.39	150	893.7	897.9	895.8	3.7	1.9	31.4	1.027	31	188.96	23	2	0.739341	84.144	0.294558	25.05	0.500749
6	10.39	150	893.7	897.9	895.8	3.7	1.9	31.4	1.027	31	188.96	23	2	0.739341	84.144	0.294558	25.05	0.27983
7	10.39	150	893.7	897.9	895.8	3.7	1.9	31.4	1.027	31	188.96	23	2	0.739341	84.144	0.294558	25.05	0.315177
8	10.39	150	893.7	897.9	895.8	3.7	1.9	31.4	1.027	31	188.96	23	2	0.739341	84.144	0.294558	25.05	0.0942586
1	10.39	150	911	914.6	912.8	3.1	1.6	31.4	0.542	29	179.15	29	2	0.328579	84.144	0.130908	24.88	1.17032
2	10.39	150	911	914.6	912.8	3.1	1.6	31.4	0.542	29	179.15	29	2	0.328579	84.144	0.130908	24.88	0.971337
3	10.39	150	911	914.6	912.8	3.1	1.6	31.4	0.542	29	179.15	29	2	0.328579	84.144	0.130908	24.88	0.778903
4	10.39	150	911	914.6	912.8	3.1	1.6	31.4	0.542	29	179.15	29	2	0.328579	84.144	0.130908	24.88	0.294543
5	10.39	150	911	914.6	912.8	3.1	1.6	31.4	0.542	29	179.15	29	2	0.328579	84.144	0.130908	24.88	0.222544
6	10.39	150	911	914.6	912.8	3.1	1.6	31.4	0.542	29	179.15	29	2	0.328579	84.144	0.130908	24.88	0.124363
7	10.39	150	911	914.6	912.8	3.1	1.6	31.4	0.542	29	179.15	29	2	0.328579	84.144	0.130908	24.88	0.140072
8	10.39	150	911	914.6	912.8	3.1	1.6	31.4	0.542	29	179.15	29	2	0.328579	84.144	0.130908	24.88	0.0418906
1	9.58	125	940.5	944.9	942.7	1.4	0.4	28.9	0.041	36	176.06	29	2	0.00130779	91.6962	0.00111777	25	0.00204551
2	9.58	125	940.5	944.9	942.7	1.4	0.4	28.9	0.041	36	176.06	29	2	0.00130779	91.6962	0.00111777	25	0.00190021
3	9.58	125	940.5	944.9	942.7	1.4	0.4	28.9	0.041	36	176.06	29	2	0.00130779	91.6962	0.00111777	25	0.00279442
4	9.58	125	940.5	944.9	942.7	1.4	0.4	28.9	0.041	36	176.06	29	2	0.00130779	91.6962	0.00111777	25	0.0021014
5	9.58	125	940.5	944.9	942.7	1.4	0.4	28.9	0.041	36	176.06	29	2	0.00130779	91.6962	0.00111777	25	0.00242556
6	9.58	125	940.5	944.9	942.7	1.4	0.4	28.9	0.041	36	176.06	29	2	0.00130779	91.6962	0.00111777	25	0.000648305
7	9.58	125	940.5	944.9	942.7	1.4	0.4	28.9	0.041	36	176.06	29	2	0.00130779	91.6962	0.00111777	25	0.00130779
8	9.58	125	940.5	944.9	942.7	1.4	0.4	28.9	0.041	36	176.06	29	2	0.00130779	91.6962	0.00111777	25	0.000726549
9	9.58	125	940.5	944.9	942.7	1.4	0.4	28.9	0.041	36	176.06	29	2	0.00130779	91.6962	0.00111777	25	0.00202316
10	9.58	125	940.5	944.9	942.7	1.4	0.4	28.9	0.041	36	176.06	29	2	0.00130779	91.6962	0.00111777	25	0.00168783
11	9.58	125	940.5	944.9	942.7	1.4	0.4	28.9	0.041	36	176.06	29	2	0.00130779	91.6962	0.00111777	25	0.00120719
1	10.26	150	873.3	882.8	878.05	2.4	2.4	31.7	0.72	28	260.06	24	2	1.36	94.3262	1	25.01	3.52
2	10.26	150	873.3	882.8	878.05	2.4	2.4	31.7	0.72	28	260.06	24	2	1.36	94.3262	1	25.01	3.87
3	10.26	150	873.3	882.8	878.05	2.4	2.4	31.7	0.72	28	260.06	24	2	1.36	94.3262	1	25.01	4.48
4	10.26	150	873.3	882.8	878.05	2.4	2.4	31.7	0.72	28	260.06	24	2	1.36	94.3262	1	25.01	4.12
5	10.26	150	873.3	882.8	878.05	2.4	2.4	31.7	0.72	28	260.06	24	2	1.36	94.3262	1	25.01	3.07
6	10.26	150	873.3	882.8	878.05	2.4	2.4	31.7	0.72	28	260.06	24	2	1.36	94.3262	1	25.01	3.23
7	10.26	150	873.3	882.8	878.05	2.4	2.4	31.7	0.72	28	260.06	24	2	1.36	94.3262	1	25.01	0.64
8	10.26	150	873.3	882.8	878.05	2.4	2.4	31.7	0.72	28	260.06	24	2	1.36	94.3262	1	25.01	2.05
9	10.26	150	873.3	882.8	878.05	2.4	2.4	31.7	0.72	28	260.06	24	2	1.36	94.3262	1	25.01	2.17
10	10.26	150	873.3	882.8	878.05	2.4	2.4	31.7	0.72	28	260.06	24	2	1.36	94.3262	1	25.01	1.39
11	10.26	150	873.3	882.8	878.05	2.4	2.4	31.7	0.72	28	260.06	24	2	1.36	94.3262	1	25.01	0.39
2	10.26	150	944.3	946.6	945.45	1.8	0.8	28.3	0.491	33	257.88	43	2	0.407241	81.8665	0.0851968	24.97	0.742064
3	10.26	150	944.3	946.6	945.45	1.8	0.8	28.3	0.491	33	257.88	43	2	0.407241	81.8665	0.0851968	24.97	0.599786
4	10.26	150	944.3	946.6	945.45	1.8	0.8	28.3	0.491	33	257.88	43	2	0.407241	81.8665	0.0851968	24.97	0.279446
1	9.58	125	942.8	948.6	945.7	4.9	1.4	30.7	0.203	27	106.82	17	2	0.0244283	97.8429	0.0381692	24.9	0.331308
2	9.58	125	942.8	948.6	945.7	4.9	1.4	30.7	0.203	27	106.82	17	2	0.0244283	97.8429	0.0381692	24.9	0.197335
3	9.58	125	942.8	948.6	945.7	4.9	1.4	30.7	0.203	27	106.82	17	2	0.0244283	97.8429	0.0381692	24.9	0.134737
4	9.58	125	942.8	948.6	945.7	4.9	1.4	30.7	0.203	27	106.82	17	2	0.0244283	97.8429	0.0381692	24.9	0.0950412
5	9.58	125	942.8	948.6	945.7	4.9	1.4	30.7	0.203	27	106.82	17	2	0.0244283	97.8429	0.0381692	24.9	0.114126
6	9.58	125	942.8	948.6	945.7	4.9	1.4	30.7	0.203	27	106.82	17	2	0.0244283	97.8429	0.0381692	24.9	0.0778651
7	9.58	125	942.8	948.6	945.7	4.9	1.4	30.7	0.203	27	106.82	17	2	0.0244283	97.8429	0.0381692	24.9	0.0610707
8	9.58	125	942.8	948.6	945.7	4.9	1.4	30.7	0.203	27	106.82	17	2	0.0244283	97.8429	0.0381692	24.9	0.0343523
9	9.58	125	942.8	948.6	945.7	4.9	1.4	30.7	0.203	27	106.82	17	2	0.0244283	97.8429	0.0381692	24.9	0.0366424
10	9.58	125	942.8	948.6	945.7	4.9	1.4	30.7	0.203	27	106.82	17	2	0.0244283	97.8429	0.0381692	24.9	0.030917
11	9.58	125	942.8	948.6	945.7	4.9	1.4	30.7	0.203	27	106.82	17	2	0.0244283	97.8429	0.0381692	24.9	0.0339706
12	9.58	125	942.8	948.6	945.7	4.9	1.4	30.7	0.203	27	106.82	17	2	0.0244283	97.8429	0.0381692	24.9	0.0110691
1	9.58	125	955.4	958.6	957	2.7	1.4	28.5	0.207	30	142.18	23	2	0.0249096	97.8429	0.0389213	25	0.337837
2	9.58	125	955.4	958.6	957	2.7	1.4	28.5	0.207	30	142.18	23	2	0.0249096	97.8429	0.0389213	25	0.201223
3	9.58	125	955.4	958.6	957	2.7	1.4	28.5	0.207	30	142.18	23	2	0.0249096	97.8429	0.0389213	25	0.137392
4	9.58	125	955.4	958.6	957	2.7	1.4	28.5	0.207	30	142.18	23	2	0.0249096	97.8429	0.0389213	25	0.096914
5	9.58	125	955.4	958.6	957	2.7	1.4	28.5	0.207	30	142.18	23	2	0.0249096	97.8429	0.0389213	25	0.116375
6	9.58	125	955.4	958.6	957	2.7	1.4	28.5	0.207	30	142.18	23	2	0.0249096	97.8429	0.0389213	25	0.0793994
7	9.58	125	955.4	958.6	957	2.7	1.4	28.5	0.207	30	142.18	23	2	0.0249096	97.8429	0.0389213	25	0.062274
8	9.58	125	955.4	958.6	957	2.7	1.4	28.5	0.207	30	142.18	23	2	0.0249096	97.8429	0.0389213	25	0.0350291
9	9.58	125	955.4	958.6	957	2.7	1.4	28.5	0.207	30	142.18	23	2	0.0249096	97.8429	0.0389213	25	0.0373644
10	9.58	125	955.4	958.6	957	2.7	1.4	28.5	0.207	30	142.18	23	2	0.0249096	97.8429	0.0389213	25	0.0315262
11	9.58	125	955.4	958.6	957	2.7	1.4	28.5	0.207	30	142.18	23	2	0.0249096	97.8429	0.0389213	25	0.0346399
12	9.58	125	955.4	958.6	957	2.7	1.4	28.5	0.207	30	142.18	23	2	0.0249096	97.8429	0.0389213	25	0.0112872
1	9.58	125	959.8	968.9	964.35	7.3	5.6	31.2	0.912	25	142.18	23	2	0.438987	97.8429	0.685917	25	5.95376
2	9.58	125	959.8	968.9	964.35	7.3	5.6	31.2	0.912	25	142.18	23	2	0.438987	97.8429	0.685917	25	3.54619
3	9.58	125	959.8	968.9	964.35	7.3	5.6	31.2	0.912	25	142.18	23	2	0.438987	97.8429	0.685917	25	2.42129
4	9.58	125	959.8	968.9	964.35	7.3	5.6	31.2	0.912	25	142.18	23	2	0.438987	97.8429	0.685917	25	1.70793
5	9.58	125	959.8	968.9	964.35	7.3	5.6	31.2	0.912	25	142.18	23	2	0.438987	97.8429	0.685917	25	2.05089
6	9.58	125	959.8	968.9	964.35	7.3	5.6	31.2	0.912	25	142.18	23	2	0.438987	97.8429	0.685917	25	1.39927
7	9.58	125	959.8	968.9	964.35	7.3	5.6	31.2	0.912	25	142.18	23	2	0.438987	97.8429	0.685917	25	1.09747
8	9.58	125	959.8	968.9	964.35	7.3	5.6	31.2	0.912	25	142.18	23	2	0.438987	97.8429	0.685917	25	0.617325
9	9.58	125	959.8	968.9	964.35	7.3	5.6	31.2	0.912	25	142.18	23	2	0.438987	97.8429	0.685917	25	0.65848
10	9.58	125	959.8	968.9	964.35	7.3	5.6	31.2	0.912	25	142.18	23	2	0.438987	97.8429	0.685917	25	0.555593
11	9.58	125	959.8	968.9	964.35	7.3	5.6	31.2	0.912	25	142.18	23	2	0.438987	97.8429	0.685917	25	0.610466
12	9.58	125	959.8	968.9	964.35	7.3	5.6	31.2	0.912	25	142.18	23	2	0.438987	97.8429	0.685917	25	0.198916
[truncated: 4,516 more rows]
