# Supplementary material for: Data-driven intelligent productivity prediction model for horizontal fracture stimulation
Source: Frontiers journal article supplement (doi:10.3389/feart.2025.1601363), 2025-08-01
Supplement: Table_4.xlsx [file Table_4.xlsx]

## Sheet: 06
Post-fracture duration(mon)	present fomraiton pressure(MPa)	well spacing(m)	depth at the top(m)	oil bed depth(m)	Depth of the central part of the oil layer(m)	Sandstone thickness(m)	Effective thickness(m)	Porosity(%)	permeability(μm)	Breakdown pressure(MPa)	Total liquid volume(m^3)	quantity of sand added(m^3)	Number of fracture slits (slits)	pre-fracture water content(%)	Production capacity splitting factor(1)	sand mixing ratio	Daily oil increase(t)
1	9.45	175	915.3	919.5	917.4	3.6	2.3	29.3	0.23	29	143.52	24	1	86.7268	0.0892225	25	0.0910069
2	9.45	175	915.3	919.5	917.4	3.6	2.3	29.3	0.23	29	143.52	24	1	86.7268	0.0892225	25	0.143648
3	9.45	175	915.3	919.5	917.4	3.6	2.3	29.3	0.23	29	143.52	24	1	86.7268	0.0892225	25	0.0214134
1	8.83	175	897.4	901.5	899.45	4.1	1.8	29	0.17	29	143.28	24	1	85.6205	0.0885417	25	0.0938542
2	8.83	175	897.4	901.5	899.45	4.1	1.8	29	0.17	29	143.28	24	1	85.6205	0.0885417	25	0.0593229
1	11.72	125	1067.1	1069.6	1068.35	2.5	1.5	28.2	0.701	38	44.64	7	1	96.3445	0.109538	25.07	0.273845
2	11.72	125	1067.1	1069.6	1068.35	2.5	1.5	28.2	0.701	38	44.64	7	1	96.3445	0.109538	25.07	0.420626
3	11.72	125	1067.1	1069.6	1068.35	2.5	1.5	28.2	0.701	38	44.64	7	1	96.3445	0.109538	25.07	0.418436
4	11.72	125	1067.1	1069.6	1068.35	2.5	1.5	28.2	0.701	38	44.64	7	1	96.3445	0.109538	25.07	0.307802
5	11.72	125	1067.1	1069.6	1068.35	2.5	1.5	28.2	0.701	38	44.64	7	1	96.3445	0.109538	25.07	0.247556
6	11.72	125	1067.1	1069.6	1068.35	2.5	1.5	28.2	0.701	38	44.64	7	1	96.3445	0.109538	25.07	0.14459
7	11.72	125	1067.1	1069.6	1068.35	2.5	1.5	28.2	0.701	38	44.64	7	1	96.3445	0.109538	25.07	0.120492
8	11.72	125	1067.1	1069.6	1068.35	2.5	1.5	28.2	0.701	38	44.64	7	1	96.3445	0.109538	25.07	0.115015
9	11.72	125	1067.1	1069.6	1068.35	2.5	1.5	28.2	0.701	38	44.64	7	1	96.3445	0.109538	25.07	0.164307
10	11.72	125	1067.1	1069.6	1068.35	2.5	1.5	28.2	0.701	38	44.64	7	1	96.3445	0.109538	25.07	0.122683
11	11.72	125	1067.1	1069.6	1068.35	2.5	1.5	28.2	0.701	38	44.64	7	1	96.3445	0.109538	25.07	0.156639
12	11.72	125	1067.1	1069.6	1068.35	2.5	1.5	28.2	0.701	38	44.64	7	1	96.3445	0.109538	25.07	0.0974889
1	11.72	125	1084.3	1091.4	1087.85	5.9	3.8	28.5	0.703	33	38.88	6	1	96.3445	0.278288	25	0.695721
2	11.72	125	1084.3	1091.4	1087.85	5.9	3.8	28.5	0.703	33	38.88	6	1	96.3445	0.278288	25	1.06863
3	11.72	125	1084.3	1091.4	1087.85	5.9	3.8	28.5	0.703	33	38.88	6	1	96.3445	0.278288	25	1.06306
4	11.72	125	1084.3	1091.4	1087.85	5.9	3.8	28.5	0.703	33	38.88	6	1	96.3445	0.278288	25	0.78199
5	11.72	125	1084.3	1091.4	1087.85	5.9	3.8	28.5	0.703	33	38.88	6	1	96.3445	0.278288	25	0.628931
6	11.72	125	1084.3	1091.4	1087.85	5.9	3.8	28.5	0.703	33	38.88	6	1	96.3445	0.278288	25	0.36734
7	11.72	125	1084.3	1091.4	1087.85	5.9	3.8	28.5	0.703	33	38.88	6	1	96.3445	0.278288	25	0.306117
8	11.72	125	1084.3	1091.4	1087.85	5.9	3.8	28.5	0.703	33	38.88	6	1	96.3445	0.278288	25	0.292203
9	11.72	125	1084.3	1091.4	1087.85	5.9	3.8	28.5	0.703	33	38.88	6	1	96.3445	0.278288	25	0.417432
10	11.72	125	1084.3	1091.4	1087.85	5.9	3.8	28.5	0.703	33	38.88	6	1	96.3445	0.278288	25	0.311683
11	11.72	125	1084.3	1091.4	1087.85	5.9	3.8	28.5	0.703	33	38.88	6	1	96.3445	0.278288	25	0.397952
12	11.72	125	1084.3	1091.4	1087.85	5.9	3.8	28.5	0.703	33	38.88	6	1	96.3445	0.278288	25	0.247677
1	10.02	175	993.2	995.1	994.15	1.9	0.5	27.3	0.213	22	120.24	20	1	94.4072	0.0168539	25.05	0.0696067
2	10.02	175	993.2	995.1	994.15	1.9	0.5	27.3	0.213	22	120.24	20	1	94.4072	0.0168539	25.05	0.0696067
3	10.02	175	993.2	995.1	994.15	1.9	0.5	27.3	0.213	22	120.24	20	1	94.4072	0.0168539	25.05	0.0583146
4	10.02	175	993.2	995.1	994.15	1.9	0.5	27.3	0.213	22	120.24	20	1	94.4072	0.0168539	25.05	0.0583146
5	10.02	175	993.2	995.1	994.15	1.9	0.5	27.3	0.213	22	120.24	20	1	94.4072	0.0168539	25.05	0.0385955
6	10.02	175	993.2	995.1	994.15	1.9	0.5	27.3	0.213	22	120.24	20	1	94.4072	0.0168539	25.05	0.0385955
7	10.02	175	993.2	995.1	994.15	1.9	0.5	27.3	0.213	22	120.24	20	1	94.4072	0.0168539	25.05	0.0389326
8	10.02	175	993.2	995.1	994.15	1.9	0.5	27.3	0.213	22	120.24	20	1	94.4072	0.0168539	25.05	0.0389326
9	10.02	175	993.2	995.1	994.15	1.9	0.5	27.3	0.213	22	120.24	20	1	94.4072	0.0168539	25.05	0.0267978
10	10.02	175	993.2	995.1	994.15	1.9	0.5	27.3	0.213	22	120.24	20	1	94.4072	0.0168539	25.05	0.0267978
11	10.02	175	993.2	995.1	994.15	1.9	0.5	27.3	0.213	22	120.24	20	1	94.4072	0.0168539	25.05	0.0330337
12	10.02	175	993.2	995.1	994.15	1.9	0.5	27.3	0.213	22	120.24	20	1	94.4072	0.0168539	25.05	0.0330337
1	11.72	125	1082.2	1085	1083.6	2.8	1.6	29.1	0.401	28	91.44	15	1	93.5076	0.132387	25	1.75942
2	11.72	125	1082.2	1085	1083.6	2.8	1.6	29.1	0.401	28	91.44	15	1	93.5076	0.132387	25	1.27224
3	11.72	125	1082.2	1085	1083.6	2.8	1.6	29.1	0.401	28	91.44	15	1	93.5076	0.132387	25	0.675173
4	11.72	125	1082.2	1085	1083.6	2.8	1.6	29.1	0.401	28	91.44	15	1	93.5076	0.132387	25	0.717537
5	11.72	125	1082.2	1085	1083.6	2.8	1.6	29.1	0.401	28	91.44	15	1	93.5076	0.132387	25	0.32832
6	11.72	125	1082.2	1085	1083.6	2.8	1.6	29.1	0.401	28	91.44	15	1	93.5076	0.132387	25	0.517633
7	11.72	125	1082.2	1085	1083.6	2.8	1.6	29.1	0.401	28	91.44	15	1	93.5076	0.132387	25	0.256831
8	11.72	125	1082.2	1085	1083.6	2.8	1.6	29.1	0.401	28	91.44	15	1	93.5076	0.132387	25	0.259478
9	11.72	125	1082.2	1085	1083.6	2.8	1.6	29.1	0.401	28	91.44	15	1	93.5076	0.132387	25	0.291251
10	11.72	125	1082.2	1085	1083.6	2.8	1.6	29.1	0.401	28	91.44	15	1	93.5076	0.132387	25	0.361416
11	11.72	125	1082.2	1085	1083.6	2.8	1.6	29.1	0.401	28	91.44	15	1	93.5076	0.132387	25	0.511014
12	11.72	125	1082.2	1085	1083.6	2.8	1.6	29.1	0.401	28	91.44	15	1	93.5076	0.132387	25	0.423638
1	9.45	175	922.4	924.4	923.4	2	1.1	28.2	0.06	24	143.52	24	1	0	0.0277778	25	0.152778
2	9.45	175	922.4	924.4	923.4	2	1.1	28.2	0.06	24	143.52	24	1	0	0.0277778	25	0.116111
3	9.45	175	922.4	924.4	923.4	2	1.1	28.2	0.06	24	143.52	24	1	0	0.0277778	25	0.0655556
4	9.45	175	922.4	924.4	923.4	2	1.1	28.2	0.06	24	143.52	24	1	0	0.0277778	25	0.0863889
5	9.45	175	922.4	924.4	923.4	2	1.1	28.2	0.06	24	143.52	24	1	0	0.0277778	25	0.0766667
6	9.45	175	922.4	924.4	923.4	2	1.1	28.2	0.06	24	143.52	24	1	0	0.0277778	25	0.0672222
1	11.4	125	1027.3	1030.6	1028.95	3.3	1.7	31.4	0.352	26	91.2	15	1	93.6887	0.296914	25	4.20133
2	11.4	125	1027.3	1030.6	1028.95	3.3	1.7	31.4	0.352	26	91.2	15	1	93.6887	0.296914	25	0.54929
3	11.4	125	1027.3	1030.6	1028.95	3.3	1.7	31.4	0.352	26	91.2	15	1	93.6887	0.296914	25	0.973877
4	11.4	125	1027.3	1030.6	1028.95	3.3	1.7	31.4	0.352	26	91.2	15	1	93.6887	0.296914	25	0.341451
5	11.4	125	1027.3	1030.6	1028.95	3.3	1.7	31.4	0.352	26	91.2	15	1	93.6887	0.296914	25	0.650241
6	11.4	125	1027.3	1030.6	1028.95	3.3	1.7	31.4	0.352	26	91.2	15	1	93.6887	0.296914	25	0.498815
7	11.4	125	1027.3	1030.6	1028.95	3.3	1.7	31.4	0.352	26	91.2	15	1	93.6887	0.296914	25	0.219716
8	11.4	125	1027.3	1030.6	1028.95	3.3	1.7	31.4	0.352	26	91.2	15	1	93.6887	0.296914	25	0.216747
9	11.4	125	1027.3	1030.6	1028.95	3.3	1.7	31.4	0.352	26	91.2	15	1	93.6887	0.296914	25	0.0950124
1	11.4	125	1036.7	1039.8	1038.25	2.7	1.6	30.3	0.596	26	96.2	15	1	93.6887	0.473157	25	6.69517
2	11.4	125	1036.7	1039.8	1038.25	2.7	1.6	30.3	0.596	26	96.2	15	1	93.6887	0.473157	25	0.87534
3	11.4	125	1036.7	1039.8	1038.25	2.7	1.6	30.3	0.596	26	96.2	15	1	93.6887	0.473157	25	1.55195
4	11.4	125	1036.7	1039.8	1038.25	2.7	1.6	30.3	0.596	26	96.2	15	1	93.6887	0.473157	25	0.54413
5	11.4	125	1036.7	1039.8	1038.25	2.7	1.6	30.3	0.596	26	96.2	15	1	93.6887	0.473157	25	1.03621
6	11.4	125	1036.7	1039.8	1038.25	2.7	1.6	30.3	0.596	26	96.2	15	1	93.6887	0.473157	25	0.794903
7	11.4	125	1036.7	1039.8	1038.25	2.7	1.6	30.3	0.596	26	96.2	15	1	93.6887	0.473157	25	0.350136
8	11.4	125	1036.7	1039.8	1038.25	2.7	1.6	30.3	0.596	26	96.2	15	1	93.6887	0.473157	25	0.345404
9	11.4	125	1036.7	1039.8	1038.25	2.7	1.6	30.3	0.596	26	96.2	15	1	93.6887	0.473157	25	0.15141
1	11.4	125	1051.5	1052.8	1052.15	1.3	0.4	25.7	0.146	30	0	15	1	93.6887	0.0289769	25	0.410023
2	11.4	125	1051.5	1052.8	1052.15	1.3	0.4	25.7	0.146	30	0	15	1	93.6887	0.0289769	25	0.0536072
3	11.4	125	1051.5	1052.8	1052.15	1.3	0.4	25.7	0.146	30	0	15	1	93.6887	0.0289769	25	0.0950442
4	11.4	125	1051.5	1052.8	1052.15	1.3	0.4	25.7	0.146	30	0	15	1	93.6887	0.0289769	25	0.0333234
5	11.4	125	1051.5	1052.8	1052.15	1.3	0.4	25.7	0.146	30	0	15	1	93.6887	0.0289769	25	0.0634594
6	11.4	125	1051.5	1052.8	1052.15	1.3	0.4	25.7	0.146	30	0	15	1	93.6887	0.0289769	25	0.0486812
7	11.4	125	1051.5	1052.8	1052.15	1.3	0.4	25.7	0.146	30	0	15	1	93.6887	0.0289769	25	0.0214429
8	11.4	125	1051.5	1052.8	1052.15	1.3	0.4	25.7	0.146	30	0	15	1	93.6887	0.0289769	25	0.0211531
9	11.4	125	1051.5	1052.8	1052.15	1.3	0.4	25.7	0.146	30	0	15	1	93.6887	0.0289769	25	0.0092726
1	10.8	125	1085.5	1089.1	1087.3	2.2	0.3	27.5	0.107	24	91.2	15	1	80.8707	0.00524587	25.1	0.016472
2	10.8	125	1085.5	1089.1	1087.3	2.2	0.3	27.5	0.107	24	91.2	15	1	80.8707	0.00524587	25.1	0.0424391
3	10.8	125	1085.5	1089.1	1087.3	2.2	0.3	27.5	0.107	24	91.2	15	1	80.8707	0.00524587	25.1	0.0421768
4	10.8	125	1085.5	1089.1	1087.3	2.2	0.3	27.5	0.107	24	91.2	15	1	80.8707	0.00524587	25.1	0.0327342
5	10.8	125	1085.5	1089.1	1087.3	2.2	0.3	27.5	0.107	24	91.2	15	1	80.8707	0.00524587	25.1	0.0324719
6	10.8	125	1085.5	1089.1	1087.3	2.2	0.3	27.5	0.107	24	91.2	15	1	80.8707	0.00524587	25.1	0.0350424
7	10.8	125	1085.5	1089.1	1087.3	2.2	0.3	27.5	0.107	24	91.2	15	1	80.8707	0.00524587	25.1	0.0278031
8	10.8	125	1085.5	1089.1	1087.3	2.2	0.3	27.5	0.107	24	91.2	15	1	80.8707	0.00524587	25.1	0.0277506
9	10.8	125	1085.5	1089.1	1087.3	2.2	0.3	27.5	0.107	24	91.2	15	1	80.8707	0.00524587	25.1	0.0282228
10	10.8	125	1085.5	1089.1	1087.3	2.2	0.3	27.5	0.107	24	91.2	15	1	80.8707	0.00524587	25.1	0.0243408
11	10.8	125	1085.5	1089.1	1087.3	2.2	0.3	27.5	0.107	24	91.2	15	1	80.8707	0.00524587	25.1	0.0201441
12	10.8	125	1085.5	1089.1	1087.3	2.2	0.3	27.5	0.107	24	91.2	15	1	80.8707	0.00524587	25.1	0.0230818
1	10.8	125	1123.3	1128.2	1125.75	3.8	0.5	29.5	0.238	21	91.44	15	1	80.8707	0.0194473	25.1	0.0610645
2	10.8	125	1123.3	1128.2	1125.75	3.8	0.5	29.5	0.238	21	91.44	15	1	80.8707	0.0194473	25.1	0.157329
3	10.8	125	1123.3	1128.2	1125.75	3.8	0.5	29.5	0.238	21	91.44	15	1	80.8707	0.0194473	25.1	0.156356
4	10.8	125	1123.3	1128.2	1125.75	3.8	0.5	29.5	0.238	21	91.44	15	1	80.8707	0.0194473	25.1	0.121351
5	10.8	125	1123.3	1128.2	1125.75	3.8	0.5	29.5	0.238	21	91.44	15	1	80.8707	0.0194473	25.1	0.120379
6	10.8	125	1123.3	1128.2	1125.75	3.8	0.5	29.5	0.238	21	91.44	15	1	80.8707	0.0194473	25.1	0.129908
7	10.8	125	1123.3	1128.2	1125.75	3.8	0.5	29.5	0.238	21	91.44	15	1	80.8707	0.0194473	25.1	0.103071
8	10.8	125	1123.3	1128.2	1125.75	3.8	0.5	29.5	0.238	21	91.44	15	1	80.8707	0.0194473	25.1	0.102876
9	10.8	125	1123.3	1128.2	1125.75	3.8	0.5	29.5	0.238	21	91.44	15	1	80.8707	0.0194473	25.1	0.104626
10	10.8	125	1123.3	1128.2	1125.75	3.8	0.5	29.5	0.238	21	91.44	15	1	80.8707	0.0194473	25.1	0.0902355
11	10.8	125	1123.3	1128.2	1125.75	3.8	0.5	29.5	0.238	21	91.44	15	1	80.8707	0.0194473	25.1	0.0746776
12	10.8	125	1123.3	1128.2	1125.75	3.8	0.5	29.5	0.238	21	91.44	15	1	80.8707	0.0194473	25.1	0.0855681
1	10.8	125	1134.2	1137.1	1135.65	2.9	1.8	30.4	0.309	21	91.44	15	1	80.8707	0.0908957	25.1	0.285413
2	10.8	125	1134.2	1137.1	1135.65	2.9	1.8	30.4	0.309	21	91.44	15	1	80.8707	0.0908957	25.1	0.735346
3	10.8	125	1134.2	1137.1	1135.65	2.9	1.8	30.4	0.309	21	91.44	15	1	80.8707	0.0908957	25.1	0.730802
4	10.8	125	1134.2	1137.1	1135.65	2.9	1.8	30.4	0.309	21	91.44	15	1	80.8707	0.0908957	25.1	0.567189
5	10.8	125	1134.2	1137.1	1135.65	2.9	1.8	30.4	0.309	21	91.44	15	1	80.8707	0.0908957	25.1	0.562645
6	10.8	125	1134.2	1137.1	1135.65	2.9	1.8	30.4	0.309	21	91.44	15	1	80.8707	0.0908957	25.1	0.607183
7	10.8	125	1134.2	1137.1	1135.65	2.9	1.8	30.4	0.309	21	91.44	15	1	80.8707	0.0908957	25.1	0.481747
8	10.8	125	1134.2	1137.1	1135.65	2.9	1.8	30.4	0.309	21	91.44	15	1	80.8707	0.0908957	25.1	0.480838
9	10.8	125	1134.2	1137.1	1135.65	2.9	1.8	30.4	0.309	21	91.44	15	1	80.8707	0.0908957	25.1	0.489019
10	10.8	125	1134.2	1137.1	1135.65	2.9	1.8	30.4	0.309	21	91.44	15	1	80.8707	0.0908957	25.1	0.421756
11	10.8	125	1134.2	1137.1	1135.65	2.9	1.8	30.4	0.309	21	91.44	15	1	80.8707	0.0908957	25.1	0.34904
12	10.8	125	1134.2	1137.1	1135.65	2.9	1.8	30.4	0.309	21	91.44	15	1	80.8707	0.0908957	25.1	0.399941
1	10.8	125	1142	1143.8	1142.9	1.8	0.9	28.4	0.29	24	91.44	15	1	80.8707	0.0426533	25.1	0.133931
2	10.8	125	1142	1143.8	1142.9	1.8	0.9	28.4	0.29	24	91.44	15	1	80.8707	0.0426533	25.1	0.345065
3	10.8	125	1142	1143.8	1142.9	1.8	0.9	28.4	0.29	24	91.44	15	1	80.8707	0.0426533	25.1	0.342933
4	10.8	125	1142	1143.8	1142.9	1.8	0.9	28.4	0.29	24	91.44	15	1	80.8707	0.0426533	25.1	0.266157
5	10.8	125	1142	1143.8	1142.9	1.8	0.9	28.4	0.29	24	91.44	15	1	80.8707	0.0426533	25.1	0.264024
6	10.8	125	1142	1143.8	1142.9	1.8	0.9	28.4	0.29	24	91.44	15	1	80.8707	0.0426533	25.1	0.284924
7	10.8	125	1142	1143.8	1142.9	1.8	0.9	28.4	0.29	24	91.44	15	1	80.8707	0.0426533	25.1	0.226063
8	10.8	125	1142	1143.8	1142.9	1.8	0.9	28.4	0.29	24	91.44	15	1	80.8707	0.0426533	25.1	0.225636
9	10.8	125	1142	1143.8	1142.9	1.8	0.9	28.4	0.29	24	91.44	15	1	80.8707	0.0426533	25.1	0.229475
10	10.8	125	1142	1143.8	1142.9	1.8	0.9	28.4	0.29	24	91.44	15	1	80.8707	0.0426533	25.1	0.197911
11	10.8	125	1142	1143.8	1142.9	1.8	0.9	28.4	0.29	24	91.44	15	1	80.8707	0.0426533	25.1	0.163789
12	10.8	125	1142	1143.8	1142.9	1.8	0.9	28.4	0.29	24	91.44	15	1	80.8707	0.0426533	25.1	0.187675
1	10.8	125	1118.7	1124	1121.35	4.7	2.7	30.2	0.402	23	91.44	15	1	73.1792	1	25.1	6.3
2	10.8	125	1118.7	1124	1121.35	4.7	2.7	30.2	0.402	23	91.44	15	1	73.1792	1	25.1	7.93
3	10.8	125	1118.7	1124	1121.35	4.7	2.7	30.2	0.402	23	91.44	15	1	73.1792	1	25.1	6.14
4	10.8	125	1118.7	1124	1121.35	4.7	2.7	30.2	0.402	23	91.44	15	1	73.1792	1	25.1	6.11
5	10.8	125	1118.7	1124	1121.35	4.7	2.7	30.2	0.402	23	91.44	15	1	73.1792	1	25.1	4.24
6	10.8	125	1118.7	1124	1121.35	4.7	2.7	30.2	0.402	23	91.44	15	1	73.1792	1	25.1	1.03
7	10.8	125	1118.7	1124	1121.35	4.7	2.7	30.2	0.402	23	91.44	15	1	73.1792	1	25.1	1.07
8	10.8	125	1118.7	1124	1121.35	4.7	2.7	30.2	0.402	23	91.44	15	1	73.1792	1	25.1	1.97
9	10.8	125	1118.7	1124	1121.35	4.7	2.7	30.2	0.402	23	91.44	15	1	73.1792	1	25.1	1.79
1	10.8	125	1124.3	1125.7	1125	1.4	1.3	29.1	0.393	32	91.68	15	1	95.6301	0.448276	25	0.313793
2	10.8	125	1124.3	1125.7	1125	1.4	1.3	29.1	0.393	32	91.68	15	1	95.6301	0.448276	25	1.60483
3	10.8	125	1124.3	1125.7	1125	1.4	1.3	29.1	0.393	32	91.68	15	1	95.6301	0.448276	25	1.4031
4	10.8	125	1124.3	1125.7	1125	1.4	1.3	29.1	0.393	32	91.68	15	1	95.6301	0.448276	25	1.68103
5	10.8	125	1124.3	1125.7	1125	1.4	1.3	29.1	0.393	32	91.68	15	1	95.6301	0.448276	25	1.00414
6	10.8	125	1124.3	1125.7	1125	1.4	1.3	29.1	0.393	32	91.68	15	1	95.6301	0.448276	25	0.13
7	10.8	125	1124.3	1125.7	1125	1.4	1.3	29.1	0.393	32	91.68	15	1	95.6301	0.448276	25	0.165862
8	10.8	125	1124.3	1125.7	1125	1.4	1.3	29.1	0.393	32	91.68	15	1	95.6301	0.448276	25	0.582759
9	10.8	125	1124.3	1125.7	1125	1.4	1.3	29.1	0.393	32	91.68	15	1	95.6301	0.448276	25	0.43931
10	10.8	125	1124.3	1125.7	1125	1.4	1.3	29.1	0.393	32	91.68	15	1	95.6301	0.448276	25	0.591724
11	10.8	125	1124.3	1125.7	1125	1.4	1.3	29.1	0.393	32	91.68	15	1	95.6301	0.448276	25	0.30931
1	10.8	125	1127.5	1133.4	1130.45	5.4	1.6	29.2	0.393	32	91.68	15	1	95.6301	0.551724	25	0.386207
2	10.8	125	1127.5	1133.4	1130.45	5.4	1.6	29.2	0.393	32	91.68	15	1	95.6301	0.551724	25	1.97517
3	10.8	125	1127.5	1133.4	1130.45	5.4	1.6	29.2	0.393	32	91.68	15	1	95.6301	0.551724	25	1.7269
4	10.8	125	1127.5	1133.4	1130.45	5.4	1.6	29.2	0.393	32	91.68	15	1	95.6301	0.551724	25	2.06897
5	10.8	125	1127.5	1133.4	1130.45	5.4	1.6	29.2	0.393	32	91.68	15	1	95.6301	0.551724	25	1.23586
6	10.8	125	1127.5	1133.4	1130.45	5.4	1.6	29.2	0.393	32	91.68	15	1	95.6301	0.551724	25	0.16
7	10.8	125	1127.5	1133.4	1130.45	5.4	1.6	29.2	0.393	32	91.68	15	1	95.6301	0.551724	25	0.204138
8	10.8	125	1127.5	1133.4	1130.45	5.4	1.6	29.2	0.393	32	91.68	15	1	95.6301	0.551724	25	0.717241
9	10.8	125	1127.5	1133.4	1130.45	5.4	1.6	29.2	0.393	32	91.68	15	1	95.6301	0.551724	25	0.54069
10	10.8	125	1127.5	1133.4	1130.45	5.4	1.6	29.2	0.393	32	91.68	15	1	95.6301	0.551724	25	0.728276
11	10.8	125	1127.5	1133.4	1130.45	5.4	1.6	29.2	0.393	32	91.68	15	1	95.6301	0.551724	25	0.38069
1	10.54	125	857.4	865.6	861.5	8.2	7.3	31	0.657	14	61.44	10	1	0	1	25.05	5.94
2	10.54	125	857.4	865.6	861.5	8.2	7.3	31	0.657	14	61.44	10	1	0	1	25.05	6.02
3	10.54	125	857.4	865.6	861.5	8.2	7.3	31	0.657	14	61.44	10	1	0	1	25.05	6.01
4	10.54	125	857.4	865.6	861.5	8.2	7.3	31	0.657	14	61.44	10	1	0	1	25.05	4.55
5	10.54	125	857.4	865.6	861.5	8.2	7.3	31	0.657	14	61.44	10	1	0	1	25.05	3.21
6	10.54	125	857.4	865.6	861.5	8.2	7.3	31	0.657	14	61.44	10	1	0	1	25.05	3.76
7	10.54	125	857.4	865.6	861.5	8.2	7.3	31	0.657	14	61.44	10	1	0	1	25.05	3.78
8	10.54	125	857.4	865.6	861.5	8.2	7.3	31	0.657	14	61.44	10	1	0	1	25.05	3.45
9	10.54	125	857.4	865.6	861.5	8.2	7.3	31	0.657	14	61.44	10	1	0	1	25.05	2.15
10	10.54	125	857.4	865.6	861.5	8.2	7.3	31	0.657	14	61.44	10	1	0	1	25.05	3.32
11	10.54	125	857.4	865.6	861.5	8.2	7.3	31	0.657	14	61.44	10	1	0	1	25.05	3.11
12	10.54	125	857.4	865.6	861.5	8.2	7.3	31	0.657	14	61.44	10	1	0	1	25.05	3.4
1	10.8	125	1101.3	1107.9	1104.6	6.6	6	29.6	0.794	24	74.16	12	1	97.5341	0.814986	25	1.42623
2	10.8	125	1101.3	1107.9	1104.6	6.6	6	29.6	0.794	24	74.16	12	1	97.5341	0.814986	25	1.62997
3	10.8	125	1101.3	1107.9	1104.6	6.6	6	29.6	0.794	24	74.16	12	1	97.5341	0.814986	25	1.18173
4	10.8	125	1101.3	1107.9	1104.6	6.6	6	29.6	0.794	24	74.16	12	1	97.5341	0.814986	25	1.51587
5	10.8	125	1101.3	1107.9	1104.6	6.6	6	29.6	0.794	24	74.16	12	1	97.5341	0.814986	25	2.28196
6	10.8	125	1101.3	1107.9	1104.6	6.6	6	29.6	0.794	24	74.16	12	1	97.5341	0.814986	25	2.31456
7	10.8	125	1101.3	1107.9	1104.6	6.6	6	29.6	0.794	24	74.16	12	1	97.5341	0.814986	25	1.35288
8	10.8	125	1101.3	1107.9	1104.6	6.6	6	29.6	0.794	24	74.16	12	1	97.5341	0.814986	25	1.47512
9	10.8	125	1101.3	1107.9	1104.6	6.6	6	29.6	0.794	24	74.16	12	1	97.5341	0.814986	25	0.920934
10	10.8	125	1101.3	1107.9	1104.6	6.6	6	29.6	0.794	24	74.16	12	1	97.5341	0.814986	25	0.692738
11	10.8	125	1101.3	1107.9	1104.6	6.6	6	29.6	0.794	24	74.16	12	1	97.5341	0.814986	25	0.220046
1	10.8	200	1106	1107.3	1106.65	1.3	0.9	31.3	0.991	32	39.12	6	1	97.6899	0.120664	25	0.828962
2	10.8	200	1106	1107.3	1106.65	1.3	0.9	31.3	0.991	32	39.12	6	1	97.6899	0.120664	25	0.225642
3	10.8	200	1106	1107.3	1106.65	1.3	0.9	31.3	0.991	32	39.12	6	1	97.6899	0.120664	25	0.187029
4	10.8	200	1106	1107.3	1106.65	1.3	0.9	31.3	0.991	32	39.12	6	1	97.6899	0.120664	25	0.311313
5	10.8	200	1106	1107.3	1106.65	1.3	0.9	31.3	0.991	32	39.12	6	1	97.6899	0.120664	25	0.179789
6	10.8	200	1106	1107.3	1106.65	1.3	0.9	31.3	0.991	32	39.12	6	1	97.6899	0.120664	25	0.250981
7	10.8	200	1106	1107.3	1106.65	1.3	0.9	31.3	0.991	32	39.12	6	1	97.6899	0.120664	25	0.217195
8	10.8	200	1106	1107.3	1106.65	1.3	0.9	31.3	0.991	32	39.12	6	1	97.6899	0.120664	25	0.117044
9	10.8	200	1106	1107.3	1106.65	1.3	0.9	31.3	0.991	32	39.12	6	1	97.6899	0.120664	25	0.173756
10	10.8	200	1106	1107.3	1106.65	1.3	0.9	31.3	0.991	32	39.12	6	1	97.6899	0.120664	25	0.0253394
11	10.8	200	1106	1107.3	1106.65	1.3	0.9	31.3	0.991	32	39.12	6	1	97.6899	0.120664	25	0.0567121
1	10.8	200	1110.6	1112	1111.3	1.4	1	29.1	0.268	28	39.12	6	1	97.6899	0.0362574	25	0.249088
2	10.8	200	1110.6	1112	1111.3	1.4	1	29.1	0.268	28	39.12	6	1	97.6899	0.0362574	25	0.0678013
3	10.8	200	1110.6	1112	1111.3	1.4	1	29.1	0.268	28	39.12	6	1	97.6899	0.0362574	25	0.0561989
4	10.8	200	1110.6	1112	1111.3	1.4	1	29.1	0.268	28	39.12	6	1	97.6899	0.0362574	25	0.093544
5	10.8	200	1110.6	1112	1111.3	1.4	1	29.1	0.268	28	39.12	6	1	97.6899	0.0362574	25	0.0540235
6	10.8	200	1110.6	1112	1111.3	1.4	1	29.1	0.268	28	39.12	6	1	97.6899	0.0362574	25	0.0754153
7	10.8	200	1110.6	1112	1111.3	1.4	1	29.1	0.268	28	39.12	6	1	97.6899	0.0362574	25	0.0652633
8	10.8	200	1110.6	1112	1111.3	1.4	1	29.1	0.268	28	39.12	6	1	97.6899	0.0362574	25	0.0351697
9	10.8	200	1110.6	1112	1111.3	1.4	1	29.1	0.268	28	39.12	6	1	97.6899	0.0362574	25	0.0522106
10	10.8	200	1110.6	1112	1111.3	1.4	1	29.1	0.268	28	39.12	6	1	97.6899	0.0362574	25	0.00761405
11	10.8	200	1110.6	1112	1111.3	1.4	1	29.1	0.268	28	39.12	6	1	97.6899	0.0362574	25	0.017041
1	10.8	200	1134.7	1138.6	1136.65	1.7	0.8	32	0.43	30	74.16	12	1	97.6899	0.0465393	25	0.319725
2	10.8	200	1134.7	1138.6	1136.65	1.7	0.8	32	0.43	30	74.16	12	1	97.6899	0.0465393	25	0.0870285
3	10.8	200	1134.7	1138.6	1136.65	1.7	0.8	32	0.43	30	74.16	12	1	97.6899	0.0465393	25	0.0721359
4	10.8	200	1134.7	1138.6	1136.65	1.7	0.8	32	0.43	30	74.16	12	1	97.6899	0.0465393	25	0.120071
5	10.8	200	1134.7	1138.6	1136.65	1.7	0.8	32	0.43	30	74.16	12	1	97.6899	0.0465393	25	0.0693436
6	10.8	200	1134.7	1138.6	1136.65	1.7	0.8	32	0.43	30	74.16	12	1	97.6899	0.0465393	25	0.0968018
7	10.8	200	1134.7	1138.6	1136.65	1.7	0.8	32	0.43	30	74.16	12	1	97.6899	0.0465393	25	0.0837708
8	10.8	200	1134.7	1138.6	1136.65	1.7	0.8	32	0.43	30	74.16	12	1	97.6899	0.0465393	25	0.0451431
9	10.8	200	1134.7	1138.6	1136.65	1.7	0.8	32	0.43	30	74.16	12	1	97.6899	0.0465393	25	0.0670166
10	10.8	200	1134.7	1138.6	1136.65	1.7	0.8	32	0.43	30	74.16	12	1	97.6899	0.0465393	25	0.00977326
11	10.8	200	1134.7	1138.6	1136.65	1.7	0.8	32	0.43	30	74.16	12	1	97.6899	0.0465393	25	0.0218735
1	10.8	200	1154.3	1157.1	1155.7	2.8	0.5	30.3	0.345	27	74.4	12	1	97.6899	0.0233373	25	0.160327
2	10.8	200	1154.3	1157.1	1155.7	2.8	0.5	30.3	0.345	27	74.4	12	1	97.6899	0.0233373	25	0.0436408
3	10.8	200	1154.3	1157.1	1155.7	2.8	0.5	30.3	0.345	27	74.4	12	1	97.6899	0.0233373	25	0.0361728
4	10.8	200	1154.3	1157.1	1155.7	2.8	0.5	30.3	0.345	27	74.4	12	1	97.6899	0.0233373	25	0.0602102
5	10.8	200	1154.3	1157.1	1155.7	2.8	0.5	30.3	0.345	27	74.4	12	1	97.6899	0.0233373	25	0.0347726
6	10.8	200	1154.3	1157.1	1155.7	2.8	0.5	30.3	0.345	27	74.4	12	1	97.6899	0.0233373	25	0.0485416
7	10.8	200	1154.3	1157.1	1155.7	2.8	0.5	30.3	0.345	27	74.4	12	1	97.6899	0.0233373	25	0.0420071
8	10.8	200	1154.3	1157.1	1155.7	2.8	0.5	30.3	0.345	27	74.4	12	1	97.6899	0.0233373	25	0.0226372
9	10.8	200	1154.3	1157.1	1155.7	2.8	0.5	30.3	0.345	27	74.4	12	1	97.6899	0.0233373	25	0.0336057
10	10.8	200	1154.3	1157.1	1155.7	2.8	0.5	30.3	0.345	27	74.4	12	1	97.6899	0.0233373	25	0.00490083
11	10.8	200	1154.3	1157.1	1155.7	2.8	0.5	30.3	0.345	27	74.4	12	1	97.6899	0.0233373	25	0.0109685
1	9.83	175	945.3	952	948.65	6.2	4.8	30.8	0.642	22	143.76	24	1	90.9227	0.969941	24.94	0.717756
2	9.83	175	945.3	952	948.65	6.2	4.8	30.8	0.642	22	143.76	24	1	90.9227	0.969941	24.94	0.203688
3	9.83	175	945.3	952	948.65	6.2	4.8	30.8	0.642	22	143.76	24	1	90.9227	0.969941	24.94	9.74791
4	9.83	175	945.3	952	948.65	6.2	4.8	30.8	0.642	22	143.76	24	1	90.9227	0.969941	24.94	7.43945
5	9.83	175	945.3	952	948.65	6.2	4.8	30.8	0.642	22	143.76	24	1	90.9227	0.969941	24.94	8.82646
6	9.83	175	945.3	952	948.65	6.2	4.8	30.8	0.642	22	143.76	24	1	90.9227	0.969941	24.94	13.8799
7	9.83	175	945.3	952	948.65	6.2	4.8	30.8	0.642	22	143.76	24	1	90.9227	0.969941	24.94	13.7829
8	9.83	175	945.3	952	948.65	6.2	4.8	30.8	0.642	22	143.76	24	1	90.9227	0.969941	24.94	13.1039
9	9.83	175	945.3	952	948.65	6.2	4.8	30.8	0.642	22	143.76	24	1	90.9227	0.969941	24.94	11.3871
10	9.83	175	945.3	952	948.65	6.2	4.8	30.8	0.642	22	143.76	24	1	90.9227	0.969941	24.94	7.76923
11	9.83	175	945.3	952	948.65	6.2	4.8	30.8	0.642	22	143.76	24	1	90.9227	0.969941	24.94	8.93316
12	9.83	175	945.3	952	948.65	6.2	4.8	30.8	0.642	22	143.76	24	1	90.9227	0.969941	24.94	6.42101
1	9.83	175	953.3	954.5	953.9	1.2	0.5	28.3	0.191	23	143.76	24	1	90.9227	0.0300589	24.94	0.0222436
2	9.83	175	953.3	954.5	953.9	1.2	0.5	28.3	0.191	23	143.76	24	1	90.9227	0.0300589	24.94	0.00631236
3	9.83	175	953.3	954.5	953.9	1.2	0.5	28.3	0.191	23	143.76	24	1	90.9227	0.0300589	24.94	0.302092
4	9.83	175	953.3	954.5	953.9	1.2	0.5	28.3	0.191	23	143.76	24	1	90.9227	0.0300589	24.94	0.230551
5	9.83	175	953.3	954.5	953.9	1.2	0.5	28.3	0.191	23	143.76	24	1	90.9227	0.0300589	24.94	0.273536
6	9.83	175	953.3	954.5	953.9	1.2	0.5	28.3	0.191	23	143.76	24	1	90.9227	0.0300589	24.94	0.430142
7	9.83	175	953.3	954.5	953.9	1.2	0.5	28.3	0.191	23	143.76	24	1	90.9227	0.0300589	24.94	0.427136
8	9.83	175	953.3	954.5	953.9	1.2	0.5	28.3	0.191	23	143.76	24	1	90.9227	0.0300589	24.94	0.406095
9	9.83	175	953.3	954.5	953.9	1.2	0.5	28.3	0.191	23	143.76	24	1	90.9227	0.0300589	24.94	0.352891
10	9.83	175	953.3	954.5	953.9	1.2	0.5	28.3	0.191	23	143.76	24	1	90.9227	0.0300589	24.94	0.240771
11	9.83	175	953.3	954.5	953.9	1.2	0.5	28.3	0.191	23	143.76	24	1	90.9227	0.0300589	24.94	0.276842
12	9.83	175	953.3	954.5	953.9	1.2	0.5	28.3	0.191	23	143.76	24	1	90.9227	0.0300589	24.94	0.19899
1	11.72	125	1016.5	1017.8	1017.15	1.3	1.2	30.4	0.472	20	114.48	19	1	95.9821	0.209863	25.03	0.298006
2	11.72	125	1016.5	1017.8	1017.15	1.3	1.2	30.4	0.472	20	114.48	19	1	95.9821	0.209863	25.03	0.247639
3	11.72	125	1016.5	1017.8	1017.15	1.3	1.2	30.4	0.472	20	114.48	19	1	95.9821	0.209863	25.03	0.331584
4	11.72	125	1016.5	1017.8	1017.15	1.3	1.2	30.4	0.472	20	114.48	19	1	95.9821	0.209863	25.03	0.530954
5	11.72	125	1016.5	1017.8	1017.15	1.3	1.2	30.4	0.472	20	114.48	19	1	95.9821	0.209863	25.03	0.7681
6	11.72	125	1016.5	1017.8	1017.15	1.3	1.2	30.4	0.472	20	114.48	19	1	95.9821	0.209863	25.03	1.00105
7	11.72	125	1016.5	1017.8	1017.15	1.3	1.2	30.4	0.472	20	114.48	19	1	95.9821	0.209863	25.03	0.954878
8	11.72	125	1016.5	1017.8	1017.15	1.3	1.2	30.4	0.472	20	114.48	19	1	95.9821	0.209863	25.03	0.79748
9	11.72	125	1016.5	1017.8	1017.15	1.3	1.2	30.4	0.472	20	114.48	19	1	95.9821	0.209863	25.03	0.556138
10	11.72	125	1016.5	1017.8	1017.15	1.3	1.2	30.4	0.472	20	114.48	19	1	95.9821	0.209863	25.03	0.528855
11	11.72	125	1016.5	1017.8	1017.15	1.3	1.2	30.4	0.472	20	114.48	19	1	95.9821	0.209863	25.03	0.640083
12	11.72	125	1016.5	1017.8	1017.15	1.3	1.2	30.4	0.472	20	114.48	19	1	95.9821	0.209863	25.03	0.509968
1	11.72	125	1021.1	1024.2	1022.65	2.1	0.5	29.7	0.473	19	114.48	19	1	95.9821	0.0876283	25.03	0.124432
2	11.72	125	1021.1	1024.2	1022.65	2.1	0.5	29.7	0.473	19	114.48	19	1	95.9821	0.0876283	25.03	0.103401
3	11.72	125	1021.1	1024.2	1022.65	2.1	0.5	29.7	0.473	19	114.48	19	1	95.9821	0.0876283	25.03	0.138453
4	11.72	125	1021.1	1024.2	1022.65	2.1	0.5	29.7	0.473	19	114.48	19	1	95.9821	0.0876283	25.03	0.2217
5	11.72	125	1021.1	1024.2	1022.65	2.1	0.5	29.7	0.473	19	114.48	19	1	95.9821	0.0876283	25.03	0.32072
6	11.72	125	1021.1	1024.2	1022.65	2.1	0.5	29.7	0.473	19	114.48	19	1	95.9821	0.0876283	25.03	0.417987
7	11.72	125	1021.1	1024.2	1022.65	2.1	0.5	29.7	0.473	19	114.48	19	1	95.9821	0.0876283	25.03	0.398709
8	11.72	125	1021.1	1024.2	1022.65	2.1	0.5	29.7	0.473	19	114.48	19	1	95.9821	0.0876283	25.03	0.332988
9	11.72	125	1021.1	1024.2	1022.65	2.1	0.5	29.7	0.473	19	114.48	19	1	95.9821	0.0876283	25.03	0.232215
10	11.72	125	1021.1	1024.2	1022.65	2.1	0.5	29.7	0.473	19	114.48	19	1	95.9821	0.0876283	25.03	0.220823
11	11.72	125	1021.1	1024.2	1022.65	2.1	0.5	29.7	0.473	19	114.48	19	1	95.9821	0.0876283	25.03	0.267266
12	11.72	125	1021.1	1024.2	1022.65	2.1	0.5	29.7	0.473	19	114.48	19	1	95.9821	0.0876283	25.03	0.212937
1	11.72	125	1026	1027.1	1026.55	1.1	0.2	26.4	0.03	34	114.48	19	1	95.9821	0.00222313	25.03	0.00315684
2	11.72	125	1026	1027.1	1026.55	1.1	0.2	26.4	0.03	34	114.48	19	1	95.9821	0.00222313	25.03	0.00262329
3	11.72	125	1026	1027.1	1026.55	1.1	0.2	26.4	0.03	34	114.48	19	1	95.9821	0.00222313	25.03	0.00351254
4	11.72	125	1026	1027.1	1026.55	1.1	0.2	26.4	0.03	34	114.48	19	1	95.9821	0.00222313	25.03	0.00562451
5	11.72	125	1026	1027.1	1026.55	1.1	0.2	26.4	0.03	34	114.48	19	1	95.9821	0.00222313	25.03	0.00813665
6	11.72	125	1026	1027.1	1026.55	1.1	0.2	26.4	0.03	34	114.48	19	1	95.9821	0.00222313	25.03	0.0106043
7	11.72	125	1026	1027.1	1026.55	1.1	0.2	26.4	0.03	34	114.48	19	1	95.9821	0.00222313	25.03	0.0101152
8	11.72	125	1026	1027.1	1026.55	1.1	0.2	26.4	0.03	34	114.48	19	1	95.9821	0.00222313	25.03	0.00844789
9	11.72	125	1026	1027.1	1026.55	1.1	0.2	26.4	0.03	34	114.48	19	1	95.9821	0.00222313	25.03	0.00589129
10	11.72	125	1026	1027.1	1026.55	1.1	0.2	26.4	0.03	34	114.48	19	1	95.9821	0.00222313	25.03	0.00560228
11	11.72	125	1026	1027.1	1026.55	1.1	0.2	26.4	0.03	34	114.48	19	1	95.9821	0.00222313	25.03	0.00678054
12	11.72	125	1026	1027.1	1026.55	1.1	0.2	26.4	0.03	34	114.48	19	1	95.9821	0.00222313	25.03	0.0054022
1	8.67	175	912.6	916.6	914.6	4	3.6	29.7	0.18	19	95.72	15	1	95.2618	0.109109	25	0.65902
2	8.67	175	912.6	916.6	914.6	4	3.6	29.7	0.18	19	95.72	15	1	90.8213	0.109109	25	0.628469
3	8.67	175	912.6	916.6	914.6	4	3.6	29.7	0.18	19	95.72	15	1	95.2618	0.109109	25	1.22312
4	8.67	175	912.6	916.6	914.6	4	3.6	29.7	0.18	19	95.72	15	1	90.8213	0.109109	25	0.508449
5	8.67	175	912.6	916.6	914.6	4	3.6	29.7	0.18	19	95.72	15	1	95.2618	0.109109	25	0.551002
6	8.67	175	912.6	916.6	914.6	4	3.6	29.7	0.18	19	95.72	15	1	90.8213	0.109109	25	0.364425
7	8.67	175	912.6	916.6	914.6	4	3.6	29.7	0.18	19	95.72	15	1	95.2618	0.109109	25	0.437528
8	8.67	175	912.6	916.6	914.6	4	3.6	29.7	0.18	19	95.72	15	1	95.2618	0.109109	25	0.226947
9	8.67	175	912.6	916.6	914.6	4	3.6	29.7	0.18	19	95.72	15	1	95.2618	0.109109	25	0.28914
1	8.67	175	918.2	922	920.1	3.8	3.5	29	0.13	17	90.96	15	1	95.2618	0.0766122	25	0.462738
2	8.67	175	918.2	922	920.1	3.8	3.5	29	0.13	17	90.96	15	1	90.8213	0.0766122	25	0.441286
3	8.67	175	918.2	922	920.1	3.8	3.5	29	0.13	17	90.96	15	1	95.2618	0.0766122	25	0.858823
4	8.67	175	918.2	922	920.1	3.8	3.5	29	0.13	17	90.96	15	1	90.8213	0.0766122	25	0.357013
5	8.67	175	918.2	922	920.1	3.8	3.5	29	0.13	17	90.96	15	1	95.2618	0.0766122	25	0.386892
6	8.67	175	918.2	922	920.1	3.8	3.5	29	0.13	17	90.96	15	1	90.8213	0.0766122	25	0.255885
7	8.67	175	918.2	922	920.1	3.8	3.5	29	0.13	17	90.96	15	1	95.2618	0.0766122	25	0.307215
8	8.67	175	918.2	922	920.1	3.8	3.5	29	0.13	17	90.96	15	1	95.2618	0.0766122	25	0.159353
9	8.67	175	918.2	922	920.1	3.8	3.5	29	0.13	17	90.96	15	1	95.2618	0.0766122	25	0.203022
1	8.67	175	890.5	898	894.25	7	5.2	29.3	0.93	20	114.48	19	1	90.8213	0.814278	24.87	1.89727
2	8.67	175	890.5	898	894.25	7	5.2	29.3	0.93	20	114.48	19	1	95.2618	0.814278	24.87	7.71122
3	8.67	175	890.5	898	894.25	7	5.2	29.3	0.93	20	114.48	19	1	90.8213	0.814278	24.87	6.10709
4	8.67	175	890.5	898	894.25	7	5.2	29.3	0.93	20	114.48	19	1	95.2618	0.814278	24.87	6.81551
5	8.67	175	890.5	898	894.25	7	5.2	29.3	0.93	20	114.48	19	1	90.8213	0.814278	24.87	1.09113
6	8.67	175	890.5	898	894.25	7	5.2	29.3	0.93	20	114.48	19	1	95.2618	0.814278	24.87	5.74066
7	8.67	175	890.5	898	894.25	7	5.2	29.3	0.93	20	114.48	19	1	90.8213	0.814278	24.87	0.244284
8	8.67	175	890.5	898	894.25	7	5.2	29.3	0.93	20	114.48	19	1	95.2618	0.814278	24.87	1.47384
9	8.67	175	890.5	898	894.25	7	5.2	29.3	0.93	20	114.48	19	1	95.2618	0.814278	24.87	1.48199
10	8.67	175	890.5	898	894.25	7	5.2	29.3	0.93	20	114.48	19	1	95.2618	0.814278	24.87	2.43469
1	10.48	175	901.2	904.7	902.95	3.5	2.5	29.8	0.484	23	143.92	24	1	85.8151	0.499216	24.91	2.1017
2	10.48	175	901.2	904.7	902.95	3.5	2.5	29.8	0.484	23	143.92	24	1	85.8151	0.499216	24.91	1.04336
3	10.48	175	901.2	904.7	902.95	3.5	2.5	29.8	0.484	23	143.92	24	1	85.8151	0.499216	24.91	1.55755
4	10.48	175	901.2	904.7	902.95	3.5	2.5	29.8	0.484	23	143.92	24	1	85.8151	0.499216	24.91	2.94038
5	10.48	175	901.2	904.7	902.95	3.5	2.5	29.8	0.484	23	143.92	24	1	85.8151	0.499216	24.91	2.00685
6	10.48	175	901.2	904.7	902.95	3.5	2.5	29.8	0.484	23	143.92	24	1	85.8151	0.499216	24.91	3.19998
7	10.48	175	901.2	904.7	902.95	3.5	2.5	29.8	0.484	23	143.92	24	1	85.8151	0.499216	24.91	2.20654
8	10.48	175	901.2	904.7	902.95	3.5	2.5	29.8	0.484	23	143.92	24	1	85.8151	0.499216	24.91	1.31793
9	10.48	175	901.2	904.7	902.95	3.5	2.5	29.8	0.484	23	143.92	24	1	85.8151	0.499216	24.91	1.20311
10	10.48	175	901.2	904.7	902.95	3.5	2.5	29.8	0.484	23	143.92	24	1	85.8151	0.499216	24.91	1.41278
11	10.48	175	901.2	904.7	902.95	3.5	2.5	29.8	0.484	23	143.92	24	1	85.8151	0.499216	24.91	0.0998432
1	10.48	175	906.1	906.9	906.5	0.8	0.7	28.1	0.303	26	91	15	1	85.8151	0.0875072	24.95	0.368405
2	10.48	175	906.1	906.9	906.5	0.8	0.7	28.1	0.303	26	91	15	1	85.8151	0.0875072	24.95	0.18289
3	10.48	175	906.1	906.9	906.5	0.8	0.7	28.1	0.303	26	91	15	1	85.8151	0.0875072	24.95	0.273023
4	10.48	175	906.1	906.9	906.5	0.8	0.7	28.1	0.303	26	91	15	1	85.8151	0.0875072	24.95	0.515418
5	10.48	175	906.1	906.9	906.5	0.8	0.7	28.1	0.303	26	91	15	1	85.8151	0.0875072	24.95	0.351779
6	10.48	175	906.1	906.9	906.5	0.8	0.7	28.1	0.303	26	91	15	1	85.8151	0.0875072	24.95	0.560921
7	10.48	175	906.1	906.9	906.5	0.8	0.7	28.1	0.303	26	91	15	1	85.8151	0.0875072	24.95	0.386782
8	10.48	175	906.1	906.9	906.5	0.8	0.7	28.1	0.303	26	91	15	1	85.8151	0.0875072	24.95	0.231019
9	10.48	175	906.1	906.9	906.5	0.8	0.7	28.1	0.303	26	91	15	1	85.8151	0.0875072	24.95	0.210892
10	10.48	175	906.1	906.9	906.5	0.8	0.7	28.1	0.303	26	91	15	1	85.8151	0.0875072	24.95	0.247645
11	10.48	175	906.1	906.9	906.5	0.8	0.7	28.1	0.303	26	91	15	1	85.8151	0.0875072	24.95	0.0175014
1	9.45	125	940.6	942.3	941.45	1.7	1	29.7	0.532	21	90.72	14.5	1	92.7579	0.0525147	25	0.148091
2	9.45	125	940.6	942.3	941.45	1.7	1	29.7	0.532	21	90.72	14.5	1	92.7579	0.0525147	25	0.686367
3	9.45	125	940.6	942.3	941.45	1.7	1	29.7	0.532	21	90.72	14.5	1	92.7579	0.0525147	25	0.333468
4	9.45	125	940.6	942.3	941.45	1.7	1	29.7	0.532	21	90.72	14.5	1	92.7579	0.0525147	25	0.0131287
1	9.45	125	992.7	999	995.85	5.3	3.3	30.8	0.81	0	0	0	1	92.7579	0.263857	0	0.744076
2	9.45	125	992.7	999	995.85	5.3	3.3	30.8	0.81	0	0	0	1	92.7579	0.263857	0	3.44861
3	9.45	125	992.7	999	995.85	5.3	3.3	30.8	0.81	0	0	0	1	92.7579	0.263857	0	1.67549
4	9.45	125	992.7	999	995.85	5.3	3.3	30.8	0.81	0	0	0	1	92.7579	0.263857	0	0.0659642
1	8.98	175	907.4	911.1	909.25	2.5	0.9	29.5	0.464	33	137.48	23	1	93.5997	0.104672	25.01	0.715957
2	8.98	175	907.4	911.1	909.25	2.5	0.9	29.5	0.464	33	137.48	23	1	93.5997	0.104672	25.01	0.617566
3	8.98	175	907.4	911.1	909.25	2.5	0.9	29.5	0.464	33	137.48	23	1	93.5997	0.104672	25.01	0.75678
4	8.98	175	907.4	911.1	909.25	2.5	0.9	29.5	0.464	33	137.48	23	1	93.5997	0.104672	25.01	0.646874
5	8.98	175	907.4	911.1	909.25	2.5	0.9	29.5	0.464	33	137.48	23	1	93.5997	0.104672	25.01	0.575697
6	8.98	175	907.4	911.1	909.25	2.5	0.9	29.5	0.464	33	137.48	23	1	93.5997	0.104672	25.01	0.505566
7	8.98	175	907.4	911.1	909.25	2.5	0.9	29.5	0.464	33	137.48	23	1	93.5997	0.104672	25.01	0.550575
8	8.98	175	907.4	911.1	909.25	2.5	0.9	29.5	0.464	33	137.48	23	1	93.5997	0.104672	25.01	0.624893
9	8.98	175	907.4	911.1	909.25	2.5	0.9	29.5	0.464	33	137.48	23	1	93.5997	0.104672	25.01	0.529641
10	8.98	175	907.4	911.1	909.25	2.5	0.9	29.5	0.464	33	137.48	23	1	93.5997	0.104672	25.01	0.320297
11	8.98	175	907.4	911.1	909.25	2.5	0.9	29.5	0.464	33	137.48	23	1	93.5997	0.104672	25.01	0.305643
1	9.73	175	976.4	978.5	977.45	2.1	0.6	29.5	0.378	28	143.92	24	1	92.7965	0.0496389	24.98	0.218907
2	9.73	175	976.4	978.5	977.45	2.1	0.6	29.5	0.378	28	143.92	24	1	92.7965	0.0496389	24.98	0.0997741
3	9.73	175	976.4	978.5	977.45	2.1	0.6	29.5	0.378	28	143.92	24	1	92.7965	0.0496389	24.98	0.0565883
4	9.73	175	976.4	978.5	977.45	2.1	0.6	29.5	0.378	28	143.92	24	1	92.7965	0.0496389	24.98	0.0660197
5	9.73	175	976.4	978.5	977.45	2.1	0.6	29.5	0.378	28	143.92	24	1	92.7965	0.0496389	24.98	0.0129061
1	11.26	125	1111.5	1116.3	1113.9	4.8	3.8	32.6	0.754	20	53.76	8.5	1	94.5828	0.210008	24.77	0.783329
2	11.26	125	1111.5	1116.3	1113.9	4.8	3.8	32.6	0.754	20	53.76	8.5	1	94.5828	0.210008	24.77	1.27265
3	11.26	125	1111.5	1116.3	1113.9	4.8	3.8	32.6	0.754	20	53.76	8.5	1	94.5828	0.210008	24.77	0.911434
4	11.26	125	1111.5	1116.3	1113.9	4.8	3.8	32.6	0.754	20	53.76	8.5	1	94.5828	0.210008	24.77	0.871533
5	11.26	125	1111.5	1116.3	1113.9	4.8	3.8	32.6	0.754	20	53.76	8.5	1	94.5828	0.210008	24.77	0.821131
6	11.26	125	1111.5	1116.3	1113.9	4.8	3.8	32.6	0.754	20	53.76	8.5	1	94.5828	0.210008	24.77	0.510319
7	11.26	125	1111.5	1116.3	1113.9	4.8	3.8	32.6	0.754	20	53.76	8.5	1	94.5828	0.210008	24.77	0.210008
8	11.26	125	1111.5	1116.3	1113.9	4.8	3.8	32.6	0.754	20	53.76	8.5	1	94.5828	0.210008	24.77	0.348613
9	11.26	125	1111.5	1116.3	1113.9	4.8	3.8	32.6	0.754	20	53.76	8.5	1	94.5828	0.210008	24.77	0.325512
10	11.26	125	1111.5	1116.3	1113.9	4.8	3.8	32.6	0.754	20	53.76	8.5	1	94.5828	0.210008	24.77	0.254109
11	11.26	125	1111.5	1116.3	1113.9	4.8	3.8	32.6	0.754	20	53.76	8.5	1	94.5828	0.210008	24.77	0.159606
1	8.62	125	933	936.7	934.85	2.3	0.3	27.2	0.163	22	187.32	19	1	96.4454	0.0190487	12.74	0.120959
2	8.62	125	933	936.7	934.85	2.3	0.3	27.2	0.163	22	187.32	19	1	96.4454	0.0190487	12.74	0.15639
3	8.62	125	933	936.7	934.85	2.3	0.3	27.2	0.163	22	187.32	19	1	96.4454	0.0190487	12.74	0.101911
4	8.62	125	933	936.7	934.85	2.3	0.3	27.2	0.163	22	187.32	19	1	96.4454	0.0190487	12.74	0.0700993
5	8.62	125	933	936.7	934.85	2.3	0.3	27.2	0.163	22	187.32	19	1	96.4454	0.0190487	12.74	0.0788618
6	8.62	125	933	936.7	934.85	2.3	0.3	27.2	0.163	22	187.32	19	1	96.4454	0.0190487	12.74	0.0628608
7	8.62	125	933	936.7	934.85	2.3	0.3	27.2	0.163	22	187.32	19	1	96.4454	0.0190487	12.74	0.0617179
8	8.62	125	933	936.7	934.85	2.3	0.3	27.2	0.163	22	187.32	19	1	96.4454	0.0190487	12.74	0.0706708
9	8.62	125	933	936.7	934.85	2.3	0.3	27.2	0.163	22	187.32	19	1	96.4454	0.0190487	12.74	0.0424787
10	8.62	125	933	936.7	934.85	2.3	0.3	27.2	0.163	22	187.32	19	1	96.4454	0.0190487	12.74	0.0600035
11	8.62	125	933	936.7	934.85	2.3	0.3	27.2	0.163	22	187.32	19	1	96.4454	0.0190487	12.74	0.0516221
12	8.62	125	933	936.7	934.85	2.3	0.3	27.2	0.163	22	187.32	19	1	96.4454	0.0190487	12.74	0.052003
1	8.62	125	954	956.2	955.1	2.2	1.9	30.8	0.524	19	108.64	18	1	96.4454	0.387831	24.93	2.46272
2	8.62	125	954	956.2	955.1	2.2	1.9	30.8	0.524	19	108.64	18	1	96.4454	0.387831	24.93	3.18409
3	8.62	125	954	956.2	955.1	2.2	1.9	30.8	0.524	19	108.64	18	1	96.4454	0.387831	24.93	2.07489
4	8.62	125	954	956.2	955.1	2.2	1.9	30.8	0.524	19	108.64	18	1	96.4454	0.387831	24.93	1.42722
5	8.62	125	954	956.2	955.1	2.2	1.9	30.8	0.524	19	108.64	18	1	96.4454	0.387831	24.93	1.60562
6	8.62	125	954	956.2	955.1	2.2	1.9	30.8	0.524	19	108.64	18	1	96.4454	0.387831	24.93	1.27984
7	8.62	125	954	956.2	955.1	2.2	1.9	30.8	0.524	19	108.64	18	1	96.4454	0.387831	24.93	1.25657
8	8.62	125	954	956.2	955.1	2.2	1.9	30.8	0.524	19	108.64	18	1	96.4454	0.387831	24.93	1.43885
9	8.62	125	954	956.2	955.1	2.2	1.9	30.8	0.524	19	108.64	18	1	96.4454	0.387831	24.93	0.864862
10	8.62	125	954	956.2	955.1	2.2	1.9	30.8	0.524	19	108.64	18	1	96.4454	0.387831	24.93	1.22167
11	8.62	125	954	956.2	955.1	2.2	1.9	30.8	0.524	19	108.64	18	1	96.4454	0.387831	24.93	1.05102
12	8.62	125	954	956.2	955.1	2.2	1.9	30.8	0.524	19	108.64	18	1	96.4454	0.387831	24.93	1.05878
1	8.62	125	960.9	965.4	963.15	4.5	2.7	30.2	0.548	17	108.92	18	1	96.4454	0.57637	24.93	3.65995
2	8.62	125	960.9	965.4	963.15	4.5	2.7	30.2	0.548	17	108.92	18	1	96.4454	0.57637	24.93	4.732
3	8.62	125	960.9	965.4	963.15	4.5	2.7	30.2	0.548	17	108.92	18	1	96.4454	0.57637	24.93	3.08358
4	8.62	125	960.9	965.4	963.15	4.5	2.7	30.2	0.548	17	108.92	18	1	96.4454	0.57637	24.93	2.12104
5	8.62	125	960.9	965.4	963.15	4.5	2.7	30.2	0.548	17	108.92	18	1	96.4454	0.57637	24.93	2.38617
6	8.62	125	960.9	965.4	963.15	4.5	2.7	30.2	0.548	17	108.92	18	1	96.4454	0.57637	24.93	1.90202
7	8.62	125	960.9	965.4	963.15	4.5	2.7	30.2	0.548	17	108.92	18	1	96.4454	0.57637	24.93	1.86744
8	8.62	125	960.9	965.4	963.15	4.5	2.7	30.2	0.548	17	108.92	18	1	96.4454	0.57637	24.93	2.13833
9	8.62	125	960.9	965.4	963.15	4.5	2.7	30.2	0.548	17	108.92	18	1	96.4454	0.57637	24.93	1.28531
10	8.62	125	960.9	965.4	963.15	4.5	2.7	30.2	0.548	17	108.92	18	1	96.4454	0.57637	24.93	1.81557
11	8.62	125	960.9	965.4	963.15	4.5	2.7	30.2	0.548	17	108.92	18	1	96.4454	0.57637	24.93	1.56196
12	8.62	125	960.9	965.4	963.15	4.5	2.7	30.2	0.548	17	108.92	18	1	96.4454	0.57637	24.93	1.57349
1	8.62	125	967.8	969.9	968.85	1.1	0.2	25.7	0.077	19	108.92	18	1	96.4454	0.00599899	24.93	0.0380936
2	8.62	125	967.8	969.9	968.85	1.1	0.2	25.7	0.077	19	108.92	18	1	96.4454	0.00599899	24.93	0.0492517
3	8.62	125	967.8	969.9	968.85	1.1	0.2	25.7	0.077	19	108.92	18	1	96.4454	0.00599899	24.93	0.0320946
4	8.62	125	967.8	969.9	968.85	1.1	0.2	25.7	0.077	19	108.92	18	1	96.4454	0.00599899	24.93	0.0220763
5	8.62	125	967.8	969.9	968.85	1.1	0.2	25.7	0.077	19	108.92	18	1	96.4454	0.00599899	24.93	0.0248358
6	8.62	125	967.8	969.9	968.85	1.1	0.2	25.7	0.077	19	108.92	18	1	96.4454	0.00599899	24.93	0.0197967
7	8.62	125	967.8	969.9	968.85	1.1	0.2	25.7	0.077	19	108.92	18	1	96.4454	0.00599899	24.93	0.0194367
8	8.62	125	967.8	969.9	968.85	1.1	0.2	25.7	0.077	19	108.92	18	1	96.4454	0.00599899	24.93	0.0222562
9	8.62	125	967.8	969.9	968.85	1.1	0.2	25.7	0.077	19	108.92	18	1	96.4454	0.00599899	24.93	0.0133777
10	8.62	125	967.8	969.9	968.85	1.1	0.2	25.7	0.077	19	108.92	18	1	96.4454	0.00599899	24.93	0.0188968
11	8.62	125	967.8	969.9	968.85	1.1	0.2	25.7	0.077	19	108.92	18	1	96.4454	0.00599899	24.93	0.0162573
12	8.62	125	967.8	969.9	968.85	1.1	0.2	25.7	0.077	19	108.92	18	1	96.4454	0.00599899	24.93	0.0163772
1	8.62	125	972.9	974.7	973.8	1.8	0.3	26.1	0.092	20	115.08	19	1	96.4454	0.0107514	24.8	0.0682716
2	8.62	125	972.9	974.7	973.8	1.8	0.3	26.1	0.092	20	115.08	19	1	96.4454	0.0107514	24.8	0.0882693
3	8.62	125	972.9	974.7	973.8	1.8	0.3	26.1	0.092	20	115.08	19	1	96.4454	0.0107514	24.8	0.0575202
4	8.62	125	972.9	974.7	973.8	1.8	0.3	26.1	0.092	20	115.08	19	1	96.4454	0.0107514	24.8	0.0395653
5	8.62	125	972.9	974.7	973.8	1.8	0.3	26.1	0.092	20	115.08	19	1	96.4454	0.0107514	24.8	0.0445109
6	8.62	125	972.9	974.7	973.8	1.8	0.3	26.1	0.092	20	115.08	19	1	96.4454	0.0107514	24.8	0.0354797
7	8.62	125	972.9	974.7	973.8	1.8	0.3	26.1	0.092	20	115.08	19	1	96.4454	0.0107514	24.8	0.0348346
8	8.62	125	972.9	974.7	973.8	1.8	0.3	26.1	0.092	20	115.08	19	1	96.4454	0.0107514	24.8	0.0398878
9	8.62	125	972.9	974.7	973.8	1.8	0.3	26.1	0.092	20	115.08	19	1	96.4454	0.0107514	24.8	0.0239757
10	8.62	125	972.9	974.7	973.8	1.8	0.3	26.1	0.092	20	115.08	19	1	96.4454	0.0107514	24.8	0.033867
11	8.62	125	972.9	974.7	973.8	1.8	0.3	26.1	0.092	20	115.08	19	1	96.4454	0.0107514	24.8	0.0291364
12	8.62	125	972.9	974.7	973.8	1.8	0.3	26.1	0.092	20	115.08	19	1	96.4454	0.0107514	24.8	0.0293514
1	10.23	125	1095.8	1098.6	1097.2	2.8	0.3	27.3	0.087	31	91.28	15	1	0	0.00519703	25.07	0.0217236
2	10.23	125	1095.8	1098.6	1097.2	2.8	0.3	27.3	0.087	31	91.28	15	1	0	0.00519703	25.07	0.0167864
3	10.23	125	1095.8	1098.6	1097.2	2.8	0.3	27.3	0.087	31	91.28	15	1	0	0.00519703	25.07	0.0141359
4	10.23	125	1095.8	1098.6	1097.2	2.8	0.3	27.3	0.087	31	91.28	15	1	0	0.00519703	25.07	0.0119012
5	10.23	125	1095.8	1098.6	1097.2	2.8	0.3	27.3	0.087	31	91.28	15	1	0	0.00519703	25.07	0.0100303
6	10.23	125	1095.8	1098.6	1097.2	2.8	0.3	27.3	0.087	31	91.28	15	1	0	0.00519703	25.07	0.0125768
7	10.23	125	1095.8	1098.6	1097.2	2.8	0.3	27.3	0.087	31	91.28	15	1	0	0.00519703	25.07	0.00810737
8	10.23	125	1095.8	1098.6	1097.2	2.8	0.3	27.3	0.087	31	91.28	15	1	0	0.00519703	25.07	0.00815934
9	10.23	125	1095.8	1098.6	1097.2	2.8	0.3	27.3	0.087	31	91.28	15	1	0	0.00519703	25.07	0.00758766
10	10.23	125	1095.8	1098.6	1097.2	2.8	0.3	27.3	0.087	31	91.28	15	1	0	0.00519703	25.07	0.00904283
11	10.23	125	1095.8	1098.6	1097.2	2.8	0.3	27.3	0.087	31	91.28	15	1	0	0.00519703	25.07	0.00519703
12	10.23	125	1095.8	1098.6	1097.2	2.8	0.3	27.3	0.087	31	91.28	15	1	0	0.00519703	25.07	0.00815934
1	10.23	125	1129.2	1130.3	1129.75	1.1	0.5	28.1	0.264	32	91	15	1	0	0.0262838	25.3	0.109866
2	10.23	125	1129.2	1130.3	1129.75	1.1	0.5	28.1	0.264	32	91	15	1	0	0.0262838	25.3	0.0848968
3	10.23	125	1129.2	1130.3	1129.75	1.1	0.5	28.1	0.264	32	91	15	1	0	0.0262838	25.3	0.071492
4	10.23	125	1129.2	1130.3	1129.75	1.1	0.5	28.1	0.264	32	91	15	1	0	0.0262838	25.3	0.06019
5	10.23	125	1129.2	1130.3	1129.75	1.1	0.5	28.1	0.264	32	91	15	1	0	0.0262838	25.3	0.0507278
6	10.23	125	1129.2	1130.3	1129.75	1.1	0.5	28.1	0.264	32	91	15	1	0	0.0262838	25.3	0.0636069
7	10.23	125	1129.2	1130.3	1129.75	1.1	0.5	28.1	0.264	32	91	15	1	0	0.0262838	25.3	0.0410028
8	10.23	125	1129.2	1130.3	1129.75	1.1	0.5	28.1	0.264	32	91	15	1	0	0.0262838	25.3	0.0412656
9	10.23	125	1129.2	1130.3	1129.75	1.1	0.5	28.1	0.264	32	91	15	1	0	0.0262838	25.3	0.0383744
10	10.23	125	1129.2	1130.3	1129.75	1.1	0.5	28.1	0.264	32	91	15	1	0	0.0262838	25.3	0.0457339
11	10.23	125	1129.2	1130.3	1129.75	1.1	0.5	28.1	0.264	32	91	15	1	0	0.0262838	25.3	0.0262838
12	10.23	125	1129.2	1130.3	1129.75	1.1	0.5	28.1	0.264	32	91	15	1	0	0.0262838	25.3	0.0412656
1	9.73	175	989.2	991.8	990.5	2.6	1.7	30.4	0.857	22	169.96	28.5	1	92.4881	0.423357	25.02	1.2489
2	9.73	175	989.2	991.8	990.5	2.6	1.7	30.4	0.857	22	169.96	28.5	1	92.4881	0.423357	25.02	0.766277
3	9.73	175	989.2	991.8	990.5	2.6	1.7	30.4	0.857	22	169.96	28.5	1	92.4881	0.423357	25.02	0.139708
4	9.73	175	989.2	991.8	990.5	2.6	1.7	30.4	0.857	22	169.96	28.5	1	92.4881	0.423357	25.02	0.0508029
5	9.73	175	989.2	991.8	990.5	2.6	1.7	30.4	0.857	22	169.96	28.5	1	92.4881	0.423357	25.02	0.029635
1	7.37	175	884.9	891.1	888	3	1.8	30.2	0.63	24	90.44	15	1	90.9623	0.175542	25.07	0.742542
2	7.37	175	884.9	891.1	888	3	1.8	30.2	0.63	24	90.44	15	1	90.9623	0.175542	25.07	0.696901
3	7.37	175	884.9	891.1	888	3	1.8	30.2	0.63	24	90.44	15	1	90.9623	0.175542	25.07	1.17262
4	7.37	175	884.9	891.1	888	3	1.8	30.2	0.63	24	90.44	15	1	90.9623	0.175542	25.07	0.617907
5	7.37	175	884.9	891.1	888	3	1.8	30.2	0.63	24	90.44	15	1	90.9623	0.175542	25.07	0.345817
6	7.37	175	884.9	891.1	888	3	1.8	30.2	0.63	24	90.44	15	1	90.9623	0.175542	25.07	0.258046
7	7.37	175	884.9	891.1	888	3	1.8	30.2	0.63	24	90.44	15	1	90.9623	0.175542	25.07	0.472207
8	7.37	175	884.9	891.1	888	3	1.8	30.2	0.63	24	90.44	15	1	90.9623	0.175542	25.07	0.122879
9	7.37	175	884.9	891.1	888	3	1.8	30.2	0.63	24	90.44	15	1	90.9623	0.175542	25.07	0.282622
1	7.37	175	909.8	912.6	911.2	2.8	2.7	29.2	0.29	23	70.28	11.5	1	90.9623	0.121207	25.09	0.512707
2	7.37	175	909.8	912.6	911.2	2.8	2.7	29.2	0.29	23	70.28	11.5	1	90.9623	0.121207	25.09	0.481193
3	7.37	175	909.8	912.6	911.2	2.8	2.7	29.2	0.29	23	70.28	11.5	1	90.9623	0.121207	25.09	0.809666
4	7.37	175	909.8	912.6	911.2	2.8	2.7	29.2	0.29	23	70.28	11.5	1	90.9623	0.121207	25.09	0.42665
5	7.37	175	909.8	912.6	911.2	2.8	2.7	29.2	0.29	23	70.28	11.5	1	90.9623	0.121207	25.09	0.238779
6	7.37	175	909.8	912.6	911.2	2.8	2.7	29.2	0.29	23	70.28	11.5	1	90.9623	0.121207	25.09	0.178175
7	7.37	175	909.8	912.6	911.2	2.8	2.7	29.2	0.29	23	70.28	11.5	1	90.9623	0.121207	25.09	0.326048
8	7.37	175	909.8	912.6	911.2	2.8	2.7	29.2	0.29	23	70.28	11.5	1	90.9623	0.121207	25.09	0.0848452
9	7.37	175	909.8	912.6	911.2	2.8	2.7	29.2	0.29	23	70.28	11.5	1	90.9623	0.121207	25.09	0.195144
1	7.37	175	919.5	924.9	922.2	2.1	1.1	29.6	0.09	20	141.12	23.5	1	90.9623	0.0153251	24.88	0.0648251
2	7.37	175	919.5	924.9	922.2	2.1	1.1	29.6	0.09	20	141.12	23.5	1	90.9623	0.0153251	24.88	0.0608406
3	7.37	175	919.5	924.9	922.2	2.1	1.1	29.6	0.09	20	141.12	23.5	1	90.9623	0.0153251	24.88	0.102372
4	7.37	175	919.5	924.9	922.2	2.1	1.1	29.6	0.09	20	141.12	23.5	1	90.9623	0.0153251	24.88	0.0539443
5	7.37	175	919.5	924.9	922.2	2.1	1.1	29.6	0.09	20	141.12	23.5	1	90.9623	0.0153251	24.88	0.0301904
6	7.37	175	919.5	924.9	922.2	2.1	1.1	29.6	0.09	20	141.12	23.5	1	90.9623	0.0153251	24.88	0.0225279
7	7.37	175	919.5	924.9	922.2	2.1	1.1	29.6	0.09	20	141.12	23.5	1	90.9623	0.0153251	24.88	0.0412245
8	7.37	175	919.5	924.9	922.2	2.1	1.1	29.6	0.09	20	141.12	23.5	1	90.9623	0.0153251	24.88	0.0107276
9	7.37	175	919.5	924.9	922.2	2.1	1.1	29.6	0.09	20	141.12	23.5	1	90.9623	0.0153251	24.88	0.0246734
1	11.93	125	1067.6	1069.1	1068.35	1.5	1.2	27.8	0.203	24	114.8	19	1	96.4358	0.0489648	24.99	0.0744265
2	11.93	125	1067.6	1069.1	1068.35	1.5	1.2	27.8	0.203	24	114.8	19	1	96.4358	0.0489648	24.99	0.0754058
3	11.93	125	1067.6	1069.1	1068.35	1.5	1.2	27.8	0.203	24	114.8	19	1	96.4358	0.0489648	24.99	0.0332961
4	11.93	125	1067.6	1069.1	1068.35	1.5	1.2	27.8	0.203	24	114.8	19	1	96.4358	0.0489648	24.99	0.0117516
5	11.93	125	1067.6	1069.1	1068.35	1.5	1.2	27.8	0.203	24	114.8	19	1	96.4358	0.0489648	24.99	0.0235031
1	11.93	125	1070.8	1072.6	1071.7	1.8	0.5	28.6	0.243	24	114.8	19	1	96.4358	0.0244221	24.99	0.0371216
2	11.93	125	1070.8	1072.6	1071.7	1.8	0.5	28.6	0.243	24	114.8	19	1	96.4358	0.0244221	24.99	0.0376101
3	11.93	125	1070.8	1072.6	1071.7	1.8	0.5	28.6	0.243	24	114.8	19	1	96.4358	0.0244221	24.99	0.016607
4	11.93	125	1070.8	1072.6	1071.7	1.8	0.5	28.6	0.243	24	114.8	19	1	96.4358	0.0244221	24.99	0.00586131
5	11.93	125	1070.8	1072.6	1071.7	1.8	0.5	28.6	0.243	24	114.8	19	1	96.4358	0.0244221	24.99	0.0117226
1	8.83	175	921.4	924	922.7	2.6	2.5	30.1	0.87	46	70.56	11.5	1	87.976	0.58452	24.93	0.900161
2	8.83	175	921.4	924	922.7	2.6	2.5	30.1	0.87	46	70.56	11.5	1	87.976	0.58452	24.93	0.216273
3	8.83	175	921.4	924	922.7	2.6	2.5	30.1	0.87	46	70.56	11.5	1	87.976	0.58452	24.93	4.95673
4	8.83	175	921.4	924	922.7	2.6	2.5	30.1	0.87	46	70.56	11.5	1	87.976	0.58452	24.93	5.01518
5	8.83	175	921.4	924	922.7	2.6	2.5	30.1	0.87	46	70.56	11.5	1	87.976	0.58452	24.93	6.40634
6	8.83	175	921.4	924	922.7	2.6	2.5	30.1	0.87	46	70.56	11.5	1	87.976	0.58452	24.93	3.63572
7	8.83	175	921.4	924	922.7	2.6	2.5	30.1	0.87	46	70.56	11.5	1	87.976	0.58452	24.93	4.57679
8	8.83	175	921.4	924	922.7	2.6	2.5	30.1	0.87	46	70.56	11.5	1	87.976	0.58452	24.93	4.22608
9	8.83	175	921.4	924	922.7	2.6	2.5	30.1	0.87	46	70.56	11.5	1	87.976	0.58452	24.93	3.31423
10	8.83	175	921.4	924	922.7	2.6	2.5	30.1	0.87	46	70.56	11.5	1	87.976	0.58452	24.93	5.58217
11	8.83	175	921.4	924	922.7	2.6	2.5	30.1	0.87	46	70.56	11.5	1	87.976	0.58452	24.93	4.72877
12	8.83	175	921.4	924	922.7	2.6	2.5	30.1	0.87	46	70.56	11.5	1	87.976	0.58452	24.93	3.26162
1	10.59	125	1103.5	1112.6	1108.05	9.1	7.3	31.7	0.858	29	62.76	10	1	85.4723	0.903106	25.13	1.62559
2	10.59	125	1103.5	1112.6	1108.05	9.1	7.3	31.7	0.858	29	62.76	10	1	85.4723	0.903106	25.13	2.61901
3	10.59	125	1103.5	1112.6	1108.05	9.1	7.3	31.7	0.858	29	62.76	10	1	85.4723	0.903106	25.13	2.79963
4	10.59	125	1103.5	1112.6	1108.05	9.1	7.3	31.7	0.858	29	62.76	10	1	85.4723	0.903106	25.13	2.33001
5	10.59	125	1103.5	1112.6	1108.05	9.1	7.3	31.7	0.858	29	62.76	10	1	85.4723	0.903106	25.13	1.15598
6	10.59	125	1103.5	1112.6	1108.05	9.1	7.3	31.7	0.858	29	62.76	10	1	85.4723	0.903106	25.13	0.614112
7	10.59	125	1103.5	1112.6	1108.05	9.1	7.3	31.7	0.858	29	62.76	10	1	85.4723	0.903106	25.13	0.370273
8	10.59	125	1103.5	1112.6	1108.05	9.1	7.3	31.7	0.858	29	62.76	10	1	85.4723	0.903106	25.13	0.496708
9	10.59	125	1103.5	1112.6	1108.05	9.1	7.3	31.7	0.858	29	62.76	10	1	85.4723	0.903106	25.13	0.505739
10	10.59	125	1103.5	1112.6	1108.05	9.1	7.3	31.7	0.858	29	62.76	10	1	85.4723	0.903106	25.13	0.17159
11	10.59	125	1103.5	1112.6	1108.05	9.1	7.3	31.7	0.858	29	62.76	10	1	85.4723	0.903106	25.13	0.0993416
1	9.49	125	1087.9	1089.5	1088.7	1.6	0.2	28.7	0.295	23	91.28	15	1	87.4702	0.0170767	25.07	0.093068
2	9.49	125	1087.9	1089.5	1088.7	1.6	0.2	28.7	0.295	23	91.28	15	1	87.4702	0.0170767	25.07	0.0983618
3	9.49	125	1087.9	1089.5	1088.7	1.6	0.2	28.7	0.295	23	91.28	15	1	87.4702	0.0170767	25.07	0.0812851
4	9.49	125	1087.9	1089.5	1088.7	1.6	0.2	28.7	0.295	23	91.28	15	1	87.4702	0.0170767	25.07	0.0905065
5	9.49	125	1087.9	1089.5	1088.7	1.6	0.2	28.7	0.295	23	91.28	15	1	87.4702	0.0170767	25.07	0.0520839
6	9.49	125	1087.9	1089.5	1088.7	1.6	0.2	28.7	0.295	23	91.28	15	1	87.4702	0.0170767	25.07	0.0344949
7	9.49	125	1087.9	1089.5	1088.7	1.6	0.2	28.7	0.295	23	91.28	15	1	87.4702	0.0170767	25.07	0.0309088
8	9.49	125	1087.9	1089.5	1088.7	1.6	0.2	28.7	0.295	23	91.28	15	1	87.4702	0.0170767	25.07	0.0245904
9	9.49	125	1087.9	1089.5	1088.7	1.6	0.2	28.7	0.295	23	91.28	15	1	87.4702	0.0170767	25.07	0.00785528
10	9.49	125	1087.9	1089.5	1088.7	1.6	0.2	28.7	0.295	23	91.28	15	1	87.4702	0.0170767	25.07	0.012466
11	9.49	125	1087.9	1089.5	1088.7	1.6	0.2	28.7	0.295	23	91.28	15	1	87.4702	0.0170767	25.07	0.00443994
1	9.65	175	964.5	968.6	966.55	4.1	3.3	29.6	0.989	22	119.96	19	1	96.4833	0.389496	24.87	1.56188
2	9.65	175	964.5	968.6	966.55	4.1	3.3	29.6	0.989	22	119.96	19	1	96.4833	0.389496	24.87	1.21912
3	9.65	175	964.5	968.6	966.55	4.1	3.3	29.6	0.989	22	119.96	19	1	96.4833	0.389496	24.87	0.90363
4	9.65	175	964.5	968.6	966.55	4.1	3.3	29.6	0.989	22	119.96	19	1	96.4833	0.389496	24.87	0.346651
5	9.65	175	964.5	968.6	966.55	4.1	3.3	29.6	0.989	22	119.96	19	1	96.4833	0.389496	24.87	0.307701
6	9.65	175	964.5	968.6	966.55	4.1	3.3	29.6	0.989	22	119.96	19	1	96.4833	0.389496	24.87	0.120744
7	9.65	175	964.5	968.6	966.55	4.1	3.3	29.6	0.989	22	119.96	19	1	96.4833	0.389496	24.87	0.128534
1	9.55	125	994.7	999	996.85	1.3	0.3	25.5	0.102	28	97.56	15	1	94.8867	0.0133706	24.9	0.0200559
2	9.55	125	994.7	999	996.85	1.3	0.3	25.5	0.102	28	97.56	15	1	94.8867	0.0133706	24.9	0.106831
3	9.55	125	994.7	999	996.85	1.3	0.3	25.5	0.102	28	97.56	15	1	94.8867	0.0133706	24.9	0.169673
4	9.55	125	994.7	999	996.85	1.3	0.3	25.5	0.102	28	97.56	15	1	94.8867	0.0133706	24.9	0.135979
5	9.55	125	994.7	999	996.85	1.3	0.3	25.5	0.102	28	97.56	15	1	94.8867	0.0133706	24.9	0.100814
6	9.55	125	994.7	999	996.85	1.3	0.3	25.5	0.102	28	97.56	15	1	94.8867	0.0133706	24.9	0.107232
7	9.55	125	994.7	999	996.85	1.3	0.3	25.5	0.102	28	97.56	15	1	94.8867	0.0133706	24.9	0.0375714
8	9.55	125	994.7	999	996.85	1.3	0.3	25.5	0.102	28	97.56	15	1	94.8867	0.0133706	24.9	0.0319558
9	9.55	125	994.7	999	996.85	1.3	0.3	25.5	0.102	28	97.56	15	1	94.8867	0.0133706	24.9	0.0258053
1	9.55	125	1004.8	1007.1	1005.95	2.3	2	30.6	0.652	20	77.16	11.5	1	94.8867	0.569781	24.91	0.854671
2	9.55	125	1004.8	1007.1	1005.95	2.3	2	30.6	0.652	20	77.16	11.5	1	94.8867	0.569781	24.91	4.55255
3	9.55	125	1004.8	1007.1	1005.95	2.3	2	30.6	0.652	20	77.16	11.5	1	94.8867	0.569781	24.91	7.23052
4	9.55	125	1004.8	1007.1	1005.95	2.3	2	30.6	0.652	20	77.16	11.5	1	94.8867	0.569781	24.91	5.79467
5	9.55	125	1004.8	1007.1	1005.95	2.3	2	30.6	0.652	20	77.16	11.5	1	94.8867	0.569781	24.91	4.29615
6	9.55	125	1004.8	1007.1	1005.95	2.3	2	30.6	0.652	20	77.16	11.5	1	94.8867	0.569781	24.91	4.56964
7	9.55	125	1004.8	1007.1	1005.95	2.3	2	30.6	0.652	20	77.16	11.5	1	94.8867	0.569781	24.91	1.60108
8	9.55	125	1004.8	1007.1	1005.95	2.3	2	30.6	0.652	20	77.16	11.5	1	94.8867	0.569781	24.91	1.36178
9	9.55	125	1004.8	1007.1	1005.95	2.3	2	30.6	0.652	20	77.16	11.5	1	94.8867	0.569781	24.91	1.09968
1	9.55	125	1011.7	1014.2	1012.95	2.5	2	30.2	0.477	21	97.56	15	1	94.8867	0.416849	24.9	0.625273
2	9.55	125	1011.7	1014.2	1012.95	2.5	2	30.2	0.477	21	97.56	15	1	94.8867	0.416849	24.9	3.33062
3	9.55	125	1011.7	1014.2	1012.95	2.5	2	30.2	0.477	21	97.56	15	1	94.8867	0.416849	24.9	5.28981
4	9.55	125	1011.7	1014.2	1012.95	2.5	2	30.2	0.477	21	97.56	15	1	94.8867	0.416849	24.9	4.23935
5	9.55	125	1011.7	1014.2	1012.95	2.5	2	30.2	0.477	21	97.56	15	1	94.8867	0.416849	24.9	3.14304
6	9.55	125	1011.7	1014.2	1012.95	2.5	2	30.2	0.477	21	97.56	15	1	94.8867	0.416849	24.9	3.34313
7	9.55	125	1011.7	1014.2	1012.95	2.5	2	30.2	0.477	21	97.56	15	1	94.8867	0.416849	24.9	1.17134
8	9.55	125	1011.7	1014.2	1012.95	2.5	2	30.2	0.477	21	97.56	15	1	94.8867	0.416849	24.9	0.996268
9	9.55	125	1011.7	1014.2	1012.95	2.5	2	30.2	0.477	21	97.56	15	1	94.8867	0.416849	24.9	0.804518
1	9.73	175	963.7	968	965.85	4.3	3.1	31.5	0.883	18	70.56	11.5	1	95.5837	0.727928	24.93	6.39121
2	9.73	175	963.7	968	965.85	4.3	3.1	31.5	0.883	18	70.56	11.5	1	95.5837	0.727928	24.93	8.69874
3	9.73	175	963.7	968	965.85	4.3	3.1	31.5	0.883	18	70.56	11.5	1	95.5837	0.727928	24.93	5.80159
4	9.73	175	963.7	968	965.85	4.3	3.1	31.5	0.883	18	70.56	11.5	1	95.5837	0.727928	24.93	3.38486
5	9.73	175	963.7	968	965.85	4.3	3.1	31.5	0.883	18	70.56	11.5	1	95.5837	0.727928	24.93	3.2684
6	9.73	175	963.7	968	965.85	4.3	3.1	31.5	0.883	18	70.56	11.5	1	95.5837	0.727928	24.93	4.01816
7	9.73	175	963.7	968	965.85	4.3	3.1	31.5	0.883	18	70.56	11.5	1	95.5837	0.727928	24.93	3.63964
8	9.73	175	963.7	968	965.85	4.3	3.1	31.5	0.883	18	70.56	11.5	1	95.5837	0.727928	24.93	3.4431
9	9.73	175	963.7	968	965.85	4.3	3.1	31.5	0.883	18	70.56	11.5	1	95.5837	0.727928	24.93	2.4604
10	9.73	175	963.7	968	965.85	4.3	3.1	31.5	0.883	18	70.56	11.5	1	95.5837	0.727928	24.93	2.68605
11	9.73	175	963.7	968	965.85	4.3	3.1	31.5	0.883	18	70.56	11.5	1	95.5837	0.727928	24.93	2.99906
1	9.73	175	980.9	983.6	982.25	1.7	1.5	29.6	0.409	19	141.12	23.5	1	95.5837	0.163148	24.96	1.43244
2	9.73	175	980.9	983.6	982.25	1.7	1.5	29.6	0.409	19	141.12	23.5	1	95.5837	0.163148	24.96	1.94961
3	9.73	175	980.9	983.6	982.25	1.7	1.5	29.6	0.409	19	141.12	23.5	1	95.5837	0.163148	24.96	1.30029
4	9.73	175	980.9	983.6	982.25	1.7	1.5	29.6	0.409	19	141.12	23.5	1	95.5837	0.163148	24.96	0.758636
5	9.73	175	980.9	983.6	982.25	1.7	1.5	29.6	0.409	19	141.12	23.5	1	95.5837	0.163148	24.96	0.732532
6	9.73	175	980.9	983.6	982.25	1.7	1.5	29.6	0.409	19	141.12	23.5	1	95.5837	0.163148	24.96	0.900574
7	9.73	175	980.9	983.6	982.25	1.7	1.5	29.6	0.409	19	141.12	23.5	1	95.5837	0.163148	24.96	0.815738
8	9.73	175	980.9	983.6	982.25	1.7	1.5	29.6	0.409	19	141.12	23.5	1	95.5837	0.163148	24.96	0.771688
9	9.73	175	980.9	983.6	982.25	1.7	1.5	29.6	0.409	19	141.12	23.5	1	95.5837	0.163148	24.96	0.551439
10	9.73	175	980.9	983.6	982.25	1.7	1.5	29.6	0.409	19	141.12	23.5	1	95.5837	0.163148	24.96	0.602014
11	9.73	175	980.9	983.6	982.25	1.7	1.5	29.6	0.409	19	141.12	23.5	1	95.5837	0.163148	24.96	0.672168
1	8.01	125	876.9	879	877.95	2.6	1.4	25.7	0.083	22	90.72	15	1	75.2503	0.122033	24.95	0.428336
2	8.01	125	876.9	879	877.95	2.6	1.4	25.7	0.083	22	90.72	15	1	75.2503	0.122033	24.95	0.58698
3	8.01	125	876.9	879	877.95	2.6	1.4	25.7	0.083	22	90.72	15	1	75.2503	0.122033	24.95	0.378303
4	8.01	125	876.9	879	877.95	2.6	1.4	25.7	0.083	22	90.72	15	1	75.2503	0.122033	24.95	0.281897
5	8.01	125	876.9	879	877.95	2.6	1.4	25.7	0.083	22	90.72	15	1	75.2503	0.122033	24.95	0.242846
1	8.01	125	881.7	883.7	882.7	2	1.6	30.3	0.485	24	90.72	15	1	75.2503	0.814955	24.95	2.86049
2	8.01	125	881.7	883.7	882.7	2	1.6	30.3	0.485	24	90.72	15	1	75.2503	0.814955	24.95	3.91993
3	8.01	125	881.7	883.7	882.7	2	1.6	30.3	0.485	24	90.72	15	1	75.2503	0.814955	24.95	2.52636
4	8.01	125	881.7	883.7	882.7	2	1.6	30.3	0.485	24	90.72	15	1	75.2503	0.814955	24.95	1.88255
5	8.01	125	881.7	883.7	882.7	2	1.6	30.3	0.485	24	90.72	15	1	75.2503	0.814955	24.95	1.62176
1	10.97	125	998.5	1002.8	1000.65	3.8	2.7	30.3	0.712	0	0	0	1	93.2549	0.29936	0	0.670566
2	10.97	125	998.5	1002.8	1000.65	3.8	2.7	30.3	0.712	0	0	0	1	93.2549	0.29936	0	0.22452
3	10.97	125	998.5	1002.8	1000.65	3.8	2.7	30.3	0.712	0	0	0	1	93.2549	0.29936	0	0.0179616
4	10.97	125	998.5	1002.8	1000.65	3.8	2.7	30.3	0.712	0	0	0	1	93.2549	0.29936	0	0.014968
5	10.97	125	998.5	1002.8	1000.65	3.8	2.7	30.3	0.712	0	0	0	1	93.2549	0.29936	0	0.0778336
6	10.97	125	998.5	1002.8	1000.65	3.8	2.7	30.3	0.712	0	0	0	1	93.2549	0.29936	0	0.227514
7	10.97	125	998.5	1002.8	1000.65	3.8	2.7	30.3	0.712	0	0	0	1	93.2549	0.29936	0	0.212546
8	10.97	125	998.5	1002.8	1000.65	3.8	2.7	30.3	0.712	0	0	0	1	93.2549	0.29936	0	0.0029936
1	10.97	125	1016.8	1019.7	1018.25	2.4	0.8	25.7	0.185	26	114.52	19	1	93.2549	0.0230469	24.99	0.051625
2	10.97	125	1016.8	1019.7	1018.25	2.4	0.8	25.7	0.185	26	114.52	19	1	93.2549	0.0230469	24.99	0.0172851
3	10.97	125	1016.8	1019.7	1018.25	2.4	0.8	25.7	0.185	26	114.52	19	1	93.2549	0.0230469	24.99	0.00138281
4	10.97	125	1016.8	1019.7	1018.25	2.4	0.8	25.7	0.185	26	114.52	19	1	93.2549	0.0230469	24.99	0.00115234
5	10.97	125	1016.8	1019.7	1018.25	2.4	0.8	25.7	0.185	26	114.52	19	1	93.2549	0.0230469	24.99	0.00599218
6	10.97	125	1016.8	1019.7	1018.25	2.4	0.8	25.7	0.185	26	114.52	19	1	93.2549	0.0230469	24.99	0.0175156
7	10.97	125	1016.8	1019.7	1018.25	2.4	0.8	25.7	0.185	26	114.52	19	1	93.2549	0.0230469	24.99	0.0163633
8	10.97	125	1016.8	1019.7	1018.25	2.4	0.8	25.7	0.185	26	114.52	19	1	93.2549	0.0230469	24.99	0.000230469
1	10.97	125	1029.4	1032	1030.7	2.6	2.1	30.8	0.729	30	91.28	15	1	93.2549	0.238395	24.95	0.534004
2	10.97	125	1029.4	1032	1030.7	2.6	2.1	30.8	0.729	30	91.28	15	1	93.2549	0.238395	24.95	0.178796
3	10.97	125	1029.4	1032	1030.7	2.6	2.1	30.8	0.729	30	91.28	15	1	93.2549	0.238395	24.95	0.0143037
4	10.97	125	1029.4	1032	1030.7	2.6	2.1	30.8	0.729	30	91.28	15	1	93.2549	0.238395	24.95	0.0119197
5	10.97	125	1029.4	1032	1030.7	2.6	2.1	30.8	0.729	30	91.28	15	1	93.2549	0.238395	24.95	0.0619827
6	10.97	125	1029.4	1032	1030.7	2.6	2.1	30.8	0.729	30	91.28	15	1	93.2549	0.238395	24.95	0.18118
7	10.97	125	1029.4	1032	1030.7	2.6	2.1	30.8	0.729	30	91.28	15	1	93.2549	0.238395	24.95	0.16926
8	10.97	125	1029.4	1032	1030.7	2.6	2.1	30.8	0.729	30	91.28	15	1	93.2549	0.238395	24.95	0.00238395
1	7.95	125	845	847.9	846.45	1.8	0.2	25.6	0.131	20	70.28	11.5	1	91.7235	0.00568083	24.93	0.0182355
2	7.95	125	845	847.9	846.45	1.8	0.2	25.6	0.131	20	70.28	11.5	1	91.7235	0.00568083	24.93	0.014827
3	7.95	125	845	847.9	846.45	1.8	0.2	25.6	0.131	20	70.28	11.5	1	91.7235	0.00568083	24.93	0.0185195
4	7.95	125	845	847.9	846.45	1.8	0.2	25.6	0.131	20	70.28	11.5	1	91.7235	0.00568083	24.93	0.0167016
5	7.95	125	845	847.9	846.45	1.8	0.2	25.6	0.131	20	70.28	11.5	1	91.7235	0.00568083	24.93	0.0185195
6	7.95	125	845	847.9	846.45	1.8	0.2	25.6	0.131	20	70.28	11.5	1	91.7235	0.00568083	24.93	0.0176106
7	7.95	125	845	847.9	846.45	1.8	0.2	25.6	0.131	20	70.28	11.5	1	91.7235	0.00568083	24.93	0.0109072
8	7.95	125	845	847.9	846.45	1.8	0.2	25.6	0.131	20	70.28	11.5	1	91.7235	0.00568083	24.93	0.00920295
9	7.95	125	845	847.9	846.45	1.8	0.2	25.6	0.131	20	70.28	11.5	1	91.7235	0.00568083	24.93	0.00943018
10	7.95	125	845	847.9	846.45	1.8	0.2	25.6	0.131	20	70.28	11.5	1	91.7235	0.00568083	24.93	0.00369254
1	9.66	175	1016.4	1018.6	1017.5	2.2	2	31.5	0.564	26	53.2	8.5	1	0	0.315013	24.97	1.04899
2	9.66	175	1016.4	1018.6	1017.5	2.2	2	31.5	0.564	26	53.2	8.5	1	0	0.315013	24.97	1.17815
3	9.66	175	1016.4	1018.6	1017.5	2.2	2	31.5	0.564	26	53.2	8.5	1	0	0.315013	24.97	1.21595
4	9.66	175	1016.4	1018.6	1017.5	2.2	2	31.5	0.564	26	53.2	8.5	1	0	0.315013	24.97	1.06475
5	9.66	175	1016.4	1018.6	1017.5	2.2	2	31.5	0.564	26	53.2	8.5	1	0	0.315013	24.97	0.863137
6	9.66	175	1016.4	1018.6	1017.5	2.2	2	31.5	0.564	26	53.2	8.5	1	0	0.315013	24.97	1.29471
7	9.66	175	1016.4	1018.6	1017.5	2.2	2	31.5	0.564	26	53.2	8.5	1	0	0.315013	24.97	1.55617
8	9.66	175	1016.4	1018.6	1017.5	2.2	2	31.5	0.564	26	53.2	8.5	1	0	0.315013	24.97	1.46481
9	9.66	175	1016.4	1018.6	1017.5	2.2	2	31.5	0.564	26	53.2	8.5	1	0	0.315013	24.97	1.17815
10	9.66	175	1016.4	1018.6	1017.5	2.2	2	31.5	0.564	26	53.2	8.5	1	0	0.315013	24.97	1.2128
11	9.66	175	1016.4	1018.6	1017.5	2.2	2	31.5	0.564	26	53.2	8.5	1	0	0.315013	24.97	1.2632
12	9.66	175	1016.4	1018.6	1017.5	2.2	2	31.5	0.564	26	53.2	8.5	1	0	0.315013	24.97	1.46166
1	9.66	175	1041.6	1044.7	1043.15	2.7	0.9	29.4	0.537	0	0	0	1	0	0.13497	0	0.44945
2	9.66	175	1041.6	1044.7	1043.15	2.7	0.9	29.4	0.537	0	0	0	1	0	0.13497	0	0.504787
3	9.66	175	1041.6	1044.7	1043.15	2.7	0.9	29.4	0.537	0	0	0	1	0	0.13497	0	0.520984
4	9.66	175	1041.6	1044.7	1043.15	2.7	0.9	29.4	0.537	0	0	0	1	0	0.13497	0	0.456198
5	9.66	175	1041.6	1044.7	1043.15	2.7	0.9	29.4	0.537	0	0	0	1	0	0.13497	0	0.369817
6	9.66	175	1041.6	1044.7	1043.15	2.7	0.9	29.4	0.537	0	0	0	1	0	0.13497	0	0.554726
7	9.66	175	1041.6	1044.7	1043.15	2.7	0.9	29.4	0.537	0	0	0	1	0	0.13497	0	0.666751
8	9.66	175	1041.6	1044.7	1043.15	2.7	0.9	29.4	0.537	0	0	0	1	0	0.13497	0	0.62761
9	9.66	175	1041.6	1044.7	1043.15	2.7	0.9	29.4	0.537	0	0	0	1	0	0.13497	0	0.504787
10	9.66	175	1041.6	1044.7	1043.15	2.7	0.9	29.4	0.537	0	0	0	1	0	0.13497	0	0.519634
11	9.66	175	1041.6	1044.7	1043.15	2.7	0.9	29.4	0.537	0	0	0	1	0	0.13497	0	0.541229
12	9.66	175	1041.6	1044.7	1043.15	2.7	0.9	29.4	0.537	0	0	0	1	0	0.13497	0	0.62626
1	10.75	125	1067.8	1069.4	1068.6	1.6	1.4	30.5	0.632	27	91	15	1	95.3824	0.325055	25.18	0.23404
2	10.75	125	1067.8	1069.4	1068.6	1.6	1.4	30.5	0.632	27	91	15	1	95.3824	0.325055	25.18	1.94058
3	10.75	125	1067.8	1069.4	1068.6	1.6	1.4	30.5	0.632	27	91	15	1	95.3824	0.325055	25.18	1.25146
4	10.75	125	1067.8	1069.4	1068.6	1.6	1.4	30.5	0.632	27	91	15	1	95.3824	0.325055	25.18	0.64686
5	10.75	125	1067.8	1069.4	1068.6	1.6	1.4	30.5	0.632	27	91	15	1	95.3824	0.325055	25.18	0.47133
6	10.75	125	1067.8	1069.4	1068.6	1.6	1.4	30.5	0.632	27	91	15	1	95.3824	0.325055	25.18	0.432323
7	10.75	125	1067.8	1069.4	1068.6	1.6	1.4	30.5	0.632	27	91	15	1	95.3824	0.325055	25.18	0.468079
8	10.75	125	1067.8	1069.4	1068.6	1.6	1.4	30.5	0.632	27	91	15	1	95.3824	0.325055	25.18	0.393317
9	10.75	125	1067.8	1069.4	1068.6	1.6	1.4	30.5	0.632	27	91	15	1	95.3824	0.325055	25.18	0.276297
10	10.75	125	1067.8	1069.4	1068.6	1.6	1.4	30.5	0.632	27	91	15	1	95.3824	0.325055	25.18	0.188532
11	10.75	125	1067.8	1069.4	1068.6	1.6	1.4	30.5	0.632	27	91	15	1	95.3824	0.325055	25.18	0.35431
12	10.75	125	1067.8	1069.4	1068.6	1.6	1.4	30.5	0.632	27	91	15	1	95.3824	0.325055	25.18	0.305552
1	8.83	175	919.8	921.5	920.65	1.7	0.7	29.4	0.38	25	145.28	23.5	1	87.6557	0.0923611	25.11	0.302021
2	8.83	175	919.8	921.5	920.65	1.7	0.7	29.4	0.38	25	145.28	23.5	1	87.6557	0.0923611	25.11	0.491361
3	8.83	175	919.8	921.5	920.65	1.7	0.7	29.4	0.38	25	145.28	23.5	1	87.6557	0.0923611	25.11	0.596653
4	8.83	175	919.8	921.5	920.65	1.7	0.7	29.4	0.38	25	145.28	23.5	1	87.6557	0.0923611	25.11	0.493208
5	8.83	175	919.8	921.5	920.65	1.7	0.7	29.4	0.38	25	145.28	23.5	1	87.6557	0.0923611	25.11	0.329729
6	8.83	175	919.8	921.5	920.65	1.7	0.7	29.4	0.38	25	145.28	23.5	1	87.6557	0.0923611	25.11	0.145007
7	8.83	175	919.8	921.5	920.65	1.7	0.7	29.4	0.38	25	145.28	23.5	1	87.6557	0.0923611	25.11	0.0701944
8	8.83	175	919.8	921.5	920.65	1.7	0.7	29.4	0.38	25	145.28	23.5	1	87.6557	0.0923611	25.11	0.123764
9	8.01	125	845.3	846	845.65	0.7	0.4	29.7	0.285	21	70	11.5	1	88.3881	0.0205772	25.09	0.119554
1	8.01	125	845.3	846	845.65	0.7	0.4	29.7	0.285	21	70	11.5	1	88.3881	0.0205772	25.09	0.18108
2	8.01	125	845.3	846	845.65	0.7	0.4	29.7	0.285	21	70	11.5	1	88.3881	0.0205772	25.09	0.176759
3	8.01	125	845.3	846	845.65	0.7	0.4	29.7	0.285	21	70	11.5	1	88.3881	0.0205772	25.09	0.138896
4	8.01	125	845.3	846	845.65	0.7	0.4	29.7	0.285	21	70	11.5	1	88.3881	0.0205772	25.09	0.17182
5	8.01	125	845.3	846	845.65	0.7	0.4	29.7	0.285	21	70	11.5	1	88.3881	0.0205772	25.09	0.199188
6	8.01	125	845.3	846	845.65	0.7	0.4	29.7	0.285	21	70	11.5	1	88.3881	0.0205772	25.09	0.223263
7	8.01	125	845.3	846	845.65	0.7	0.4	29.7	0.285	21	70	11.5	1	88.3881	0.0205772	25.09	0.219148
8	8.01	125	845.3	846	845.65	0.7	0.4	29.7	0.285	21	70	11.5	1	88.3881	0.0205772	25.09	0.170174
9	8.01	125	845.3	846	845.65	0.7	0.4	29.7	0.285	21	70	11.5	1	88.3881	0.0205772	25.09	0.118525
10	8.01	125	845.3	846	845.65	0.7	0.4	29.7	0.285	21	70	11.5	1	88.3881	0.0205772	25.09	0.155358
11	8.01	125	845.3	846	845.65	0.7	0.4	29.7	0.285	21	70	11.5	1	88.3881	0.0205772	25.09	0.146716
1	8.01	125	847.7	848.6	848.15	0.9	0.9	31.7	0.485	23	70	11.5	1	88.3881	0.0787892	25.09	0.457765
2	8.01	125	847.7	848.6	848.15	0.9	0.9	31.7	0.485	23	70	11.5	1	88.3881	0.0787892	25.09	0.693345
3	8.01	125	847.7	848.6	848.15	0.9	0.9	31.7	0.485	23	70	11.5	1	88.3881	0.0787892	25.09	0.676799
4	8.01	125	847.7	848.6	848.15	0.9	0.9	31.7	0.485	23	70	11.5	1	88.3881	0.0787892	25.09	0.531827
5	8.01	125	847.7	848.6	848.15	0.9	0.9	31.7	0.485	23	70	11.5	1	88.3881	0.0787892	25.09	0.65789
6	8.01	125	847.7	848.6	848.15	0.9	0.9	31.7	0.485	23	70	11.5	1	88.3881	0.0787892	25.09	0.762679
7	8.01	125	847.7	848.6	848.15	0.9	0.9	31.7	0.485	23	70	11.5	1	88.3881	0.0787892	25.09	0.854863
8	8.01	125	847.7	848.6	848.15	0.9	0.9	31.7	0.485	23	70	11.5	1	88.3881	0.0787892	25.09	0.839105
9	8.01	125	847.7	848.6	848.15	0.9	0.9	31.7	0.485	23	70	11.5	1	88.3881	0.0787892	25.09	0.651587
10	8.01	125	847.7	848.6	848.15	0.9	0.9	31.7	0.485	23	70	11.5	1	88.3881	0.0787892	25.09	0.453826
11	8.01	125	847.7	848.6	848.15	0.9	0.9	31.7	0.485	23	70	11.5	1	88.3881	0.0787892	25.09	0.594858
12	8.01	125	847.7	848.6	848.15	0.9	0.9	31.7	0.485	23	70	11.5	1	88.3881	0.0787892	25.09	0.561767
1	8.01	125	856.2	859.3	857.75	3.1	1.6	31.9	0.673	24	73.08	12	1	88.3881	0.194365	24.98	1.12926
2	8.01	125	856.2	859.3	857.75	3.1	1.6	31.9	0.673	24	73.08	12	1	88.3881	0.194365	24.98	1.71041
3	8.01	125	856.2	859.3	857.75	3.1	1.6	31.9	0.673	24	73.08	12	1	88.3881	0.194365	24.98	1.66959
4	8.01	125	856.2	859.3	857.75	3.1	1.6	31.9	0.673	24	73.08	12	1	88.3881	0.194365	24.98	1.31196
5	8.01	125	856.2	859.3	857.75	3.1	1.6	31.9	0.673	24	73.08	12	1	88.3881	0.194365	24.98	1.62295
6	8.01	125	856.2	859.3	857.75	3.1	1.6	31.9	0.673	24	73.08	12	1	88.3881	0.194365	24.98	1.88145
7	8.01	125	856.2	859.3	857.75	3.1	1.6	31.9	0.673	24	73.08	12	1	88.3881	0.194365	24.98	2.10886
8	8.01	125	856.2	859.3	857.75	3.1	1.6	31.9	0.673	24	73.08	12	1	88.3881	0.194365	24.98	2.06998
9	8.01	125	856.2	859.3	857.75	3.1	1.6	31.9	0.673	24	73.08	12	1	88.3881	0.194365	24.98	1.6074
10	8.01	125	856.2	859.3	857.75	3.1	1.6	31.9	0.673	24	73.08	12	1	88.3881	0.194365	24.98	1.11954
11	8.01	125	856.2	859.3	857.75	3.1	1.6	31.9	0.673	24	73.08	12	1	88.3881	0.194365	24.98	1.46745
12	8.01	125	856.2	859.3	857.75	3.1	1.6	31.9	0.673	24	73.08	12	1	88.3881	0.194365	24.98	1.38582
1	11.93	125	1005.2	1006.1	1005.65	0.9	0.2	26.7	0.116	0	0	0	1	97.4156	0.00655608	0	0.0178325
2	11.93	125	1005.2	1006.1	1005.65	0.9	0.2	26.7	0.116	0	0	0	1	97.4156	0.00655608	0	0.0284534
3	11.93	125	1005.2	1006.1	1005.65	0.9	0.2	26.7	0.116	0	0	0	1	97.4156	0.00655608	0	0.0422212
4	11.93	125	1005.2	1006.1	1005.65	0.9	0.2	26.7	0.116	0	0	0	1	97.4156	0.00655608	0	0.0336327
5	11.93	125	1005.2	1006.1	1005.65	0.9	0.2	26.7	0.116	0	0	0	1	97.4156	0.00655608	0	0.0329771
6	11.93	125	1005.2	1006.1	1005.65	0.9	0.2	26.7	0.116	0	0	0	1	97.4156	0.00655608	0	0.0308791
7	11.93	125	1005.2	1006.1	1005.65	0.9	0.2	26.7	0.116	0	0	0	1	97.4156	0.00655608	0	0.0209139
8	11.93	125	1005.2	1006.1	1005.65	0.9	0.2	26.7	0.116	0	0	0	1	97.4156	0.00655608	0	0.0105553
9	11.93	125	1005.2	1006.1	1005.65	0.9	0.2	26.7	0.116	0	0	0	1	97.4156	0.00655608	0	0.00937519
10	11.93	125	1005.2	1006.1	1005.65	0.9	0.2	26.7	0.116	0	0	0	1	97.4156	0.00655608	0	0.00649052
11	11.93	125	1005.2	1006.1	1005.65	0.9	0.2	26.7	0.116	0	0	0	1	97.4156	0.00655608	0	0.00727725
12	11.93	125	1005.2	1006.1	1005.65	0.9	0.2	26.7	0.116	0	0	0	1	97.4156	0.00655608	0	0.00957188
1	10.42	125	1138.6	1143.8	1141.2	5.2	0.3	26.2	0.062	28	114.8	19	1	94.5148	0.00339676	25.08	0.00264948
2	10.42	125	1138.6	1143.8	1141.2	5.2	0.3	26.2	0.062	28	114.8	19	1	94.5148	0.00339676	25.08	0.00366851
3	10.42	125	1138.6	1143.8	1141.2	5.2	0.3	26.2	0.062	28	114.8	19	1	94.5148	0.00339676	25.08	0.0034647
4	10.42	125	1138.6	1143.8	1141.2	5.2	0.3	26.2	0.062	28	114.8	19	1	94.5148	0.00339676	25.08	0.00258154
5	10.42	125	1138.6	1143.8	1141.2	5.2	0.3	26.2	0.062	28	114.8	19	1	94.5148	0.00339676	25.08	0.00370247
6	10.42	125	1138.6	1143.8	1141.2	5.2	0.3	26.2	0.062	28	114.8	19	1	94.5148	0.00339676	25.08	0.00217393
7	10.42	125	1138.6	1143.8	1141.2	5.2	0.3	26.2	0.062	28	114.8	19	1	94.5148	0.00339676	25.08	0.00489134
8	10.42	125	1138.6	1143.8	1141.2	5.2	0.3	26.2	0.062	28	114.8	19	1	94.5148	0.00339676	25.08	0.00465357
9	10.42	125	1138.6	1143.8	1141.2	5.2	0.3	26.2	0.062	28	114.8	19	1	94.5148	0.00339676	25.08	0.00519705
10	10.42	125	1138.6	1143.8	1141.2	5.2	0.3	26.2	0.062	28	114.8	19	1	94.5148	0.00339676	25.08	0.0113452
11	10.42	125	1138.6	1143.8	1141.2	5.2	0.3	26.2	0.062	28	114.8	19	1	94.5148	0.00339676	25.08	0.00557069
12	10.42	125	1138.6	1143.8	1141.2	5.2	0.3	26.2	0.062	28	114.8	19	1	94.5148	0.00339676	25.08	0.00529895
1	9.66	175	1032.4	1035.2	1033.8	2.8	2.7	31.3	0.899	24	91.28	15	1	0	0.379325	24.95	1.43764
2	9.66	175	1032.4	1035.2	1033.8	2.8	2.7	31.3	0.899	24	91.28	15	1	0	0.379325	24.95	1.41109
3	9.66	175	1032.4	1035.2	1033.8	2.8	2.7	31.3	0.899	24	91.28	15	1	0	0.379325	24.95	2.46182
4	9.66	175	1032.4	1035.2	1033.8	2.8	2.7	31.3	0.899	24	91.28	15	1	0	0.379325	24.95	2.98529
5	9.66	175	1032.4	1035.2	1033.8	2.8	2.7	31.3	0.899	24	91.28	15	1	0	0.379325	24.95	1.75627
6	9.66	175	1032.4	1035.2	1033.8	2.8	2.7	31.3	0.899	24	91.28	15	1	0	0.379325	24.95	2.26457
7	9.66	175	1032.4	1035.2	1033.8	2.8	2.7	31.3	0.899	24	91.28	15	1	0	0.379325	24.95	2.36699
8	9.66	175	1032.4	1035.2	1033.8	2.8	2.7	31.3	0.899	24	91.28	15	1	0	0.379325	24.95	2.45044
9	9.66	175	1032.4	1035.2	1033.8	2.8	2.7	31.3	0.899	24	91.28	15	1	0	0.379325	24.95	2.1356
10	9.66	175	1032.4	1035.2	1033.8	2.8	2.7	31.3	0.899	24	91.28	15	1	0	0.379325	24.95	1.94594
11	9.66	175	1032.4	1035.2	1033.8	2.8	2.7	31.3	0.899	24	91.28	15	1	0	0.379325	24.95	1.56661
12	9.66	175	1032.4	1035.2	1033.8	2.8	2.7	31.3	0.899	24	91.28	15	1	0	0.379325	24.95	1.66524
1	7.95	125	987.7	989.1	988.4	1.4	1.3	29.5	0.466	25	59.04	9.5	1	93.3682	0.113561	25.11	1.62846
2	7.95	125	987.7	989.1	988.4	1.4	1.3	29.5	0.466	25	59.04	9.5	1	93.3682	0.113561	25.11	2.06907
3	7.95	125	987.7	989.1	988.4	1.4	1.3	29.5	0.466	25	59.04	9.5	1	93.3682	0.113561	25.11	1.55805
4	7.95	125	987.7	989.1	988.4	1.4	1.3	29.5	0.466	25	59.04	9.5	1	93.3682	0.113561	25.11	1.37181
5	7.95	125	987.7	989.1	988.4	1.4	1.3	29.5	0.466	25	59.04	9.5	1	93.3682	0.113561	25.11	1.24122
6	7.95	125	987.7	989.1	988.4	1.4	1.3	29.5	0.466	25	59.04	9.5	1	93.3682	0.113561	25.11	1.33888
7	7.95	125	987.7	989.1	988.4	1.4	1.3	29.5	0.466	25	59.04	9.5	1	93.3682	0.113561	25.11	1.35364
8	7.95	125	987.7	989.1	988.4	1.4	1.3	29.5	0.466	25	59.04	9.5	1	93.3682	0.113561	25.11	0.977756
9	7.95	125	987.7	989.1	988.4	1.4	1.3	29.5	0.466	25	59.04	9.5	1	93.3682	0.113561	25.11	0.748364
10	7.95	125	987.7	989.1	988.4	1.4	1.3	29.5	0.466	25	59.04	9.5	1	93.3682	0.113561	25.11	0.60982
11	7.95	125	987.7	989.1	988.4	1.4	1.3	29.5	0.466	25	59.04	9.5	1	93.3682	0.113561	25.11	0.565531
12	7.95	125	987.7	989.1	988.4	1.4	1.3	29.5	0.466	25	59.04	9.5	1	93.3682	0.113561	25.11	0.231663
1	7.95	125	1005.9	1007.5	1006.7	1.6	0.2	26.2	0.12	23	70.8	11.5	1	93.3682	0.00449893	25.04	0.0645147
2	7.95	125	1005.9	1007.5	1006.7	1.6	0.2	26.2	0.12	23	70.8	11.5	1	93.3682	0.00449893	25.04	0.0819705
3	7.95	125	1005.9	1007.5	1006.7	1.6	0.2	26.2	0.12	23	70.8	11.5	1	93.3682	0.00449893	25.04	0.0617253
4	7.95	125	1005.9	1007.5	1006.7	1.6	0.2	26.2	0.12	23	70.8	11.5	1	93.3682	0.00449893	25.04	0.0543471
5	7.95	125	1005.9	1007.5	1006.7	1.6	0.2	26.2	0.12	23	70.8	11.5	1	93.3682	0.00449893	25.04	0.0491733
6	7.95	125	1005.9	1007.5	1006.7	1.6	0.2	26.2	0.12	23	70.8	11.5	1	93.3682	0.00449893	25.04	0.0530424
7	7.95	125	1005.9	1007.5	1006.7	1.6	0.2	26.2	0.12	23	70.8	11.5	1	93.3682	0.00449893	25.04	0.0536273
8	7.95	125	1005.9	1007.5	1006.7	1.6	0.2	26.2	0.12	23	70.8	11.5	1	93.3682	0.00449893	25.04	0.0387358
9	7.95	125	1005.9	1007.5	1006.7	1.6	0.2	26.2	0.12	23	70.8	11.5	1	93.3682	0.00449893	25.04	0.029648
10	7.95	125	1005.9	1007.5	1006.7	1.6	0.2	26.2	0.12	23	70.8	11.5	1	93.3682	0.00449893	25.04	0.0241593
11	7.95	125	1005.9	1007.5	1006.7	1.6	0.2	26.2	0.12	23	70.8	11.5	1	93.3682	0.00449893	25.04	0.0224047
12	7.95	125	1005.9	1007.5	1006.7	1.6	0.2	26.2	0.12	23	70.8	11.5	1	93.3682	0.00449893	25.04	0.00917782
1	7.95	125	989.7	992	990.85	1.9	1.3	28	0.425	0	0	0	1	89.8709	0.153703	0	0.32585
2	7.95	125	989.7	992	990.85	1.9	1.3	28	0.425	0	0	0	1	89.8709	0.153703	0	0.80694
3	7.95	125	989.7	992	990.85	1.9	1.3	28	0.425	0	0	0	1	89.8709	0.153703	0	0.604052
4	7.95	125	989.7	992	990.85	1.9	1.3	28	0.425	0	0	0	1	89.8709	0.153703	0	0.624033
5	7.95	125	989.7	992	990.85	1.9	1.3	28	0.425	0	0	0	1	89.8709	0.153703	0	0.379646
6	7.95	125	989.7	992	990.85	1.9	1.3	28	0.425	0	0	0	1	89.8709	0.153703	0	0.545645
7	7.95	125	989.7	992	990.85	1.9	1.3	28	0.425	0	0	0	1	89.8709	0.153703	0	0.351979
8	7.95	125	989.7	992	990.85	1.9	1.3	28	0.425	0	0	0	1	89.8709	0.153703	0	0.118351
9	7.95	125	989.7	992	990.85	1.9	1.3	28	0.425	0	0	0	1	89.8709	0.153703	0	0.521052
10	7.95	125	989.7	992	990.85	1.9	1.3	28	0.425	0	0	0	1	89.8709	0.153703	0	0.458034
11	7.95	125	989.7	992	990.85	1.9	1.3	28	0.425	0	0	0	1	89.8709	0.153703	0	0.318165
12	7.95	125	989.7	992	990.85	1.9	1.3	28	0.425	0	0	0	1	89.8709	0.153703	0	0.147555
1	7.95	125	992.7	995.9	994.3	3.2	2.6	29.1	0.521	0	0	0	1	89.8709	0.376843	0	0.798907
2	7.95	125	992.7	995.9	994.3	3.2	2.6	29.1	0.521	0	0	0	1	89.8709	0.376843	0	1.97843
3	7.95	125	992.7	995.9	994.3	3.2	2.6	29.1	0.521	0	0	0	1	89.8709	0.376843	0	1.48099
4	7.95	125	992.7	995.9	994.3	3.2	2.6	29.1	0.521	0	0	0	1	89.8709	0.376843	0	1.52998
5	7.95	125	992.7	995.9	994.3	3.2	2.6	29.1	0.521	0	0	0	1	89.8709	0.376843	0	0.930802
6	7.95	125	992.7	995.9	994.3	3.2	2.6	29.1	0.521	0	0	0	1	89.8709	0.376843	0	1.33779
7	7.95	125	992.7	995.9	994.3	3.2	2.6	29.1	0.521	0	0	0	1	89.8709	0.376843	0	0.862971
8	7.95	125	992.7	995.9	994.3	3.2	2.6	29.1	0.521	0	0	0	1	89.8709	0.376843	0	0.290169
9	7.95	125	992.7	995.9	994.3	3.2	2.6	29.1	0.521	0	0	0	1	89.8709	0.376843	0	1.2775
10	7.95	125	992.7	995.9	994.3	3.2	2.6	29.1	0.521	0	0	0	1	89.8709	0.376843	0	1.12299
11	7.95	125	992.7	995.9	994.3	3.2	2.6	29.1	0.521	0	0	0	1	89.8709	0.376843	0	0.780065
12	7.95	125	992.7	995.9	994.3	3.2	2.6	29.1	0.521	0	0	0	1	89.8709	0.376843	0	0.361769
1	7.95	125	885	892.5	888.75	7.5	6	31.1	1.003	23	52.8	8.5	1	94.3526	0.993725	25.06	1.34153
2	7.95	125	885	892.5	888.75	7.5	6	31.1	1.003	23	52.8	8.5	1	94.3526	0.993725	25.06	0.834729
3	7.95	125	885	892.5	888.75	7.5	6	31.1	1.003	23	52.8	8.5	1	94.3526	0.993725	25.06	2.49425
4	7.95	125	885	892.5	888.75	7.5	6	31.1	1.003	23	52.8	8.5	1	94.3526	0.993725	25.06	1.4409
5	7.95	125	885	892.5	888.75	7.5	6	31.1	1.003	23	52.8	8.5	1	94.3526	0.993725	25.06	0.496863
6	7.95	125	885	892.5	888.75	7.5	6	31.1	1.003	23	52.8	8.5	1	94.3526	0.993725	25.06	0.407427
7	7.95	125	885	892.5	888.75	7.5	6	31.1	1.003	23	52.8	8.5	1	94.3526	0.993725	25.06	0.317992
8	7.95	125	885	892.5	888.75	7.5	6	31.1	1.003	23	52.8	8.5	1	94.3526	0.993725	25.06	0.735357
9	7.95	125	885	892.5	888.75	7.5	6	31.1	1.003	23	52.8	8.5	1	94.3526	0.993725	25.06	0.188808
10	7.95	125	885	892.5	888.75	7.5	6	31.1	1.003	23	52.8	8.5	1	94.3526	0.993725	25.06	0.149059
1	7.95	125	843.3	844.9	844.1	1.6	0.8	28.3	0.451	19	82.16	13.5	1	95.6779	0.204419	24.87	0.0163535
2	7.95	125	843.3	844.9	844.1	1.6	0.8	28.3	0.451	19	82.16	13.5	1	95.6779	0.204419	24.87	0.0490606
3	7.95	125	843.3	844.9	844.1	1.6	0.8	28.3	0.451	19	82.16	13.5	1	95.6779	0.204419	24.87	0.0776793
4	7.95	125	843.3	844.9	844.1	1.6	0.8	28.3	0.451	19	82.16	13.5	1	95.6779	0.204419	24.87	0.177845
5	7.95	125	843.3	844.9	844.1	1.6	0.8	28.3	0.451	19	82.16	13.5	1	95.6779	0.204419	24.87	0.273922
6	7.95	125	843.3	844.9	844.1	1.6	0.8	28.3	0.451	19	82.16	13.5	1	95.6779	0.204419	24.87	0.325027
7	7.95	125	843.3	844.9	844.1	1.6	0.8	28.3	0.451	19	82.16	13.5	1	95.6779	0.204419	24.87	0.220773
8	7.95	125	843.3	844.9	844.1	1.6	0.8	28.3	0.451	19	82.16	13.5	1	95.6779	0.204419	24.87	0.218729
9	7.95	125	843.3	844.9	844.1	1.6	0.8	28.3	0.451	19	82.16	13.5	1	95.6779	0.204419	24.87	0.042928
10	7.95	125	843.3	844.9	844.1	1.6	0.8	28.3	0.451	19	82.16	13.5	1	95.6779	0.204419	24.87	0.0490606
11	7.95	125	843.3	844.9	844.1	1.6	0.8	28.3	0.451	19	82.16	13.5	1	95.6779	0.204419	24.87	0.00204419
1	7.95	125	846.8	850.7	848.75	3.5	2.4	30.3	0.501	19	70.32	11.5	1	95.6779	0.681246	25.04	0.0544997
2	7.95	125	846.8	850.7	848.75	3.5	2.4	30.3	0.501	19	70.32	11.5	1	95.6779	0.681246	25.04	0.163499
3	7.95	125	846.8	850.7	848.75	3.5	2.4	30.3	0.501	19	70.32	11.5	1	95.6779	0.681246	25.04	0.258874
4	7.95	125	846.8	850.7	848.75	3.5	2.4	30.3	0.501	19	70.32	11.5	1	95.6779	0.681246	25.04	0.592684
5	7.95	125	846.8	850.7	848.75	3.5	2.4	30.3	0.501	19	70.32	11.5	1	95.6779	0.681246	25.04	0.91287
6	7.95	125	846.8	850.7	848.75	3.5	2.4	30.3	0.501	19	70.32	11.5	1	95.6779	0.681246	25.04	1.08318
7	7.95	125	846.8	850.7	848.75	3.5	2.4	30.3	0.501	19	70.32	11.5	1	95.6779	0.681246	25.04	0.735746
8	7.95	125	846.8	850.7	848.75	3.5	2.4	30.3	0.501	19	70.32	11.5	1	95.6779	0.681246	25.04	0.728934
9	7.95	125	846.8	850.7	848.75	3.5	2.4	30.3	0.501	19	70.32	11.5	1	95.6779	0.681246	25.04	0.143062
10	7.95	125	846.8	850.7	848.75	3.5	2.4	30.3	0.501	19	70.32	11.5	1	95.6779	0.681246	25.04	0.163499
11	7.95	125	846.8	850.7	848.75	3.5	2.4	30.3	0.501	19	70.32	11.5	1	95.6779	0.681246	25.04	0.00681246
1	7.95	125	855.7	856.1	855.9	0.4	0.4	27.7	0.121	21	70.32	11.5	1	95.6779	0.0274221	25.04	0.00219377
2	7.95	125	855.7	856.1	855.9	0.4	0.4	27.7	0.121	21	70.32	11.5	1	95.6779	0.0274221	25.04	0.0065813
3	7.95	125	855.7	856.1	855.9	0.4	0.4	27.7	0.121	21	70.32	11.5	1	95.6779	0.0274221	25.04	0.0104204
4	7.95	125	855.7	856.1	855.9	0.4	0.4	27.7	0.121	21	70.32	11.5	1	95.6779	0.0274221	25.04	0.0238572
5	7.95	125	855.7	856.1	855.9	0.4	0.4	27.7	0.121	21	70.32	11.5	1	95.6779	0.0274221	25.04	0.0367456
6	7.95	125	855.7	856.1	855.9	0.4	0.4	27.7	0.121	21	70.32	11.5	1	95.6779	0.0274221	25.04	0.0436011
7	7.95	125	855.7	856.1	855.9	0.4	0.4	27.7	0.121	21	70.32	11.5	1	95.6779	0.0274221	25.04	0.0296159
8	7.95	125	855.7	856.1	855.9	0.4	0.4	27.7	0.121	21	70.32	11.5	1	95.6779	0.0274221	25.04	0.0293416
9	7.95	125	855.7	856.1	855.9	0.4	0.4	27.7	0.121	21	70.32	11.5	1	95.6779	0.0274221	25.04	0.00575864
10	7.95	125	855.7	856.1	855.9	0.4	0.4	27.7	0.121	21	70.32	11.5	1	95.6779	0.0274221	25.04	0.0065813
11	7.95	125	855.7	856.1	855.9	0.4	0.4	27.7	0.121	21	70.32	11.5	1	95.6779	0.0274221	25.04	0.000274221
1	7.95	125	860.1	864.5	862.3	4.4	3.8	31.4	0.68	0	0	0	1	92.5987	0.579048	0	3.20792
2	7.95	125	860.1	864.5	862.3	4.4	3.8	31.4	0.68	0	0	0	1	92.5987	0.579048	0	2.47832
3	7.95	125	860.1	864.5	862.3	4.4	3.8	31.4	0.68	0	0	0	1	92.5987	0.579048	0	3.1037
4	7.95	125	860.1	864.5	862.3	4.4	3.8	31.4	0.68	0	0	0	1	92.5987	0.579048	0	3.98964
5	7.95	125	860.1	864.5	862.3	4.4	3.8	31.4	0.68	0	0	0	1	92.5987	0.579048	0	4.6208
6	7.95	125	860.1	864.5	862.3	4.4	3.8	31.4	0.68	0	0	0	1	92.5987	0.579048	0	6.06263
7	7.95	125	860.1	864.5	862.3	4.4	3.8	31.4	0.68	0	0	0	1	92.5987	0.579048	0	6.46796
8	7.95	125	860.1	864.5	862.3	4.4	3.8	31.4	0.68	0	0	0	1	92.5987	0.579048	0	4.83505
9	7.95	125	860.1	864.5	862.3	4.4	3.8	31.4	0.68	0	0	0	1	92.5987	0.579048	0	2.35093
10	7.95	125	860.1	864.5	862.3	4.4	3.8	31.4	0.68	0	0	0	1	92.5987	0.579048	0	2.81417
11	7.95	125	860.1	864.5	862.3	4.4	3.8	31.4	0.68	0	0	0	1	92.5987	0.579048	0	2.15406
12	7.95	125	860.1	864.5	862.3	4.4	3.8	31.4	0.68	0	0	0	1	92.5987	0.579048	0	1.87611
1	7.37	175	918.2	922	920.1	3.8	3.5	29	0.13	29	140.56	23.5	1	91.0157	0.0683286	25.03	0.0389473
2	7.37	175	918.2	922	920.1	3.8	3.5	29	0.13	29	140.56	23.5	1	91.0157	0.0683286	25.03	0.062179
3	7.37	175	918.2	922	920.1	3.8	3.5	29	0.13	29	140.56	23.5	1	91.0157	0.0683286	25.03	0.0840442
4	7.37	175	918.2	922	920.1	3.8	3.5	29	0.13	29	140.56	23.5	1	91.0157	0.0683286	25.03	0.133241
5	7.37	175	918.2	922	920.1	3.8	3.5	29	0.13	29	140.56	23.5	1	91.0157	0.0683286	25.03	0.107959
6	7.37	175	918.2	922	920.1	3.8	3.5	29	0.13	29	140.56	23.5	1	91.0157	0.0683286	25.03	0.151689
7	7.37	175	918.2	922	920.1	3.8	3.5	29	0.13	29	140.56	23.5	1	91.0157	0.0683286	25.03	0.104543
8	7.37	175	918.2	922	920.1	3.8	3.5	29	0.13	29	140.56	23.5	1	91.0157	0.0683286	25.03	0.127091
9	7.37	175	918.2	922	920.1	3.8	3.5	29	0.13	29	140.56	23.5	1	91.0157	0.0683286	25.03	0.0867773
10	7.37	175	918.2	922	920.1	3.8	3.5	29	0.13	29	140.56	23.5	1	91.0157	0.0683286	25.03	0.200203
11	7.37	175	918.2	922	920.1	3.8	3.5	29	0.13	29	140.56	23.5	1	91.0157	0.0683286	25.03	0.0970266
12	7.37	175	918.2	922	920.1	3.8	3.5	29	0.13	29	140.56	23.5	1	91.0157	0.0683286	25.03	0.104543
1	8.67	175	878.4	883.5	880.95	5.1	4.7	31.6	0.659	23	75.28	11.5	1	88.4421	0.426584	24.93	1.01527
2	8.67	175	878.4	883.5	880.95	5.1	4.7	31.6	0.659	23	75.28	11.5	1	88.4421	0.426584	24.93	2.35474
3	8.67	175	878.4	883.5	880.95	5.1	4.7	31.6	0.659	23	75.28	11.5	1	88.4421	0.426584	24.93	2.64909
4	8.67	175	878.4	883.5	880.95	5.1	4.7	31.6	0.659	23	75.28	11.5	1	88.4421	0.426584	24.93	2.2481
5	8.67	175	878.4	883.5	880.95	5.1	4.7	31.6	0.659	23	75.28	11.5	1	88.4421	0.426584	24.93	2.48272
6	8.67	175	878.4	883.5	880.95	5.1	4.7	31.6	0.659	23	75.28	11.5	1	88.4421	0.426584	24.93	1.77886
7	8.67	175	878.4	883.5	880.95	5.1	4.7	31.6	0.659	23	75.28	11.5	1	88.4421	0.426584	24.93	1.44612
8	8.67	175	878.4	883.5	880.95	5.1	4.7	31.6	0.659	23	75.28	11.5	1	88.4421	0.426584	24.93	1.44612
9	8.67	175	878.4	883.5	880.95	5.1	4.7	31.6	0.659	23	75.28	11.5	1	88.4421	0.426584	24.93	1.62529
10	8.67	175	878.4	883.5	880.95	5.1	4.7	31.6	0.659	23	75.28	11.5	1	88.4421	0.426584	24.93	0.695332
1	8.67	175	893.3	895.8	894.55	2.5	2.3	30.1	0.646	18	70	11.5	1	88.4421	0.204636	25.09	0.487033
2	8.67	175	893.3	895.8	894.55	2.5	2.3	30.1	0.646	18	70	11.5	1	88.4421	0.204636	25.09	1.12959
3	8.67	175	893.3	895.8	894.55	2.5	2.3	30.1	0.646	18	70	11.5	1	88.4421	0.204636	25.09	1.27079
4	8.67	175	893.3	895.8	894.55	2.5	2.3	30.1	0.646	18	70	11.5	1	88.4421	0.204636	25.09	1.07843
5	8.67	175	893.3	895.8	894.55	2.5	2.3	30.1	0.646	18	70	11.5	1	88.4421	0.204636	25.09	1.19098
6	8.67	175	893.3	895.8	894.55	2.5	2.3	30.1	0.646	18	70	11.5	1	88.4421	0.204636	25.09	0.853332
7	8.67	175	893.3	895.8	894.55	2.5	2.3	30.1	0.646	18	70	11.5	1	88.4421	0.204636	25.09	0.693716
8	8.67	175	893.3	895.8	894.55	2.5	2.3	30.1	0.646	18	70	11.5	1	88.4421	0.204636	25.09	0.693716
9	8.67	175	893.3	895.8	894.55	2.5	2.3	30.1	0.646	18	70	11.5	1	88.4421	0.204636	25.09	0.779663
10	8.67	175	893.3	895.8	894.55	2.5	2.3	30.1	0.646	18	70	11.5	1	88.4421	0.204636	25.09	0.333557
1	8.67	175	897.8	899.5	898.65	1.7	1.5	30.5	0.609	18	114.24	19	1	88.4421	0.125814	24.9	0.299438
2	8.67	175	897.8	899.5	898.65	1.7	1.5	30.5	0.609	18	114.24	19	1	88.4421	0.125814	24.9	0.694495
3	8.67	175	897.8	899.5	898.65	1.7	1.5	30.5	0.609	18	114.24	19	1	88.4421	0.125814	24.9	0.781307
4	8.67	175	897.8	899.5	898.65	1.7	1.5	30.5	0.609	18	114.24	19	1	88.4421	0.125814	24.9	0.663041
5	8.67	175	897.8	899.5	898.65	1.7	1.5	30.5	0.609	18	114.24	19	1	88.4421	0.125814	24.9	0.732239
6	8.67	175	897.8	899.5	898.65	1.7	1.5	30.5	0.609	18	114.24	19	1	88.4421	0.125814	24.9	0.524646
7	8.67	175	897.8	899.5	898.65	1.7	1.5	30.5	0.609	18	114.24	19	1	88.4421	0.125814	24.9	0.426511
8	8.67	175	897.8	899.5	898.65	1.7	1.5	30.5	0.609	18	114.24	19	1	88.4421	0.125814	24.9	0.426511
9	8.67	175	897.8	899.5	898.65	1.7	1.5	30.5	0.609	18	114.24	19	1	88.4421	0.125814	24.9	0.479353
10	8.67	175	897.8	899.5	898.65	1.7	1.5	30.5	0.609	18	114.24	19	1	88.4421	0.125814	24.9	0.205077
1	8.01	125	967.3	968.5	967.9	1.2	0.9	29.3	0.423	19	91	15	1	0	0.0412862	25.07	0.125923
2	8.01	125	967.3	968.5	967.9	1.2	0.9	29.3	0.423	19	91	15	1	0	0.0412862	25.07	0.120143
3	8.01	125	967.3	968.5	967.9	1.2	0.9	29.3	0.423	19	91	15	1	0	0.0412862	25.07	0.0846367
4	8.01	125	967.3	968.5	967.9	1.2	0.9	29.3	0.423	19	91	15	1	0	0.0412862	25.07	0.0726637
5	8.01	125	967.3	968.5	967.9	1.2	0.9	29.3	0.423	19	91	15	1	0	0.0412862	25.07	0.0813338
6	8.01	125	967.3	968.5	967.9	1.2	0.9	29.3	0.423	19	91	15	1	0	0.0412862	25.07	0.104867
7	8.01	125	967.3	968.5	967.9	1.2	0.9	29.3	0.423	19	91	15	1	0	0.0412862	25.07	0.136657
8	8.01	125	967.3	968.5	967.9	1.2	0.9	29.3	0.423	19	91	15	1	0	0.0412862	25.07	0.107757
9	8.01	125	967.3	968.5	967.9	1.2	0.9	29.3	0.423	19	91	15	1	0	0.0412862	25.07	0.149043
10	8.01	125	967.3	968.5	967.9	1.2	0.9	29.3	0.423	19	91	15	1	0	0.0412862	25.07	0.126336
11	8.01	125	967.3	968.5	967.9	1.2	0.9	29.3	0.423	19	91	15	1	0	0.0412862	25.07	0.168448
12	8.01	125	967.3	968.5	967.9	1.2	0.9	29.3	0.423	19	91	15	1	0	0.0412862	25.07	0.231616
1	8.01	125	982.4	984.7	983.55	2.3	2.2	30.6	0.668	19	70.84	11.5	1	0	0.159375	24.93	0.486095
2	8.01	125	982.4	984.7	983.55	2.3	2.2	30.6	0.668	19	70.84	11.5	1	0	0.159375	24.93	0.463782
3	8.01	125	982.4	984.7	983.55	2.3	2.2	30.6	0.668	19	70.84	11.5	1	0	0.159375	24.93	0.326719
4	8.01	125	982.4	984.7	983.55	2.3	2.2	30.6	0.668	19	70.84	11.5	1	0	0.159375	24.93	0.280501
5	8.01	125	982.4	984.7	983.55	2.3	2.2	30.6	0.668	19	70.84	11.5	1	0	0.159375	24.93	0.313969
6	8.01	125	982.4	984.7	983.55	2.3	2.2	30.6	0.668	19	70.84	11.5	1	0	0.159375	24.93	0.404813
7	8.01	125	982.4	984.7	983.55	2.3	2.2	30.6	0.668	19	70.84	11.5	1	0	0.159375	24.93	0.527532
8	8.01	125	982.4	984.7	983.55	2.3	2.2	30.6	0.668	19	70.84	11.5	1	0	0.159375	24.93	0.41597
9	8.01	125	982.4	984.7	983.55	2.3	2.2	30.6	0.668	19	70.84	11.5	1	0	0.159375	24.93	0.575345
10	8.01	125	982.4	984.7	983.55	2.3	2.2	30.6	0.668	19	70.84	11.5	1	0	0.159375	24.93	0.487689
11	8.01	125	982.4	984.7	983.55	2.3	2.2	30.6	0.668	19	70.84	11.5	1	0	0.159375	24.93	0.650251
12	8.01	125	982.4	984.7	983.55	2.3	2.2	30.6	0.668	19	70.84	11.5	1	0	0.159375	24.93	0.894096
1	7.95	125	823	824.6	823.8	1.6	0.6	27.1	0.241	19	52.8	8.5	1	84.9802	0.0772849	25.06	0.485349
2	7.95	125	823	824.6	823.8	1.6	0.6	27.1	0.241	19	52.8	8.5	1	84.9802	0.0772849	25.06	0.275134
3	7.95	125	823	824.6	823.8	1.6	0.6	27.1	0.241	19	52.8	8.5	1	84.9802	0.0772849	25.06	0.365557
4	7.95	125	823	824.6	823.8	1.6	0.6	27.1	0.241	19	52.8	8.5	1	84.9802	0.0772849	25.06	0.391834
5	7.95	125	823	824.6	823.8	1.6	0.6	27.1	0.241	19	52.8	8.5	1	84.9802	0.0772849	25.06	0.370195
6	7.95	125	823	824.6	823.8	1.6	0.6	27.1	0.241	19	52.8	8.5	1	84.9802	0.0772849	25.06	0.450571
7	7.95	125	823	824.6	823.8	1.6	0.6	27.1	0.241	19	52.8	8.5	1	84.9802	0.0772849	25.06	0.48844
8	7.95	125	823	824.6	823.8	1.6	0.6	27.1	0.241	19	52.8	8.5	1	84.9802	0.0772849	25.06	0.623689
9	7.95	125	823	824.6	823.8	1.6	0.6	27.1	0.241	19	52.8	8.5	1	84.9802	0.0772849	25.06	0.510853
10	7.95	125	823	824.6	823.8	1.6	0.6	27.1	0.241	19	52.8	8.5	1	84.9802	0.0772849	25.06	0.848588
11	7.95	125	823	824.6	823.8	1.6	0.6	27.1	0.241	19	52.8	8.5	1	84.9802	0.0772849	25.06	0.758165
12	7.95	125	823	824.6	823.8	1.6	0.6	27.1	0.241	19	52.8	8.5	1	84.9802	0.0772849	25.06	0.641464
1	7.95	125	831.8	835.5	833.65	2.2	0.2	25.7	0.088	21	113.68	19	1	77.8989	0.0114012	25.08	0.0229164
2	7.95	125	831.8	835.5	833.65	2.2	0.2	25.7	0.088	21	113.68	19	1	77.8989	0.0114012	25.08	0.0380799
3	7.95	125	831.8	835.5	833.65	2.2	0.2	25.7	0.088	21	113.68	19	1	77.8989	0.0114012	25.08	0.0518754
4	7.95	125	831.8	835.5	833.65	2.2	0.2	25.7	0.088	21	113.68	19	1	77.8989	0.0114012	25.08	0.0329494
5	7.95	125	831.8	835.5	833.65	2.2	0.2	25.7	0.088	21	113.68	19	1	77.8989	0.0114012	25.08	0.0104891
6	7.95	125	831.8	835.5	833.65	2.2	0.2	25.7	0.088	21	113.68	19	1	77.8989	0.0114012	25.08	0.0380799
7	7.95	125	831.8	835.5	833.65	2.2	0.2	25.7	0.088	21	113.68	19	1	77.8989	0.0114012	25.08	0.0303271
8	7.95	125	831.8	835.5	833.65	2.2	0.2	25.7	0.088	21	113.68	19	1	77.8989	0.0114012	25.08	0.0425264
9	7.95	125	831.8	835.5	833.65	2.2	0.2	25.7	0.088	21	113.68	19	1	77.8989	0.0114012	25.08	0.019154
10	7.95	125	831.8	835.5	833.65	2.2	0.2	25.7	0.088	21	113.68	19	1	77.8989	0.0114012	25.08	0.0186979
1	7.95	125	837.6	838.7	838.15	1.1	0.5	28	0.215	16	113.68	19	1	77.8989	0.0696379	25.08	0.139972
2	7.95	125	837.6	838.7	838.15	1.1	0.5	28	0.215	16	113.68	19	1	77.8989	0.0696379	25.08	0.232591
3	7.95	125	837.6	838.7	838.15	1.1	0.5	28	0.215	16	113.68	19	1	77.8989	0.0696379	25.08	0.316852
4	7.95	125	837.6	838.7	838.15	1.1	0.5	28	0.215	16	113.68	19	1	77.8989	0.0696379	25.08	0.201253
5	7.95	125	837.6	838.7	838.15	1.1	0.5	28	0.215	16	113.68	19	1	77.8989	0.0696379	25.08	0.0640669
6	7.95	125	837.6	838.7	838.15	1.1	0.5	28	0.215	16	113.68	19	1	77.8989	0.0696379	25.08	0.232591
7	7.95	125	837.6	838.7	838.15	1.1	0.5	28	0.215	16	113.68	19	1	77.8989	0.0696379	25.08	0.185237
8	7.95	125	837.6	838.7	838.15	1.1	0.5	28	0.215	16	113.68	19	1	77.8989	0.0696379	25.08	0.259749
9	7.95	125	837.6	838.7	838.15	1.1	0.5	28	0.215	16	113.68	19	1	77.8989	0.0696379	25.08	0.116992
10	7.95	125	837.6	838.7	838.15	1.1	0.5	28	0.215	16	113.68	19	1	77.8989	0.0696379	25.08	0.114206
1	7.95	125	912.4	921.2	916.8	7.6	5.2	30.7	0.571	32	38.4	6	1	94.6953	1	25	7.22
2	7.95	125	912.4	921.2	916.8	7.6	5.2	30.7	0.571	32	38.4	6	1	94.6953	1	25	7.21
3	7.95	125	912.4	921.2	916.8	7.6	5.2	30.7	0.571	32	38.4	6	1	94.6953	1	25	8.23
4	7.95	125	912.4	921.2	916.8	7.6	5.2	30.7	0.571	32	38.4	6	1	94.6953	1	25	7.79
5	7.95	125	912.4	921.2	916.8	7.6	5.2	30.7	0.571	32	38.4	6	1	94.6953	1	25	10.9
6	7.95	125	912.4	921.2	916.8	7.6	5.2	30.7	0.571	32	38.4	6	1	94.6953	1	25	9.87
7	7.95	125	912.4	921.2	916.8	7.6	5.2	30.7	0.571	32	38.4	6	1	94.6953	1	25	6.83
8	7.95	125	912.4	921.2	916.8	7.6	5.2	30.7	0.571	32	38.4	6	1	94.6953	1	25	8.11
9	7.95	125	912.4	921.2	916.8	7.6	5.2	30.7	0.571	32	38.4	6	1	94.6953	1	25	10.1
10	7.95	125	912.4	921.2	916.8	7.6	5.2	30.7	0.571	32	38.4	6	1	94.6953	1	25	10.64
11	7.95	125	912.4	921.2	916.8	7.6	5.2	30.7	0.571	32	38.4	6	1	94.6953	1	25	13.09
12	7.95	125	912.4	921.2	916.8	7.6	5.2	30.7	0.571	32	38.4	6	1	94.6953	1	25	10.26
1	7.95	125	977.5	979.1	978.3	1.6	0.9	30.3	0.532	27	44.4	7	1	90.0101	0.256495	25.07	0.153897
2	7.95	125	977.5	979.1	978.3	1.6	0.9	30.3	0.532	27	44.4	7	1	90.0101	0.256495	25.07	0.382178
3	7.95	125	977.5	979.1	978.3	1.6	0.9	30.3	0.532	27	44.4	7	1	90.0101	0.256495	25.07	0.492471
4	7.95	125	977.5	979.1	978.3	1.6	0.9	30.3	0.532	27	44.4	7	1	90.0101	0.256495	25.07	0.130813
1	7.95	125	986.3	989.2	987.75	2.9	2.2	29.2	0.509	21	32.64	5	1	90.0101	0.599882	25.2	0.359929
2	7.95	125	986.3	989.2	987.75	2.9	2.2	29.2	0.509	21	32.64	5	1	90.0101	0.599882	25.2	0.893824
3	7.95	125	986.3	989.2	987.75	2.9	2.2	29.2	0.509	21	32.64	5	1	90.0101	0.599882	25.2	1.15177
4	7.95	125	986.3	989.2	987.75	2.9	2.2	29.2	0.509	21	32.64	5	1	90.0101	0.599882	25.2	0.30594
1	7.37	175	906.5	912.4	909.45	4.9	2.8	30.8	0.68	22	91	15	1	95.232	0.383253	24.95	0.862319
2	7.37	175	906.5	912.4	909.45	4.9	2.8	30.8	0.68	22	91	15	1	95.232	0.383253	24.95	2.39533
3	7.37	175	906.5	912.4	909.45	4.9	2.8	30.8	0.68	22	91	15	1	95.232	0.383253	24.95	3.92451
4	7.37	175	906.5	912.4	909.45	4.9	2.8	30.8	0.68	22	91	15	1	95.232	0.383253	24.95	5.03594
5	7.37	175	906.5	912.4	909.45	4.9	2.8	30.8	0.68	22	91	15	1	95.232	0.383253	24.95	3.53742
6	7.37	175	906.5	912.4	909.45	4.9	2.8	30.8	0.68	22	91	15	1	95.232	0.383253	24.95	4.49172
7	7.37	175	906.5	912.4	909.45	4.9	2.8	30.8	0.68	22	91	15	1	95.232	0.383253	24.95	3.88618
8	7.37	175	906.5	912.4	909.45	4.9	2.8	30.8	0.68	22	91	15	1	95.232	0.383253	24.95	3.6639
9	7.37	175	906.5	912.4	909.45	4.9	2.8	30.8	0.68	22	91	15	1	95.232	0.383253	24.95	4.01649
10	7.37	175	906.5	912.4	909.45	4.9	2.8	30.8	0.68	22	91	15	1	95.232	0.383253	24.95	3.56808
11	7.37	175	906.5	912.4	909.45	4.9	2.8	30.8	0.68	22	91	15	1	95.232	0.383253	24.95	4.00882
12	7.37	175	906.5	912.4	909.45	4.9	2.8	30.8	0.68	22	91	15	1	95.232	0.383253	24.95	2.92805
1	7.37	175	914	919.7	916.85	4.7	3.3	29.2	0.19	26	91	15	1	95.232	0.126208	24.95	0.283967
2	7.37	175	914	919.7	916.85	4.7	3.3	29.2	0.19	26	91	15	1	95.232	0.126208	24.95	0.788798
3	7.37	175	914	919.7	916.85	4.7	3.3	29.2	0.19	26	91	15	1	95.232	0.126208	24.95	1.29237
4	7.37	175	914	919.7	916.85	4.7	3.3	29.2	0.19	26	91	15	1	95.232	0.126208	24.95	1.65837
5	7.37	175	914	919.7	916.85	4.7	3.3	29.2	0.19	26	91	15	1	95.232	0.126208	24.95	1.1649
6	7.37	175	914	919.7	916.85	4.7	3.3	29.2	0.19	26	91	15	1	95.232	0.126208	24.95	1.47915
7	7.37	175	914	919.7	916.85	4.7	3.3	29.2	0.19	26	91	15	1	95.232	0.126208	24.95	1.27975
8	7.37	175	914	919.7	916.85	4.7	3.3	29.2	0.19	26	91	15	1	95.232	0.126208	24.95	1.20655
9	7.37	175	914	919.7	916.85	4.7	3.3	29.2	0.19	26	91	15	1	95.232	0.126208	24.95	1.32266
10	7.37	175	914	919.7	916.85	4.7	3.3	29.2	0.19	26	91	15	1	95.232	0.126208	24.95	1.17499
11	7.37	175	914	919.7	916.85	4.7	3.3	29.2	0.19	26	91	15	1	95.232	0.126208	24.95	1.32013
12	7.37	175	914	919.7	916.85	4.7	3.3	29.2	0.19	26	91	15	1	95.232	0.126208	24.95	0.964227
1	9.82	175	928.6	931	929.8	2.4	1.4	27	0.12	24	113.96	19	1	82.5179	0.107143	25.08	0.109286
2	9.82	175	928.6	931	929.8	2.4	1.4	27	0.12	24	113.96	19	1	82.5179	0.107143	25.08	0.200357
3	9.82	175	928.6	931	929.8	2.4	1.4	27	0.12	24	113.96	19	1	82.5179	0.107143	25.08	0.278571
4	9.82	175	928.6	931	929.8	2.4	1.4	27	0.12	24	113.96	19	1	82.5179	0.107143	25.08	0.320357
5	9.82	175	928.6	931	929.8	2.4	1.4	27	0.12	24	113.96	19	1	82.5179	0.107143	25.08	0.236786
6	9.82	175	928.6	931	929.8	2.4	1.4	27	0.12	24	113.96	19	1	82.5179	0.107143	25.08	0.705
7	9.82	175	928.6	931	929.8	2.4	1.4	27	0.12	24	113.96	19	1	82.5179	0.107143	25.08	0.512143
8	9.82	175	928.6	931	929.8	2.4	1.4	27	0.12	24	113.96	19	1	82.5179	0.107143	25.08	0.362143
9	9.82	175	928.6	931	929.8	2.4	1.4	27	0.12	24	113.96	19	1	82.5179	0.107143	25.08	0.471429
10	9.82	175	928.6	931	929.8	2.4	1.4	27	0.12	24	113.96	19	1	82.5179	0.107143	25.08	0.362143
11	9.82	175	928.6	931	929.8	2.4	1.4	27	0.12	24	113.96	19	1	82.5179	0.107143	25.08	0.416786
12	9.82	175	928.6	931	929.8	2.4	1.4	27	0.12	24	113.96	19	1	82.5179	0.107143	25.08	0.303214
1	9.82	175	947	950.7	948.85	3.7	2.8	27.6	0.5	33	113.96	19	1	82.5179	0.892857	25.08	0.910714
2	9.82	175	947	950.7	948.85	3.7	2.8	27.6	0.5	33	113.96	19	1	82.5179	0.892857	25.08	1.66964
3	9.82	175	947	950.7	948.85	3.7	2.8	27.6	0.5	33	113.96	19	1	82.5179	0.892857	25.08	2.32143
4	9.82	175	947	950.7	948.85	3.7	2.8	27.6	0.5	33	113.96	19	1	82.5179	0.892857	25.08	2.66964
5	9.82	175	947	950.7	948.85	3.7	2.8	27.6	0.5	33	113.96	19	1	82.5179	0.892857	25.08	1.97321
6	9.82	175	947	950.7	948.85	3.7	2.8	27.6	0.5	33	113.96	19	1	82.5179	0.892857	25.08	5.875
7	9.82	175	947	950.7	948.85	3.7	2.8	27.6	0.5	33	113.96	19	1	82.5179	0.892857	25.08	4.26786
8	9.82	175	947	950.7	948.85	3.7	2.8	27.6	0.5	33	113.96	19	1	82.5179	0.892857	25.08	3.01786
9	9.82	175	947	950.7	948.85	3.7	2.8	27.6	0.5	33	113.96	19	1	82.5179	0.892857	25.08	3.92857
10	9.82	175	947	950.7	948.85	3.7	2.8	27.6	0.5	33	113.96	19	1	82.5179	0.892857	25.08	3.01786
11	9.82	175	947	950.7	948.85	3.7	2.8	27.6	0.5	33	113.96	19	1	82.5179	0.892857	25.08	3.47321
12	9.82	175	947	950.7	948.85	3.7	2.8	27.6	0.5	33	113.96	19	1	82.5179	0.892857	25.08	2.52679
1	7.95	125	857.1	858.6	857.85	1.5	0.9	27.3	0.13	32	52.64	8.5	1	85.4111	0.0346461	24.97	0.215499
2	7.95	125	857.1	858.6	857.85	1.5	0.9	27.3	0.13	32	52.64	8.5	1	85.4111	0.0346461	24.97	0.105671
3	7.95	125	857.1	858.6	857.85	1.5	0.9	27.3	0.13	32	52.64	8.5	1	85.4111	0.0346461	24.97	0.10671
4	7.95	125	857.1	858.6	857.85	1.5	0.9	27.3	0.13	32	52.64	8.5	1	85.4111	0.0346461	24.97	0.0547409
1	10.59	125	1115.2	1116.2	1115.7	1	0.5	28.4	0.19	28	91.84	15	1	88.883	0.00832107	24.9	0.0125648
2	10.59	125	1115.2	1116.2	1115.7	1	0.5	28.4	0.19	28	91.84	15	1	88.883	0.00832107	24.9	0.037112
3	10.59	125	1115.2	1116.2	1115.7	1	0.5	28.4	0.19	28	91.84	15	1	88.883	0.00832107	24.9	0.0194713
4	10.59	125	1115.2	1116.2	1115.7	1	0.5	28.4	0.19	28	91.84	15	1	88.883	0.00832107	24.9	0.0199706
5	10.59	125	1115.2	1116.2	1115.7	1	0.5	28.4	0.19	28	91.84	15	1	88.883	0.00832107	24.9	0.0213019
6	10.59	125	1115.2	1116.2	1115.7	1	0.5	28.4	0.19	28	91.84	15	1	88.883	0.00832107	24.9	0.0218844
7	10.59	125	1115.2	1116.2	1115.7	1	0.5	28.4	0.19	28	91.84	15	1	88.883	0.00832107	24.9	0.020137
8	10.59	125	1115.2	1116.2	1115.7	1	0.5	28.4	0.19	28	91.84	15	1	88.883	0.00832107	24.9	0.0164757
9	10.59	125	1115.2	1116.2	1115.7	1	0.5	28.4	0.19	28	91.84	15	1	88.883	0.00832107	24.9	0.0209691
10	10.59	125	1115.2	1116.2	1115.7	1	0.5	28.4	0.19	28	91.84	15	1	88.883	0.00832107	24.9	0.0223005
11	10.59	125	1115.2	1116.2	1115.7	1	0.5	28.4	0.19	28	91.84	15	1	88.883	0.00832107	24.9	0.0171414
12	10.59	125	1115.2	1116.2	1115.7	1	0.5	28.4	0.19	28	91.84	15	1	88.883	0.00832107	24.9	0.0233822
1	7.95	125	884	885.9	884.95	1.9	1.9	30	0.547	19	90.72	15	1	89.5571	0.247842	24.95	0.753439
2	7.95	125	884	885.9	884.95	1.9	1.9	30	0.547	19	90.72	15	1	89.5571	0.247842	24.95	0.921972
3	7.95	125	884	885.9	884.95	1.9	1.9	30	0.547	19	90.72	15	1	89.5571	0.247842	24.95	1.55149
4	7.95	125	884	885.9	884.95	1.9	1.9	30	0.547	19	90.72	15	1	89.5571	0.247842	24.95	1.80925
5	7.95	125	884	885.9	884.95	1.9	1.9	30	0.547	19	90.72	15	1	89.5571	0.247842	24.95	2.39167
6	7.95	125	884	885.9	884.95	1.9	1.9	30	0.547	19	90.72	15	1	89.5571	0.247842	24.95	2.17357
7	7.95	125	884	885.9	884.95	1.9	1.9	30	0.547	19	90.72	15	1	89.5571	0.247842	24.95	1.73489
8	7.95	125	884	885.9	884.95	1.9	1.9	30	0.547	19	90.72	15	1	89.5571	0.247842	24.95	1.48953
9	7.95	125	884	885.9	884.95	1.9	1.9	30	0.547	19	90.72	15	1	89.5571	0.247842	24.95	1.24664
10	7.95	125	884	885.9	884.95	1.9	1.9	30	0.547	19	90.72	15	1	89.5571	0.247842	24.95	1.00872
11	7.95	125	884	885.9	884.95	1.9	1.9	30	0.547	19	90.72	15	1	89.5571	0.247842	24.95	0.671651
12	7.95	125	884	885.9	884.95	1.9	1.9	30	0.547	19	90.72	15	1	89.5571	0.247842	24.95	0.703871
1	7.95	125	1007.6	1009.2	1008.4	1.6	1.6	30.4	0.496	36	53.28	8.5	1	91.6812	0.342867	25.06	5.08815
2	7.95	125	1007.6	1009.2	1008.4	1.6	1.6	30.4	0.496	36	53.28	8.5	1	91.6812	0.342867	25.06	3.98411
3	7.95	125	1007.6	1009.2	1008.4	1.6	1.6	30.4	0.496	36	53.28	8.5	1	91.6812	0.342867	25.06	2.91437
4	7.95	125	1007.6	1009.2	1008.4	1.6	1.6	30.4	0.496	36	53.28	8.5	1	91.6812	0.342867	25.06	3.53839
5	7.95	125	1007.6	1009.2	1008.4	1.6	1.6	30.4	0.496	36	53.28	8.5	1	91.6812	0.342867	25.06	2.3555
6	7.95	125	1007.6	1009.2	1008.4	1.6	1.6	30.4	0.496	36	53.28	8.5	1	91.6812	0.342867	25.06	2.68465
7	7.95	125	1007.6	1009.2	1008.4	1.6	1.6	30.4	0.496	36	53.28	8.5	1	91.6812	0.342867	25.06	1.66291
8	7.95	125	1007.6	1009.2	1008.4	1.6	1.6	30.4	0.496	36	53.28	8.5	1	91.6812	0.342867	25.06	1.95777
9	7.95	125	1007.6	1009.2	1008.4	1.6	1.6	30.4	0.496	36	53.28	8.5	1	91.6812	0.342867	25.06	1.67319
10	7.95	125	1007.6	1009.2	1008.4	1.6	1.6	30.4	0.496	36	53.28	8.5	1	91.6812	0.342867	25.06	1.53604
11	7.95	125	1007.6	1009.2	1008.4	1.6	1.6	30.4	0.496	36	53.28	8.5	1	91.6812	0.342867	25.06	1.54976
12	7.95	125	1007.6	1009.2	1008.4	1.6	1.6	30.4	0.496	36	53.28	8.5	1	91.6812	0.342867	25.06	1.34061
1	7.95	125	1011.5	1016.3	1013.9	3.2	2.6	31.6	0.585	53	53.28	8.5	1	91.6812	0.657133	25.06	9.75185
2	7.95	125	1011.5	1016.3	1013.9	3.2	2.6	31.6	0.585	53	53.28	8.5	1	91.6812	0.657133	25.06	7.63589
3	7.95	125	1011.5	1016.3	1013.9	3.2	2.6	31.6	0.585	53	53.28	8.5	1	91.6812	0.657133	25.06	5.58563
4	7.95	125	1011.5	1016.3	1013.9	3.2	2.6	31.6	0.585	53	53.28	8.5	1	91.6812	0.657133	25.06	6.78161
5	7.95	125	1011.5	1016.3	1013.9	3.2	2.6	31.6	0.585	53	53.28	8.5	1	91.6812	0.657133	25.06	4.5145
6	7.95	125	1011.5	1016.3	1013.9	3.2	2.6	31.6	0.585	53	53.28	8.5	1	91.6812	0.657133	25.06	5.14535
7	7.95	125	1011.5	1016.3	1013.9	3.2	2.6	31.6	0.585	53	53.28	8.5	1	91.6812	0.657133	25.06	3.18709
8	7.95	125	1011.5	1016.3	1013.9	3.2	2.6	31.6	0.585	53	53.28	8.5	1	91.6812	0.657133	25.06	3.75223
9	7.95	125	1011.5	1016.3	1013.9	3.2	2.6	31.6	0.585	53	53.28	8.5	1	91.6812	0.657133	25.06	3.20681
10	7.95	125	1011.5	1016.3	1013.9	3.2	2.6	31.6	0.585	53	53.28	8.5	1	91.6812	0.657133	25.06	2.94396
11	7.95	125	1011.5	1016.3	1013.9	3.2	2.6	31.6	0.585	53	53.28	8.5	1	91.6812	0.657133	25.06	2.97024
12	7.95	125	1011.5	1016.3	1013.9	3.2	2.6	31.6	0.585	53	53.28	8.5	1	91.6812	0.657133	25.06	2.56939
1	7.95	125	840.1	844	842.05	3.9	2.8	30.2	0.669	20	68.32	9.5	1	87.3042	0.246302	21.04	1.40146
2	7.95	125	840.1	844	842.05	3.9	2.8	30.2	0.669	20	68.32	9.5	1	87.3042	0.246302	21.04	1.33742
3	7.95	125	840.1	844	842.05	3.9	2.8	30.2	0.669	20	68.32	9.5	1	87.3042	0.246302	21.04	0.625607
4	7.95	125	840.1	844	842.05	3.9	2.8	30.2	0.669	20	68.32	9.5	1	87.3042	0.246302	21.04	0.70935
5	7.95	125	840.1	844	842.05	3.9	2.8	30.2	0.669	20	68.32	9.5	1	87.3042	0.246302	21.04	0.635459
6	7.95	125	840.1	844	842.05	3.9	2.8	30.2	0.669	20	68.32	9.5	1	87.3042	0.246302	21.04	0.559105
7	7.95	125	840.1	844	842.05	3.9	2.8	30.2	0.669	20	68.32	9.5	1	87.3042	0.246302	21.04	0.992597
8	7.95	125	840.1	844	842.05	3.9	2.8	30.2	0.669	20	68.32	9.5	1	87.3042	0.246302	21.04	0.975356
9	7.95	125	840.1	844	842.05	3.9	2.8	30.2	0.669	20	68.32	9.5	1	87.3042	0.246302	21.04	1.27584
10	7.95	125	840.1	844	842.05	3.9	2.8	30.2	0.669	20	68.32	9.5	1	87.3042	0.246302	21.04	1.10343
11	7.95	125	840.1	844	842.05	3.9	2.8	30.2	0.669	20	68.32	9.5	1	87.3042	0.246302	21.04	0.834964
12	7.95	125	840.1	844	842.05	3.9	2.8	30.2	0.669	20	68.32	9.5	1	87.3042	0.246302	21.04	0.541864
1	7.95	125	857.4	865.6	861.5	8.2	7.3	31	0.657	50	70	11.5	1	87.3042	0.630626	25.09	3.58826
2	7.95	125	857.4	865.6	861.5	8.2	7.3	31	0.657	50	70	11.5	1	87.3042	0.630626	25.09	3.4243
3	7.95	125	857.4	865.6	861.5	8.2	7.3	31	0.657	50	70	11.5	1	87.3042	0.630626	25.09	1.60179
4	7.95	125	857.4	865.6	861.5	8.2	7.3	31	0.657	50	70	11.5	1	87.3042	0.630626	25.09	1.8162
5	7.95	125	857.4	865.6	861.5	8.2	7.3	31	0.657	50	70	11.5	1	87.3042	0.630626	25.09	1.62702
6	7.95	125	857.4	865.6	861.5	8.2	7.3	31	0.657	50	70	11.5	1	87.3042	0.630626	25.09	1.43152
7	7.95	125	857.4	865.6	861.5	8.2	7.3	31	0.657	50	70	11.5	1	87.3042	0.630626	25.09	2.54142
8	7.95	125	857.4	865.6	861.5	8.2	7.3	31	0.657	50	70	11.5	1	87.3042	0.630626	25.09	2.49728
9	7.95	125	857.4	865.6	861.5	8.2	7.3	31	0.657	50	70	11.5	1	87.3042	0.630626	25.09	3.26664
10	7.95	125	857.4	865.6	861.5	8.2	7.3	31	0.657	50	70	11.5	1	87.3042	0.630626	25.09	2.8252
11	7.95	125	857.4	865.6	861.5	8.2	7.3	31	0.657	50	70	11.5	1	87.3042	0.630626	25.09	2.13782
12	7.95	125	857.4	865.6	861.5	8.2	7.3	31	0.657	50	70	11.5	1	87.3042	0.630626	25.09	1.38738
1	11.27	125	1110.8	1115.6	1113.2	3.2	1.9	29.1	0.699	18	53.76	8.5	1	99.0268	0.259704	25.06	0.870008
2	11.27	125	1110.8	1115.6	1113.2	3.2	1.9	29.1	0.699	18	53.76	8.5	1	99.0268	0.259704	25.06	1.09076
3	11.27	125	1110.8	1115.6	1113.2	3.2	1.9	29.1	0.699	18	53.76	8.5	1	99.0268	0.259704	25.06	0.88559
4	11.27	125	1110.8	1115.6	1113.2	3.2	1.9	29.1	0.699	18	53.76	8.5	1	99.0268	0.259704	25.06	0.945322
5	11.27	125	1110.8	1115.6	1113.2	3.2	1.9	29.1	0.699	18	53.76	8.5	1	99.0268	0.259704	25.06	0.607707
6	11.27	125	1110.8	1115.6	1113.2	3.2	1.9	29.1	0.699	18	53.76	8.5	1	99.0268	0.259704	25.06	0.558363
7	11.27	125	1110.8	1115.6	1113.2	3.2	1.9	29.1	0.699	18	53.76	8.5	1	99.0268	0.259704	25.06	0.441497
8	11.27	125	1110.8	1115.6	1113.2	3.2	1.9	29.1	0.699	18	53.76	8.5	1	99.0268	0.259704	25.06	0.309048
9	11.27	125	1110.8	1115.6	1113.2	3.2	1.9	29.1	0.699	18	53.76	8.5	1	99.0268	0.259704	25.06	0.249316
10	11.27	125	1110.8	1115.6	1113.2	3.2	1.9	29.1	0.699	18	53.76	8.5	1	99.0268	0.259704	25.06	0.342809
11	11.27	125	1110.8	1115.6	1113.2	3.2	1.9	29.1	0.699	18	53.76	8.5	1	99.0268	0.259704	25.06	0.373974
12	11.27	125	1110.8	1115.6	1113.2	3.2	1.9	29.1	0.699	18	53.76	8.5	1	99.0268	0.259704	25.06	0.322033
1	11.27	125	1117.1	1118.7	1117.9	1.6	0.2	23.7	0.052	21	98.4	19	1	99.0268	0.00203367	29.95	0.0068128
2	11.27	125	1117.1	1118.7	1117.9	1.6	0.2	23.7	0.052	21	98.4	19	1	99.0268	0.00203367	29.95	0.00854143
3	11.27	125	1117.1	1118.7	1117.9	1.6	0.2	23.7	0.052	21	98.4	19	1	99.0268	0.00203367	29.95	0.00693482
4	11.27	125	1117.1	1118.7	1117.9	1.6	0.2	23.7	0.052	21	98.4	19	1	99.0268	0.00203367	29.95	0.00740257
5	11.27	125	1117.1	1118.7	1117.9	1.6	0.2	23.7	0.052	21	98.4	19	1	99.0268	0.00203367	29.95	0.00475879
6	11.27	125	1117.1	1118.7	1117.9	1.6	0.2	23.7	0.052	21	98.4	19	1	99.0268	0.00203367	29.95	0.0043724
7	11.27	125	1117.1	1118.7	1117.9	1.6	0.2	23.7	0.052	21	98.4	19	1	99.0268	0.00203367	29.95	0.00345724
8	11.27	125	1117.1	1118.7	1117.9	1.6	0.2	23.7	0.052	21	98.4	19	1	99.0268	0.00203367	29.95	0.00242007
9	11.27	125	1117.1	1118.7	1117.9	1.6	0.2	23.7	0.052	21	98.4	19	1	99.0268	0.00203367	29.95	0.00195233
10	11.27	125	1117.1	1118.7	1117.9	1.6	0.2	23.7	0.052	21	98.4	19	1	99.0268	0.00203367	29.95	0.00268445
11	11.27	125	1117.1	1118.7	1117.9	1.6	0.2	23.7	0.052	21	98.4	19	1	99.0268	0.00203367	29.95	0.00292849
12	11.27	125	1117.1	1118.7	1117.9	1.6	0.2	23.7	0.052	21	98.4	19	1	99.0268	0.00203367	29.95	0.00252175
1	11.27	125	1122.2	1124.2	1123.2	2	1	29.3	0.617	18	53.76	8.5	1	99.0268	0.120652	25.06	0.404183
2	11.27	125	1122.2	1124.2	1123.2	2	1	29.3	0.617	18	53.76	8.5	1	99.0268	0.120652	25.06	0.506737
3	11.27	125	1122.2	1124.2	1123.2	2	1	29.3	0.617	18	53.76	8.5	1	99.0268	0.120652	25.06	0.411422
4	11.27	125	1122.2	1124.2	1123.2	2	1	29.3	0.617	18	53.76	8.5	1	99.0268	0.120652	25.06	0.439172
5	11.27	125	1122.2	1124.2	1123.2	2	1	29.3	0.617	18	53.76	8.5	1	99.0268	0.120652	25.06	0.282325
6	11.27	125	1122.2	1124.2	1123.2	2	1	29.3	0.617	18	53.76	8.5	1	99.0268	0.120652	25.06	0.259401
7	11.27	125	1122.2	1124.2	1123.2	2	1	29.3	0.617	18	53.76	8.5	1	99.0268	0.120652	25.06	0.205108
8	11.27	125	1122.2	1124.2	1123.2	2	1	29.3	0.617	18	53.76	8.5	1	99.0268	0.120652	25.06	0.143575
9	11.27	125	1122.2	1124.2	1123.2	2	1	29.3	0.617	18	53.76	8.5	1	99.0268	0.120652	25.06	0.115825
10	11.27	125	1122.2	1124.2	1123.2	2	1	29.3	0.617	18	53.76	8.5	1	99.0268	0.120652	25.06	0.15926
11	11.27	125	1122.2	1124.2	1123.2	2	1	29.3	0.617	18	53.76	8.5	1	99.0268	0.120652	25.06	0.173738
12	11.27	125	1122.2	1124.2	1123.2	2	1	29.3	0.617	18	53.76	8.5	1	99.0268	0.120652	25.06	0.149608
1	11.27	125	1125.6	1129.4	1127.5	3.8	3.4	28.3	0.896	37	53.76	8.5	1	99.0268	0.59571	25.06	1.99563
2	11.27	125	1125.6	1129.4	1127.5	3.8	3.4	28.3	0.896	37	53.76	8.5	1	99.0268	0.59571	25.06	2.50198
3	11.27	125	1125.6	1129.4	1127.5	3.8	3.4	28.3	0.896	37	53.76	8.5	1	99.0268	0.59571	25.06	2.03137
4	11.27	125	1125.6	1129.4	1127.5	3.8	3.4	28.3	0.896	37	53.76	8.5	1	99.0268	0.59571	25.06	2.16838
5	11.27	125	1125.6	1129.4	1127.5	3.8	3.4	28.3	0.896	37	53.76	8.5	1	99.0268	0.59571	25.06	1.39396
6	11.27	125	1125.6	1129.4	1127.5	3.8	3.4	28.3	0.896	37	53.76	8.5	1	99.0268	0.59571	25.06	1.28078
7	11.27	125	1125.6	1129.4	1127.5	3.8	3.4	28.3	0.896	37	53.76	8.5	1	99.0268	0.59571	25.06	1.01271
8	11.27	125	1125.6	1129.4	1127.5	3.8	3.4	28.3	0.896	37	53.76	8.5	1	99.0268	0.59571	25.06	0.708895
9	11.27	125	1125.6	1129.4	1127.5	3.8	3.4	28.3	0.896	37	53.76	8.5	1	99.0268	0.59571	25.06	0.571881
10	11.27	125	1125.6	1129.4	1127.5	3.8	3.4	28.3	0.896	37	53.76	8.5	1	99.0268	0.59571	25.06	0.786337
11	11.27	125	1125.6	1129.4	1127.5	3.8	3.4	28.3	0.896	37	53.76	8.5	1	99.0268	0.59571	25.06	0.857822
12	11.27	125	1125.6	1129.4	1127.5	3.8	3.4	28.3	0.896	37	53.76	8.5	1	99.0268	0.59571	25.06	0.73868
1	9.97	175	931.1	933.8	932.45	2.7	0.6	26.2	0.067	28	140.84	23.5	1	0	0.00903168	24.96	0.132314
2	9.97	175	931.1	933.8	932.45	2.7	0.6	26.2	0.067	28	140.84	23.5	1	0	0.00903168	24.96	0.129514
3	9.97	175	931.1	933.8	932.45	2.7	0.6	26.2	0.067	28	140.84	23.5	1	0	0.00903168	24.96	0.114793
4	9.97	175	931.1	933.8	932.45	2.7	0.6	26.2	0.067	28	140.84	23.5	1	0	0.00903168	24.96	0.0873363
5	9.97	175	931.1	933.8	932.45	2.7	0.6	26.2	0.067	28	140.84	23.5	1	0	0.00903168	24.96	0.0720728
6	9.97	175	931.1	933.8	932.45	2.7	0.6	26.2	0.067	28	140.84	23.5	1	0	0.00903168	24.96	0.0646668
7	9.97	175	931.1	933.8	932.45	2.7	0.6	26.2	0.067	28	140.84	23.5	1	0	0.00903168	24.96	0.0701761
8	9.97	175	931.1	933.8	932.45	2.7	0.6	26.2	0.067	28	140.84	23.5	1	0	0.00903168	24.96	0.0629508
9	9.97	175	931.1	933.8	932.45	2.7	0.6	26.2	0.067	28	140.84	23.5	1	0	0.00903168	24.96	0.0494936
10	9.97	175	931.1	933.8	932.45	2.7	0.6	26.2	0.067	28	140.84	23.5	1	0	0.00903168	24.96	0.0492226
11	9.97	175	931.1	933.8	932.45	2.7	0.6	26.2	0.067	28	140.84	23.5	1	0	0.00903168	24.96	0.0575318
12	9.97	175	931.1	933.8	932.45	2.7	0.6	26.2	0.067	28	140.84	23.5	1	0	0.00903168	24.96	0.0540094
1	9.97	175	944.3	945.7	945	1.4	0.2	21.8	0.037	31	202.72	34	1	0	0.00166255	24.87	0.0243563
2	9.97	175	944.3	945.7	945	1.4	0.2	21.8	0.037	31	202.72	34	1	0	0.00166255	24.87	0.0238409
3	9.97	175	944.3	945.7	945	1.4	0.2	21.8	0.037	31	202.72	34	1	0	0.00166255	24.87	0.021131
4	9.97	175	944.3	945.7	945	1.4	0.2	21.8	0.037	31	202.72	34	1	0	0.00166255	24.87	0.0160768
5	9.97	175	944.3	945.7	945	1.4	0.2	21.8	0.037	31	202.72	34	1	0	0.00166255	24.87	0.0132671
6	9.97	175	944.3	945.7	945	1.4	0.2	21.8	0.037	31	202.72	34	1	0	0.00166255	24.87	0.0119038
7	9.97	175	944.3	945.7	945	1.4	0.2	21.8	0.037	31	202.72	34	1	0	0.00166255	24.87	0.012918
8	9.97	175	944.3	945.7	945	1.4	0.2	21.8	0.037	31	202.72	34	1	0	0.00166255	24.87	0.011588
9	9.97	175	944.3	945.7	945	1.4	0.2	21.8	0.037	31	202.72	34	1	0	0.00166255	24.87	0.00911076
10	9.97	175	944.3	945.7	945	1.4	0.2	21.8	0.037	31	202.72	34	1	0	0.00166255	24.87	0.00906089
11	9.97	175	944.3	945.7	945	1.4	0.2	21.8	0.037	31	202.72	34	1	0	0.00166255	24.87	0.0105904
12	9.97	175	944.3	945.7	945	1.4	0.2	21.8	0.037	31	202.72	34	1	0	0.00166255	24.87	0.00994204
1	9.97	175	955	956.7	955.85	1.7	1.3	28.6	1.009	30	140.84	23.5	1	0	0.294698	24.96	4.31732
2	9.97	175	955	956.7	955.85	1.7	1.3	28.6	1.009	30	140.84	23.5	1	0	0.294698	24.96	4.22597
3	9.97	175	955	956.7	955.85	1.7	1.3	28.6	1.009	30	140.84	23.5	1	0	0.294698	24.96	3.74561
4	9.97	175	955	956.7	955.85	1.7	1.3	28.6	1.009	30	140.84	23.5	1	0	0.294698	24.96	2.84973
5	9.97	175	955	956.7	955.85	1.7	1.3	28.6	1.009	30	140.84	23.5	1	0	0.294698	24.96	2.35169
6	9.97	175	955	956.7	955.85	1.7	1.3	28.6	1.009	30	140.84	23.5	1	0	0.294698	24.96	2.11004
7	9.97	175	955	956.7	955.85	1.7	1.3	28.6	1.009	30	140.84	23.5	1	0	0.294698	24.96	2.2898
8	9.97	175	955	956.7	955.85	1.7	1.3	28.6	1.009	30	140.84	23.5	1	0	0.294698	24.96	2.05404
9	9.97	175	955	956.7	955.85	1.7	1.3	28.6	1.009	30	140.84	23.5	1	0	0.294698	24.96	1.61494
10	9.97	175	955	956.7	955.85	1.7	1.3	28.6	1.009	30	140.84	23.5	1	0	0.294698	24.96	1.6061
11	9.97	175	955	956.7	955.85	1.7	1.3	28.6	1.009	30	140.84	23.5	1	0	0.294698	24.96	1.87723
12	9.97	175	955	956.7	955.85	1.7	1.3	28.6	1.009	30	140.84	23.5	1	0	0.294698	24.96	1.76229
1	7.95	125	819.1	823.6	821.35	3.3	1.8	29	0.402	17	58.92	8.5	1	86.767	0.205872	25.06	1.75815
2	7.95	125	819.1	823.6	821.35	3.3	1.8	29	0.402	17	58.92	8.5	1	86.767	0.205872	25.06	0.872899
3	7.95	125	819.1	823.6	821.35	3.3	1.8	29	0.402	17	58.92	8.5	1	86.767	0.205872	25.06	1.09318
4	7.95	125	819.1	823.6	821.35	3.3	1.8	29	0.402	17	58.92	8.5	1	86.767	0.205872	25.06	1.00672
5	7.95	125	819.1	823.6	821.35	3.3	1.8	29	0.402	17	58.92	8.5	1	86.767	0.205872	25.06	1.00054
6	7.95	125	819.1	823.6	821.35	3.3	1.8	29	0.402	17	58.92	8.5	1	86.767	0.205872	25.06	1.08289
7	7.95	125	819.1	823.6	821.35	3.3	1.8	29	0.402	17	58.92	8.5	1	86.767	0.205872	25.06	1.26611
1	7.95	125	868.2	870.1	869.15	1.6	0.9	26.5	0.156	27	79.15	13.5	1	75.9133	0.0586319	25	0.115505
2	7.95	125	868.2	870.1	869.15	1.6	0.9	26.5	0.156	27	79.15	13.5	1	75.9133	0.0586319	25	0.239805
3	7.95	125	868.2	870.1	869.15	1.6	0.9	26.5	0.156	27	79.15	13.5	1	75.9133	0.0586319	25	0.205212
4	7.95	125	868.2	870.1	869.15	1.6	0.9	26.5	0.156	27	79.15	13.5	1	75.9133	0.0586319	25	0.12899
5	7.95	125	868.2	870.1	869.15	1.6	0.9	26.5	0.156	27	79.15	13.5	1	75.9133	0.0586319	25	0.164169
6	7.95	125	868.2	870.1	869.15	1.6	0.9	26.5	0.156	27	79.15	13.5	1	75.9133	0.0586319	25	0.225733
7	7.95	125	868.2	870.1	869.15	1.6	0.9	26.5	0.156	27	79.15	13.5	1	75.9133	0.0586319	25	0.133681
8	7.95	125	868.2	870.1	869.15	1.6	0.9	26.5	0.156	27	79.15	13.5	1	75.9133	0.0586319	25	0.0920521
9	7.95	125	868.2	870.1	869.15	1.6	0.9	26.5	0.156	27	79.15	13.5	1	75.9133	0.0586319	25	0.22456
10	7.95	125	868.2	870.1	869.15	1.6	0.9	26.5	0.156	27	79.15	13.5	1	75.9133	0.0586319	25	0.0943974
11	7.95	125	868.2	870.1	869.15	1.6	0.9	26.5	0.156	27	79.15	13.5	1	75.9133	0.0586319	25	0.00996743
1	7.95	125	884	885.3	884.65	1.3	0.6	27.4	0.218	31	73.4	13.5	1	75.9133	0.0546229	25	0.107607
2	7.95	125	884	885.3	884.65	1.3	0.6	27.4	0.218	31	73.4	13.5	1	75.9133	0.0546229	25	0.223408
3	7.95	125	884	885.3	884.65	1.3	0.6	27.4	0.218	31	73.4	13.5	1	75.9133	0.0546229	25	0.19118
4	7.95	125	884	885.3	884.65	1.3	0.6	27.4	0.218	31	73.4	13.5	1	75.9133	0.0546229	25	0.12017
5	7.95	125	884	885.3	884.65	1.3	0.6	27.4	0.218	31	73.4	13.5	1	75.9133	0.0546229	25	0.152944
6	7.95	125	884	885.3	884.65	1.3	0.6	27.4	0.218	31	73.4	13.5	1	75.9133	0.0546229	25	0.210298
7	7.95	125	884	885.3	884.65	1.3	0.6	27.4	0.218	31	73.4	13.5	1	75.9133	0.0546229	25	0.12454
8	7.95	125	884	885.3	884.65	1.3	0.6	27.4	0.218	31	73.4	13.5	1	75.9133	0.0546229	25	0.085758
9	7.95	125	884	885.3	884.65	1.3	0.6	27.4	0.218	31	73.4	13.5	1	75.9133	0.0546229	25	0.209206
10	7.95	125	884	885.3	884.65	1.3	0.6	27.4	0.218	31	73.4	13.5	1	75.9133	0.0546229	25	0.0879429
11	7.95	125	884	885.3	884.65	1.3	0.6	27.4	0.218	31	73.4	13.5	1	75.9133	0.0546229	25	0.00928589
1	8.92	175	875.2	878	876.6	2.8	2.2	30.5	0.508	36	139.72	23.5	1	94.8249	0.134024	25.1	0.700946
2	8.92	175	875.2	878	876.6	2.8	2.2	30.5	0.508	36	139.72	23.5	1	94.8249	0.134024	25.1	0.717029
3	8.92	175	875.2	878	876.6	2.8	2.2	30.5	0.508	36	139.72	23.5	1	94.8249	0.134024	25.1	0.873837
4	8.92	175	875.2	878	876.6	2.8	2.2	30.5	0.508	36	139.72	23.5	1	94.8249	0.134024	25.1	1.26653
5	8.92	175	875.2	878	876.6	2.8	2.2	30.5	0.508	36	139.72	23.5	1	94.8249	0.134024	25.1	1.52787
6	8.92	175	875.2	878	876.6	2.8	2.2	30.5	0.508	36	139.72	23.5	1	94.8249	0.134024	25.1	1.38045
7	8.92	175	875.2	878	876.6	2.8	2.2	30.5	0.508	36	139.72	23.5	1	94.8249	0.134024	25.1	1.27591
8	8.92	175	875.2	878	876.6	2.8	2.2	30.5	0.508	36	139.72	23.5	1	94.8249	0.134024	25.1	1.50241
9	8.92	175	875.2	878	876.6	2.8	2.2	30.5	0.508	36	139.72	23.5	1	94.8249	0.134024	25.1	1.32148
10	8.92	175	875.2	878	876.6	2.8	2.2	30.5	0.508	36	139.72	23.5	1	94.8249	0.134024	25.1	0.879198
11	8.92	175	875.2	878	876.6	2.8	2.2	30.5	0.508	36	139.72	23.5	1	94.8249	0.134024	25.1	0.674141
1	8.92	175	879.7	881.9	880.8	2.2	1.6	29.8	0.457	35	139.72	23.5	1	94.8249	0.0876865	25.1	0.4586
2	8.92	175	879.7	881.9	880.8	2.2	1.6	29.8	0.457	35	139.72	23.5	1	94.8249	0.0876865	25.1	0.469123
3	8.92	175	879.7	881.9	880.8	2.2	1.6	29.8	0.457	35	139.72	23.5	1	94.8249	0.0876865	25.1	0.571716
4	8.92	175	879.7	881.9	880.8	2.2	1.6	29.8	0.457	35	139.72	23.5	1	94.8249	0.0876865	25.1	0.828637
5	8.92	175	879.7	881.9	880.8	2.2	1.6	29.8	0.457	35	139.72	23.5	1	94.8249	0.0876865	25.1	0.999626
6	8.92	175	879.7	881.9	880.8	2.2	1.6	29.8	0.457	35	139.72	23.5	1	94.8249	0.0876865	25.1	0.903171
7	8.92	175	879.7	881.9	880.8	2.2	1.6	29.8	0.457	35	139.72	23.5	1	94.8249	0.0876865	25.1	0.834775
8	8.92	175	879.7	881.9	880.8	2.2	1.6	29.8	0.457	35	139.72	23.5	1	94.8249	0.0876865	25.1	0.982965
9	8.92	175	879.7	881.9	880.8	2.2	1.6	29.8	0.457	35	139.72	23.5	1	94.8249	0.0876865	25.1	0.864589
10	8.92	175	879.7	881.9	880.8	2.2	1.6	29.8	0.457	35	139.72	23.5	1	94.8249	0.0876865	25.1	0.575223
11	8.92	175	879.7	881.9	880.8	2.2	1.6	29.8	0.457	35	139.72	23.5	1	94.8249	0.0876865	25.1	0.441063
1	9.02	175	898.4	904.1	901.25	3.7	2	29.5	0.389	32	74.62	12	1	93.4723	0.28541	25.27	2.26616
2	9.02	175	898.4	904.1	901.25	3.7	2	29.5	0.389	32	74.62	12	1	93.4723	0.28541	25.27	2.45453
3	9.02	175	898.4	904.1	901.25	3.7	2	29.5	0.389	32	74.62	12	1	93.4723	0.28541	25.27	1.84375
4	9.02	175	898.4	904.1	901.25	3.7	2	29.5	0.389	32	74.62	12	1	93.4723	0.28541	25.27	2.04925
5	9.02	175	898.4	904.1	901.25	3.7	2	29.5	0.389	32	74.62	12	1	93.4723	0.28541	25.27	2.37747
6	9.02	175	898.4	904.1	901.25	3.7	2	29.5	0.389	32	74.62	12	1	93.4723	0.28541	25.27	1.55263
7	9.02	175	898.4	904.1	901.25	3.7	2	29.5	0.389	32	74.62	12	1	93.4723	0.28541	25.27	1.47272
8	9.02	175	898.4	904.1	901.25	3.7	2	29.5	0.389	32	74.62	12	1	93.4723	0.28541	25.27	1.73244
9	9.02	175	898.4	904.1	901.25	3.7	2	29.5	0.389	32	74.62	12	1	93.4723	0.28541	25.27	1.87515
10	9.02	175	898.4	904.1	901.25	3.7	2	29.5	0.389	32	74.62	12	1	93.4723	0.28541	25.27	1.72959
11	9.02	175	898.4	904.1	901.25	3.7	2	29.5	0.389	32	74.62	12	1	93.4723	0.28541	25.27	1.61828
1	9.19	125	947.3	949.9	948.6	2.6	1.2	30.3	0.37	15	90.72	15	1	96.359	0.110629	25.07	0.67152
2	9.19	125	947.3	949.9	948.6	2.6	1.2	30.3	0.37	15	90.72	15	1	96.359	0.110629	25.07	0.467962
3	9.19	125	947.3	949.9	948.6	2.6	1.2	30.3	0.37	15	90.72	15	1	96.359	0.110629	25.07	0.299806
4	9.19	125	947.3	949.9	948.6	2.6	1.2	30.3	0.37	15	90.72	15	1	96.359	0.110629	25.07	0.315294
5	9.19	125	947.3	949.9	948.6	2.6	1.2	30.3	0.37	15	90.72	15	1	96.359	0.110629	25.07	0.300912
6	9.19	125	947.3	949.9	948.6	2.6	1.2	30.3	0.37	15	90.72	15	1	96.359	0.110629	25.07	0.35512
7	9.19	125	947.3	949.9	948.6	2.6	1.2	30.3	0.37	15	90.72	15	1	96.359	0.110629	25.07	0.332994
8	9.19	125	947.3	949.9	948.6	2.6	1.2	30.3	0.37	15	90.72	15	1	96.359	0.110629	25.07	0.211302
9	9.19	125	947.3	949.9	948.6	2.6	1.2	30.3	0.37	15	90.72	15	1	96.359	0.110629	25.07	0.109523
10	9.19	125	947.3	949.9	948.6	2.6	1.2	30.3	0.37	15	90.72	15	1	96.359	0.110629	25.07	0.14935
11	9.19	125	947.3	949.9	948.6	2.6	1.2	30.3	0.37	15	90.72	15	1	96.359	0.110629	25.07	0.212408
12	9.19	125	947.3	949.9	948.6	2.6	1.2	30.3	0.37	15	90.72	15	1	96.359	0.110629	25.07	0.117267
1	9.19	125	978.6	981.5	980.05	2.9	0.8	28.4	0.214	15	135.24	22.5	1	96.359	0.0426571	24.91	0.258929
2	9.19	125	978.6	981.5	980.05	2.9	0.8	28.4	0.214	15	135.24	22.5	1	96.359	0.0426571	24.91	0.18044
3	9.19	125	978.6	981.5	980.05	2.9	0.8	28.4	0.214	15	135.24	22.5	1	96.359	0.0426571	24.91	0.115601
4	9.19	125	978.6	981.5	980.05	2.9	0.8	28.4	0.214	15	135.24	22.5	1	96.359	0.0426571	24.91	0.121573
5	9.19	125	978.6	981.5	980.05	2.9	0.8	28.4	0.214	15	135.24	22.5	1	96.359	0.0426571	24.91	0.116027
6	9.19	125	978.6	981.5	980.05	2.9	0.8	28.4	0.214	15	135.24	22.5	1	96.359	0.0426571	24.91	0.136929
7	9.19	125	978.6	981.5	980.05	2.9	0.8	28.4	0.214	15	135.24	22.5	1	96.359	0.0426571	24.91	0.128398
8	9.19	125	978.6	981.5	980.05	2.9	0.8	28.4	0.214	15	135.24	22.5	1	96.359	0.0426571	24.91	0.0814751
9	9.19	125	978.6	981.5	980.05	2.9	0.8	28.4	0.214	15	135.24	22.5	1	96.359	0.0426571	24.91	0.0422305
10	9.19	125	978.6	981.5	980.05	2.9	0.8	28.4	0.214	15	135.24	22.5	1	96.359	0.0426571	24.91	0.0575871
11	9.19	125	978.6	981.5	980.05	2.9	0.8	28.4	0.214	15	135.24	22.5	1	96.359	0.0426571	24.91	0.0819016
12	9.19	125	978.6	981.5	980.05	2.9	0.8	28.4	0.214	15	135.24	22.5	1	96.359	0.0426571	24.91	0.0452165
1	9.19	125	988.6	991.9	990.25	2.5	0.3	26.5	0.062	25	135.24	22.5	1	96.359	0.00463447	24.91	0.0281313
2	9.19	125	988.6	991.9	990.25	2.5	0.3	26.5	0.062	25	135.24	22.5	1	96.359	0.00463447	24.91	0.0196038
3	9.19	125	988.6	991.9	990.25	2.5	0.3	26.5	0.062	25	135.24	22.5	1	96.359	0.00463447	24.91	0.0125594
4	9.19	125	988.6	991.9	990.25	2.5	0.3	26.5	0.062	25	135.24	22.5	1	96.359	0.00463447	24.91	0.0132083
5	9.19	125	988.6	991.9	990.25	2.5	0.3	26.5	0.062	25	135.24	22.5	1	96.359	0.00463447	24.91	0.0126058
6	9.19	125	988.6	991.9	990.25	2.5	0.3	26.5	0.062	25	135.24	22.5	1	96.359	0.00463447	24.91	0.0148767
7	9.19	125	988.6	991.9	990.25	2.5	0.3	26.5	0.062	25	135.24	22.5	1	96.359	0.00463447	24.91	0.0139498
8	9.19	125	988.6	991.9	990.25	2.5	0.3	26.5	0.062	25	135.24	22.5	1	96.359	0.00463447	24.91	0.00885185
9	9.19	125	988.6	991.9	990.25	2.5	0.3	26.5	0.062	25	135.24	22.5	1	96.359	0.00463447	24.91	0.00458813
10	9.19	125	988.6	991.9	990.25	2.5	0.3	26.5	0.062	25	135.24	22.5	1	96.359	0.00463447	24.91	0.00625654
11	9.19	125	988.6	991.9	990.25	2.5	0.3	26.5	0.062	25	135.24	22.5	1	96.359	0.00463447	24.91	0.00889819
12	9.19	125	988.6	991.9	990.25	2.5	0.3	26.5	0.062	25	135.24	22.5	1	96.359	0.00463447	24.91	0.00491254
1	7.95	125	882	883.2	882.6	1.2	0.6	28.3	0.301	26	90.72	15	1	88.3832	0.0460139	25	0.237892
2	7.95	125	882	883.2	882.6	1.2	0.6	28.3	0.301	26	90.72	15	1	88.3832	0.0460139	25	0.23283
3	7.95	125	882	883.2	882.6	1.2	0.6	28.3	0.301	26	90.72	15	1	88.3832	0.0460139	25	0.167951
4	7.95	125	882	883.2	882.6	1.2	0.6	28.3	0.301	26	90.72	15	1	88.3832	0.0460139	25	0.176693
5	7.95	125	882	883.2	882.6	1.2	0.6	28.3	0.301	26	90.72	15	1	88.3832	0.0460139	25	0.110433
6	7.95	125	882	883.2	882.6	1.2	0.6	28.3	0.301	26	90.72	15	1	88.3832	0.0460139	25	0.0704013
7	7.95	125	882	883.2	882.6	1.2	0.6	28.3	0.301	26	90.72	15	1	88.3832	0.0460139	25	0.0400321
8	7.95	125	882	883.2	882.6	1.2	0.6	28.3	0.301	26	90.72	15	1	88.3832	0.0460139	25	0.0400321
9	7.95	125	882	883.2	882.6	1.2	0.6	28.3	0.301	26	90.72	15	1	88.3832	0.0460139	25	0.0326699
1	7.95	125	894.3	897.8	896.05	3.5	2.3	31	0.657	21	90.72	15	1	88.3832	0.385003	25	1.99047
2	7.95	125	894.3	897.8	896.05	3.5	2.3	31	0.657	21	90.72	15	1	88.3832	0.385003	25	1.94812
3	7.95	125	894.3	897.8	896.05	3.5	2.3	31	0.657	21	90.72	15	1	88.3832	0.385003	25	1.40526
4	7.95	125	894.3	897.8	896.05	3.5	2.3	31	0.657	21	90.72	15	1	88.3832	0.385003	25	1.47841
5	7.95	125	894.3	897.8	896.05	3.5	2.3	31	0.657	21	90.72	15	1	88.3832	0.385003	25	0.924008
6	7.95	125	894.3	897.8	896.05	3.5	2.3	31	0.657	21	90.72	15	1	88.3832	0.385003	25	0.589055
7	7.95	125	894.3	897.8	896.05	3.5	2.3	31	0.657	21	90.72	15	1	88.3832	0.385003	25	0.334953
8	7.95	125	894.3	897.8	896.05	3.5	2.3	31	0.657	21	90.72	15	1	88.3832	0.385003	25	0.334953
9	7.95	125	894.3	897.8	896.05	3.5	2.3	31	0.657	21	90.72	15	1	88.3832	0.385003	25	0.273352
1	10.94	175	901.8	903.6	902.7	1.8	1.4	27.7	0.6	31	113.96	19	1	96.0588	0.512195	25.08	1.69024
2	10.94	175	901.8	903.6	902.7	1.8	1.4	27.7	0.6	31	113.96	19	1	96.0588	0.512195	25.08	1.05
3	10.94	175	901.8	903.6	902.7	1.8	1.4	27.7	0.6	31	113.96	19	1	96.0588	0.512195	25.08	1.05
4	10.94	175	901.8	903.6	902.7	1.8	1.4	27.7	0.6	31	113.96	19	1	96.0588	0.512195	25.08	0.911707
5	10.94	175	901.8	903.6	902.7	1.8	1.4	27.7	0.6	31	113.96	19	1	96.0588	0.512195	25.08	0.819512
6	10.94	175	901.8	903.6	902.7	1.8	1.4	27.7	0.6	31	113.96	19	1	96.0588	0.512195	25.08	0.583902
7	10.94	175	901.8	903.6	902.7	1.8	1.4	27.7	0.6	31	113.96	19	1	96.0588	0.512195	25.08	0.363659
8	10.94	175	901.8	903.6	902.7	1.8	1.4	27.7	0.6	31	113.96	19	1	96.0588	0.512195	25.08	0.204878
9	10.94	175	901.8	903.6	902.7	1.8	1.4	27.7	0.6	31	113.96	19	1	96.0588	0.512195	25.08	0.271463
1	9.05	175	885.8	888.2	887	2.4	1.2	29.4	0.16	21	128.8	23.5	1	91.8487	0.0198136	25	0.00752918
2	9.05	175	885.8	888.2	887	2.4	1.2	29.4	0.16	21	128.8	23.5	1	91.8487	0.0198136	25	0.108975
3	9.05	175	885.8	888.2	887	2.4	1.2	29.4	0.16	21	128.8	23.5	1	91.8487	0.0198136	25	0.100455
4	9.05	175	885.8	888.2	887	2.4	1.2	29.4	0.16	21	128.8	23.5	1	91.8487	0.0198136	25	0.0410142
5	9.05	175	885.8	888.2	887	2.4	1.2	29.4	0.16	21	128.8	23.5	1	91.8487	0.0198136	25	0.0475527
6	9.05	175	885.8	888.2	887	2.4	1.2	29.4	0.16	21	128.8	23.5	1	91.8487	0.0198136	25	0.000198136
1	9.05	175	912.8	916.2	914.5	3.4	2.7	30.5	1.377	28	89.88	15	1	91.8487	0.383672	25	0.145795
2	9.05	175	912.8	916.2	914.5	3.4	2.7	30.5	1.377	28	89.88	15	1	91.8487	0.383672	25	2.1102
3	9.05	175	912.8	916.2	914.5	3.4	2.7	30.5	1.377	28	89.88	15	1	91.8487	0.383672	25	1.94522
4	9.05	175	912.8	916.2	914.5	3.4	2.7	30.5	1.377	28	89.88	15	1	91.8487	0.383672	25	0.794202
5	9.05	175	912.8	916.2	914.5	3.4	2.7	30.5	1.377	28	89.88	15	1	91.8487	0.383672	25	0.920814
6	9.05	175	912.8	916.2	914.5	3.4	2.7	30.5	1.377	28	89.88	15	1	91.8487	0.383672	25	0.00383672
1	9.55	125	994.7	999	996.85	1.3	0.3	25.5	0.102	24	100.24	16.5	1	88.2309	0.0133706	25	0.114319
2	9.55	125	994.7	999	996.85	1.3	0.3	25.5	0.102	24	100.24	16.5	1	88.2309	0.0133706	25	0.108436
3	9.55	125	994.7	999	996.85	1.3	0.3	25.5	0.102	24	100.24	16.5	1	88.2309	0.0133706	25	0.144135
4	9.55	125	994.7	999	996.85	1.3	0.3	25.5	0.102	24	100.24	16.5	1	88.2309	0.0133706	25	0.135043
5	9.55	125	994.7	999	996.85	1.3	0.3	25.5	0.102	24	100.24	16.5	1	88.2309	0.0133706	25	0.130096
6	9.55	125	994.7	999	996.85	1.3	0.3	25.5	0.102	24	100.24	16.5	1	88.2309	0.0133706	25	0.12555
7	9.55	125	994.7	999	996.85	1.3	0.3	25.5	0.102	24	100.24	16.5	1	88.2309	0.0133706	25	0.112982
8	9.55	125	994.7	999	996.85	1.3	0.3	25.5	0.102	24	100.24	16.5	1	88.2309	0.0133706	25	0.0977392
9	9.55	125	994.7	999	996.85	1.3	0.3	25.5	0.102	24	100.24	16.5	1	88.2309	0.0133706	25	0.198554
10	9.55	125	994.7	999	996.85	1.3	0.3	25.5	0.102	24	100.24	16.5	1	88.2309	0.0133706	25	0.199757
11	9.55	125	994.7	999	996.85	1.3	0.3	25.5	0.102	24	100.24	16.5	1	88.2309	0.0133706	25	0.0945303
12	9.55	125	994.7	999	996.85	1.3	0.3	25.5	0.102	24	100.24	16.5	1	88.2309	0.0133706	25	0.0155099
1	9.55	125	1004.8	1007.1	1005.95	2.3	2	30.6	0.652	24	91.28	15	1	88.2309	0.569781	25	4.87162
2	9.55	125	1004.8	1007.1	1005.95	2.3	2	30.6	0.652	24	91.28	15	1	88.2309	0.569781	25	4.62092
3	9.55	125	1004.8	1007.1	1005.95	2.3	2	30.6	0.652	24	91.28	15	1	88.2309	0.569781	25	6.14224
4	9.55	125	1004.8	1007.1	1005.95	2.3	2	30.6	0.652	24	91.28	15	1	88.2309	0.569781	25	5.75478
5	9.55	125	1004.8	1007.1	1005.95	2.3	2	30.6	0.652	24	91.28	15	1	88.2309	0.569781	25	5.54397
6	9.55	125	1004.8	1007.1	1005.95	2.3	2	30.6	0.652	24	91.28	15	1	88.2309	0.569781	25	5.35024
7	9.55	125	1004.8	1007.1	1005.95	2.3	2	30.6	0.652	24	91.28	15	1	88.2309	0.569781	25	4.81465
8	9.55	125	1004.8	1007.1	1005.95	2.3	2	30.6	0.652	24	91.28	15	1	88.2309	0.569781	25	4.1651
9	9.55	125	1004.8	1007.1	1005.95	2.3	2	30.6	0.652	24	91.28	15	1	88.2309	0.569781	25	8.46124
10	9.55	125	1004.8	1007.1	1005.95	2.3	2	30.6	0.652	24	91.28	15	1	88.2309	0.569781	25	8.51252
11	9.55	125	1004.8	1007.1	1005.95	2.3	2	30.6	0.652	24	91.28	15	1	88.2309	0.569781	25	4.02835
12	9.55	125	1004.8	1007.1	1005.95	2.3	2	30.6	0.652	24	91.28	15	1	88.2309	0.569781	25	0.660946
1	9.55	125	1011.7	1014.2	1012.95	2.5	2	30.2	0.477	22	91.28	15	1	88.2309	0.416849	25	3.56406
2	9.55	125	1011.7	1014.2	1012.95	2.5	2	30.2	0.477	22	91.28	15	1	88.2309	0.416849	25	3.38064
3	9.55	125	1011.7	1014.2	1012.95	2.5	2	30.2	0.477	22	91.28	15	1	88.2309	0.416849	25	4.49363
4	9.55	125	1011.7	1014.2	1012.95	2.5	2	30.2	0.477	22	91.28	15	1	88.2309	0.416849	25	4.21017
5	9.55	125	1011.7	1014.2	1012.95	2.5	2	30.2	0.477	22	91.28	15	1	88.2309	0.416849	25	4.05594
6	9.55	125	1011.7	1014.2	1012.95	2.5	2	30.2	0.477	22	91.28	15	1	88.2309	0.416849	25	3.91421
7	9.55	125	1011.7	1014.2	1012.95	2.5	2	30.2	0.477	22	91.28	15	1	88.2309	0.416849	25	3.52237
8	9.55	125	1011.7	1014.2	1012.95	2.5	2	30.2	0.477	22	91.28	15	1	88.2309	0.416849	25	3.04716
9	9.55	125	1011.7	1014.2	1012.95	2.5	2	30.2	0.477	22	91.28	15	1	88.2309	0.416849	25	6.1902
10	9.55	125	1011.7	1014.2	1012.95	2.5	2	30.2	0.477	22	91.28	15	1	88.2309	0.416849	25	6.22772
11	9.55	125	1011.7	1014.2	1012.95	2.5	2	30.2	0.477	22	91.28	15	1	88.2309	0.416849	25	2.94712
12	9.55	125	1011.7	1014.2	1012.95	2.5	2	30.2	0.477	22	91.28	15	1	88.2309	0.416849	25	0.483545
1	8.29	125	878.8	880.1	879.45	1.3	1	29.6	0.558	20	52.8	8.5	1	81.5697	0.0891915	25.06	0.211384
2	8.29	125	878.8	880.1	879.45	1.3	1	29.6	0.558	20	52.8	8.5	1	81.5697	0.0891915	25.06	0.341604
3	8.29	125	878.8	880.1	879.45	1.3	1	29.6	0.558	20	52.8	8.5	1	81.5697	0.0891915	25.06	0.260439
4	8.29	125	878.8	880.1	879.45	1.3	1	29.6	0.558	20	52.8	8.5	1	81.5697	0.0891915	25.06	0.418308
5	8.29	125	878.8	880.1	879.45	1.3	1	29.6	0.558	20	52.8	8.5	1	81.5697	0.0891915	25.06	0.513743
6	8.29	125	878.8	880.1	879.45	1.3	1	29.6	0.558	20	52.8	8.5	1	81.5697	0.0891915	25.06	0.0303251
7	8.29	125	878.8	880.1	879.45	1.3	1	29.6	0.558	20	52.8	8.5	1	81.5697	0.0891915	25.06	0.155193
1	8.29	125	886.1	887.7	886.9	1.6	0.5	28.1	0.286	19	70.32	11.5	1	81.5697	0.0228573	25.04	0.0541719
2	8.29	125	886.1	887.7	886.9	1.6	0.5	28.1	0.286	19	70.32	11.5	1	81.5697	0.0228573	25.04	0.0875436
3	8.29	125	886.1	887.7	886.9	1.6	0.5	28.1	0.286	19	70.32	11.5	1	81.5697	0.0228573	25.04	0.0667434
4	8.29	125	886.1	887.7	886.9	1.6	0.5	28.1	0.286	19	70.32	11.5	1	81.5697	0.0228573	25.04	0.107201
5	8.29	125	886.1	887.7	886.9	1.6	0.5	28.1	0.286	19	70.32	11.5	1	81.5697	0.0228573	25.04	0.131658
6	8.29	125	886.1	887.7	886.9	1.6	0.5	28.1	0.286	19	70.32	11.5	1	81.5697	0.0228573	25.04	0.00777149
7	8.29	125	886.1	887.7	886.9	1.6	0.5	28.1	0.286	19	70.32	11.5	1	81.5697	0.0228573	25.04	0.0397717
1	8.29	125	883.3	887	885.15	3.7	2.9	28.4	0.347	17	52.8	8.5	1	90.2071	0.159308	25.06	0.281975
2	8.29	125	883.3	887	885.15	3.7	2.9	28.4	0.347	17	52.8	8.5	1	90.2071	0.159308	25.06	0.444469
3	8.29	125	883.3	887	885.15	3.7	2.9	28.4	0.347	17	52.8	8.5	1	90.2071	0.159308	25.06	0.597404
4	8.29	125	883.3	887	885.15	3.7	2.9	28.4	0.347	17	52.8	8.5	1	90.2071	0.159308	25.06	0.786981
5	8.29	125	883.3	887	885.15	3.7	2.9	28.4	0.347	17	52.8	8.5	1	90.2071	0.159308	25.06	0.35685
6	8.29	125	883.3	887	885.15	3.7	2.9	28.4	0.347	17	52.8	8.5	1	90.2071	0.159308	25.06	0.172052
7	8.29	125	883.3	887	885.15	3.7	2.9	28.4	0.347	17	52.8	8.5	1	90.2071	0.159308	25.06	0.281975
8	8.29	125	883.3	887	885.15	3.7	2.9	28.4	0.347	17	52.8	8.5	1	90.2071	0.159308	25.06	0.060537
9	8.29	125	883.3	887	885.15	3.7	2.9	28.4	0.347	17	52.8	8.5	1	90.2071	0.159308	25.06	0.0685024
1	8.29	125	890.4	892.4	891.4	1.5	1.1	27.6	0.263	20	90.72	15	1	90.2071	0.0457992	24.95	0.0810646
2	8.29	125	890.4	892.4	891.4	1.5	1.1	27.6	0.263	20	90.72	15	1	90.2071	0.0457992	24.95	0.12778
3	8.29	125	890.4	892.4	891.4	1.5	1.1	27.6	0.263	20	90.72	15	1	90.2071	0.0457992	24.95	0.171747
4	8.29	125	890.4	892.4	891.4	1.5	1.1	27.6	0.263	20	90.72	15	1	90.2071	0.0457992	24.95	0.226248
5	8.29	125	890.4	892.4	891.4	1.5	1.1	27.6	0.263	20	90.72	15	1	90.2071	0.0457992	24.95	0.10259
6	8.29	125	890.4	892.4	891.4	1.5	1.1	27.6	0.263	20	90.72	15	1	90.2071	0.0457992	24.95	0.0494632
7	8.29	125	890.4	892.4	891.4	1.5	1.1	27.6	0.263	20	90.72	15	1	90.2071	0.0457992	24.95	0.0810646
8	8.29	125	890.4	892.4	891.4	1.5	1.1	27.6	0.263	20	90.72	15	1	90.2071	0.0457992	24.95	0.0174037
9	8.29	125	890.4	892.4	891.4	1.5	1.1	27.6	0.263	20	90.72	15	1	90.2071	0.0457992	24.95	0.0196937
1	7.95	125	880.5	881.2	880.85	0.7	0.2	27.7	0.172	0	53.04	8.5	1	97.581	0.00898032	24.9	0.0280186
2	7.95	125	880.5	881.2	880.85	0.7	0.2	27.7	0.172	0	53.04	8.5	1	97.581	0.00898032	24.9	0.0395134
3	7.95	125	880.5	881.2	880.85	0.7	0.2	27.7	0.172	0	53.04	8.5	1	97.581	0.00898032	24.9	0.0284676
4	7.95	125	880.5	881.2	880.85	0.7	0.2	27.7	0.172	0	53.04	8.5	1	97.581	0.00898032	24.9	0.0298147
5	7.95	125	880.5	881.2	880.85	0.7	0.2	27.7	0.172	0	53.04	8.5	1	97.581	0.00898032	24.9	0.0396032
6	7.95	125	880.5	881.2	880.85	0.7	0.2	27.7	0.172	0	53.04	8.5	1	97.581	0.00898032	24.9	0.0281084
7	7.95	125	880.5	881.2	880.85	0.7	0.2	27.7	0.172	0	53.04	8.5	1	97.581	0.00898032	24.9	0.0315209
8	7.95	125	880.5	881.2	880.85	0.7	0.2	27.7	0.172	0	53.04	8.5	1	97.581	0.00898032	24.9	0.0398726
9	7.95	125	880.5	881.2	880.85	0.7	0.2	27.7	0.172	0	53.04	8.5	1	97.581	0.00898032	24.9	0.0281982
10	7.95	125	880.5	881.2	880.85	0.7	0.2	27.7	0.172	0	53.04	8.5	1	97.581	0.00898032	24.9	0.0321495
11	7.95	125	880.5	881.2	880.85	0.7	0.2	27.7	0.172	0	53.04	8.5	1	97.581	0.00898032	24.9	0.0256837
12	7.95	125	880.5	881.2	880.85	0.7	0.2	27.7	0.172	0	53.04	8.5	1	97.581	0.00898032	24.9	0.0253245
1	7.95	125	883.7	886.2	884.95	2.5	1.9	30.3	0.573	0	70.56	11.5	1	97.581	0.284211	24.9	0.886739
2	7.95	125	883.7	886.2	884.95	2.5	1.9	30.3	0.573	0	70.56	11.5	1	97.581	0.284211	24.9	1.25053
3	7.95	125	883.7	886.2	884.95	2.5	1.9	30.3	0.573	0	70.56	11.5	1	97.581	0.284211	24.9	0.90095
4	7.95	125	883.7	886.2	884.95	2.5	1.9	30.3	0.573	0	70.56	11.5	1	97.581	0.284211	24.9	0.943582
5	7.95	125	883.7	886.2	884.95	2.5	1.9	30.3	0.573	0	70.56	11.5	1	97.581	0.284211	24.9	1.25337
6	7.95	125	883.7	886.2	884.95	2.5	1.9	30.3	0.573	0	70.56	11.5	1	97.581	0.284211	24.9	0.889582
7	7.95	125	883.7	886.2	884.95	2.5	1.9	30.3	0.573	0	70.56	11.5	1	97.581	0.284211	24.9	0.997582
8	7.95	125	883.7	886.2	884.95	2.5	1.9	30.3	0.573	0	70.56	11.5	1	97.581	0.284211	24.9	1.2619
9	7.95	125	883.7	886.2	884.95	2.5	1.9	30.3	0.573	0	70.56	11.5	1	97.581	0.284211	24.9	0.892424
10	7.95	125	883.7	886.2	884.95	2.5	1.9	30.3	0.573	0	70.56	11.5	1	97.581	0.284211	24.9	1.01748
11	7.95	125	883.7	886.2	884.95	2.5	1.9	30.3	0.573	0	70.56	11.5	1	97.581	0.284211	24.9	0.812844
12	7.95	125	883.7	886.2	884.95	2.5	1.9	30.3	0.573	0	70.56	11.5	1	97.581	0.284211	24.9	0.801476
1	7.95	125	895.5	902.4	898.95	6.4	5.7	29.1	0.475	0	70.56	11.5	1	97.581	0.706808	25	2.20524
2	7.95	125	895.5	902.4	898.95	6.4	5.7	29.1	0.475	0	70.56	11.5	1	97.581	0.706808	25	3.10996
3	7.95	125	895.5	902.4	898.95	6.4	5.7	29.1	0.475	0	70.56	11.5	1	97.581	0.706808	25	2.24058
4	7.95	125	895.5	902.4	898.95	6.4	5.7	29.1	0.475	0	70.56	11.5	1	97.581	0.706808	25	2.3466
5	7.95	125	895.5	902.4	898.95	6.4	5.7	29.1	0.475	0	70.56	11.5	1	97.581	0.706808	25	3.11702
6	7.95	125	895.5	902.4	898.95	6.4	5.7	29.1	0.475	0	70.56	11.5	1	97.581	0.706808	25	2.21231
7	7.95	125	895.5	902.4	898.95	6.4	5.7	29.1	0.475	0	70.56	11.5	1	97.581	0.706808	25	2.4809
8	7.95	125	895.5	902.4	898.95	6.4	5.7	29.1	0.475	0	70.56	11.5	1	97.581	0.706808	25	3.13823
9	7.95	125	895.5	902.4	898.95	6.4	5.7	29.1	0.475	0	70.56	11.5	1	97.581	0.706808	25	2.21938
10	7.95	125	895.5	902.4	898.95	6.4	5.7	29.1	0.475	0	70.56	11.5	1	97.581	0.706808	25	2.53037
11	7.95	125	895.5	902.4	898.95	6.4	5.7	29.1	0.475	0	70.56	11.5	1	97.581	0.706808	25	2.02147
12	7.95	125	895.5	902.4	898.95	6.4	5.7	29.1	0.475	0	70.56	11.5	1	97.581	0.706808	25	1.9932
1	8.8	175	925	931.6	928.3	4.5	2.3	30.2	0.52	23	90.72	15	1	0	0.148645	25.07	0.319587
2	8.8	175	925	931.6	928.3	4.5	2.3	30.2	0.52	23	90.72	15	1	0	0.148645	25.07	0.228914
3	8.8	175	925	931.6	928.3	4.5	2.3	30.2	0.52	23	90.72	15	1	0	0.148645	25.07	0.416207
4	8.8	175	925	931.6	928.3	4.5	2.3	30.2	0.52	23	90.72	15	1	0	0.148645	25.07	0.87998
5	8.8	175	925	931.6	928.3	4.5	2.3	30.2	0.52	23	90.72	15	1	0	0.148645	25.07	1.25011
6	8.8	175	925	931.6	928.3	4.5	2.3	30.2	0.52	23	90.72	15	1	0	0.148645	25.07	1.18322
7	8.8	175	925	931.6	928.3	4.5	2.3	30.2	0.52	23	90.72	15	1	0	0.148645	25.07	1.09552
8	8.8	175	925	931.6	928.3	4.5	2.3	30.2	0.52	23	90.72	15	1	0	0.148645	25.07	1.2724
9	8.8	175	925	931.6	928.3	4.5	2.3	30.2	0.52	23	90.72	15	1	0	0.148645	25.07	1.22781
10	8.8	175	925	931.6	928.3	4.5	2.3	30.2	0.52	23	90.72	15	1	0	0.148645	25.07	1.42402
11	8.8	175	925	931.6	928.3	4.5	2.3	30.2	0.52	23	90.72	15	1	0	0.148645	25.07	1.16092
12	8.8	175	925	931.6	928.3	4.5	2.3	30.2	0.52	23	90.72	15	1	0	0.148645	25.07	1.8655
1	8.8	175	947.8	950.9	949.35	1.8	1	30.6	0.37	25	90.72	15	1	0	0.0459856	25.07	0.098869
2	8.8	175	947.8	950.9	949.35	1.8	1	30.6	0.37	25	90.72	15	1	0	0.0459856	25.07	0.0708178
3	8.8	175	947.8	950.9	949.35	1.8	1	30.6	0.37	25	90.72	15	1	0	0.0459856	25.07	0.12876
4	8.8	175	947.8	950.9	949.35	1.8	1	30.6	0.37	25	90.72	15	1	0	0.0459856	25.07	0.272235
5	8.8	175	947.8	950.9	949.35	1.8	1	30.6	0.37	25	90.72	15	1	0	0.0459856	25.07	0.386739
6	8.8	175	947.8	950.9	949.35	1.8	1	30.6	0.37	25	90.72	15	1	0	0.0459856	25.07	0.366045
7	8.8	175	947.8	950.9	949.35	1.8	1	30.6	0.37	25	90.72	15	1	0	0.0459856	25.07	0.338914
8	8.8	175	947.8	950.9	949.35	1.8	1	30.6	0.37	25	90.72	15	1	0	0.0459856	25.07	0.393637
9	8.8	175	947.8	950.9	949.35	1.8	1	30.6	0.37	25	90.72	15	1	0	0.0459856	25.07	0.379841
10	8.8	175	947.8	950.9	949.35	1.8	1	30.6	0.37	25	90.72	15	1	0	0.0459856	25.07	0.440542
11	8.8	175	947.8	950.9	949.35	1.8	1	30.6	0.37	25	90.72	15	1	0	0.0459856	25.07	0.359147
12	8.8	175	947.8	950.9	949.35	1.8	1	30.6	0.37	25	90.72	15	1	0	0.0459856	25.07	0.577119
1	8.67	175	883.1	892.2	887.65	6.7	2.6	32.3	1.008	24	271.88	46	1	91.1258	0.214665	25	1.65292
2	8.67	175	883.1	892.2	887.65	6.7	2.6	32.3	1.008	24	271.88	46	1	91.1258	0.214665	25	1.46401
3	8.67	175	883.1	892.2	887.65	6.7	2.6	32.3	1.008	24	271.88	46	1	91.1258	0.214665	25	1.77098
4	8.67	175	883.1	892.2	887.65	6.7	2.6	32.3	1.008	24	271.88	46	1	91.1258	0.214665	25	1.87188
5	8.67	175	883.1	892.2	887.65	6.7	2.6	32.3	1.008	24	271.88	46	1	91.1258	0.214665	25	1.90837
6	8.67	175	883.1	892.2	887.65	6.7	2.6	32.3	1.008	24	271.88	46	1	91.1258	0.214665	25	1.78386
7	8.67	175	883.1	892.2	887.65	6.7	2.6	32.3	1.008	24	271.88	46	1	91.1258	0.214665	25	1.06688
8	8.67	175	883.1	892.2	887.65	6.7	2.6	32.3	1.008	24	271.88	46	1	91.1258	0.214665	25	0.671901
9	8.67	175	883.1	892.2	887.65	6.7	2.6	32.3	1.008	24	271.88	46	1	91.1258	0.214665	25	1.30302
10	8.67	175	883.1	892.2	887.65	6.7	2.6	32.3	1.008	24	271.88	46	1	91.1258	0.214665	25	1.054
11	8.67	175	883.1	892.2	887.65	6.7	2.6	32.3	1.008	24	271.88	46	1	91.1258	0.214665	25	0.571008
12	8.67	175	883.1	892.2	887.65	6.7	2.6	32.3	1.008	24	271.88	46	1	91.1258	0.214665	25	0.933792
1	8.67	175	895.9	906.6	901.25	9.7	6.5	32	1.224	20	52.92	8.5	1	91.1258	0.651661	25	5.01779
2	8.67	175	895.9	906.6	901.25	9.7	6.5	32	1.224	20	52.92	8.5	1	91.1258	0.651661	25	4.44433
3	8.67	175	895.9	906.6	901.25	9.7	6.5	32	1.224	20	52.92	8.5	1	91.1258	0.651661	25	5.3762
4	8.67	175	895.9	906.6	901.25	9.7	6.5	32	1.224	20	52.92	8.5	1	91.1258	0.651661	25	5.68248
5	8.67	175	895.9	906.6	901.25	9.7	6.5	32	1.224	20	52.92	8.5	1	91.1258	0.651661	25	5.79327
6	8.67	175	895.9	906.6	901.25	9.7	6.5	32	1.224	20	52.92	8.5	1	91.1258	0.651661	25	5.4153
7	8.67	175	895.9	906.6	901.25	9.7	6.5	32	1.224	20	52.92	8.5	1	91.1258	0.651661	25	3.23876
8	8.67	175	895.9	906.6	901.25	9.7	6.5	32	1.224	20	52.92	8.5	1	91.1258	0.651661	25	2.0397
9	8.67	175	895.9	906.6	901.25	9.7	6.5	32	1.224	20	52.92	8.5	1	91.1258	0.651661	25	3.95558
10	8.67	175	895.9	906.6	901.25	9.7	6.5	32	1.224	20	52.92	8.5	1	91.1258	0.651661	25	3.19966
11	8.67	175	895.9	906.6	901.25	9.7	6.5	32	1.224	20	52.92	8.5	1	91.1258	0.651661	25	1.73342
12	8.67	175	895.9	906.6	901.25	9.7	6.5	32	1.224	20	52.92	8.5	1	91.1258	0.651661	25	2.83473
1	8.67	175	908.6	911	909.8	2.4	1.6	32.1	1.02	23	272.16	46	1	91.1258	0.133674	25	1.02929
2	8.67	175	908.6	911	909.8	2.4	1.6	32.1	1.02	23	272.16	46	1	91.1258	0.133674	25	0.911657
3	8.67	175	908.6	911	909.8	2.4	1.6	32.1	1.02	23	272.16	46	1	91.1258	0.133674	25	1.10281
4	8.67	175	908.6	911	909.8	2.4	1.6	32.1	1.02	23	272.16	46	1	91.1258	0.133674	25	1.16564
5	8.67	175	908.6	911	909.8	2.4	1.6	32.1	1.02	23	272.16	46	1	91.1258	0.133674	25	1.18836
6	8.67	175	908.6	911	909.8	2.4	1.6	32.1	1.02	23	272.16	46	1	91.1258	0.133674	25	1.11083
7	8.67	175	908.6	911	909.8	2.4	1.6	32.1	1.02	23	272.16	46	1	91.1258	0.133674	25	0.66436
8	8.67	175	908.6	911	909.8	2.4	1.6	32.1	1.02	23	272.16	46	1	91.1258	0.133674	25	0.4184
9	8.67	175	908.6	911	909.8	2.4	1.6	32.1	1.02	23	272.16	46	1	91.1258	0.133674	25	0.811402
10	8.67	175	908.6	911	909.8	2.4	1.6	32.1	1.02	23	272.16	46	1	91.1258	0.133674	25	0.65634
11	8.67	175	908.6	911	909.8	2.4	1.6	32.1	1.02	23	272.16	46	1	91.1258	0.133674	25	0.355573
12	8.67	175	908.6	911	909.8	2.4	1.6	32.1	1.02	23	272.16	46	1	91.1258	0.133674	25	0.581482
1	7.95	125	920.8	922.2	921.5	0.9	0.8	26.1	0.101	20	53.28	8.5	1	91.008	0.0407217	24.88	0.236186
2	7.95	125	920.8	922.2	921.5	0.9	0.8	26.1	0.101	20	53.28	8.5	1	91.008	0.0407217	24.88	0.535898
3	7.95	125	920.8	922.2	921.5	0.9	0.8	26.1	0.101	20	53.28	8.5	1	91.008	0.0407217	24.88	0.436537
4	7.95	125	920.8	922.2	921.5	0.9	0.8	26.1	0.101	20	53.28	8.5	1	91.008	0.0407217	24.88	0.378305
5	7.95	125	920.8	922.2	921.5	0.9	0.8	26.1	0.101	20	53.28	8.5	1	91.008	0.0407217	24.88	0.400294
6	7.95	125	920.8	922.2	921.5	0.9	0.8	26.1	0.101	20	53.28	8.5	1	91.008	0.0407217	24.88	0.423098
7	7.95	125	920.8	922.2	921.5	0.9	0.8	26.1	0.101	20	53.28	8.5	1	91.008	0.0407217	24.88	0.441423
8	7.95	125	920.8	922.2	921.5	0.9	0.8	26.1	0.101	20	53.28	8.5	1	91.008	0.0407217	24.88	0.329846
9	7.95	125	920.8	922.2	921.5	0.9	0.8	26.1	0.101	20	53.28	8.5	1	91.008	0.0407217	24.88	0.5078
10	7.95	125	920.8	922.2	921.5	0.9	0.8	26.1	0.101	20	53.28	8.5	1	91.008	0.0407217	24.88	0.530604
11	7.95	125	920.8	922.2	921.5	0.9	0.8	26.1	0.101	20	53.28	8.5	1	91.008	0.0407217	24.88	0.53264
12	7.95	125	920.8	922.2	921.5	0.9	0.8	26.1	0.101	20	53.28	8.5	1	91.008	0.0407217	24.88	0.485403
1	7.95	125	895.7	897.8	896.75	2.1	1.6	30.3	0.575	23	91	15	1	88.271	0.286729	24.95	0.295331
2	7.95	125	895.7	897.8	896.75	2.1	1.6	30.3	0.575	23	91	15	1	88.271	0.286729	24.95	0.877392
3	7.95	125	895.7	897.8	896.75	2.1	1.6	30.3	0.575	23	91	15	1	88.271	0.286729	24.95	0.573459
4	7.95	125	895.7	897.8	896.75	2.1	1.6	30.3	0.575	23	91	15	1	88.271	0.286729	24.95	2.58917
5	7.95	125	895.7	897.8	896.75	2.1	1.6	30.3	0.575	23	91	15	1	88.271	0.286729	24.95	2.5777
6	7.95	125	895.7	897.8	896.75	2.1	1.6	30.3	0.575	23	91	15	1	88.271	0.286729	24.95	1.83794
7	7.95	125	895.7	897.8	896.75	2.1	1.6	30.3	0.575	23	91	15	1	88.271	0.286729	24.95	1.47379
8	7.95	125	895.7	897.8	896.75	2.1	1.6	30.3	0.575	23	91	15	1	88.271	0.286729	24.95	1.05803
9	7.95	125	895.7	897.8	896.75	2.1	1.6	30.3	0.575	23	91	15	1	88.271	0.286729	24.95	0.874525
10	7.95	125	895.7	897.8	896.75	2.1	1.6	30.3	0.575	23	91	15	1	88.271	0.286729	24.95	0.883127
1	7.95	125	899.5	901.4	900.45	0.8	0.2	25.2	0.04	23	91	15	1	88.271	0.0024933	24.95	0.0025681
2	7.95	125	899.5	901.4	900.45	0.8	0.2	25.2	0.04	23	91	15	1	88.271	0.0024933	24.95	0.0076295
3	7.95	125	899.5	901.4	900.45	0.8	0.2	25.2	0.04	23	91	15	1	88.271	0.0024933	24.95	0.0049866
4	7.95	125	899.5	901.4	900.45	0.8	0.2	25.2	0.04	23	91	15	1	88.271	0.0024933	24.95	0.0225145
5	7.95	125	899.5	901.4	900.45	0.8	0.2	25.2	0.04	23	91	15	1	88.271	0.0024933	24.95	0.0224148
6	7.95	125	899.5	901.4	900.45	0.8	0.2	25.2	0.04	23	91	15	1	88.271	0.0024933	24.95	0.015982
7	7.95	125	899.5	901.4	900.45	0.8	0.2	25.2	0.04	23	91	15	1	88.271	0.0024933	24.95	0.0128156
8	7.95	125	899.5	901.4	900.45	0.8	0.2	25.2	0.04	23	91	15	1	88.271	0.0024933	24.95	0.00920027
9	7.95	125	899.5	901.4	900.45	0.8	0.2	25.2	0.04	23	91	15	1	88.271	0.0024933	24.95	0.00760456
10	7.95	125	899.5	901.4	900.45	0.8	0.2	25.2	0.04	23	91	15	1	88.271	0.0024933	24.95	0.00767936
1	7.95	125	896.8	898.6	897.7	1.8	0.9	32.3	0.644	19	82.32	13.5	1	89.5119	0.0855132	24.96	1.35025
2	7.95	125	896.8	898.6	897.7	1.8	0.9	32.3	0.644	19	82.32	13.5	1	89.5119	0.0855132	24.96	1.61962
3	7.95	125	896.8	898.6	897.7	1.8	0.9	32.3	0.644	19	82.32	13.5	1	89.5119	0.0855132	24.96	1.21258
4	7.95	125	896.8	898.6	897.7	1.8	0.9	32.3	0.644	19	82.32	13.5	1	89.5119	0.0855132	24.96	1.08858
5	7.95	125	896.8	898.6	897.7	1.8	0.9	32.3	0.644	19	82.32	13.5	1	89.5119	0.0855132	24.96	1.25362
6	7.95	125	896.8	898.6	897.7	1.8	0.9	32.3	0.644	19	82.32	13.5	1	89.5119	0.0855132	24.96	1.06892
7	7.95	125	896.8	898.6	897.7	1.8	0.9	32.3	0.644	19	82.32	13.5	1	89.5119	0.0855132	24.96	0.940645
8	7.95	125	896.8	898.6	897.7	1.8	0.9	32.3	0.644	19	82.32	13.5	1	89.5119	0.0855132	24.96	0.90815
9	7.95	125	896.8	898.6	897.7	1.8	0.9	32.3	0.644	19	82.32	13.5	1	89.5119	0.0855132	24.96	0.897889
10	7.95	125	896.8	898.6	897.7	1.8	0.9	32.3	0.644	19	82.32	13.5	1	89.5119	0.0855132	24.96	0.785866
11	7.95	125	896.8	898.6	897.7	1.8	0.9	32.3	0.644	19	82.32	13.5	1	89.5119	0.0855132	24.96	0.690947
12	7.95	125	896.8	898.6	897.7	1.8	0.9	32.3	0.644	19	82.32	13.5	1	89.5119	0.0855132	24.96	0.393361
1	7.95	125	900.6	902.3	901.45	1.7	0.9	32.6	0.677	20	91	15	1	89.5119	0.0898951	24.95	1.41944
2	7.95	125	900.6	902.3	901.45	1.7	0.9	32.6	0.677	20	91	15	1	89.5119	0.0898951	24.95	1.70261
3	7.95	125	900.6	902.3	901.45	1.7	0.9	32.6	0.677	20	91	15	1	89.5119	0.0898951	24.95	1.27471
4	7.95	125	900.6	902.3	901.45	1.7	0.9	32.6	0.677	20	91	15	1	89.5119	0.0898951	24.95	1.14436
5	7.95	125	900.6	902.3	901.45	1.7	0.9	32.6	0.677	20	91	15	1	89.5119	0.0898951	24.95	1.31786
6	7.95	125	900.6	902.3	901.45	1.7	0.9	32.6	0.677	20	91	15	1	89.5119	0.0898951	24.95	1.12369
7	7.95	125	900.6	902.3	901.45	1.7	0.9	32.6	0.677	20	91	15	1	89.5119	0.0898951	24.95	0.988846
8	7.95	125	900.6	902.3	901.45	1.7	0.9	32.6	0.677	20	91	15	1	89.5119	0.0898951	24.95	0.954686
9	7.95	125	900.6	902.3	901.45	1.7	0.9	32.6	0.677	20	91	15	1	89.5119	0.0898951	24.95	0.943899
10	7.95	125	900.6	902.3	901.45	1.7	0.9	32.6	0.677	20	91	15	1	89.5119	0.0898951	24.95	0.826136
11	7.95	125	900.6	902.3	901.45	1.7	0.9	32.6	0.677	20	91	15	1	89.5119	0.0898951	24.95	0.726352
12	7.95	125	900.6	902.3	901.45	1.7	0.9	32.6	0.677	20	91	15	1	89.5119	0.0898951	24.95	0.413517
1	7.95	125	855.2	857.3	856.25	1.7	0.6	25.4	0.083	19	70.28	11.5	1	87.5484	0.00714634	24.93	0.0546695
2	7.95	125	855.2	857.3	856.25	1.7	0.6	25.4	0.083	19	70.28	11.5	1	87.5484	0.00714634	24.93	0.0246549
3	7.95	125	855.2	857.3	856.25	1.7	0.6	25.4	0.083	19	70.28	11.5	1	87.5484	0.00714634	24.93	0.0101478
4	7.95	125	855.2	857.3	856.25	1.7	0.6	25.4	0.083	19	70.28	11.5	1	87.5484	0.00714634	24.93	0.00786098
1	7.95	125	860.2	861.8	861	1.6	0.7	26.5	0.201	23	70.28	11.5	1	84.1002	0.016961	24.93	0.0632645
2	7.95	125	860.2	861.8	861	1.6	0.7	26.5	0.201	23	70.28	11.5	1	84.1002	0.016961	24.93	0.0323955
3	7.95	125	860.2	861.8	861	1.6	0.7	26.5	0.201	23	70.28	11.5	1	84.1002	0.016961	24.93	0.043929
4	7.95	125	860.2	861.8	861	1.6	0.7	26.5	0.201	23	70.28	11.5	1	84.1002	0.016961	24.93	0.0851442
5	7.95	125	860.2	861.8	861	1.6	0.7	26.5	0.201	23	70.28	11.5	1	84.1002	0.016961	24.93	0.0768333
6	7.95	125	860.2	861.8	861	1.6	0.7	26.5	0.201	23	70.28	11.5	1	84.1002	0.016961	24.93	0.0245935
7	7.95	125	860.2	861.8	861	1.6	0.7	26.5	0.201	23	70.28	11.5	1	84.1002	0.016961	24.93	0.0111943
8	7.95	125	860.2	861.8	861	1.6	0.7	26.5	0.201	23	70.28	11.5	1	84.1002	0.016961	24.93	0.0313779
9	7.95	125	860.2	861.8	861	1.6	0.7	26.5	0.201	23	70.28	11.5	1	84.1002	0.016961	24.93	0.033074
10	7.95	125	860.2	861.8	861	1.6	0.7	26.5	0.201	23	70.28	11.5	1	84.1002	0.016961	24.93	0.0327347
11	7.95	125	860.2	861.8	861	1.6	0.7	26.5	0.201	23	70.28	11.5	1	84.1002	0.016961	24.93	0.0240846
12	7.95	125	860.2	861.8	861	1.6	0.7	26.5	0.201	23	70.28	11.5	1	84.1002	0.016961	24.93	0.00661479
1	7.92	125	812.7	815.5	814.1	2.8	1.6	30.2	0.515	23	61.32	8.5	1	0	0.449585	21	1.83431
2	7.92	125	812.7	815.5	814.1	2.8	1.6	30.2	0.515	23	61.32	8.5	1	0	0.449585	21	1.24985
3	7.92	125	812.7	815.5	814.1	2.8	1.6	30.2	0.515	23	61.32	8.5	1	0	0.449585	21	1.41619
4	7.92	125	812.7	815.5	814.1	2.8	1.6	30.2	0.515	23	61.32	8.5	1	0	0.449585	21	2.41877
5	7.92	125	812.7	815.5	814.1	2.8	1.6	30.2	0.515	23	61.32	8.5	1	0	0.449585	21	2.19398
6	7.92	125	812.7	815.5	814.1	2.8	1.6	30.2	0.515	23	61.32	8.5	1	0	0.449585	21	2.70201
7	7.92	125	812.7	815.5	814.1	2.8	1.6	30.2	0.515	23	61.32	8.5	1	0	0.449585	21	2.25242
8	7.92	125	812.7	815.5	814.1	2.8	1.6	30.2	0.515	23	61.32	8.5	1	0	0.449585	21	1.39821
9	7.92	125	812.7	815.5	814.1	2.8	1.6	30.2	0.515	23	61.32	8.5	1	0	0.449585	21	1.25434
10	7.92	125	812.7	815.5	814.1	2.8	1.6	30.2	0.515	23	61.32	8.5	1	0	0.449585	21	1.07001
11	7.92	125	812.7	815.5	814.1	2.8	1.6	30.2	0.515	23	61.32	8.5	1	0	0.449585	21	1.03405
12	7.92	125	812.7	815.5	814.1	2.8	1.6	30.2	0.515	23	61.32	8.5	1	0	0.449585	21	1.21388
1	7.92	125	817	819.2	818.1	2.2	1.3	30.5	0.571	21	61.32	8.5	1	0	0.405009	21	1.65244
2	7.92	125	817	819.2	818.1	2.2	1.3	30.5	0.571	21	61.32	8.5	1	0	0.405009	21	1.12592
3	7.92	125	817	819.2	818.1	2.2	1.3	30.5	0.571	21	61.32	8.5	1	0	0.405009	21	1.27578
4	7.92	125	817	819.2	818.1	2.2	1.3	30.5	0.571	21	61.32	8.5	1	0	0.405009	21	2.17895
5	7.92	125	817	819.2	818.1	2.2	1.3	30.5	0.571	21	61.32	8.5	1	0	0.405009	21	1.97644
6	7.92	125	817	819.2	818.1	2.2	1.3	30.5	0.571	21	61.32	8.5	1	0	0.405009	21	2.4341
7	7.92	125	817	819.2	818.1	2.2	1.3	30.5	0.571	21	61.32	8.5	1	0	0.405009	21	2.02909
8	7.92	125	817	819.2	818.1	2.2	1.3	30.5	0.571	21	61.32	8.5	1	0	0.405009	21	1.25958
9	7.92	125	817	819.2	818.1	2.2	1.3	30.5	0.571	21	61.32	8.5	1	0	0.405009	21	1.12997
10	7.92	125	817	819.2	818.1	2.2	1.3	30.5	0.571	21	61.32	8.5	1	0	0.405009	21	0.963921
11	7.92	125	817	819.2	818.1	2.2	1.3	30.5	0.571	21	61.32	8.5	1	0	0.405009	21	0.93152
12	7.92	125	817	819.2	818.1	2.2	1.3	30.5	0.571	21	61.32	8.5	1	0	0.405009	21	1.09352
1	10.18	125	1083	1084.2	1083.6	1.2	0.4	27.8	0.162	30	91.28	15	1	95.0753	0.00563723	25	0.00546812
2	10.18	125	1083	1084.2	1083.6	1.2	0.4	27.8	0.162	30	91.28	15	1	95.0753	0.00563723	25	0.00918869
3	10.18	125	1083	1084.2	1083.6	1.2	0.4	27.8	0.162	30	91.28	15	1	95.0753	0.00563723	25	0.0198431
4	10.18	125	1083	1084.2	1083.6	1.2	0.4	27.8	0.162	30	91.28	15	1	95.0753	0.00563723	25	0.0148259
5	10.18	125	1083	1084.2	1083.6	1.2	0.4	27.8	0.162	30	91.28	15	1	95.0753	0.00563723	25	0.011049
6	10.18	125	1083	1084.2	1083.6	1.2	0.4	27.8	0.162	30	91.28	15	1	95.0753	0.00563723	25	0.00789213
7	10.18	125	1083	1084.2	1083.6	1.2	0.4	27.8	0.162	30	91.28	15	1	95.0753	0.00563723	25	0.0100906
8	10.18	125	1083	1084.2	1083.6	1.2	0.4	27.8	0.162	30	91.28	15	1	95.0753	0.00563723	25	0.000563723
1	10.18	125	1093.4	1097.1	1095.25	3	1.2	31.7	0.567	28	53.48	8.5	1	95.0753	0.059191	24.9	0.0574152
2	10.18	125	1093.4	1097.1	1095.25	3	1.2	31.7	0.567	28	53.48	8.5	1	95.0753	0.059191	24.9	0.0964813
3	10.18	125	1093.4	1097.1	1095.25	3	1.2	31.7	0.567	28	53.48	8.5	1	95.0753	0.059191	24.9	0.208352
4	10.18	125	1093.4	1097.1	1095.25	3	1.2	31.7	0.567	28	53.48	8.5	1	95.0753	0.059191	24.9	0.155672
5	10.18	125	1093.4	1097.1	1095.25	3	1.2	31.7	0.567	28	53.48	8.5	1	95.0753	0.059191	24.9	0.116014
6	10.18	125	1093.4	1097.1	1095.25	3	1.2	31.7	0.567	28	53.48	8.5	1	95.0753	0.059191	24.9	0.0828673
7	10.18	125	1093.4	1097.1	1095.25	3	1.2	31.7	0.567	28	53.48	8.5	1	95.0753	0.059191	24.9	0.105952
8	10.18	125	1093.4	1097.1	1095.25	3	1.2	31.7	0.567	28	53.48	8.5	1	95.0753	0.059191	24.9	0.0059191
1	10.18	125	1141.7	1144.6	1143.15	2.9	0.8	28.3	0.205	29	91.56	15	1	95.0753	0.0142671	25	0.0138391
2	10.18	125	1141.7	1144.6	1143.15	2.9	0.8	28.3	0.205	29	91.56	15	1	95.0753	0.0142671	25	0.0232553
3	10.18	125	1141.7	1144.6	1143.15	2.9	0.8	28.3	0.205	29	91.56	15	1	95.0753	0.0142671	25	0.0502201
4	10.18	125	1141.7	1144.6	1143.15	2.9	0.8	28.3	0.205	29	91.56	15	1	95.0753	0.0142671	25	0.0375224
5	10.18	125	1141.7	1144.6	1143.15	2.9	0.8	28.3	0.205	29	91.56	15	1	95.0753	0.0142671	25	0.0279635
6	10.18	125	1141.7	1144.6	1143.15	2.9	0.8	28.3	0.205	29	91.56	15	1	95.0753	0.0142671	25	0.0199739
7	10.18	125	1141.7	1144.6	1143.15	2.9	0.8	28.3	0.205	29	91.56	15	1	95.0753	0.0142671	25	0.0255381
8	10.18	125	1141.7	1144.6	1143.15	2.9	0.8	28.3	0.205	29	91.56	15	1	95.0753	0.0142671	25	0.00142671
1	8.02	125	910.9	912.2	911.55	1.3	1.3	30.2	0.592	18	62.16	8.5	1	0	0.106972	20.85	0.321986
2	8.02	125	910.9	912.2	911.55	1.3	1.3	30.2	0.592	18	62.16	8.5	1	0	0.106972	20.85	0.646111
3	8.02	125	910.9	912.2	911.55	1.3	1.3	30.2	0.592	18	62.16	8.5	1	0	0.106972	20.85	0.901775
4	8.02	125	910.9	912.2	911.55	1.3	1.3	30.2	0.592	18	62.16	8.5	1	0	0.106972	20.85	0.730619
5	8.02	125	910.9	912.2	911.55	1.3	1.3	30.2	0.592	18	62.16	8.5	1	0	0.106972	20.85	0.860056
6	8.02	125	910.9	912.2	911.55	1.3	1.3	30.2	0.592	18	62.16	8.5	1	0	0.106972	20.85	0.558394
7	8.02	125	910.9	912.2	911.55	1.3	1.3	30.2	0.592	18	62.16	8.5	1	0	0.106972	20.85	0.242827
8	8.02	125	910.9	912.2	911.55	1.3	1.3	30.2	0.592	18	62.16	8.5	1	0	0.106972	20.85	0.188271
9	8.02	125	910.9	912.2	911.55	1.3	1.3	30.2	0.592	18	62.16	8.5	1	0	0.106972	20.85	0.283476
10	8.02	125	910.9	912.2	911.55	1.3	1.3	30.2	0.592	18	62.16	8.5	1	0	0.106972	20.85	0.244966
11	8.02	125	910.9	912.2	911.55	1.3	1.3	30.2	0.592	18	62.16	8.5	1	0	0.106972	20.85	0.301661
12	8.02	125	910.9	912.2	911.55	1.3	1.3	30.2	0.592	18	62.16	8.5	1	0	0.106972	20.85	0.395797
1	8.02	125	914.2	919.4	916.8	4	3.5	31.3	0.706	21	91	15	1	0	0.343462	24.95	1.03382
2	8.02	125	914.2	919.4	916.8	4	3.5	31.3	0.706	21	91	15	1	0	0.343462	24.95	2.07451
3	8.02	125	914.2	919.4	916.8	4	3.5	31.3	0.706	21	91	15	1	0	0.343462	24.95	2.89538
4	8.02	125	914.2	919.4	916.8	4	3.5	31.3	0.706	21	91	15	1	0	0.343462	24.95	2.34584
5	8.02	125	914.2	919.4	916.8	4	3.5	31.3	0.706	21	91	15	1	0	0.343462	24.95	2.76143
6	8.02	125	914.2	919.4	916.8	4	3.5	31.3	0.706	21	91	15	1	0	0.343462	24.95	1.79287
7	8.02	125	914.2	919.4	916.8	4	3.5	31.3	0.706	21	91	15	1	0	0.343462	24.95	0.779658
8	8.02	125	914.2	919.4	916.8	4	3.5	31.3	0.706	21	91	15	1	0	0.343462	24.95	0.604492
9	8.02	125	914.2	919.4	916.8	4	3.5	31.3	0.706	21	91	15	1	0	0.343462	24.95	0.910173
10	8.02	125	914.2	919.4	916.8	4	3.5	31.3	0.706	21	91	15	1	0	0.343462	24.95	0.786527
11	8.02	125	914.2	919.4	916.8	4	3.5	31.3	0.706	21	91	15	1	0	0.343462	24.95	0.968562
12	8.02	125	914.2	919.4	916.8	4	3.5	31.3	0.706	21	91	15	1	0	0.343462	24.95	1.27081
1	8.02	125	928.8	930.4	929.6	0.8	0.3	27.7	0.11	23	70.56	11.5	1	0	0.0045869	24.93	0.0138066
2	8.02	125	928.8	930.4	929.6	0.8	0.3	27.7	0.11	23	70.56	11.5	1	0	0.0045869	24.93	0.0277049
3	8.02	125	928.8	930.4	929.6	0.8	0.3	27.7	0.11	23	70.56	11.5	1	0	0.0045869	24.93	0.0386676
4	8.02	125	928.8	930.4	929.6	0.8	0.3	27.7	0.11	23	70.56	11.5	1	0	0.0045869	24.93	0.0313285
5	8.02	125	928.8	930.4	929.6	0.8	0.3	27.7	0.11	23	70.56	11.5	1	0	0.0045869	24.93	0.0368787
6	8.02	125	928.8	930.4	929.6	0.8	0.3	27.7	0.11	23	70.56	11.5	1	0	0.0045869	24.93	0.0239436
7	8.02	125	928.8	930.4	929.6	0.8	0.3	27.7	0.11	23	70.56	11.5	1	0	0.0045869	24.93	0.0104123
8	8.02	125	928.8	930.4	929.6	0.8	0.3	27.7	0.11	23	70.56	11.5	1	0	0.0045869	24.93	0.00807295
9	8.02	125	928.8	930.4	929.6	0.8	0.3	27.7	0.11	23	70.56	11.5	1	0	0.0045869	24.93	0.0121553
10	8.02	125	928.8	930.4	929.6	0.8	0.3	27.7	0.11	23	70.56	11.5	1	0	0.0045869	24.93	0.010504
11	8.02	125	928.8	930.4	929.6	0.8	0.3	27.7	0.11	23	70.56	11.5	1	0	0.0045869	24.93	0.0129351
12	8.02	125	928.8	930.4	929.6	0.8	0.3	27.7	0.11	23	70.56	11.5	1	0	0.0045869	24.93	0.0169715
1	7.37	175	920.4	924.2	922.3	3.8	1.4	28.6	0.17	23	169.96	28.5	1	93.4316	0.0832896	24.96	0.172409
2	7.37	175	920.4	924.2	922.3	3.8	1.4	28.6	0.17	23	169.96	28.5	1	93.4316	0.0832896	24.96	0.117438
3	7.37	175	920.4	924.2	922.3	3.8	1.4	28.6	0.17	23	169.96	28.5	1	93.4316	0.0832896	24.96	0.162415
4	7.37	175	920.4	924.2	922.3	3.8	1.4	28.6	0.17	23	169.96	28.5	1	93.4316	0.0832896	24.96	0.104112
5	7.37	175	920.4	924.2	922.3	3.8	1.4	28.6	0.17	23	169.96	28.5	1	93.4316	0.0832896	24.96	0.15242
6	7.37	175	920.4	924.2	922.3	3.8	1.4	28.6	0.17	23	169.96	28.5	1	93.4316	0.0832896	24.96	0.147423
7	7.37	175	920.4	924.2	922.3	3.8	1.4	28.6	0.17	23	169.96	28.5	1	93.4316	0.0832896	24.96	0.242373
8	7.37	175	920.4	924.2	922.3	3.8	1.4	28.6	0.17	23	169.96	28.5	1	93.4316	0.0832896	24.96	0.172409
9	7.37	175	920.4	924.2	922.3	3.8	1.4	28.6	0.17	23	169.96	28.5	1	93.4316	0.0832896	24.96	0.0624672
10	7.37	175	920.4	924.2	922.3	3.8	1.4	28.6	0.17	23	169.96	28.5	1	93.4316	0.0832896	24.96	0.121603
1	7.95	125	842.7	845.7	844.2	3	2.6	31.3	0.494	20	70	11.5	1	89.0529	0.332617	25.09	0.449033
2	7.95	125	842.7	845.7	844.2	3	2.6	31.3	0.494	20	70	11.5	1	89.0529	0.332617	25.09	0.276072
3	7.95	125	842.7	845.7	844.2	3	2.6	31.3	0.494	20	70	11.5	1	89.0529	0.332617	25.09	0.15633
1	7.95	125	856.4	859.2	857.8	2.5	1.9	30.5	0.39	21	70	11.5	1	89.0529	0.191894	25.09	0.259057
2	7.95	125	856.4	859.2	857.8	2.5	1.9	30.5	0.39	21	70	11.5	1	89.0529	0.191894	25.09	0.159272
3	7.95	125	856.4	859.2	857.8	2.5	1.9	30.5	0.39	21	70	11.5	1	89.0529	0.191894	25.09	0.0901903
1	11.27	125	1040	1044.2	1042.1	4.2	2.1	31.3	0.55	27	110.28	15	1	98.6628	0.610885	20.31	0.226027
2	11.27	125	1040	1044.2	1042.1	4.2	2.1	31.3	0.55	27	110.28	15	1	98.6628	0.610885	20.31	0.678082
3	11.27	125	1040	1044.2	1042.1	4.2	2.1	31.3	0.55	27	110.28	15	1	98.6628	0.610885	20.31	0.653647
4	11.27	125	1040	1044.2	1042.1	4.2	2.1	31.3	0.55	27	110.28	15	1	98.6628	0.610885	20.31	0.409293
5	11.27	125	1040	1044.2	1042.1	4.2	2.1	31.3	0.55	27	110.28	15	1	98.6628	0.610885	20.31	0.604776
6	11.27	125	1040	1044.2	1042.1	4.2	2.1	31.3	0.55	27	110.28	15	1	98.6628	0.610885	20.31	0.641429
7	11.27	125	1040	1044.2	1042.1	4.2	2.1	31.3	0.55	27	110.28	15	1	98.6628	0.610885	20.31	0.238245
8	11.27	125	1040	1044.2	1042.1	4.2	2.1	31.3	0.55	27	110.28	15	1	98.6628	0.610885	20.31	0.335987
9	11.27	125	1040	1044.2	1042.1	4.2	2.1	31.3	0.55	27	110.28	15	1	98.6628	0.610885	20.31	0.109959
10	11.27	125	1040	1044.2	1042.1	4.2	2.1	31.3	0.55	27	110.28	15	1	98.6628	0.610885	20.31	0.0488708
11	11.27	125	1040	1044.2	1042.1	4.2	2.1	31.3	0.55	27	110.28	15	1	98.6628	0.610885	20.31	0.0610885
1	11.27	125	1046	1047.7	1046.85	1.7	0.3	27.2	0.064	29	91.28	15	1	98.6628	0.010155	25.07	0.00375734
2	11.27	125	1046	1047.7	1046.85	1.7	0.3	27.2	0.064	29	91.28	15	1	98.6628	0.010155	25.07	0.011272
3	11.27	125	1046	1047.7	1046.85	1.7	0.3	27.2	0.064	29	91.28	15	1	98.6628	0.010155	25.07	0.0108658
4	11.27	125	1046	1047.7	1046.85	1.7	0.3	27.2	0.064	29	91.28	15	1	98.6628	0.010155	25.07	0.00680383
5	11.27	125	1046	1047.7	1046.85	1.7	0.3	27.2	0.064	29	91.28	15	1	98.6628	0.010155	25.07	0.0100534
6	11.27	125	1046	1047.7	1046.85	1.7	0.3	27.2	0.064	29	91.28	15	1	98.6628	0.010155	25.07	0.0106627
7	11.27	125	1046	1047.7	1046.85	1.7	0.3	27.2	0.064	29	91.28	15	1	98.6628	0.010155	25.07	0.00396044
8	11.27	125	1046	1047.7	1046.85	1.7	0.3	27.2	0.064	29	91.28	15	1	98.6628	0.010155	25.07	0.00558523
9	11.27	125	1046	1047.7	1046.85	1.7	0.3	27.2	0.064	29	91.28	15	1	98.6628	0.010155	25.07	0.00182789
10	11.27	125	1046	1047.7	1046.85	1.7	0.3	27.2	0.064	29	91.28	15	1	98.6628	0.010155	25.07	0.000812398
11	11.27	125	1046	1047.7	1046.85	1.7	0.3	27.2	0.064	29	91.28	15	1	98.6628	0.010155	25.07	0.0010155
1	11.27	125	1068.4	1069.8	1069.1	1.4	1.3	30.5	0.508	28	91.28	15	1	98.6628	0.349289	25.07	0.129237
2	11.27	125	1068.4	1069.8	1069.1	1.4	1.3	30.5	0.508	28	91.28	15	1	98.6628	0.349289	25.07	0.38771
3	11.27	125	1068.4	1069.8	1069.1	1.4	1.3	30.5	0.508	28	91.28	15	1	98.6628	0.349289	25.07	0.373739
4	11.27	125	1068.4	1069.8	1069.1	1.4	1.3	30.5	0.508	28	91.28	15	1	98.6628	0.349289	25.07	0.234023
5	11.27	125	1068.4	1069.8	1069.1	1.4	1.3	30.5	0.508	28	91.28	15	1	98.6628	0.349289	25.07	0.345796
6	11.27	125	1068.4	1069.8	1069.1	1.4	1.3	30.5	0.508	28	91.28	15	1	98.6628	0.349289	25.07	0.366753
7	11.27	125	1068.4	1069.8	1069.1	1.4	1.3	30.5	0.508	28	91.28	15	1	98.6628	0.349289	25.07	0.136223
8	11.27	125	1068.4	1069.8	1069.1	1.4	1.3	30.5	0.508	28	91.28	15	1	98.6628	0.349289	25.07	0.192109
9	11.27	125	1068.4	1069.8	1069.1	1.4	1.3	30.5	0.508	28	91.28	15	1	98.6628	0.349289	25.07	0.062872
10	11.27	125	1068.4	1069.8	1069.1	1.4	1.3	30.5	0.508	28	91.28	15	1	98.6628	0.349289	25.07	0.0279431
11	11.27	125	1068.4	1069.8	1069.1	1.4	1.3	30.5	0.508	28	91.28	15	1	98.6628	0.349289	25.07	0.0349289
1	8.02	125	891.5	894.9	893.2	3.4	1.6	30.7	0.565	24	90.72	15	1	0	0.178198	24.95	0.600528
2	8.02	125	891.5	894.9	893.2	3.4	1.6	30.7	0.565	24	90.72	15	1	0	0.178198	24.95	0.630822
3	8.02	125	891.5	894.9	893.2	3.4	1.6	30.7	0.565	24	90.72	15	1	0	0.178198	24.95	0.534595
4	8.02	125	891.5	894.9	893.2	3.4	1.6	30.7	0.565	24	90.72	15	1	0	0.178198	24.95	0.739523
5	8.02	125	891.5	894.9	893.2	3.4	1.6	30.7	0.565	24	90.72	15	1	0	0.178198	24.95	0.64686
6	8.02	125	891.5	894.9	893.2	3.4	1.6	30.7	0.565	24	90.72	15	1	0	0.178198	24.95	0.534595
7	8.02	125	891.5	894.9	893.2	3.4	1.6	30.7	0.565	24	90.72	15	1	0	0.178198	24.95	0.613002
8	8.02	125	891.5	894.9	893.2	3.4	1.6	30.7	0.565	24	90.72	15	1	0	0.178198	24.95	0.653988
9	8.02	125	891.5	894.9	893.2	3.4	1.6	30.7	0.565	24	90.72	15	1	0	0.178198	24.95	0.751997
1	8.02	125	904.8	906.4	905.6	1.6	1.6	31.3	0.576	24	91	15	1	0	0.181668	24.95	0.61222
2	8.02	125	904.8	906.4	905.6	1.6	1.6	31.3	0.576	24	91	15	1	0	0.181668	24.95	0.643103
3	8.02	125	904.8	906.4	905.6	1.6	1.6	31.3	0.576	24	91	15	1	0	0.181668	24.95	0.545003
4	8.02	125	904.8	906.4	905.6	1.6	1.6	31.3	0.576	24	91	15	1	0	0.181668	24.95	0.753921
5	8.02	125	904.8	906.4	905.6	1.6	1.6	31.3	0.576	24	91	15	1	0	0.181668	24.95	0.659454
6	8.02	125	904.8	906.4	905.6	1.6	1.6	31.3	0.576	24	91	15	1	0	0.181668	24.95	0.545003
7	8.02	125	904.8	906.4	905.6	1.6	1.6	31.3	0.576	24	91	15	1	0	0.181668	24.95	0.624937
8	8.02	125	904.8	906.4	905.6	1.6	1.6	31.3	0.576	24	91	15	1	0	0.181668	24.95	0.66672
9	8.02	125	904.8	906.4	905.6	1.6	1.6	31.3	0.576	24	91	15	1	0	0.181668	24.95	0.766637
1	10.94	175	913.4	915.3	914.35	1.9	1.4	29	0.85	26	140.84	23.5	1	0	0.1936	24.96	2.04054
2	10.94	175	913.4	915.3	914.35	1.9	1.4	29	0.85	26	140.84	23.5	1	0	0.1936	24.96	1.7211
3	10.94	175	913.4	915.3	914.35	1.9	1.4	29	0.85	26	140.84	23.5	1	0	0.1936	24.96	1.97278
4	10.94	175	913.4	915.3	914.35	1.9	1.4	29	0.85	26	140.84	23.5	1	0	0.1936	24.96	2.29222
5	10.94	175	913.4	915.3	914.35	1.9	1.4	29	0.85	26	140.84	23.5	1	0	0.1936	24.96	1.95342
6	10.94	175	913.4	915.3	914.35	1.9	1.4	29	0.85	26	140.84	23.5	1	0	0.1936	24.96	1.94761
7	10.94	175	913.4	915.3	914.35	1.9	1.4	29	0.85	26	140.84	23.5	1	0	0.1936	24.96	1.95342
8	10.94	175	913.4	915.3	914.35	1.9	1.4	29	0.85	26	140.84	23.5	1	0	0.1936	24.96	2.35611
9	10.94	175	913.4	915.3	914.35	1.9	1.4	29	0.85	26	140.84	23.5	1	0	0.1936	24.96	2.09281
10	10.94	175	913.4	915.3	914.35	1.9	1.4	29	0.85	26	140.84	23.5	1	0	0.1936	24.96	1.68238
11	10.94	175	913.4	915.3	914.35	1.9	1.4	29	0.85	26	140.84	23.5	1	0	0.1936	24.96	1.70561
12	10.94	175	913.4	915.3	914.35	1.9	1.4	29	0.85	26	140.84	23.5	1	0	0.1936	24.96	1.76563
1	10.94	175	923.4	925.7	924.55	2.3	0.8	30.7	0.434	26	140.84	23.5	1	0	0.0564856	24.96	0.595358
2	10.94	175	923.4	925.7	924.55	2.3	0.8	30.7	0.434	26	140.84	23.5	1	0	0.0564856	24.96	0.502157
3	10.94	175	923.4	925.7	924.55	2.3	0.8	30.7	0.434	26	140.84	23.5	1	0	0.0564856	24.96	0.575588
4	10.94	175	923.4	925.7	924.55	2.3	0.8	30.7	0.434	26	140.84	23.5	1	0	0.0564856	24.96	0.668789
5	10.94	175	923.4	925.7	924.55	2.3	0.8	30.7	0.434	26	140.84	23.5	1	0	0.0564856	24.96	0.56994
6	10.94	175	923.4	925.7	924.55	2.3	0.8	30.7	0.434	26	140.84	23.5	1	0	0.0564856	24.96	0.568245
7	10.94	175	923.4	925.7	924.55	2.3	0.8	30.7	0.434	26	140.84	23.5	1	0	0.0564856	24.96	0.56994
8	10.94	175	923.4	925.7	924.55	2.3	0.8	30.7	0.434	26	140.84	23.5	1	0	0.0564856	24.96	0.68743
9	10.94	175	923.4	925.7	924.55	2.3	0.8	30.7	0.434	26	140.84	23.5	1	0	0.0564856	24.96	0.610609
10	10.94	175	923.4	925.7	924.55	2.3	0.8	30.7	0.434	26	140.84	23.5	1	0	0.0564856	24.96	0.49086
11	10.94	175	923.4	925.7	924.55	2.3	0.8	30.7	0.434	26	140.84	23.5	1	0	0.0564856	24.96	0.497638
12	10.94	175	923.4	925.7	924.55	2.3	0.8	30.7	0.434	26	140.84	23.5	1	0	0.0564856	24.96	0.515149
1	7.95	125	878.2	881.2	879.7	3	2.3	30.4	0.454	28	70.28	11.5	1	97.6707	0.170176	24.93	0.461177
2	7.95	125	878.2	881.2	879.7	3	2.3	30.4	0.454	28	70.28	11.5	1	97.6707	0.170176	24.93	0.413528
3	7.95	125	878.2	881.2	879.7	3	2.3	30.4	0.454	28	70.28	11.5	1	97.6707	0.170176	24.93	0.5803
4	7.95	125	878.2	881.2	879.7	3	2.3	30.4	0.454	28	70.28	11.5	1	97.6707	0.170176	24.93	1.44309
5	7.95	125	878.2	881.2	879.7	3	2.3	30.4	0.454	28	70.28	11.5	1	97.6707	0.170176	24.93	2.0268
6	7.95	125	878.2	881.2	879.7	3	2.3	30.4	0.454	28	70.28	11.5	1	97.6707	0.170176	24.93	2.29567
7	7.95	125	878.2	881.2	879.7	3	2.3	30.4	0.454	28	70.28	11.5	1	97.6707	0.170176	24.93	2.29057
8	7.95	125	878.2	881.2	879.7	3	2.3	30.4	0.454	28	70.28	11.5	1	97.6707	0.170176	24.93	1.86343
9	7.95	125	878.2	881.2	879.7	3	2.3	30.4	0.454	28	70.28	11.5	1	97.6707	0.170176	24.93	1.81237
10	7.95	125	878.2	881.2	879.7	3	2.3	30.4	0.454	28	70.28	11.5	1	97.6707	0.170176	24.93	1.63709
11	7.95	125	878.2	881.2	879.7	3	2.3	30.4	0.454	28	70.28	11.5	1	97.6707	0.170176	24.93	1.39034
12	7.95	125	878.2	881.2	879.7	3	2.3	30.4	0.454	28	70.28	11.5	1	97.6707	0.170176	24.93	1.21506
1	8.02	125	899.2	899.6	899.4	0.4	0.4	27.9	0.287	0	67.96	9	1	86.1326	0.0315281	20.95	0.203356
2	8.02	125	899.2	899.6	899.4	0.4	0.4	27.9	0.287	0	67.96	9	1	86.1326	0.0315281	20.95	0.319064
3	8.02	125	899.2	899.6	899.4	0.4	0.4	27.9	0.287	0	67.96	9	1	86.1326	0.0315281	20.95	0.365726
4	8.02	125	899.2	899.6	899.4	0.4	0.4	27.9	0.287	0	67.96	9	1	86.1326	0.0315281	20.95	0.369509
5	8.02	125	899.2	899.6	899.4	0.4	0.4	27.9	0.287	0	67.96	9	1	86.1326	0.0315281	20.95	0.375499
6	8.02	125	899.2	899.6	899.4	0.4	0.4	27.9	0.287	0	67.96	9	1	86.1326	0.0315281	20.95	0.338296
7	8.02	125	899.2	899.6	899.4	0.4	0.4	27.9	0.287	0	67.96	9	1	86.1326	0.0315281	20.95	0.282491
8	8.02	125	899.2	899.6	899.4	0.4	0.4	27.9	0.287	0	67.96	9	1	86.1326	0.0315281	20.95	0.279969
9	8.02	125	899.2	899.6	899.4	0.4	0.4	27.9	0.287	0	67.96	9	1	86.1326	0.0315281	20.95	0.204932
10	8.02	125	899.2	899.6	899.4	0.4	0.4	27.9	0.287	0	67.96	9	1	86.1326	0.0315281	20.95	0.165838
11	8.02	125	899.2	899.6	899.4	0.4	0.4	27.9	0.287	0	67.96	9	1	86.1326	0.0315281	20.95	0.16899
12	8.02	125	899.2	899.6	899.4	0.4	0.4	27.9	0.287	0	67.96	9	1	86.1326	0.0315281	20.95	0.0993134
1	10.26	150	879.8	882.3	881.05	1.2	0.5	28.1	0.058	22	105	19	1	95.667	0.0177002	25	0.0449585
2	10.26	150	879.8	882.3	881.05	1.2	0.5	28.1	0.058	22	105	19	1	95.667	0.0177002	25	0.117706
3	10.26	150	879.8	882.3	881.05	1.2	0.5	28.1	0.058	22	105	19	1	95.667	0.0177002	25	0.198773
4	10.26	150	879.8	882.3	881.05	1.2	0.5	28.1	0.058	22	105	19	1	95.667	0.0177002	25	0.185675
5	10.26	150	879.8	882.3	881.05	1.2	0.5	28.1	0.058	22	105	19	1	95.667	0.0177002	25	0.0966431
6	10.26	150	879.8	882.3	881.05	1.2	0.5	28.1	0.058	22	105	19	1	95.667	0.0177002	25	0.146735
7	10.26	150	879.8	882.3	881.05	1.2	0.5	28.1	0.058	22	105	19	1	95.667	0.0177002	25	0.140363
8	10.26	150	879.8	882.3	881.05	1.2	0.5	28.1	0.058	22	105	19	1	95.667	0.0177002	25	0.142841
9	10.26	150	879.8	882.3	881.05	1.2	0.5	28.1	0.058	22	105	19	1	95.667	0.0177002	25	0.133636
10	10.26	150	879.8	882.3	881.05	1.2	0.5	28.1	0.058	22	105	19	1	95.667	0.0177002	25	0.101422
11	10.26	150	879.8	882.3	881.05	1.2	0.5	28.1	0.058	22	105	19	1	95.667	0.0177002	25	0.0971741
12	10.26	150	879.8	882.3	881.05	1.2	0.5	28.1	0.058	22	105	19	1	95.667	0.0177002	25	0.09505
1	10.26	150	886.3	887.2	886.75	0.9	0.8	29.7	0.315	21	105	19	1	95.667	0.153809	25	0.390674
2	10.26	150	886.3	887.2	886.75	0.9	0.8	29.7	0.315	21	105	19	1	95.667	0.153809	25	1.02283
3	10.26	150	886.3	887.2	886.75	0.9	0.8	29.7	0.315	21	105	19	1	95.667	0.153809	25	1.72727
4	10.26	150	886.3	887.2	886.75	0.9	0.8	29.7	0.315	21	105	19	1	95.667	0.153809	25	1.61345
5	10.26	150	886.3	887.2	886.75	0.9	0.8	29.7	0.315	21	105	19	1	95.667	0.153809	25	0.839795
6	10.26	150	886.3	887.2	886.75	0.9	0.8	29.7	0.315	21	105	19	1	95.667	0.153809	25	1.27507
7	10.26	150	886.3	887.2	886.75	0.9	0.8	29.7	0.315	21	105	19	1	95.667	0.153809	25	1.2197
8	10.26	150	886.3	887.2	886.75	0.9	0.8	29.7	0.315	21	105	19	1	95.667	0.153809	25	1.24124
9	10.26	150	886.3	887.2	886.75	0.9	0.8	29.7	0.315	21	105	19	1	95.667	0.153809	25	1.16125
10	10.26	150	886.3	887.2	886.75	0.9	0.8	29.7	0.315	21	105	19	1	95.667	0.153809	25	0.881323
11	10.26	150	886.3	887.2	886.75	0.9	0.8	29.7	0.315	21	105	19	1	95.667	0.153809	25	0.844409
12	10.26	150	886.3	887.2	886.75	0.9	0.8	29.7	0.315	21	105	19	1	95.667	0.153809	25	0.825952
1	10.26	150	899.3	903.2	901.25	3.9	1.1	29.5	0.248	19	65	11.5	1	95.667	0.166504	24.9	0.42292
2	10.26	150	899.3	903.2	901.25	3.9	1.1	29.5	0.248	19	65	11.5	1	95.667	0.166504	24.9	1.10725
3	10.26	150	899.3	903.2	901.25	3.9	1.1	29.5	0.248	19	65	11.5	1	95.667	0.166504	24.9	1.86984
4	10.26	150	899.3	903.2	901.25	3.9	1.1	29.5	0.248	19	65	11.5	1	95.667	0.166504	24.9	1.74663
5	10.26	150	899.3	903.2	901.25	3.9	1.1	29.5	0.248	19	65	11.5	1	95.667	0.166504	24.9	0.909111
6	10.26	150	899.3	903.2	901.25	3.9	1.1	29.5	0.248	19	65	11.5	1	95.667	0.166504	24.9	1.38032
7	10.26	150	899.3	903.2	901.25	3.9	1.1	29.5	0.248	19	65	11.5	1	95.667	0.166504	24.9	1.32038
8	10.26	150	899.3	903.2	901.25	3.9	1.1	29.5	0.248	19	65	11.5	1	95.667	0.166504	24.9	1.34369
9	10.26	150	899.3	903.2	901.25	3.9	1.1	29.5	0.248	19	65	11.5	1	95.667	0.166504	24.9	1.2571
10	10.26	150	899.3	903.2	901.25	3.9	1.1	29.5	0.248	19	65	11.5	1	95.667	0.166504	24.9	0.954067
11	10.26	150	899.3	903.2	901.25	3.9	1.1	29.5	0.248	19	65	11.5	1	95.667	0.166504	24.9	0.914106
12	10.26	150	899.3	903.2	901.25	3.9	1.1	29.5	0.248	19	65	11.5	1	95.667	0.166504	24.9	0.894126
1	9.5	175	964.9	969.8	967.35	4.9	3.9	30.6	0.859	21	91.28	15	1	91.4105	0.545281	24.95	2.04481
2	9.5	175	964.9	969.8	967.35	4.9	3.9	30.6	0.859	21	91.28	15	1	91.4105	0.545281	24.95	1.9303
3	9.5	175	964.9	969.8	967.35	4.9	3.9	30.6	0.859	21	91.28	15	1	91.4105	0.545281	24.95	2.31199
4	9.5	175	964.9	969.8	967.35	4.9	3.9	30.6	0.859	21	91.28	15	1	91.4105	0.545281	24.95	3.46254
5	9.5	175	964.9	969.8	967.35	4.9	3.9	30.6	0.859	21	91.28	15	1	91.4105	0.545281	24.95	3.40801
6	9.5	175	964.9	969.8	967.35	4.9	3.9	30.6	0.859	21	91.28	15	1	91.4105	0.545281	24.95	2.04481
7	9.5	175	964.9	969.8	967.35	4.9	3.9	30.6	0.859	21	91.28	15	1	91.4105	0.545281	24.95	2.16477
8	9.5	175	964.9	969.8	967.35	4.9	3.9	30.6	0.859	21	91.28	15	1	91.4105	0.545281	24.95	1.21052
9	9.5	175	964.9	969.8	967.35	4.9	3.9	30.6	0.859	21	91.28	15	1	91.4105	0.545281	24.95	0.763394
1	9.5	175	983.5	987.2	985.35	3.7	2.3	30.6	0.859	20	114.8	19	1	91.4105	0.321576	24.9	1.20591
2	9.5	175	983.5	987.2	985.35	3.7	2.3	30.6	0.859	20	114.8	19	1	91.4105	0.321576	24.9	1.13838
3	9.5	175	983.5	987.2	985.35	3.7	2.3	30.6	0.859	20	114.8	19	1	91.4105	0.321576	24.9	1.36348
4	9.5	175	983.5	987.2	985.35	3.7	2.3	30.6	0.859	20	114.8	19	1	91.4105	0.321576	24.9	2.04201
5	9.5	175	983.5	987.2	985.35	3.7	2.3	30.6	0.859	20	114.8	19	1	91.4105	0.321576	24.9	2.00985
6	9.5	175	983.5	987.2	985.35	3.7	2.3	30.6	0.859	20	114.8	19	1	91.4105	0.321576	24.9	1.20591
7	9.5	175	983.5	987.2	985.35	3.7	2.3	30.6	0.859	20	114.8	19	1	91.4105	0.321576	24.9	1.27666
8	9.5	175	983.5	987.2	985.35	3.7	2.3	30.6	0.859	20	114.8	19	1	91.4105	0.321576	24.9	0.713899
9	9.5	175	983.5	987.2	985.35	3.7	2.3	30.6	0.859	20	114.8	19	1	91.4105	0.321576	24.9	0.450207
1	10.26	150	848.4	851.3	849.85	2.9	2.3	31.4	0.724	21	70.08	11.5	1	92.5532	0.575556	27.17	1.54825
2	10.26	150	848.4	851.3	849.85	2.9	2.3	31.4	0.724	21	70.08	11.5	1	92.5532	0.575556	27.17	0.76549
3	10.26	150	848.4	851.3	849.85	2.9	2.3	31.4	0.724	21	70.08	11.5	1	92.5532	0.575556	27.17	1.036
4	10.26	150	848.4	851.3	849.85	2.9	2.3	31.4	0.724	21	70.08	11.5	1	92.5532	0.575556	27.17	2.66483
5	10.26	150	848.4	851.3	849.85	2.9	2.3	31.4	0.724	21	70.08	11.5	1	92.5532	0.575556	27.17	1.5022
6	10.26	150	848.4	851.3	849.85	2.9	2.3	31.4	0.724	21	70.08	11.5	1	92.5532	0.575556	27.17	1.45616
7	10.26	150	848.4	851.3	849.85	2.9	2.3	31.4	0.724	21	70.08	11.5	1	92.5532	0.575556	27.17	1.17414
8	10.26	150	848.4	851.3	849.85	2.9	2.3	31.4	0.724	21	70.08	11.5	1	92.5532	0.575556	27.17	1.63458
9	10.26	150	848.4	851.3	849.85	2.9	2.3	31.4	0.724	21	70.08	11.5	1	92.5532	0.575556	27.17	2.16985
10	10.26	150	848.4	851.3	849.85	2.9	2.3	31.4	0.724	21	70.08	11.5	1	92.5532	0.575556	27.17	1.97991
11	10.26	150	848.4	851.3	849.85	2.9	2.3	31.4	0.724	21	70.08	11.5	1	92.5532	0.575556	27.17	2.21014
12	10.26	150	848.4	851.3	849.85	2.9	2.3	31.4	0.724	21	70.08	11.5	1	92.5532	0.575556	27.17	3.14829
1	10.26	150	858.3	859.2	858.75	0.9	0.2	27.4	0.138	25	70.2	11.5	1	92.5532	0.00953961	24.16	0.0256616
2	10.26	150	858.3	859.2	858.75	0.9	0.2	27.4	0.138	25	70.2	11.5	1	92.5532	0.00953961	24.16	0.0126877
3	10.26	150	858.3	859.2	858.75	0.9	0.2	27.4	0.138	25	70.2	11.5	1	92.5532	0.00953961	24.16	0.0171713
4	10.26	150	858.3	859.2	858.75	0.9	0.2	27.4	0.138	25	70.2	11.5	1	92.5532	0.00953961	24.16	0.0441684
5	10.26	150	858.3	859.2	858.75	0.9	0.2	27.4	0.138	25	70.2	11.5	1	92.5532	0.00953961	24.16	0.0248984
6	10.26	150	858.3	859.2	858.75	0.9	0.2	27.4	0.138	25	70.2	11.5	1	92.5532	0.00953961	24.16	0.0241352
7	10.26	150	858.3	859.2	858.75	0.9	0.2	27.4	0.138	25	70.2	11.5	1	92.5532	0.00953961	24.16	0.0194608
8	10.26	150	858.3	859.2	858.75	0.9	0.2	27.4	0.138	25	70.2	11.5	1	92.5532	0.00953961	24.16	0.0270925
9	10.26	150	858.3	859.2	858.75	0.9	0.2	27.4	0.138	25	70.2	11.5	1	92.5532	0.00953961	24.16	0.0359643
10	10.26	150	858.3	859.2	858.75	0.9	0.2	27.4	0.138	25	70.2	11.5	1	92.5532	0.00953961	24.16	0.0328163
11	10.26	150	858.3	859.2	858.75	0.9	0.2	27.4	0.138	25	70.2	11.5	1	92.5532	0.00953961	24.16	0.0366321
12	10.26	150	858.3	859.2	858.75	0.9	0.2	27.4	0.138	25	70.2	11.5	1	92.5532	0.00953961	24.16	0.0521817
1	10.26	150	862.2	864.9	863.55	2.7	1.8	30.4	0.655	20	89.88	15	1	92.5532	0.407507	25.54	1.09619
2	10.26	150	862.2	864.9	863.55	2.7	1.8	30.4	0.655	20	89.88	15	1	92.5532	0.407507	25.54	0.541985
3	10.26	150	862.2	864.9	863.55	2.7	1.8	30.4	0.655	20	89.88	15	1	92.5532	0.407507	25.54	0.733513
4	10.26	150	862.2	864.9	863.55	2.7	1.8	30.4	0.655	20	89.88	15	1	92.5532	0.407507	25.54	1.88676
5	10.26	150	862.2	864.9	863.55	2.7	1.8	30.4	0.655	20	89.88	15	1	92.5532	0.407507	25.54	1.06359
6	10.26	150	862.2	864.9	863.55	2.7	1.8	30.4	0.655	20	89.88	15	1	92.5532	0.407507	25.54	1.03099
7	10.26	150	862.2	864.9	863.55	2.7	1.8	30.4	0.655	20	89.88	15	1	92.5532	0.407507	25.54	0.831315
8	10.26	150	862.2	864.9	863.55	2.7	1.8	30.4	0.655	20	89.88	15	1	92.5532	0.407507	25.54	1.15732
9	10.26	150	862.2	864.9	863.55	2.7	1.8	30.4	0.655	20	89.88	15	1	92.5532	0.407507	25.54	1.5363
10	10.26	150	862.2	864.9	863.55	2.7	1.8	30.4	0.655	20	89.88	15	1	92.5532	0.407507	25.54	1.40182
11	10.26	150	862.2	864.9	863.55	2.7	1.8	30.4	0.655	20	89.88	15	1	92.5532	0.407507	25.54	1.56483
12	10.26	150	862.2	864.9	863.55	2.7	1.8	30.4	0.655	20	89.88	15	1	92.5532	0.407507	25.54	2.22906
1	11.49	125	1141.7	1149	1145.35	7.3	5.2	29.3	0.522	35	130	23.5	1	80.6818	1	25	4.35
2	11.49	125	1141.7	1149	1145.35	7.3	5.2	29.3	0.522	35	130	23.5	1	80.6818	1	25	3.36
3	11.49	125	1141.7	1149	1145.35	7.3	5.2	29.3	0.522	35	130	23.5	1	80.6818	1	25	2.42
4	11.49	125	1141.7	1149	1145.35	7.3	5.2	29.3	0.522	35	130	23.5	1	80.6818	1	25	2.17
5	11.49	125	1141.7	1149	1145.35	7.3	5.2	29.3	0.522	35	130	23.5	1	80.6818	1	25	1.91
6	11.49	125	1141.7	1149	1145.35	7.3	5.2	29.3	0.522	35	130	23.5	1	80.6818	1	25	0.86
7	11.49	125	1141.7	1149	1145.35	7.3	5.2	29.3	0.522	35	130	23.5	1	80.6818	1	25	0.6
8	11.49	125	1141.7	1149	1145.35	7.3	5.2	29.3	0.522	35	130	23.5	1	80.6818	1	25	0.22
9	11.49	125	1141.7	1149	1145.35	7.3	5.2	29.3	0.522	35	130	23.5	1	80.6818	1	25	0.1
1	10.62	175	1004.2	1006.8	1005.5	2.6	1	28.5	0.347	27	141.12	23.5	1	95.7232	0.0718263	24.96	0.371342
2	10.62	175	1004.2	1006.8	1005.5	2.6	1	28.5	0.347	27	141.12	23.5	1	95.7232	0.0718263	24.96	0.170228
3	10.62	175	1004.2	1006.8	1005.5	2.6	1	28.5	0.347	27	141.12	23.5	1	95.7232	0.0718263	24.96	0.100557
4	10.62	175	1004.2	1006.8	1005.5	2.6	1	28.5	0.347	27	141.12	23.5	1	95.7232	0.0718263	24.96	0.105585
5	10.62	175	1004.2	1006.8	1005.5	2.6	1	28.5	0.347	27	141.12	23.5	1	95.7232	0.0718263	24.96	0.081882
6	10.62	175	1004.2	1006.8	1005.5	2.6	1	28.5	0.347	27	141.12	23.5	1	95.7232	0.0718263	24.96	0.054588
7	10.62	175	1004.2	1006.8	1005.5	2.6	1	28.5	0.347	27	141.12	23.5	1	95.7232	0.0718263	24.96	0.0445323
8	10.62	175	1004.2	1006.8	1005.5	2.6	1	28.5	0.347	27	141.12	23.5	1	95.7232	0.0718263	24.96	0.0395045
9	10.62	175	1004.2	1006.8	1005.5	2.6	1	28.5	0.347	27	141.12	23.5	1	95.7232	0.0718263	24.96	0.0459688
10	10.62	175	1004.2	1006.8	1005.5	2.6	1	28.5	0.347	27	141.12	23.5	1	95.7232	0.0718263	24.96	0.0344766
11	10.62	175	1004.2	1006.8	1005.5	2.6	1	28.5	0.347	27	141.12	23.5	1	95.7232	0.0718263	24.96	0.0229844
12	10.62	175	1004.2	1006.8	1005.5	2.6	1	28.5	0.347	27	141.12	23.5	1	95.7232	0.0718263	24.96	0.027294
1	10.62	175	1030	1034.8	1032.4	4.8	3.7	31.6	0.531	25	141.12	23.5	1	95.7232	0.406678	24.96	2.10252
2	10.62	175	1030	1034.8	1032.4	4.8	3.7	31.6	0.531	25	141.12	23.5	1	95.7232	0.406678	24.96	0.963826
3	10.62	175	1030	1034.8	1032.4	4.8	3.7	31.6	0.531	25	141.12	23.5	1	95.7232	0.406678	24.96	0.569349
4	10.62	175	1030	1034.8	1032.4	4.8	3.7	31.6	0.531	25	141.12	23.5	1	95.7232	0.406678	24.96	0.597816
5	10.62	175	1030	1034.8	1032.4	4.8	3.7	31.6	0.531	25	141.12	23.5	1	95.7232	0.406678	24.96	0.463612
6	10.62	175	1030	1034.8	1032.4	4.8	3.7	31.6	0.531	25	141.12	23.5	1	95.7232	0.406678	24.96	0.309075
7	10.62	175	1030	1034.8	1032.4	4.8	3.7	31.6	0.531	25	141.12	23.5	1	95.7232	0.406678	24.96	0.25214
8	10.62	175	1030	1034.8	1032.4	4.8	3.7	31.6	0.531	25	141.12	23.5	1	95.7232	0.406678	24.96	0.223673
9	10.62	175	1030	1034.8	1032.4	4.8	3.7	31.6	0.531	25	141.12	23.5	1	95.7232	0.406678	24.96	0.260274
10	10.62	175	1030	1034.8	1032.4	4.8	3.7	31.6	0.531	25	141.12	23.5	1	95.7232	0.406678	24.96	0.195205
11	10.62	175	1030	1034.8	1032.4	4.8	3.7	31.6	0.531	25	141.12	23.5	1	95.7232	0.406678	24.96	0.130137
12	10.62	175	1030	1034.8	1032.4	4.8	3.7	31.6	0.531	25	141.12	23.5	1	95.7232	0.406678	24.96	0.154537
1	8.02	125	866.7	867.8	867.25	1.1	0.3	27.2	0.064	35	90.72	15	1	85.3921	0.00172456	24.95	0.0216432
2	8.02	125	866.7	867.8	867.25	1.1	0.3	27.2	0.064	35	90.72	15	1	85.3921	0.00172456	24.95	0.0175042
3	8.02	125	866.7	867.8	867.25	1.1	0.3	27.2	0.064	35	90.72	15	1	85.3921	0.00172456	24.95	0.0220053
4	8.02	125	866.7	867.8	867.25	1.1	0.3	27.2	0.064	35	90.72	15	1	85.3921	0.00172456	24.95	0.0199186
5	8.02	125	866.7	867.8	867.25	1.1	0.3	27.2	0.064	35	90.72	15	1	85.3921	0.00172456	24.95	0.0156935
6	8.02	125	866.7	867.8	867.25	1.1	0.3	27.2	0.064	35	90.72	15	1	85.3921	0.00172456	24.95	0.011727
7	8.02	125	866.7	867.8	867.25	1.1	0.3	27.2	0.064	35	90.72	15	1	85.3921	0.00172456	24.95	0.00989895
8	8.02	125	866.7	867.8	867.25	1.1	0.3	27.2	0.064	35	90.72	15	1	85.3921	0.00172456	24.95	0.00872625
9	8.02	125	866.7	867.8	867.25	1.1	0.3	27.2	0.064	35	90.72	15	1	85.3921	0.00172456	24.95	0.00812266
1	7.95	125	818.9	820.3	819.6	0.9	0.6	28.7	0.313	21	56.4	8.5	1	91.6837	0.0529372	25	0.26151
2	7.95	125	818.9	820.3	819.6	0.9	0.6	28.7	0.313	21	56.4	8.5	1	91.6837	0.0529372	25	0.218101
3	7.95	125	818.9	820.3	819.6	0.9	0.6	28.7	0.313	21	56.4	8.5	1	91.6837	0.0529372	25	0.214925
4	7.95	125	818.9	820.3	819.6	0.9	0.6	28.7	0.313	21	56.4	8.5	1	91.6837	0.0529372	25	0.287449
5	7.95	125	818.9	820.3	819.6	0.9	0.6	28.7	0.313	21	56.4	8.5	1	91.6837	0.0529372	25	0.433556
6	7.95	125	818.9	820.3	819.6	0.9	0.6	28.7	0.313	21	56.4	8.5	1	91.6837	0.0529372	25	0.47167
7	7.95	125	818.9	820.3	819.6	0.9	0.6	28.7	0.313	21	56.4	8.5	1	91.6837	0.0529372	25	0.611954
8	7.95	125	818.9	820.3	819.6	0.9	0.6	28.7	0.313	21	56.4	8.5	1	91.6837	0.0529372	25	0.464259
9	7.95	125	818.9	820.3	819.6	0.9	0.6	28.7	0.313	21	56.4	8.5	1	91.6837	0.0529372	25	0.275273
1	7.95	125	832	834.3	833.15	2.3	2	31.5	0.665	18	71.28	11.5	1	91.6837	0.374901	25	1.85201
2	7.95	125	832	834.3	833.15	2.3	2	31.5	0.665	18	71.28	11.5	1	91.6837	0.374901	25	1.54459
3	7.95	125	832	834.3	833.15	2.3	2	31.5	0.665	18	71.28	11.5	1	91.6837	0.374901	25	1.5221
4	7.95	125	832	834.3	833.15	2.3	2	31.5	0.665	18	71.28	11.5	1	91.6837	0.374901	25	2.03571
5	7.95	125	832	834.3	833.15	2.3	2	31.5	0.665	18	71.28	11.5	1	91.6837	0.374901	25	3.07044
6	7.95	125	832	834.3	833.15	2.3	2	31.5	0.665	18	71.28	11.5	1	91.6837	0.374901	25	3.34037
7	7.95	125	832	834.3	833.15	2.3	2	31.5	0.665	18	71.28	11.5	1	91.6837	0.374901	25	4.33386
8	7.95	125	832	834.3	833.15	2.3	2	31.5	0.665	18	71.28	11.5	1	91.6837	0.374901	25	3.28788
9	7.95	125	832	834.3	833.15	2.3	2	31.5	0.665	18	71.28	11.5	1	91.6837	0.374901	25	1.94949
1	7.95	125	836	840.7	838.35	4	2.8	30.4	0.502	19	72.52	11.5	1	91.6837	0.396212	25	1.95728
2	7.95	125	836	840.7	838.35	4	2.8	30.4	0.502	19	72.52	11.5	1	91.6837	0.396212	25	1.63239
3	7.95	125	836	840.7	838.35	4	2.8	30.4	0.502	19	72.52	11.5	1	91.6837	0.396212	25	1.60862
4	7.95	125	836	840.7	838.35	4	2.8	30.4	0.502	19	72.52	11.5	1	91.6837	0.396212	25	2.15143
5	7.95	125	836	840.7	838.35	4	2.8	30.4	0.502	19	72.52	11.5	1	91.6837	0.396212	25	3.24497
6	7.95	125	836	840.7	838.35	4	2.8	30.4	0.502	19	72.52	11.5	1	91.6837	0.396212	25	3.53024
7	7.95	125	836	840.7	838.35	4	2.8	30.4	0.502	19	72.52	11.5	1	91.6837	0.396212	25	4.58021
8	7.95	125	836	840.7	838.35	4	2.8	30.4	0.502	19	72.52	11.5	1	91.6837	0.396212	25	3.47478
9	7.95	125	836	840.7	838.35	4	2.8	30.4	0.502	19	72.52	11.5	1	91.6837	0.396212	25	2.0603
1	8.29	125	871.5	875.1	873.3	3.4	2	30.4	0.595	20	70.28	11.5	1	81.9194	0.277034	24.93	0.933605
2	8.29	125	871.5	875.1	873.3	3.4	2	30.4	0.595	20	70.28	11.5	1	81.9194	0.277034	24.93	0.592853
3	8.29	125	871.5	875.1	873.3	3.4	2	30.4	0.595	20	70.28	11.5	1	81.9194	0.277034	24.93	0.839413
4	8.29	125	871.5	875.1	873.3	3.4	2	30.4	0.595	20	70.28	11.5	1	81.9194	0.277034	24.93	0.285345
1	8.29	125	887.6	888.6	888.1	1	0.5	26.1	0.09	30	81.76	13.5	1	81.9194	0.0104761	25.09	0.0353044
2	8.29	125	887.6	888.6	888.1	1	0.5	26.1	0.09	30	81.76	13.5	1	81.9194	0.0104761	25.09	0.0224188
3	8.29	125	887.6	888.6	888.1	1	0.5	26.1	0.09	30	81.76	13.5	1	81.9194	0.0104761	25.09	0.0317425
4	8.29	125	887.6	888.6	888.1	1	0.5	26.1	0.09	30	81.76	13.5	1	81.9194	0.0104761	25.09	0.0107904
1	11.49	125	1136.3	1137.5	1136.9	1.2	0.2	26.9	0.102	26	71.76	11.5	1	85.3155	0.0103108	24.9	0.000309325
2	11.49	125	1136.3	1137.5	1136.9	1.2	0.2	26.9	0.102	26	71.76	11.5	1	85.3155	0.0103108	24.9	0.00268082
3	11.49	125	1136.3	1137.5	1136.9	1.2	0.2	26.9	0.102	26	71.76	11.5	1	85.3155	0.0103108	24.9	0.00061865
1	11.49	125	1191.8	1198.7	1195.25	6.9	4.1	30.5	0.467	29	72	11.5	1	85.3155	0.967753	24.9	0.0290326
2	11.49	125	1191.8	1198.7	1195.25	6.9	4.1	30.5	0.467	29	72	11.5	1	85.3155	0.967753	24.9	0.251616
3	11.49	125	1191.8	1198.7	1195.25	6.9	4.1	30.5	0.467	29	72	11.5	1	85.3155	0.967753	24.9	0.0580652
1	8.08	125	860.2	862.2	861.2	2	1.5	30.5	0.642	25	50	8.5	1	94.3833	0.222535	25	0.569691
2	8.08	125	860.2	862.2	861.2	2	1.5	30.5	0.642	25	50	8.5	1	94.3833	0.222535	25	0.438395
3	8.08	125	860.2	862.2	861.2	2	1.5	30.5	0.642	25	50	8.5	1	94.3833	0.222535	25	0.462874
4	8.08	125	860.2	862.2	861.2	2	1.5	30.5	0.642	25	50	8.5	1	94.3833	0.222535	25	0.320451
5	8.08	125	860.2	862.2	861.2	2	1.5	30.5	0.642	25	50	8.5	1	94.3833	0.222535	25	0.329352
6	8.08	125	860.2	862.2	861.2	2	1.5	30.5	0.642	25	50	8.5	1	94.3833	0.222535	25	0.0534085
1	10.26	150	856.7	857.2	856.95	0.5	0.3	28.5	0.084	22	50	8.5	1	93.4483	0.00558622	25	0.0140214
2	10.26	150	856.7	857.2	856.95	0.5	0.3	28.5	0.084	22	50	8.5	1	93.4483	0.00558622	25	0.00575381
3	10.26	150	856.7	857.2	856.95	0.5	0.3	28.5	0.084	22	50	8.5	1	93.4483	0.00558622	25	0.00256966
4	10.26	150	856.7	857.2	856.95	0.5	0.3	28.5	0.084	22	50	8.5	1	93.4483	0.00558622	25	0.00396622
5	10.26	150	856.7	857.2	856.95	0.5	0.3	28.5	0.084	22	50	8.5	1	93.4483	0.00558622	25	0.00312828
6	10.26	150	856.7	857.2	856.95	0.5	0.3	28.5	0.084	22	50	8.5	1	93.4483	0.00558622	25	0.00245794
7	10.26	150	856.7	857.2	856.95	0.5	0.3	28.5	0.084	22	50	8.5	1	93.4483	0.00558622	25	0.00430139
8	10.26	150	856.7	857.2	856.95	0.5	0.3	28.5	0.084	22	50	8.5	1	93.4483	0.00558622	25	0.00452484
9	10.26	150	856.7	857.2	856.95	0.5	0.3	28.5	0.084	22	50	8.5	1	93.4483	0.00558622	25	0.00508346
1	10.26	150	858.8	859.7	859.25	0.9	0.5	29.5	0.378	17	65	11.5	1	93.4483	0.0418967	24.9	0.105161
2	10.26	150	858.8	859.7	859.25	0.9	0.5	29.5	0.378	17	65	11.5	1	93.4483	0.0418967	24.9	0.0431536
3	10.26	150	858.8	859.7	859.25	0.9	0.5	29.5	0.378	17	65	11.5	1	93.4483	0.0418967	24.9	0.0192725
4	10.26	150	858.8	859.7	859.25	0.9	0.5	29.5	0.378	17	65	11.5	1	93.4483	0.0418967	24.9	0.0297466
5	10.26	150	858.8	859.7	859.25	0.9	0.5	29.5	0.378	17	65	11.5	1	93.4483	0.0418967	24.9	0.0234621
6	10.26	150	858.8	859.7	859.25	0.9	0.5	29.5	0.378	17	65	11.5	1	93.4483	0.0418967	24.9	0.0184345
7	10.26	150	858.8	859.7	859.25	0.9	0.5	29.5	0.378	17	65	11.5	1	93.4483	0.0418967	24.9	0.0322604
8	10.26	150	858.8	859.7	859.25	0.9	0.5	29.5	0.378	17	65	11.5	1	93.4483	0.0418967	24.9	0.0339363
9	10.26	150	858.8	859.7	859.25	0.9	0.5	29.5	0.378	17	65	11.5	1	93.4483	0.0418967	24.9	0.038126
1	8.02	125	871.8	873.8	872.8	1.6	0.6	29.7	0.279	29	114.24	19	1	89.2857	0.147749	24.9	1.49818
2	8.02	125	871.8	873.8	872.8	1.6	0.6	29.7	0.279	29	114.24	19	1	89.2857	0.147749	24.9	2.05815
3	8.02	125	871.8	873.8	872.8	1.6	0.6	29.7	0.279	29	114.24	19	1	89.2857	0.147749	24.9	1.89119
4	8.02	125	871.8	873.8	872.8	1.6	0.6	29.7	0.279	29	114.24	19	1	89.2857	0.147749	24.9	1.51
5	8.02	125	871.8	873.8	872.8	1.6	0.6	29.7	0.279	29	114.24	19	1	89.2857	0.147749	24.9	0.935253
6	8.02	125	871.8	873.8	872.8	1.6	0.6	29.7	0.279	29	114.24	19	1	89.2857	0.147749	24.9	0.543718
7	8.02	125	871.8	873.8	872.8	1.6	0.6	29.7	0.279	29	114.24	19	1	89.2857	0.147749	24.9	0.610205
8	8.02	125	871.8	873.8	872.8	1.6	0.6	29.7	0.279	29	114.24	19	1	89.2857	0.147749	24.9	0.56588
1	9.01	175	892.6	895.7	894.15	3.1	1.3	28.9	0.218	26	143.08	24	1	96.7259	0.0700168	25.05	0.237357
2	9.01	175	892.6	895.7	894.15	3.1	1.3	28.9	0.218	26	143.08	24	1	96.7259	0.0700168	25.05	0.269565
3	9.01	175	892.6	895.7	894.15	3.1	1.3	28.9	0.218	26	143.08	24	1	96.7259	0.0700168	25.05	0.237357
4	9.01	175	892.6	895.7	894.15	3.1	1.3	28.9	0.218	26	143.08	24	1	96.7259	0.0700168	25.05	0.204449
5	9.01	175	892.6	895.7	894.15	3.1	1.3	28.9	0.218	26	143.08	24	1	96.7259	0.0700168	25.05	0.212851
6	9.01	175	892.6	895.7	894.15	3.1	1.3	28.9	0.218	26	143.08	24	1	96.7259	0.0700168	25.05	0.162439
7	9.01	175	892.6	895.7	894.15	3.1	1.3	28.9	0.218	26	143.08	24	1	96.7259	0.0700168	25.05	0.112027
8	9.01	175	892.6	895.7	894.15	3.1	1.3	28.9	0.218	26	143.08	24	1	96.7259	0.0700168	25.05	0.105725
9	9.01	175	892.6	895.7	894.15	3.1	1.3	28.9	0.218	26	143.08	24	1	96.7259	0.0700168	25.05	0.091722
10	9.01	175	892.6	895.7	894.15	3.1	1.3	28.9	0.218	26	143.08	24	1	96.7259	0.0700168	25.05	0.107826
11	9.01	175	892.6	895.7	894.15	3.1	1.3	28.9	0.218	26	143.08	24	1	96.7259	0.0700168	25.05	0.0826198
12	9.01	175	892.6	895.7	894.15	3.1	1.3	28.9	0.218	26	143.08	24	1	96.7259	0.0700168	25.05	0.103625
1	9.01	175	902.6	905	903.8	2.4	1.1	30	0.647	30	143.36	24	1	96.7259	0.175833	25.05	0.596072
2	9.01	175	902.6	905	903.8	2.4	1.1	30	0.647	30	143.36	24	1	96.7259	0.175833	25.05	0.676955
3	9.01	175	902.6	905	903.8	2.4	1.1	30	0.647	30	143.36	24	1	96.7259	0.175833	25.05	0.596072
4	9.01	175	902.6	905	903.8	2.4	1.1	30	0.647	30	143.36	24	1	96.7259	0.175833	25.05	0.513431
5	9.01	175	902.6	905	903.8	2.4	1.1	30	0.647	30	143.36	24	1	96.7259	0.175833	25.05	0.534531
6	9.01	175	902.6	905	903.8	2.4	1.1	30	0.647	30	143.36	24	1	96.7259	0.175833	25.05	0.407932
7	9.01	175	902.6	905	903.8	2.4	1.1	30	0.647	30	143.36	24	1	96.7259	0.175833	25.05	0.281332
8	9.01	175	902.6	905	903.8	2.4	1.1	30	0.647	30	143.36	24	1	96.7259	0.175833	25.05	0.265507
9	9.01	175	902.6	905	903.8	2.4	1.1	30	0.647	30	143.36	24	1	96.7259	0.175833	25.05	0.230341
10	9.01	175	902.6	905	903.8	2.4	1.1	30	0.647	30	143.36	24	1	96.7259	0.175833	25.05	0.270782
11	9.01	175	902.6	905	903.8	2.4	1.1	30	0.647	30	143.36	24	1	96.7259	0.175833	25.05	0.207482
12	9.01	175	902.6	905	903.8	2.4	1.1	30	0.647	30	143.36	24	1	96.7259	0.175833	25.05	0.260232
1	10.32	175	895.6	904.4	900	6.9	5.9	29.8	0.72	23	236.88	40	1	99.5556	0.467944	24.99	0.809544
2	10.32	175	895.6	904.4	900	6.9	5.9	29.8	0.72	23	236.88	40	1	99.5556	0.467944	24.99	0.814223
3	10.32	175	895.6	904.4	900	6.9	5.9	29.8	0.72	23	236.88	40	1	99.5556	0.467944	24.99	1.0248
4	10.32	175	895.6	904.4	900	6.9	5.9	29.8	0.72	23	236.88	40	1	99.5556	0.467944	24.99	0.949927
5	10.32	175	895.6	904.4	900	6.9	5.9	29.8	0.72	23	236.88	40	1	99.5556	0.467944	24.99	0.809544
6	10.32	175	895.6	904.4	900	6.9	5.9	29.8	0.72	23	236.88	40	1	99.5556	0.467944	24.99	0.8423
7	10.32	175	895.6	904.4	900	6.9	5.9	29.8	0.72	23	236.88	40	1	99.5556	0.467944	24.99	0.729993
8	10.32	175	895.6	904.4	900	6.9	5.9	29.8	0.72	23	236.88	40	1	99.5556	0.467944	24.99	0.945248
9	10.32	175	895.6	904.4	900	6.9	5.9	29.8	0.72	23	236.88	40	1	99.5556	0.467944	24.99	1.17922
10	10.32	175	895.6	904.4	900	6.9	5.9	29.8	0.72	23	236.88	40	1	99.5556	0.467944	24.99	0.973325
11	10.32	175	895.6	904.4	900	6.9	5.9	29.8	0.72	23	236.88	40	1	99.5556	0.467944	24.99	0.804865
12	10.32	175	895.6	904.4	900	6.9	5.9	29.8	0.72	23	236.88	40	1	99.5556	0.467944	24.99	0.641084
1	10.32	175	931.9	941	936.45	9.1	6.9	29.8	0.7	23	236.88	40	1	99.5556	0.532056	24.99	0.920456
2	10.32	175	931.9	941	936.45	9.1	6.9	29.8	0.7	23	236.88	40	1	99.5556	0.532056	24.99	0.925777
3	10.32	175	931.9	941	936.45	9.1	6.9	29.8	0.7	23	236.88	40	1	99.5556	0.532056	24.99	1.1652
4	10.32	175	931.9	941	936.45	9.1	6.9	29.8	0.7	23	236.88	40	1	99.5556	0.532056	24.99	1.08007
[truncated: 4,033 more rows]
