# Supplementary material for: Data-driven intelligent productivity prediction model for horizontal fracture stimulation
Source: Frontiers journal article supplement (doi:10.3389/feart.2025.1601363), 2025-08-01
Supplement: Table_5.xlsx [file Table_5.xlsx]

## Sheet: 07
Post-fracture duration(mon)	Clustering results	present fomraiton pressure(MPa)	well spacing(m)	depth at the top(m)	oil bed depth(m)	Depth of the central part of the oil layer(m)	Sandstone thickness(m)	Effective thickness(m)	Porosity(%)	permeability(μm)	Breakdown pressure(MPa)	Total liquid volume(m^3)	quantity of sand added(m^3)	Number of fracture slits (slits)	Daily oil production from small layer before fracturing (t)	Daily water production from small layer before fracturing (t)	pre-fracture water content(%)	Production capacity splitting factor(1)	Daily oil increase(t)
1	7	9.36	175	964.3	970.3	967.3	5.4	4.6	32.1	0.331	27	429.99	60	2	1.30369	19.2259	93.6497	0.716315	1.99136
2	7	9.36	175	964.3	970.3	967.3	5.4	4.6	32.1	0.331	27	429.99	60	2	1.30369	19.2259	93.6497	0.716315	1.99136
3	7	9.36	175	964.3	970.3	967.3	5.4	4.6	32.1	0.331	27	429.99	60	2	1.30369	19.2259	93.6497	0.716315	0.0358158
4	7	9.36	175	964.3	970.3	967.3	5.4	4.6	32.1	0.331	27	429.99	60	2	1.30369	19.2259	93.6497	0.716315	0.0358158
1	7	7.18	175	948.2	956.4	952.3	8.2	5.5	31.7	1.097	25	80.64	12	1	1.55907	22.5979	93.5461	0.579581	1.47793
2	7	7.18	175	948.2	956.4	952.3	8.2	5.5	31.7	1.097	25	80.64	12	1	1.55907	22.5979	93.5461	0.579581	1.13018
3	7	7.18	175	948.2	956.4	952.3	8.2	5.5	31.7	1.097	25	80.64	12	1	1.55907	22.5979	93.5461	0.579581	1.25769
4	7	7.18	175	948.2	956.4	952.3	8.2	5.5	31.7	1.097	25	80.64	12	1	1.55907	22.5979	93.5461	0.579581	0.973697
5	7	7.18	175	948.2	956.4	952.3	8.2	5.5	31.7	1.097	25	80.64	12	1	1.55907	22.5979	93.5461	0.579581	1.12439
6	7	7.18	175	948.2	956.4	952.3	8.2	5.5	31.7	1.097	25	80.64	12	1	1.55907	22.5979	93.5461	0.579581	1.99956
7	7	7.18	175	948.2	956.4	952.3	8.2	5.5	31.7	1.097	25	80.64	12	1	1.55907	22.5979	93.5461	0.579581	2.86893
8	7	7.18	175	948.2	956.4	952.3	8.2	5.5	31.7	1.097	25	80.64	12	1	1.55907	22.5979	93.5461	0.579581	3.5992
9	7	7.18	175	948.2	956.4	952.3	8.2	5.5	31.7	1.097	25	80.64	12	1	1.55907	22.5979	93.5461	0.579581	2.01694
10	7	7.18	175	948.2	956.4	952.3	8.2	5.5	31.7	1.097	25	80.64	12	1	1.55907	22.5979	93.5461	0.579581	1.88364
11	7	7.18	175	948.2	956.4	952.3	8.2	5.5	31.7	1.097	25	80.64	12	1	1.55907	22.5979	93.5461	0.579581	1.50112
1	7	9.64	150	967.6	972	969.8	4.4	2.9	31	0.899	26	77.18	12	1	0.241701	8.41926	97.2093	0.503544	0.206453
2	7	9.64	150	967.6	972	969.8	4.4	2.9	31	0.899	26	77.18	12	1	0.241701	8.41926	97.2093	0.503544	0.0654607
3	7	9.64	150	967.6	972	969.8	4.4	2.9	31	0.899	26	77.18	12	1	0.241701	8.41926	97.2093	0.503544	0.140992
4	7	9.64	150	967.6	972	969.8	4.4	2.9	31	0.899	26	77.18	12	1	0.241701	8.41926	97.2093	0.503544	0.251772
5	7	9.64	150	967.6	972	969.8	4.4	2.9	31	0.899	26	77.18	12	1	0.241701	8.41926	97.2093	0.503544	0.387729
6	7	9.64	150	967.6	972	969.8	4.4	2.9	31	0.899	26	77.18	12	1	0.241701	8.41926	97.2093	0.503544	0.337375
7	7	9.64	150	967.6	972	969.8	4.4	2.9	31	0.899	26	77.18	12	1	0.241701	8.41926	97.2093	0.503544	0.468296
8	7	9.64	150	967.6	972	969.8	4.4	2.9	31	0.899	26	77.18	12	1	0.241701	8.41926	97.2093	0.503544	0.28702
9	7	9.64	150	967.6	972	969.8	4.4	2.9	31	0.899	26	77.18	12	1	0.241701	8.41926	97.2093	0.503544	0.377658
10	7	9.64	150	967.6	972	969.8	4.4	2.9	31	0.899	26	77.18	12	1	0.241701	8.41926	97.2093	0.503544	0.458225
11	7	9.64	150	967.6	972	969.8	4.4	2.9	31	0.899	26	77.18	12	1	0.241701	8.41926	97.2093	0.503544	0.357516
1	7	11.61	175	1019.4	1027	1023.2	7.6	6.9	32.2	0.608	22	91.7	15	1	2.24839	23.2171	91.1708	0.610975	0.439902
2	7	11.61	175	1019.4	1027	1023.2	7.6	6.9	32.2	0.608	22	91.7	15	1	2.24839	23.2171	91.1708	0.610975	0.537658
3	7	11.61	175	1019.4	1027	1023.2	7.6	6.9	32.2	0.608	22	91.7	15	1	2.24839	23.2171	91.1708	0.610975	0.378805
4	7	11.61	175	1019.4	1027	1023.2	7.6	6.9	32.2	0.608	22	91.7	15	1	2.24839	23.2171	91.1708	0.610975	0.0427683
5	7	11.61	175	1019.4	1027	1023.2	7.6	6.9	32.2	0.608	22	91.7	15	1	2.24839	23.2171	91.1708	0.610975	0.0855365
6	7	11.61	175	1019.4	1027	1023.2	7.6	6.9	32.2	0.608	22	91.7	15	1	2.24839	23.2171	91.1708	0.610975	0.116085
7	7	11.61	175	1019.4	1027	1023.2	7.6	6.9	32.2	0.608	22	91.7	15	1	2.24839	23.2171	91.1708	0.610975	0.757609
8	7	11.61	175	1019.4	1027	1023.2	7.6	6.9	32.2	0.608	22	91.7	15	1	2.24839	23.2171	91.1708	0.610975	1.07532
9	7	11.61	175	1019.4	1027	1023.2	7.6	6.9	32.2	0.608	22	91.7	15	1	2.24839	23.2171	91.1708	0.610975	0.99589
10	7	11.61	175	1019.4	1027	1023.2	7.6	6.9	32.2	0.608	22	91.7	15	1	2.24839	23.2171	91.1708	0.610975	1.42968
11	7	11.61	175	1019.4	1027	1023.2	7.6	6.9	32.2	0.608	22	91.7	15	1	2.24839	23.2171	91.1708	0.610975	2.65163
12	7	11.61	175	1019.4	1027	1023.2	7.6	6.9	32.2	0.608	22	91.7	15	1	2.24839	23.2171	91.1708	0.610975	4.77172
1	7	11.61	175	1039.6	1047.4	1043.5	6.5	5.3	31.7	0.504	23	242.48	29	2	1.43161	14.7829	91.1708	0.389025	0.280098
2	7	11.61	175	1039.6	1047.4	1043.5	6.5	5.3	31.7	0.504	23	242.48	29	2	1.43161	14.7829	91.1708	0.389025	0.342342
3	7	11.61	175	1039.6	1047.4	1043.5	6.5	5.3	31.7	0.504	23	242.48	29	2	1.43161	14.7829	91.1708	0.389025	0.241195
4	7	11.61	175	1039.6	1047.4	1043.5	6.5	5.3	31.7	0.504	23	242.48	29	2	1.43161	14.7829	91.1708	0.389025	0.0272317
5	7	11.61	175	1039.6	1047.4	1043.5	6.5	5.3	31.7	0.504	23	242.48	29	2	1.43161	14.7829	91.1708	0.389025	0.0544635
6	7	11.61	175	1039.6	1047.4	1043.5	6.5	5.3	31.7	0.504	23	242.48	29	2	1.43161	14.7829	91.1708	0.389025	0.0739147
7	7	11.61	175	1039.6	1047.4	1043.5	6.5	5.3	31.7	0.504	23	242.48	29	2	1.43161	14.7829	91.1708	0.389025	0.482391
8	7	11.61	175	1039.6	1047.4	1043.5	6.5	5.3	31.7	0.504	23	242.48	29	2	1.43161	14.7829	91.1708	0.389025	0.684684
9	7	11.61	175	1039.6	1047.4	1043.5	6.5	5.3	31.7	0.504	23	242.48	29	2	1.43161	14.7829	91.1708	0.389025	0.63411
10	7	11.61	175	1039.6	1047.4	1043.5	6.5	5.3	31.7	0.504	23	242.48	29	2	1.43161	14.7829	91.1708	0.389025	0.910318
11	7	11.61	175	1039.6	1047.4	1043.5	6.5	5.3	31.7	0.504	23	242.48	29	2	1.43161	14.7829	91.1708	0.389025	1.68837
12	7	11.61	175	1039.6	1047.4	1043.5	6.5	5.3	31.7	0.504	23	242.48	29	2	1.43161	14.7829	91.1708	0.389025	3.03828
1	7	11.77	150	1125.6	1129	1127.3	3	1.8	29.5	0.415	28	76.32	12	1	0.22153	4.79244	95.5817	0.184609	0.308296
2	7	11.77	150	1125.6	1129	1127.3	3	1.8	29.5	0.415	28	76.32	12	1	0.22153	4.79244	95.5817	0.184609	0.810431
3	7	11.77	150	1125.6	1129	1127.3	3	1.8	29.5	0.415	28	76.32	12	1	0.22153	4.79244	95.5817	0.184609	0.777202
4	7	11.77	150	1125.6	1129	1127.3	3	1.8	29.5	0.415	28	76.32	12	1	0.22153	4.79244	95.5817	0.184609	1.05042
5	7	11.77	150	1125.6	1129	1127.3	3	1.8	29.5	0.415	28	76.32	12	1	0.22153	4.79244	95.5817	0.184609	1.37164
6	7	11.77	150	1125.6	1129	1127.3	3	1.8	29.5	0.415	28	76.32	12	1	0.22153	4.79244	95.5817	0.184609	1.04488
7	7	11.77	150	1125.6	1129	1127.3	3	1.8	29.5	0.415	28	76.32	12	1	0.22153	4.79244	95.5817	0.184609	0.73105
8	7	11.77	150	1125.6	1129	1127.3	3	1.8	29.5	0.415	28	76.32	12	1	0.22153	4.79244	95.5817	0.184609	0.153225
1	7	11.77	150	1142.1	1146.2	1144.15	4.1	1.6	28.8	0.378	29	95.18	15	1	0.179359	3.88014	95.5817	0.149466	0.249609
2	7	11.77	150	1142.1	1146.2	1144.15	4.1	1.6	28.8	0.378	29	95.18	15	1	0.179359	3.88014	95.5817	0.149466	0.656157
3	7	11.77	150	1142.1	1146.2	1144.15	4.1	1.6	28.8	0.378	29	95.18	15	1	0.179359	3.88014	95.5817	0.149466	0.629253
4	7	11.77	150	1142.1	1146.2	1144.15	4.1	1.6	28.8	0.378	29	95.18	15	1	0.179359	3.88014	95.5817	0.149466	0.850463
5	7	11.77	150	1142.1	1146.2	1144.15	4.1	1.6	28.8	0.378	29	95.18	15	1	0.179359	3.88014	95.5817	0.149466	1.11053
6	7	11.77	150	1142.1	1146.2	1144.15	4.1	1.6	28.8	0.378	29	95.18	15	1	0.179359	3.88014	95.5817	0.149466	0.845979
7	7	11.77	150	1142.1	1146.2	1144.15	4.1	1.6	28.8	0.378	29	95.18	15	1	0.179359	3.88014	95.5817	0.149466	0.591886
8	7	11.77	150	1142.1	1146.2	1144.15	4.1	1.6	28.8	0.378	29	95.18	15	1	0.179359	3.88014	95.5817	0.149466	0.124057
1	7	10.79	175	1035	1049.3	1042.15	14.3	12.7	30.4	1.026	27	283.26	37	2	2.20026	39.8892	94.7724	0.948389	2.48478
2	7	10.79	175	1035	1049.3	1042.15	14.3	12.7	30.4	1.026	27	283.26	37	2	2.20026	39.8892	94.7724	0.948389	1.39413
3	7	10.79	175	1035	1049.3	1042.15	14.3	12.7	30.4	1.026	27	283.26	37	2	2.20026	39.8892	94.7724	0.948389	1.43207
4	7	10.79	175	1035	1049.3	1042.15	14.3	12.7	30.4	1.026	27	283.26	37	2	2.20026	39.8892	94.7724	0.948389	0.806131
5	7	10.79	175	1035	1049.3	1042.15	14.3	12.7	30.4	1.026	27	283.26	37	2	2.20026	39.8892	94.7724	0.948389	0.34142
1	7	9.15	125	953.4	959.9	956.65	5.4	3.7	31.7	0.846	32	177.3	29	2	0.649504	3.3535	83.7746	0.271759	1.2202
2	7	9.15	125	953.4	959.9	956.65	5.4	3.7	31.7	0.846	32	177.3	29	2	0.649504	3.3535	83.7746	0.271759	0.943003
3	7	9.15	125	953.4	959.9	956.65	5.4	3.7	31.7	0.846	32	177.3	29	2	0.649504	3.3535	83.7746	0.271759	0.741902
4	7	9.15	125	953.4	959.9	956.65	5.4	3.7	31.7	0.846	32	177.3	29	2	0.649504	3.3535	83.7746	0.271759	0.375027
5	7	9.15	125	953.4	959.9	956.65	5.4	3.7	31.7	0.846	32	177.3	29	2	0.649504	3.3535	83.7746	0.271759	0.277194
6	7	9.15	125	953.4	959.9	956.65	5.4	3.7	31.7	0.846	32	177.3	29	2	0.649504	3.3535	83.7746	0.271759	0.301652
1	7	10.79	175	1059.5	1068.5	1064	6.9	4.8	31.5	0.564	30	204.04	33	2	2.36874	40.8231	94.5158	0.518323	0.637537
2	7	10.79	175	1059.5	1068.5	1064	6.9	4.8	31.5	0.564	30	204.04	33	2	2.36874	40.8231	94.5158	0.518323	0.212512
1	7	10.79	175	1070.2	1077.3	1073.75	5.5	3.6	28.6	0.393	41	268.22	43	2	1.23792	21.3344	94.5158	0.270879	0.333181
2	7	10.79	175	1070.2	1077.3	1073.75	5.5	3.6	28.6	0.393	41	268.22	43	2	1.23792	21.3344	94.5158	0.270879	0.11106
1	7	10.79	175	1082.2	1087.9	1085.05	4.2	3	28.9	0.367	30	99.32	15	1	0.963349	16.6025	94.5158	0.210798	0.259282
2	7	10.79	175	1082.2	1087.9	1085.05	4.2	3	28.9	0.367	30	99.32	15	1	0.963349	16.6025	94.5158	0.210798	0.0864273
1	7	8.87	175	970.8	974.2	972.5	3.4	2.4	32.2	1.33	28	320.01	50	1	2.06286	38.6514	94.9333	0.904762	7.41
2	7	8.87	175	970.8	974.2	972.5	3.4	2.4	32.2	1.33	28	320.01	50	1	2.06286	38.6514	94.9333	0.904762	6.40571
3	7	8.87	175	970.8	974.2	972.5	3.4	2.4	32.2	1.33	28	320.01	50	1	2.06286	38.6514	94.9333	0.904762	6.20667
4	7	8.87	175	970.8	974.2	972.5	3.4	2.4	32.2	1.33	28	320.01	50	1	2.06286	38.6514	94.9333	0.904762	4.94905
5	7	8.87	175	970.8	974.2	972.5	3.4	2.4	32.2	1.33	28	320.01	50	1	2.06286	38.6514	94.9333	0.904762	2.6781
6	7	8.87	175	970.8	974.2	972.5	3.4	2.4	32.2	1.33	28	320.01	50	1	2.06286	38.6514	94.9333	0.904762	1.14905
7	7	8.87	175	970.8	974.2	972.5	3.4	2.4	32.2	1.33	28	320.01	50	1	2.06286	38.6514	94.9333	0.904762	0.904762
8	7	8.87	175	970.8	974.2	972.5	3.4	2.4	32.2	1.33	28	320.01	50	1	2.06286	38.6514	94.9333	0.904762	0.398095
9	7	8.87	175	970.8	974.2	972.5	3.4	2.4	32.2	1.33	28	320.01	50	1	2.06286	38.6514	94.9333	0.904762	0.15381
1	7	9.83	125	860.5	867	863.75	6.1	4.4	29.7	0.342	24	113.76	19	1	0.909799	14.4396	94.0728	0.390472	0.359234
2	7	9.83	125	860.5	867	863.75	6.1	4.4	29.7	0.342	24	113.76	19	1	0.909799	14.4396	94.0728	0.390472	0.335806
3	7	9.83	125	860.5	867	863.75	6.1	4.4	29.7	0.342	24	113.76	19	1	0.909799	14.4396	94.0728	0.390472	0.632564
4	7	9.83	125	860.5	867	863.75	6.1	4.4	29.7	0.342	24	113.76	19	1	0.909799	14.4396	94.0728	0.390472	0.605231
5	7	9.83	125	860.5	867	863.75	6.1	4.4	29.7	0.342	24	113.76	19	1	0.909799	14.4396	94.0728	0.390472	0.484185
6	7	9.83	125	860.5	867	863.75	6.1	4.4	29.7	0.342	24	113.76	19	1	0.909799	14.4396	94.0728	0.390472	0.292854
7	7	9.83	125	860.5	867	863.75	6.1	4.4	29.7	0.342	24	113.76	19	1	0.909799	14.4396	94.0728	0.390472	0.109332
8	7	9.83	125	860.5	867	863.75	6.1	4.4	29.7	0.342	24	113.76	19	1	0.909799	14.4396	94.0728	0.390472	0.0312377
1	7	10.21	175	1010.8	1014.5	1012.65	3.7	3.1	31.6	0.952	31	55.92	9	1	0.40855	4.95601	92.3843	0.133513	0.650209
2	7	10.21	175	1010.8	1014.5	1012.65	3.7	3.1	31.6	0.952	31	55.92	9	1	0.40855	4.95601	92.3843	0.133513	0.324437
3	7	10.21	175	1010.8	1014.5	1012.65	3.7	3.1	31.6	0.952	31	55.92	9	1	0.40855	4.95601	92.3843	0.133513	0.280377
4	7	10.21	175	1010.8	1014.5	1012.65	3.7	3.1	31.6	0.952	31	55.92	9	1	0.40855	4.95601	92.3843	0.133513	0.404545
5	7	10.21	175	1010.8	1014.5	1012.65	3.7	3.1	31.6	0.952	31	55.92	9	1	0.40855	4.95601	92.3843	0.133513	0.388523
6	7	10.21	175	1010.8	1014.5	1012.65	3.7	3.1	31.6	0.952	31	55.92	9	1	0.40855	4.95601	92.3843	0.133513	0.316426
7	7	10.21	175	1010.8	1014.5	1012.65	3.7	3.1	31.6	0.952	31	55.92	9	1	0.40855	4.95601	92.3843	0.133513	0.303075
8	7	10.21	175	1010.8	1014.5	1012.65	3.7	3.1	31.6	0.952	31	55.92	9	1	0.40855	4.95601	92.3843	0.133513	0.236318
9	7	10.21	175	1010.8	1014.5	1012.65	3.7	3.1	31.6	0.952	31	55.92	9	1	0.40855	4.95601	92.3843	0.133513	0.20561
10	7	10.21	175	1010.8	1014.5	1012.65	3.7	3.1	31.6	0.952	31	55.92	9	1	0.40855	4.95601	92.3843	0.133513	0.0894538
11	7	10.21	175	1010.8	1014.5	1012.65	3.7	3.1	31.6	0.952	31	55.92	9	1	0.40855	4.95601	92.3843	0.133513	0.0400539
12	7	10.21	175	1010.8	1014.5	1012.65	3.7	3.1	31.6	0.952	31	55.92	9	1	0.40855	4.95601	92.3843	0.133513	0.0173567
1	7	10.21	175	1016.3	1028.9	1022.6	12.6	11.6	31.6	1.219	29	106.08	17	2	1.95753	23.7462	92.3843	0.639716	3.11541
2	7	10.21	175	1016.3	1028.9	1022.6	12.6	11.6	31.6	1.219	29	106.08	17	2	1.95753	23.7462	92.3843	0.639716	1.55451
3	7	10.21	175	1016.3	1028.9	1022.6	12.6	11.6	31.6	1.219	29	106.08	17	2	1.95753	23.7462	92.3843	0.639716	1.3434
4	7	10.21	175	1016.3	1028.9	1022.6	12.6	11.6	31.6	1.219	29	106.08	17	2	1.95753	23.7462	92.3843	0.639716	1.93834
5	7	10.21	175	1016.3	1028.9	1022.6	12.6	11.6	31.6	1.219	29	106.08	17	2	1.95753	23.7462	92.3843	0.639716	1.86157
6	7	10.21	175	1016.3	1028.9	1022.6	12.6	11.6	31.6	1.219	29	106.08	17	2	1.95753	23.7462	92.3843	0.639716	1.51613
7	7	10.21	175	1016.3	1028.9	1022.6	12.6	11.6	31.6	1.219	29	106.08	17	2	1.95753	23.7462	92.3843	0.639716	1.45215
8	7	10.21	175	1016.3	1028.9	1022.6	12.6	11.6	31.6	1.219	29	106.08	17	2	1.95753	23.7462	92.3843	0.639716	1.1323
9	7	10.21	175	1016.3	1028.9	1022.6	12.6	11.6	31.6	1.219	29	106.08	17	2	1.95753	23.7462	92.3843	0.639716	0.985162
10	7	10.21	175	1016.3	1028.9	1022.6	12.6	11.6	31.6	1.219	29	106.08	17	2	1.95753	23.7462	92.3843	0.639716	0.428609
11	7	10.21	175	1016.3	1028.9	1022.6	12.6	11.6	31.6	1.219	29	106.08	17	2	1.95753	23.7462	92.3843	0.639716	0.191915
12	7	10.21	175	1016.3	1028.9	1022.6	12.6	11.6	31.6	1.219	29	106.08	17	2	1.95753	23.7462	92.3843	0.639716	0.083163
1	7	10.19	175	972.7	976.6	974.65	3.9	3.7	32.8	1.024	23	314	45	1	1.53218	31.3114	95.3349	0.982165	5.53941
2	7	10.19	175	972.7	976.6	974.65	3.9	3.7	32.8	1.024	23	314	45	1	1.53218	31.3114	95.3349	0.982165	7.91625
3	7	10.19	175	972.7	976.6	974.65	3.9	3.7	32.8	1.024	23	314	45	1	1.53218	31.3114	95.3349	0.982165	7.17963
4	7	10.19	175	972.7	976.6	974.65	3.9	3.7	32.8	1.024	23	314	45	1	1.53218	31.3114	95.3349	0.982165	6.87516
5	7	10.19	175	972.7	976.6	974.65	3.9	3.7	32.8	1.024	23	314	45	1	1.53218	31.3114	95.3349	0.982165	5.42155
6	7	10.19	175	972.7	976.6	974.65	3.9	3.7	32.8	1.024	23	314	45	1	1.53218	31.3114	95.3349	0.982165	6.5314
7	7	10.19	175	972.7	976.6	974.65	3.9	3.7	32.8	1.024	23	314	45	1	1.53218	31.3114	95.3349	0.982165	4.28224
8	7	10.19	175	972.7	976.6	974.65	3.9	3.7	32.8	1.024	23	314	45	1	1.53218	31.3114	95.3349	0.982165	5.43137
9	7	10.19	175	972.7	976.6	974.65	3.9	3.7	32.8	1.024	23	314	45	1	1.53218	31.3114	95.3349	0.982165	2.95632
10	7	10.19	175	972.7	976.6	974.65	3.9	3.7	32.8	1.024	23	314	45	1	1.53218	31.3114	95.3349	0.982165	2.46523
1	7	10.19	175	977	980	978.5	3	2.3	31.6	0.92	30	315	45	1	0.539881	12.1847	95.7572	0.415293	2.38793
2	7	10.19	175	977	980	978.5	3	2.3	31.6	0.92	30	315	45	1	0.539881	12.1847	95.7572	0.415293	2.83645
3	7	10.19	175	977	980	978.5	3	2.3	31.6	0.92	30	315	45	1	0.539881	12.1847	95.7572	0.415293	2.23428
4	7	10.19	175	977	980	978.5	3	2.3	31.6	0.92	30	315	45	1	0.539881	12.1847	95.7572	0.415293	2.02248
5	7	10.19	175	977	980	978.5	3	2.3	31.6	0.92	30	315	45	1	0.539881	12.1847	95.7572	0.415293	1.69024
6	7	10.19	175	977	980	978.5	3	2.3	31.6	0.92	30	315	45	1	0.539881	12.1847	95.7572	0.415293	1.15867
7	7	10.19	175	977	980	978.5	3	2.3	31.6	0.92	30	315	45	1	0.539881	12.1847	95.7572	0.415293	0.818127
8	7	10.19	175	977	980	978.5	3	2.3	31.6	0.92	30	315	45	1	0.539881	12.1847	95.7572	0.415293	0.784903
9	7	10.19	175	977	980	978.5	3	2.3	31.6	0.92	30	315	45	1	0.539881	12.1847	95.7572	0.415293	1.07561
10	7	10.19	175	977	980	978.5	3	2.3	31.6	0.92	30	315	45	1	0.539881	12.1847	95.7572	0.415293	0.286552
1	7	9.54	175	990.7	1000.5	995.6	9.8	8.5	31.5	0.92	34	91.26	15	1	1.46332	20.6832	93.3925	0.457289	0.361258
2	7	9.54	175	990.7	1000.5	995.6	9.8	8.5	31.5	0.92	34	91.26	15	1	1.46332	20.6832	93.3925	0.457289	0.589902
3	7	9.54	175	990.7	1000.5	995.6	9.8	8.5	31.5	0.92	34	91.26	15	1	1.46332	20.6832	93.3925	0.457289	1.20724
4	7	9.54	175	990.7	1000.5	995.6	9.8	8.5	31.5	0.92	34	91.26	15	1	1.46332	20.6832	93.3925	0.457289	0.882567
5	7	9.54	175	990.7	1000.5	995.6	9.8	8.5	31.5	0.92	34	91.26	15	1	1.46332	20.6832	93.3925	0.457289	0.631058
6	7	9.54	175	990.7	1000.5	995.6	9.8	8.5	31.5	0.92	34	91.26	15	1	1.46332	20.6832	93.3925	0.457289	0.576184
7	7	9.54	175	990.7	1000.5	995.6	9.8	8.5	31.5	0.92	34	91.26	15	1	1.46332	20.6832	93.3925	0.457289	0.41156
1	7	8.72	106	977	982.8	979.9	5.8	5.4	32.5	1.17	30	292.65	40	1	0.460353	44.2148	98.9696	0.697505	5.87299
2	7	8.72	106	977	982.8	979.9	5.8	5.4	32.5	1.17	30	292.65	40	1	0.460353	44.2148	98.9696	0.697505	5.63584
3	7	8.72	106	977	982.8	979.9	5.8	5.4	32.5	1.17	30	292.65	40	1	0.460353	44.2148	98.9696	0.697505	4.75698
4	7	8.72	106	977	982.8	979.9	5.8	5.4	32.5	1.17	30	292.65	40	1	0.460353	44.2148	98.9696	0.697505	4.18503
5	7	8.72	106	977	982.8	979.9	5.8	5.4	32.5	1.17	30	292.65	40	1	0.460353	44.2148	98.9696	0.697505	3.90603
6	7	8.72	106	977	982.8	979.9	5.8	5.4	32.5	1.17	30	292.65	40	1	0.460353	44.2148	98.9696	0.697505	3.4666
7	7	8.72	106	977	982.8	979.9	5.8	5.4	32.5	1.17	30	292.65	40	1	0.460353	44.2148	98.9696	0.697505	3.48055
8	7	8.72	106	977	982.8	979.9	5.8	5.4	32.5	1.17	30	292.65	40	1	0.460353	44.2148	98.9696	0.697505	4.66631
9	7	8.72	106	977	982.8	979.9	5.8	5.4	32.5	1.17	30	292.65	40	1	0.460353	44.2148	98.9696	0.697505	4.1641
10	7	8.72	106	977	982.8	979.9	5.8	5.4	32.5	1.17	30	292.65	40	1	0.460353	44.2148	98.9696	0.697505	2.97835
11	7	8.72	106	977	982.8	979.9	5.8	5.4	32.5	1.17	30	292.65	40	1	0.460353	44.2148	98.9696	0.697505	2.85977
12	7	8.72	106	977	982.8	979.9	5.8	5.4	32.5	1.17	30	292.65	40	1	0.460353	44.2148	98.9696	0.697505	2.39942
1	7	11.25	125	998.6	1001.1	999.85	2.5	2.1	31.3	0.722	31	73.98	12	1	0	0	0	0.224094	1.71432
2	7	11.25	125	998.6	1001.1	999.85	2.5	2.1	31.3	0.722	31	73.98	12	1	0	0	0	0.224094	1.77931
3	7	11.25	125	998.6	1001.1	999.85	2.5	2.1	31.3	0.722	31	73.98	12	1	0	0	0	0.224094	1.59779
4	7	11.25	125	998.6	1001.1	999.85	2.5	2.1	31.3	0.722	31	73.98	12	1	0	0	0	0.224094	1.26389
5	7	11.25	125	998.6	1001.1	999.85	2.5	2.1	31.3	0.722	31	73.98	12	1	0	0	0	0.224094	1.22131
6	7	11.25	125	998.6	1001.1	999.85	2.5	2.1	31.3	0.722	31	73.98	12	1	0	0	0	0.224094	1.58883
7	7	11.25	125	998.6	1001.1	999.85	2.5	2.1	31.3	0.722	31	73.98	12	1	0	0	0	0.224094	1.88912
8	7	11.25	125	998.6	1001.1	999.85	2.5	2.1	31.3	0.722	31	73.98	12	1	0	0	0	0.224094	1.54625
9	7	11.25	125	998.6	1001.1	999.85	2.5	2.1	31.3	0.722	31	73.98	12	1	0	0	0	0.224094	1.1989
10	7	11.25	125	998.6	1001.1	999.85	2.5	2.1	31.3	0.722	31	73.98	12	1	0	0	0	0.224094	1.1003
11	7	11.25	125	998.6	1001.1	999.85	2.5	2.1	31.3	0.722	31	73.98	12	1	0	0	0	0.224094	1.54401
12	7	11.25	125	998.6	1001.1	999.85	2.5	2.1	31.3	0.722	31	73.98	12	1	0	0	0	0.224094	1.31095
1	7	12.18	150	952.4	958.6	955.5	3.1	2.5	31.5	0.588	27	177.56	29	2	1.3991	17.0734	92.426	0.728697	2.05492
2	7	12.18	150	952.4	958.6	955.5	3.1	2.5	31.5	0.588	27	177.56	29	2	1.3991	17.0734	92.426	0.728697	3.2427
3	7	12.18	150	952.4	958.6	955.5	3.1	2.5	31.5	0.588	27	177.56	29	2	1.3991	17.0734	92.426	0.728697	3.44674
4	7	12.18	150	952.4	958.6	955.5	3.1	2.5	31.5	0.588	27	177.56	29	2	1.3991	17.0734	92.426	0.728697	1.20964
1	7	9.68	175	983	997.7	990.35	11.7	7.3	29.9	0.655	35	77.88	12	2	1.76981	33.0392	94.9157	0.838771	1.54334
2	7	9.68	175	983	997.7	990.35	11.7	7.3	29.9	0.655	35	77.88	12	2	1.76981	33.0392	94.9157	0.838771	3.12862
3	7	9.68	175	983	997.7	990.35	11.7	7.3	29.9	0.655	35	77.88	12	2	1.76981	33.0392	94.9157	0.838771	3.15378
4	7	9.68	175	983	997.7	990.35	11.7	7.3	29.9	0.655	35	77.88	12	2	1.76981	33.0392	94.9157	0.838771	2.27307
5	7	9.68	175	983	997.7	990.35	11.7	7.3	29.9	0.655	35	77.88	12	2	1.76981	33.0392	94.9157	0.838771	2.08854
6	7	9.68	175	983	997.7	990.35	11.7	7.3	29.9	0.655	35	77.88	12	2	1.76981	33.0392	94.9157	0.838771	2.21436
7	7	9.68	175	983	997.7	990.35	11.7	7.3	29.9	0.655	35	77.88	12	2	1.76981	33.0392	94.9157	0.838771	1.81175
8	7	9.68	175	983	997.7	990.35	11.7	7.3	29.9	0.655	35	77.88	12	2	1.76981	33.0392	94.9157	0.838771	1.26654
9	7	9.68	175	983	997.7	990.35	11.7	7.3	29.9	0.655	35	77.88	12	2	1.76981	33.0392	94.9157	0.838771	0.813608
10	7	9.68	175	983	997.7	990.35	11.7	7.3	29.9	0.655	35	77.88	12	2	1.76981	33.0392	94.9157	0.838771	1.20783
11	7	9.68	175	983	997.7	990.35	11.7	7.3	29.9	0.655	35	77.88	12	2	1.76981	33.0392	94.9157	0.838771	1.20783
12	7	9.68	175	983	997.7	990.35	11.7	7.3	29.9	0.655	35	77.88	12	2	1.76981	33.0392	94.9157	0.838771	1.28332
1	7	9.4	106	903.7	909	906.35	5.3	4.8	30.5	0.804	21	47.76	7	1	2.52044	25.4025	90.9736	0.79259	2.93258
2	7	9.4	106	903.7	909	906.35	5.3	4.8	30.5	0.804	21	47.76	7	1	2.52044	25.4025	90.9736	0.79259	7.33146
3	7	9.4	106	903.7	909	906.35	5.3	4.8	30.5	0.804	21	47.76	7	1	2.52044	25.4025	90.9736	0.79259	7.81494
4	7	9.4	106	903.7	909	906.35	5.3	4.8	30.5	0.804	21	47.76	7	1	2.52044	25.4025	90.9736	0.79259	10.0738
5	7	9.4	106	903.7	909	906.35	5.3	4.8	30.5	0.804	21	47.76	7	1	2.52044	25.4025	90.9736	0.79259	11.6828
6	7	9.4	106	903.7	909	906.35	5.3	4.8	30.5	0.804	21	47.76	7	1	2.52044	25.4025	90.9736	0.79259	10.7951
7	7	9.4	106	903.7	909	906.35	5.3	4.8	30.5	0.804	21	47.76	7	1	2.52044	25.4025	90.9736	0.79259	9.08308
8	7	9.4	106	903.7	909	906.35	5.3	4.8	30.5	0.804	21	47.76	7	1	2.52044	25.4025	90.9736	0.79259	8.27464
9	7	9.4	106	903.7	909	906.35	5.3	4.8	30.5	0.804	21	47.76	7	1	2.52044	25.4025	90.9736	0.79259	4.74761
10	7	9.4	106	903.7	909	906.35	5.3	4.8	30.5	0.804	21	47.76	7	1	2.52044	25.4025	90.9736	0.79259	3.9471
11	7	9.4	106	903.7	909	906.35	5.3	4.8	30.5	0.804	21	47.76	7	1	2.52044	25.4025	90.9736	0.79259	1.88636
1	7	9.02	125	975.5	979	977.25	3.5	2.7	32.5	0.836	20	71.14	11.5	1	3.67053	28.7607	88.6821	0.701822	2.1195
2	7	9.02	125	975.5	979	977.25	3.5	2.7	32.5	0.836	20	71.14	11.5	1	3.67053	28.7607	88.6821	0.701822	3.71966
3	7	9.02	125	975.5	979	977.25	3.5	2.7	32.5	0.836	20	71.14	11.5	1	3.67053	28.7607	88.6821	0.701822	3.83195
4	7	9.02	125	975.5	979	977.25	3.5	2.7	32.5	0.836	20	71.14	11.5	1	3.67053	28.7607	88.6821	0.701822	5.88127
5	7	9.02	125	975.5	979	977.25	3.5	2.7	32.5	0.836	20	71.14	11.5	1	3.67053	28.7607	88.6821	0.701822	6.27429
6	7	9.02	125	975.5	979	977.25	3.5	2.7	32.5	0.836	20	71.14	11.5	1	3.67053	28.7607	88.6821	0.701822	6.42869
7	7	9.02	125	975.5	979	977.25	3.5	2.7	32.5	0.836	20	71.14	11.5	1	3.67053	28.7607	88.6821	0.701822	5.25665
8	7	9.02	125	975.5	979	977.25	3.5	2.7	32.5	0.836	20	71.14	11.5	1	3.67053	28.7607	88.6821	0.701822	3.9302
9	7	9.02	125	975.5	979	977.25	3.5	2.7	32.5	0.836	20	71.14	11.5	1	3.67053	28.7607	88.6821	0.701822	3.36173
10	7	9.02	125	975.5	979	977.25	3.5	2.7	32.5	0.836	20	71.14	11.5	1	3.67053	28.7607	88.6821	0.701822	4.75134
11	7	9.02	125	975.5	979	977.25	3.5	2.7	32.5	0.836	20	71.14	11.5	1	3.67053	28.7607	88.6821	0.701822	3.6214
1	7	12.04	150	1099.9	1106	1102.95	4.6	3.4	28.2	0.456	25	50.68	8	1	0.173872	13.8964	98.7643	0.445825	1.84126
2	7	12.04	150	1099.9	1106	1102.95	4.6	3.4	28.2	0.456	25	50.68	8	1	0.173872	13.8964	98.7643	0.445825	2.40745
3	7	12.04	150	1099.9	1106	1102.95	4.6	3.4	28.2	0.456	25	50.68	8	1	0.173872	13.8964	98.7643	0.445825	2.17117
4	7	12.04	150	1099.9	1106	1102.95	4.6	3.4	28.2	0.456	25	50.68	8	1	0.173872	13.8964	98.7643	0.445825	0.271953
5	7	12.04	150	1099.9	1106	1102.95	4.6	3.4	28.2	0.456	25	50.68	8	1	0.173872	13.8964	98.7643	0.445825	0.343285
6	7	12.04	150	1099.9	1106	1102.95	4.6	3.4	28.2	0.456	25	50.68	8	1	0.173872	13.8964	98.7643	0.445825	0.365576
7	7	12.04	150	1099.9	1106	1102.95	4.6	3.4	28.2	0.456	25	50.68	8	1	0.173872	13.8964	98.7643	0.445825	0.414617
8	7	12.04	150	1099.9	1106	1102.95	4.6	3.4	28.2	0.456	25	50.68	8	1	0.173872	13.8964	98.7643	0.445825	0.601863
9	7	12.04	150	1099.9	1106	1102.95	4.6	3.4	28.2	0.456	25	50.68	8	1	0.173872	13.8964	98.7643	0.445825	0.557281
10	7	12.04	150	1099.9	1106	1102.95	4.6	3.4	28.2	0.456	25	50.68	8	1	0.173872	13.8964	98.7643	0.445825	0.624155
11	7	12.04	150	1099.9	1106	1102.95	4.6	3.4	28.2	0.456	25	50.68	8	1	0.173872	13.8964	98.7643	0.445825	0.624155
12	7	12.04	150	1099.9	1106	1102.95	4.6	3.4	28.2	0.456	25	50.68	8	1	0.173872	13.8964	98.7643	0.445825	0.624155
1	7	9.96	175	987.4	998.6	993	11.2	4.2	31.5	0.909	33	680	100	2	0.788687	40.687	98.0984	0.927867	2.07842
2	7	9.96	175	987.4	998.6	993	11.2	4.2	31.5	0.909	33	680	100	2	0.788687	40.687	98.0984	0.927867	0.593835
3	7	9.96	175	987.4	998.6	993	11.2	4.2	31.5	0.909	33	680	100	2	0.788687	40.687	98.0984	0.927867	0.343311
4	7	9.96	175	987.4	998.6	993	11.2	4.2	31.5	0.909	33	680	100	2	0.788687	40.687	98.0984	0.927867	0.677343
5	7	9.96	175	987.4	998.6	993	11.2	4.2	31.5	0.909	33	680	100	2	0.788687	40.687	98.0984	0.927867	1.19695
6	7	9.96	175	987.4	998.6	993	11.2	4.2	31.5	0.909	33	680	100	2	0.788687	40.687	98.0984	0.927867	0.955703
7	7	9.96	175	987.4	998.6	993	11.2	4.2	31.5	0.909	33	680	100	2	0.788687	40.687	98.0984	0.927867	0.760851
8	7	9.96	175	987.4	998.6	993	11.2	4.2	31.5	0.909	33	680	100	2	0.788687	40.687	98.0984	0.927867	1.14128
9	7	9.96	175	987.4	998.6	993	11.2	4.2	31.5	0.909	33	680	100	2	0.788687	40.687	98.0984	0.927867	0.612392
10	7	9.96	175	987.4	998.6	993	11.2	4.2	31.5	0.909	33	680	100	2	0.788687	40.687	98.0984	0.927867	0.862916
11	7	9.96	175	987.4	998.6	993	11.2	4.2	31.5	0.909	33	680	100	2	0.788687	40.687	98.0984	0.927867	0.853637
12	7	9.96	175	987.4	998.6	993	11.2	4.2	31.5	0.909	33	680	100	2	0.788687	40.687	98.0984	0.927867	0.992817
1	7	8.94	175	974.5	985	979.75	9.7	6.1	31.9	0.948	38	680	100	2	1.12048	84.2336	98.6873	0.941579	1.45003
2	7	8.94	175	974.5	985	979.75	9.7	6.1	31.9	0.948	38	680	100	2	1.12048	84.2336	98.6873	0.941579	0.188316
3	7	8.94	175	974.5	985	979.75	9.7	6.1	31.9	0.948	38	680	100	2	1.12048	84.2336	98.6873	0.941579	0.0188316
4	7	8.94	175	974.5	985	979.75	9.7	6.1	31.9	0.948	38	680	100	2	1.12048	84.2336	98.6873	0.941579	0.630858
5	7	8.94	175	974.5	985	979.75	9.7	6.1	31.9	0.948	38	680	100	2	1.12048	84.2336	98.6873	0.941579	0.621442
6	7	8.94	175	974.5	985	979.75	9.7	6.1	31.9	0.948	38	680	100	2	1.12048	84.2336	98.6873	0.941579	3.36144
7	7	8.94	175	974.5	985	979.75	9.7	6.1	31.9	0.948	38	680	100	2	1.12048	84.2336	98.6873	0.941579	5.99786
8	7	8.94	175	974.5	985	979.75	9.7	6.1	31.9	0.948	38	680	100	2	1.12048	84.2336	98.6873	0.941579	3.578
9	7	8.94	175	974.5	985	979.75	9.7	6.1	31.9	0.948	38	680	100	2	1.12048	84.2336	98.6873	0.941579	3.56858
10	7	8.94	175	974.5	985	979.75	9.7	6.1	31.9	0.948	38	680	100	2	1.12048	84.2336	98.6873	0.941579	3.31436
11	7	8.94	175	974.5	985	979.75	9.7	6.1	31.9	0.948	38	680	100	2	1.12048	84.2336	98.6873	0.941579	2.48577
12	7	8.94	175	974.5	985	979.75	9.7	6.1	31.9	0.948	38	680	100	2	1.12048	84.2336	98.6873	0.941579	0.499037
1	7	8.94	125	986.9	990.3	988.6	3	1.3	31.2	0.276	34	680	100	2	0.0695213	5.22637	98.6873	0.0584213	0.0899687
2	7	8.94	125	986.9	990.3	988.6	3	1.3	31.2	0.276	34	680	100	2	0.0695213	5.22637	98.6873	0.0584213	0.0116843
3	7	8.94	125	986.9	990.3	988.6	3	1.3	31.2	0.276	34	680	100	2	0.0695213	5.22637	98.6873	0.0584213	0.00116843
4	7	8.94	125	986.9	990.3	988.6	3	1.3	31.2	0.276	34	680	100	2	0.0695213	5.22637	98.6873	0.0584213	0.0391422
5	7	8.94	125	986.9	990.3	988.6	3	1.3	31.2	0.276	34	680	100	2	0.0695213	5.22637	98.6873	0.0584213	0.038558
6	7	8.94	125	986.9	990.3	988.6	3	1.3	31.2	0.276	34	680	100	2	0.0695213	5.22637	98.6873	0.0584213	0.208564
7	7	8.94	125	986.9	990.3	988.6	3	1.3	31.2	0.276	34	680	100	2	0.0695213	5.22637	98.6873	0.0584213	0.372143
8	7	8.94	125	986.9	990.3	988.6	3	1.3	31.2	0.276	34	680	100	2	0.0695213	5.22637	98.6873	0.0584213	0.222001
9	7	8.94	125	986.9	990.3	988.6	3	1.3	31.2	0.276	34	680	100	2	0.0695213	5.22637	98.6873	0.0584213	0.221417
10	7	8.94	125	986.9	990.3	988.6	3	1.3	31.2	0.276	34	680	100	2	0.0695213	5.22637	98.6873	0.0584213	0.205643
11	7	8.94	125	986.9	990.3	988.6	3	1.3	31.2	0.276	34	680	100	2	0.0695213	5.22637	98.6873	0.0584213	0.154232
12	7	8.94	125	986.9	990.3	988.6	3	1.3	31.2	0.276	34	680	100	2	0.0695213	5.22637	98.6873	0.0584213	0.0309633
1	7	9.96	125	958.8	963.4	961.1	4.6	4.2	32.2	1.281	32	490	70	2	1.19956	32.3749	96.4272	0.651932	2.21657
2	7	9.96	125	958.8	963.4	961.1	4.6	4.2	32.2	1.281	32	490	70	2	1.19956	32.3749	96.4272	0.651932	2.03403
3	7	9.96	125	958.8	963.4	961.1	4.6	4.2	32.2	1.281	32	490	70	2	1.19956	32.3749	96.4272	0.651932	0.312927
4	7	9.96	125	958.8	963.4	961.1	4.6	4.2	32.2	1.281	32	490	70	2	1.19956	32.3749	96.4272	0.651932	0.397679
5	7	9.96	125	958.8	963.4	961.1	4.6	4.2	32.2	1.281	32	490	70	2	1.19956	32.3749	96.4272	0.651932	0.541104
6	7	9.96	125	958.8	963.4	961.1	4.6	4.2	32.2	1.281	32	490	70	2	1.19956	32.3749	96.4272	0.651932	0.899666
7	7	9.96	125	958.8	963.4	961.1	4.6	4.2	32.2	1.281	32	490	70	2	1.19956	32.3749	96.4272	0.651932	1.02353
8	7	9.96	125	958.8	963.4	961.1	4.6	4.2	32.2	1.281	32	490	70	2	1.19956	32.3749	96.4272	0.651932	0.143425
9	7	9.96	125	958.8	963.4	961.1	4.6	4.2	32.2	1.281	32	490	70	2	1.19956	32.3749	96.4272	0.651932	0.691048
1	7	9.96	125	966.4	970.4	968.4	3.5	2.1	31.6	0.825	24	610	90	2	0.386274	10.4252	96.4272	0.209931	0.713766
2	7	9.96	125	966.4	970.4	968.4	3.5	2.1	31.6	0.825	24	610	90	2	0.386274	10.4252	96.4272	0.209931	0.654986
3	7	9.96	125	966.4	970.4	968.4	3.5	2.1	31.6	0.825	24	610	90	2	0.386274	10.4252	96.4272	0.209931	0.100767
4	7	9.96	125	966.4	970.4	968.4	3.5	2.1	31.6	0.825	24	610	90	2	0.386274	10.4252	96.4272	0.209931	0.128058
5	7	9.96	125	966.4	970.4	968.4	3.5	2.1	31.6	0.825	24	610	90	2	0.386274	10.4252	96.4272	0.209931	0.174243
6	7	9.96	125	966.4	970.4	968.4	3.5	2.1	31.6	0.825	24	610	90	2	0.386274	10.4252	96.4272	0.209931	0.289705
7	7	9.96	125	966.4	970.4	968.4	3.5	2.1	31.6	0.825	24	610	90	2	0.386274	10.4252	96.4272	0.209931	0.329592
8	7	9.96	125	966.4	970.4	968.4	3.5	2.1	31.6	0.825	24	610	90	2	0.386274	10.4252	96.4272	0.209931	0.0461849
9	7	9.96	125	966.4	970.4	968.4	3.5	2.1	31.6	0.825	24	610	90	2	0.386274	10.4252	96.4272	0.209931	0.222527
1	7	10.77	175	978.8	983.9	981.35	5.1	4.3	31.9	0.715	29	73.76	11.5	1	0	0	0	0.953955	5.32307
2	7	10.77	175	978.8	983.9	981.35	5.1	4.3	31.9	0.715	29	73.76	11.5	1	0	0	0	0.953955	5.8859
3	7	10.77	175	978.8	983.9	981.35	5.1	4.3	31.9	0.715	29	73.76	11.5	1	0	0	0	0.953955	5.31353
4	7	10.77	175	978.8	983.9	981.35	5.1	4.3	31.9	0.715	29	73.76	11.5	1	0	0	0	0.953955	4.31187
5	7	10.77	175	978.8	983.9	981.35	5.1	4.3	31.9	0.715	29	73.76	11.5	1	0	0	0	0.953955	5.08458
6	7	10.77	175	978.8	983.9	981.35	5.1	4.3	31.9	0.715	29	73.76	11.5	1	0	0	0	0.953955	5.02734
7	7	10.77	175	978.8	983.9	981.35	5.1	4.3	31.9	0.715	29	73.76	11.5	1	0	0	0	0.953955	4.21648
8	7	10.77	175	978.8	983.9	981.35	5.1	4.3	31.9	0.715	29	73.76	11.5	1	0	0	0	0.953955	3.68226
9	7	10.77	175	978.8	983.9	981.35	5.1	4.3	31.9	0.715	29	73.76	11.5	1	0	0	0	0.953955	3.92075
10	7	10.77	175	978.8	983.9	981.35	5.1	4.3	31.9	0.715	29	73.76	11.5	1	0	0	0	0.953955	4.06385
11	7	10.77	175	978.8	983.9	981.35	5.1	4.3	31.9	0.715	29	73.76	11.5	1	0	0	0	0.953955	4.46451
12	7	10.77	175	978.8	983.9	981.35	5.1	4.3	31.9	0.715	29	73.76	11.5	1	0	0	0	0.953955	4.09246
1	7	8.72	175	945	952	948.5	7	4.7	30	0.788	0	0	0	1	3.09	25.84	89.319	1	0.51
2	7	8.72	175	945	952	948.5	7	4.7	30	0.788	0	0	0	1	3.09	25.84	89.319	1	2.94
3	7	8.72	175	945	952	948.5	7	4.7	30	0.788	0	0	0	1	3.09	25.84	89.319	1	2.93
4	7	8.72	175	945	952	948.5	7	4.7	30	0.788	0	0	0	1	3.09	25.84	89.319	1	3.64
5	7	8.72	175	945	952	948.5	7	4.7	30	0.788	0	0	0	1	3.09	25.84	89.319	1	4.32
6	7	8.72	175	945	952	948.5	7	4.7	30	0.788	0	0	0	1	3.09	25.84	89.319	1	3.15
7	7	8.72	175	945	952	948.5	7	4.7	30	0.788	0	0	0	1	3.09	25.84	89.319	1	2.06
8	7	8.72	175	945	952	948.5	7	4.7	30	0.788	0	0	0	1	3.09	25.84	89.319	1	1.88
9	7	8.72	175	945	952	948.5	7	4.7	30	0.788	0	0	0	1	3.09	25.84	89.319	1	2.42
10	7	8.72	175	945	952	948.5	7	4.7	30	0.788	0	0	0	1	3.09	25.84	89.319	1	1.71
11	7	8.72	175	945	952	948.5	7	4.7	30	0.788	0	0	0	1	3.09	25.84	89.319	1	1.49
1	7	8.6	175	961.2	967	964.1	5.8	5.7	31.4	1.241	29	285	45	1	0.25604	34.83	99.2703	0.853466	0.990021
2	7	8.6	175	961.2	967	964.1	5.8	5.7	31.4	1.241	29	285	45	1	0.25604	34.83	99.2703	0.853466	0.827862
3	7	8.6	175	961.2	967	964.1	5.8	5.7	31.4	1.241	29	285	45	1	0.25604	34.83	99.2703	0.853466	1.37408
4	7	8.6	175	961.2	967	964.1	5.8	5.7	31.4	1.241	29	285	45	1	0.25604	34.83	99.2703	0.853466	0.588892
5	7	8.6	175	961.2	967	964.1	5.8	5.7	31.4	1.241	29	285	45	1	0.25604	34.83	99.2703	0.853466	0.520614
6	7	8.6	175	961.2	967	964.1	5.8	5.7	31.4	1.241	29	285	45	1	0.25604	34.83	99.2703	0.853466	0.862001
7	7	8.6	175	961.2	967	964.1	5.8	5.7	31.4	1.241	29	285	45	1	0.25604	34.83	99.2703	0.853466	0.776654
8	7	8.6	175	961.2	967	964.1	5.8	5.7	31.4	1.241	29	285	45	1	0.25604	34.83	99.2703	0.853466	0.213367
9	7	8.6	175	961.2	967	964.1	5.8	5.7	31.4	1.241	29	285	45	1	0.25604	34.83	99.2703	0.853466	0.264575
10	7	8.6	175	961.2	967	964.1	5.8	5.7	31.4	1.241	29	285	45	1	0.25604	34.83	99.2703	0.853466	0.571822
11	7	8.6	175	961.2	967	964.1	5.8	5.7	31.4	1.241	29	285	45	1	0.25604	34.83	99.2703	0.853466	0.477941
12	7	8.6	175	961.2	967	964.1	5.8	5.7	31.4	1.241	29	285	45	1	0.25604	34.83	99.2703	0.853466	0.426733
1	7	8.6	175	969.2	972.7	970.95	3.5	0.5	31.2	0.413	33	360	55	1	0.00747448	1.01678	99.2703	0.0249149	0.0289013
2	7	8.6	175	969.2	972.7	970.95	3.5	0.5	31.2	0.413	33	360	55	1	0.00747448	1.01678	99.2703	0.0249149	0.0241675
3	7	8.6	175	969.2	972.7	970.95	3.5	0.5	31.2	0.413	33	360	55	1	0.00747448	1.01678	99.2703	0.0249149	0.0401131
4	7	8.6	175	969.2	972.7	970.95	3.5	0.5	31.2	0.413	33	360	55	1	0.00747448	1.01678	99.2703	0.0249149	0.0171913
5	7	8.6	175	969.2	972.7	970.95	3.5	0.5	31.2	0.413	33	360	55	1	0.00747448	1.01678	99.2703	0.0249149	0.0151981
6	7	8.6	175	969.2	972.7	970.95	3.5	0.5	31.2	0.413	33	360	55	1	0.00747448	1.01678	99.2703	0.0249149	0.0251641
7	7	8.6	175	969.2	972.7	970.95	3.5	0.5	31.2	0.413	33	360	55	1	0.00747448	1.01678	99.2703	0.0249149	0.0226726
8	7	8.6	175	969.2	972.7	970.95	3.5	0.5	31.2	0.413	33	360	55	1	0.00747448	1.01678	99.2703	0.0249149	0.00622873
9	7	8.6	175	969.2	972.7	970.95	3.5	0.5	31.2	0.413	33	360	55	1	0.00747448	1.01678	99.2703	0.0249149	0.00772363
10	7	8.6	175	969.2	972.7	970.95	3.5	0.5	31.2	0.413	33	360	55	1	0.00747448	1.01678	99.2703	0.0249149	0.016693
11	7	8.6	175	969.2	972.7	970.95	3.5	0.5	31.2	0.413	33	360	55	1	0.00747448	1.01678	99.2703	0.0249149	0.0139524
12	7	8.6	175	969.2	972.7	970.95	3.5	0.5	31.2	0.413	33	360	55	1	0.00747448	1.01678	99.2703	0.0249149	0.0124575
1	7	10.3	150	1112.7	1118.3	1115.5	5.6	4.8	28	0.383	30	74.14	9.5	1	2.15648	30.3191	93.3597	0.855746	4.92054
2	7	10.3	150	1112.7	1118.3	1115.5	5.6	4.8	28	0.383	30	74.14	9.5	1	2.15648	30.3191	93.3597	0.855746	2.7555
1	7	9.97	175	982	987.2	984.6	5.2	3.5	29.9	0.341	27	91	15	1	0.445198	4.96638	91.7732	0.230673	0.0899623
2	7	9.97	175	982	987.2	984.6	5.2	3.5	29.9	0.341	27	91	15	1	0.445198	4.96638	91.7732	0.230673	0.687404
3	7	9.97	175	982	987.2	984.6	5.2	3.5	29.9	0.341	27	91	15	1	0.445198	4.96638	91.7732	0.230673	0.502866
4	7	9.97	175	982	987.2	984.6	5.2	3.5	29.9	0.341	27	91	15	1	0.445198	4.96638	91.7732	0.230673	0.304488
5	7	9.97	175	982	987.2	984.6	5.2	3.5	29.9	0.341	27	91	15	1	0.445198	4.96638	91.7732	0.230673	0.375996
6	7	9.97	175	982	987.2	984.6	5.2	3.5	29.9	0.341	27	91	15	1	0.445198	4.96638	91.7732	0.230673	0.295261
7	7	9.97	175	982	987.2	984.6	5.2	3.5	29.9	0.341	27	91	15	1	0.445198	4.96638	91.7732	0.230673	0.265273
8	7	9.97	175	982	987.2	984.6	5.2	3.5	29.9	0.341	27	91	15	1	0.445198	4.96638	91.7732	0.230673	0.334475
9	7	9.97	175	982	987.2	984.6	5.2	3.5	29.9	0.341	27	91	15	1	0.445198	4.96638	91.7732	0.230673	0.306795
10	7	9.97	175	982	987.2	984.6	5.2	3.5	29.9	0.341	27	91	15	1	0.445198	4.96638	91.7732	0.230673	0.256047
1	7	9.97	175	989.2	994.4	991.8	5.2	4.3	30.4	0.56	32	90.72	15	1	0.89823	10.0201	91.7732	0.465404	0.181508
2	7	9.97	175	989.2	994.4	991.8	5.2	4.3	30.4	0.56	32	90.72	15	1	0.89823	10.0201	91.7732	0.465404	1.3869
3	7	9.97	175	989.2	994.4	991.8	5.2	4.3	30.4	0.56	32	90.72	15	1	0.89823	10.0201	91.7732	0.465404	1.01458
4	7	9.97	175	989.2	994.4	991.8	5.2	4.3	30.4	0.56	32	90.72	15	1	0.89823	10.0201	91.7732	0.465404	0.614333
5	7	9.97	175	989.2	994.4	991.8	5.2	4.3	30.4	0.56	32	90.72	15	1	0.89823	10.0201	91.7732	0.465404	0.758608
6	7	9.97	175	989.2	994.4	991.8	5.2	4.3	30.4	0.56	32	90.72	15	1	0.89823	10.0201	91.7732	0.465404	0.595717
7	7	9.97	175	989.2	994.4	991.8	5.2	4.3	30.4	0.56	32	90.72	15	1	0.89823	10.0201	91.7732	0.465404	0.535215
8	7	9.97	175	989.2	994.4	991.8	5.2	4.3	30.4	0.56	32	90.72	15	1	0.89823	10.0201	91.7732	0.465404	0.674836
9	7	9.97	175	989.2	994.4	991.8	5.2	4.3	30.4	0.56	32	90.72	15	1	0.89823	10.0201	91.7732	0.465404	0.618987
10	7	9.97	175	989.2	994.4	991.8	5.2	4.3	30.4	0.56	32	90.72	15	1	0.89823	10.0201	91.7732	0.465404	0.516598
1	7	7.4	150	893	899.6	896.3	6	3.2	31.6	0.91	21	76.18	11.5	1	1.37986	38.1397	96.5084	0.992705	2.5314
2	7	7.4	150	893	899.6	896.3	6	3.2	31.6	0.91	21	76.18	11.5	1	1.37986	38.1397	96.5084	0.992705	1.76701
3	7	7.4	150	893	899.6	896.3	6	3.2	31.6	0.91	21	76.18	11.5	1	1.37986	38.1397	96.5084	0.992705	3.22629
4	7	7.4	150	893	899.6	896.3	6	3.2	31.6	0.91	21	76.18	11.5	1	1.37986	38.1397	96.5084	0.992705	3.97082
5	7	7.4	150	893	899.6	896.3	6	3.2	31.6	0.91	21	76.18	11.5	1	1.37986	38.1397	96.5084	0.992705	4.67564
6	7	7.4	150	893	899.6	896.3	6	3.2	31.6	0.91	21	76.18	11.5	1	1.37986	38.1397	96.5084	0.992705	3.10717
7	7	7.4	150	893	899.6	896.3	6	3.2	31.6	0.91	21	76.18	11.5	1	1.37986	38.1397	96.5084	0.992705	1.89607
8	7	7.4	150	893	899.6	896.3	6	3.2	31.6	0.91	21	76.18	11.5	1	1.37986	38.1397	96.5084	0.992705	3.61345
9	7	7.4	150	893	899.6	896.3	6	3.2	31.6	0.91	21	76.18	11.5	1	1.37986	38.1397	96.5084	0.992705	3.70279
10	7	7.4	150	893	899.6	896.3	6	3.2	31.6	0.91	21	76.18	11.5	1	1.37986	38.1397	96.5084	0.992705	3.92118
11	7	7.4	150	893	899.6	896.3	6	3.2	31.6	0.91	21	76.18	11.5	1	1.37986	38.1397	96.5084	0.992705	5.3209
12	7	7.4	150	893	899.6	896.3	6	3.2	31.6	0.91	21	76.18	11.5	1	1.37986	38.1397	96.5084	0.992705	3.54396
1	7	9.64	150	967.6	972	969.8	4.4	2.9	31	0.899	26	117.52	19	1	0.699926	12.1203	94.5405	0.503544	0.468296
2	7	9.64	150	967.6	972	969.8	4.4	2.9	31	0.899	26	117.52	19	1	0.699926	12.1203	94.5405	0.503544	0.478367
3	7	9.64	150	967.6	972	969.8	4.4	2.9	31	0.899	26	117.52	19	1	0.699926	12.1203	94.5405	0.503544	0.402835
4	7	9.64	150	967.6	972	969.8	4.4	2.9	31	0.899	26	117.52	19	1	0.699926	12.1203	94.5405	0.503544	0.045319
5	7	9.64	150	967.6	972	969.8	4.4	2.9	31	0.899	26	117.52	19	1	0.699926	12.1203	94.5405	0.503544	0.0302127
1	7	8.94	175	995.3	1001.1	998.2	4.9	3.4	31.8	0.388	40	360	40	1	2.07472	64.4518	96.8814	0.797968	17.7707
2	7	8.94	175	995.3	1001.1	998.2	4.9	3.4	31.8	0.388	40	360	40	1	2.07472	64.4518	96.8814	0.797968	14.7464
3	7	8.94	175	995.3	1001.1	998.2	4.9	3.4	31.8	0.388	40	360	40	1	2.07472	64.4518	96.8814	0.797968	8.74572
4	7	8.94	175	995.3	1001.1	998.2	4.9	3.4	31.8	0.388	40	360	40	1	2.07472	64.4518	96.8814	0.797968	7.19767
5	7	8.94	175	995.3	1001.1	998.2	4.9	3.4	31.8	0.388	40	360	40	1	2.07472	64.4518	96.8814	0.797968	4.57235
6	7	8.94	175	995.3	1001.1	998.2	4.9	3.4	31.8	0.388	40	360	40	1	2.07472	64.4518	96.8814	0.797968	2.26623
7	7	8.94	175	995.3	1001.1	998.2	4.9	3.4	31.8	0.388	40	360	40	1	2.07472	64.4518	96.8814	0.797968	1.72361
8	7	8.94	175	995.3	1001.1	998.2	4.9	3.4	31.8	0.388	40	360	40	1	2.07472	64.4518	96.8814	0.797968	0.861805
9	7	8.94	175	995.3	1001.1	998.2	4.9	3.4	31.8	0.388	40	360	40	1	2.07472	64.4518	96.8814	0.797968	0.686252
10	7	8.94	175	995.3	1001.1	998.2	4.9	3.4	31.8	0.388	40	360	40	1	2.07472	64.4518	96.8814	0.797968	2.11461
11	7	8.94	175	995.3	1001.1	998.2	4.9	3.4	31.8	0.388	40	360	40	1	2.07472	64.4518	96.8814	0.797968	1.59594
12	7	8.94	175	995.3	1001.1	998.2	4.9	3.4	31.8	0.388	40	360	40	1	2.07472	64.4518	96.8814	0.797968	0.48676
1	7	7.28	175	976	982.4	979.2	5.2	3.7	32.3	1.194	31	385	50	1	1.6202	25.9528	94.124	0.987924	6.7574
2	7	7.28	175	976	982.4	979.2	5.2	3.7	32.3	1.194	31	385	50	1	1.6202	25.9528	94.124	0.987924	6.66849
3	7	7.28	175	976	982.4	979.2	5.2	3.7	32.3	1.194	31	385	50	1	1.6202	25.9528	94.124	0.987924	6.2832
4	7	7.28	175	976	982.4	979.2	5.2	3.7	32.3	1.194	31	385	50	1	1.6202	25.9528	94.124	0.987924	4.92974
5	7	7.28	175	976	982.4	979.2	5.2	3.7	32.3	1.194	31	385	50	1	1.6202	25.9528	94.124	0.987924	2.27223
6	7	7.28	175	976	982.4	979.2	5.2	3.7	32.3	1.194	31	385	50	1	1.6202	25.9528	94.124	0.987924	0.810098
7	7	7.28	175	976	982.4	979.2	5.2	3.7	32.3	1.194	31	385	50	1	1.6202	25.9528	94.124	0.987924	1.0966
8	7	7.28	175	976	982.4	979.2	5.2	3.7	32.3	1.194	31	385	50	1	1.6202	25.9528	94.124	0.987924	0.721185
9	7	7.28	175	976	982.4	979.2	5.2	3.7	32.3	1.194	31	385	50	1	1.6202	25.9528	94.124	0.987924	1.46213
10	7	7.28	175	976	982.4	979.2	5.2	3.7	32.3	1.194	31	385	50	1	1.6202	25.9528	94.124	0.987924	0.582875
11	7	7.28	175	976	982.4	979.2	5.2	3.7	32.3	1.194	31	385	50	1	1.6202	25.9528	94.124	0.987924	0.335894
12	7	7.28	175	976	982.4	979.2	5.2	3.7	32.3	1.194	31	385	50	1	1.6202	25.9528	94.124	0.987924	0.108672
1	7	10.77	175	963.5	969.6	966.55	5.5	4.6	31.5	0.966	25	117.2	19	1	1.56073	27.2651	94.5857	0.732735	0.849973
2	7	10.77	175	963.5	969.6	966.55	5.5	4.6	31.5	0.966	25	117.2	19	1	1.56073	27.2651	94.5857	0.732735	0.542224
3	7	10.77	175	963.5	969.6	966.55	5.5	4.6	31.5	0.966	25	117.2	19	1	1.56073	27.2651	94.5857	0.732735	2.23484
4	7	10.77	175	963.5	969.6	966.55	5.5	4.6	31.5	0.966	25	117.2	19	1	1.56073	27.2651	94.5857	0.732735	2.54992
5	7	10.77	175	963.5	969.6	966.55	5.5	4.6	31.5	0.966	25	117.2	19	1	1.56073	27.2651	94.5857	0.732735	3.54644
6	7	10.77	175	963.5	969.6	966.55	5.5	4.6	31.5	0.966	25	117.2	19	1	1.56073	27.2651	94.5857	0.732735	3.65635
7	7	10.77	175	963.5	969.6	966.55	5.5	4.6	31.5	0.966	25	117.2	19	1	1.56073	27.2651	94.5857	0.732735	3.23136
8	7	10.77	175	963.5	969.6	966.55	5.5	4.6	31.5	0.966	25	117.2	19	1	1.56073	27.2651	94.5857	0.732735	1.82451
9	7	10.77	175	963.5	969.6	966.55	5.5	4.6	31.5	0.966	25	117.2	19	1	1.56073	27.2651	94.5857	0.732735	1.94175
1	7	9.08	175	1070.2	1077.3	1073.75	5.5	3.6	28.6	0.393	34	271.78	45	2	0	0	0	0.397438	1.68514
2	7	9.08	175	1070.2	1077.3	1073.75	5.5	3.6	28.6	0.393	34	271.78	45	2	0	0	0	0.397438	2.04681
3	7	9.08	175	1070.2	1077.3	1073.75	5.5	3.6	28.6	0.393	34	271.78	45	2	0	0	0	0.397438	2.49194
4	7	9.08	175	1070.2	1077.3	1073.75	5.5	3.6	28.6	0.393	34	271.78	45	2	0	0	0	0.397438	2.2336
5	7	9.08	175	1070.2	1077.3	1073.75	5.5	3.6	28.6	0.393	34	271.78	45	2	0	0	0	0.397438	1.90373
6	7	9.08	175	1070.2	1077.3	1073.75	5.5	3.6	28.6	0.393	34	271.78	45	2	0	0	0	0.397438	1.58975
7	7	9.08	175	1070.2	1077.3	1073.75	5.5	3.6	28.6	0.393	34	271.78	45	2	0	0	0	0.397438	1.32347
8	7	9.08	175	1070.2	1077.3	1073.75	5.5	3.6	28.6	0.393	34	271.78	45	2	0	0	0	0.397438	1.08501
9	7	9.08	175	1070.2	1077.3	1073.75	5.5	3.6	28.6	0.393	34	271.78	45	2	0	0	0	0.397438	1.22411
10	7	9.08	175	1070.2	1077.3	1073.75	5.5	3.6	28.6	0.393	34	271.78	45	2	0	0	0	0.397438	0.918082
11	7	9.08	175	1070.2	1077.3	1073.75	5.5	3.6	28.6	0.393	34	271.78	45	2	0	0	0	0.397438	0.945903
12	7	9.08	175	1070.2	1077.3	1073.75	5.5	3.6	28.6	0.393	34	271.78	45	2	0	0	0	0.397438	1.22013
1	7	9.08	175	1082.2	1087.8	1085	4.1	3	28.9	0.367	27	97.16	16	1	0	0	0	0.309287	1.31138
2	7	9.08	175	1082.2	1087.8	1085	4.1	3	28.9	0.367	27	97.16	16	1	0	0	0	0.309287	1.59283
3	7	9.08	175	1082.2	1087.8	1085	4.1	3	28.9	0.367	27	97.16	16	1	0	0	0	0.309287	1.93923
4	7	9.08	175	1082.2	1087.8	1085	4.1	3	28.9	0.367	27	97.16	16	1	0	0	0	0.309287	1.73819
5	7	9.08	175	1082.2	1087.8	1085	4.1	3	28.9	0.367	27	97.16	16	1	0	0	0	0.309287	1.48148
6	7	9.08	175	1082.2	1087.8	1085	4.1	3	28.9	0.367	27	97.16	16	1	0	0	0	0.309287	1.23715
7	7	9.08	175	1082.2	1087.8	1085	4.1	3	28.9	0.367	27	97.16	16	1	0	0	0	0.309287	1.02993
8	7	9.08	175	1082.2	1087.8	1085	4.1	3	28.9	0.367	27	97.16	16	1	0	0	0	0.309287	0.844354
9	7	9.08	175	1082.2	1087.8	1085	4.1	3	28.9	0.367	27	97.16	16	1	0	0	0	0.309287	0.952604
10	7	9.08	175	1082.2	1087.8	1085	4.1	3	28.9	0.367	27	97.16	16	1	0	0	0	0.309287	0.714453
11	7	9.08	175	1082.2	1087.8	1085	4.1	3	28.9	0.367	27	97.16	16	1	0	0	0	0.309287	0.736103
12	7	9.08	175	1082.2	1087.8	1085	4.1	3	28.9	0.367	27	97.16	16	1	0	0	0	0.309287	0.949511
1	7	8.94	175	962.7	967.4	965.05	4.2	3.6	31.7	1.177	23	320	50	1	0.303702	23.569	98.7278	0.427749	1.11215
2	7	8.94	175	962.7	967.4	965.05	4.2	3.6	31.7	1.177	23	320	50	1	0.303702	23.569	98.7278	0.427749	2.51944
3	7	8.94	175	962.7	967.4	965.05	4.2	3.6	31.7	1.177	23	320	50	1	0.303702	23.569	98.7278	0.427749	2.5665
4	7	8.94	175	962.7	967.4	965.05	4.2	3.6	31.7	1.177	23	320	50	1	0.303702	23.569	98.7278	0.427749	2.0532
5	7	8.94	175	962.7	967.4	965.05	4.2	3.6	31.7	1.177	23	320	50	1	0.303702	23.569	98.7278	0.427749	1.41157
6	7	8.94	175	962.7	967.4	965.05	4.2	3.6	31.7	1.177	23	320	50	1	0.303702	23.569	98.7278	0.427749	1.73239
7	7	8.94	175	962.7	967.4	965.05	4.2	3.6	31.7	1.177	23	320	50	1	0.303702	23.569	98.7278	0.427749	2.35262
8	7	8.94	175	962.7	967.4	965.05	4.2	3.6	31.7	1.177	23	320	50	1	0.303702	23.569	98.7278	0.427749	1.71528
9	7	8.94	175	962.7	967.4	965.05	4.2	3.6	31.7	1.177	23	320	50	1	0.303702	23.569	98.7278	0.427749	1.52707
10	7	8.94	175	962.7	967.4	965.05	4.2	3.6	31.7	1.177	23	320	50	1	0.303702	23.569	98.7278	0.427749	1.25758
11	7	8.94	175	962.7	967.4	965.05	4.2	3.6	31.7	1.177	23	320	50	1	0.303702	23.569	98.7278	0.427749	1.24047
12	7	8.94	175	962.7	967.4	965.05	4.2	3.6	31.7	1.177	23	320	50	1	0.303702	23.569	98.7278	0.427749	1.55701
1	7	8.94	175	967.9	973.9	970.9	6	4.9	31.4	1.144	35	280	40	1	0.401782	31.1806	98.7278	0.565891	1.47132
2	7	8.94	175	967.9	973.9	970.9	6	4.9	31.4	1.144	35	280	40	1	0.401782	31.1806	98.7278	0.565891	3.3331
3	7	8.94	175	967.9	973.9	970.9	6	4.9	31.4	1.144	35	280	40	1	0.401782	31.1806	98.7278	0.565891	3.39534
4	7	8.94	175	967.9	973.9	970.9	6	4.9	31.4	1.144	35	280	40	1	0.401782	31.1806	98.7278	0.565891	2.71628
5	7	8.94	175	967.9	973.9	970.9	6	4.9	31.4	1.144	35	280	40	1	0.401782	31.1806	98.7278	0.565891	1.86744
6	7	8.94	175	967.9	973.9	970.9	6	4.9	31.4	1.144	35	280	40	1	0.401782	31.1806	98.7278	0.565891	2.29186
7	7	8.94	175	967.9	973.9	970.9	6	4.9	31.4	1.144	35	280	40	1	0.401782	31.1806	98.7278	0.565891	3.1124
8	7	8.94	175	967.9	973.9	970.9	6	4.9	31.4	1.144	35	280	40	1	0.401782	31.1806	98.7278	0.565891	2.26922
9	7	8.94	175	967.9	973.9	970.9	6	4.9	31.4	1.144	35	280	40	1	0.401782	31.1806	98.7278	0.565891	2.02023
10	7	8.94	175	967.9	973.9	970.9	6	4.9	31.4	1.144	35	280	40	1	0.401782	31.1806	98.7278	0.565891	1.66372
11	7	8.94	175	967.9	973.9	970.9	6	4.9	31.4	1.144	35	280	40	1	0.401782	31.1806	98.7278	0.565891	1.64108
12	7	8.94	175	967.9	973.9	970.9	6	4.9	31.4	1.144	35	280	40	1	0.401782	31.1806	98.7278	0.565891	2.05984
1	7	9.96	175	962.2	967.8	965	5.6	4.8	31.1	1.219	28	280	40	1	1.22563	29.6987	96.0367	0.91465	1.00612
2	7	9.96	175	962.2	967.8	965	5.6	4.8	31.1	1.219	28	280	40	1	1.22563	29.6987	96.0367	0.91465	3.70433
3	7	9.96	175	962.2	967.8	965	5.6	4.8	31.1	1.219	28	280	40	1	1.22563	29.6987	96.0367	0.91465	5.60681
4	7	9.96	175	962.2	967.8	965	5.6	4.8	31.1	1.219	28	280	40	1	1.22563	29.6987	96.0367	0.91465	3.82324
5	7	9.96	175	962.2	967.8	965	5.6	4.8	31.1	1.219	28	280	40	1	1.22563	29.6987	96.0367	0.91465	1.86589
6	7	9.96	175	962.2	967.8	965	5.6	4.8	31.1	1.219	28	280	40	1	1.22563	29.6987	96.0367	0.91465	1.95735
7	7	9.96	175	962.2	967.8	965	5.6	4.8	31.1	1.219	28	280	40	1	1.22563	29.6987	96.0367	0.91465	1.86589
8	7	9.96	175	962.2	967.8	965	5.6	4.8	31.1	1.219	28	280	40	1	1.22563	29.6987	96.0367	0.91465	1.25307
9	7	9.96	175	962.2	967.8	965	5.6	4.8	31.1	1.219	28	280	40	1	1.22563	29.6987	96.0367	0.91465	2.7531
10	7	9.96	175	962.2	967.8	965	5.6	4.8	31.1	1.219	28	280	40	1	1.22563	29.6987	96.0367	0.91465	2.1037
11	7	9.96	175	962.2	967.8	965	5.6	4.8	31.1	1.219	28	280	40	1	1.22563	29.6987	96.0367	0.91465	2.14943
12	7	9.96	175	962.2	967.8	965	5.6	4.8	31.1	1.219	28	280	40	1	1.22563	29.6987	96.0367	0.91465	2.64334
1	7	8.6	175	957.9	967.1	962.5	8.8	2.2	32.1	1.207	35	682.4	100	2	1.13313	117.188	99.0423	0.864985	0.415193
2	7	8.6	175	957.9	967.1	962.5	8.8	2.2	32.1	1.207	35	682.4	100	2	1.13313	117.188	99.0423	0.864985	4.27303
3	7	8.6	175	957.9	967.1	962.5	8.8	2.2	32.1	1.207	35	682.4	100	2	1.13313	117.188	99.0423	0.864985	2.915
4	7	8.6	175	957.9	967.1	962.5	8.8	2.2	32.1	1.207	35	682.4	100	2	1.13313	117.188	99.0423	0.864985	2.24896
5	7	8.6	175	957.9	967.1	962.5	8.8	2.2	32.1	1.207	35	682.4	100	2	1.13313	117.188	99.0423	0.864985	4.70552
6	7	8.6	175	957.9	967.1	962.5	8.8	2.2	32.1	1.207	35	682.4	100	2	1.13313	117.188	99.0423	0.864985	5.35426
7	7	8.6	175	957.9	967.1	962.5	8.8	2.2	32.1	1.207	35	682.4	100	2	1.13313	117.188	99.0423	0.864985	4.44602
8	7	8.6	175	957.9	967.1	962.5	8.8	2.2	32.1	1.207	35	682.4	100	2	1.13313	117.188	99.0423	0.864985	4.56712
9	7	8.6	175	957.9	967.1	962.5	8.8	2.2	32.1	1.207	35	682.4	100	2	1.13313	117.188	99.0423	0.864985	3.65889
10	7	8.6	175	957.9	967.1	962.5	8.8	2.2	32.1	1.207	35	682.4	100	2	1.13313	117.188	99.0423	0.864985	1.69537
11	7	8.6	175	957.9	967.1	962.5	8.8	2.2	32.1	1.207	35	682.4	100	2	1.13313	117.188	99.0423	0.864985	1.95487
12	7	8.6	175	957.9	967.1	962.5	8.8	2.2	32.1	1.207	35	682.4	100	2	1.13313	117.188	99.0423	0.864985	2.6209
1	7	9.96	175	968.1	975.7	971.9	5	0.7	28.9	0.29	0	779.6	120	2	1.09	112.89	99.0437	1	0.35
2	7	9.96	175	968.1	975.7	971.9	5	0.7	28.9	0.29	0	779.6	120	2	1.09	112.89	99.0437	1	3.43
3	7	9.96	175	968.1	975.7	971.9	5	0.7	28.9	0.29	0	779.6	120	2	1.09	112.89	99.0437	1	4.25
4	7	9.96	175	968.1	975.7	971.9	5	0.7	28.9	0.29	0	779.6	120	2	1.09	112.89	99.0437	1	5.32
5	7	9.96	175	968.1	975.7	971.9	5	0.7	28.9	0.29	0	779.6	120	2	1.09	112.89	99.0437	1	3.59
6	7	9.96	175	968.1	975.7	971.9	5	0.7	28.9	0.29	0	779.6	120	2	1.09	112.89	99.0437	1	3.44
7	7	9.96	175	968.1	975.7	971.9	5	0.7	28.9	0.29	0	779.6	120	2	1.09	112.89	99.0437	1	4.79
8	7	9.96	175	968.1	975.7	971.9	5	0.7	28.9	0.29	0	779.6	120	2	1.09	112.89	99.0437	1	4.12
9	7	9.96	175	968.1	975.7	971.9	5	0.7	28.9	0.29	0	779.6	120	2	1.09	112.89	99.0437	1	3.47
10	7	9.96	175	968.1	975.7	971.9	5	0.7	28.9	0.29	0	779.6	120	2	1.09	112.89	99.0437	1	5.41
11	7	9.96	175	968.1	975.7	971.9	5	0.7	28.9	0.29	0	779.6	120	2	1.09	112.89	99.0437	1	7.59
12	7	9.96	175	968.1	975.7	971.9	5	0.7	28.9	0.29	0	779.6	120	2	1.09	112.89	99.0437	1	6.03
1	7	11.61	175	976	984	980	8	6.5	28.3	0.7	30	76.32	12	1	2.49412	10.8817	81.3535	0.633026	1.18376
2	7	11.61	175	976	984	980	8	6.5	28.3	0.7	30	76.32	12	1	2.49412	10.8817	81.3535	0.633026	1.46229
3	7	11.61	175	976	984	980	8	6.5	28.3	0.7	30	76.32	12	1	2.49412	10.8817	81.3535	0.633026	1.24706
4	7	11.61	175	976	984	980	8	6.5	28.3	0.7	30	76.32	12	1	2.49412	10.8817	81.3535	0.633026	1.70284
5	7	11.61	175	976	984	980	8	6.5	28.3	0.7	30	76.32	12	1	2.49412	10.8817	81.3535	0.633026	2.38018
6	7	11.61	175	976	984	980	8	6.5	28.3	0.7	30	76.32	12	1	2.49412	10.8817	81.3535	0.633026	1.89908
7	7	11.61	175	976	984	980	8	6.5	28.3	0.7	30	76.32	12	1	2.49412	10.8817	81.3535	0.633026	1.66486
1	7	7.4	150	897.5	905.8	901.65	8.3	5.7	31.5	0.763	22	76.74	12.5	1	1.98933	13.1248	86.838	0.792561	0.610272
2	7	7.4	150	897.5	905.8	901.65	8.3	5.7	31.5	0.763	22	76.74	12.5	1	1.98933	13.1248	86.838	0.792561	0.00792561
3	7	7.4	150	897.5	905.8	901.65	8.3	5.7	31.5	0.763	22	76.74	12.5	1	1.98933	13.1248	86.838	0.792561	8.17131
4	7	7.4	150	897.5	905.8	901.65	8.3	5.7	31.5	0.763	22	76.74	12.5	1	1.98933	13.1248	86.838	0.792561	5.34979
5	7	7.4	150	897.5	905.8	901.65	8.3	5.7	31.5	0.763	22	76.74	12.5	1	1.98933	13.1248	86.838	0.792561	4.1768
6	7	7.4	150	897.5	905.8	901.65	8.3	5.7	31.5	0.763	22	76.74	12.5	1	1.98933	13.1248	86.838	0.792561	9.98627
7	7	7.4	150	897.5	905.8	901.65	8.3	5.7	31.5	0.763	22	76.74	12.5	1	1.98933	13.1248	86.838	0.792561	12.9108
8	7	7.4	150	897.5	905.8	901.65	8.3	5.7	31.5	0.763	22	76.74	12.5	1	1.98933	13.1248	86.838	0.792561	9.97834
9	7	7.4	150	897.5	905.8	901.65	8.3	5.7	31.5	0.763	22	76.74	12.5	1	1.98933	13.1248	86.838	0.792561	5.52415
10	7	7.4	150	897.5	905.8	901.65	8.3	5.7	31.5	0.763	22	76.74	12.5	1	1.98933	13.1248	86.838	0.792561	0.990701
11	7	7.4	150	897.5	905.8	901.65	8.3	5.7	31.5	0.763	22	76.74	12.5	1	1.98933	13.1248	86.838	0.792561	1.56135
1	7	9.86	150	886.3	894.2	890.25	7.9	3.4	31.3	0.859	24	96.02	15	1	0.662464	17.0512	96.2602	0.480046	0.537652
2	7	9.86	150	886.3	894.2	890.25	7.9	3.4	31.3	0.859	24	96.02	15	1	0.662464	17.0512	96.2602	0.480046	0.436842
3	7	9.86	150	886.3	894.2	890.25	7.9	3.4	31.3	0.859	24	96.02	15	1	0.662464	17.0512	96.2602	0.480046	0.288028
4	7	9.86	150	886.3	894.2	890.25	7.9	3.4	31.3	0.859	24	96.02	15	1	0.662464	17.0512	96.2602	0.480046	0.259225
5	7	9.86	150	886.3	894.2	890.25	7.9	3.4	31.3	0.859	24	96.02	15	1	0.662464	17.0512	96.2602	0.480046	0.0816078
1	7	9.55	150	987.6	994.6	991.1	7	5.5	31.4	0.542	0	71.42	11.5	1	0.473543	14.9491	96.9296	0.464258	0.088209
2	7	9.55	150	987.6	994.6	991.1	7	5.5	31.4	0.542	0	71.42	11.5	1	0.473543	14.9491	96.9296	0.464258	0.111422
3	7	9.55	150	987.6	994.6	991.1	7	5.5	31.4	0.542	0	71.42	11.5	1	0.473543	14.9491	96.9296	0.464258	0.139277
4	7	9.55	150	987.6	994.6	991.1	7	5.5	31.4	0.542	0	71.42	11.5	1	0.473543	14.9491	96.9296	0.464258	0.0417832
5	7	9.55	150	987.6	994.6	991.1	7	5.5	31.4	0.542	0	71.42	11.5	1	0.473543	14.9491	96.9296	0.464258	0.088209
6	7	9.55	150	987.6	994.6	991.1	7	5.5	31.4	0.542	0	71.42	11.5	1	0.473543	14.9491	96.9296	0.464258	0.362121
7	7	9.55	150	987.6	994.6	991.1	7	5.5	31.4	0.542	0	71.42	11.5	1	0.473543	14.9491	96.9296	0.464258	0.12535
8	7	9.55	150	987.6	994.6	991.1	7	5.5	31.4	0.542	0	71.42	11.5	1	0.473543	14.9491	96.9296	0.464258	0.357479
9	7	9.55	150	987.6	994.6	991.1	7	5.5	31.4	0.542	0	71.42	11.5	1	0.473543	14.9491	96.9296	0.464258	0.733527
10	7	9.55	150	987.6	994.6	991.1	7	5.5	31.4	0.542	0	71.42	11.5	1	0.473543	14.9491	96.9296	0.464258	0.218201
1	7	9.3	150	969.4	974.8	972.1	5.4	5.2	31.6	0.582	31	59.38	9.5	1	1.22299	10.7879	89.8177	0.377465	0.283099
2	7	9.3	150	969.4	974.8	972.1	5.4	5.2	31.6	0.582	31	59.38	9.5	1	1.22299	10.7879	89.8177	0.377465	0.275549
3	7	9.3	150	969.4	974.8	972.1	5.4	5.2	31.6	0.582	31	59.38	9.5	1	1.22299	10.7879	89.8177	0.377465	0.441634
4	7	9.3	150	969.4	974.8	972.1	5.4	5.2	31.6	0.582	31	59.38	9.5	1	1.22299	10.7879	89.8177	0.377465	4.68056
5	7	9.3	150	969.4	974.8	972.1	5.4	5.2	31.6	0.582	31	59.38	9.5	1	1.22299	10.7879	89.8177	0.377465	2.38558
6	7	9.3	150	969.4	974.8	972.1	5.4	5.2	31.6	0.582	31	59.38	9.5	1	1.22299	10.7879	89.8177	0.377465	3.4689
7	7	9.3	150	969.4	974.8	972.1	5.4	5.2	31.6	0.582	31	59.38	9.5	1	1.22299	10.7879	89.8177	0.377465	2.98952
8	7	9.3	150	969.4	974.8	972.1	5.4	5.2	31.6	0.582	31	59.38	9.5	1	1.22299	10.7879	89.8177	0.377465	1.6533
9	7	9.3	150	969.4	974.8	972.1	5.4	5.2	31.6	0.582	31	59.38	9.5	1	1.22299	10.7879	89.8177	0.377465	2.24214
10	7	9.3	150	969.4	974.8	972.1	5.4	5.2	31.6	0.582	31	59.38	9.5	1	1.22299	10.7879	89.8177	0.377465	1.3853
11	7	9.3	150	969.4	974.8	972.1	5.4	5.2	31.6	0.582	31	59.38	9.5	1	1.22299	10.7879	89.8177	0.377465	1.51363
1	7	9.33	125	944.4	957.7	951.05	11.9	10.8	31.7	1.158	37	59.2	8.5	1	2.76646	20.9921	88.3559	0.82581	4.79796
2	7	9.33	125	944.4	957.7	951.05	11.9	10.8	31.7	1.158	37	59.2	8.5	1	2.76646	20.9921	88.3559	0.82581	5.3017
3	7	9.33	125	944.4	957.7	951.05	11.9	10.8	31.7	1.158	37	59.2	8.5	1	2.76646	20.9921	88.3559	0.82581	5.22738
4	7	9.33	125	944.4	957.7	951.05	11.9	10.8	31.7	1.158	37	59.2	8.5	1	2.76646	20.9921	88.3559	0.82581	4.88054
5	7	9.33	125	944.4	957.7	951.05	11.9	10.8	31.7	1.158	37	59.2	8.5	1	2.76646	20.9921	88.3559	0.82581	5.98712
6	7	9.33	125	944.4	957.7	951.05	11.9	10.8	31.7	1.158	37	59.2	8.5	1	2.76646	20.9921	88.3559	0.82581	5.67332
7	7	9.33	125	944.4	957.7	951.05	11.9	10.8	31.7	1.158	37	59.2	8.5	1	2.76646	20.9921	88.3559	0.82581	6.88726
8	7	9.33	125	944.4	957.7	951.05	11.9	10.8	31.7	1.158	37	59.2	8.5	1	2.76646	20.9921	88.3559	0.82581	7.63049
1	7	8.94	175	992.1	998.3	995.2	5.2	4.1	31.7	0.345	42	403.1	55	1	1.6959	33.7127	95.2105	0.526678	3.70255
2	7	8.94	175	992.1	998.3	995.2	5.2	4.1	31.7	0.345	42	403.1	55	1	1.6959	33.7127	95.2105	0.526678	4.21869
3	7	8.94	175	992.1	998.3	995.2	5.2	4.1	31.7	0.345	42	403.1	55	1	1.6959	33.7127	95.2105	0.526678	2.64919
4	7	8.94	175	992.1	998.3	995.2	5.2	4.1	31.7	0.345	42	403.1	55	1	1.6959	33.7127	95.2105	0.526678	1.12709
5	7	8.94	175	992.1	998.3	995.2	5.2	4.1	31.7	0.345	42	403.1	55	1	1.6959	33.7127	95.2105	0.526678	0.60568
6	7	8.94	175	992.1	998.3	995.2	5.2	4.1	31.7	0.345	42	403.1	55	1	1.6959	33.7127	95.2105	0.526678	1.22716
7	7	8.94	175	992.1	998.3	995.2	5.2	4.1	31.7	0.345	42	403.1	55	1	1.6959	33.7127	95.2105	0.526678	0.363408
8	7	8.94	175	992.1	998.3	995.2	5.2	4.1	31.7	0.345	42	403.1	55	1	1.6959	33.7127	95.2105	0.526678	1.31143
9	7	8.94	175	992.1	998.3	995.2	5.2	4.1	31.7	0.345	42	403.1	55	1	1.6959	33.7127	95.2105	0.526678	1.00069
10	7	8.94	175	992.1	998.3	995.2	5.2	4.1	31.7	0.345	42	403.1	55	1	1.6959	33.7127	95.2105	0.526678	2.00664
1	7	8.94	175	998.8	1005.7	1002.25	6.6	5.6	31.1	0.227	38	743.6	100	2	1.5241	30.2973	95.2105	0.473322	3.32745
2	7	8.94	175	998.8	1005.7	1002.25	6.6	5.6	31.1	0.227	38	743.6	100	2	1.5241	30.2973	95.2105	0.473322	3.79131
3	7	8.94	175	998.8	1005.7	1002.25	6.6	5.6	31.1	0.227	38	743.6	100	2	1.5241	30.2973	95.2105	0.473322	2.38081
4	7	8.94	175	998.8	1005.7	1002.25	6.6	5.6	31.1	0.227	38	743.6	100	2	1.5241	30.2973	95.2105	0.473322	1.01291
5	7	8.94	175	998.8	1005.7	1002.25	6.6	5.6	31.1	0.227	38	743.6	100	2	1.5241	30.2973	95.2105	0.473322	0.54432
6	7	8.94	175	998.8	1005.7	1002.25	6.6	5.6	31.1	0.227	38	743.6	100	2	1.5241	30.2973	95.2105	0.473322	1.10284
7	7	8.94	175	998.8	1005.7	1002.25	6.6	5.6	31.1	0.227	38	743.6	100	2	1.5241	30.2973	95.2105	0.473322	0.326592
8	7	8.94	175	998.8	1005.7	1002.25	6.6	5.6	31.1	0.227	38	743.6	100	2	1.5241	30.2973	95.2105	0.473322	1.17857
9	7	8.94	175	998.8	1005.7	1002.25	6.6	5.6	31.1	0.227	38	743.6	100	2	1.5241	30.2973	95.2105	0.473322	0.899311
10	7	8.94	175	998.8	1005.7	1002.25	6.6	5.6	31.1	0.227	38	743.6	100	2	1.5241	30.2973	95.2105	0.473322	1.80336
1	7	8.94	175	977.4	982.7	980.05	3.7	1.8	32.2	1.333	30	270	40	1	0.512281	32.0346	98.426	0.310473	0.950048
2	7	8.94	175	977.4	982.7	980.05	3.7	1.8	32.2	1.333	30	270	40	1	0.512281	32.0346	98.426	0.310473	1.34745
3	7	8.94	175	977.4	982.7	980.05	3.7	1.8	32.2	1.333	30	270	40	1	0.512281	32.0346	98.426	0.310473	0.965572
4	7	8.94	175	977.4	982.7	980.05	3.7	1.8	32.2	1.333	30	270	40	1	0.512281	32.0346	98.426	0.310473	0.217331
5	7	8.94	175	977.4	982.7	980.05	3.7	1.8	32.2	1.333	30	270	40	1	0.512281	32.0346	98.426	0.310473	0.0683041
6	7	8.94	175	977.4	982.7	980.05	3.7	1.8	32.2	1.333	30	270	40	1	0.512281	32.0346	98.426	0.310473	0.0434663
1	7	8.94	175	983.8	989.1	986.45	5.6	4.8	31.7	1.096	26	280	40	1	1.1232	70.2375	98.426	0.680728	2.08303
2	7	8.94	175	983.8	989.1	986.45	5.6	4.8	31.7	1.096	26	280	40	1	1.1232	70.2375	98.426	0.680728	2.95436
3	7	8.94	175	983.8	989.1	986.45	5.6	4.8	31.7	1.096	26	280	40	1	1.1232	70.2375	98.426	0.680728	2.11706
4	7	8.94	175	983.8	989.1	986.45	5.6	4.8	31.7	1.096	26	280	40	1	1.1232	70.2375	98.426	0.680728	0.476509
5	7	8.94	175	983.8	989.1	986.45	5.6	4.8	31.7	1.096	26	280	40	1	1.1232	70.2375	98.426	0.680728	0.14976
6	7	8.94	175	983.8	989.1	986.45	5.6	4.8	31.7	1.096	26	280	40	1	1.1232	70.2375	98.426	0.680728	0.0953019
1	7	10.62	150	1158	1163.2	1160.6	4.6	4.5	28.5	0.519	35	143.32	23	2	0.342246	22.2378	98.4843	0.81487	3.40616
2	7	10.62	150	1158	1163.2	1160.6	4.6	4.5	28.5	0.519	35	143.32	23	2	0.342246	22.2378	98.4843	0.81487	2.04532
3	7	10.62	150	1158	1163.2	1160.6	4.6	4.5	28.5	0.519	35	143.32	23	2	0.342246	22.2378	98.4843	0.81487	1.92309
4	7	10.62	150	1158	1163.2	1160.6	4.6	4.5	28.5	0.519	35	143.32	23	2	0.342246	22.2378	98.4843	0.81487	2.192
5	7	10.62	150	1158	1163.2	1160.6	4.6	4.5	28.5	0.519	35	143.32	23	2	0.342246	22.2378	98.4843	0.81487	1.46677
6	7	10.62	150	1158	1163.2	1160.6	4.6	4.5	28.5	0.519	35	143.32	23	2	0.342246	22.2378	98.4843	0.81487	2.11866
7	7	10.62	150	1158	1163.2	1160.6	4.6	4.5	28.5	0.519	35	143.32	23	2	0.342246	22.2378	98.4843	0.81487	1.33639
8	7	10.62	150	1158	1163.2	1160.6	4.6	4.5	28.5	0.519	35	143.32	23	2	0.342246	22.2378	98.4843	0.81487	2.11866
9	7	10.62	150	1158	1163.2	1160.6	4.6	4.5	28.5	0.519	35	143.32	23	2	0.342246	22.2378	98.4843	0.81487	2.2246
10	7	10.62	150	1158	1163.2	1160.6	4.6	4.5	28.5	0.519	35	143.32	23	2	0.342246	22.2378	98.4843	0.81487	0.513368
1	7	8.94	175	972.8	976.3	974.55	2.4	1.6	32.6	0.543	23	380	50	1	2.92957	51.3321	94.601	0.538524	1.18475
2	7	8.94	175	972.8	976.3	974.55	2.4	1.6	32.6	0.543	23	380	50	1	2.92957	51.3321	94.601	0.538524	1.74482
3	7	8.94	175	972.8	976.3	974.55	2.4	1.6	32.6	0.543	23	380	50	1	2.92957	51.3321	94.601	0.538524	1.07166
4	7	8.94	175	972.8	976.3	974.55	2.4	1.6	32.6	0.543	23	380	50	1	2.92957	51.3321	94.601	0.538524	1.74482
5	7	8.94	175	972.8	976.3	974.55	2.4	1.6	32.6	0.543	23	380	50	1	2.92957	51.3321	94.601	0.538524	1.58326
6	7	8.94	175	972.8	976.3	974.55	2.4	1.6	32.6	0.543	23	380	50	1	2.92957	51.3321	94.601	0.538524	1.52941
7	7	8.94	175	972.8	976.3	974.55	2.4	1.6	32.6	0.543	23	380	50	1	2.92957	51.3321	94.601	0.538524	0.786244
8	7	8.94	175	972.8	976.3	974.55	2.4	1.6	32.6	0.543	23	380	50	1	2.92957	51.3321	94.601	0.538524	0.269262
1	7	8.94	175	978.5	982.4	980.45	3.9	1.8	31.9	0.325	26	375	50	1	1.9726	34.5641	94.601	0.362611	0.797744
2	7	8.94	175	978.5	982.4	980.45	3.9	1.8	31.9	0.325	26	375	50	1	1.9726	34.5641	94.601	0.362611	1.17486
3	7	8.94	175	978.5	982.4	980.45	3.9	1.8	31.9	0.325	26	375	50	1	1.9726	34.5641	94.601	0.362611	0.721595
4	7	8.94	175	978.5	982.4	980.45	3.9	1.8	31.9	0.325	26	375	50	1	1.9726	34.5641	94.601	0.362611	1.17486
5	7	8.94	175	978.5	982.4	980.45	3.9	1.8	31.9	0.325	26	375	50	1	1.9726	34.5641	94.601	0.362611	1.06608
6	7	8.94	175	978.5	982.4	980.45	3.9	1.8	31.9	0.325	26	375	50	1	1.9726	34.5641	94.601	0.362611	1.02981
7	7	8.94	175	978.5	982.4	980.45	3.9	1.8	31.9	0.325	26	375	50	1	1.9726	34.5641	94.601	0.362611	0.529412
8	7	8.94	175	978.5	982.4	980.45	3.9	1.8	31.9	0.325	26	375	50	1	1.9726	34.5641	94.601	0.362611	0.181305
1	7	8.94	175	984.2	987	985.6	2.4	1.1	30.9	0.145	30	760	100	2	0.537829	9.42388	94.601	0.0988657	0.217504
2	7	8.94	175	984.2	987	985.6	2.4	1.1	30.9	0.145	30	760	100	2	0.537829	9.42388	94.601	0.0988657	0.320325
3	7	8.94	175	984.2	987	985.6	2.4	1.1	30.9	0.145	30	760	100	2	0.537829	9.42388	94.601	0.0988657	0.196743
4	7	8.94	175	984.2	987	985.6	2.4	1.1	30.9	0.145	30	760	100	2	0.537829	9.42388	94.601	0.0988657	0.320325
5	7	8.94	175	984.2	987	985.6	2.4	1.1	30.9	0.145	30	760	100	2	0.537829	9.42388	94.601	0.0988657	0.290665
6	7	8.94	175	984.2	987	985.6	2.4	1.1	30.9	0.145	30	760	100	2	0.537829	9.42388	94.601	0.0988657	0.280779
7	7	8.94	175	984.2	987	985.6	2.4	1.1	30.9	0.145	30	760	100	2	0.537829	9.42388	94.601	0.0988657	0.144344
8	7	8.94	175	984.2	987	985.6	2.4	1.1	30.9	0.145	30	760	100	2	0.537829	9.42388	94.601	0.0988657	0.0494328
1	7	8.87	150	1110.7	1116.8	1113.75	6.1	4.7	30.1	0.495	30	73.62	11.5	1	0.174886	20.6949	99.162	0.728694	0.255043
2	7	8.87	150	1110.7	1116.8	1113.75	6.1	4.7	30.1	0.495	30	73.62	11.5	1	0.174886	20.6949	99.162	0.728694	0.422642
3	7	8.87	150	1110.7	1116.8	1113.75	6.1	4.7	30.1	0.495	30	73.62	11.5	1	0.174886	20.6949	99.162	0.728694	0.510086
4	7	8.87	150	1110.7	1116.8	1113.75	6.1	4.7	30.1	0.495	30	73.62	11.5	1	0.174886	20.6949	99.162	0.728694	0.728694
5	7	8.87	150	1110.7	1116.8	1113.75	6.1	4.7	30.1	0.495	30	73.62	11.5	1	0.174886	20.6949	99.162	0.728694	0.247756
6	7	8.87	150	1110.7	1116.8	1113.75	6.1	4.7	30.1	0.495	30	73.62	11.5	1	0.174886	20.6949	99.162	0.728694	0.276904
1	7	9.3	150	997.8	1005.5	1001.65	7.7	5.2	28.3	0.516	24	53.04	8.5	1	2.38633	37.9047	94.0773	0.790176	0.434597
2	7	9.3	150	997.8	1005.5	1001.65	7.7	5.2	28.3	0.516	24	53.04	8.5	1	2.38633	37.9047	94.0773	0.790176	1.19317
3	7	9.3	150	997.8	1005.5	1001.65	7.7	5.2	28.3	0.516	24	53.04	8.5	1	2.38633	37.9047	94.0773	0.790176	0.940309
4	7	9.3	150	997.8	1005.5	1001.65	7.7	5.2	28.3	0.516	24	53.04	8.5	1	2.38633	37.9047	94.0773	0.790176	0.53732
5	7	9.3	150	997.8	1005.5	1001.65	7.7	5.2	28.3	0.516	24	53.04	8.5	1	2.38633	37.9047	94.0773	0.790176	0.964014
6	7	9.3	150	997.8	1005.5	1001.65	7.7	5.2	28.3	0.516	24	53.04	8.5	1	2.38633	37.9047	94.0773	0.790176	0.371383
1	7	10.99	175	954.1	957.8	955.95	3.7	1.6	32.7	0.896	35	403	50	1	1.82683	68.4469	97.4004	0.657132	2.16197
2	7	10.99	175	954.1	957.8	955.95	3.7	1.6	32.7	0.896	35	403	50	1	1.82683	68.4469	97.4004	0.657132	3.30538
3	7	10.99	175	954.1	957.8	955.95	3.7	1.6	32.7	0.896	35	403	50	1	1.82683	68.4469	97.4004	0.657132	2.62853
4	7	10.99	175	954.1	957.8	955.95	3.7	1.6	32.7	0.896	35	403	50	1	1.82683	68.4469	97.4004	0.657132	2.60224
5	7	10.99	175	954.1	957.8	955.95	3.7	1.6	32.7	0.896	35	403	50	1	1.82683	68.4469	97.4004	0.657132	2.21454
6	7	10.99	175	954.1	957.8	955.95	3.7	1.6	32.7	0.896	35	403	50	1	1.82683	68.4469	97.4004	0.657132	2.53653
7	7	10.99	175	954.1	957.8	955.95	3.7	1.6	32.7	0.896	35	403	50	1	1.82683	68.4469	97.4004	0.657132	2.72053
8	7	10.99	175	954.1	957.8	955.95	3.7	1.6	32.7	0.896	35	403	50	1	1.82683	68.4469	97.4004	0.657132	0.939699
9	7	10.99	175	954.1	957.8	955.95	3.7	1.6	32.7	0.896	35	403	50	1	1.82683	68.4469	97.4004	0.657132	1.39969
10	7	10.99	175	954.1	957.8	955.95	3.7	1.6	32.7	0.896	35	403	50	1	1.82683	68.4469	97.4004	0.657132	1.41941
11	7	10.99	175	954.1	957.8	955.95	3.7	1.6	32.7	0.896	35	403	50	1	1.82683	68.4469	97.4004	0.657132	0.367994
1	7	10.35	175	930.6	935.7	933.15	5.1	4.2	32.4	0.735	26	55.92	8.5	1	1.05384	10.401	90.8	0.763655	3.29135
2	7	10.35	175	930.6	935.7	933.15	5.1	4.2	32.4	0.735	26	55.92	8.5	1	1.05384	10.401	90.8	0.763655	1.38222
3	7	10.35	175	930.6	935.7	933.15	5.1	4.2	32.4	0.735	26	55.92	8.5	1	1.05384	10.401	90.8	0.763655	2.88662
4	7	10.35	175	930.6	935.7	933.15	5.1	4.2	32.4	0.735	26	55.92	8.5	1	1.05384	10.401	90.8	0.763655	3.28372
5	7	10.35	175	930.6	935.7	933.15	5.1	4.2	32.4	0.735	26	55.92	8.5	1	1.05384	10.401	90.8	0.763655	2.22224
6	7	10.35	175	930.6	935.7	933.15	5.1	4.2	32.4	0.735	26	55.92	8.5	1	1.05384	10.401	90.8	0.763655	1.30585
7	7	10.35	175	930.6	935.7	933.15	5.1	4.2	32.4	0.735	26	55.92	8.5	1	1.05384	10.401	90.8	0.763655	2.53534
8	7	10.35	175	930.6	935.7	933.15	5.1	4.2	32.4	0.735	26	55.92	8.5	1	1.05384	10.401	90.8	0.763655	1.63422
9	7	10.35	175	930.6	935.7	933.15	5.1	4.2	32.4	0.735	26	55.92	8.5	1	1.05384	10.401	90.8	0.763655	1.99314
10	7	10.35	175	930.6	935.7	933.15	5.1	4.2	32.4	0.735	26	55.92	8.5	1	1.05384	10.401	90.8	0.763655	1.37458
11	7	10.35	175	930.6	935.7	933.15	5.1	4.2	32.4	0.735	26	55.92	8.5	1	1.05384	10.401	90.8	0.763655	0.870567
12	7	10.35	175	930.6	935.7	933.15	5.1	4.2	32.4	0.735	26	55.92	8.5	1	1.05384	10.401	90.8	0.763655	1.53495
1	7	9.96	175	968.6	973.6	971.1	5	4.8	32.2	1.221	33	410	52	1	0	0	0	0.910161	8.51001
2	7	9.96	175	968.6	973.6	971.1	5	4.8	32.2	1.221	33	410	52	1	0	0	0	0.910161	8.21875
3	7	9.96	175	968.6	973.6	971.1	5	4.8	32.2	1.221	33	410	52	1	0	0	0	0.910161	5.6521
4	7	9.96	175	968.6	973.6	971.1	5	4.8	32.2	1.221	33	410	52	1	0	0	0	0.910161	4.93307
5	7	9.96	175	968.6	973.6	971.1	5	4.8	32.2	1.221	33	410	52	1	0	0	0	0.910161	3.50412
6	7	9.96	175	968.6	973.6	971.1	5	4.8	32.2	1.221	33	410	52	1	0	0	0	0.910161	2.30271
7	7	9.96	175	968.6	973.6	971.1	5	4.8	32.2	1.221	33	410	52	1	0	0	0	0.910161	2.03876
8	7	9.96	175	968.6	973.6	971.1	5	4.8	32.2	1.221	33	410	52	1	0	0	0	0.910161	1.75661
9	7	9.96	175	968.6	973.6	971.1	5	4.8	32.2	1.221	33	410	52	1	0	0	0	0.910161	1.41985
10	7	9.96	175	968.6	973.6	971.1	5	4.8	32.2	1.221	33	410	52	1	0	0	0	0.910161	0.79184
11	7	9.96	175	968.6	973.6	971.1	5	4.8	32.2	1.221	33	410	52	1	0	0	0	0.910161	0.427776
12	7	9.96	175	968.6	973.6	971.1	5	4.8	32.2	1.221	33	410	52	1	0	0	0	0.910161	0.409572
1	7	10.72	175	1006.5	1015.2	1010.85	8.7	7.8	29	0.7	33	91.64	15	1	0	0	0	0.43128	3.65294
2	7	10.72	175	1006.5	1015.2	1010.85	8.7	7.8	29	0.7	33	91.64	15	1	0	0	0	0.43128	3.36398
3	7	10.72	175	1006.5	1015.2	1010.85	8.7	7.8	29	0.7	33	91.64	15	1	0	0	0	0.43128	3.31654
4	7	10.72	175	1006.5	1015.2	1010.85	8.7	7.8	29	0.7	33	91.64	15	1	0	0	0	0.43128	2.92408
5	7	10.72	175	1006.5	1015.2	1010.85	8.7	7.8	29	0.7	33	91.64	15	1	0	0	0	0.43128	2.41085
6	7	10.72	175	1006.5	1015.2	1010.85	8.7	7.8	29	0.7	33	91.64	15	1	0	0	0	0.43128	2.25559
7	7	10.72	175	1006.5	1015.2	1010.85	8.7	7.8	29	0.7	33	91.64	15	1	0	0	0	0.43128	1.9882
8	7	10.72	175	1006.5	1015.2	1010.85	8.7	7.8	29	0.7	33	91.64	15	1	0	0	0	0.43128	2.32028
9	7	10.72	175	1006.5	1015.2	1010.85	8.7	7.8	29	0.7	33	91.64	15	1	0	0	0	0.43128	2.66962
10	7	10.72	175	1006.5	1015.2	1010.85	8.7	7.8	29	0.7	33	91.64	15	1	0	0	0	0.43128	2.66962
11	7	10.72	175	1006.5	1015.2	1010.85	8.7	7.8	29	0.7	33	91.64	15	1	0	0	0	0.43128	2.29872
12	7	10.72	175	1006.5	1015.2	1010.85	8.7	7.8	29	0.7	33	91.64	15	1	0	0	0	0.43128	2.02701
1	7	6.64	175	953	954.2	953.6	1.2	0.9	31.5	0.657	33	385	51.5	1	0.126886	11.4217	98.9013	0.096126	0.405652
2	7	6.64	175	953	954.2	953.6	1.2	0.9	31.5	0.657	33	385	51.5	1	0.126886	11.4217	98.9013	0.096126	0.309526
3	7	6.64	175	953	954.2	953.6	1.2	0.9	31.5	0.657	33	385	51.5	1	0.126886	11.4217	98.9013	0.096126	0.284533
4	7	6.64	175	953	954.2	953.6	1.2	0.9	31.5	0.657	33	385	51.5	1	0.126886	11.4217	98.9013	0.096126	0.347015
5	7	6.64	175	953	954.2	953.6	1.2	0.9	31.5	0.657	33	385	51.5	1	0.126886	11.4217	98.9013	0.096126	0.495049
6	7	6.64	175	953	954.2	953.6	1.2	0.9	31.5	0.657	33	385	51.5	1	0.126886	11.4217	98.9013	0.096126	0.512352
7	7	6.64	175	953	954.2	953.6	1.2	0.9	31.5	0.657	33	385	51.5	1	0.126886	11.4217	98.9013	0.096126	0.601749
8	7	6.64	175	953	954.2	953.6	1.2	0.9	31.5	0.657	33	385	51.5	1	0.126886	11.4217	98.9013	0.096126	0.508507
9	7	6.64	175	953	954.2	953.6	1.2	0.9	31.5	0.657	33	385	51.5	1	0.126886	11.4217	98.9013	0.096126	0.330674
1	7	6.64	175	960.4	968.5	964.45	8.1	3.8	32.2	1.231	28	490	63	2	1.0038	90.3575	98.9013	0.760457	3.20913
2	7	6.64	175	960.4	968.5	964.45	8.1	3.8	32.2	1.231	28	490	63	2	1.0038	90.3575	98.9013	0.760457	2.44867
3	7	6.64	175	960.4	968.5	964.45	8.1	3.8	32.2	1.231	28	490	63	2	1.0038	90.3575	98.9013	0.760457	2.25095
4	7	6.64	175	960.4	968.5	964.45	8.1	3.8	32.2	1.231	28	490	63	2	1.0038	90.3575	98.9013	0.760457	2.74525
5	7	6.64	175	960.4	968.5	964.45	8.1	3.8	32.2	1.231	28	490	63	2	1.0038	90.3575	98.9013	0.760457	3.91635
6	7	6.64	175	960.4	968.5	964.45	8.1	3.8	32.2	1.231	28	490	63	2	1.0038	90.3575	98.9013	0.760457	4.05324
7	7	6.64	175	960.4	968.5	964.45	8.1	3.8	32.2	1.231	28	490	63	2	1.0038	90.3575	98.9013	0.760457	4.76046
8	7	6.64	175	960.4	968.5	964.45	8.1	3.8	32.2	1.231	28	490	63	2	1.0038	90.3575	98.9013	0.760457	4.02282
9	7	6.64	175	960.4	968.5	964.45	8.1	3.8	32.2	1.231	28	490	63	2	1.0038	90.3575	98.9013	0.760457	2.61597
1	7	6.64	175	969.1	974.2	971.65	4	2.2	30.5	0.401	28	730	103	2	0.18931	17.0408	98.9013	0.143417	0.605219
2	7	6.64	175	969.1	974.2	971.65	4	2.2	30.5	0.401	28	730	103	2	0.18931	17.0408	98.9013	0.143417	0.461802
3	7	6.64	175	969.1	974.2	971.65	4	2.2	30.5	0.401	28	730	103	2	0.18931	17.0408	98.9013	0.143417	0.424514
4	7	6.64	175	969.1	974.2	971.65	4	2.2	30.5	0.401	28	730	103	2	0.18931	17.0408	98.9013	0.143417	0.517735
5	7	6.64	175	969.1	974.2	971.65	4	2.2	30.5	0.401	28	730	103	2	0.18931	17.0408	98.9013	0.143417	0.738597
6	7	6.64	175	969.1	974.2	971.65	4	2.2	30.5	0.401	28	730	103	2	0.18931	17.0408	98.9013	0.143417	0.764412
7	7	6.64	175	969.1	974.2	971.65	4	2.2	30.5	0.401	28	730	103	2	0.18931	17.0408	98.9013	0.143417	0.897789
8	7	6.64	175	969.1	974.2	971.65	4	2.2	30.5	0.401	28	730	103	2	0.18931	17.0408	98.9013	0.143417	0.758675
9	7	6.64	175	969.1	974.2	971.65	4	2.2	30.5	0.401	28	730	103	2	0.18931	17.0408	98.9013	0.143417	0.493354
4	7	9.09	125	949.5	959.4	954.45	8.7	6.4	30.2	1.135	24	50.7	8.5	1	1.17772	15.2645	92.8372	0.764752	0.107065
5	7	9.09	125	949.5	959.4	954.45	8.7	6.4	30.2	1.135	24	50.7	8.5	1	1.17772	15.2645	92.8372	0.764752	1.27714
6	7	9.09	125	949.5	959.4	954.45	8.7	6.4	30.2	1.135	24	50.7	8.5	1	1.17772	15.2645	92.8372	0.764752	0.95594
7	7	9.09	125	949.5	959.4	954.45	8.7	6.4	30.2	1.135	24	50.7	8.5	1	1.17772	15.2645	92.8372	0.764752	0.841228
8	7	9.09	125	949.5	959.4	954.45	8.7	6.4	30.2	1.135	24	50.7	8.5	1	1.17772	15.2645	92.8372	0.764752	0.80299
9	7	9.09	125	949.5	959.4	954.45	8.7	6.4	30.2	1.135	24	50.7	8.5	1	1.17772	15.2645	92.8372	0.764752	0.520032
10	7	9.09	125	949.5	959.4	954.45	8.7	6.4	30.2	1.135	24	50.7	8.5	1	1.17772	15.2645	92.8372	0.764752	0.932998
11	7	9.09	125	949.5	959.4	954.45	8.7	6.4	30.2	1.135	24	50.7	8.5	1	1.17772	15.2645	92.8372	0.764752	0.86417
12	7	9.09	125	949.5	959.4	954.45	8.7	6.4	30.2	1.135	24	50.7	8.5	1	1.17772	15.2645	92.8372	0.764752	0.726515
1	7	11.67	150	1058.8	1074.5	1066.65	4.7	3.3	30.5	0.5	27	176.4	29	2	1.53653	25.7744	94.3739	0.787966	2.76576
2	7	11.67	150	1058.8	1074.5	1066.65	4.7	3.3	30.5	0.5	27	176.4	29	2	1.53653	25.7744	94.3739	0.787966	3.42765
3	7	11.67	150	1058.8	1074.5	1066.65	4.7	3.3	30.5	0.5	27	176.4	29	2	1.53653	25.7744	94.3739	0.787966	3.16762
4	7	11.67	150	1058.8	1074.5	1066.65	4.7	3.3	30.5	0.5	27	176.4	29	2	1.53653	25.7744	94.3739	0.787966	3.1755
5	7	11.67	150	1058.8	1074.5	1066.65	4.7	3.3	30.5	0.5	27	176.4	29	2	1.53653	25.7744	94.3739	0.787966	4.80659
6	7	11.67	150	1058.8	1074.5	1066.65	4.7	3.3	30.5	0.5	27	176.4	29	2	1.53653	25.7744	94.3739	0.787966	4.70415
7	7	11.67	150	1058.8	1074.5	1066.65	4.7	3.3	30.5	0.5	27	176.4	29	2	1.53653	25.7744	94.3739	0.787966	3.95559
8	7	11.67	150	1058.8	1074.5	1066.65	4.7	3.3	30.5	0.5	27	176.4	29	2	1.53653	25.7744	94.3739	0.787966	4.31017
9	7	11.67	150	1058.8	1074.5	1066.65	4.7	3.3	30.5	0.5	27	176.4	29	2	1.53653	25.7744	94.3739	0.787966	3.70344
10	7	11.67	150	1058.8	1074.5	1066.65	4.7	3.3	30.5	0.5	27	176.4	29	2	1.53653	25.7744	94.3739	0.787966	2.70272
11	7	11.67	150	1058.8	1074.5	1066.65	4.7	3.3	30.5	0.5	27	176.4	29	2	1.53653	25.7744	94.3739	0.787966	2.45845
1	7	11.2	125	915	927.5	921.25	10.8	8	31.6	0.88	25	140	23	2	0	0	0	0.836979	2.27658
2	7	11.2	125	915	927.5	921.25	10.8	8	31.6	0.88	25	140	23	2	0	0	0	0.836979	2.41887
3	7	11.2	125	915	927.5	921.25	10.8	8	31.6	0.88	25	140	23	2	0	0	0	0.836979	4.21001
4	7	11.2	125	915	927.5	921.25	10.8	8	31.6	0.88	25	140	23	2	0	0	0	0.836979	4.36066
5	7	11.2	125	915	927.5	921.25	10.8	8	31.6	0.88	25	140	23	2	0	0	0	0.836979	6.24387
6	7	11.2	125	915	927.5	921.25	10.8	8	31.6	0.88	25	140	23	2	0	0	0	0.836979	6.60377
7	7	11.2	125	915	927.5	921.25	10.8	8	31.6	0.88	25	140	23	2	0	0	0	0.836979	7.86761
8	7	11.2	125	915	927.5	921.25	10.8	8	31.6	0.88	25	140	23	2	0	0	0	0.836979	7.54118
9	7	11.2	125	915	927.5	921.25	10.8	8	31.6	0.88	25	140	23	2	0	0	0	0.836979	8.52045
10	7	11.2	125	915	927.5	921.25	10.8	8	31.6	0.88	25	140	23	2	0	0	0	0.836979	9.13144
11	7	11.2	125	915	927.5	921.25	10.8	8	31.6	0.88	25	140	23	2	0	0	0	0.836979	11.0063
12	7	11.2	125	915	927.5	921.25	10.8	8	31.6	0.88	25	140	23	2	0	0	0	0.836979	11.4164
1	7	10.77	175	962.3	966	964.15	3.7	3.1	29.4	0.962	26	88.88	15	1	1.76589	30.6234	94.5479	0.399523	0.507394
2	7	10.77	175	962.3	966	964.15	3.7	3.1	29.4	0.962	26	88.88	15	1	1.76589	30.6234	94.5479	0.399523	1.0068
3	7	10.77	175	962.3	966	964.15	3.7	3.1	29.4	0.962	26	88.88	15	1	1.76589	30.6234	94.5479	0.399523	1.49422
4	7	10.77	175	962.3	966	964.15	3.7	3.1	29.4	0.962	26	88.88	15	1	1.76589	30.6234	94.5479	0.399523	1.4223
5	7	10.77	175	962.3	966	964.15	3.7	3.1	29.4	0.962	26	88.88	15	1	1.76589	30.6234	94.5479	0.399523	0.906917
6	7	10.77	175	962.3	966	964.15	3.7	3.1	29.4	0.962	26	88.88	15	1	1.76589	30.6234	94.5479	0.399523	0.499404
7	7	10.77	175	962.3	966	964.15	3.7	3.1	29.4	0.962	26	88.88	15	1	1.76589	30.6234	94.5479	0.399523	0.491413
8	7	10.77	175	962.3	966	964.15	3.7	3.1	29.4	0.962	26	88.88	15	1	1.76589	30.6234	94.5479	0.399523	0.567323
1	7	11.6	175	931.8	937.9	934.85	6.3	2.7	30.7	1.191	34	237.84	39	2	2.86536	31.1546	91.5774	0.984659	0.502176
2	7	11.6	175	931.8	937.9	934.85	6.3	2.7	30.7	1.191	34	237.84	39	2	2.86536	31.1546	91.5774	0.984659	1.44745
3	7	11.6	175	931.8	937.9	934.85	6.3	2.7	30.7	1.191	34	237.84	39	2	2.86536	31.1546	91.5774	0.984659	0.561256
4	7	11.6	175	931.8	937.9	934.85	6.3	2.7	30.7	1.191	34	237.84	39	2	2.86536	31.1546	91.5774	0.984659	0.89604
5	7	11.6	175	931.8	937.9	934.85	6.3	2.7	30.7	1.191	34	237.84	39	2	2.86536	31.1546	91.5774	0.984659	1.44745
6	7	11.6	175	931.8	937.9	934.85	6.3	2.7	30.7	1.191	34	237.84	39	2	2.86536	31.1546	91.5774	0.984659	2.18594
7	7	11.6	175	931.8	937.9	934.85	6.3	2.7	30.7	1.191	34	237.84	39	2	2.86536	31.1546	91.5774	0.984659	1.40806
8	7	11.6	175	931.8	937.9	934.85	6.3	2.7	30.7	1.191	34	237.84	39	2	2.86536	31.1546	91.5774	0.984659	1.1422
9	7	11.6	175	931.8	937.9	934.85	6.3	2.7	30.7	1.191	34	237.84	39	2	2.86536	31.1546	91.5774	0.984659	0.324938
10	7	11.6	175	931.8	937.9	934.85	6.3	2.7	30.7	1.191	34	237.84	39	2	2.86536	31.1546	91.5774	0.984659	0.551409
11	7	11.6	175	931.8	937.9	934.85	6.3	2.7	30.7	1.191	34	237.84	39	2	2.86536	31.1546	91.5774	0.984659	1.49668
1	7	9.15	150	883.2	891.9	887.55	8.7	8	31.5	1.259	32	94.44	15	1	2.02524	53.9546	96.3822	0.705658	1.91939
2	7	9.15	150	883.2	891.9	887.55	8.7	8	31.5	1.259	32	94.44	15	1	2.02524	53.9546	96.3822	0.705658	1.15728
3	7	9.15	150	883.2	891.9	887.55	8.7	8	31.5	1.259	32	94.44	15	1	2.02524	53.9546	96.3822	0.705658	1.64418
4	7	9.15	150	883.2	891.9	887.55	8.7	8	31.5	1.259	32	94.44	15	1	2.02524	53.9546	96.3822	0.705658	0.705658
5	7	9.15	150	883.2	891.9	887.55	8.7	8	31.5	1.259	32	94.44	15	1	2.02524	53.9546	96.3822	0.705658	0.472791
6	7	9.15	150	883.2	891.9	887.55	8.7	8	31.5	1.259	32	94.44	15	1	2.02524	53.9546	96.3822	0.705658	0.395169
7	7	9.15	150	883.2	891.9	887.55	8.7	8	31.5	1.259	32	94.44	15	1	2.02524	53.9546	96.3822	0.705658	0.275207
1	7	9.05	150	975.7	982.1	978.9	6.4	4.5	32.4	0.687	35	91.4	15	1	1.0397	25.8224	96.1295	0.945182	0.793953
2	7	9.05	150	975.7	982.1	978.9	6.4	4.5	32.4	0.687	35	91.4	15	1	1.0397	25.8224	96.1295	0.945182	0.982989
3	7	9.05	150	975.7	982.1	978.9	6.4	4.5	32.4	0.687	35	91.4	15	1	1.0397	25.8224	96.1295	0.945182	0.586013
4	7	9.05	150	975.7	982.1	978.9	6.4	4.5	32.4	0.687	35	91.4	15	1	1.0397	25.8224	96.1295	0.945182	1.28545
5	7	9.05	150	975.7	982.1	978.9	6.4	4.5	32.4	0.687	35	91.4	15	1	1.0397	25.8224	96.1295	0.945182	0.567109
6	7	9.05	150	975.7	982.1	978.9	6.4	4.5	32.4	0.687	35	91.4	15	1	1.0397	25.8224	96.1295	0.945182	0.00945182
1	7	9.43	125	931.1	940.4	935.75	8	5.9	31.6	0.77	29	282.74	47	2	0.874757	28.9705	97.069	0.940599	0.611389
2	7	9.43	125	931.1	940.4	935.75	8	5.9	31.6	0.77	29	282.74	47	2	0.874757	28.9705	97.069	0.940599	1.18515
3	7	9.43	125	931.1	940.4	935.75	8	5.9	31.6	0.77	29	282.74	47	2	0.874757	28.9705	97.069	0.940599	0.51733
4	7	9.43	125	931.1	940.4	935.75	8	5.9	31.6	0.77	29	282.74	47	2	0.874757	28.9705	97.069	0.940599	0.32921
5	7	9.43	125	931.1	940.4	935.75	8	5.9	31.6	0.77	29	282.74	47	2	0.874757	28.9705	97.069	0.940599	0.545548
1	7	9.54	175	962.8	969	965.9	6.2	5.9	29.6	0.671	0	0	0	1	0	0	0	0.349615	1.19918
2	7	9.54	175	962.8	969	965.9	6.2	5.9	29.6	0.671	0	0	0	1	0	0	0	0.349615	1.52432
3	7	9.54	175	962.8	969	965.9	6.2	5.9	29.6	0.671	0	0	0	1	0	0	0	0.349615	1.02437
4	7	9.54	175	962.8	969	965.9	6.2	5.9	29.6	0.671	0	0	0	1	0	0	0	0.349615	1.06283
5	7	9.54	175	962.8	969	965.9	6.2	5.9	29.6	0.671	0	0	0	1	0	0	0	0.349615	1.02787
6	7	9.54	175	962.8	969	965.9	6.2	5.9	29.6	0.671	0	0	0	1	0	0	0	0.349615	1.12576
7	7	9.54	175	962.8	969	965.9	6.2	5.9	29.6	0.671	0	0	0	1	0	0	0	0.349615	0.947457
8	7	9.54	175	962.8	969	965.9	6.2	5.9	29.6	0.671	0	0	0	1	0	0	0	0.349615	0.769153
9	7	9.54	175	962.8	969	965.9	6.2	5.9	29.6	0.671	0	0	0	1	0	0	0	0.349615	0.636299
10	7	9.54	175	962.8	969	965.9	6.2	5.9	29.6	0.671	0	0	0	1	0	0	0	0.349615	0.797122
11	7	9.54	175	962.8	969	965.9	6.2	5.9	29.6	0.671	0	0	0	1	0	0	0	0.349615	0.905503
12	7	9.54	175	962.8	969	965.9	6.2	5.9	29.6	0.671	0	0	0	1	0	0	0	0.349615	0.933472
1	7	11.78	175	988.4	997.7	993.05	11.3	10.6	31.1	0.807	32	53.28	8.5	1	1.69272	27.0663	94.1141	0.863633	3.03135
2	7	11.78	175	988.4	997.7	993.05	11.3	10.6	31.1	0.807	32	53.28	8.5	1	1.69272	27.0663	94.1141	0.863633	3.04863
3	7	11.78	175	988.4	997.7	993.05	11.3	10.6	31.1	0.807	32	53.28	8.5	1	1.69272	27.0663	94.1141	0.863633	1.43363
4	7	11.78	175	988.4	997.7	993.05	11.3	10.6	31.1	0.807	32	53.28	8.5	1	1.69272	27.0663	94.1141	0.863633	1.5459
5	7	11.78	175	988.4	997.7	993.05	11.3	10.6	31.1	0.807	32	53.28	8.5	1	1.69272	27.0663	94.1141	0.863633	1.58045
6	7	11.78	175	988.4	997.7	993.05	11.3	10.6	31.1	0.807	32	53.28	8.5	1	1.69272	27.0663	94.1141	0.863633	2.69454
7	7	11.78	175	988.4	997.7	993.05	11.3	10.6	31.1	0.807	32	53.28	8.5	1	1.69272	27.0663	94.1141	0.863633	3.02272
8	7	11.78	175	988.4	997.7	993.05	11.3	10.6	31.1	0.807	32	53.28	8.5	1	1.69272	27.0663	94.1141	0.863633	4.18862
9	7	11.78	175	988.4	997.7	993.05	11.3	10.6	31.1	0.807	32	53.28	8.5	1	1.69272	27.0663	94.1141	0.863633	4.81044
10	7	11.78	175	988.4	997.7	993.05	11.3	10.6	31.1	0.807	32	53.28	8.5	1	1.69272	27.0663	94.1141	0.863633	4.0418
11	7	11.78	175	988.4	997.7	993.05	11.3	10.6	31.1	0.807	32	53.28	8.5	1	1.69272	27.0663	94.1141	0.863633	2.97953
12	7	11.78	175	988.4	997.7	993.05	11.3	10.6	31.1	0.807	32	53.28	8.5	1	1.69272	27.0663	94.1141	0.863633	2.59954
1	7	9.23	175	1070.3	1076.3	1073.3	6	5.6	31.5	0.622	31	112.1	20	1	2.32836	37.655	94.1767	0.657729	0.355174
2	7	9.23	175	1070.3	1076.3	1073.3	6	5.6	31.5	0.622	31	112.1	20	1	2.32836	37.655	94.1767	0.657729	1.02606
3	7	9.23	175	1070.3	1076.3	1073.3	6	5.6	31.5	0.622	31	112.1	20	1	2.32836	37.655	94.1767	0.657729	1.84822
4	7	9.23	175	1070.3	1076.3	1073.3	6	5.6	31.5	0.622	31	112.1	20	1	2.32836	37.655	94.1767	0.657729	1.83506
5	7	9.23	175	1070.3	1076.3	1073.3	6	5.6	31.5	0.622	31	112.1	20	1	2.32836	37.655	94.1767	0.657729	1.86795
6	7	9.23	175	1070.3	1076.3	1073.3	6	5.6	31.5	0.622	31	112.1	20	1	2.32836	37.655	94.1767	0.657729	1.32203
7	7	9.23	175	1070.3	1076.3	1073.3	6	5.6	31.5	0.622	31	112.1	20	1	2.32836	37.655	94.1767	0.657729	1.19707
8	7	9.23	175	1070.3	1076.3	1073.3	6	5.6	31.5	0.622	31	112.1	20	1	2.32836	37.655	94.1767	0.657729	1.71667
9	7	9.23	175	1070.3	1076.3	1073.3	6	5.6	31.5	0.622	31	112.1	20	1	2.32836	37.655	94.1767	0.657729	2.42044
10	7	9.23	175	1070.3	1076.3	1073.3	6	5.6	31.5	0.622	31	112.1	20	1	2.32836	37.655	94.1767	0.657729	1.64432
11	7	9.23	175	1070.3	1076.3	1073.3	6	5.6	31.5	0.622	31	112.1	20	1	2.32836	37.655	94.1767	0.657729	1.43385
1	7	10.82	150	910.3	917.8	914.05	7.2	5.4	31.6	0.767	33	109.32	17	2	6.25177	34.0635	84.4928	0.868302	2.25758
2	7	10.82	150	910.3	917.8	914.05	7.2	5.4	31.6	0.767	33	109.32	17	2	6.25177	34.0635	84.4928	0.868302	4.41966
3	7	10.82	150	910.3	917.8	914.05	7.2	5.4	31.6	0.767	33	109.32	17	2	6.25177	34.0635	84.4928	0.868302	3.76843
4	7	10.82	150	910.3	917.8	914.05	7.2	5.4	31.6	0.767	33	109.32	17	2	6.25177	34.0635	84.4928	0.868302	2.657
5	7	10.82	150	910.3	917.8	914.05	7.2	5.4	31.6	0.767	33	109.32	17	2	6.25177	34.0635	84.4928	0.868302	3.09115
6	7	10.82	150	910.3	917.8	914.05	7.2	5.4	31.6	0.767	33	109.32	17	2	6.25177	34.0635	84.4928	0.868302	3.92472
7	7	10.82	150	910.3	917.8	914.05	7.2	5.4	31.6	0.767	33	109.32	17	2	6.25177	34.0635	84.4928	0.868302	2.38783
8	7	10.82	150	910.3	917.8	914.05	7.2	5.4	31.6	0.767	33	109.32	17	2	6.25177	34.0635	84.4928	0.868302	1.17221
9	7	10.82	150	910.3	917.8	914.05	7.2	5.4	31.6	0.767	33	109.32	17	2	6.25177	34.0635	84.4928	0.868302	0.156294
10	7	10.82	150	910.3	917.8	914.05	7.2	5.4	31.6	0.767	33	109.32	17	2	6.25177	34.0635	84.4928	0.868302	0.251808
1	7	10.23	150	885.7	891.1	888.4	5.4	2.4	31.6	0.93	25	72.94	11.5	1	0	0	0	0.33768	0.928621
2	7	10.23	150	885.7	891.1	888.4	5.4	2.4	31.6	0.93	25	72.94	11.5	1	0	0	0	0.33768	0.793549
3	7	10.23	150	885.7	891.1	888.4	5.4	2.4	31.6	0.93	25	72.94	11.5	1	0	0	0	0.33768	0.746274
4	7	10.23	150	885.7	891.1	888.4	5.4	2.4	31.6	0.93	25	72.94	11.5	1	0	0	0	0.33768	0.631462
5	7	10.23	150	885.7	891.1	888.4	5.4	2.4	31.6	0.93	25	72.94	11.5	1	0	0	0	0.33768	0.726013
6	7	10.23	150	885.7	891.1	888.4	5.4	2.4	31.6	0.93	25	72.94	11.5	1	0	0	0	0.33768	0.695622
7	7	10.23	150	885.7	891.1	888.4	5.4	2.4	31.6	0.93	25	72.94	11.5	1	0	0	0	0.33768	0.692245
8	7	10.23	150	885.7	891.1	888.4	5.4	2.4	31.6	0.93	25	72.94	11.5	1	0	0	0	0.33768	0.678738
9	7	10.23	150	885.7	891.1	888.4	5.4	2.4	31.6	0.93	25	72.94	11.5	1	0	0	0	0.33768	0.347811
10	7	10.23	150	885.7	891.1	888.4	5.4	2.4	31.6	0.93	25	72.94	11.5	1	0	0	0	0.33768	0.236376
11	7	10.23	150	885.7	891.1	888.4	5.4	2.4	31.6	0.93	25	72.94	11.5	1	0	0	0	0.33768	0.293782
12	7	10.23	150	885.7	891.1	888.4	5.4	2.4	31.6	0.93	25	72.94	11.5	1	0	0	0	0.33768	0.226246
1	7	10.35	175	925.3	928.2	926.75	2.9	2	31.2	0.821	22	71.14	11.5	1	0.663619	5.32612	88.9207	0.286043	0.214532
2	7	10.35	175	925.3	928.2	926.75	2.9	2	31.2	0.821	22	71.14	11.5	1	0.663619	5.32612	88.9207	0.286043	0.20023
3	7	10.35	175	925.3	928.2	926.75	2.9	2	31.2	0.821	22	71.14	11.5	1	0.663619	5.32612	88.9207	0.286043	0.0886733
1	7	9.57	175	918.6	925.3	921.95	5.7	4.1	32.4	1.245	0	176.76	29	2	1.51064	18.0933	92.2942	0.858317	1.47631
2	7	9.57	175	918.6	925.3	921.95	5.7	4.1	32.4	1.245	0	176.76	29	2	1.51064	18.0933	92.2942	0.858317	1.06431
3	7	9.57	175	918.6	925.3	921.95	5.7	4.1	32.4	1.245	0	176.76	29	2	1.51064	18.0933	92.2942	0.858317	0.51499
4	7	9.57	175	918.6	925.3	921.95	5.7	4.1	32.4	1.245	0	176.76	29	2	1.51064	18.0933	92.2942	0.858317	0.944149
5	7	9.57	175	918.6	925.3	921.95	5.7	4.1	32.4	1.245	0	176.76	29	2	1.51064	18.0933	92.2942	0.858317	1.09006
6	7	9.57	175	918.6	925.3	921.95	5.7	4.1	32.4	1.245	0	176.76	29	2	1.51064	18.0933	92.2942	0.858317	1.87972
7	7	9.57	175	918.6	925.3	921.95	5.7	4.1	32.4	1.245	0	176.76	29	2	1.51064	18.0933	92.2942	0.858317	2.46337
8	7	9.57	175	918.6	925.3	921.95	5.7	4.1	32.4	1.245	0	176.76	29	2	1.51064	18.0933	92.2942	0.858317	3.08994
9	7	9.57	175	918.6	925.3	921.95	5.7	4.1	32.4	1.245	0	176.76	29	2	1.51064	18.0933	92.2942	0.858317	3.3646
10	7	9.57	175	918.6	925.3	921.95	5.7	4.1	32.4	1.245	0	176.76	29	2	1.51064	18.0933	92.2942	0.858317	2.95261
11	7	9.57	175	918.6	925.3	921.95	5.7	4.1	32.4	1.245	0	176.76	29	2	1.51064	18.0933	92.2942	0.858317	2.24021
1	7	9.82	125	1020	1025.3	1022.65	5.1	3.7	31.6	1.083	25	53.28	8.5	1	0	0	0	0.621747	4.30871
2	7	9.82	125	1020	1025.3	1022.65	5.1	3.7	31.6	1.083	25	53.28	8.5	1	0	0	0	0.621747	5.3719
3	7	9.82	125	1020	1025.3	1022.65	5.1	3.7	31.6	1.083	25	53.28	8.5	1	0	0	0	0.621747	5.60816
4	7	9.82	125	1020	1025.3	1022.65	5.1	3.7	31.6	1.083	25	53.28	8.5	1	0	0	0	0.621747	5.49625
5	7	9.82	125	1020	1025.3	1022.65	5.1	3.7	31.6	1.083	25	53.28	8.5	1	0	0	0	0.621747	4.95533
6	7	9.82	125	1020	1025.3	1022.65	5.1	3.7	31.6	1.083	25	53.28	8.5	1	0	0	0	0.621747	3.202
7	7	9.82	125	1020	1025.3	1022.65	5.1	3.7	31.6	1.083	25	53.28	8.5	1	0	0	0	0.621747	4.07866
8	7	9.82	125	1020	1025.3	1022.65	5.1	3.7	31.6	1.083	25	53.28	8.5	1	0	0	0	0.621747	4.02892
9	7	9.82	125	1020	1025.3	1022.65	5.1	3.7	31.6	1.083	25	53.28	8.5	1	0	0	0	0.621747	3.84862
10	7	9.82	125	1020	1025.3	1022.65	5.1	3.7	31.6	1.083	25	53.28	8.5	1	0	0	0	0.621747	4.02271
11	7	9.82	125	1020	1025.3	1022.65	5.1	3.7	31.6	1.083	25	53.28	8.5	1	0	0	0	0.621747	3.41961
12	7	9.82	125	1020	1025.3	1022.65	5.1	3.7	31.6	1.083	25	53.28	8.5	1	0	0	0	0.621747	3.22065
1	7	10.75	150	1056.7	1065	1060.85	7.7	5.9	31.4	0.739	38	144.48	23	2	0	0	0	0.859353	1.50387
2	7	10.75	150	1056.7	1065	1060.85	7.7	5.9	31.4	0.739	38	144.48	23	2	0	0	0	0.859353	3.73819
3	7	10.75	150	1056.7	1065	1060.85	7.7	5.9	31.4	0.739	38	144.48	23	2	0	0	0	0.859353	4.67488
4	7	10.75	150	1056.7	1065	1060.85	7.7	5.9	31.4	0.739	38	144.48	23	2	0	0	0	0.859353	4.54598
5	7	10.75	150	1056.7	1065	1060.85	7.7	5.9	31.4	0.739	38	144.48	23	2	0	0	0	0.859353	4.22802
6	7	10.75	150	1056.7	1065	1060.85	7.7	5.9	31.4	0.739	38	144.48	23	2	0	0	0	0.859353	3.78975
7	7	10.75	150	1056.7	1065	1060.85	7.7	5.9	31.4	0.739	38	144.48	23	2	0	0	0	0.859353	4.03896
8	7	10.75	150	1056.7	1065	1060.85	7.7	5.9	31.4	0.739	38	144.48	23	2	0	0	0	0.859353	4.33114
9	7	10.75	150	1056.7	1065	1060.85	7.7	5.9	31.4	0.739	38	144.48	23	2	0	0	0	0.859353	4.15927
10	7	10.75	150	1056.7	1065	1060.85	7.7	5.9	31.4	0.739	38	144.48	23	2	0	0	0	0.859353	3.76397
11	7	10.75	150	1056.7	1065	1060.85	7.7	5.9	31.4	0.739	38	144.48	23	2	0	0	0	0.859353	2.63821
12	7	10.75	150	1056.7	1065	1060.85	7.7	5.9	31.4	0.739	38	144.48	23	2	0	0	0	0.859353	2.62962
1	7	8.98	125	947.8	957.3	952.55	9	7.5	31.7	0.74	37	91	15	1	2.15423	23.3943	91.5681	0.549548	0.736395
2	7	8.98	125	947.8	957.3	952.55	9	7.5	31.7	0.74	37	91	15	1	2.15423	23.3943	91.5681	0.549548	1.25847
3	7	8.98	125	947.8	957.3	952.55	9	7.5	31.7	0.74	37	91	15	1	2.15423	23.3943	91.5681	0.549548	1.38486
4	7	8.98	125	947.8	957.3	952.55	9	7.5	31.7	0.74	37	91	15	1	2.15423	23.3943	91.5681	0.549548	1.11558
5	7	8.98	125	947.8	957.3	952.55	9	7.5	31.7	0.74	37	91	15	1	2.15423	23.3943	91.5681	0.549548	0.950719
6	7	8.98	125	947.8	957.3	952.55	9	7.5	31.7	0.74	37	91	15	1	2.15423	23.3943	91.5681	0.549548	0.752881
7	7	8.98	125	947.8	957.3	952.55	9	7.5	31.7	0.74	37	91	15	1	2.15423	23.3943	91.5681	0.549548	1.26396
8	7	8.98	125	947.8	957.3	952.55	9	7.5	31.7	0.74	37	91	15	1	2.15423	23.3943	91.5681	0.549548	1.19252
9	7	8.98	125	947.8	957.3	952.55	9	7.5	31.7	0.74	37	91	15	1	2.15423	23.3943	91.5681	0.549548	1.08261
10	7	8.98	125	947.8	957.3	952.55	9	7.5	31.7	0.74	37	91	15	1	2.15423	23.3943	91.5681	0.549548	1.74756
11	7	8.98	125	947.8	957.3	952.55	9	7.5	31.7	0.74	37	91	15	1	2.15423	23.3943	91.5681	0.549548	1.53874
1	7	9.32	175	1039.5	1051.6	1045.55	7.3	7.1	32.1	1.016	33	122.97	15	1	1.17438	19.3433	94.2763	0.485281	0.189259
2	7	9.32	175	1039.5	1051.6	1045.55	7.3	7.1	32.1	1.016	33	122.97	15	1	1.17438	19.3433	94.2763	0.485281	0.0776449
3	7	9.32	175	1039.5	1051.6	1045.55	7.3	7.1	32.1	1.016	33	122.97	15	1	1.17438	19.3433	94.2763	0.485281	0.325138
4	7	9.32	175	1039.5	1051.6	1045.55	7.3	7.1	32.1	1.016	33	122.97	15	1	1.17438	19.3433	94.2763	0.485281	0.237788
5	7	9.32	175	1039.5	1051.6	1045.55	7.3	7.1	32.1	1.016	33	122.97	15	1	1.17438	19.3433	94.2763	0.485281	0.354255
6	7	9.32	175	1039.5	1051.6	1045.55	7.3	7.1	32.1	1.016	33	122.97	15	1	1.17438	19.3433	94.2763	0.485281	0.626012
7	7	9.32	175	1039.5	1051.6	1045.55	7.3	7.1	32.1	1.016	33	122.97	15	1	1.17438	19.3433	94.2763	0.485281	0.407636
8	7	9.32	175	1039.5	1051.6	1045.55	7.3	7.1	32.1	1.016	33	122.97	15	1	1.17438	19.3433	94.2763	0.485281	0.354255
9	7	9.32	175	1039.5	1051.6	1045.55	7.3	7.1	32.1	1.016	33	122.97	15	1	1.17438	19.3433	94.2763	0.485281	0.67454
10	7	9.32	175	1039.5	1051.6	1045.55	7.3	7.1	32.1	1.016	33	122.97	15	1	1.17438	19.3433	94.2763	0.485281	0.378519
11	7	9.32	175	1039.5	1051.6	1045.55	7.3	7.1	32.1	1.016	33	122.97	15	1	1.17438	19.3433	94.2763	0.485281	0.145584
1	7	11.78	175	990.7	1000.5	995.6	9.8	8.5	31.5	0.92	23	121.59	19	1	2.74846	26.9719	90.7523	0.596196	1.24009
2	7	11.78	175	990.7	1000.5	995.6	9.8	8.5	31.5	0.92	23	121.59	19	1	2.74846	26.9719	90.7523	0.596196	1.54415
3	7	11.78	175	990.7	1000.5	995.6	9.8	8.5	31.5	0.92	23	121.59	19	1	2.74846	26.9719	90.7523	0.596196	2.05687
4	7	11.78	175	990.7	1000.5	995.6	9.8	8.5	31.5	0.92	23	121.59	19	1	2.74846	26.9719	90.7523	0.596196	2.62326
5	7	11.78	175	990.7	1000.5	995.6	9.8	8.5	31.5	0.92	23	121.59	19	1	2.74846	26.9719	90.7523	0.596196	2.73058
6	7	11.78	175	990.7	1000.5	995.6	9.8	8.5	31.5	0.92	23	121.59	19	1	2.74846	26.9719	90.7523	0.596196	2.7425
7	7	11.78	175	990.7	1000.5	995.6	9.8	8.5	31.5	0.92	23	121.59	19	1	2.74846	26.9719	90.7523	0.596196	2.39671
8	7	11.78	175	990.7	1000.5	995.6	9.8	8.5	31.5	0.92	23	121.59	19	1	2.74846	26.9719	90.7523	0.596196	2.29535
9	7	11.78	175	990.7	1000.5	995.6	9.8	8.5	31.5	0.92	23	121.59	19	1	2.74846	26.9719	90.7523	0.596196	1.23412
10	7	11.78	175	990.7	1000.5	995.6	9.8	8.5	31.5	0.92	23	121.59	19	1	2.74846	26.9719	90.7523	0.596196	0.727359
11	7	11.78	175	990.7	1000.5	995.6	9.8	8.5	31.5	0.92	23	121.59	19	1	2.74846	26.9719	90.7523	0.596196	0.649853
12	7	11.78	175	990.7	1000.5	995.6	9.8	8.5	31.5	0.92	23	121.59	19	1	2.74846	26.9719	90.7523	0.596196	0.614082
1	7	11.32	175	1010.8	1014.5	1012.65	3.7	3.1	31.6	0.952	31	273.64	46	1	0.459296	5.89251	92.769	0.153611	0.0491554
2	7	11.32	175	1010.8	1014.5	1012.65	3.7	3.1	31.6	0.952	31	273.64	46	1	0.459296	5.89251	92.769	0.153611	0.115208
3	7	11.32	175	1010.8	1014.5	1012.65	3.7	3.1	31.6	0.952	31	273.64	46	1	0.459296	5.89251	92.769	0.153611	0.0460832
4	7	11.32	175	1010.8	1014.5	1012.65	3.7	3.1	31.6	0.952	31	273.64	46	1	0.459296	5.89251	92.769	0.153611	0.199694
5	7	11.32	175	1010.8	1014.5	1012.65	3.7	3.1	31.6	0.952	31	273.64	46	1	0.459296	5.89251	92.769	0.153611	0.298005
6	7	11.32	175	1010.8	1014.5	1012.65	3.7	3.1	31.6	0.952	31	273.64	46	1	0.459296	5.89251	92.769	0.153611	0.0599082
7	7	11.32	175	1010.8	1014.5	1012.65	3.7	3.1	31.6	0.952	31	273.64	46	1	0.459296	5.89251	92.769	0.153611	0.0184333
1	7	11.32	175	1016.3	1028.9	1022.6	12.6	11.6	31.6	1.219	32	142.32	23.5	1	2.20067	28.2334	92.769	0.736011	0.235524
2	7	11.32	175	1016.3	1028.9	1022.6	12.6	11.6	31.6	1.219	32	142.32	23.5	1	2.20067	28.2334	92.769	0.736011	0.552009
3	7	11.32	175	1016.3	1028.9	1022.6	12.6	11.6	31.6	1.219	32	142.32	23.5	1	2.20067	28.2334	92.769	0.736011	0.220803
4	7	11.32	175	1016.3	1028.9	1022.6	12.6	11.6	31.6	1.219	32	142.32	23.5	1	2.20067	28.2334	92.769	0.736011	0.956815
5	7	11.32	175	1016.3	1028.9	1022.6	12.6	11.6	31.6	1.219	32	142.32	23.5	1	2.20067	28.2334	92.769	0.736011	1.42786
6	7	11.32	175	1016.3	1028.9	1022.6	12.6	11.6	31.6	1.219	32	142.32	23.5	1	2.20067	28.2334	92.769	0.736011	0.287044
7	7	11.32	175	1016.3	1028.9	1022.6	12.6	11.6	31.6	1.219	32	142.32	23.5	1	2.20067	28.2334	92.769	0.736011	0.0883214
1	7	11.32	175	1030.5	1033.4	1031.95	2.9	2.3	29.2	0.922	31	142.32	23.5	1	0.33003	4.23409	92.769	0.110378	0.0353209
2	7	11.32	175	1030.5	1033.4	1031.95	2.9	2.3	29.2	0.922	31	142.32	23.5	1	0.33003	4.23409	92.769	0.110378	0.0827833
3	7	11.32	175	1030.5	1033.4	1031.95	2.9	2.3	29.2	0.922	31	142.32	23.5	1	0.33003	4.23409	92.769	0.110378	0.0331133
4	7	11.32	175	1030.5	1033.4	1031.95	2.9	2.3	29.2	0.922	31	142.32	23.5	1	0.33003	4.23409	92.769	0.110378	0.143491
5	7	11.32	175	1030.5	1033.4	1031.95	2.9	2.3	29.2	0.922	31	142.32	23.5	1	0.33003	4.23409	92.769	0.110378	0.214133
6	7	11.32	175	1030.5	1033.4	1031.95	2.9	2.3	29.2	0.922	31	142.32	23.5	1	0.33003	4.23409	92.769	0.110378	0.0430473
7	7	11.32	175	1030.5	1033.4	1031.95	2.9	2.3	29.2	0.922	31	142.32	23.5	1	0.33003	4.23409	92.769	0.110378	0.0132453
1	7	10.24	175	997.2	1013.7	1005.45	16.5	13.8	31.2	0.629	31	224.11	37	2	2.44429	8.56939	77.8068	0.958545	0.766836
2	7	10.24	175	997.2	1013.7	1005.45	16.5	13.8	31.2	0.629	31	224.11	37	2	2.44429	8.56939	77.8068	0.958545	0.536785
3	7	10.24	175	997.2	1013.7	1005.45	16.5	13.8	31.2	0.629	31	224.11	37	2	2.44429	8.56939	77.8068	0.958545	0.680567
4	7	10.24	175	997.2	1013.7	1005.45	16.5	13.8	31.2	0.629	31	224.11	37	2	2.44429	8.56939	77.8068	0.958545	1.31321
5	7	10.24	175	997.2	1013.7	1005.45	16.5	13.8	31.2	0.629	31	224.11	37	2	2.44429	8.56939	77.8068	0.958545	1.87875
6	7	10.24	175	997.2	1013.7	1005.45	16.5	13.8	31.2	0.629	31	224.11	37	2	2.44429	8.56939	77.8068	0.958545	1.74455
7	7	10.24	175	997.2	1013.7	1005.45	16.5	13.8	31.2	0.629	31	224.11	37	2	2.44429	8.56939	77.8068	0.958545	1.15025
8	7	10.24	175	997.2	1013.7	1005.45	16.5	13.8	31.2	0.629	31	224.11	37	2	2.44429	8.56939	77.8068	0.958545	0.958545
9	7	10.24	175	997.2	1013.7	1005.45	16.5	13.8	31.2	0.629	31	224.11	37	2	2.44429	8.56939	77.8068	0.958545	1.28445
1	7	11.6	175	946.4	952.9	949.65	6.5	5.2	31.7	1.185	25	146.7	24	1	2.00396	34.1304	94.4541	0.630177	0.056716
2	7	11.6	175	946.4	952.9	949.65	6.5	5.2	31.7	1.185	25	146.7	24	1	2.00396	34.1304	94.4541	0.630177	0.825532
3	7	11.6	175	946.4	952.9	949.65	6.5	5.2	31.7	1.185	25	146.7	24	1	2.00396	34.1304	94.4541	0.630177	1.4116
4	7	11.6	175	946.4	952.9	949.65	6.5	5.2	31.7	1.185	25	146.7	24	1	2.00396	34.1304	94.4541	0.630177	0.812929
5	7	11.6	175	946.4	952.9	949.65	6.5	5.2	31.7	1.185	25	146.7	24	1	2.00396	34.1304	94.4541	0.630177	0.800325
6	7	11.6	175	946.4	952.9	949.65	6.5	5.2	31.7	1.185	25	146.7	24	1	2.00396	34.1304	94.4541	0.630177	1.51873
7	7	11.6	175	946.4	952.9	949.65	6.5	5.2	31.7	1.185	25	146.7	24	1	2.00396	34.1304	94.4541	0.630177	1.27926
8	7	11.6	175	946.4	952.9	949.65	6.5	5.2	31.7	1.185	25	146.7	24	1	2.00396	34.1304	94.4541	0.630177	1.30447
9	7	11.6	175	946.4	952.9	949.65	6.5	5.2	31.7	1.185	25	146.7	24	1	2.00396	34.1304	94.4541	0.630177	1.09651
10	7	11.6	175	946.4	952.9	949.65	6.5	5.2	31.7	1.185	25	146.7	24	1	2.00396	34.1304	94.4541	0.630177	1.62586
11	7	11.6	175	946.4	952.9	949.65	6.5	5.2	31.7	1.185	25	146.7	24	1	2.00396	34.1304	94.4541	0.630177	0.825532
1	7	11.6	175	957.5	963.1	960.3	5.6	3	31.8	1.127	29	146.7	24	1	1.09955	18.7269	94.4541	0.345769	0.0311192
2	7	11.6	175	957.5	963.1	960.3	5.6	3	31.8	1.127	29	146.7	24	1	1.09955	18.7269	94.4541	0.345769	0.452958
3	7	11.6	175	957.5	963.1	960.3	5.6	3	31.8	1.127	29	146.7	24	1	1.09955	18.7269	94.4541	0.345769	0.774523
4	7	11.6	175	957.5	963.1	960.3	5.6	3	31.8	1.127	29	146.7	24	1	1.09955	18.7269	94.4541	0.345769	0.446042
5	7	11.6	175	957.5	963.1	960.3	5.6	3	31.8	1.127	29	146.7	24	1	1.09955	18.7269	94.4541	0.345769	0.439127
6	7	11.6	175	957.5	963.1	960.3	5.6	3	31.8	1.127	29	146.7	24	1	1.09955	18.7269	94.4541	0.345769	0.833304
7	7	11.6	175	957.5	963.1	960.3	5.6	3	31.8	1.127	29	146.7	24	1	1.09955	18.7269	94.4541	0.345769	0.701911
8	7	11.6	175	957.5	963.1	960.3	5.6	3	31.8	1.127	29	146.7	24	1	1.09955	18.7269	94.4541	0.345769	0.715742
9	7	11.6	175	957.5	963.1	960.3	5.6	3	31.8	1.127	29	146.7	24	1	1.09955	18.7269	94.4541	0.345769	0.601638
10	7	11.6	175	957.5	963.1	960.3	5.6	3	31.8	1.127	29	146.7	24	1	1.09955	18.7269	94.4541	0.345769	0.892084
11	7	11.6	175	957.5	963.1	960.3	5.6	3	31.8	1.127	29	146.7	24	1	1.09955	18.7269	94.4541	0.345769	0.452958
1	7	10.3	150	1115.9	1123.7	1119.8	7.4	6.8	29.2	0.553	27	108.14	19	2	3.62922	28.9103	88.8467	0.822953	3.4564
2	7	10.3	150	1115.9	1123.7	1119.8	7.4	6.8	29.2	0.553	27	108.14	19	2	3.62922	28.9103	88.8467	0.822953	6.22152
3	7	10.3	150	1115.9	1123.7	1119.8	7.4	6.8	29.2	0.553	27	108.14	19	2	3.62922	28.9103	88.8467	0.822953	4.4028
4	7	10.3	150	1115.9	1123.7	1119.8	7.4	6.8	29.2	0.553	27	108.14	19	2	3.62922	28.9103	88.8467	0.822953	3.41525
5	7	10.3	150	1115.9	1123.7	1119.8	7.4	6.8	29.2	0.553	27	108.14	19	2	3.62922	28.9103	88.8467	0.822953	2.6746
6	7	10.3	150	1115.9	1123.7	1119.8	7.4	6.8	29.2	0.553	27	108.14	19	2	3.62922	28.9103	88.8467	0.822953	1.33318
7	7	10.3	150	1115.9	1123.7	1119.8	7.4	6.8	29.2	0.553	27	108.14	19	2	3.62922	28.9103	88.8467	0.822953	1.98332
8	7	10.3	150	1115.9	1123.7	1119.8	7.4	6.8	29.2	0.553	27	108.14	19	2	3.62922	28.9103	88.8467	0.822953	2.60053
9	7	10.3	150	1115.9	1123.7	1119.8	7.4	6.8	29.2	0.553	27	108.14	19	2	3.62922	28.9103	88.8467	0.822953	1.52246
10	7	10.3	150	1115.9	1123.7	1119.8	7.4	6.8	29.2	0.553	27	108.14	19	2	3.62922	28.9103	88.8467	0.822953	0.600755
11	7	10.3	150	1115.9	1123.7	1119.8	7.4	6.8	29.2	0.553	27	108.14	19	2	3.62922	28.9103	88.8467	0.822953	0.238656
1	7	11.82	150	907.8	916	911.9	7.2	5.5	30.2	0.646	30	105	17	2	1.73796	23.2732	93.0513	0.700789	6.15293
2	7	11.82	150	907.8	916	911.9	7.2	5.5	30.2	0.646	30	105	17	2	1.73796	23.2732	93.0513	0.700789	5.50119
3	7	11.82	150	907.8	916	911.9	7.2	5.5	30.2	0.646	30	105	17	2	1.73796	23.2732	93.0513	0.700789	3.59505
4	7	11.82	150	907.8	916	911.9	7.2	5.5	30.2	0.646	30	105	17	2	1.73796	23.2732	93.0513	0.700789	3.68615
5	7	11.82	150	907.8	916	911.9	7.2	5.5	30.2	0.646	30	105	17	2	1.73796	23.2732	93.0513	0.700789	2.97135
6	7	11.82	150	907.8	916	911.9	7.2	5.5	30.2	0.646	30	105	17	2	1.73796	23.2732	93.0513	0.700789	2.55087
7	7	11.82	150	907.8	916	911.9	7.2	5.5	30.2	0.646	30	105	17	2	1.73796	23.2732	93.0513	0.700789	2.50182
8	7	11.82	150	907.8	916	911.9	7.2	5.5	30.2	0.646	30	105	17	2	1.73796	23.2732	93.0513	0.700789	2.95733
9	7	11.82	150	907.8	916	911.9	7.2	5.5	30.2	0.646	30	105	17	2	1.73796	23.2732	93.0513	0.700789	1.62583
10	7	11.82	150	907.8	916	911.9	7.2	5.5	30.2	0.646	30	105	17	2	1.73796	23.2732	93.0513	0.700789	1.43662
11	7	11.82	150	907.8	916	911.9	7.2	5.5	30.2	0.646	30	105	17	2	1.73796	23.2732	93.0513	0.700789	1.00914
12	7	11.82	150	907.8	916	911.9	7.2	5.5	30.2	0.646	30	105	17	2	1.73796	23.2732	93.0513	0.700789	2.01827
1	7	11.7	150	1128.5	1135.3	1131.9	6.8	5.8	30.7	0.527	34	90.64	15	1	1.15515	26.5751	95.8343	0.667715	0.661038
2	7	11.7	150	1128.5	1135.3	1131.9	6.8	5.8	30.7	0.527	34	90.64	15	1	1.15515	26.5751	95.8343	0.667715	3.44541
3	7	11.7	150	1128.5	1135.3	1131.9	6.8	5.8	30.7	0.527	34	90.64	15	1	1.15515	26.5751	95.8343	0.667715	5.48194
4	7	11.7	150	1128.5	1135.3	1131.9	6.8	5.8	30.7	0.527	34	90.64	15	1	1.15515	26.5751	95.8343	0.667715	6.16301
5	7	11.7	150	1128.5	1135.3	1131.9	6.8	5.8	30.7	0.527	34	90.64	15	1	1.15515	26.5751	95.8343	0.667715	8.02594
6	7	11.7	150	1128.5	1135.3	1131.9	6.8	5.8	30.7	0.527	34	90.64	15	1	1.15515	26.5751	95.8343	0.667715	9.4682
7	7	11.7	150	1128.5	1135.3	1131.9	6.8	5.8	30.7	0.527	34	90.64	15	1	1.15515	26.5751	95.8343	0.667715	7.71879
8	7	11.7	150	1128.5	1135.3	1131.9	6.8	5.8	30.7	0.527	34	90.64	15	1	1.15515	26.5751	95.8343	0.667715	7.88572
9	7	11.7	150	1128.5	1135.3	1131.9	6.8	5.8	30.7	0.527	34	90.64	15	1	1.15515	26.5751	95.8343	0.667715	8.58014
10	7	11.7	150	1128.5	1135.3	1131.9	6.8	5.8	30.7	0.527	34	90.64	15	1	1.15515	26.5751	95.8343	0.667715	6.30323
11	7	11.7	150	1128.5	1135.3	1131.9	6.8	5.8	30.7	0.527	34	90.64	15	1	1.15515	26.5751	95.8343	0.667715	6.14298
12	7	11.7	150	1128.5	1135.3	1131.9	6.8	5.8	30.7	0.527	34	90.64	15	1	1.15515	26.5751	95.8343	0.667715	5.20818
1	7	11.78	175	1016.6	1024.4	1020.5	7.8	7.4	27	0.948	27	119.62	19	1	0	0	94.702	0.531591	3.21613
2	7	11.78	175	1016.6	1024.4	1020.5	7.8	7.4	27	0.948	27	119.62	19	1	0	0	94.702	0.531591	2.89186
3	7	11.78	175	1016.6	1024.4	1020.5	7.8	7.4	27	0.948	27	119.62	19	1	0	0	94.702	0.531591	2.31774
4	7	11.78	175	1016.6	1024.4	1020.5	7.8	7.4	27	0.948	27	119.62	19	1	0	0	94.702	0.531591	1.86057
5	7	11.78	175	1016.6	1024.4	1020.5	7.8	7.4	27	0.948	27	119.62	19	1	0	0	94.702	0.531591	1.46188
6	7	11.78	175	1016.6	1024.4	1020.5	7.8	7.4	27	0.948	27	119.62	19	1	0	0	94.702	0.531591	0.924969
7	7	11.78	175	1016.6	1024.4	1020.5	7.8	7.4	27	0.948	27	119.62	19	1	0	0	94.702	0.531591	0.584751
8	7	11.78	175	1016.6	1024.4	1020.5	7.8	7.4	27	0.948	27	119.62	19	1	0	0	94.702	0.531591	0.940917
9	7	11.78	175	1016.6	1024.4	1020.5	7.8	7.4	27	0.948	27	119.62	19	1	0	0	94.702	0.531591	1.25456
10	7	11.78	175	1016.6	1024.4	1020.5	7.8	7.4	27	0.948	27	119.62	19	1	0	0	94.702	0.531591	1.11634
11	7	11.78	175	1016.6	1024.4	1020.5	7.8	7.4	27	0.948	27	119.62	19	1	0	0	94.702	0.531591	1.01002
12	7	11.78	175	1016.6	1024.4	1020.5	7.8	7.4	27	0.948	27	119.62	19	1	0	0	94.702	0.531591	0.935601
1	7	11.78	175	1023.8	1038.2	1031	8	6.2	31.5	0.997	29	122.52	19	1	0	0	94.702	0.468409	2.83387
2	7	11.78	175	1023.8	1038.2	1031	8	6.2	31.5	0.997	29	122.52	19	1	0	0	94.702	0.468409	2.54814
3	7	11.78	175	1023.8	1038.2	1031	8	6.2	31.5	0.997	29	122.52	19	1	0	0	94.702	0.468409	2.04226
4	7	11.78	175	1023.8	1038.2	1031	8	6.2	31.5	0.997	29	122.52	19	1	0	0	94.702	0.468409	1.63943
5	7	11.78	175	1023.8	1038.2	1031	8	6.2	31.5	0.997	29	122.52	19	1	0	0	94.702	0.468409	1.28812
6	7	11.78	175	1023.8	1038.2	1031	8	6.2	31.5	0.997	29	122.52	19	1	0	0	94.702	0.468409	0.815031
7	7	11.78	175	1023.8	1038.2	1031	8	6.2	31.5	0.997	29	122.52	19	1	0	0	94.702	0.468409	0.515249
8	7	11.78	175	1023.8	1038.2	1031	8	6.2	31.5	0.997	29	122.52	19	1	0	0	94.702	0.468409	0.829083
9	7	11.78	175	1023.8	1038.2	1031	8	6.2	31.5	0.997	29	122.52	19	1	0	0	94.702	0.468409	1.10544
10	7	11.78	175	1023.8	1038.2	1031	8	6.2	31.5	0.997	29	122.52	19	1	0	0	94.702	0.468409	0.983658
11	7	11.78	175	1023.8	1038.2	1031	8	6.2	31.5	0.997	29	122.52	19	1	0	0	94.702	0.468409	0.889976
12	7	11.78	175	1023.8	1038.2	1031	8	6.2	31.5	0.997	29	122.52	19	1	0	0	94.702	0.468409	0.824399
1	7	9.23	175	1064.6	1068.6	1066.6	4	2.3	32	1.012	27	123.04	19	1	0.353864	16.9114	97.9504	0.411469	0.115211
2	7	9.23	175	1064.6	1068.6	1066.6	4	2.3	32	1.012	27	123.04	19	1	0.353864	16.9114	97.9504	0.411469	1.02867
3	7	9.23	175	1064.6	1068.6	1066.6	4	2.3	32	1.012	27	123.04	19	1	0.353864	16.9114	97.9504	0.411469	1.23441
4	7	9.23	175	1064.6	1068.6	1066.6	4	2.3	32	1.012	27	123.04	19	1	0.353864	16.9114	97.9504	0.411469	1.49775
5	7	9.23	175	1064.6	1068.6	1066.6	4	2.3	32	1.012	27	123.04	19	1	0.353864	16.9114	97.9504	0.411469	1.71583
6	7	9.23	175	1064.6	1068.6	1066.6	4	2.3	32	1.012	27	123.04	19	1	0.353864	16.9114	97.9504	0.411469	1.36608
7	7	9.23	175	1064.6	1068.6	1066.6	4	2.3	32	1.012	27	123.04	19	1	0.353864	16.9114	97.9504	0.411469	1.41134
8	7	9.23	175	1064.6	1068.6	1066.6	4	2.3	32	1.012	27	123.04	19	1	0.353864	16.9114	97.9504	0.411469	1.21383
9	7	9.23	175	1064.6	1068.6	1066.6	4	2.3	32	1.012	27	123.04	19	1	0.353864	16.9114	97.9504	0.411469	0.87643
10	7	9.23	175	1064.6	1068.6	1066.6	4	2.3	32	1.012	27	123.04	19	1	0.353864	16.9114	97.9504	0.411469	0.580172
1	7	9.65	175	974.1	981.4	977.75	7.3	6	31.3	0.842	30	95.35	15	1	1.03494	13.8047	93.0258	0.327514	1.08735
2	7	9.65	175	974.1	981.4	977.75	7.3	6	31.3	0.842	30	95.35	15	1	1.03494	13.8047	93.0258	0.327514	0.939965
3	7	9.65	175	974.1	981.4	977.75	7.3	6	31.3	0.842	30	95.35	15	1	1.03494	13.8047	93.0258	0.327514	1.09062
4	7	9.65	175	974.1	981.4	977.75	7.3	6	31.3	0.842	30	95.35	15	1	1.03494	13.8047	93.0258	0.327514	1.29368
5	7	9.65	175	974.1	981.4	977.75	7.3	6	31.3	0.842	30	95.35	15	1	1.03494	13.8047	93.0258	0.327514	0.681229
6	7	9.65	175	974.1	981.4	977.75	7.3	6	31.3	0.842	30	95.35	15	1	1.03494	13.8047	93.0258	0.327514	0.514197
7	7	9.65	175	974.1	981.4	977.75	7.3	6	31.3	0.842	30	95.35	15	1	1.03494	13.8047	93.0258	0.327514	0.524022
8	7	9.65	175	974.1	981.4	977.75	7.3	6	31.3	0.842	30	95.35	15	1	1.03494	13.8047	93.0258	0.327514	0.455244
9	7	9.65	175	974.1	981.4	977.75	7.3	6	31.3	0.842	30	95.35	15	1	1.03494	13.8047	93.0258	0.327514	0.596075
1	7	9.88	175	962	967.2	964.6	5.2	4.4	31.1	0.838	0	73.08	15	1	1.96365	15.3224	88.6403	0.425033	1.62362
2	7	9.88	175	962	967.2	964.6	5.2	4.4	31.1	0.838	0	73.08	15	1	1.96365	15.3224	88.6403	0.425033	1.81064
3	7	9.88	175	962	967.2	964.6	5.2	4.4	31.1	0.838	0	73.08	15	1	1.96365	15.3224	88.6403	0.425033	1.56412
4	7	9.88	175	962	967.2	964.6	5.2	4.4	31.1	0.838	0	73.08	15	1	1.96365	15.3224	88.6403	0.425033	1.12209
5	7	9.88	175	962	967.2	964.6	5.2	4.4	31.1	0.838	0	73.08	15	1	1.96365	15.3224	88.6403	0.425033	1.18159
6	7	9.88	175	962	967.2	964.6	5.2	4.4	31.1	0.838	0	73.08	15	1	1.96365	15.3224	88.6403	0.425033	0.947823
7	7	9.88	175	962	967.2	964.6	5.2	4.4	31.1	0.838	0	73.08	15	1	1.96365	15.3224	88.6403	0.425033	0.599296
8	7	9.88	175	962	967.2	964.6	5.2	4.4	31.1	0.838	0	73.08	15	1	1.96365	15.3224	88.6403	0.425033	0.769309
9	7	9.88	175	962	967.2	964.6	5.2	4.4	31.1	0.838	0	73.08	15	1	1.96365	15.3224	88.6403	0.425033	0.318774
1	7	8.42	175	945	952	948.5	7	4.7	30	0.788	21	141.34	23.5	1	2.3038	23.3974	91.0362	0.641727	1.95085
2	7	8.42	175	945	952	948.5	7	4.7	30	0.788	21	141.34	23.5	1	2.3038	23.3974	91.0362	0.641727	0.936922
3	7	8.42	175	945	952	948.5	7	4.7	30	0.788	21	141.34	23.5	1	2.3038	23.3974	91.0362	0.641727	0.436374
4	7	8.42	175	945	952	948.5	7	4.7	30	0.788	21	141.34	23.5	1	2.3038	23.3974	91.0362	0.641727	0.128345
5	7	8.42	175	945	952	948.5	7	4.7	30	0.788	21	141.34	23.5	1	2.3038	23.3974	91.0362	0.641727	0.0898418
6	7	8.42	175	945	952	948.5	7	4.7	30	0.788	21	141.34	23.5	1	2.3038	23.3974	91.0362	0.641727	0.275943
7	7	8.42	175	945	952	948.5	7	4.7	30	0.788	21	141.34	23.5	1	2.3038	23.3974	91.0362	0.641727	0.0834245
1	7	8.48	125	908.9	915.6	912.25	6.7	6.3	31.7	0.859	32	74.34	11.5	1	1.81771	20.8359	91.976	0.678251	2.17719
2	7	8.48	125	908.9	915.6	912.25	6.7	6.3	31.7	0.859	32	74.34	11.5	1	1.81771	20.8359	91.976	0.678251	3.17422
3	7	8.48	125	908.9	915.6	912.25	6.7	6.3	31.7	0.859	32	74.34	11.5	1	1.81771	20.8359	91.976	0.678251	2.73335
4	7	8.48	125	908.9	915.6	912.25	6.7	6.3	31.7	0.859	32	74.34	11.5	1	1.81771	20.8359	91.976	0.678251	2.10936
5	7	8.48	125	908.9	915.6	912.25	6.7	6.3	31.7	0.859	32	74.34	11.5	1	1.81771	20.8359	91.976	0.678251	1.73632
6	7	8.48	125	908.9	915.6	912.25	6.7	6.3	31.7	0.859	32	74.34	11.5	1	1.81771	20.8359	91.976	0.678251	1.45146
7	7	8.48	125	908.9	915.6	912.25	6.7	6.3	31.7	0.859	32	74.34	11.5	1	1.81771	20.8359	91.976	0.678251	0.847814
8	7	8.48	125	908.9	915.6	912.25	6.7	6.3	31.7	0.859	32	74.34	11.5	1	1.81771	20.8359	91.976	0.678251	0.922422
9	7	8.48	125	908.9	915.6	912.25	6.7	6.3	31.7	0.859	32	74.34	11.5	1	1.81771	20.8359	91.976	0.678251	1.2005
10	7	8.48	125	908.9	915.6	912.25	6.7	6.3	31.7	0.859	32	74.34	11.5	1	1.81771	20.8359	91.976	0.678251	0.576514
1	7	8.48	125	935	935.8	935.4	4.5	3.4	32.5	0.328	38	181.16	29	2	0.37458	4.29369	91.976	0.139769	0.448657
2	7	8.48	125	935	935.8	935.4	4.5	3.4	32.5	0.328	38	181.16	29	2	0.37458	4.29369	91.976	0.139769	0.654117
3	7	8.48	125	935	935.8	935.4	4.5	3.4	32.5	0.328	38	181.16	29	2	0.37458	4.29369	91.976	0.139769	0.563268
4	7	8.48	125	935	935.8	935.4	4.5	3.4	32.5	0.328	38	181.16	29	2	0.37458	4.29369	91.976	0.139769	0.43468
5	7	8.48	125	935	935.8	935.4	4.5	3.4	32.5	0.328	38	181.16	29	2	0.37458	4.29369	91.976	0.139769	0.357808
6	7	8.48	125	935	935.8	935.4	4.5	3.4	32.5	0.328	38	181.16	29	2	0.37458	4.29369	91.976	0.139769	0.299105
7	7	8.48	125	935	935.8	935.4	4.5	3.4	32.5	0.328	38	181.16	29	2	0.37458	4.29369	91.976	0.139769	0.174711
8	7	8.48	125	935	935.8	935.4	4.5	3.4	32.5	0.328	38	181.16	29	2	0.37458	4.29369	91.976	0.139769	0.190085
9	7	8.48	125	935	935.8	935.4	4.5	3.4	32.5	0.328	38	181.16	29	2	0.37458	4.29369	91.976	0.139769	0.24739
10	7	8.48	125	935	935.8	935.4	4.5	3.4	32.5	0.328	38	181.16	29	2	0.37458	4.29369	91.976	0.139769	0.118803
1	7	11	125	894.2	902.3	898.25	9.9	3.9	31.6	0.199	27	182.96	29	2	0.839715	3.99351	82.6262	0.215865	5.96435
2	7	11	125	894.2	902.3	898.25	9.9	3.9	31.6	0.199	27	182.96	29	2	0.839715	3.99351	82.6262	0.215865	5.24336
3	7	11	125	894.2	902.3	898.25	9.9	3.9	31.6	0.199	27	182.96	29	2	0.839715	3.99351	82.6262	0.215865	3.84456
4	7	11	125	894.2	902.3	898.25	9.9	3.9	31.6	0.199	27	182.96	29	2	0.839715	3.99351	82.6262	0.215865	2.72854
5	7	11	125	894.2	902.3	898.25	9.9	3.9	31.6	0.199	27	182.96	29	2	0.839715	3.99351	82.6262	0.215865	1.45061
6	7	11	125	894.2	902.3	898.25	9.9	3.9	31.6	0.199	27	182.96	29	2	0.839715	3.99351	82.6262	0.215865	1.02104
7	7	11	125	894.2	902.3	898.25	9.9	3.9	31.6	0.199	27	182.96	29	2	0.839715	3.99351	82.6262	0.215865	1.25418
8	7	11	125	894.2	902.3	898.25	9.9	3.9	31.6	0.199	27	182.96	29	2	0.839715	3.99351	82.6262	0.215865	0.872095
9	7	11	125	894.2	902.3	898.25	9.9	3.9	31.6	0.199	27	182.96	29	2	0.839715	3.99351	82.6262	0.215865	0.595788
10	7	11	125	894.2	902.3	898.25	9.9	3.9	31.6	0.199	27	182.96	29	2	0.839715	3.99351	82.6262	0.215865	0.131678
1	7	11	125	931.5	940.4	935.95	7.7	5.5	31.7	0.619	28	165.2	28	2	3.62146	11.4817	76.0218	0.823059	18.988
2	7	11	125	931.5	940.4	935.95	7.7	5.5	31.7	0.619	28	165.2	28	2	3.62146	11.4817	76.0218	0.823059	18.0003
3	7	11	125	931.5	940.4	935.95	7.7	5.5	31.7	0.619	28	165.2	28	2	3.62146	11.4817	76.0218	0.823059	13.4735
4	7	11	125	931.5	940.4	935.95	7.7	5.5	31.7	0.619	28	165.2	28	2	3.62146	11.4817	76.0218	0.823059	8.97134
5	7	11	125	931.5	940.4	935.95	7.7	5.5	31.7	0.619	28	165.2	28	2	3.62146	11.4817	76.0218	0.823059	7.14415
6	7	11	125	931.5	940.4	935.95	7.7	5.5	31.7	0.619	28	165.2	28	2	3.62146	11.4817	76.0218	0.823059	5.45688
7	7	11	125	931.5	940.4	935.95	7.7	5.5	31.7	0.619	28	165.2	28	2	3.62146	11.4817	76.0218	0.823059	4.59267
8	7	11	125	931.5	940.4	935.95	7.7	5.5	31.7	0.619	28	165.2	28	2	3.62146	11.4817	76.0218	0.823059	4.01653
9	7	11	125	931.5	940.4	935.95	7.7	5.5	31.7	0.619	28	165.2	28	2	3.62146	11.4817	76.0218	0.823059	3.18524
10	7	11	125	931.5	940.4	935.95	7.7	5.5	31.7	0.619	28	165.2	28	2	3.62146	11.4817	76.0218	0.823059	2.9877
11	7	11	125	931.5	940.4	935.95	7.7	5.5	31.7	0.619	28	165.2	28	2	3.62146	11.4817	76.0218	0.823059	1.76135
12	7	11	125	931.5	940.4	935.95	7.7	5.5	31.7	0.619	28	165.2	28	2	3.62146	11.4817	76.0218	0.823059	2.88071
1	7	11	125	879.6	883.7	881.65	4.1	3.8	30.3	0.867	28	91.92	15	1	1.73456	11.6911	87.0802	0.626195	2.49852
2	7	11	125	879.6	883.7	881.65	4.1	3.8	30.3	0.867	28	91.92	15	1	1.73456	11.6911	87.0802	0.626195	5.68585
3	7	11	125	879.6	883.7	881.65	4.1	3.8	30.3	0.867	28	91.92	15	1	1.73456	11.6911	87.0802	0.626195	6.20559
4	7	11	125	879.6	883.7	881.65	4.1	3.8	30.3	0.867	28	91.92	15	1	1.73456	11.6911	87.0802	0.626195	2.92433
5	7	11	125	879.6	883.7	881.65	4.1	3.8	30.3	0.867	28	91.92	15	1	1.73456	11.6911	87.0802	0.626195	1.77213
6	7	11	125	879.6	883.7	881.65	4.1	3.8	30.3	0.867	28	91.92	15	1	1.73456	11.6911	87.0802	0.626195	1.89111
7	7	11	125	879.6	883.7	881.65	4.1	3.8	30.3	0.867	28	91.92	15	1	1.73456	11.6911	87.0802	0.626195	3.31257
8	7	11	125	879.6	883.7	881.65	4.1	3.8	30.3	0.867	28	91.92	15	1	1.73456	11.6911	87.0802	0.626195	2.78657
9	7	11	125	879.6	883.7	881.65	4.1	3.8	30.3	0.867	28	91.92	15	1	1.73456	11.6911	87.0802	0.626195	3.34388
10	7	11	125	879.6	883.7	881.65	4.1	3.8	30.3	0.867	28	91.92	15	1	1.73456	11.6911	87.0802	0.626195	1.92242
11	7	11	125	879.6	883.7	881.65	4.1	3.8	30.3	0.867	28	91.92	15	1	1.73456	11.6911	87.0802	0.626195	1.35258
12	7	11	125	879.6	883.7	881.65	4.1	3.8	30.3	0.867	28	91.92	15	1	1.73456	11.6911	87.0802	0.626195	0.0125239
1	7	10.22	175	1082.2	1087.8	1085	4.1	3	28.9	0.367	29	165.84	27	1	0.534859	11.2118	95.4467	0.289113	0.335371
2	7	10.22	175	1082.2	1087.8	1085	4.1	3	28.9	0.367	29	165.84	27	1	0.534859	11.2118	95.4467	0.289113	0.234182
3	7	10.22	175	1082.2	1087.8	1085	4.1	3	28.9	0.367	29	165.84	27	1	0.534859	11.2118	95.4467	0.289113	0.346936
4	7	10.22	175	1082.2	1087.8	1085	4.1	3	28.9	0.367	29	165.84	27	1	0.534859	11.2118	95.4467	0.289113	0.329589
5	7	10.22	175	1082.2	1087.8	1085	4.1	3	28.9	0.367	29	165.84	27	1	0.534859	11.2118	95.4467	0.289113	0.413432
6	7	10.22	175	1082.2	1087.8	1085	4.1	3	28.9	0.367	29	165.84	27	1	0.534859	11.2118	95.4467	0.289113	0.300677
7	7	10.22	175	1082.2	1087.8	1085	4.1	3	28.9	0.367	29	165.84	27	1	0.534859	11.2118	95.4467	0.289113	0.112754
8	7	10.22	175	1082.2	1087.8	1085	4.1	3	28.9	0.367	29	165.84	27	1	0.534859	11.2118	95.4467	0.289113	0.74302
9	7	10.22	175	1082.2	1087.8	1085	4.1	3	28.9	0.367	29	165.84	27	1	0.534859	11.2118	95.4467	0.289113	0.821081
10	7	10.22	175	1082.2	1087.8	1085	4.1	3	28.9	0.367	29	165.84	27	1	0.534859	11.2118	95.4467	0.289113	0.503057
11	7	10.22	175	1082.2	1087.8	1085	4.1	3	28.9	0.367	29	165.84	27	1	0.534859	11.2118	95.4467	0.289113	0.193706
12	7	10.22	175	1082.2	1087.8	1085	4.1	3	28.9	0.367	29	165.84	27	1	0.534859	11.2118	95.4467	0.289113	0.190815
1	7	9.59	150	906.6	916.2	911.4	9.6	8.3	30.6	0.573	27	70	12	1	1.73326	24.3534	93.3557	0.515852	1.2432
2	7	9.59	150	906.6	916.2	911.4	9.6	8.3	30.6	0.573	27	70	12	1	1.73326	24.3534	93.3557	0.515852	1.00591
3	7	9.59	150	906.6	916.2	911.4	9.6	8.3	30.6	0.573	27	70	12	1	1.73326	24.3534	93.3557	0.515852	1.71263
4	7	9.59	150	906.6	916.2	911.4	9.6	8.3	30.6	0.573	27	70	12	1	1.73326	24.3534	93.3557	0.515852	1.98087
5	7	9.59	150	906.6	916.2	911.4	9.6	8.3	30.6	0.573	27	70	12	1	1.73326	24.3534	93.3557	0.515852	1.07297
6	7	9.59	150	906.6	916.2	911.4	9.6	8.3	30.6	0.573	27	70	12	1	1.73326	24.3534	93.3557	0.515852	1.5424
7	7	9.59	150	906.6	916.2	911.4	9.6	8.3	30.6	0.573	27	70	12	1	1.73326	24.3534	93.3557	0.515852	0.753144
8	7	9.59	150	906.6	916.2	911.4	9.6	8.3	30.6	0.573	27	70	12	1	1.73326	24.3534	93.3557	0.515852	0.62934
9	7	9.59	150	906.6	916.2	911.4	9.6	8.3	30.6	0.573	27	70	12	1	1.73326	24.3534	93.3557	0.515852	0.969802
10	7	9.59	150	906.6	916.2	911.4	9.6	8.3	30.6	0.573	27	70	12	1	1.73326	24.3534	93.3557	0.515852	0.536486
11	7	9.59	150	906.6	916.2	911.4	9.6	8.3	30.6	0.573	27	70	12	1	1.73326	24.3534	93.3557	0.515852	0.443633
1	7	12.1	175	941.3	947.2	944.25	5.9	5.5	30.2	0.977	31	117.72	19	1	2.33074	22.5835	90.645	0.795473	0.493193
2	7	12.1	175	941.3	947.2	944.25	5.9	5.5	30.2	0.977	31	117.72	19	1	2.33074	22.5835	90.645	0.795473	0.087502
3	7	12.1	175	941.3	947.2	944.25	5.9	5.5	30.2	0.977	31	117.72	19	1	2.33074	22.5835	90.645	0.795473	0.0954568
4	7	12.1	175	941.3	947.2	944.25	5.9	5.5	30.2	0.977	31	117.72	19	1	2.33074	22.5835	90.645	0.795473	0.89093
5	7	12.1	175	941.3	947.2	944.25	5.9	5.5	30.2	0.977	31	117.72	19	1	2.33074	22.5835	90.645	0.795473	1.3523
6	7	12.1	175	941.3	947.2	944.25	5.9	5.5	30.2	0.977	31	117.72	19	1	2.33074	22.5835	90.645	0.795473	0.978432
7	7	12.1	175	941.3	947.2	944.25	5.9	5.5	30.2	0.977	31	117.72	19	1	2.33074	22.5835	90.645	0.795473	0.906839
8	7	12.1	175	941.3	947.2	944.25	5.9	5.5	30.2	0.977	31	117.72	19	1	2.33074	22.5835	90.645	0.795473	2.78416
9	7	12.1	175	941.3	947.2	944.25	5.9	5.5	30.2	0.977	31	117.72	19	1	2.33074	22.5835	90.645	0.795473	2.78416
10	7	12.1	175	941.3	947.2	944.25	5.9	5.5	30.2	0.977	31	117.72	19	1	2.33074	22.5835	90.645	0.795473	1.32049
11	7	12.1	175	941.3	947.2	944.25	5.9	5.5	30.2	0.977	31	117.72	19	1	2.33074	22.5835	90.645	0.795473	0.676152
1	7	10.21	125	915.4	923.8	919.6	8.4	7.4	31.6	1.048	28	78.96	13.5	1	1.92022	17.7208	90.2235	0.685791	5.47947
2	7	10.21	125	915.4	923.8	919.6	8.4	7.4	31.6	1.048	28	78.96	13.5	1	1.92022	17.7208	90.2235	0.685791	6.69332
3	7	10.21	125	915.4	923.8	919.6	8.4	7.4	31.6	1.048	28	78.96	13.5	1	1.92022	17.7208	90.2235	0.685791	3.49068
4	7	10.21	125	915.4	923.8	919.6	8.4	7.4	31.6	1.048	28	78.96	13.5	1	1.92022	17.7208	90.2235	0.685791	4.19704
5	7	10.21	125	915.4	923.8	919.6	8.4	7.4	31.6	1.048	28	78.96	13.5	1	1.92022	17.7208	90.2235	0.685791	5.12286
6	7	10.21	125	915.4	923.8	919.6	8.4	7.4	31.6	1.048	28	78.96	13.5	1	1.92022	17.7208	90.2235	0.685791	5.34917
7	7	10.21	125	915.4	923.8	919.6	8.4	7.4	31.6	1.048	28	78.96	13.5	1	1.92022	17.7208	90.2235	0.685791	5.49319
8	7	10.21	125	915.4	923.8	919.6	8.4	7.4	31.6	1.048	28	78.96	13.5	1	1.92022	17.7208	90.2235	0.685791	4.9857
9	7	10.21	125	915.4	923.8	919.6	8.4	7.4	31.6	1.048	28	78.96	13.5	1	1.92022	17.7208	90.2235	0.685791	4.29991
10	7	10.21	125	915.4	923.8	919.6	8.4	7.4	31.6	1.048	28	78.96	13.5	1	1.92022	17.7208	90.2235	0.685791	4.86912
11	7	10.21	125	915.4	923.8	919.6	8.4	7.4	31.6	1.048	28	78.96	13.5	1	1.92022	17.7208	90.2235	0.685791	5.64406
12	7	10.21	125	915.4	923.8	919.6	8.4	7.4	31.6	1.048	28	78.96	13.5	1	1.92022	17.7208	90.2235	0.685791	3.95701
1	7	9.23	175	1061.4	1069.6	1065.5	7.1	3.5	29.7	1.019	31	225.2	37	2	1.45211	23.5673	94.196	0.358547	0.358547
2	7	9.23	175	1061.4	1069.6	1065.5	7.1	3.5	29.7	1.019	31	225.2	37	2	1.45211	23.5673	94.196	0.358547	0.243812
3	7	9.23	175	1061.4	1069.6	1065.5	7.1	3.5	29.7	1.019	31	225.2	37	2	1.45211	23.5673	94.196	0.358547	0.512722
4	7	9.23	175	1061.4	1069.6	1065.5	7.1	3.5	29.7	1.019	31	225.2	37	2	1.45211	23.5673	94.196	0.358547	0.921465
5	7	9.23	175	1061.4	1069.6	1065.5	7.1	3.5	29.7	1.019	31	225.2	37	2	1.45211	23.5673	94.196	0.358547	0.810316
6	7	9.23	175	1061.4	1069.6	1065.5	7.1	3.5	29.7	1.019	31	225.2	37	2	1.45211	23.5673	94.196	0.358547	0.641799
7	7	9.23	175	1061.4	1069.6	1065.5	7.1	3.5	29.7	1.019	31	225.2	37	2	1.45211	23.5673	94.196	0.358547	0.824657
8	7	9.23	175	1061.4	1069.6	1065.5	7.1	3.5	29.7	1.019	31	225.2	37	2	1.45211	23.5673	94.196	0.358547	1.03979
9	7	9.23	175	1061.4	1069.6	1065.5	7.1	3.5	29.7	1.019	31	225.2	37	2	1.45211	23.5673	94.196	0.358547	0.745777
10	7	9.23	175	1061.4	1069.6	1065.5	7.1	3.5	29.7	1.019	31	225.2	37	2	1.45211	23.5673	94.196	0.358547	0.26891
11	7	9.23	175	1061.4	1069.6	1065.5	7.1	3.5	29.7	1.019	31	225.2	37	2	1.45211	23.5673	94.196	0.358547	0.11832
1	7	9.23	175	1075.4	1084	1079.7	8.6	6.6	29.3	0.894	27	114.8	19	1	2.40237	38.9896	94.196	0.593178	0.593178
2	7	9.23	175	1075.4	1084	1079.7	8.6	6.6	29.3	0.894	27	114.8	19	1	2.40237	38.9896	94.196	0.593178	0.403361
3	7	9.23	175	1075.4	1084	1079.7	8.6	6.6	29.3	0.894	27	114.8	19	1	2.40237	38.9896	94.196	0.593178	0.848244
4	7	9.23	175	1075.4	1084	1079.7	8.6	6.6	29.3	0.894	27	114.8	19	1	2.40237	38.9896	94.196	0.593178	1.52447
5	7	9.23	175	1075.4	1084	1079.7	8.6	6.6	29.3	0.894	27	114.8	19	1	2.40237	38.9896	94.196	0.593178	1.34058
6	7	9.23	175	1075.4	1084	1079.7	8.6	6.6	29.3	0.894	27	114.8	19	1	2.40237	38.9896	94.196	0.593178	1.06179
7	7	9.23	175	1075.4	1084	1079.7	8.6	6.6	29.3	0.894	27	114.8	19	1	2.40237	38.9896	94.196	0.593178	1.36431
8	7	9.23	175	1075.4	1084	1079.7	8.6	6.6	29.3	0.894	27	114.8	19	1	2.40237	38.9896	94.196	0.593178	1.72022
9	7	9.23	175	1075.4	1084	1079.7	8.6	6.6	29.3	0.894	27	114.8	19	1	2.40237	38.9896	94.196	0.593178	1.23381
10	7	9.23	175	1075.4	1084	1079.7	8.6	6.6	29.3	0.894	27	114.8	19	1	2.40237	38.9896	94.196	0.593178	0.444883
11	7	9.23	175	1075.4	1084	1079.7	8.6	6.6	29.3	0.894	27	114.8	19	1	2.40237	38.9896	94.196	0.593178	0.195749
1	7	11	125	894.8	898.2	896.5	3.4	2.7	31.6	0.772	29	80	14	1	1.35601	9.41549	87.4111	0.283684	2.556
2	7	11	125	894.8	898.2	896.5	3.4	2.7	31.6	0.772	29	80	14	1	1.35601	9.41549	87.4111	0.283684	3.49783
3	7	11	125	894.8	898.2	896.5	3.4	2.7	31.6	0.772	29	80	14	1	1.35601	9.41549	87.4111	0.283684	3.23117
4	7	11	125	894.8	898.2	896.5	3.4	2.7	31.6	0.772	29	80	14	1	1.35601	9.41549	87.4111	0.283684	4.11626
5	7	11	125	894.8	898.2	896.5	3.4	2.7	31.6	0.772	29	80	14	1	1.35601	9.41549	87.4111	0.283684	4.29782
6	7	11	125	894.8	898.2	896.5	3.4	2.7	31.6	0.772	29	80	14	1	1.35601	9.41549	87.4111	0.283684	3.33897
7	7	11	125	894.8	898.2	896.5	3.4	2.7	31.6	0.772	29	80	14	1	1.35601	9.41549	87.4111	0.283684	3.82407
8	7	11	125	894.8	898.2	896.5	3.4	2.7	31.6	0.772	29	80	14	1	1.35601	9.41549	87.4111	0.283684	3.65669
9	7	11	125	894.8	898.2	896.5	3.4	2.7	31.6	0.772	29	80	14	1	1.35601	9.41549	87.4111	0.283684	3.57159
10	7	11	125	894.8	898.2	896.5	3.4	2.7	31.6	0.772	29	80	14	1	1.35601	9.41549	87.4111	0.283684	2.5333
11	7	11	125	894.8	898.2	896.5	3.4	2.7	31.6	0.772	29	80	14	1	1.35601	9.41549	87.4111	0.283684	1.59147
1	7	11	125	904.3	910.5	907.4	6.2	4.5	31.3	0.861	30	80	14	1	2.52057	17.5016	87.4111	0.527315	4.75111
2	7	11	125	904.3	910.5	907.4	6.2	4.5	31.3	0.861	30	80	14	1	2.52057	17.5016	87.4111	0.527315	6.50179
3	7	11	125	904.3	910.5	907.4	6.2	4.5	31.3	0.861	30	80	14	1	2.52057	17.5016	87.4111	0.527315	6.00612
4	7	11	125	904.3	910.5	907.4	6.2	4.5	31.3	0.861	30	80	14	1	2.52057	17.5016	87.4111	0.527315	7.65134
5	7	11	125	904.3	910.5	907.4	6.2	4.5	31.3	0.861	30	80	14	1	2.52057	17.5016	87.4111	0.527315	7.98882
6	7	11	125	904.3	910.5	907.4	6.2	4.5	31.3	0.861	30	80	14	1	2.52057	17.5016	87.4111	0.527315	6.2065
7	7	11	125	904.3	910.5	907.4	6.2	4.5	31.3	0.861	30	80	14	1	2.52057	17.5016	87.4111	0.527315	7.10821
8	7	11	125	904.3	910.5	907.4	6.2	4.5	31.3	0.861	30	80	14	1	2.52057	17.5016	87.4111	0.527315	6.79709
9	7	11	125	904.3	910.5	907.4	6.2	4.5	31.3	0.861	30	80	14	1	2.52057	17.5016	87.4111	0.527315	6.6389
10	7	11	125	904.3	910.5	907.4	6.2	4.5	31.3	0.861	30	80	14	1	2.52057	17.5016	87.4111	0.527315	4.70892
11	7	11	125	904.3	910.5	907.4	6.2	4.5	31.3	0.861	30	80	14	1	2.52057	17.5016	87.4111	0.527315	2.95824
1	7	8.98	125	959.5	967.1	963.3	6.8	3.4	31.7	0.504	35	205.94	33	2	0.981767	20.0396	95.3297	0.641678	2.0277
1	7	10.21	125	916.2	922.7	919.45	6.1	4.5	31.6	0.903	0	132.44	27	2	1.97589	15.5163	88.7041	0.461656	0.701718
2	7	10.21	125	916.2	922.7	919.45	6.1	4.5	31.6	0.903	0	132.44	27	2	1.97589	15.5163	88.7041	0.461656	1.63426
3	7	10.21	125	916.2	922.7	919.45	6.1	4.5	31.6	0.903	0	132.44	27	2	1.97589	15.5163	88.7041	0.461656	1.88356
4	7	10.21	125	916.2	922.7	919.45	6.1	4.5	31.6	0.903	0	132.44	27	2	1.97589	15.5163	88.7041	0.461656	1.4219
5	7	10.21	125	916.2	922.7	919.45	6.1	4.5	31.6	0.903	0	132.44	27	2	1.97589	15.5163	88.7041	0.461656	1.53732
6	7	10.21	125	916.2	922.7	919.45	6.1	4.5	31.6	0.903	0	132.44	27	2	1.97589	15.5163	88.7041	0.461656	1.19107
7	7	10.21	125	916.2	922.7	919.45	6.1	4.5	31.6	0.903	0	132.44	27	2	1.97589	15.5163	88.7041	0.461656	0.553988
8	7	10.21	125	916.2	922.7	919.45	6.1	4.5	31.6	0.903	0	132.44	27	2	1.97589	15.5163	88.7041	0.461656	1.09874
9	7	10.21	125	916.2	922.7	919.45	6.1	4.5	31.6	0.903	0	132.44	27	2	1.97589	15.5163	88.7041	0.461656	1.27879
10	7	10.21	125	916.2	922.7	919.45	6.1	4.5	31.6	0.903	0	132.44	27	2	1.97589	15.5163	88.7041	0.461656	1.38959
11	7	10.21	125	916.2	922.7	919.45	6.1	4.5	31.6	0.903	0	132.44	27	2	1.97589	15.5163	88.7041	0.461656	0.987945
1	7	10.21	125	936.3	943	939.65	6.7	5.2	31.7	0.858	22	93.72	15	1	3.98698	26.592	86.9617	0.908195	4.65904
2	7	10.21	125	936.3	943	939.65	6.7	5.2	31.7	0.858	22	93.72	15	1	3.98698	26.592	86.9617	0.908195	3.38757
3	7	10.21	125	936.3	943	939.65	6.7	5.2	31.7	0.858	22	93.72	15	1	3.98698	26.592	86.9617	0.908195	2.23416
4	7	10.21	125	936.3	943	939.65	6.7	5.2	31.7	0.858	22	93.72	15	1	3.98698	26.592	86.9617	0.908195	5.6853
5	7	10.21	125	936.3	943	939.65	6.7	5.2	31.7	0.858	22	93.72	15	1	3.98698	26.592	86.9617	0.908195	4.84068
6	7	10.21	125	936.3	943	939.65	6.7	5.2	31.7	0.858	22	93.72	15	1	3.98698	26.592	86.9617	0.908195	6.15756
7	7	10.21	125	936.3	943	939.65	6.7	5.2	31.7	0.858	22	93.72	15	1	3.98698	26.592	86.9617	0.908195	6.06674
8	7	10.21	125	936.3	943	939.65	6.7	5.2	31.7	0.858	22	93.72	15	1	3.98698	26.592	86.9617	0.908195	4.68629
9	7	10.21	125	936.3	943	939.65	6.7	5.2	31.7	0.858	22	93.72	15	1	3.98698	26.592	86.9617	0.908195	17.8551
10	7	10.21	125	936.3	943	939.65	6.7	5.2	31.7	0.858	22	93.72	15	1	3.98698	26.592	86.9617	0.908195	14.631
11	7	10.21	125	936.3	943	939.65	6.7	5.2	31.7	0.858	22	93.72	15	1	3.98698	26.592	86.9617	0.908195	9.01838
12	7	10.21	125	936.3	943	939.65	6.7	5.2	31.7	0.858	22	93.72	15	1	3.98698	26.592	86.9617	0.908195	10.0356
1	7	8.65	150	1013.5	1018.9	1016.2	5.4	4.1	31.2	0.661	26	70	11.5	1	0.541927	15.0758	96.5301	0.467178	1.19598
2	7	8.65	150	1013.5	1018.9	1016.2	5.4	4.1	31.2	0.661	26	70	11.5	1	0.541927	15.0758	96.5301	0.467178	2.09296
3	7	8.65	150	1013.5	1018.9	1016.2	5.4	4.1	31.2	0.661	26	70	11.5	1	0.541927	15.0758	96.5301	0.467178	1.75659
4	7	8.65	150	1013.5	1018.9	1016.2	5.4	4.1	31.2	0.661	26	70	11.5	1	0.541927	15.0758	96.5301	0.467178	1.93879
5	7	8.65	150	1013.5	1018.9	1016.2	5.4	4.1	31.2	0.661	26	70	11.5	1	0.541927	15.0758	96.5301	0.467178	2.04157
6	7	8.65	150	1013.5	1018.9	1016.2	5.4	4.1	31.2	0.661	26	70	11.5	1	0.541927	15.0758	96.5301	0.467178	1.80798
7	7	8.65	150	1013.5	1018.9	1016.2	5.4	4.1	31.2	0.661	26	70	11.5	1	0.541927	15.0758	96.5301	0.467178	1.23335
8	7	8.65	150	1013.5	1018.9	1016.2	5.4	4.1	31.2	0.661	26	70	11.5	1	0.541927	15.0758	96.5301	0.467178	1.58373
9	7	8.65	150	1013.5	1018.9	1016.2	5.4	4.1	31.2	0.661	26	70	11.5	1	0.541927	15.0758	96.5301	0.467178	1.44358
10	7	8.65	150	1013.5	1018.9	1016.2	5.4	4.1	31.2	0.661	26	70	11.5	1	0.541927	15.0758	96.5301	0.467178	1.83134
11	7	8.65	150	1013.5	1018.9	1016.2	5.4	4.1	31.2	0.661	26	70	11.5	1	0.541927	15.0758	96.5301	0.467178	1.22868
12	7	8.65	150	1013.5	1018.9	1016.2	5.4	4.1	31.2	0.661	26	70	11.5	1	0.541927	15.0758	96.5301	0.467178	1.1259
1	7	8.65	150	1035.2	1037.9	1036.55	2.7	2.3	31.1	0.857	30	85	15	1	0.394152	10.9649	96.5301	0.339786	0.869853
2	7	8.65	150	1035.2	1037.9	1036.55	2.7	2.3	31.1	0.857	30	85	15	1	0.394152	10.9649	96.5301	0.339786	1.52224
3	7	8.65	150	1035.2	1037.9	1036.55	2.7	2.3	31.1	0.857	30	85	15	1	0.394152	10.9649	96.5301	0.339786	1.2776
4	7	8.65	150	1035.2	1037.9	1036.55	2.7	2.3	31.1	0.857	30	85	15	1	0.394152	10.9649	96.5301	0.339786	1.41011
5	7	8.65	150	1035.2	1037.9	1036.55	2.7	2.3	31.1	0.857	30	85	15	1	0.394152	10.9649	96.5301	0.339786	1.48487
6	7	8.65	150	1035.2	1037.9	1036.55	2.7	2.3	31.1	0.857	30	85	15	1	0.394152	10.9649	96.5301	0.339786	1.31497
7	7	8.65	150	1035.2	1037.9	1036.55	2.7	2.3	31.1	0.857	30	85	15	1	0.394152	10.9649	96.5301	0.339786	0.897036
8	7	8.65	150	1035.2	1037.9	1036.55	2.7	2.3	31.1	0.857	30	85	15	1	0.394152	10.9649	96.5301	0.339786	1.15188
9	7	8.65	150	1035.2	1037.9	1036.55	2.7	2.3	31.1	0.857	30	85	15	1	0.394152	10.9649	96.5301	0.339786	1.04994
10	7	8.65	150	1035.2	1037.9	1036.55	2.7	2.3	31.1	0.857	30	85	15	1	0.394152	10.9649	96.5301	0.339786	1.33196
11	7	8.65	150	1035.2	1037.9	1036.55	2.7	2.3	31.1	0.857	30	85	15	1	0.394152	10.9649	96.5301	0.339786	0.893638
12	7	8.65	150	1035.2	1037.9	1036.55	2.7	2.3	31.1	0.857	30	85	15	1	0.394152	10.9649	96.5301	0.339786	0.818885
1	7	9.73	150	1118	1128.4	1123.2	9.3	7.1	29.5	0.519	35	109.16	17	2	0.844561	17.5414	95.4065	0.747399	4.64135
2	7	9.73	150	1118	1128.4	1123.2	9.3	7.1	29.5	0.519	35	109.16	17	2	0.844561	17.5414	95.4065	0.747399	6.70417
3	7	9.73	150	1118	1128.4	1123.2	9.3	7.1	29.5	0.519	35	109.16	17	2	0.844561	17.5414	95.4065	0.747399	6.0614
4	7	9.73	150	1118	1128.4	1123.2	9.3	7.1	29.5	0.519	35	109.16	17	2	0.844561	17.5414	95.4065	0.747399	4.81325
5	7	9.73	150	1118	1128.4	1123.2	9.3	7.1	29.5	0.519	35	109.16	17	2	0.844561	17.5414	95.4065	0.747399	4.17796
6	7	9.73	150	1118	1128.4	1123.2	9.3	7.1	29.5	0.519	35	109.16	17	2	0.844561	17.5414	95.4065	0.747399	3.52772
7	7	9.73	150	1118	1128.4	1123.2	9.3	7.1	29.5	0.519	35	109.16	17	2	0.844561	17.5414	95.4065	0.747399	2.67569
8	7	9.73	150	1118	1128.4	1123.2	9.3	7.1	29.5	0.519	35	109.16	17	2	0.844561	17.5414	95.4065	0.747399	2.40662
9	7	9.73	150	1118	1128.4	1123.2	9.3	7.1	29.5	0.519	35	109.16	17	2	0.844561	17.5414	95.4065	0.747399	2.00303
10	7	9.73	150	1118	1128.4	1123.2	9.3	7.1	29.5	0.519	35	109.16	17	2	0.844561	17.5414	95.4065	0.747399	1.88344
11	7	9.73	150	1118	1128.4	1123.2	9.3	7.1	29.5	0.519	35	109.16	17	2	0.844561	17.5414	95.4065	0.747399	1.75639
1	7	9.65	150	1149.5	1162.7	1156.1	12.6	11.3	30.1	0.543	25	144.24	17	2	1.49994	48.3422	96.9906	0.882317	0.741147
2	7	9.65	150	1149.5	1162.7	1156.1	12.6	11.3	30.1	0.543	25	144.24	17	2	1.49994	48.3422	96.9906	0.882317	2.64695
3	7	9.65	150	1149.5	1162.7	1156.1	12.6	11.3	30.1	0.543	25	144.24	17	2	1.49994	48.3422	96.9906	0.882317	1.447
4	7	9.65	150	1149.5	1162.7	1156.1	12.6	11.3	30.1	0.543	25	144.24	17	2	1.49994	48.3422	96.9906	0.882317	1.60582
5	7	9.65	150	1149.5	1162.7	1156.1	12.6	11.3	30.1	0.543	25	144.24	17	2	1.49994	48.3422	96.9906	0.882317	3.07929
6	7	9.65	150	1149.5	1162.7	1156.1	12.6	11.3	30.1	0.543	25	144.24	17	2	1.49994	48.3422	96.9906	0.882317	2.47931
7	7	9.65	150	1149.5	1162.7	1156.1	12.6	11.3	30.1	0.543	25	144.24	17	2	1.49994	48.3422	96.9906	0.882317	2.45284
8	7	9.65	150	1149.5	1162.7	1156.1	12.6	11.3	30.1	0.543	25	144.24	17	2	1.49994	48.3422	96.9906	0.882317	1.48229
9	7	9.65	150	1149.5	1162.7	1156.1	12.6	11.3	30.1	0.543	25	144.24	17	2	1.49994	48.3422	96.9906	0.882317	1.79993
10	7	9.65	150	1149.5	1162.7	1156.1	12.6	11.3	30.1	0.543	25	144.24	17	2	1.49994	48.3422	96.9906	0.882317	0.926433
11	7	9.65	150	1149.5	1162.7	1156.1	12.6	11.3	30.1	0.543	25	144.24	17	2	1.49994	48.3422	96.9906	0.882317	1.29701
1	7	9.76	125	931.3	936.2	933.75	4.9	4.2	31.6	0.93	28	50	8.5	1	2.79098	15.6907	84.8987	0.527595	0.480112
2	7	9.76	125	931.3	936.2	933.75	4.9	4.2	31.6	0.93	28	50	8.5	1	2.79098	15.6907	84.8987	0.527595	2.46387
3	7	9.76	125	931.3	936.2	933.75	4.9	4.2	31.6	0.93	28	50	8.5	1	2.79098	15.6907	84.8987	0.527595	2.59049
4	7	9.76	125	931.3	936.2	933.75	4.9	4.2	31.6	0.93	28	50	8.5	1	2.79098	15.6907	84.8987	0.527595	2.84374
5	7	9.76	125	931.3	936.2	933.75	4.9	4.2	31.6	0.93	28	50	8.5	1	2.79098	15.6907	84.8987	0.527595	3.0284
6	7	9.76	125	931.3	936.2	933.75	4.9	4.2	31.6	0.93	28	50	8.5	1	2.79098	15.6907	84.8987	0.527595	2.36363
7	7	9.76	125	931.3	936.2	933.75	4.9	4.2	31.6	0.93	28	50	8.5	1	2.79098	15.6907	84.8987	0.527595	3.28164
1	7	10.01	150	996.2	999.7	997.95	3.5	2.5	31.7	0.548	32	70	11.5	1	0.589548	12.2215	95.3981	0.38786	0.651605
2	7	10.01	150	996.2	999.7	997.95	3.5	2.5	31.7	0.548	32	70	11.5	1	0.589548	12.2215	95.3981	0.38786	0.33356
3	7	10.01	150	996.2	999.7	997.95	3.5	2.5	31.7	0.548	32	70	11.5	1	0.589548	12.2215	95.3981	0.38786	0.213323
4	7	10.01	150	996.2	999.7	997.95	3.5	2.5	31.7	0.548	32	70	11.5	1	0.589548	12.2215	95.3981	0.38786	0.228838
5	7	10.01	150	996.2	999.7	997.95	3.5	2.5	31.7	0.548	32	70	11.5	1	0.589548	12.2215	95.3981	0.38786	0.391739
6	7	10.01	150	996.2	999.7	997.95	3.5	2.5	31.7	0.548	32	70	11.5	1	0.589548	12.2215	95.3981	0.38786	0.329681
7	7	10.01	150	996.2	999.7	997.95	3.5	2.5	31.7	0.548	32	70	11.5	1	0.589548	12.2215	95.3981	0.38786	0.217202
8	7	10.01	150	996.2	999.7	997.95	3.5	2.5	31.7	0.548	32	70	11.5	1	0.589548	12.2215	95.3981	0.38786	0.13963
9	7	10.01	150	996.2	999.7	997.95	3.5	2.5	31.7	0.548	32	70	11.5	1	0.589548	12.2215	95.3981	0.38786	0.190052
10	7	10.01	150	996.2	999.7	997.95	3.5	2.5	31.7	0.548	32	70	11.5	1	0.589548	12.2215	95.3981	0.38786	0.0620576
11	7	10.01	150	996.2	999.7	997.95	3.5	2.5	31.7	0.548	32	70	11.5	1	0.589548	12.2215	95.3981	0.38786	0.0853293
12	7	10.01	150	996.2	999.7	997.95	3.5	2.5	31.7	0.548	32	70	11.5	1	0.589548	12.2215	95.3981	0.38786	0.0543004
1	7	10.21	125	909.6	913.6	911.6	4	3.6	31.4	0.661	34	82.6	13.5	1	2.02568	13.4524	86.9126	0.422897	1.25178
2	7	10.21	125	909.6	913.6	911.6	4	3.6	31.4	0.661	34	82.6	13.5	1	2.02568	13.4524	86.9126	0.422897	0.828878
3	7	10.21	125	909.6	913.6	911.6	4	3.6	31.4	0.661	34	82.6	13.5	1	2.02568	13.4524	86.9126	0.422897	0.401752
4	7	10.21	125	909.6	913.6	911.6	4	3.6	31.4	0.661	34	82.6	13.5	1	2.02568	13.4524	86.9126	0.422897	0.279112
5	7	10.21	125	909.6	913.6	911.6	4	3.6	31.4	0.661	34	82.6	13.5	1	2.02568	13.4524	86.9126	0.422897	0.0296028
6	7	10.21	125	909.6	913.6	911.6	4	3.6	31.4	0.661	34	82.6	13.5	1	2.02568	13.4524	86.9126	0.422897	0.503248
7	7	10.21	125	909.6	913.6	911.6	4	3.6	31.4	0.661	34	82.6	13.5	1	2.02568	13.4524	86.9126	0.422897	0.583598
8	7	10.21	125	909.6	913.6	911.6	4	3.6	31.4	0.661	34	82.6	13.5	1	2.02568	13.4524	86.9126	0.422897	0.0718925
1	7	10.21	125	912.6	922	917.3	7.8	5.6	31.6	0.819	29	155.08	27	2	2.01338	16.1992	88.9451	0.708937	3.4029
2	7	10.21	125	912.6	922	917.3	7.8	5.6	31.6	0.819	29	155.08	27	2	2.01338	16.1992	88.9451	0.708937	3.01298
3	7	10.21	125	912.6	922	917.3	7.8	5.6	31.6	0.819	29	155.08	27	2	2.01338	16.1992	88.9451	0.708937	3.97714
4	7	10.21	125	912.6	922	917.3	7.8	5.6	31.6	0.819	29	155.08	27	2	2.01338	16.1992	88.9451	0.708937	4.34579
5	7	10.21	125	912.6	922	917.3	7.8	5.6	31.6	0.819	29	155.08	27	2	2.01338	16.1992	88.9451	0.708937	5.04763
6	7	10.21	125	912.6	922	917.3	7.8	5.6	31.6	0.819	29	155.08	27	2	2.01338	16.1992	88.9451	0.708937	4.46631
7	7	10.21	125	912.6	922	917.3	7.8	5.6	31.6	0.819	29	155.08	27	2	2.01338	16.1992	88.9451	0.708937	3.75028
8	7	10.21	125	912.6	922	917.3	7.8	5.6	31.6	0.819	29	155.08	27	2	2.01338	16.1992	88.9451	0.708937	3.70065
9	7	10.21	125	912.6	922	917.3	7.8	5.6	31.6	0.819	29	155.08	27	2	2.01338	16.1992	88.9451	0.708937	3.49506
10	7	10.21	125	912.6	922	917.3	7.8	5.6	31.6	0.819	29	155.08	27	2	2.01338	16.1992	88.9451	0.708937	1.71563
11	7	10.21	125	912.6	922	917.3	7.8	5.6	31.6	0.819	29	155.08	27	2	2.01338	16.1992	88.9451	0.708937	1.21937
12	7	10.21	125	912.6	922	917.3	7.8	5.6	31.6	0.819	29	155.08	27	2	2.01338	16.1992	88.9451	0.708937	1.14139
1	7	10.16	125	919.5	934	926.75	12.1	10.3	28.6	0.404	0	168.92	27	2	5.03806	27.3023	84.4218	0.733342	0.315337
2	7	10.16	125	919.5	934	926.75	12.1	10.3	28.6	0.404	0	168.92	27	2	5.03806	27.3023	84.4218	0.733342	1.63535
3	7	10.16	125	919.5	934	926.75	12.1	10.3	28.6	0.404	0	168.92	27	2	5.03806	27.3023	84.4218	0.733342	0.828676
4	7	10.16	125	919.5	934	926.75	12.1	10.3	28.6	0.404	0	168.92	27	2	5.03806	27.3023	84.4218	0.733342	0.982678
5	7	10.16	125	919.5	934	926.75	12.1	10.3	28.6	0.404	0	168.92	27	2	5.03806	27.3023	84.4218	0.733342	1.59868
6	7	10.16	125	919.5	934	926.75	12.1	10.3	28.6	0.404	0	168.92	27	2	5.03806	27.3023	84.4218	0.733342	2.8967
7	7	10.16	125	919.5	934	926.75	12.1	10.3	28.6	0.404	0	168.92	27	2	5.03806	27.3023	84.4218	0.733342	0.814009
8	7	10.16	125	919.5	934	926.75	12.1	10.3	28.6	0.404	0	168.92	27	2	5.03806	27.3023	84.4218	0.733342	0.696674
1	7	10.21	125	931.2	938	934.6	6.8	6	32.4	0.75	24	93.72	15	1	4.55535	4.478	49.5718	0.8595	5.17419
2	7	10.21	125	931.2	938	934.6	6.8	6	32.4	0.75	24	93.72	15	1	4.55535	4.478	49.5718	0.8595	4.48659
3	7	10.21	125	931.2	938	934.6	6.8	6	32.4	0.75	24	93.72	15	1	4.55535	4.478	49.5718	0.8595	3.90213
4	7	10.21	125	931.2	938	934.6	6.8	6	32.4	0.75	24	93.72	15	1	4.55535	4.478	49.5718	0.8595	4.55535
5	7	10.21	125	931.2	938	934.6	6.8	6	32.4	0.75	24	93.72	15	1	4.55535	4.478	49.5718	0.8595	4.24593
6	7	10.21	125	931.2	938	934.6	6.8	6	32.4	0.75	24	93.72	15	1	4.55535	4.478	49.5718	0.8595	3.13718
7	7	10.21	125	931.2	938	934.6	6.8	6	32.4	0.75	24	93.72	15	1	4.55535	4.478	49.5718	0.8595	2.56131
8	7	10.21	125	931.2	938	934.6	6.8	6	32.4	0.75	24	93.72	15	1	4.55535	4.478	49.5718	0.8595	0.61884
1	7	10.21	125	987.3	997.7	992.5	9.5	7	32.2	1.299	28	113.9	17	2	0.547615	10.8947	95.2141	0.960728	9.31906
2	7	10.21	125	987.3	997.7	992.5	9.5	7	32.2	1.299	28	113.9	17	2	0.547615	10.8947	95.2141	0.960728	3.75645
3	7	10.21	125	987.3	997.7	992.5	9.5	7	32.2	1.299	28	113.9	17	2	0.547615	10.8947	95.2141	0.960728	3.57391
4	7	10.21	125	987.3	997.7	992.5	9.5	7	32.2	1.299	28	113.9	17	2	0.547615	10.8947	95.2141	0.960728	3.87173
5	7	10.21	125	987.3	997.7	992.5	9.5	7	32.2	1.299	28	113.9	17	2	0.547615	10.8947	95.2141	0.960728	2.52671
6	7	10.21	125	987.3	997.7	992.5	9.5	7	32.2	1.299	28	113.9	17	2	0.547615	10.8947	95.2141	0.960728	2.3826
7	7	10.21	125	987.3	997.7	992.5	9.5	7	32.2	1.299	28	113.9	17	2	0.547615	10.8947	95.2141	0.960728	2.97826
8	7	10.21	125	987.3	997.7	992.5	9.5	7	32.2	1.299	28	113.9	17	2	0.547615	10.8947	95.2141	0.960728	3.65077
9	7	10.21	125	987.3	997.7	992.5	9.5	7	32.2	1.299	28	113.9	17	2	0.547615	10.8947	95.2141	0.960728	5.284
10	7	10.21	125	987.3	997.7	992.5	9.5	7	32.2	1.299	28	113.9	17	2	0.547615	10.8947	95.2141	0.960728	3.2953
11	7	10.21	125	987.3	997.7	992.5	9.5	7	32.2	1.299	28	113.9	17	2	0.547615	10.8947	95.2141	0.960728	2.92061
12	7	10.21	125	987.3	997.7	992.5	9.5	7	32.2	1.299	28	113.9	17	2	0.547615	10.8947	95.2141	0.960728	5.36086
1	7	10.21	125	959.2	964.7	961.95	5.5	4.9	31.7	0.779	22	56.08	8.5	1	4.23505	19.8612	82.4244	0.750895	1.24649
2	7	10.21	125	959.2	964.7	961.95	5.5	4.9	31.7	0.779	22	56.08	8.5	1	4.23505	19.8612	82.4244	0.750895	0.180215
1	7	10.21	125	942.7	951.7	947.2	7.4	5.3	31.4	0.75	27	53.34	8.5	1	5.0483	24.3082	82.8035	0.734832	1.5211
2	7	10.21	125	942.7	951.7	947.2	7.4	5.3	31.4	0.75	27	53.34	8.5	1	5.0483	24.3082	82.8035	0.734832	1.66807
3	7	10.21	125	942.7	951.7	947.2	7.4	5.3	31.4	0.75	27	53.34	8.5	1	5.0483	24.3082	82.8035	0.734832	1.88117
4	7	10.21	125	942.7	951.7	947.2	7.4	5.3	31.4	0.75	27	53.34	8.5	1	5.0483	24.3082	82.8035	0.734832	2.43229
5	7	10.21	125	942.7	951.7	947.2	7.4	5.3	31.4	0.75	27	53.34	8.5	1	5.0483	24.3082	82.8035	0.734832	1.82238
2	7	10.21	125	965.2	972.9	969.05	7.7	5.3	31.4	0.582	24	65.02	11.5	1	0.124333	8.07626	98.4838	0.540579	0.600043
3	7	10.21	125	965.2	972.9	969.05	7.7	5.3	31.4	0.582	24	65.02	11.5	1	0.124333	8.07626	98.4838	0.540579	0.400029
4	7	10.21	125	965.2	972.9	969.05	7.7	5.3	31.4	0.582	24	65.02	11.5	1	0.124333	8.07626	98.4838	0.540579	0.427058
5	7	10.21	125	965.2	972.9	969.05	7.7	5.3	31.4	0.582	24	65.02	11.5	1	0.124333	8.07626	98.4838	0.540579	0.30813
6	7	10.21	125	965.2	972.9	969.05	7.7	5.3	31.4	0.582	24	65.02	11.5	1	0.124333	8.07626	98.4838	0.540579	0.0756811
1	7	10	150	888.6	903.8	896.2	14.3	12	31.6	1.05	31	243.21	37	2	3.11208	33.9354	91.5997	0.804156	4.1414
2	7	10	150	888.6	903.8	896.2	14.3	12	31.6	1.05	31	243.21	37	2	3.11208	33.9354	91.5997	0.804156	4.73648
3	7	10	150	888.6	903.8	896.2	14.3	12	31.6	1.05	31	243.21	37	2	3.11208	33.9354	91.5997	0.804156	4.35048
4	7	10	150	888.6	903.8	896.2	14.3	12	31.6	1.05	31	243.21	37	2	3.11208	33.9354	91.5997	0.804156	4.10924
5	7	10	150	888.6	903.8	896.2	14.3	12	31.6	1.05	31	243.21	37	2	3.11208	33.9354	91.5997	0.804156	2.82259
6	7	10	150	888.6	903.8	896.2	14.3	12	31.6	1.05	31	243.21	37	2	3.11208	33.9354	91.5997	0.804156	4.24594
7	7	10	150	888.6	903.8	896.2	14.3	12	31.6	1.05	31	243.21	37	2	3.11208	33.9354	91.5997	0.804156	2.23555
8	7	10	150	888.6	903.8	896.2	14.3	12	31.6	1.05	31	243.21	37	2	3.11208	33.9354	91.5997	0.804156	2.67784
9	7	10	150	888.6	903.8	896.2	14.3	12	31.6	1.05	31	243.21	37	2	3.11208	33.9354	91.5997	0.804156	2.89496
1	7	10.21	125	878.6	885.6	882.1	6.4	4.2	31.6	0.75	0	131.88	27	2	0.489589	15.2327	96.886	0.923754	4.91437
2	7	10.21	125	878.6	885.6	882.1	6.4	4.2	31.6	0.75	0	131.88	27	2	0.489589	15.2327	96.886	0.923754	5.57947
3	7	10.21	125	878.6	885.6	882.1	6.4	4.2	31.6	0.75	0	131.88	27	2	0.489589	15.2327	96.886	0.923754	5.36701
4	7	10.21	125	878.6	885.6	882.1	6.4	4.2	31.6	0.75	0	131.88	27	2	0.489589	15.2327	96.886	0.923754	5.39472
5	7	10.21	125	878.6	885.6	882.1	6.4	4.2	31.6	0.75	0	131.88	27	2	0.489589	15.2327	96.886	0.923754	4.26774
6	7	10.21	125	878.6	885.6	882.1	6.4	4.2	31.6	0.75	0	131.88	27	2	0.489589	15.2327	96.886	0.923754	3.39941
7	7	10.21	125	878.6	885.6	882.1	6.4	4.2	31.6	0.75	0	131.88	27	2	0.489589	15.2327	96.886	0.923754	3.39941
8	7	10.21	125	878.6	885.6	882.1	6.4	4.2	31.6	0.75	0	131.88	27	2	0.489589	15.2327	96.886	0.923754	2.7805
9	7	10.21	125	878.6	885.6	882.1	6.4	4.2	31.6	0.75	0	131.88	27	2	0.489589	15.2327	96.886	0.923754	1.81979
10	7	10.21	125	878.6	885.6	882.1	6.4	4.2	31.6	0.75	0	131.88	27	2	0.489589	15.2327	96.886	0.923754	0.979179
1	7	10.68	150	891.7	895.9	893.8	4.2	2.7	32	1.2	24	130	24	1	3.66579	40.2541	91.6535	0.993438	3.00018
2	7	10.68	150	891.7	895.9	893.8	4.2	2.7	32	1.2	24	130	24	1	3.66579	40.2541	91.6535	0.993438	1.81799
3	7	10.68	150	891.7	895.9	893.8	4.2	2.7	32	1.2	24	130	24	1	3.66579	40.2541	91.6535	0.993438	1.6193
4	7	10.68	150	891.7	895.9	893.8	4.2	2.7	32	1.2	24	130	24	1	3.66579	40.2541	91.6535	0.993438	1.26167
5	7	10.68	150	891.7	895.9	893.8	4.2	2.7	32	1.2	24	130	24	1	3.66579	40.2541	91.6535	0.993438	1.43055
6	7	10.68	150	891.7	895.9	893.8	4.2	2.7	32	1.2	24	130	24	1	3.66579	40.2541	91.6535	0.993438	2.01668
7	7	10.68	150	891.7	895.9	893.8	4.2	2.7	32	1.2	24	130	24	1	3.66579	40.2541	91.6535	0.993438	1.14245
1	7	10.21	125	850.9	856.9	853.9	5.5	3.4	31.6	0.848	28	165.96	27	2	0.305754	9.72174	96.9508	0.623988	0.467991
2	7	10.21	125	850.9	856.9	853.9	5.5	3.4	31.6	0.848	28	165.96	27	2	0.305754	9.72174	96.9508	0.623988	0.711347
3	7	10.21	125	850.9	856.9	853.9	5.5	3.4	31.6	0.848	28	165.96	27	2	0.305754	9.72174	96.9508	0.623988	0.349433
4	7	10.21	125	850.9	856.9	853.9	5.5	3.4	31.6	0.848	28	165.96	27	2	0.305754	9.72174	96.9508	0.623988	0.449272
1	7	11	125	898.2	904.6	901.4	4.5	3	30.3	0.673	26	169.42	27	2	0.797143	8.31725	91.254	0.586135	5.40416
2	7	11	125	898.2	904.6	901.4	4.5	3	30.3	0.673	26	169.42	27	2	0.797143	8.31725	91.254	0.586135	3.75712
3	7	11	125	898.2	904.6	901.4	4.5	3	30.3	0.673	26	169.42	27	2	0.797143	8.31725	91.254	0.586135	2.88964
4	7	11	125	898.2	904.6	901.4	4.5	3	30.3	0.673	26	169.42	27	2	0.797143	8.31725	91.254	0.586135	2.30351
1	7	10.21	125	909	913.3	911.15	4.3	3.3	30.8	0.732	34	91.22	15	1	0.525862	4.92908	90.3599	0.701149	3.57586
2	7	10.21	125	909	913.3	911.15	4.3	3.3	30.8	0.732	34	91.22	15	1	0.525862	4.92908	90.3599	0.701149	3.56184
3	7	10.21	125	909	913.3	911.15	4.3	3.3	30.8	0.732	34	91.22	15	1	0.525862	4.92908	90.3599	0.701149	4.34011
4	7	10.21	125	909	913.3	911.15	4.3	3.3	30.8	0.732	34	91.22	15	1	0.525862	4.92908	90.3599	0.701149	4.83092
5	7	10.21	125	909	913.3	911.15	4.3	3.3	30.8	0.732	34	91.22	15	1	0.525862	4.92908	90.3599	0.701149	4.41724
6	7	10.21	125	909	913.3	911.15	4.3	3.3	30.8	0.732	34	91.22	15	1	0.525862	4.92908	90.3599	0.701149	4.45931
7	7	10.21	125	909	913.3	911.15	4.3	3.3	30.8	0.732	34	91.22	15	1	0.525862	4.92908	90.3599	0.701149	4.03161
8	7	10.21	125	909	913.3	911.15	4.3	3.3	30.8	0.732	34	91.22	15	1	0.525862	4.92908	90.3599	0.701149	3.39356
9	7	10.21	125	909	913.3	911.15	4.3	3.3	30.8	0.732	34	91.22	15	1	0.525862	4.92908	90.3599	0.701149	2.35586
1	7	10.21	125	994.7	1001.7	998.2	6.4	4.2	31.6	0.638	24	55.4	8.5	1	0.928985	12.1076	92.874	0.615222	0.233784
2	7	10.21	125	994.7	1001.7	998.2	6.4	4.2	31.6	0.638	24	55.4	8.5	1	0.928985	12.1076	92.874	0.615222	0.818245
3	7	10.21	125	994.7	1001.7	998.2	6.4	4.2	31.6	0.638	24	55.4	8.5	1	0.928985	12.1076	92.874	0.615222	1.36579
4	7	10.21	125	994.7	1001.7	998.2	6.4	4.2	31.6	0.638	24	55.4	8.5	1	0.928985	12.1076	92.874	0.615222	1.6488
5	7	10.21	125	994.7	1001.7	998.2	6.4	4.2	31.6	0.638	24	55.4	8.5	1	0.928985	12.1076	92.874	0.615222	2.12252
6	7	10.21	125	994.7	1001.7	998.2	6.4	4.2	31.6	0.638	24	55.4	8.5	1	0.928985	12.1076	92.874	0.615222	0.701353
7	7	10.21	125	994.7	1001.7	998.2	6.4	4.2	31.6	0.638	24	55.4	8.5	1	0.928985	12.1076	92.874	0.615222	0.898224
1	7	10.21	125	894.3	898.7	896.5	2.4	0.4	25.8	0.107	44	5.1	0	1	0.0388492	0.311452	88.9098	0.0658462	0.399028
2	7	10.21	125	894.3	898.7	896.5	2.4	0.4	25.8	0.107	44	5.1	0	1	0.0388492	0.311452	88.9098	0.0658462	0.358862
3	7	10.21	125	894.3	898.7	896.5	2.4	0.4	25.8	0.107	44	5.1	0	1	0.0388492	0.311452	88.9098	0.0658462	0.283138
4	7	10.21	125	894.3	898.7	896.5	2.4	0.4	25.8	0.107	44	5.1	0	1	0.0388492	0.311452	88.9098	0.0658462	0.286431
5	7	10.21	125	894.3	898.7	896.5	2.4	0.4	25.8	0.107	44	5.1	0	1	0.0388492	0.311452	88.9098	0.0658462	0.217951
6	7	10.21	125	894.3	898.7	896.5	2.4	0.4	25.8	0.107	44	5.1	0	1	0.0388492	0.311452	88.9098	0.0658462	0.198855
7	7	10.21	125	894.3	898.7	896.5	2.4	0.4	25.8	0.107	44	5.1	0	1	0.0388492	0.311452	88.9098	0.0658462	0.146178
8	7	10.21	125	894.3	898.7	896.5	2.4	0.4	25.8	0.107	44	5.1	0	1	0.0388492	0.311452	88.9098	0.0658462	0.209391
9	7	10.21	125	894.3	898.7	896.5	2.4	0.4	25.8	0.107	44	5.1	0	1	0.0388492	0.311452	88.9098	0.0658462	0.212025
10	7	10.21	125	894.3	898.7	896.5	2.4	0.4	25.8	0.107	44	5.1	0	1	0.0388492	0.311452	88.9098	0.0658462	0.133009
1	7	10.21	125	902.8	913.3	908.05	10	9.2	32.5	1.156	30	80	0	1	2.36042	10.5714	81.7472	0.631128	0.864645
2	7	10.21	125	902.8	913.3	908.05	10	9.2	32.5	1.156	30	80	0	1	2.36042	10.5714	81.7472	0.631128	0.612194
3	7	10.21	125	902.8	913.3	908.05	10	9.2	32.5	1.156	30	80	0	1	2.36042	10.5714	81.7472	0.631128	1.19914
4	7	10.21	125	902.8	913.3	908.05	10	9.2	32.5	1.156	30	80	0	1	2.36042	10.5714	81.7472	0.631128	1.84289
5	7	10.21	125	902.8	913.3	908.05	10	9.2	32.5	1.156	30	80	0	1	2.36042	10.5714	81.7472	0.631128	0.208272
1	7	9.14	175	1019.4	1027	1023.2	7.6	6.9	32.2	0.608	28	205.74	34	1	3.68418	27.39	88.1439	0.610975	1.91235
2	7	9.14	175	1019.4	1027	1023.2	7.6	6.9	32.2	0.608	28	205.74	34	1	3.68418	27.39	88.1439	0.610975	1.8146
3	7	9.14	175	1019.4	1027	1023.2	7.6	6.9	32.2	0.608	28	205.74	34	1	3.68418	27.39	88.1439	0.610975	1.28916
4	7	9.14	175	1019.4	1027	1023.2	7.6	6.9	32.2	0.608	28	205.74	34	1	3.68418	27.39	88.1439	0.610975	0.72706
5	7	9.14	175	1019.4	1027	1023.2	7.6	6.9	32.2	0.608	28	205.74	34	1	3.68418	27.39	88.1439	0.610975	1.1303
6	7	9.14	175	1019.4	1027	1023.2	7.6	6.9	32.2	0.608	28	205.74	34	1	3.68418	27.39	88.1439	0.610975	0.329927
1	7	9.14	175	1039.6	1047.4	1043.5	6.5	5.3	31.7	0.504	31	292.8	47	2	2.34582	17.44	88.1439	0.389025	1.21765
2	7	9.14	175	1039.6	1047.4	1043.5	6.5	5.3	31.7	0.504	31	292.8	47	2	2.34582	17.44	88.1439	0.389025	1.1554
3	7	9.14	175	1039.6	1047.4	1043.5	6.5	5.3	31.7	0.504	31	292.8	47	2	2.34582	17.44	88.1439	0.389025	0.820842
4	7	9.14	175	1039.6	1047.4	1043.5	6.5	5.3	31.7	0.504	31	292.8	47	2	2.34582	17.44	88.1439	0.389025	0.46294
5	7	9.14	175	1039.6	1047.4	1043.5	6.5	5.3	31.7	0.504	31	292.8	47	2	2.34582	17.44	88.1439	0.389025	0.719696
6	7	9.14	175	1039.6	1047.4	1043.5	6.5	5.3	31.7	0.504	31	292.8	47	2	2.34582	17.44	88.1439	0.389025	0.210073
1	7	9.18	175	1069.9	1080	1074.95	9.5	7.9	31.6	1.099	24	185.23	34	1	2.06	29.65	93.5036	1	3.03
2	7	9.18	175	1069.9	1080	1074.95	9.5	7.9	31.6	1.099	24	185.23	34	1	2.06	29.65	93.5036	1	1.85
3	7	9.18	175	1069.9	1080	1074.95	9.5	7.9	31.6	1.099	24	185.23	34	1	2.06	29.65	93.5036	1	0.9
4	7	9.18	175	1069.9	1080	1074.95	9.5	7.9	31.6	1.099	24	185.23	34	1	2.06	29.65	93.5036	1	0.23
1	7	10.21	125	921.8	928.2	925	6.1	4.8	31.9	1.021	25	111.67	17	2	2.00097	17.6164	89.8	0.490433	1.22608
2	7	10.21	125	921.8	928.2	925	6.1	4.8	31.9	1.021	25	111.67	17	2	2.00097	17.6164	89.8	0.490433	3.02597
3	7	10.21	125	921.8	928.2	925	6.1	4.8	31.9	1.021	25	111.67	17	2	2.00097	17.6164	89.8	0.490433	4.05098
4	7	10.21	125	921.8	928.2	925	6.1	4.8	31.9	1.021	25	111.67	17	2	2.00097	17.6164	89.8	0.490433	2.47178
5	7	10.21	125	921.8	928.2	925	6.1	4.8	31.9	1.021	25	111.67	17	2	2.00097	17.6164	89.8	0.490433	1.18685
6	7	10.21	125	921.8	928.2	925	6.1	4.8	31.9	1.021	25	111.67	17	2	2.00097	17.6164	89.8	0.490433	0.740554
7	7	10.21	125	921.8	928.2	925	6.1	4.8	31.9	1.021	25	111.67	17	2	2.00097	17.6164	89.8	0.490433	0.0931823
1	7	12.03	175	1005.3	1018.7	1012	12.9	10.4	32.4	1.009	27	260.04	47	2	2.73617	42.9912	94.0163	0.678951	0.55674
2	7	12.03	175	1005.3	1018.7	1012	12.9	10.4	32.4	1.009	27	260.04	47	2	2.73617	42.9912	94.0163	0.678951	1.57517
3	7	12.03	175	1005.3	1018.7	1012	12.9	10.4	32.4	1.009	27	260.04	47	2	2.73617	42.9912	94.0163	0.678951	2.9806
4	7	12.03	175	1005.3	1018.7	1012	12.9	10.4	32.4	1.009	27	260.04	47	2	2.73617	42.9912	94.0163	0.678951	2.79728
5	7	12.03	175	1005.3	1018.7	1012	12.9	10.4	32.4	1.009	27	260.04	47	2	2.73617	42.9912	94.0163	0.678951	1.83317
6	7	12.03	175	1005.3	1018.7	1012	12.9	10.4	32.4	1.009	27	260.04	47	2	2.73617	42.9912	94.0163	0.678951	1.22211
7	7	12.03	175	1005.3	1018.7	1012	12.9	10.4	32.4	1.009	27	260.04	47	2	2.73617	42.9912	94.0163	0.678951	1.62948
8	7	12.03	175	1005.3	1018.7	1012	12.9	10.4	32.4	1.009	27	260.04	47	2	2.73617	42.9912	94.0163	0.678951	1.57517
9	7	12.03	175	1005.3	1018.7	1012	12.9	10.4	32.4	1.009	27	260.04	47	2	2.73617	42.9912	94.0163	0.678951	1.37827
10	7	12.03	175	1005.3	1018.7	1012	12.9	10.4	32.4	1.009	27	260.04	47	2	2.73617	42.9912	94.0163	0.678951	1.57517
11	7	12.03	175	1005.3	1018.7	1012	12.9	10.4	32.4	1.009	27	260.04	47	2	2.73617	42.9912	94.0163	0.678951	0.807952
1	7	8.67	125	825.9	835.2	830.55	8.6	5.1	31.2	1.224	26	108.84	17	2	2.30816	6.85121	74.8	0.523393	1.19857
2	7	8.67	125	825.9	835.2	830.55	8.6	5.1	31.2	1.224	26	108.84	17	2	2.30816	6.85121	74.8	0.523393	0.314036
3	7	8.67	125	825.9	835.2	830.55	8.6	5.1	31.2	1.224	26	108.84	17	2	2.30816	6.85121	74.8	0.523393	0.287866
1	7	8.19	125	939.6	947	943.3	7.4	4.5	31.7	0.648	27	53.04	8.5	1	0.575392	6.55062	91.9255	0.44261	0.526705
2	7	8.19	125	939.6	947	943.3	7.4	4.5	31.7	0.648	27	53.04	8.5	1	0.575392	6.55062	91.9255	0.44261	0.814402
3	7	8.19	125	939.6	947	943.3	7.4	4.5	31.7	0.648	27	53.04	8.5	1	0.575392	6.55062	91.9255	0.44261	0.517853
4	7	8.19	125	939.6	947	943.3	7.4	4.5	31.7	0.648	27	53.04	8.5	1	0.575392	6.55062	91.9255	0.44261	0.796697
5	7	8.19	125	939.6	947	943.3	7.4	4.5	31.7	0.648	27	53.04	8.5	1	0.575392	6.55062	91.9255	0.44261	1.15521
6	7	8.19	125	939.6	947	943.3	7.4	4.5	31.7	0.648	27	53.04	8.5	1	0.575392	6.55062	91.9255	0.44261	1.38979
7	7	8.19	125	939.6	947	943.3	7.4	4.5	31.7	0.648	27	53.04	8.5	1	0.575392	6.55062	91.9255	0.44261	2.11567
8	7	8.19	125	939.6	947	943.3	7.4	4.5	31.7	0.648	27	53.04	8.5	1	0.575392	6.55062	91.9255	0.44261	2.16879
9	7	8.19	125	939.6	947	943.3	7.4	4.5	31.7	0.648	27	53.04	8.5	1	0.575392	6.55062	91.9255	0.44261	2.63795
10	7	8.19	125	939.6	947	943.3	7.4	4.5	31.7	0.648	27	53.04	8.5	1	0.575392	6.55062	91.9255	0.44261	2.77074
11	7	8.19	125	939.6	947	943.3	7.4	4.5	31.7	0.648	27	53.04	8.5	1	0.575392	6.55062	91.9255	0.44261	3.20892
12	7	8.19	125	939.6	947	943.3	7.4	4.5	31.7	0.648	27	53.04	8.5	1	0.575392	6.55062	91.9255	0.44261	2.84598
1	7	10.21	125	893.4	900.7	897.05	7.3	6.1	31.7	0.858	30	84.04	13.5	1	3.88429	33.4789	89.604	0.92483	8.81363
2	7	10.21	125	893.4	900.7	897.05	7.3	6.1	31.7	0.858	30	84.04	13.5	1	3.88429	33.4789	89.604	0.92483	9.93268
3	7	10.21	125	893.4	900.7	897.05	7.3	6.1	31.7	0.858	30	84.04	13.5	1	3.88429	33.4789	89.604	0.92483	13.3361
4	7	10.21	125	893.4	900.7	897.05	7.3	6.1	31.7	0.858	30	84.04	13.5	1	3.88429	33.4789	89.604	0.92483	11.9581
5	7	10.21	125	893.4	900.7	897.05	7.3	6.1	31.7	0.858	30	84.04	13.5	1	3.88429	33.4789	89.604	0.92483	7.81482
6	7	10.21	125	893.4	900.7	897.05	7.3	6.1	31.7	0.858	30	84.04	13.5	1	3.88429	33.4789	89.604	0.92483	9.36853
7	7	10.21	125	893.4	900.7	897.05	7.3	6.1	31.7	0.858	30	84.04	13.5	1	3.88429	33.4789	89.604	0.92483	7.85181
8	7	10.21	125	893.4	900.7	897.05	7.3	6.1	31.7	0.858	30	84.04	13.5	1	3.88429	33.4789	89.604	0.92483	8.36047
9	7	10.21	125	893.4	900.7	897.05	7.3	6.1	31.7	0.858	30	84.04	13.5	1	3.88429	33.4789	89.604	0.92483	7.69459
10	7	10.21	125	893.4	900.7	897.05	7.3	6.1	31.7	0.858	30	84.04	13.5	1	3.88429	33.4789	89.604	0.92483	6.90848
11	7	10.21	125	893.4	900.7	897.05	7.3	6.1	31.7	0.858	30	84.04	13.5	1	3.88429	33.4789	89.604	0.92483	6.77901
12	7	10.21	125	893.4	900.7	897.05	7.3	6.1	31.7	0.858	30	84.04	13.5	1	3.88429	33.4789	89.604	0.92483	5.9929
1	7	10.21	125	820.4	825.5	822.95	5.1	4.2	31.5	0.897	32	77.9	11.5	1	0.263786	5.80663	95.6546	0.333906	0.180309
2	7	10.21	125	820.4	825.5	822.95	5.1	4.2	31.5	0.897	32	77.9	11.5	1	0.263786	5.80663	95.6546	0.333906	0.270464
3	7	10.21	125	820.4	825.5	822.95	5.1	4.2	31.5	0.897	32	77.9	11.5	1	0.263786	5.80663	95.6546	0.333906	0.407366
4	7	10.21	125	820.4	825.5	822.95	5.1	4.2	31.5	0.897	32	77.9	11.5	1	0.263786	5.80663	95.6546	0.333906	0.217039
5	7	10.21	125	820.4	825.5	822.95	5.1	4.2	31.5	0.897	32	77.9	11.5	1	0.263786	5.80663	95.6546	0.333906	0.0734594
1	7	10.21	125	835.7	844.3	840	8.4	6.9	31.7	1.083	33	157.36	23	2	0.523224	11.5176	95.6546	0.662309	0.357647
2	7	10.21	125	835.7	844.3	840	8.4	6.9	31.7	1.083	33	157.36	23	2	0.523224	11.5176	95.6546	0.662309	0.53647
3	7	10.21	125	835.7	844.3	840	8.4	6.9	31.7	1.083	33	157.36	23	2	0.523224	11.5176	95.6546	0.662309	0.808017
4	7	10.21	125	835.7	844.3	840	8.4	6.9	31.7	1.083	33	157.36	23	2	0.523224	11.5176	95.6546	0.662309	0.430501
5	7	10.21	125	835.7	844.3	840	8.4	6.9	31.7	1.083	33	157.36	23	2	0.523224	11.5176	95.6546	0.662309	0.145708
1	7	11	125	888.6	898.9	893.75	8.8	6.6	31.5	0.753	23	190.48	29	2	0.394603	21.2535	98.1772	0.917682	0.587317
2	7	11	125	888.6	898.9	893.75	8.8	6.6	31.5	0.753	23	190.48	29	2	0.394603	21.2535	98.1772	0.917682	0.835091
3	7	11	125	888.6	898.9	893.75	8.8	6.6	31.5	0.753	23	190.48	29	2	0.394603	21.2535	98.1772	0.917682	0.642378
4	7	11	125	888.6	898.9	893.75	8.8	6.6	31.5	0.753	23	190.48	29	2	0.394603	21.2535	98.1772	0.917682	0.422134
5	7	11	125	888.6	898.9	893.75	8.8	6.6	31.5	0.753	23	190.48	29	2	0.394603	21.2535	98.1772	0.917682	0.60567
6	7	11	125	888.6	898.9	893.75	8.8	6.6	31.5	0.753	23	190.48	29	2	0.394603	21.2535	98.1772	0.917682	0.559786
7	7	11	125	888.6	898.9	893.75	8.8	6.6	31.5	0.753	23	190.48	29	2	0.394603	21.2535	98.1772	0.917682	0.624024
8	7	11	125	888.6	898.9	893.75	8.8	6.6	31.5	0.753	23	190.48	29	2	0.394603	21.2535	98.1772	0.917682	0.468018
1	7	11	125	957.4	967.9	962.65	9.4	8.2	31.4	1.226	33	123.6	21	2	3.39849	22.4301	86.8421	0.755221	5.15816
2	7	11	125	957.4	967.9	962.65	9.4	8.2	31.4	1.226	33	123.6	21	2	3.39849	22.4301	86.8421	0.755221	4.41049
3	7	11	125	957.4	967.9	962.65	9.4	8.2	31.4	1.226	33	123.6	21	2	3.39849	22.4301	86.8421	0.755221	3.90449
4	7	11	125	957.4	967.9	962.65	9.4	8.2	31.4	1.226	33	123.6	21	2	3.39849	22.4301	86.8421	0.755221	4.46336
5	7	11	125	957.4	967.9	962.65	9.4	8.2	31.4	1.226	33	123.6	21	2	3.39849	22.4301	86.8421	0.755221	5.36962
6	7	11	125	957.4	967.9	962.65	9.4	8.2	31.4	1.226	33	123.6	21	2	3.39849	22.4301	86.8421	0.755221	5.69437
7	7	11	125	957.4	967.9	962.65	9.4	8.2	31.4	1.226	33	123.6	21	2	3.39849	22.4301	86.8421	0.755221	3.97246
8	7	11	125	957.4	967.9	962.65	9.4	8.2	31.4	1.226	33	123.6	21	2	3.39849	22.4301	86.8421	0.755221	3.20214
9	7	11	125	957.4	967.9	962.65	9.4	8.2	31.4	1.226	33	123.6	21	2	3.39849	22.4301	86.8421	0.755221	2.34874
10	7	11	125	957.4	967.9	962.65	9.4	8.2	31.4	1.226	33	123.6	21	2	3.39849	22.4301	86.8421	0.755221	2.18259
1	7	10.21	125	964.8	968.3	966.55	3.2	2.6	31.1	0.559	26	65.78	10.5	1	1.32992	13.5853	91.0835	0.403006	3.70362
2	7	10.21	125	964.8	968.3	966.55	3.2	2.6	31.1	0.559	26	65.78	10.5	1	1.32992	13.5853	91.0835	0.403006	2.08757
3	7	10.21	125	964.8	968.3	966.55	3.2	2.6	31.1	0.559	26	65.78	10.5	1	1.32992	13.5853	91.0835	0.403006	2.1722
4	7	10.21	125	964.8	968.3	966.55	3.2	2.6	31.1	0.559	26	65.78	10.5	1	1.32992	13.5853	91.0835	0.403006	1.86189
5	7	10.21	125	964.8	968.3	966.55	3.2	2.6	31.1	0.559	26	65.78	10.5	1	1.32992	13.5853	91.0835	0.403006	1.83368
6	7	10.21	125	964.8	968.3	966.55	3.2	2.6	31.1	0.559	26	65.78	10.5	1	1.32992	13.5853	91.0835	0.403006	2.47849
7	7	10.21	125	964.8	968.3	966.55	3.2	2.6	31.1	0.559	26	65.78	10.5	1	1.32992	13.5853	91.0835	0.403006	1.94652
8	7	10.21	125	964.8	968.3	966.55	3.2	2.6	31.1	0.559	26	65.78	10.5	1	1.32992	13.5853	91.0835	0.403006	1.9304
9	7	10.21	125	964.8	968.3	966.55	3.2	2.6	31.1	0.559	26	65.78	10.5	1	1.32992	13.5853	91.0835	0.403006	2.28504
10	7	10.21	125	964.8	968.3	966.55	3.2	2.6	31.1	0.559	26	65.78	10.5	1	1.32992	13.5853	91.0835	0.403006	1.25738
11	7	10.21	125	964.8	968.3	966.55	3.2	2.6	31.1	0.559	26	65.78	10.5	1	1.32992	13.5853	91.0835	0.403006	1.90622
12	7	10.21	125	964.8	968.3	966.55	3.2	2.6	31.1	0.559	26	65.78	10.5	1	1.32992	13.5853	91.0835	0.403006	1.23723
1	7	10.21	125	829.4	834.3	831.85	4.9	3.6	31.6	0.63	28	87.81	13.5	1	1.20946	16.7747	93.2749	0.87642	13.5933
2	7	10.21	125	829.4	834.3	831.85	4.9	3.6	31.6	0.63	28	87.81	13.5	1	1.20946	16.7747	93.2749	0.87642	12.5065
3	7	10.21	125	829.4	834.3	831.85	4.9	3.6	31.6	0.63	28	87.81	13.5	1	1.20946	16.7747	93.2749	0.87642	13.8562
4	7	10.21	125	829.4	834.3	831.85	4.9	3.6	31.6	0.63	28	87.81	13.5	1	1.20946	16.7747	93.2749	0.87642	11.4548
5	7	10.21	125	829.4	834.3	831.85	4.9	3.6	31.6	0.63	28	87.81	13.5	1	1.20946	16.7747	93.2749	0.87642	11.0078
6	7	10.21	125	829.4	834.3	831.85	4.9	3.6	31.6	0.63	28	87.81	13.5	1	1.20946	16.7747	93.2749	0.87642	11.3321
7	7	10.21	125	829.4	834.3	831.85	4.9	3.6	31.6	0.63	28	87.81	13.5	1	1.20946	16.7747	93.2749	0.87642	9.56174
8	7	10.21	125	829.4	834.3	831.85	4.9	3.6	31.6	0.63	28	87.81	13.5	1	1.20946	16.7747	93.2749	0.87642	8.89566
9	7	10.21	125	829.4	834.3	831.85	4.9	3.6	31.6	0.63	28	87.81	13.5	1	1.20946	16.7747	93.2749	0.87642	7.07271
10	7	10.21	125	829.4	834.3	831.85	4.9	3.6	31.6	0.63	28	87.81	13.5	1	1.20946	16.7747	93.2749	0.87642	7.11653
11	7	10.21	125	829.4	834.3	831.85	4.9	3.6	31.6	0.63	28	87.81	13.5	1	1.20946	16.7747	93.2749	0.87642	9.02713
12	7	10.21	125	829.4	834.3	831.85	4.9	3.6	31.6	0.63	28	87.81	13.5	1	1.20946	16.7747	93.2749	0.87642	7.39699
1	7	10.21	125	850.6	852.4	851.5	1.8	1.7	26.4	0.123	23	88.18	13.5	1	0.111507	1.54655	93.2749	0.0808022	1.25324
2	7	10.21	125	850.6	852.4	851.5	1.8	1.7	26.4	0.123	23	88.18	13.5	1	0.111507	1.54655	93.2749	0.0808022	1.15305
3	7	10.21	125	850.6	852.4	851.5	1.8	1.7	26.4	0.123	23	88.18	13.5	1	0.111507	1.54655	93.2749	0.0808022	1.27748
4	7	10.21	125	850.6	852.4	851.5	1.8	1.7	26.4	0.123	23	88.18	13.5	1	0.111507	1.54655	93.2749	0.0808022	1.05609
5	7	10.21	125	850.6	852.4	851.5	1.8	1.7	26.4	0.123	23	88.18	13.5	1	0.111507	1.54655	93.2749	0.0808022	1.01488
6	7	10.21	125	850.6	852.4	851.5	1.8	1.7	26.4	0.123	23	88.18	13.5	1	0.111507	1.54655	93.2749	0.0808022	1.04477
7	7	10.21	125	850.6	852.4	851.5	1.8	1.7	26.4	0.123	23	88.18	13.5	1	0.111507	1.54655	93.2749	0.0808022	0.881552
8	7	10.21	125	850.6	852.4	851.5	1.8	1.7	26.4	0.123	23	88.18	13.5	1	0.111507	1.54655	93.2749	0.0808022	0.820143
9	7	10.21	125	850.6	852.4	851.5	1.8	1.7	26.4	0.123	23	88.18	13.5	1	0.111507	1.54655	93.2749	0.0808022	0.652074
10	7	10.21	125	850.6	852.4	851.5	1.8	1.7	26.4	0.123	23	88.18	13.5	1	0.111507	1.54655	93.2749	0.0808022	0.656114
11	7	10.21	125	850.6	852.4	851.5	1.8	1.7	26.4	0.123	23	88.18	13.5	1	0.111507	1.54655	93.2749	0.0808022	0.832263
12	7	10.21	125	850.6	852.4	851.5	1.8	1.7	26.4	0.123	23	88.18	13.5	1	0.111507	1.54655	93.2749	0.0808022	0.681971
1	7	11	125	915.6	921.4	918.5	5.8	3.6	31.7	0.629	26	87.31	13.5	1	0.716191	14.3187	95.2365	0.515245	1.36025
2	7	11	125	915.6	921.4	918.5	5.8	3.6	31.7	0.629	26	87.31	13.5	1	0.716191	14.3187	95.2365	0.515245	2.12796
3	7	11	125	915.6	921.4	918.5	5.8	3.6	31.7	0.629	26	87.31	13.5	1	0.716191	14.3187	95.2365	0.515245	1.40662
4	7	11	125	915.6	921.4	918.5	5.8	3.6	31.7	0.629	26	87.31	13.5	1	0.716191	14.3187	95.2365	0.515245	0.834697
5	7	11	125	915.6	921.4	918.5	5.8	3.6	31.7	0.629	26	87.31	13.5	1	0.716191	14.3187	95.2365	0.515245	1.10778
6	7	11	125	915.6	921.4	918.5	5.8	3.6	31.7	0.629	26	87.31	13.5	1	0.716191	14.3187	95.2365	0.515245	0.932594
1	7	8.38	125	894.4	899.6	897	5.2	4	31.2	0.701	29	91.56	15	1	0.809281	5.42475	87.0183	0.285965	1.99032
2	7	8.38	125	894.4	899.6	897	5.2	4	31.2	0.701	29	91.56	15	1	0.809281	5.42475	87.0183	0.285965	1.81588
3	7	8.38	125	894.4	899.6	897	5.2	4	31.2	0.701	29	91.56	15	1	0.809281	5.42475	87.0183	0.285965	1.55565
4	7	8.38	125	894.4	899.6	897	5.2	4	31.2	0.701	29	91.56	15	1	0.809281	5.42475	87.0183	0.285965	1.32688
5	7	8.38	125	894.4	899.6	897	5.2	4	31.2	0.701	29	91.56	15	1	0.809281	5.42475	87.0183	0.285965	1.25253
6	7	8.38	125	894.4	899.6	897	5.2	4	31.2	0.701	29	91.56	15	1	0.809281	5.42475	87.0183	0.285965	0.969421
7	7	8.38	125	894.4	899.6	897	5.2	4	31.2	0.701	29	91.56	15	1	0.809281	5.42475	87.0183	0.285965	0.806421
8	7	8.38	125	894.4	899.6	897	5.2	4	31.2	0.701	29	91.56	15	1	0.809281	5.42475	87.0183	0.285965	1.52991
9	7	8.38	125	894.4	899.6	897	5.2	4	31.2	0.701	29	91.56	15	1	0.809281	5.42475	87.0183	0.285965	0.689175
10	7	8.38	125	894.4	899.6	897	5.2	4	31.2	0.701	29	91.56	15	1	0.809281	5.42475	87.0183	0.285965	0.591947
11	7	8.38	125	894.4	899.6	897	5.2	4	31.2	0.701	29	91.56	15	1	0.809281	5.42475	87.0183	0.285965	0.769246
1	7	8.38	125	913.8	922.9	918.35	8.7	7.9	31.3	0.884	31	159.28	29	2	2.01558	13.5108	87.0183	0.71222	4.95705
2	7	8.38	125	913.8	922.9	918.35	8.7	7.9	31.3	0.884	31	159.28	29	2	2.01558	13.5108	87.0183	0.71222	4.5226
3	7	8.38	125	913.8	922.9	918.35	8.7	7.9	31.3	0.884	31	159.28	29	2	2.01558	13.5108	87.0183	0.71222	3.87448
4	7	8.38	125	913.8	922.9	918.35	8.7	7.9	31.3	0.884	31	159.28	29	2	2.01558	13.5108	87.0183	0.71222	3.3047
5	7	8.38	125	913.8	922.9	918.35	8.7	7.9	31.3	0.884	31	159.28	29	2	2.01558	13.5108	87.0183	0.71222	3.11952
6	7	8.38	125	913.8	922.9	918.35	8.7	7.9	31.3	0.884	31	159.28	29	2	2.01558	13.5108	87.0183	0.71222	2.41443
7	7	8.38	125	913.8	922.9	918.35	8.7	7.9	31.3	0.884	31	159.28	29	2	2.01558	13.5108	87.0183	0.71222	2.00846
8	7	8.38	125	913.8	922.9	918.35	8.7	7.9	31.3	0.884	31	159.28	29	2	2.01558	13.5108	87.0183	0.71222	3.81038
9	7	8.38	125	913.8	922.9	918.35	8.7	7.9	31.3	0.884	31	159.28	29	2	2.01558	13.5108	87.0183	0.71222	1.71645
10	7	8.38	125	913.8	922.9	918.35	8.7	7.9	31.3	0.884	31	159.28	29	2	2.01558	13.5108	87.0183	0.71222	1.47429
11	7	8.38	125	913.8	922.9	918.35	8.7	7.9	31.3	0.884	31	159.28	29	2	2.01558	13.5108	87.0183	0.71222	1.91587
1	7	10.21	125	927	934.4	930.7	7.4	3.9	0	0.6	27	98.14	15	1	0.868235	5.89235	87.1574	0.529412	1.37647
2	7	10.21	125	927	934.4	930.7	7.4	3.9	0	0.6	27	98.14	15	1	0.868235	5.89235	87.1574	0.529412	2.60471
3	7	10.21	125	927	934.4	930.7	7.4	3.9	0	0.6	27	98.14	15	1	0.868235	5.89235	87.1574	0.529412	2.85353
4	7	10.21	125	927	934.4	930.7	7.4	3.9	0	0.6	27	98.14	15	1	0.868235	5.89235	87.1574	0.529412	2.46706
5	7	10.21	125	927	934.4	930.7	7.4	3.9	0	0.6	27	98.14	15	1	0.868235	5.89235	87.1574	0.529412	2.16
6	7	10.21	125	927	934.4	930.7	7.4	3.9	0	0.6	27	98.14	15	1	0.868235	5.89235	87.1574	0.529412	2.61
7	7	10.21	125	927	934.4	930.7	7.4	3.9	0	0.6	27	98.14	15	1	0.868235	5.89235	87.1574	0.529412	2.77412
8	7	10.21	125	927	934.4	930.7	7.4	3.9	0	0.6	27	98.14	15	1	0.868235	5.89235	87.1574	0.529412	2.46176
1	7	9.04	125	929.9	940.4	935.15	10.5	9	32.5	1.06	22	77.56	11.5	1	4.06735	16.7665	80.4772	0.645611	5.42313
2	7	9.04	125	929.9	940.4	935.15	10.5	9	32.5	1.06	22	77.56	11.5	1	4.06735	16.7665	80.4772	0.645611	6.48839
3	7	9.04	125	929.9	940.4	935.15	10.5	9	32.5	1.06	22	77.56	11.5	1	4.06735	16.7665	80.4772	0.645611	10.0586
4	7	9.04	125	929.9	940.4	935.15	10.5	9	32.5	1.06	22	77.56	11.5	1	4.06735	16.7665	80.4772	0.645611	9.91658
5	7	9.04	125	929.9	940.4	935.15	10.5	9	32.5	1.06	22	77.56	11.5	1	4.06735	16.7665	80.4772	0.645611	9.47757
6	7	9.04	125	929.9	940.4	935.15	10.5	9	32.5	1.06	22	77.56	11.5	1	4.06735	16.7665	80.4772	0.645611	8.41877
7	7	9.04	125	929.9	940.4	935.15	10.5	9	32.5	1.06	22	77.56	11.5	1	4.06735	16.7665	80.4772	0.645611	7.18565
8	7	9.04	125	929.9	940.4	935.15	10.5	9	32.5	1.06	22	77.56	11.5	1	4.06735	16.7665	80.4772	0.645611	5.10678
9	7	9.04	125	929.9	940.4	935.15	10.5	9	32.5	1.06	22	77.56	11.5	1	4.06735	16.7665	80.4772	0.645611	4.25458
10	7	9.04	125	929.9	940.4	935.15	10.5	9	32.5	1.06	22	77.56	11.5	1	4.06735	16.7665	80.4772	0.645611	2.59536
11	7	9.04	125	929.9	940.4	935.15	10.5	9	32.5	1.06	22	77.56	11.5	1	4.06735	16.7665	80.4772	0.645611	1.41389
12	7	9.04	125	929.9	940.4	935.15	10.5	9	32.5	1.06	22	77.56	11.5	1	4.06735	16.7665	80.4772	0.645611	1.15564
1	7	8.12	125	960.4	974.4	967.4	13.3	9.2	30.9	0.356	30	216.84	33	2	1.41	24.51	94.5602	1	4.02
2	7	8.12	125	960.4	974.4	967.4	13.3	9.2	30.9	0.356	30	216.84	33	2	1.41	24.51	94.5602	1	3.56
3	7	8.12	125	960.4	974.4	967.4	13.3	9.2	30.9	0.356	30	216.84	33	2	1.41	24.51	94.5602	1	2.4
4	7	8.12	125	960.4	974.4	967.4	13.3	9.2	30.9	0.356	30	216.84	33	2	1.41	24.51	94.5602	1	1.99
5	7	8.12	125	960.4	974.4	967.4	13.3	9.2	30.9	0.356	30	216.84	33	2	1.41	24.51	94.5602	1	1.07
6	7	8.12	125	960.4	974.4	967.4	13.3	9.2	30.9	0.356	30	216.84	33	2	1.41	24.51	94.5602	1	0.71
1	7	10.15	125	979	997.9	988.45	18.1	11.6	32.3	0.967	27	80.55	14	1	0.326706	27.0077	98.8048	0.77787	0.723419
2	7	10.15	125	979	997.9	988.45	18.1	11.6	32.3	0.967	27	80.55	14	1	0.326706	27.0077	98.8048	0.77787	1.0579
3	7	10.15	125	979	997.9	988.45	18.1	11.6	32.3	0.967	27	80.55	14	1	0.326706	27.0077	98.8048	0.77787	1.33016
4	7	10.15	125	979	997.9	988.45	18.1	11.6	32.3	0.967	27	80.55	14	1	0.326706	27.0077	98.8048	0.77787	1.01901
5	7	10.15	125	979	997.9	988.45	18.1	11.6	32.3	0.967	27	80.55	14	1	0.326706	27.0077	98.8048	0.77787	1.50129
6	7	10.15	125	979	997.9	988.45	18.1	11.6	32.3	0.967	27	80.55	14	1	0.326706	27.0077	98.8048	0.77787	1.36905
7	7	10.15	125	979	997.9	988.45	18.1	11.6	32.3	0.967	27	80.55	14	1	0.326706	27.0077	98.8048	0.77787	0.886772
8	7	10.15	125	979	997.9	988.45	18.1	11.6	32.3	0.967	27	80.55	14	1	0.326706	27.0077	98.8048	0.77787	1.14347
9	7	10.15	125	979	997.9	988.45	18.1	11.6	32.3	0.967	27	80.55	14	1	0.326706	27.0077	98.8048	0.77787	1.22903
10	7	10.15	125	979	997.9	988.45	18.1	11.6	32.3	0.967	27	80.55	14	1	0.326706	27.0077	98.8048	0.77787	2.24027
11	7	10.15	125	979	997.9	988.45	18.1	11.6	32.3	0.967	27	80.55	14	1	0.326706	27.0077	98.8048	0.77787	2.14692
12	7	10.15	125	979	997.9	988.45	18.1	11.6	32.3	0.967	27	80.55	14	1	0.326706	27.0077	98.8048	0.77787	2.45029
1	7	10.23	175	1030	1042.2	1036.1	10.1	6	32.2	1.112	28	312.52	49	2	6.3715	55.6365	89.7247	0.912822	0.702873
2	7	10.23	175	1030	1042.2	1036.1	10.1	6	32.2	1.112	28	312.52	49	2	6.3715	55.6365	89.7247	0.912822	5.14832
1	7	9.54	150	1110.8	1116.9	1113.85	5.7	5.2	29.8	0.521	26	120	19	1	0.289784	23.6408	98.7891	0.934787	1.72001
2	7	9.54	150	1110.8	1116.9	1113.85	5.7	5.2	29.8	0.521	26	120	19	1	0.289784	23.6408	98.7891	0.934787	2.38371
3	7	9.54	150	1110.8	1116.9	1113.85	5.7	5.2	29.8	0.521	26	120	19	1	0.289784	23.6408	98.7891	0.934787	2.80436
4	7	9.54	150	1110.8	1116.9	1113.85	5.7	5.2	29.8	0.521	26	120	19	1	0.289784	23.6408	98.7891	0.934787	1.85088
5	7	9.54	150	1110.8	1116.9	1113.85	5.7	5.2	29.8	0.521	26	120	19	1	0.289784	23.6408	98.7891	0.934787	1.55175
6	7	9.54	150	1110.8	1116.9	1113.85	5.7	5.2	29.8	0.521	26	120	19	1	0.289784	23.6408	98.7891	0.934787	0.616959
7	7	9.54	150	1110.8	1116.9	1113.85	5.7	5.2	29.8	0.521	26	120	19	1	0.289784	23.6408	98.7891	0.934787	0.850656
1	7	9.54	150	1118.3	1122	1120.15	0.9	0.6	29.6	0.315	33	236.5	37	2	0.020216	1.64923	98.7891	0.0652129	0.119992
2	7	9.54	150	1118.3	1122	1120.15	0.9	0.6	29.6	0.315	33	236.5	37	2	0.020216	1.64923	98.7891	0.0652129	0.166293
3	7	9.54	150	1118.3	1122	1120.15	0.9	0.6	29.6	0.315	33	236.5	37	2	0.020216	1.64923	98.7891	0.0652129	0.195639
4	7	9.54	150	1118.3	1122	1120.15	0.9	0.6	29.6	0.315	33	236.5	37	2	0.020216	1.64923	98.7891	0.0652129	0.129122
5	7	9.54	150	1118.3	1122	1120.15	0.9	0.6	29.6	0.315	33	236.5	37	2	0.020216	1.64923	98.7891	0.0652129	0.108253
6	7	9.54	150	1118.3	1122	1120.15	0.9	0.6	29.6	0.315	33	236.5	37	2	0.020216	1.64923	98.7891	0.0652129	0.0430405
7	7	9.54	150	1118.3	1122	1120.15	0.9	0.6	29.6	0.315	33	236.5	37	2	0.020216	1.64923	98.7891	0.0652129	0.0593437
1	7	10.21	125	910.8	914.2	912.5	3.4	2.8	31.3	0.516	25	53.04	8.5	1	0	0	0	0.371729	0.234189
2	7	10.21	125	910.8	914.2	912.5	3.4	2.8	31.3	0.516	25	53.04	8.5	1	0	0	0	0.371729	0.148692
3	7	10.21	125	910.8	914.2	912.5	3.4	2.8	31.3	0.516	25	53.04	8.5	1	0	0	0	0.371729	0.267645
4	7	10.21	125	910.8	914.2	912.5	3.4	2.8	31.3	0.516	25	53.04	8.5	1	0	0	0	0.371729	0.304818
5	7	10.21	125	910.8	914.2	912.5	3.4	2.8	31.3	0.516	25	53.04	8.5	1	0	0	0	0.371729	0.750893
6	7	10.21	125	910.8	914.2	912.5	3.4	2.8	31.3	0.516	25	53.04	8.5	1	0	0	0	0.371729	0.676547
7	7	10.21	125	910.8	914.2	912.5	3.4	2.8	31.3	0.516	25	53.04	8.5	1	0	0	0	0.371729	1.08173
1	7	8.38	125	906.5	912.1	909.3	5.2	3.8	31.7	0.903	23	61.02	9	1	1.41099	28.8534	95.3378	0.959859	3.16753
2	7	8.38	125	906.5	912.1	909.3	5.2	3.8	31.7	0.903	23	61.02	9	1	1.41099	28.8534	95.3378	0.959859	2.11169
3	7	8.38	125	906.5	912.1	909.3	5.2	3.8	31.7	0.903	23	61.02	9	1	1.41099	28.8534	95.3378	0.959859	3.61867
4	7	8.38	125	906.5	912.1	909.3	5.2	3.8	31.7	0.903	23	61.02	9	1	1.41099	28.8534	95.3378	0.959859	2.57242
5	7	8.38	125	906.5	912.1	909.3	5.2	3.8	31.7	0.903	23	61.02	9	1	1.41099	28.8534	95.3378	0.959859	0.6815
6	7	8.38	125	906.5	912.1	909.3	5.2	3.8	31.7	0.903	23	61.02	9	1	1.41099	28.8534	95.3378	0.959859	1.29581
7	7	8.38	125	906.5	912.1	909.3	5.2	3.8	31.7	0.903	23	61.02	9	1	1.41099	28.8534	95.3378	0.959859	1.11344
8	7	8.38	125	906.5	912.1	909.3	5.2	3.8	31.7	0.903	23	61.02	9	1	1.41099	28.8534	95.3378	0.959859	0.172775
9	7	8.38	125	906.5	912.1	909.3	5.2	3.8	31.7	0.903	23	61.02	9	1	1.41099	28.8534	95.3378	0.959859	0.239965
1	7	9.73	150	1115.7	1121.8	1118.75	5.5	5	30.2	0.661	32	74.4	12	1	0.440316	24.5868	98.2406	0.50611	0.961609
2	7	9.73	150	1115.7	1121.8	1118.75	5.5	5	30.2	0.661	32	74.4	12	1	0.440316	24.5868	98.2406	0.50611	0.936304
3	7	9.73	150	1115.7	1121.8	1118.75	5.5	5	30.2	0.661	32	74.4	12	1	0.440316	24.5868	98.2406	0.50611	0.566843
4	7	9.73	150	1115.7	1121.8	1118.75	5.5	5	30.2	0.661	32	74.4	12	1	0.440316	24.5868	98.2406	0.50611	1.04259
5	7	9.73	150	1115.7	1121.8	1118.75	5.5	5	30.2	0.661	32	74.4	12	1	0.440316	24.5868	98.2406	0.50611	0.556721
6	7	9.73	150	1115.7	1121.8	1118.75	5.5	5	30.2	0.661	32	74.4	12	1	0.440316	24.5868	98.2406	0.50611	0.126528
7	7	9.73	150	1115.7	1121.8	1118.75	5.5	5	30.2	0.661	32	74.4	12	1	0.440316	24.5868	98.2406	0.50611	0.617454
8	7	9.73	150	1115.7	1121.8	1118.75	5.5	5	30.2	0.661	32	74.4	12	1	0.440316	24.5868	98.2406	0.50611	0.607332
9	7	9.73	150	1115.7	1121.8	1118.75	5.5	5	30.2	0.661	32	74.4	12	1	0.440316	24.5868	98.2406	0.50611	0.485866
10	7	9.73	150	1115.7	1121.8	1118.75	5.5	5	30.2	0.661	32	74.4	12	1	0.440316	24.5868	98.2406	0.50611	0.501049
11	7	9.73	150	1115.7	1121.8	1118.75	5.5	5	30.2	0.661	32	74.4	12	1	0.440316	24.5868	98.2406	0.50611	0.313788
12	7	9.73	150	1115.7	1121.8	1118.75	5.5	5	30.2	0.661	32	74.4	12	1	0.440316	24.5868	98.2406	0.50611	0.339094
1	7	9.64	125	956.2	961.6	958.9	5.4	3.8	31.7	0.767	29	86.32	14	1	1.35124	22.8815	94.4239	0.813998	0.1628
2	7	9.64	125	956.2	961.6	958.9	5.4	3.8	31.7	0.767	29	86.32	14	1	1.35124	22.8815	94.4239	0.813998	0.740738
3	7	9.64	125	956.2	961.6	958.9	5.4	3.8	31.7	0.767	29	86.32	14	1	1.35124	22.8815	94.4239	0.813998	0.447699
4	7	9.64	125	956.2	961.6	958.9	5.4	3.8	31.7	0.767	29	86.32	14	1	1.35124	22.8815	94.4239	0.813998	1.41636
5	7	9.64	125	956.2	961.6	958.9	5.4	3.8	31.7	0.767	29	86.32	14	1	1.35124	22.8815	94.4239	0.813998	1.94545
6	7	9.64	125	956.2	961.6	958.9	5.4	3.8	31.7	0.767	29	86.32	14	1	1.35124	22.8815	94.4239	0.813998	1.07448
7	7	9.64	125	956.2	961.6	958.9	5.4	3.8	31.7	0.767	29	86.32	14	1	1.35124	22.8815	94.4239	0.813998	0.537238
8	7	9.64	125	956.2	961.6	958.9	5.4	3.8	31.7	0.767	29	86.32	14	1	1.35124	22.8815	94.4239	0.813998	0.284899
1	7	9.71	125	922.3	933.2	927.75	8.2	4.6	31.6	0.716	31	106.32	17	2	2.85468	22.205	88.6085	0.878364	8.60796
2	7	9.71	125	922.3	933.2	927.75	8.2	4.6	31.6	0.716	31	106.32	17	2	2.85468	22.205	88.6085	0.878364	5.34045
3	7	9.71	125	922.3	933.2	927.75	8.2	4.6	31.6	0.716	31	106.32	17	2	2.85468	22.205	88.6085	0.878364	3.19724
4	7	9.71	125	922.3	933.2	927.75	8.2	4.6	31.6	0.716	31	106.32	17	2	2.85468	22.205	88.6085	0.878364	2.10807
5	7	9.71	125	922.3	933.2	927.75	8.2	4.6	31.6	0.716	31	106.32	17	2	2.85468	22.205	88.6085	0.878364	1.57227
6	7	9.71	125	922.3	933.2	927.75	8.2	4.6	31.6	0.716	31	106.32	17	2	2.85468	22.205	88.6085	0.878364	2.9513
7	7	9.71	125	922.3	933.2	927.75	8.2	4.6	31.6	0.716	31	106.32	17	2	2.85468	22.205	88.6085	0.878364	2.58239
8	7	9.71	125	922.3	933.2	927.75	8.2	4.6	31.6	0.716	31	106.32	17	2	2.85468	22.205	88.6085	0.878364	1.51957
9	7	9.71	125	922.3	933.2	927.75	8.2	4.6	31.6	0.716	31	106.32	17	2	2.85468	22.205	88.6085	0.878364	1.21214
1	7	8.59	125	971.2	983.5	977.35	10.8	8.2	32.1	0.613	32	178.42	29	2	1.32715	22.8705	94.5154	0.702196	4.48703
2	7	8.59	125	971.2	983.5	977.35	10.8	8.2	32.1	0.613	32	178.42	29	2	1.32715	22.8705	94.5154	0.702196	3.44076
3	7	8.59	125	971.2	983.5	977.35	10.8	8.2	32.1	0.613	32	178.42	29	2	1.32715	22.8705	94.5154	0.702196	1.86784
4	7	8.59	125	971.2	983.5	977.35	10.8	8.2	32.1	0.613	32	178.42	29	2	1.32715	22.8705	94.5154	0.702196	1.13756
5	7	8.59	125	971.2	983.5	977.35	10.8	8.2	32.1	0.613	32	178.42	29	2	1.32715	22.8705	94.5154	0.702196	0.0631976
1	7	13.7	150	952.4	958.6	955.5	3.1	2.5	29.5	0.434	28	255.78	43	2	0	0	0	0.664706	1.48894
2	7	13.7	150	952.4	958.6	955.5	3.1	2.5	29.5	0.434	28	255.78	43	2	0	0	0	0.664706	1.19647
3	7	13.7	150	952.4	958.6	955.5	3.1	2.5	29.5	0.434	28	255.78	43	2	0	0	0	0.664706	1.44906
4	7	13.7	150	952.4	958.6	955.5	3.1	2.5	29.5	0.434	28	255.78	43	2	0	0	0	0.664706	1.88112
5	7	13.7	150	952.4	958.6	955.5	3.1	2.5	29.5	0.434	28	255.78	43	2	0	0	0	0.664706	1.24965
6	7	13.7	150	952.4	958.6	955.5	3.1	2.5	29.5	0.434	28	255.78	43	2	0	0	0	0.664706	1.34271
7	7	13.7	150	952.4	958.6	955.5	3.1	2.5	29.5	0.434	28	255.78	43	2	0	0	0	0.664706	1.34271
8	7	13.7	150	952.4	958.6	955.5	3.1	2.5	29.5	0.434	28	255.78	43	2	0	0	0	0.664706	1.66177
1	7	10.21	125	1001.5	1009	1005.25	6.5	5	31.7	0.703	35	110.46	17	2	0.302626	7.45065	96.0968	0.605252	1.5555
2	7	10.21	125	1001.5	1009	1005.25	6.5	5	31.7	0.703	35	110.46	17	2	0.302626	7.45065	96.0968	0.605252	1.48892
3	7	10.21	125	1001.5	1009	1005.25	6.5	5	31.7	0.703	35	110.46	17	2	0.302626	7.45065	96.0968	0.605252	1.54944
4	7	10.21	125	1001.5	1009	1005.25	6.5	5	31.7	0.703	35	110.46	17	2	0.302626	7.45065	96.0968	0.605252	1.14998
5	7	10.21	125	1001.5	1009	1005.25	6.5	5	31.7	0.703	35	110.46	17	2	0.302626	7.45065	96.0968	0.605252	1.37997
6	7	10.21	125	1001.5	1009	1005.25	6.5	5	31.7	0.703	35	110.46	17	2	0.302626	7.45065	96.0968	0.605252	1.59181
7	7	10.21	125	1001.5	1009	1005.25	6.5	5	31.7	0.703	35	110.46	17	2	0.302626	7.45065	96.0968	0.605252	1.71892
8	7	10.21	125	1001.5	1009	1005.25	6.5	5	31.7	0.703	35	110.46	17	2	0.302626	7.45065	96.0968	0.605252	2.34838
9	7	10.21	125	1001.5	1009	1005.25	6.5	5	31.7	0.703	35	110.46	17	2	0.302626	7.45065	96.0968	0.605252	3.87966
10	7	10.21	125	1001.5	1009	1005.25	6.5	5	31.7	0.703	35	110.46	17	2	0.302626	7.45065	96.0968	0.605252	3.58309
11	7	10.21	125	1001.5	1009	1005.25	6.5	5	31.7	0.703	35	110.46	17	2	0.302626	7.45065	96.0968	0.605252	3.28046
12	7	10.21	125	1001.5	1009	1005.25	6.5	5	31.7	0.703	35	110.46	17	2	0.302626	7.45065	96.0968	0.605252	3.47415
1	7	10.21	125	929.2	937.4	933.3	8.2	6.2	31.6	0.659	35	63.98	9	1	0.765104	11.7605	93.8917	0.481198	0.818036
2	7	10.21	125	929.2	937.4	933.3	8.2	6.2	31.6	0.659	35	63.98	9	1	0.765104	11.7605	93.8917	0.481198	0.356086
3	7	10.21	125	929.2	937.4	933.3	8.2	6.2	31.6	0.659	35	63.98	9	1	0.765104	11.7605	93.8917	0.481198	0.673677
4	7	10.21	125	929.2	937.4	933.3	8.2	6.2	31.6	0.659	35	63.98	9	1	0.765104	11.7605	93.8917	0.481198	1.14044
5	7	10.21	125	929.2	937.4	933.3	8.2	6.2	31.6	0.659	35	63.98	9	1	0.765104	11.7605	93.8917	0.481198	0.962395
6	7	10.21	125	929.2	937.4	933.3	8.2	6.2	31.6	0.659	35	63.98	9	1	0.765104	11.7605	93.8917	0.481198	1.11638
7	7	10.21	125	929.2	937.4	933.3	8.2	6.2	31.6	0.659	35	63.98	9	1	0.765104	11.7605	93.8917	0.481198	1.62645
8	7	10.21	125	929.2	937.4	933.3	8.2	6.2	31.6	0.659	35	63.98	9	1	0.765104	11.7605	93.8917	0.481198	1.84299
9	7	10.21	125	929.2	937.4	933.3	8.2	6.2	31.6	0.659	35	63.98	9	1	0.765104	11.7605	93.8917	0.481198	1.87186
10	7	10.21	125	929.2	937.4	933.3	8.2	6.2	31.6	0.659	35	63.98	9	1	0.765104	11.7605	93.8917	0.481198	1.61201
11	7	10.21	125	929.2	937.4	933.3	8.2	6.2	31.6	0.659	35	63.98	9	1	0.765104	11.7605	93.8917	0.481198	1.85742
12	7	10.21	125	929.2	937.4	933.3	8.2	6.2	31.6	0.659	35	63.98	9	1	0.765104	11.7605	93.8917	0.481198	1.33773
1	7	9.73	150	1150.3	1155	1152.65	3.2	1.7	28	0.257	27.2	295.2	49	2	0.07619	11.4153	99.337	0.331261	2.70971
2	7	9.73	150	1150.3	1155	1152.65	3.2	1.7	28	0.257	27.2	295.2	49	2	0.07619	11.4153	99.337	0.331261	2.32545
3	7	9.73	150	1150.3	1155	1152.65	3.2	1.7	28	0.257	27.2	295.2	49	2	0.07619	11.4153	99.337	0.331261	1.59336
4	7	9.73	150	1150.3	1155	1152.65	3.2	1.7	28	0.257	27.2	295.2	49	2	0.07619	11.4153	99.337	0.331261	0.708898
5	7	9.73	150	1150.3	1155	1152.65	3.2	1.7	28	0.257	27.2	295.2	49	2	0.07619	11.4153	99.337	0.331261	0.523392
6	7	9.73	150	1150.3	1155	1152.65	3.2	1.7	28	0.257	27.2	295.2	49	2	0.07619	11.4153	99.337	0.331261	0.804964
7	7	9.73	150	1150.3	1155	1152.65	3.2	1.7	28	0.257	27.2	295.2	49	2	0.07619	11.4153	99.337	0.331261	0.639334
8	7	9.73	150	1150.3	1155	1152.65	3.2	1.7	28	0.257	27.2	295.2	49	2	0.07619	11.4153	99.337	0.331261	0.781776
9	7	9.73	150	1150.3	1155	1152.65	3.2	1.7	28	0.257	27.2	295.2	49	2	0.07619	11.4153	99.337	0.331261	1.06335
10	7	9.73	150	1150.3	1155	1152.65	3.2	1.7	28	0.257	27.2	295.2	49	2	0.07619	11.4153	99.337	0.331261	0.592957
11	7	9.73	150	1150.3	1155	1152.65	3.2	1.7	28	0.257	27.2	295.2	49	2	0.07619	11.4153	99.337	0.331261	0.722149
12	7	9.73	150	1150.3	1155	1152.65	3.2	1.7	28	0.257	27.2	295.2	49	2	0.07619	11.4153	99.337	0.331261	0.874529
1	7	9.73	150	1164.1	1168.7	1166.4	3.2	2	27	0.441	29.2	295.2	49	2	0.15381	23.0447	99.337	0.668739	5.47029
2	7	9.73	150	1164.1	1168.7	1166.4	3.2	2	27	0.441	29.2	295.2	49	2	0.15381	23.0447	99.337	0.668739	4.69455
3	7	9.73	150	1164.1	1168.7	1166.4	3.2	2	27	0.441	29.2	295.2	49	2	0.15381	23.0447	99.337	0.668739	3.21664
4	7	9.73	150	1164.1	1168.7	1166.4	3.2	2	27	0.441	29.2	295.2	49	2	0.15381	23.0447	99.337	0.668739	1.4311
5	7	9.73	150	1164.1	1168.7	1166.4	3.2	2	27	0.441	29.2	295.2	49	2	0.15381	23.0447	99.337	0.668739	1.05661
6	7	9.73	150	1164.1	1168.7	1166.4	3.2	2	27	0.441	29.2	295.2	49	2	0.15381	23.0447	99.337	0.668739	1.62504
7	7	9.73	150	1164.1	1168.7	1166.4	3.2	2	27	0.441	29.2	295.2	49	2	0.15381	23.0447	99.337	0.668739	1.29067
8	7	9.73	150	1164.1	1168.7	1166.4	3.2	2	27	0.441	29.2	295.2	49	2	0.15381	23.0447	99.337	0.668739	1.57822
9	7	9.73	150	1164.1	1168.7	1166.4	3.2	2	27	0.441	29.2	295.2	49	2	0.15381	23.0447	99.337	0.668739	2.14665
10	7	9.73	150	1164.1	1168.7	1166.4	3.2	2	27	0.441	29.2	295.2	49	2	0.15381	23.0447	99.337	0.668739	1.19704
11	7	9.73	150	1164.1	1168.7	1166.4	3.2	2	27	0.441	29.2	295.2	49	2	0.15381	23.0447	99.337	0.668739	1.45785
12	7	9.73	150	1164.1	1168.7	1166.4	3.2	2	27	0.441	29.2	295.2	49	2	0.15381	23.0447	99.337	0.668739	1.76547
1	7	9.82	125	957.1	966.9	962	9	7.9	31.7	0.715	29	85.72	14	1	1.00959	13.3953	92.9914	0.731586	0.373109
2	7	9.82	125	957.1	966.9	962	9	7.9	31.7	0.715	29	85.72	14	1	1.00959	13.3953	92.9914	0.731586	1.63875
3	7	9.82	125	957.1	966.9	962	9	7.9	31.7	0.715	29	85.72	14	1	1.00959	13.3953	92.9914	0.731586	1.16322
4	7	9.82	125	957.1	966.9	962	9	7.9	31.7	0.715	29	85.72	14	1	1.00959	13.3953	92.9914	0.731586	0.695006
5	7	9.82	125	957.1	966.9	962	9	7.9	31.7	0.715	29	85.72	14	1	1.00959	13.3953	92.9914	0.731586	1.28027
6	7	9.82	125	957.1	966.9	962	9	7.9	31.7	0.715	29	85.72	14	1	1.00959	13.3953	92.9914	0.731586	0.93643
7	7	9.82	125	957.1	966.9	962	9	7.9	31.7	0.715	29	85.72	14	1	1.00959	13.3953	92.9914	0.731586	1.9387
8	7	9.82	125	957.1	966.9	962	9	7.9	31.7	0.715	29	85.72	14	1	1.00959	13.3953	92.9914	0.731586	1.18517
9	7	9.82	125	957.1	966.9	962	9	7.9	31.7	0.715	29	85.72	14	1	1.00959	13.3953	92.9914	0.731586	2.30449
10	7	9.82	125	957.1	966.9	962	9	7.9	31.7	0.715	29	85.72	14	1	1.00959	13.3953	92.9914	0.731586	1.21443
1	7	10.21	125	983.9	992.2	988.05	7.5	4	31.6	0.706	24	135	23	2	1.02657	11.6896	91.9271	0.473071	2.99454
2	7	10.21	125	983.9	992.2	988.05	7.5	4	31.6	0.706	24	135	23	2	1.02657	11.6896	91.9271	0.473071	2.29913
3	7	10.21	125	983.9	992.2	988.05	7.5	4	31.6	0.706	24	135	23	2	1.02657	11.6896	91.9271	0.473071	1.75036
4	7	10.21	125	983.9	992.2	988.05	7.5	4	31.6	0.706	24	135	23	2	1.02657	11.6896	91.9271	0.473071	1.9254
5	7	10.21	125	983.9	992.2	988.05	7.5	4	31.6	0.706	24	135	23	2	1.02657	11.6896	91.9271	0.473071	0.837336
6	7	10.21	125	983.9	992.2	988.05	7.5	4	31.6	0.706	24	135	23	2	1.02657	11.6896	91.9271	0.473071	0.884644
7	7	10.21	125	983.9	992.2	988.05	7.5	4	31.6	0.706	24	135	23	2	1.02657	11.6896	91.9271	0.473071	0.988719
1	7	10.21	125	958.4	963.3	960.85	4.4	1.5	34	0.342	30.1	135	23	2	1.67433	17.0198	91.0435	0.512027	2.59086
2	7	10.21	125	958.4	963.3	960.85	4.4	1.5	34	0.342	30.1	135	23	2	1.67433	17.0198	91.0435	0.512027	1.54632
3	7	10.21	125	958.4	963.3	960.85	4.4	1.5	34	0.342	30.1	135	23	2	1.67433	17.0198	91.0435	0.512027	5.83199
4	7	10.21	125	958.4	963.3	960.85	4.4	1.5	34	0.342	30.1	135	23	2	1.67433	17.0198	91.0435	0.512027	5.83199
5	7	10.21	125	958.4	963.3	960.85	4.4	1.5	34	0.342	30.1	135	23	2	1.67433	17.0198	91.0435	0.512027	4.72089
6	7	10.21	125	958.4	963.3	960.85	4.4	1.5	34	0.342	30.1	135	23	2	1.67433	17.0198	91.0435	0.512027	2.46797
7	7	10.21	125	958.4	963.3	960.85	4.4	1.5	34	0.342	30.1	135	23	2	1.67433	17.0198	91.0435	0.512027	1.70505
8	7	10.21	125	958.4	963.3	960.85	4.4	1.5	34	0.342	30.1	135	23	2	1.67433	17.0198	91.0435	0.512027	1.7921
9	7	10.21	125	958.4	963.3	960.85	4.4	1.5	34	0.342	30.1	135	23	2	1.67433	17.0198	91.0435	0.512027	0.122887
1	7	10.21	125	945.7	951.3	948.5	5.2	3.3	32.5	0.53	28	157.71	23	2	2.28892	17.3311	88.3337	0.475867	1.91298
2	7	10.21	125	945.7	951.3	948.5	5.2	3.3	32.5	0.53	28	157.71	23	2	2.28892	17.3311	88.3337	0.475867	2.56968
3	7	10.21	125	945.7	951.3	948.5	5.2	3.3	32.5	0.53	28	157.71	23	2	2.28892	17.3311	88.3337	0.475867	1.63222
4	7	10.21	125	945.7	951.3	948.5	5.2	3.3	32.5	0.53	28	157.71	23	2	2.28892	17.3311	88.3337	0.475867	0.832767
1	7	10.21	125	929.2	936.6	932.9	6.8	4.7	30	0.583	32	58.9	9	1	2.75445	25.4895	90.2476	0.72106	2.48045
2	7	10.21	125	929.2	936.6	932.9	6.8	4.7	30	0.583	32	58.9	9	1	2.75445	25.4895	90.2476	0.72106	0.0648954
3	7	10.21	125	929.2	936.6	932.9	6.8	4.7	30	0.583	32	58.9	9	1	2.75445	25.4895	90.2476	0.72106	0.894114
4	7	10.21	125	929.2	936.6	932.9	6.8	4.7	30	0.583	32	58.9	9	1	2.75445	25.4895	90.2476	0.72106	0.317266
1	7	8.59	125	968.6	968.9	968.75	0.3	0.3	30	0.073	26.6	55.16	7	1	0.006505	0.234073	97.2961	0.00533197	0.00874443
2	7	8.59	125	968.6	968.9	968.75	0.3	0.3	30	0.073	26.6	55.16	7	1	0.006505	0.234073	97.2961	0.00533197	0.00559857
3	7	8.59	125	968.6	968.9	968.75	0.3	0.3	30	0.073	26.6	55.16	7	1	0.006505	0.234073	97.2961	0.00533197	0.00645168
4	7	8.59	125	968.6	968.9	968.75	0.3	0.3	30	0.073	26.6	55.16	7	1	0.006505	0.234073	97.2961	0.00533197	0.00399898
5	7	8.59	125	968.6	968.9	968.75	0.3	0.3	30	0.073	26.6	55.16	7	1	0.006505	0.234073	97.2961	0.00533197	0.00543861
6	7	8.59	125	968.6	968.9	968.75	0.3	0.3	30	0.073	26.6	55.16	7	1	0.006505	0.234073	97.2961	0.00533197	0.00346578
7	7	8.59	125	968.6	968.9	968.75	0.3	0.3	30	0.073	26.6	55.16	7	1	0.006505	0.234073	97.2961	0.00533197	0.00586517
8	7	8.59	125	968.6	968.9	968.75	0.3	0.3	30	0.073	26.6	55.16	7	1	0.006505	0.234073	97.2961	0.00533197	0.007838
9	7	8.59	125	968.6	968.9	968.75	0.3	0.3	30	0.073	26.6	55.16	7	1	0.006505	0.234073	97.2961	0.00533197	0.00762472
10	7	8.59	125	968.6	968.9	968.75	0.3	0.3	30	0.073	26.6	55.16	7	1	0.006505	0.234073	97.2961	0.00533197	0.00437222
11	7	8.59	125	968.6	968.9	968.75	0.3	0.3	30	0.073	26.6	55.16	7	1	0.006505	0.234073	97.2961	0.00533197	0.00250603
1	7	8.59	125	969.7	974.1	971.9	4.4	3.9	34	0.578	31.7	65.24	9	1	0.66957	24.0935	97.2961	0.548828	0.900077
2	7	8.59	125	969.7	974.1	971.9	4.4	3.9	34	0.578	31.7	65.24	9	1	0.66957	24.0935	97.2961	0.548828	0.576269
3	7	8.59	125	969.7	974.1	971.9	4.4	3.9	34	0.578	31.7	65.24	9	1	0.66957	24.0935	97.2961	0.548828	0.664082
4	7	8.59	125	969.7	974.1	971.9	4.4	3.9	34	0.578	31.7	65.24	9	1	0.66957	24.0935	97.2961	0.548828	0.411621
5	7	8.59	125	969.7	974.1	971.9	4.4	3.9	34	0.578	31.7	65.24	9	1	0.66957	24.0935	97.2961	0.548828	0.559804
6	7	8.59	125	969.7	974.1	971.9	4.4	3.9	34	0.578	31.7	65.24	9	1	0.66957	24.0935	97.2961	0.548828	0.356738
7	7	8.59	125	969.7	974.1	971.9	4.4	3.9	34	0.578	31.7	65.24	9	1	0.66957	24.0935	97.2961	0.548828	0.60371
8	7	8.59	125	969.7	974.1	971.9	4.4	3.9	34	0.578	31.7	65.24	9	1	0.66957	24.0935	97.2961	0.548828	0.806777
9	7	8.59	125	969.7	974.1	971.9	4.4	3.9	34	0.578	31.7	65.24	9	1	0.66957	24.0935	97.2961	0.548828	0.784824
10	7	8.59	125	969.7	974.1	971.9	4.4	3.9	34	0.578	31.7	65.24	9	1	0.66957	24.0935	97.2961	0.548828	0.450039
11	7	8.59	125	969.7	974.1	971.9	4.4	3.9	34	0.578	31.7	65.24	9	1	0.66957	24.0935	97.2961	0.548828	0.257949
1	7	8.59	125	974.7	978.9	976.8	2.7	1.7	30	0.328	29.4	125.36	17	2	0.165625	5.95979	97.2961	0.135758	0.222644
2	7	8.59	125	974.7	978.9	976.8	2.7	1.7	30	0.328	29.4	125.36	17	2	0.165625	5.95979	97.2961	0.135758	0.142546
3	7	8.59	125	974.7	978.9	976.8	2.7	1.7	30	0.328	29.4	125.36	17	2	0.165625	5.95979	97.2961	0.135758	0.164268
4	7	8.59	125	974.7	978.9	976.8	2.7	1.7	30	0.328	29.4	125.36	17	2	0.165625	5.95979	97.2961	0.135758	0.101819
5	7	8.59	125	974.7	978.9	976.8	2.7	1.7	30	0.328	29.4	125.36	17	2	0.165625	5.95979	97.2961	0.135758	0.138473
6	7	8.59	125	974.7	978.9	976.8	2.7	1.7	30	0.328	29.4	125.36	17	2	0.165625	5.95979	97.2961	0.135758	0.0882429
7	7	8.59	125	974.7	978.9	976.8	2.7	1.7	30	0.328	29.4	125.36	17	2	0.165625	5.95979	97.2961	0.135758	0.149334
8	7	8.59	125	974.7	978.9	976.8	2.7	1.7	30	0.328	29.4	125.36	17	2	0.165625	5.95979	97.2961	0.135758	0.199565
9	7	8.59	125	974.7	978.9	976.8	2.7	1.7	30	0.328	29.4	125.36	17	2	0.165625	5.95979	97.2961	0.135758	0.194134
10	7	8.59	125	974.7	978.9	976.8	2.7	1.7	30	0.328	29.4	125.36	17	2	0.165625	5.95979	97.2961	0.135758	0.111322
11	7	8.59	125	974.7	978.9	976.8	2.7	1.7	30	0.328	29.4	125.36	17	2	0.165625	5.95979	97.2961	0.135758	0.0638064
1	7	8.59	125	979.4	984	981.7	3	0.7	35	0.073	27.6	115.22	15	2	0.0151783	0.546171	97.2961	0.0124413	0.0204037
2	7	8.59	125	979.4	984	981.7	3	0.7	35	0.073	27.6	115.22	15	2	0.0151783	0.546171	97.2961	0.0124413	0.0130633
3	7	8.59	125	979.4	984	981.7	3	0.7	35	0.073	27.6	115.22	15	2	0.0151783	0.546171	97.2961	0.0124413	0.0150539
4	7	8.59	125	979.4	984	981.7	3	0.7	35	0.073	27.6	115.22	15	2	0.0151783	0.546171	97.2961	0.0124413	0.00933095
5	7	8.59	125	979.4	984	981.7	3	0.7	35	0.073	27.6	115.22	15	2	0.0151783	0.546171	97.2961	0.0124413	0.0126901
6	7	8.59	125	979.4	984	981.7	3	0.7	35	0.073	27.6	115.22	15	2	0.0151783	0.546171	97.2961	0.0124413	0.00808682
7	7	8.59	125	979.4	984	981.7	3	0.7	35	0.073	27.6	115.22	15	2	0.0151783	0.546171	97.2961	0.0124413	0.0136854
8	7	8.59	125	979.4	984	981.7	3	0.7	35	0.073	27.6	115.22	15	2	0.0151783	0.546171	97.2961	0.0124413	0.0182887
9	7	8.59	125	979.4	984	981.7	3	0.7	35	0.073	27.6	115.22	15	2	0.0151783	0.546171	97.2961	0.0124413	0.017791
10	7	8.59	125	979.4	984	981.7	3	0.7	35	0.073	27.6	115.22	15	2	0.0151783	0.546171	97.2961	0.0124413	0.0102018
11	7	8.59	125	979.4	984	981.7	3	0.7	35	0.073	27.6	115.22	15	2	0.0151783	0.546171	97.2961	0.0124413	0.00584739
1	7	8.59	125	986.8	990.7	988.75	3.4	2.5	32	0.489	30.3	125.3	17	2	0.363122	13.0664	97.2961	0.297641	0.488131
2	7	8.59	125	986.8	990.7	988.75	3.4	2.5	32	0.489	30.3	125.3	17	2	0.363122	13.0664	97.2961	0.297641	0.312523
3	7	8.59	125	986.8	990.7	988.75	3.4	2.5	32	0.489	30.3	125.3	17	2	0.363122	13.0664	97.2961	0.297641	0.360145
4	7	8.59	125	986.8	990.7	988.75	3.4	2.5	32	0.489	30.3	125.3	17	2	0.363122	13.0664	97.2961	0.297641	0.223231
5	7	8.59	125	986.8	990.7	988.75	3.4	2.5	32	0.489	30.3	125.3	17	2	0.363122	13.0664	97.2961	0.297641	0.303594
6	7	8.59	125	986.8	990.7	988.75	3.4	2.5	32	0.489	30.3	125.3	17	2	0.363122	13.0664	97.2961	0.297641	0.193467
7	7	8.59	125	986.8	990.7	988.75	3.4	2.5	32	0.489	30.3	125.3	17	2	0.363122	13.0664	97.2961	0.297641	0.327405
8	7	8.59	125	986.8	990.7	988.75	3.4	2.5	32	0.489	30.3	125.3	17	2	0.363122	13.0664	97.2961	0.297641	0.437532
9	7	8.59	125	986.8	990.7	988.75	3.4	2.5	32	0.489	30.3	125.3	17	2	0.363122	13.0664	97.2961	0.297641	0.425626
10	7	8.59	125	986.8	990.7	988.75	3.4	2.5	32	0.489	30.3	125.3	17	2	0.363122	13.0664	97.2961	0.297641	0.244065
11	7	8.59	125	986.8	990.7	988.75	3.4	2.5	32	0.489	30.3	125.3	17	2	0.363122	13.0664	97.2961	0.297641	0.139891
1	7	10.21	125	910.9	917.9	914.4	7	5.4	31.6	0.615	30	76.36	12	1	1.52909	27.7832	94.7835	0.961689	3.66403
2	7	10.21	125	910.9	917.9	914.4	7	5.4	31.6	0.615	30	76.36	12	1	1.52909	27.7832	94.7835	0.961689	2.98124
3	7	10.21	125	910.9	917.9	914.4	7	5.4	31.6	0.615	30	76.36	12	1	1.52909	27.7832	94.7835	0.961689	3.15434
4	7	10.21	125	910.9	917.9	914.4	7	5.4	31.6	0.615	30	76.36	12	1	1.52909	27.7832	94.7835	0.961689	3.51978
5	7	10.21	125	910.9	917.9	914.4	7	5.4	31.6	0.615	30	76.36	12	1	1.52909	27.7832	94.7835	0.961689	3.61595
6	7	10.21	125	910.9	917.9	914.4	7	5.4	31.6	0.615	30	76.36	12	1	1.52909	27.7832	94.7835	0.961689	2.50039
7	7	10.21	125	910.9	917.9	914.4	7	5.4	31.6	0.615	30	76.36	12	1	1.52909	27.7832	94.7835	0.961689	1.08671
8	7	10.21	125	910.9	917.9	914.4	7	5.4	31.6	0.615	30	76.36	12	1	1.52909	27.7832	94.7835	0.961689	0.932838
1	7	10.21	125	910.3	917	913.65	6.7	4.5	24	0.727	31.6	89.95	14	1	3.01014	14.2185	82.5283	0.650139	1.77488
2	7	10.21	125	910.3	917	913.65	6.7	4.5	24	0.727	31.6	89.95	14	1	3.01014	14.2185	82.5283	0.650139	0.929699
3	7	10.21	125	910.3	917	913.65	6.7	4.5	24	0.727	31.6	89.95	14	1	3.01014	14.2185	82.5283	0.650139	0.526613
4	7	10.21	125	910.3	917	913.65	6.7	4.5	24	0.727	31.6	89.95	14	1	3.01014	14.2185	82.5283	0.650139	0.910195
5	7	10.21	125	910.3	917	913.65	6.7	4.5	24	0.727	31.6	89.95	14	1	3.01014	14.2185	82.5283	0.650139	1.00772
6	7	10.21	125	910.3	917	913.65	6.7	4.5	24	0.727	31.6	89.95	14	1	3.01014	14.2185	82.5283	0.650139	0.70215
7	7	10.21	125	910.3	917	913.65	6.7	4.5	24	0.727	31.6	89.95	14	1	3.01014	14.2185	82.5283	0.650139	0.55912
8	7	10.21	125	910.3	917	913.65	6.7	4.5	24	0.727	31.6	89.95	14	1	3.01014	14.2185	82.5283	0.650139	0.253554
1	7	10.21	125	921.8	926.4	924.1	4.6	4.3	24	0.619	31.4	75.46	12	1	2.70206	13.3378	83.1541	0.574906	0.764625
2	7	10.21	125	921.8	926.4	924.1	4.6	4.3	24	0.619	31.4	75.46	12	1	2.70206	13.3378	83.1541	0.574906	1.19006
3	7	10.21	125	921.8	926.4	924.1	4.6	4.3	24	0.619	31.4	75.46	12	1	2.70206	13.3378	83.1541	0.574906	1.87994
4	7	10.21	125	921.8	926.4	924.1	4.6	4.3	24	0.619	31.4	75.46	12	1	2.70206	13.3378	83.1541	0.574906	2.38586
5	7	10.21	125	921.8	926.4	924.1	4.6	4.3	24	0.619	31.4	75.46	12	1	2.70206	13.3378	83.1541	0.574906	3.20223
6	7	10.21	125	921.8	926.4	924.1	4.6	4.3	24	0.619	31.4	75.46	12	1	2.70206	13.3378	83.1541	0.574906	2.90328
7	7	10.21	125	921.8	926.4	924.1	4.6	4.3	24	0.619	31.4	75.46	12	1	2.70206	13.3378	83.1541	0.574906	2.45485
8	7	10.21	125	921.8	926.4	924.1	4.6	4.3	24	0.619	31.4	75.46	12	1	2.70206	13.3378	83.1541	0.574906	1.57524
9	7	10.21	125	921.8	926.4	924.1	4.6	4.3	24	0.619	31.4	75.46	12	1	2.70206	13.3378	83.1541	0.574906	1.58674
1	7	10.35	106	920.6	925.7	923.15	6	2.6	31.6	0.917	35	142.62	23	2	0.940695	4.81875	83.6669	0.461125	2.55924
2	7	10.35	106	920.6	925.7	923.15	6	2.6	31.6	0.917	35	142.62	23	2	0.940695	4.81875	83.6669	0.461125	2.24107
3	7	10.35	106	920.6	925.7	923.15	6	2.6	31.6	0.917	35	142.62	23	2	0.940695	4.81875	83.6669	0.461125	2.14884
4	7	10.35	106	920.6	925.7	923.15	6	2.6	31.6	0.917	35	142.62	23	2	0.940695	4.81875	83.6669	0.461125	1.75227
5	7	10.35	106	920.6	925.7	923.15	6	2.6	31.6	0.917	35	142.62	23	2	0.940695	4.81875	83.6669	0.461125	1.49866
6	7	10.35	106	920.6	925.7	923.15	6	2.6	31.6	0.917	35	142.62	23	2	0.940695	4.81875	83.6669	0.461125	1.24043
7	7	10.35	106	920.6	925.7	923.15	6	2.6	31.6	0.917	35	142.62	23	2	0.940695	4.81875	83.6669	0.461125	1.1067
8	7	10.35	106	920.6	925.7	923.15	6	2.6	31.6	0.917	35	142.62	23	2	0.940695	4.81875	83.6669	0.461125	0.55335
9	7	10.35	106	920.6	925.7	923.15	6	2.6	31.6	0.917	35	142.62	23	2	0.940695	4.81875	83.6669	0.461125	0.40579
10	7	10.35	106	920.6	925.7	923.15	6	2.6	31.6	0.917	35	142.62	23	2	0.940695	4.81875	83.6669	0.461125	0.594851
11	7	10.35	106	920.6	925.7	923.15	6	2.6	31.6	0.917	35	142.62	23	2	0.940695	4.81875	83.6669	0.461125	0.124504
12	7	10.35	106	920.6	925.7	923.15	6	2.6	31.6	0.917	35	142.62	23	2	0.940695	4.81875	83.6669	0.461125	0.179839
1	7	9.32	125	894.2	902.3	898.25	7.8	6	31.6	0.199	34	186.64	29	2	0.722969	4.92988	87.2105	0.297518	0.395699
2	7	9.32	125	894.2	902.3	898.25	7.8	6	31.6	0.199	34	186.64	29	2	0.722969	4.92988	87.2105	0.297518	0.351071
1	7	10.21	125	959.2	964.7	961.95	5.5	4.9	31.7	0.779	28	100.15	15	1	1.80215	18.1041	90.9468	0.750895	3.6043
2	7	10.21	125	959.2	964.7	961.95	5.5	4.9	31.7	0.779	28	100.15	15	1	1.80215	18.1041	90.9468	0.750895	2.80084
3	7	10.21	125	959.2	964.7	961.95	5.5	4.9	31.7	0.779	28	100.15	15	1	1.80215	18.1041	90.9468	0.750895	2.40286
4	7	10.21	125	959.2	964.7	961.95	5.5	4.9	31.7	0.779	28	100.15	15	1	1.80215	18.1041	90.9468	0.750895	3.13123
5	7	10.21	125	959.2	964.7	961.95	5.5	4.9	31.7	0.779	28	100.15	15	1	1.80215	18.1041	90.9468	0.750895	2.83838
6	7	10.21	125	959.2	964.7	961.95	5.5	4.9	31.7	0.779	28	100.15	15	1	1.80215	18.1041	90.9468	0.750895	4.25007
7	7	10.21	125	959.2	964.7	961.95	5.5	4.9	31.7	0.779	28	100.15	15	1	1.80215	18.1041	90.9468	0.750895	5.98463
8	7	10.21	125	959.2	964.7	961.95	5.5	4.9	31.7	0.779	28	100.15	15	1	1.80215	18.1041	90.9468	0.750895	5.56413
9	7	10.21	125	959.2	964.7	961.95	5.5	4.9	31.7	0.779	28	100.15	15	1	1.80215	18.1041	90.9468	0.750895	5.72933
1	7	10.21	125	833.6	846.7	840.15	10.9	5.5	31	0.659	31.6	190.16	33	2	5.10602	24.8745	82.9689	0.771301	4.51983
2	7	10.21	125	833.6	846.7	840.15	10.9	5.5	31	0.659	31.6	190.16	33	2	5.10602	24.8745	82.9689	0.771301	1.85112
1	7	10.21	125	907.3	914.8	911.05	7	5.1	32.4	1.314	27.5	91.12	15	1	2.5968	21.1892	89.0827	0.829648	2.3645
2	7	10.21	125	907.3	914.8	911.05	7	5.1	32.4	1.314	27.5	91.12	15	1	2.5968	21.1892	89.0827	0.829648	1.58463
1	7	10.21	125	909	913.3	911.15	4.3	3.3	30.8	0.732	30	106.05	17	1	2.88172	11.1763	79.5012	0.701149	5.78448
2	7	10.21	125	909	913.3	911.15	4.3	3.3	30.8	0.732	30	106.05	17	1	2.88172	11.1763	79.5012	0.701149	1.16391
3	7	10.21	125	909	913.3	911.15	4.3	3.3	30.8	0.732	30	106.05	17	1	2.88172	11.1763	79.5012	0.701149	0.182299
4	7	10.21	125	909	913.3	911.15	4.3	3.3	30.8	0.732	30	106.05	17	1	2.88172	11.1763	79.5012	0.701149	0.778276
5	7	10.21	125	909	913.3	911.15	4.3	3.3	30.8	0.732	30	106.05	17	1	2.88172	11.1763	79.5012	0.701149	0.315517
1	7	10.21	125	919.9	930	924.95	7.6	6.2	31.4	0.87	34	175	29	2	3.40844	20.6971	85.8604	0.849984	7.24187
2	7	10.21	125	919.9	930	924.95	7.6	6.2	31.4	0.87	34	175	29	2	3.40844	20.6971	85.8604	0.849984	6.45138
3	7	10.21	125	919.9	930	924.95	7.6	6.2	31.4	0.87	34	175	29	2	3.40844	20.6971	85.8604	0.849984	3.85893
4	7	10.21	125	919.9	930	924.95	7.6	6.2	31.4	0.87	34	175	29	2	3.40844	20.6971	85.8604	0.849984	3.76543
5	7	10.21	125	919.9	930	924.95	7.6	6.2	31.4	0.87	34	175	29	2	3.40844	20.6971	85.8604	0.849984	3.46794
6	7	10.21	125	919.9	930	924.95	7.6	6.2	31.4	0.87	34	175	29	2	3.40844	20.6971	85.8604	0.849984	3.18744
7	7	10.21	125	919.9	930	924.95	7.6	6.2	31.4	0.87	34	175	29	2	3.40844	20.6971	85.8604	0.849984	3.37444
8	7	10.21	125	919.9	930	924.95	7.6	6.2	31.4	0.87	34	175	29	2	3.40844	20.6971	85.8604	0.849984	2.29496
9	7	10.21	125	919.9	930	924.95	7.6	6.2	31.4	0.87	34	175	29	2	3.40844	20.6971	85.8604	0.849984	1.87847
10	7	10.21	125	919.9	930	924.95	7.6	6.2	31.4	0.87	34	175	29	2	3.40844	20.6971	85.8604	0.849984	3.48494
11	7	10.21	125	919.9	930	924.95	7.6	6.2	31.4	0.87	34	175	29	2	3.40844	20.6971	85.8604	0.849984	1.53847
12	7	10.21	125	919.9	930	924.95	7.6	6.2	31.4	0.87	34	175	29	2	3.40844	20.6971	85.8604	0.849984	0.654488
1	7	9.06	150	1013.9	1016.7	1015.3	2.8	1.6	26	0.576	31.6	45.24	4	1	0	0	0	0.852386	1.32972
2	7	9.06	150	1013.9	1016.7	1015.3	2.8	1.6	26	0.576	31.6	45.24	4	1	0	0	0	0.852386	2.19916
3	7	9.06	150	1013.9	1016.7	1015.3	2.8	1.6	26	0.576	31.6	45.24	4	1	0	0	0	0.852386	1.56839
4	7	9.06	150	1013.9	1016.7	1015.3	2.8	1.6	26	0.576	31.6	45.24	4	1	0	0	0	0.852386	1.1081
1	7	9.06	150	1040.7	1042.8	1041.75	2.1	0.7	33	0.228	28.4	45.24	4	1	0	0	0	0.147614	0.230277
2	7	9.06	150	1040.7	1042.8	1041.75	2.1	0.7	33	0.228	28.4	45.24	4	1	0	0	0	0.147614	0.380844
3	7	9.06	150	1040.7	1042.8	1041.75	2.1	0.7	33	0.228	28.4	45.24	4	1	0	0	0	0.147614	0.271609
4	7	9.06	150	1040.7	1042.8	1041.75	2.1	0.7	33	0.228	28.4	45.24	4	1	0	0	0	0.147614	0.191898
1	7	12.2	175	1006.5	1015.2	1010.85	8.7	7.8	27	0.7	29	250	46	1	0	0	0	0.43128	1.10839
2	7	12.2	175	1006.5	1015.2	1010.85	8.7	7.8	27	0.7	29	250	46	1	0	0	0	0.43128	0.741801
3	7	12.2	175	1006.5	1015.2	1010.85	8.7	7.8	27	0.7	29	250	46	1	0	0	0	0.43128	0.866872
4	7	12.2	175	1006.5	1015.2	1010.85	8.7	7.8	27	0.7	29	250	46	1	0	0	0	0.43128	0.966066
1	7	12.2	175	1023.7	1030	1026.85	6.3	6	30	1.2	30.4	250	46	1	0	0	0	0.56872	1.46161
2	7	12.2	175	1023.7	1030	1026.85	6.3	6	30	1.2	30.4	250	46	1	0	0	0	0.56872	0.978199
3	7	12.2	175	1023.7	1030	1026.85	6.3	6	30	1.2	30.4	250	46	1	0	0	0	0.56872	1.14313
4	7	12.2	175	1023.7	1030	1026.85	6.3	6	30	1.2	30.4	250	46	1	0	0	0	0.56872	1.27393
1	7	8.84	106	1017.5	1018.3	1017.9	0.8	0.3	22	0.061	26.3	50.1	5	1	0	0	0	0.18429	0.237734
2	7	8.84	106	1017.5	1018.3	1017.9	0.8	0.3	22	0.061	26.3	50.1	5	1	0	0	0	0.18429	0.276435
3	7	8.84	106	1017.5	1018.3	1017.9	0.8	0.3	22	0.061	26.3	50.1	5	1	0	0	0	0.18429	0.289335
4	7	8.84	106	1017.5	1018.3	1017.9	0.8	0.3	22	0.061	26.3	50.1	5	1	0	0	0	0.18429	0.340937
1	7	8.84	106	1019	1020.6	1019.8	1.6	0.3	26	0.038	24.9	50.1	5	1	0	0	0	0.114804	0.148097
2	7	8.84	106	1019	1020.6	1019.8	1.6	0.3	26	0.038	24.9	50.1	5	1	0	0	0	0.114804	0.172205
3	7	8.84	106	1019	1020.6	1019.8	1.6	0.3	26	0.038	24.9	50.1	5	1	0	0	0	0.114804	0.180242
4	7	8.84	106	1019	1020.6	1019.8	1.6	0.3	26	0.038	24.9	50.1	5	1	0	0	0	0.114804	0.212387
1	7	8.84	106	1029.8	1031.4	1030.6	1.4	0.3	33	0.107	27.2	80.06	7	1	0	0	0	0.323263	0.417009
2	7	8.84	106	1029.8	1031.4	1030.6	1.4	0.3	33	0.107	27.2	80.06	7	1	0	0	0	0.323263	0.484894
3	7	8.84	106	1029.8	1031.4	1030.6	1.4	0.3	33	0.107	27.2	80.06	7	1	0	0	0	0.323263	0.507523
4	7	8.84	106	1029.8	1031.4	1030.6	1.4	0.3	33	0.107	27.2	80.06	7	1	0	0	0	0.323263	0.598036
1	7	8.84	106	1042.3	1043.8	1043.05	0.9	0.4	34	0.048	25.6	49.92	5	1	0	0	0	0.193353	0.249426
2	7	8.84	106	1042.3	1043.8	1043.05	0.9	0.4	34	0.048	25.6	49.92	5	1	0	0	0	0.193353	0.29003
3	7	8.84	106	1042.3	1043.8	1043.05	0.9	0.4	34	0.048	25.6	49.92	5	1	0	0	0	0.193353	0.303565
4	7	8.84	106	1042.3	1043.8	1043.05	0.9	0.4	34	0.048	25.6	49.92	5	1	0	0	0	0.193353	0.357704
1	7	8.84	106	1046.8	1048.5	1047.65	2.3	0.3	31	0.061	26.6	95.02	9	1	0	0	0	0.18429	0.237734
2	7	8.84	106	1046.8	1048.5	1047.65	2.3	0.3	31	0.061	26.6	95.02	9	1	0	0	0	0.18429	0.276435
3	7	8.84	106	1046.8	1048.5	1047.65	2.3	0.3	31	0.061	26.6	95.02	9	1	0	0	0	0.18429	0.289335
4	7	8.84	106	1046.8	1048.5	1047.65	2.3	0.3	31	0.061	26.6	95.02	9	1	0	0	0	0.18429	0.340937
1	7	13.1	125	920.2	928.6	924.4	8.4	7.4	28	0.802	31.7	128.7	21	1	1.09799	20.2948	94.8675	0.899989	2.69097
2	7	13.1	125	920.2	928.6	924.4	8.4	7.4	28	0.802	31.7	128.7	21	1	1.09799	20.2948	94.8675	0.899989	1.31398
3	7	13.1	125	920.2	928.6	924.4	8.4	7.4	28	0.802	31.7	128.7	21	1	1.09799	20.2948	94.8675	0.899989	0.566993
1	7	13.1	125	856.4	864.4	860.4	8	7.3	28.36	0.773	31.6	131.84	19	1	1.56209	15.9809	91.0956	0.719859	4.17518
2	7	13.1	125	856.4	864.4	860.4	8	7.3	28.36	0.773	31.6	131.84	19	1	1.56209	15.9809	91.0956	0.719859	2.09479
3	7	13.1	125	856.4	864.4	860.4	8	7.3	28.36	0.773	31.6	131.84	19	1	1.56209	15.9809	91.0956	0.719859	1.92922
1	7	10.9	125	922.8	935.9	929.35	13.1	11.9	27	1.215	32.5	70	12	1	2.23285	28.135	92.6473	0.509784	2.08502
2	7	10.9	125	922.8	935.9	929.35	13.1	11.9	27	1.215	32.5	70	12	1	2.23285	28.135	92.6473	0.509784	1.8964
3	7	10.9	125	922.8	935.9	929.35	13.1	11.9	27	1.215	32.5	70	12	1	2.23285	28.135	92.6473	0.509784	1.99835
1	7	10.9	125	943.7	953.7	948.7	10	9.3	26	1.144	31.9	70	12	1	1.64303	20.703	92.6473	0.375122	1.53425
2	7	10.9	125	943.7	953.7	948.7	10	9.3	26	1.144	31.9	70	12	1	1.64303	20.703	92.6473	0.375122	1.39545
3	7	10.9	125	943.7	953.7	948.7	10	9.3	26	1.144	31.9	70	12	1	1.64303	20.703	92.6473	0.375122	1.47048
1	7	10.9	125	929	938.7	933.85	9	7	33.2	0.92	31.6	165.69	27	2	2.72075	22.7434	89.3154	0.880503	11.922
2	7	10.9	125	929	938.7	933.85	9	7	33.2	0.92	31.6	165.69	27	2	2.72075	22.7434	89.3154	0.880503	9.50943
3	7	10.9	125	929	938.7	933.85	9	7	33.2	0.92	31.6	165.69	27	2	2.72075	22.7434	89.3154	0.880503	2.8
1	7	10.9	125	912	921.2	916.6	9.2	8.3	33	0.859	31.6	74.92	12	1	1.30746	19.7081	93.7786	0.640912	0.51273
2	7	10.9	125	912	921.2	916.6	9.2	8.3	33	0.859	31.6	74.92	12	1	1.30746	19.7081	93.7786	0.640912	0.326865
3	7	10.9	125	912	921.2	916.6	9.2	8.3	33	0.859	31.6	74.92	12	1	1.30746	19.7081	93.7786	0.640912	0.108955
1	7	10.21	125	965.2	972.9	969.05	7.7	5.3	29	0.582	31.4	85.68	14	1	0.383811	5.90313	93.8951	0.540579	0.113522
2	7	10.21	125	965.2	972.9	969.05	7.7	5.3	29	0.582	31.4	85.68	14	1	0.383811	5.90313	93.8951	0.540579	0.383811
3	7	10.21	125	965.2	972.9	969.05	7.7	5.3	29	0.582	31.4	85.68	14	1	0.383811	5.90313	93.8951	0.540579	0.464898
4	7	10.21	125	965.2	972.9	969.05	7.7	5.3	29	0.582	31.4	85.68	14	1	0.383811	5.90313	93.8951	0.540579	0.740594
5	7	10.21	125	965.2	972.9	969.05	7.7	5.3	29	0.582	31.4	85.68	14	1	0.383811	5.90313	93.8951	0.540579	0.664913
6	7	10.21	125	965.2	972.9	969.05	7.7	5.3	29	0.582	31.4	85.68	14	1	0.383811	5.90313	93.8951	0.540579	1.08116
7	7	10.21	125	965.2	972.9	969.05	7.7	5.3	29	0.582	31.4	85.68	14	1	0.383811	5.90313	93.8951	0.540579	1.04872
8	7	10.21	125	965.2	972.9	969.05	7.7	5.3	29	0.582	31.4	85.68	14	1	0.383811	5.90313	93.8951	0.540579	0.789246
9	7	10.21	125	965.2	972.9	969.05	7.7	5.3	29	0.582	31.4	85.68	14	1	0.383811	5.90313	93.8951	0.540579	0.800057
10	7	10.21	125	965.2	972.9	969.05	7.7	5.3	29	0.582	31.4	85.68	14	1	0.383811	5.90313	93.8951	0.540579	0.654101
1	7	10.21	125	944.2	949.9	947.05	5.7	4.8	24.5	0.573	30	75.68	12	1	1.63558	25.4889	93.9701	0.624268	0.53687
2	7	10.21	125	944.2	949.9	947.05	5.7	4.8	24.5	0.573	30	75.68	12	1	1.63558	25.4889	93.9701	0.624268	0.79282
3	7	10.21	125	944.2	949.9	947.05	5.7	4.8	24.5	0.573	30	75.68	12	1	1.63558	25.4889	93.9701	0.624268	0.243465
4	7	10.21	125	944.2	949.9	947.05	5.7	4.8	24.5	0.573	30	75.68	12	1	1.63558	25.4889	93.9701	0.624268	0.555599
5	7	10.21	125	944.2	949.9	947.05	5.7	4.8	24.5	0.573	30	75.68	12	1	1.63558	25.4889	93.9701	0.624268	0.530628
6	7	10.21	125	944.2	949.9	947.05	5.7	4.8	24.5	0.573	30	75.68	12	1	1.63558	25.4889	93.9701	0.624268	0.305891
7	7	10.21	125	944.2	949.9	947.05	5.7	4.8	24.5	0.573	30	75.68	12	1	1.63558	25.4889	93.9701	0.624268	0.799063
8	7	10.21	125	944.2	949.9	947.05	5.7	4.8	24.5	0.573	30	75.68	12	1	1.63558	25.4889	93.9701	0.624268	0.761607
9	7	10.21	125	944.2	949.9	947.05	5.7	4.8	24.5	0.573	30	75.68	12	1	1.63558	25.4889	93.9701	0.624268	0.237222
10	7	10.21	125	944.2	949.9	947.05	5.7	4.8	24.5	0.573	30	75.68	12	1	1.63558	25.4889	93.9701	0.624268	1.04253
11	7	10.21	125	944.2	949.9	947.05	5.7	4.8	24.5	0.573	30	75.68	12	1	1.63558	25.4889	93.9701	0.624268	0.761607
12	7	10.21	125	944.2	949.9	947.05	5.7	4.8	24.5	0.573	30	75.68	12	1	1.63558	25.4889	93.9701	0.624268	0.156067
1	7	10.21	125	942.7	951.7	947.2	7.4	5.3	29	0.75	31.5	77.36	12	1	3.78438	35.3822	90.3377	0.734832	3.73295
2	7	10.21	125	942.7	951.7	947.2	7.4	5.3	29	0.75	31.5	77.36	12	1	3.78438	35.3822	90.3377	0.734832	1.15369
3	7	10.21	125	942.7	951.7	947.2	7.4	5.3	29	0.75	31.5	77.36	12	1	3.78438	35.3822	90.3377	0.734832	0.69809
4	7	10.21	125	942.7	951.7	947.2	7.4	5.3	29	0.75	31.5	77.36	12	1	3.78438	35.3822	90.3377	0.734832	1.35209
1	7	13.07	125	907.9	914.8	911.35	6.5	5.6	31.7	0.75	33	140.18	23	2	2.29477	15.8449	87.3494	0.437099	1.11897
1	7	13.07	125	916.2	922.7	919.45	6.1	4.5	31.6	0.903	29	174.36	29	2	2.86689	20.89	87.9324	0.461656	1.11721
2	7	13.07	125	916.2	922.7	919.45	6.1	4.5	31.6	0.903	29	174.36	29	2	2.86689	20.89	87.9324	0.461656	2.13285
3	7	13.07	125	916.2	922.7	919.45	6.1	4.5	31.6	0.903	29	174.36	29	2	2.86689	20.89	87.9324	0.461656	1.94819
4	7	13.07	125	916.2	922.7	919.45	6.1	4.5	31.6	0.903	29	174.36	29	2	2.86689	20.89	87.9324	0.461656	1.70813
5	7	13.07	125	916.2	922.7	919.45	6.1	4.5	31.6	0.903	29	174.36	29	2	2.86689	20.89	87.9324	0.461656	0.946396
6	7	13.07	125	916.2	922.7	919.45	6.1	4.5	31.6	0.903	29	174.36	29	2	2.86689	20.89	87.9324	0.461656	0.401641
7	7	13.07	125	916.2	922.7	919.45	6.1	4.5	31.6	0.903	29	174.36	29	2	2.86689	20.89	87.9324	0.461656	0.304693
8	7	13.07	125	916.2	922.7	919.45	6.1	4.5	31.6	0.903	29	174.36	29	2	2.86689	20.89	87.9324	0.461656	0.032316
1	7	13.07	125	921	937.2	929.1	14.1	12.8	0	0.802	31.5	144.12	23	2	3.86799	35.5219	90.1802	0.816032	0.456978
2	7	13.07	125	921	937.2	929.1	14.1	12.8	0	0.802	31.5	144.12	23	2	3.86799	35.5219	90.1802	0.816032	0.913956
3	7	13.07	125	921	937.2	929.1	14.1	12.8	0	0.802	31.5	144.12	23	2	3.86799	35.5219	90.1802	0.816032	0.52226
4	7	13.07	125	921	937.2	929.1	14.1	12.8	0	0.802	31.5	144.12	23	2	3.86799	35.5219	90.1802	0.816032	0.350894
1	7	11	125	907.1	914.7	910.9	6.4	4	26	0.78	31.6	107.92	17	2	1.60525	8.49091	84.1004	0.469371	1.76953
2	7	11	125	907.1	914.7	910.9	6.4	4	26	0.78	31.6	107.92	17	2	1.60525	8.49091	84.1004	0.469371	1.54423
3	7	11	125	907.1	914.7	910.9	6.4	4	26	0.78	31.6	107.92	17	2	1.60525	8.49091	84.1004	0.469371	2.92887
4	7	11	125	907.1	914.7	910.9	6.4	4	26	0.78	31.6	107.92	17	2	1.60525	8.49091	84.1004	0.469371	3.23396
5	7	11	125	907.1	914.7	910.9	6.4	4	26	0.78	31.6	107.92	17	2	1.60525	8.49091	84.1004	0.469371	2.37032
6	7	11	125	907.1	914.7	910.9	6.4	4	26	0.78	31.6	107.92	17	2	1.60525	8.49091	84.1004	0.469371	0.12673
1	7	8.85	175	963.5	969.6	966.55	5.5	4.6	35	0.966	31.5	205	37	2	0.930601	11.4091	92.4585	0.409956	0.721523
2	7	8.85	175	963.5	969.6	966.55	5.5	4.6	35	0.966	31.5	205	37	2	0.930601	11.4091	92.4585	0.409956	0.102489
3	7	8.85	175	963.5	969.6	966.55	5.5	4.6	35	0.966	31.5	205	37	2	0.930601	11.4091	92.4585	0.409956	0.245974
4	7	8.85	175	963.5	969.6	966.55	5.5	4.6	35	0.966	31.5	205	37	2	0.930601	11.4091	92.4585	0.409956	2.71801
5	7	8.85	175	963.5	969.6	966.55	5.5	4.6	35	0.966	31.5	205	37	2	0.930601	11.4091	92.4585	0.409956	1.98829
6	7	8.85	175	963.5	969.6	966.55	5.5	4.6	35	0.966	31.5	205	37	2	0.930601	11.4091	92.4585	0.409956	2.59502
7	7	8.85	175	963.5	969.6	966.55	5.5	4.6	35	0.966	31.5	205	37	2	0.930601	11.4091	92.4585	0.409956	3.37804
8	7	8.85	175	963.5	969.6	966.55	5.5	4.6	35	0.966	31.5	205	37	2	0.930601	11.4091	92.4585	0.409956	3.54612
9	7	8.85	175	963.5	969.6	966.55	5.5	4.6	35	0.966	31.5	205	37	2	0.930601	11.4091	92.4585	0.409956	3.22226
1	7	8.85	175	974.9	980	977.45	5.1	4.6	31	1.038	31.3	85	15	1	0.999963	12.2595	92.4585	0.440512	0.775301
2	7	8.85	175	974.9	980	977.45	5.1	4.6	31	1.038	31.3	85	15	1	0.999963	12.2595	92.4585	0.440512	0.110128
3	7	8.85	175	974.9	980	977.45	5.1	4.6	31	1.038	31.3	85	15	1	0.999963	12.2595	92.4585	0.440512	0.264307
4	7	8.85	175	974.9	980	977.45	5.1	4.6	31	1.038	31.3	85	15	1	0.999963	12.2595	92.4585	0.440512	2.9206
5	7	8.85	175	974.9	980	977.45	5.1	4.6	31	1.038	31.3	85	15	1	0.999963	12.2595	92.4585	0.440512	2.13648
6	7	8.85	175	974.9	980	977.45	5.1	4.6	31	1.038	31.3	85	15	1	0.999963	12.2595	92.4585	0.440512	2.78844
7	7	8.85	175	974.9	980	977.45	5.1	4.6	31	1.038	31.3	85	15	1	0.999963	12.2595	92.4585	0.440512	3.62982
8	7	8.85	175	974.9	980	977.45	5.1	4.6	31	1.038	31.3	85	15	1	0.999963	12.2595	92.4585	0.440512	3.81043
9	7	8.85	175	974.9	980	977.45	5.1	4.6	31	1.038	31.3	85	15	1	0.999963	12.2595	92.4585	0.440512	3.46243
1	7	13.07	125	952	959	955.5	7	6.1	31.7	0.516	25	58.53	9	1	3.68914	16.377	81.6151	0.540138	3.10039
2	7	13.07	125	952	959	955.5	7	6.1	31.7	0.516	25	58.53	9	1	3.68914	16.377	81.6151	0.540138	3.39747
3	7	13.07	125	952	959	955.5	7	6.1	31.7	0.516	25	58.53	9	1	3.68914	16.377	81.6151	0.540138	0.97765
4	7	13.07	125	952	959	955.5	7	6.1	31.7	0.516	25	58.53	9	1	3.68914	16.377	81.6151	0.540138	0.880425
5	7	13.07	125	952	959	955.5	7	6.1	31.7	0.516	25	58.53	9	1	3.68914	16.377	81.6151	0.540138	1.45837
6	7	13.07	125	952	959	955.5	7	6.1	31.7	0.516	25	58.53	9	1	3.68914	16.377	81.6151	0.540138	0.82101
7	7	13.07	125	952	959	955.5	7	6.1	31.7	0.516	25	58.53	9	1	3.68914	16.377	81.6151	0.540138	0.199851
8	7	13.07	125	952	959	955.5	7	6.1	31.7	0.516	25	58.53	9	1	3.68914	16.377	81.6151	0.540138	0.329484
9	7	13.07	125	952	959	955.5	7	6.1	31.7	0.516	25	58.53	9	1	3.68914	16.377	81.6151	0.540138	0.378097
2	7	10.71	150	1096	1102.4	1099.2	6.4	5.6	29.2	0.511	24	91.28	15	1	0.993567	13.0048	92.9023	0.421003	1.70506
3	7	10.71	150	1096	1102.4	1099.2	6.4	5.6	29.2	0.511	24	91.28	15	1	0.993567	13.0048	92.9023	0.421003	1.24617
4	7	10.71	150	1096	1102.4	1099.2	6.4	5.6	29.2	0.511	24	91.28	15	1	0.993567	13.0048	92.9023	0.421003	0.854636
5	7	10.71	150	1096	1102.4	1099.2	6.4	5.6	29.2	0.511	24	91.28	15	1	0.993567	13.0048	92.9023	0.421003	0.774646
2	7	10.71	150	1105.7	1113.3	1109.5	7.6	6.8	29.3	0.565	27	91.28	15	1	1.33397	17.4603	92.9023	0.565241	2.28923
3	7	10.71	150	1105.7	1113.3	1109.5	7.6	6.8	29.3	0.565	27	91.28	15	1	1.33397	17.4603	92.9023	0.565241	1.67311
4	7	10.71	150	1105.7	1113.3	1109.5	7.6	6.8	29.3	0.565	27	91.28	15	1	1.33397	17.4603	92.9023	0.565241	1.14744
5	7	10.71	150	1105.7	1113.3	1109.5	7.6	6.8	29.3	0.565	27	91.28	15	1	1.33397	17.4603	92.9023	0.565241	1.04004
2	7	10.71	150	1114.9	1116.7	1115.8	1.3	0.5	27	0.187	31	114.8	19	1	0.0324638	0.424919	92.9023	0.0137559	0.0557113
3	7	10.71	150	1114.9	1116.7	1115.8	1.3	0.5	27	0.187	31	114.8	19	1	0.0324638	0.424919	92.9023	0.0137559	0.0407174
4	7	10.71	150	1114.9	1116.7	1115.8	1.3	0.5	27	0.187	31	114.8	19	1	0.0324638	0.424919	92.9023	0.0137559	0.0279244
5	7	10.71	150	1114.9	1116.7	1115.8	1.3	0.5	27	0.187	31	114.8	19	1	0.0324638	0.424919	92.9023	0.0137559	0.0253108
1	7	10.3	175	1088.8	1096.2	1092.5	6.5	5.8	34	0.893	32.3	210.12	31	1	0	0	0	0.905585	5.92252
2	7	10.3	175	1088.8	1096.2	1092.5	6.5	5.8	34	0.893	32.3	210.12	31	1	0	0	0	0.905585	4.74526
[truncated: 1,440 more rows]
