# Supplementary material for: Data-driven intelligent productivity prediction model for horizontal fracture stimulation
Source: Frontiers journal article supplement (doi:10.3389/feart.2025.1601363), 2025-08-01
Supplement: Table_6.xlsx [file Table_6.xlsx]

## Sheet: 08
Post-fracture duration(mon)	present fomraiton pressure(MPa)	well spacing(m)	depth at the top(m)	oil bed depth(m)	Depth of the central part of the oil layer(m)	Sandstone thickness(m)	Effective thickness(m)	Porosity(%)	permeability(μm)	Breakdown pressure(MPa)	Total liquid volume(m^3)	quantity of sand added(m^3)	Number of fracture slits (slits)	pre-fracture water content(%)	Capacity splitting factor(1)	Daily oil increase(t)
1	9.45	175	907.2	913.2	910.2	6	4.5	29.6	1.2	31	143.72	24	1	86.7268	0.910778	0.928993
2	9.45	175	907.2	913.2	910.2	6	4.5	29.6	1.2	31	143.72	24	1	86.7268	0.910778	1.46635
3	9.45	175	907.2	913.2	910.2	6	4.5	29.6	1.2	31	143.72	24	1	86.7268	0.910778	0.218587
1	9.83	175	932.4	939.7	936.05	7.3	5.6	31.7	0.914	18	119.24	19	1	90.3658	0.910877	3.48866
2	9.83	175	932.4	939.7	936.05	7.3	5.6	31.7	0.914	18	119.24	19	1	90.3658	0.910877	6.86801
3	9.83	175	932.4	939.7	936.05	7.3	5.6	31.7	0.914	18	119.24	19	1	90.3658	0.910877	6.35792
4	9.83	175	932.4	939.7	936.05	7.3	5.6	31.7	0.914	18	119.24	19	1	90.3658	0.910877	6.63118
5	9.83	175	932.4	939.7	936.05	7.3	5.6	31.7	0.914	18	119.24	19	1	90.3658	0.910877	6.65851
6	9.83	175	932.4	939.7	936.05	7.3	5.6	31.7	0.914	18	119.24	19	1	90.3658	0.910877	9.57332
7	9.83	175	932.4	939.7	936.05	7.3	5.6	31.7	0.914	18	119.24	19	1	90.3658	0.910877	10.6573
8	9.83	175	932.4	939.7	936.05	7.3	5.6	31.7	0.914	18	119.24	19	1	90.3658	0.910877	11.0398
9	9.83	175	932.4	939.7	936.05	7.3	5.6	31.7	0.914	18	119.24	19	1	90.3658	0.910877	10.2747
10	9.83	175	932.4	939.7	936.05	7.3	5.6	31.7	0.914	18	119.24	19	1	90.3658	0.910877	11.8505
11	9.83	175	932.4	939.7	936.05	7.3	5.6	31.7	0.914	18	119.24	19	1	90.3658	0.910877	6.22129
12	9.83	175	932.4	939.7	936.05	7.3	5.6	31.7	0.914	18	119.24	19	1	90.3658	0.910877	6.12109
1	11.91	125	1110.2	1117.4	1113.8	5.7	2.3	29.9	0.56	27	94.6	15	1	0	0.261486	1.50093
2	11.91	125	1110.2	1117.4	1113.8	5.7	2.3	29.9	0.56	27	94.6	15	1	0	0.261486	0.985801
3	11.91	125	1110.2	1117.4	1113.8	5.7	2.3	29.9	0.56	27	94.6	15	1	0	0.261486	1.00933
4	11.91	125	1110.2	1117.4	1113.8	5.7	2.3	29.9	0.56	27	94.6	15	1	0	0.261486	0.311168
5	11.91	125	1110.2	1117.4	1113.8	5.7	2.3	29.9	0.56	27	94.6	15	1	0	0.261486	0.261486
6	11.91	125	1110.2	1117.4	1113.8	5.7	2.3	29.9	0.56	27	94.6	15	1	0	0.261486	0.122898
7	11.91	125	1110.2	1117.4	1113.8	5.7	2.3	29.9	0.56	27	94.6	15	1	0	0.261486	0.232722
8	11.91	125	1110.2	1117.4	1113.8	5.7	2.3	29.9	0.56	27	94.6	15	1	0	0.261486	0.141202
9	11.91	125	1110.2	1117.4	1113.8	5.7	2.3	29.9	0.56	27	94.6	15	1	0	0.261486	0.290249
10	11.91	125	1110.2	1117.4	1113.8	5.7	2.3	29.9	0.56	27	94.6	15	1	0	0.261486	0.27979
11	11.91	125	1110.2	1117.4	1113.8	5.7	2.3	29.9	0.56	27	94.6	15	1	0	0.261486	0.290249
12	11.91	125	1110.2	1117.4	1113.8	5.7	2.3	29.9	0.56	27	94.6	15	1	0	0.261486	0.256256
1	11.91	125	1135.8	1142.6	1139.2	5.3	5	30.6	0.603	38	70.2	7	1	0	0.612096	3.51343
2	11.91	125	1135.8	1142.6	1139.2	5.3	5	30.6	0.603	38	70.2	7	1	0	0.612096	2.3076
3	11.91	125	1135.8	1142.6	1139.2	5.3	5	30.6	0.603	38	70.2	7	1	0	0.612096	2.36269
4	11.91	125	1135.8	1142.6	1139.2	5.3	5	30.6	0.603	38	70.2	7	1	0	0.612096	0.728394
5	11.91	125	1135.8	1142.6	1139.2	5.3	5	30.6	0.603	38	70.2	7	1	0	0.612096	0.612096
6	11.91	125	1135.8	1142.6	1139.2	5.3	5	30.6	0.603	38	70.2	7	1	0	0.612096	0.287685
7	11.91	125	1135.8	1142.6	1139.2	5.3	5	30.6	0.603	38	70.2	7	1	0	0.612096	0.544765
8	11.91	125	1135.8	1142.6	1139.2	5.3	5	30.6	0.603	38	70.2	7	1	0	0.612096	0.330532
9	11.91	125	1135.8	1142.6	1139.2	5.3	5	30.6	0.603	38	70.2	7	1	0	0.612096	0.679426
10	11.91	125	1135.8	1142.6	1139.2	5.3	5	30.6	0.603	38	70.2	7	1	0	0.612096	0.654942
11	11.91	125	1135.8	1142.6	1139.2	5.3	5	30.6	0.603	38	70.2	7	1	0	0.612096	0.679426
12	11.91	125	1135.8	1142.6	1139.2	5.3	5	30.6	0.603	38	70.2	7	1	0	0.612096	0.599854
1	11.72	125	1071.7	1078.9	1075.3	7.2	5.8	28.2	0.74	35	48.88	6	1	96.3445	0.447111	1.11778
2	11.72	125	1071.7	1078.9	1075.3	7.2	5.8	28.2	0.74	35	48.88	6	1	96.3445	0.447111	1.71691
3	11.72	125	1071.7	1078.9	1075.3	7.2	5.8	28.2	0.74	35	48.88	6	1	96.3445	0.447111	1.70797
4	11.72	125	1071.7	1078.9	1075.3	7.2	5.8	28.2	0.74	35	48.88	6	1	96.3445	0.447111	1.25638
5	11.72	125	1071.7	1078.9	1075.3	7.2	5.8	28.2	0.74	35	48.88	6	1	96.3445	0.447111	1.01047
6	11.72	125	1071.7	1078.9	1075.3	7.2	5.8	28.2	0.74	35	48.88	6	1	96.3445	0.447111	0.590187
7	11.72	125	1071.7	1078.9	1075.3	7.2	5.8	28.2	0.74	35	48.88	6	1	96.3445	0.447111	0.491822
8	11.72	125	1071.7	1078.9	1075.3	7.2	5.8	28.2	0.74	35	48.88	6	1	96.3445	0.447111	0.469467
9	11.72	125	1071.7	1078.9	1075.3	7.2	5.8	28.2	0.74	35	48.88	6	1	96.3445	0.447111	0.670667
10	11.72	125	1071.7	1078.9	1075.3	7.2	5.8	28.2	0.74	35	48.88	6	1	96.3445	0.447111	0.500765
11	11.72	125	1071.7	1078.9	1075.3	7.2	5.8	28.2	0.74	35	48.88	6	1	96.3445	0.447111	0.639369
12	11.72	125	1071.7	1078.9	1075.3	7.2	5.8	28.2	0.74	35	48.88	6	1	96.3445	0.447111	0.397929
1	11.72	125	1054.4	1067.2	1060.8	9.3	5.7	32.2	0.314	30	178.32	29	2	93.5076	0.369305	4.90806
2	11.72	125	1054.4	1067.2	1060.8	9.3	5.7	32.2	0.314	30	178.32	29	2	93.5076	0.369305	3.54902
3	11.72	125	1054.4	1067.2	1060.8	9.3	5.7	32.2	0.314	30	178.32	29	2	93.5076	0.369305	1.88346
4	11.72	125	1054.4	1067.2	1060.8	9.3	5.7	32.2	0.314	30	178.32	29	2	93.5076	0.369305	2.00163
5	11.72	125	1054.4	1067.2	1060.8	9.3	5.7	32.2	0.314	30	178.32	29	2	93.5076	0.369305	0.915877
6	11.72	125	1054.4	1067.2	1060.8	9.3	5.7	32.2	0.314	30	178.32	29	2	93.5076	0.369305	1.44398
7	11.72	125	1054.4	1067.2	1060.8	9.3	5.7	32.2	0.314	30	178.32	29	2	93.5076	0.369305	0.716452
8	11.72	125	1054.4	1067.2	1060.8	9.3	5.7	32.2	0.314	30	178.32	29	2	93.5076	0.369305	0.723838
9	11.72	125	1054.4	1067.2	1060.8	9.3	5.7	32.2	0.314	30	178.32	29	2	93.5076	0.369305	0.812471
10	11.72	125	1054.4	1067.2	1060.8	9.3	5.7	32.2	0.314	30	178.32	29	2	93.5076	0.369305	1.0082
11	11.72	125	1054.4	1067.2	1060.8	9.3	5.7	32.2	0.314	30	178.32	29	2	93.5076	0.369305	1.42552
12	11.72	125	1054.4	1067.2	1060.8	9.3	5.7	32.2	0.314	30	178.32	29	2	93.5076	0.369305	1.18178
1	11.72	125	1075.2	1080.2	1077.7	5	4.2	29.4	0.575	30	93.04	15	1	93.5076	0.498308	6.62251
2	11.72	125	1075.2	1080.2	1077.7	5	4.2	29.4	0.575	30	93.04	15	1	93.5076	0.498308	4.78874
3	11.72	125	1075.2	1080.2	1077.7	5	4.2	29.4	0.575	30	93.04	15	1	93.5076	0.498308	2.54137
4	11.72	125	1075.2	1080.2	1077.7	5	4.2	29.4	0.575	30	93.04	15	1	93.5076	0.498308	2.70083
5	11.72	125	1075.2	1080.2	1077.7	5	4.2	29.4	0.575	30	93.04	15	1	93.5076	0.498308	1.2358
6	11.72	125	1075.2	1080.2	1077.7	5	4.2	29.4	0.575	30	93.04	15	1	93.5076	0.498308	1.94838
7	11.72	125	1075.2	1080.2	1077.7	5	4.2	29.4	0.575	30	93.04	15	1	93.5076	0.498308	0.966718
8	11.72	125	1075.2	1080.2	1077.7	5	4.2	29.4	0.575	30	93.04	15	1	93.5076	0.498308	0.976684
9	11.72	125	1075.2	1080.2	1077.7	5	4.2	29.4	0.575	30	93.04	15	1	93.5076	0.498308	1.09628
10	11.72	125	1075.2	1080.2	1077.7	5	4.2	29.4	0.575	30	93.04	15	1	93.5076	0.498308	1.36038
11	11.72	125	1075.2	1080.2	1077.7	5	4.2	29.4	0.575	30	93.04	15	1	93.5076	0.498308	1.92347
12	11.72	125	1075.2	1080.2	1077.7	5	4.2	29.4	0.575	30	93.04	15	1	93.5076	0.498308	1.59459
1	9.45	175	901.9	915.6	908.75	9.1	5.5	30.1	0.42	32	223.34	37	2	0	0.972222	5.34722
2	9.45	175	901.9	915.6	908.75	9.1	5.5	30.1	0.42	32	223.34	37	2	0	0.972222	4.06389
3	9.45	175	901.9	915.6	908.75	9.1	5.5	30.1	0.42	32	223.34	37	2	0	0.972222	2.29444
4	9.45	175	901.9	915.6	908.75	9.1	5.5	30.1	0.42	32	223.34	37	2	0	0.972222	3.02361
5	9.45	175	901.9	915.6	908.75	9.1	5.5	30.1	0.42	32	223.34	37	2	0	0.972222	2.68333
6	9.45	175	901.9	915.6	908.75	9.1	5.5	30.1	0.42	32	223.34	37	2	0	0.972222	2.35278
1	9.2	175	874.9	880.5	877.7	5.6	4.3	31.5	1.134	30	115.04	19	1	91.9488	0.443513	0.585437
2	9.2	175	874.9	880.5	877.7	5.6	4.3	31.5	1.134	30	115.04	19	1	91.9488	0.443513	3.30417
3	9.2	175	874.9	880.5	877.7	5.6	4.3	31.5	1.134	30	115.04	19	1	91.9488	0.443513	2.98041
4	9.2	175	874.9	880.5	877.7	5.6	4.3	31.5	1.134	30	115.04	19	1	91.9488	0.443513	1.88936
5	9.2	175	874.9	880.5	877.7	5.6	4.3	31.5	1.134	30	115.04	19	1	91.9488	0.443513	0.0221756
6	9.2	175	874.9	880.5	877.7	5.6	4.3	31.5	1.134	30	115.04	19	1	91.9488	0.443513	0.133054
1	9.2	175	890.8	898.3	894.55	7.1	5.9	32.5	1.037	38	221.96	37	2	91.9488	0.556487	0.734563
2	9.2	175	890.8	898.3	894.55	7.1	5.9	32.5	1.037	38	221.96	37	2	91.9488	0.556487	4.14583
3	9.2	175	890.8	898.3	894.55	7.1	5.9	32.5	1.037	38	221.96	37	2	91.9488	0.556487	3.73959
4	9.2	175	890.8	898.3	894.55	7.1	5.9	32.5	1.037	38	221.96	37	2	91.9488	0.556487	2.37064
5	9.2	175	890.8	898.3	894.55	7.1	5.9	32.5	1.037	38	221.96	37	2	91.9488	0.556487	0.0278244
6	9.2	175	890.8	898.3	894.55	7.1	5.9	32.5	1.037	38	221.96	37	2	91.9488	0.556487	0.166946
1	9.45	125	966.1	974	970.05	7.9	5.4	31.5	0.734	30	247.88	37	2	92.7579	0.391254	1.10334
2	9.45	125	966.1	974	970.05	7.9	5.4	31.5	0.734	30	247.88	37	2	92.7579	0.391254	5.11369
3	9.45	125	966.1	974	970.05	7.9	5.4	31.5	0.734	30	247.88	37	2	92.7579	0.391254	2.48446
4	9.45	125	966.1	974	970.05	7.9	5.4	31.5	0.734	30	247.88	37	2	92.7579	0.391254	1.73326
5	9.45	125	966.1	974	970.05	7.9	5.4	31.5	0.734	30	247.88	37	2	92.7579	0.391254	1.78412
6	9.45	125	966.1	974	970.05	7.9	5.4	31.5	0.734	30	247.88	37	2	92.7579	0.391254	2.0267
1	10.48	175	888.7	895.6	892.15	6.9	5.3	31.5	1.107	26	91.3	15	1	90.8124	0.53	1.9504
2	10.48	175	888.7	895.6	892.15	6.9	5.3	31.5	1.107	26	91.3	15	1	90.8124	0.53	1.5264
3	10.48	175	888.7	895.6	892.15	6.9	5.3	31.5	1.107	26	91.3	15	1	90.8124	0.53	2.3638
4	10.48	175	888.7	895.6	892.15	6.9	5.3	31.5	1.107	26	91.3	15	1	90.8124	0.53	2.1836
5	10.48	175	888.7	895.6	892.15	6.9	5.3	31.5	1.107	26	91.3	15	1	90.8124	0.53	1.0441
8	10.48	175	888.7	895.6	892.15	6.9	5.3	31.5	1.107	26	91.3	15	1	90.8124	0.53	0.2915
1	10.59	125	1065.2	1072.6	1068.9	7.4	6.1	31.7	0.899	28	66.16	10.5	1	0	1	4.89
2	10.59	125	1065.2	1072.6	1068.9	7.4	6.1	31.7	0.899	28	66.16	10.5	1	0	1	4.19
3	10.59	125	1065.2	1072.6	1068.9	7.4	6.1	31.7	0.899	28	66.16	10.5	1	0	1	2.94
4	10.59	125	1065.2	1072.6	1068.9	7.4	6.1	31.7	0.899	28	66.16	10.5	1	0	1	2.29
5	10.59	125	1065.2	1072.6	1068.9	7.4	6.1	31.7	0.899	28	66.16	10.5	1	0	1	2.91
6	10.59	125	1065.2	1072.6	1068.9	7.4	6.1	31.7	0.899	28	66.16	10.5	1	0	1	3.32
7	10.59	125	1065.2	1072.6	1068.9	7.4	6.1	31.7	0.899	28	66.16	10.5	1	0	1	3.14
8	10.59	125	1065.2	1072.6	1068.9	7.4	6.1	31.7	0.899	28	66.16	10.5	1	0	1	3.15
9	10.59	125	1065.2	1072.6	1068.9	7.4	6.1	31.7	0.899	28	66.16	10.5	1	0	1	2.45
10	10.59	125	1065.2	1072.6	1068.9	7.4	6.1	31.7	0.899	28	66.16	10.5	1	0	1	2.43
11	10.59	125	1065.2	1072.6	1068.9	7.4	6.1	31.7	0.899	28	66.16	10.5	1	0	1	2.72
12	10.59	125	1065.2	1072.6	1068.9	7.4	6.1	31.7	0.899	28	66.16	10.5	1	0	1	2.24
1	10.23	125	1109.4	1121.8	1115.6	10.7	7.6	31.5	0.64	32	110.82	17	2	0	0.968519	4.04841
2	10.23	125	1109.4	1121.8	1115.6	10.7	7.6	31.5	0.64	32	110.82	17	2	0	0.968519	3.12832
3	10.23	125	1109.4	1121.8	1115.6	10.7	7.6	31.5	0.64	32	110.82	17	2	0	0.968519	2.63437
4	10.23	125	1109.4	1121.8	1115.6	10.7	7.6	31.5	0.64	32	110.82	17	2	0	0.968519	2.21791
5	10.23	125	1109.4	1121.8	1115.6	10.7	7.6	31.5	0.64	32	110.82	17	2	0	0.968519	1.86924
6	10.23	125	1109.4	1121.8	1115.6	10.7	7.6	31.5	0.64	32	110.82	17	2	0	0.968519	2.34382
7	10.23	125	1109.4	1121.8	1115.6	10.7	7.6	31.5	0.64	32	110.82	17	2	0	0.968519	1.51089
8	10.23	125	1109.4	1121.8	1115.6	10.7	7.6	31.5	0.64	32	110.82	17	2	0	0.968519	1.52058
9	10.23	125	1109.4	1121.8	1115.6	10.7	7.6	31.5	0.64	32	110.82	17	2	0	0.968519	1.41404
10	10.23	125	1109.4	1121.8	1115.6	10.7	7.6	31.5	0.64	32	110.82	17	2	0	0.968519	1.68522
11	10.23	125	1109.4	1121.8	1115.6	10.7	7.6	31.5	0.64	32	110.82	17	2	0	0.968519	0.968519
12	10.23	125	1109.4	1121.8	1115.6	10.7	7.6	31.5	0.64	32	110.82	17	2	0	0.968519	1.52058
1	9.27	125	908.6	914.3	911.45	4.6	2.9	31.8	0.477	24	60.9	9.5	1	94.937	0.370888	1.75801
2	9.27	125	908.6	914.3	911.45	4.6	2.9	31.8	0.477	24	60.9	9.5	1	94.937	0.370888	1.46872
3	9.27	125	908.6	914.3	911.45	4.6	2.9	31.8	0.477	24	60.9	9.5	1	94.937	0.370888	0.804826
4	9.27	125	908.6	914.3	911.45	4.6	2.9	31.8	0.477	24	60.9	9.5	1	94.937	0.370888	0.522952
5	9.27	125	908.6	914.3	911.45	4.6	2.9	31.8	0.477	24	60.9	9.5	1	94.937	0.370888	0.166899
6	9.27	125	908.6	914.3	911.45	4.6	2.9	31.8	0.477	24	60.9	9.5	1	94.937	0.370888	0.348634
7	9.27	125	908.6	914.3	911.45	4.6	2.9	31.8	0.477	24	60.9	9.5	1	94.937	0.370888	0.0667598
8	9.27	125	908.6	914.3	911.45	4.6	2.9	31.8	0.477	24	60.9	9.5	1	94.937	0.370888	0.0445065
9	9.27	125	908.6	914.3	911.45	4.6	2.9	31.8	0.477	24	60.9	9.5	1	94.937	0.370888	0.0370888
1	9.27	125	928.5	934.5	931.5	4.4	3.2	31.5	0.602	27	215.32	35	2	94.937	0.516503	2.44822
2	9.27	125	928.5	934.5	931.5	4.4	3.2	31.5	0.602	27	215.32	35	2	94.937	0.516503	2.04535
3	9.27	125	928.5	934.5	931.5	4.4	3.2	31.5	0.602	27	215.32	35	2	94.937	0.516503	1.12081
4	9.27	125	928.5	934.5	931.5	4.4	3.2	31.5	0.602	27	215.32	35	2	94.937	0.516503	0.728269
5	9.27	125	928.5	934.5	931.5	4.4	3.2	31.5	0.602	27	215.32	35	2	94.937	0.516503	0.232426
6	9.27	125	928.5	934.5	931.5	4.4	3.2	31.5	0.602	27	215.32	35	2	94.937	0.516503	0.485513
7	9.27	125	928.5	934.5	931.5	4.4	3.2	31.5	0.602	27	215.32	35	2	94.937	0.516503	0.0929705
8	9.27	125	928.5	934.5	931.5	4.4	3.2	31.5	0.602	27	215.32	35	2	94.937	0.516503	0.0619803
9	9.27	125	928.5	934.5	931.5	4.4	3.2	31.5	0.602	27	215.32	35	2	94.937	0.516503	0.0516503
1	7.37	175	932.6	937.4	935	4.8	3.8	29.6	0.7	21	76.66	11.5	1	93.7429	0.565957	0.650851
2	7.37	175	932.6	937.4	935	4.8	3.8	29.6	0.7	21	76.66	11.5	1	93.7429	0.565957	1.3866
3	7.37	175	932.6	937.4	935	4.8	3.8	29.6	0.7	21	76.66	11.5	1	93.7429	0.565957	2.42796
4	7.37	175	932.6	937.4	935	4.8	3.8	29.6	0.7	21	76.66	11.5	1	93.7429	0.565957	8.48936
5	7.37	175	932.6	937.4	935	4.8	3.8	29.6	0.7	21	76.66	11.5	1	93.7429	0.565957	4.77102
6	7.37	175	932.6	937.4	935	4.8	3.8	29.6	0.7	21	76.66	11.5	1	93.7429	0.565957	3.83153
7	7.37	175	932.6	937.4	935	4.8	3.8	29.6	0.7	21	76.66	11.5	1	93.7429	0.565957	4.55596
8	7.37	175	932.6	937.4	935	4.8	3.8	29.6	0.7	21	76.66	11.5	1	93.7429	0.565957	4.3126
9	7.37	175	932.6	937.4	935	4.8	3.8	29.6	0.7	21	76.66	11.5	1	93.7429	0.565957	3.2203
1	9.73	175	980.8	987	983.9	4.6	2.6	31.6	0.71	31	149.8	23	2	92.4881	0.536425	1.58245
2	9.73	175	980.8	987	983.9	4.6	2.6	31.6	0.71	31	149.8	23	2	92.4881	0.536425	0.97093
3	9.73	175	980.8	987	983.9	4.6	2.6	31.6	0.71	31	149.8	23	2	92.4881	0.536425	0.17702
4	9.73	175	980.8	987	983.9	4.6	2.6	31.6	0.71	31	149.8	23	2	92.4881	0.536425	0.064371
9	9.73	175	980.8	987	983.9	4.6	2.6	31.6	0.71	31	149.8	23	2	92.4881	0.536425	0.0375498
1	11.93	125	1059.6	1065.6	1062.6	6	3.7	30.5	0.745	30	71.42	11.5	1	96.4358	0.55407	0.842187
2	11.93	125	1059.6	1065.6	1062.6	6	3.7	30.5	0.745	30	71.42	11.5	1	96.4358	0.55407	0.853268
3	11.93	125	1059.6	1065.6	1062.6	6	3.7	30.5	0.745	30	71.42	11.5	1	96.4358	0.55407	0.376768
4	11.93	125	1059.6	1065.6	1062.6	6	3.7	30.5	0.745	30	71.42	11.5	1	96.4358	0.55407	0.132977
5	11.93	125	1059.6	1065.6	1062.6	6	3.7	30.5	0.745	30	71.42	11.5	1	96.4358	0.55407	0.265954
1	11.93	125	1085.6	1090.9	1088.25	4.5	2.7	29.2	0.567	25	71.42	11.5	1	96.4358	0.307719	0.467732
2	11.93	125	1085.6	1090.9	1088.25	4.5	2.7	29.2	0.567	25	71.42	11.5	1	96.4358	0.307719	0.473887
3	11.93	125	1085.6	1090.9	1088.25	4.5	2.7	29.2	0.567	25	71.42	11.5	1	96.4358	0.307719	0.209249
4	11.93	125	1085.6	1090.9	1088.25	4.5	2.7	29.2	0.567	25	71.42	11.5	1	96.4358	0.307719	0.0738525
5	11.93	125	1085.6	1090.9	1088.25	4.5	2.7	29.2	0.567	25	71.42	11.5	1	96.4358	0.307719	0.147705
1	10.23	125	1119	1124.3	1121.65	5.3	4.6	31.2	1.061	27	58.44	8	1	88.0939	0.778716	2.53861
2	10.23	125	1119	1124.3	1121.65	5.3	4.6	31.2	1.061	27	58.44	8	1	88.0939	0.778716	1.30046
3	10.23	125	1119	1124.3	1121.65	5.3	4.6	31.2	1.061	27	58.44	8	1	88.0939	0.778716	0.513952
4	10.23	125	1119	1124.3	1121.65	5.3	4.6	31.2	1.061	27	58.44	8	1	88.0939	0.778716	1.41726
5	10.23	125	1119	1124.3	1121.65	5.3	4.6	31.2	1.061	27	58.44	8	1	88.0939	0.778716	0.303699
1	10.97	125	1034.3	1045.2	1039.75	9.4	4.4	31.3	0.641	40	227.43	37	2	93.2549	0.439198	0.983804
2	10.97	125	1034.3	1045.2	1039.75	9.4	4.4	31.3	0.641	40	227.43	37	2	93.2549	0.439198	0.329399
3	10.97	125	1034.3	1045.2	1039.75	9.4	4.4	31.3	0.641	40	227.43	37	2	93.2549	0.439198	0.0263519
4	10.97	125	1034.3	1045.2	1039.75	9.4	4.4	31.3	0.641	40	227.43	37	2	93.2549	0.439198	0.0219599
5	10.97	125	1034.3	1045.2	1039.75	9.4	4.4	31.3	0.641	40	227.43	37	2	93.2549	0.439198	0.114192
6	10.97	125	1034.3	1045.2	1039.75	9.4	4.4	31.3	0.641	40	227.43	37	2	93.2549	0.439198	0.333791
7	10.97	125	1034.3	1045.2	1039.75	9.4	4.4	31.3	0.641	40	227.43	37	2	93.2549	0.439198	0.311831
8	10.97	125	1034.3	1045.2	1039.75	9.4	4.4	31.3	0.641	40	227.43	37	2	93.2549	0.439198	0.00439198
1	9.49	125	1123.2	1133.4	1128.3	9	5.6	31.7	0.83	27	230.56	37	2	90.6564	1	3.56
2	9.49	125	1123.2	1133.4	1128.3	9	5.6	31.7	0.83	27	230.56	37	2	90.6564	1	3.28
3	9.49	125	1123.2	1133.4	1128.3	9	5.6	31.7	0.83	27	230.56	37	2	90.6564	1	2.97
4	9.49	125	1123.2	1133.4	1128.3	9	5.6	31.7	0.83	27	230.56	37	2	90.6564	1	1.48
5	9.49	125	1123.2	1133.4	1128.3	9	5.6	31.7	0.83	27	230.56	37	2	90.6564	1	2.24
6	9.49	125	1123.2	1133.4	1128.3	9	5.6	31.7	0.83	27	230.56	37	2	90.6564	1	1.88
7	9.49	125	1123.2	1133.4	1128.3	9	5.6	31.7	0.83	27	230.56	37	2	90.6564	1	0.5
8	9.49	125	1123.2	1133.4	1128.3	9	5.6	31.7	0.83	27	230.56	37	2	90.6564	1	0.49
9	9.49	125	1123.2	1133.4	1128.3	9	5.6	31.7	0.83	27	230.56	37	2	90.6564	1	0.31
1	9.4	125	1102.4	1105.9	1104.15	3.5	3	31.2	0.642	29	62.16	10	1	93.144	0.179812	0.42076
2	9.4	125	1102.4	1105.9	1104.15	3.5	3	31.2	0.642	29	62.16	10	1	93.144	0.179812	0.298488
3	9.4	125	1102.4	1105.9	1104.15	3.5	3	31.2	0.642	29	62.16	10	1	93.144	0.179812	0.300286
4	9.4	125	1102.4	1105.9	1104.15	3.5	3	31.2	0.642	29	62.16	10	1	93.144	0.179812	0.222967
5	9.4	125	1102.4	1105.9	1104.15	3.5	3	31.2	0.642	29	62.16	10	1	93.144	0.179812	0.075521
6	9.4	125	1102.4	1105.9	1104.15	3.5	3	31.2	0.642	29	62.16	10	1	93.144	0.179812	0.111483
1	9.4	125	1112.2	1120.7	1116.45	8.5	5.3	30.9	0.8	32	62.56	10	1	93.144	0.395847	0.926283
2	9.4	125	1112.2	1120.7	1116.45	8.5	5.3	30.9	0.8	32	62.56	10	1	93.144	0.395847	0.657107
3	9.4	125	1112.2	1120.7	1116.45	8.5	5.3	30.9	0.8	32	62.56	10	1	93.144	0.395847	0.661065
4	9.4	125	1112.2	1120.7	1116.45	8.5	5.3	30.9	0.8	32	62.56	10	1	93.144	0.395847	0.490851
5	9.4	125	1112.2	1120.7	1116.45	8.5	5.3	30.9	0.8	32	62.56	10	1	93.144	0.395847	0.166256
6	9.4	125	1112.2	1120.7	1116.45	8.5	5.3	30.9	0.8	32	62.56	10	1	93.144	0.395847	0.245425
1	10.42	125	1098.4	1102.7	1100.55	4.3	3.9	32.9	0.672	29	53.76	8.5	1	94.5148	0.478615	0.37332
2	10.42	125	1098.4	1102.7	1100.55	4.3	3.9	32.9	0.672	29	53.76	8.5	1	94.5148	0.478615	0.516904
3	10.42	125	1098.4	1102.7	1100.55	4.3	3.9	32.9	0.672	29	53.76	8.5	1	94.5148	0.478615	0.488187
4	10.42	125	1098.4	1102.7	1100.55	4.3	3.9	32.9	0.672	29	53.76	8.5	1	94.5148	0.478615	0.363747
5	10.42	125	1098.4	1102.7	1100.55	4.3	3.9	32.9	0.672	29	53.76	8.5	1	94.5148	0.478615	0.52169
6	10.42	125	1098.4	1102.7	1100.55	4.3	3.9	32.9	0.672	29	53.76	8.5	1	94.5148	0.478615	0.306314
7	10.42	125	1098.4	1102.7	1100.55	4.3	3.9	32.9	0.672	29	53.76	8.5	1	94.5148	0.478615	0.689206
8	10.42	125	1098.4	1102.7	1100.55	4.3	3.9	32.9	0.672	29	53.76	8.5	1	94.5148	0.478615	0.655703
9	10.42	125	1098.4	1102.7	1100.55	4.3	3.9	32.9	0.672	29	53.76	8.5	1	94.5148	0.478615	0.732281
10	10.42	125	1098.4	1102.7	1100.55	4.3	3.9	32.9	0.672	29	53.76	8.5	1	94.5148	0.478615	1.59857
11	10.42	125	1098.4	1102.7	1100.55	4.3	3.9	32.9	0.672	29	53.76	8.5	1	94.5148	0.478615	0.784929
12	10.42	125	1098.4	1102.7	1100.55	4.3	3.9	32.9	0.672	29	53.76	8.5	1	94.5148	0.478615	0.746639
1	10.42	125	1114	1122.5	1118.25	8.5	3.5	31.5	0.556	32	91.84	15	1	94.5148	0.355382	0.277198
2	10.42	125	1114	1122.5	1118.25	8.5	3.5	31.5	0.556	32	91.84	15	1	94.5148	0.355382	0.383812
3	10.42	125	1114	1122.5	1118.25	8.5	3.5	31.5	0.556	32	91.84	15	1	94.5148	0.355382	0.362489
4	10.42	125	1114	1122.5	1118.25	8.5	3.5	31.5	0.556	32	91.84	15	1	94.5148	0.355382	0.27009
5	10.42	125	1114	1122.5	1118.25	8.5	3.5	31.5	0.556	32	91.84	15	1	94.5148	0.355382	0.387366
6	10.42	125	1114	1122.5	1118.25	8.5	3.5	31.5	0.556	32	91.84	15	1	94.5148	0.355382	0.227444
7	10.42	125	1114	1122.5	1118.25	8.5	3.5	31.5	0.556	32	91.84	15	1	94.5148	0.355382	0.51175
8	10.42	125	1114	1122.5	1118.25	8.5	3.5	31.5	0.556	32	91.84	15	1	94.5148	0.355382	0.486873
9	10.42	125	1114	1122.5	1118.25	8.5	3.5	31.5	0.556	32	91.84	15	1	94.5148	0.355382	0.543734
10	10.42	125	1114	1122.5	1118.25	8.5	3.5	31.5	0.556	32	91.84	15	1	94.5148	0.355382	1.18698
11	10.42	125	1114	1122.5	1118.25	8.5	3.5	31.5	0.556	32	91.84	15	1	94.5148	0.355382	0.582826
12	10.42	125	1114	1122.5	1118.25	8.5	3.5	31.5	0.556	32	91.84	15	1	94.5148	0.355382	0.554396
1	10.42	125	1189.9	1194.6	1192.25	4.7	2.1	31.7	0.424	29	80.28	11.5	1	94.5148	0.162606	0.126833
2	10.42	125	1189.9	1194.6	1192.25	4.7	2.1	31.7	0.424	29	80.28	11.5	1	94.5148	0.162606	0.175615
3	10.42	125	1189.9	1194.6	1192.25	4.7	2.1	31.7	0.424	29	80.28	11.5	1	94.5148	0.162606	0.165859
4	10.42	125	1189.9	1194.6	1192.25	4.7	2.1	31.7	0.424	29	80.28	11.5	1	94.5148	0.162606	0.123581
5	10.42	125	1189.9	1194.6	1192.25	4.7	2.1	31.7	0.424	29	80.28	11.5	1	94.5148	0.162606	0.177241
6	10.42	125	1189.9	1194.6	1192.25	4.7	2.1	31.7	0.424	29	80.28	11.5	1	94.5148	0.162606	0.104068
7	10.42	125	1189.9	1194.6	1192.25	4.7	2.1	31.7	0.424	29	80.28	11.5	1	94.5148	0.162606	0.234153
8	10.42	125	1189.9	1194.6	1192.25	4.7	2.1	31.7	0.424	29	80.28	11.5	1	94.5148	0.162606	0.222771
9	10.42	125	1189.9	1194.6	1192.25	4.7	2.1	31.7	0.424	29	80.28	11.5	1	94.5148	0.162606	0.248788
10	10.42	125	1189.9	1194.6	1192.25	4.7	2.1	31.7	0.424	29	80.28	11.5	1	94.5148	0.162606	0.543105
11	10.42	125	1189.9	1194.6	1192.25	4.7	2.1	31.7	0.424	29	80.28	11.5	1	94.5148	0.162606	0.266674
12	10.42	125	1189.9	1194.6	1192.25	4.7	2.1	31.7	0.424	29	80.28	11.5	1	94.5148	0.162606	0.253666
1	9.82	175	911.4	919	915.2	7.2	5.1	28.7	0.93	26	94.92	15	1	91.8544	0.570387	0.536164
2	9.82	175	911.4	919	915.2	7.2	5.1	28.7	0.93	26	94.92	15	1	91.8544	0.570387	1.28337
3	9.82	175	911.4	919	915.2	7.2	5.1	28.7	0.93	26	94.92	15	1	91.8544	0.570387	0.832766
4	9.82	175	911.4	919	915.2	7.2	5.1	28.7	0.93	26	94.92	15	1	91.8544	0.570387	1.0267
5	9.82	175	911.4	919	915.2	7.2	5.1	28.7	0.93	26	94.92	15	1	91.8544	0.570387	0.439198
6	9.82	175	911.4	919	915.2	7.2	5.1	28.7	0.93	26	94.92	15	1	91.8544	0.570387	0.63313
7	9.82	175	911.4	919	915.2	7.2	5.1	28.7	0.93	26	94.92	15	1	91.8544	0.570387	0.308009
8	9.82	175	911.4	919	915.2	7.2	5.1	28.7	0.93	26	94.92	15	1	91.8544	0.570387	0.536164
9	9.82	175	911.4	919	915.2	7.2	5.1	28.7	0.93	26	94.92	15	1	91.8544	0.570387	0.70728
10	9.82	175	911.4	919	915.2	7.2	5.1	28.7	0.93	26	94.92	15	1	91.8544	0.570387	0.342232
11	9.82	175	911.4	919	915.2	7.2	5.1	28.7	0.93	26	94.92	15	1	91.8544	0.570387	0.370752
1	7.95	125	1009.2	1017.6	1013.4	7.1	4.8	30.8	0.577	32	112.02	17	2	93.3682	0.519177	7.44499
2	7.95	125	1009.2	1017.6	1013.4	7.1	4.8	30.8	0.577	32	112.02	17	2	93.3682	0.519177	9.4594
3	7.95	125	1009.2	1017.6	1013.4	7.1	4.8	30.8	0.577	32	112.02	17	2	93.3682	0.519177	7.1231
4	7.95	125	1009.2	1017.6	1013.4	7.1	4.8	30.8	0.577	32	112.02	17	2	93.3682	0.519177	6.27165
5	7.95	125	1009.2	1017.6	1013.4	7.1	4.8	30.8	0.577	32	112.02	17	2	93.3682	0.519177	5.6746
6	7.95	125	1009.2	1017.6	1013.4	7.1	4.8	30.8	0.577	32	112.02	17	2	93.3682	0.519177	6.12109
7	7.95	125	1009.2	1017.6	1013.4	7.1	4.8	30.8	0.577	32	112.02	17	2	93.3682	0.519177	6.18859
8	7.95	125	1009.2	1017.6	1013.4	7.1	4.8	30.8	0.577	32	112.02	17	2	93.3682	0.519177	4.47011
9	7.95	125	1009.2	1017.6	1013.4	7.1	4.8	30.8	0.577	32	112.02	17	2	93.3682	0.519177	3.42137
10	7.95	125	1009.2	1017.6	1013.4	7.1	4.8	30.8	0.577	32	112.02	17	2	93.3682	0.519177	2.78798
11	7.95	125	1009.2	1017.6	1013.4	7.1	4.8	30.8	0.577	32	112.02	17	2	93.3682	0.519177	2.5855
12	7.95	125	1009.2	1017.6	1013.4	7.1	4.8	30.8	0.577	32	112.02	17	2	93.3682	0.519177	1.05912
1	7.95	125	989.1	998.7	993.9	9.1	6.5	31.3	0.714	29	141.94	23	2	96.0566	0.832063	9.36903
2	7.95	125	989.1	998.7	993.9	9.1	6.5	31.3	0.714	29	141.94	23	2	96.0566	0.832063	6.73971
3	7.95	125	989.1	998.7	993.9	9.1	6.5	31.3	0.714	29	141.94	23	2	96.0566	0.832063	7.41368
4	7.95	125	989.1	998.7	993.9	9.1	6.5	31.3	0.714	29	141.94	23	2	96.0566	0.832063	5.70795
5	7.95	125	989.1	998.7	993.9	9.1	6.5	31.3	0.714	29	141.94	23	2	96.0566	0.832063	8.78659
6	7.95	125	989.1	998.7	993.9	9.1	6.5	31.3	0.714	29	141.94	23	2	96.0566	0.832063	5.11719
7	7.95	125	989.1	998.7	993.9	9.1	6.5	31.3	0.714	29	141.94	23	2	96.0566	0.832063	9.18598
8	7.95	125	989.1	998.7	993.9	9.1	6.5	31.3	0.714	29	141.94	23	2	96.0566	0.832063	7.51353
9	7.95	125	989.1	998.7	993.9	9.1	6.5	31.3	0.714	29	141.94	23	2	96.0566	0.832063	5.10055
10	7.95	125	989.1	998.7	993.9	9.1	6.5	31.3	0.714	29	141.94	23	2	96.0566	0.832063	3.91902
11	7.95	125	989.1	998.7	993.9	9.1	6.5	31.3	0.714	29	141.94	23	2	96.0566	0.832063	4.40162
12	7.95	125	989.1	998.7	993.9	9.1	6.5	31.3	0.714	29	141.94	23	2	96.0566	0.832063	2.71253
1	7.95	125	870	877.1	873.55	6.9	3.9	29	0.323	32	141.24	23	2	92.5987	0.282286	1.56386
2	7.95	125	870	877.1	873.55	6.9	3.9	29	0.323	32	141.24	23	2	92.5987	0.282286	1.20818
3	7.95	125	870	877.1	873.55	6.9	3.9	29	0.323	32	141.24	23	2	92.5987	0.282286	1.51305
4	7.95	125	870	877.1	873.55	6.9	3.9	29	0.323	32	141.24	23	2	92.5987	0.282286	1.94495
5	7.95	125	870	877.1	873.55	6.9	3.9	29	0.323	32	141.24	23	2	92.5987	0.282286	2.25264
6	7.95	125	870	877.1	873.55	6.9	3.9	29	0.323	32	141.24	23	2	92.5987	0.282286	2.95553
7	7.95	125	870	877.1	873.55	6.9	3.9	29	0.323	32	141.24	23	2	92.5987	0.282286	3.15313
8	7.95	125	870	877.1	873.55	6.9	3.9	29	0.323	32	141.24	23	2	92.5987	0.282286	2.35709
9	7.95	125	870	877.1	873.55	6.9	3.9	29	0.323	32	141.24	23	2	92.5987	0.282286	1.14608
10	7.95	125	870	877.1	873.55	6.9	3.9	29	0.323	32	141.24	23	2	92.5987	0.282286	1.37191
11	7.95	125	870	877.1	873.55	6.9	3.9	29	0.323	32	141.24	23	2	92.5987	0.282286	1.0501
12	7.95	125	870	877.1	873.55	6.9	3.9	29	0.323	32	141.24	23	2	92.5987	0.282286	0.914606
1	7.37	175	890.5	898	894.25	7	5.2	29.3	0.93	20	142.38	23.5	1	91.0157	0.726235	0.413954
2	7.37	175	890.5	898	894.25	7	5.2	29.3	0.93	20	142.38	23.5	1	91.0157	0.726235	0.660874
3	7.37	175	890.5	898	894.25	7	5.2	29.3	0.93	20	142.38	23.5	1	91.0157	0.726235	0.893269
4	7.37	175	890.5	898	894.25	7	5.2	29.3	0.93	20	142.38	23.5	1	91.0157	0.726235	1.41616
5	7.37	175	890.5	898	894.25	7	5.2	29.3	0.93	20	142.38	23.5	1	91.0157	0.726235	1.14745
6	7.37	175	890.5	898	894.25	7	5.2	29.3	0.93	20	142.38	23.5	1	91.0157	0.726235	1.61224
7	7.37	175	890.5	898	894.25	7	5.2	29.3	0.93	20	142.38	23.5	1	91.0157	0.726235	1.11114
8	7.37	175	890.5	898	894.25	7	5.2	29.3	0.93	20	142.38	23.5	1	91.0157	0.726235	1.3508
9	7.37	175	890.5	898	894.25	7	5.2	29.3	0.93	20	142.38	23.5	1	91.0157	0.726235	0.922319
10	7.37	175	890.5	898	894.25	7	5.2	29.3	0.93	20	142.38	23.5	1	91.0157	0.726235	2.12787
11	7.37	175	890.5	898	894.25	7	5.2	29.3	0.93	20	142.38	23.5	1	91.0157	0.726235	1.03125
12	7.37	175	890.5	898	894.25	7	5.2	29.3	0.93	20	142.38	23.5	1	91.0157	0.726235	1.11114
1	8.67	175	885.1	887.8	886.45	2.7	2.3	31.6	0.767	18	70	11.5	1	88.4421	0.242966	0.578258
2	8.67	175	885.1	887.8	886.45	2.7	2.3	31.6	0.767	18	70	11.5	1	88.4421	0.242966	1.34117
3	8.67	175	885.1	887.8	886.45	2.7	2.3	31.6	0.767	18	70	11.5	1	88.4421	0.242966	1.50882
4	8.67	175	885.1	887.8	886.45	2.7	2.3	31.6	0.767	18	70	11.5	1	88.4421	0.242966	1.28043
5	8.67	175	885.1	887.8	886.45	2.7	2.3	31.6	0.767	18	70	11.5	1	88.4421	0.242966	1.41406
6	8.67	175	885.1	887.8	886.45	2.7	2.3	31.6	0.767	18	70	11.5	1	88.4421	0.242966	1.01317
7	8.67	175	885.1	887.8	886.45	2.7	2.3	31.6	0.767	18	70	11.5	1	88.4421	0.242966	0.823653
8	8.67	175	885.1	887.8	886.45	2.7	2.3	31.6	0.767	18	70	11.5	1	88.4421	0.242966	0.823653
9	8.67	175	885.1	887.8	886.45	2.7	2.3	31.6	0.767	18	70	11.5	1	88.4421	0.242966	0.925699
10	8.67	175	885.1	887.8	886.45	2.7	2.3	31.6	0.767	18	70	11.5	1	88.4421	0.242966	0.396034
1	8.01	125	989.5	995.6	992.55	6.1	5.3	29.4	1.003	24	91.48	15	1	0	0.576499	1.75832
2	8.01	125	989.5	995.6	992.55	6.1	5.3	29.4	1.003	24	91.48	15	1	0	0.576499	1.67761
3	8.01	125	989.5	995.6	992.55	6.1	5.3	29.4	1.003	24	91.48	15	1	0	0.576499	1.18182
4	8.01	125	989.5	995.6	992.55	6.1	5.3	29.4	1.003	24	91.48	15	1	0	0.576499	1.01464
5	8.01	125	989.5	995.6	992.55	6.1	5.3	29.4	1.003	24	91.48	15	1	0	0.576499	1.1357
6	8.01	125	989.5	995.6	992.55	6.1	5.3	29.4	1.003	24	91.48	15	1	0	0.576499	1.46431
7	8.01	125	989.5	995.6	992.55	6.1	5.3	29.4	1.003	24	91.48	15	1	0	0.576499	1.90821
8	8.01	125	989.5	995.6	992.55	6.1	5.3	29.4	1.003	24	91.48	15	1	0	0.576499	1.50466
9	8.01	125	989.5	995.6	992.55	6.1	5.3	29.4	1.003	24	91.48	15	1	0	0.576499	2.08116
10	8.01	125	989.5	995.6	992.55	6.1	5.3	29.4	1.003	24	91.48	15	1	0	0.576499	1.76409
11	8.01	125	989.5	995.6	992.55	6.1	5.3	29.4	1.003	24	91.48	15	1	0	0.576499	2.35212
12	8.01	125	989.5	995.6	992.55	6.1	5.3	29.4	1.003	24	91.48	15	1	0	0.576499	3.23416
1	7.95	125	872.6	880.3	876.45	5.8	3.6	30.7	0.519	31	108.71	17	2	90.014	0.447907	5.993
2	7.95	125	872.6	880.3	876.45	5.8	3.6	30.7	0.519	31	108.71	17	2	90.014	0.447907	4.98521
3	7.95	125	872.6	880.3	876.45	5.8	3.6	30.7	0.519	31	108.71	17	2	90.014	0.447907	4.12075
4	7.95	125	872.6	880.3	876.45	5.8	3.6	30.7	0.519	31	108.71	17	2	90.014	0.447907	1.99319
5	7.95	125	872.6	880.3	876.45	5.8	3.6	30.7	0.519	31	108.71	17	2	90.014	0.447907	1.04362
6	7.95	125	872.6	880.3	876.45	5.8	3.6	30.7	0.519	31	108.71	17	2	90.014	0.447907	1.22727
7	7.95	125	872.6	880.3	876.45	5.8	3.6	30.7	0.519	31	108.71	17	2	90.014	0.447907	1.84538
8	7.95	125	872.6	880.3	876.45	5.8	3.6	30.7	0.519	31	108.71	17	2	90.014	0.447907	1.82746
9	7.95	125	872.6	880.3	876.45	5.8	3.6	30.7	0.519	31	108.71	17	2	90.014	0.447907	1.8185
10	7.95	125	872.6	880.3	876.45	5.8	3.6	30.7	0.519	31	108.71	17	2	90.014	0.447907	1.68413
11	7.95	125	872.6	880.3	876.45	5.8	3.6	30.7	0.519	31	108.71	17	2	90.014	0.447907	1.26758
1	8.92	175	889	897.1	893.05	8.1	5.9	32	1.1	28	139.72	23.5	1	94.8249	0.778289	4.07045
2	8.92	175	889	897.1	893.05	8.1	5.9	32	1.1	28	139.72	23.5	1	94.8249	0.778289	4.16385
3	8.92	175	889	897.1	893.05	8.1	5.9	32	1.1	28	139.72	23.5	1	94.8249	0.778289	5.07445
4	8.92	175	889	897.1	893.05	8.1	5.9	32	1.1	28	139.72	23.5	1	94.8249	0.778289	7.35484
5	8.92	175	889	897.1	893.05	8.1	5.9	32	1.1	28	139.72	23.5	1	94.8249	0.778289	8.8725
6	8.92	175	889	897.1	893.05	8.1	5.9	32	1.1	28	139.72	23.5	1	94.8249	0.778289	8.01638
7	8.92	175	889	897.1	893.05	8.1	5.9	32	1.1	28	139.72	23.5	1	94.8249	0.778289	7.40932
8	8.92	175	889	897.1	893.05	8.1	5.9	32	1.1	28	139.72	23.5	1	94.8249	0.778289	8.72462
9	8.92	175	889	897.1	893.05	8.1	5.9	32	1.1	28	139.72	23.5	1	94.8249	0.778289	7.67393
10	8.92	175	889	897.1	893.05	8.1	5.9	32	1.1	28	139.72	23.5	1	94.8249	0.778289	5.10558
11	8.92	175	889	897.1	893.05	8.1	5.9	32	1.1	28	139.72	23.5	1	94.8249	0.778289	3.9148
1	9.19	125	968.8	972.9	970.85	4.1	3.4	31	0.994	19	91.3	15	1	96.359	0.842079	5.11142
2	9.19	125	968.8	972.9	970.85	4.1	3.4	31	0.994	19	91.3	15	1	96.359	0.842079	3.56199
3	9.19	125	968.8	972.9	970.85	4.1	3.4	31	0.994	19	91.3	15	1	96.359	0.842079	2.28203
4	9.19	125	968.8	972.9	970.85	4.1	3.4	31	0.994	19	91.3	15	1	96.359	0.842079	2.39993
5	9.19	125	968.8	972.9	970.85	4.1	3.4	31	0.994	19	91.3	15	1	96.359	0.842079	2.29045
6	9.19	125	968.8	972.9	970.85	4.1	3.4	31	0.994	19	91.3	15	1	96.359	0.842079	2.70307
7	9.19	125	968.8	972.9	970.85	4.1	3.4	31	0.994	19	91.3	15	1	96.359	0.842079	2.53466
8	9.19	125	968.8	972.9	970.85	4.1	3.4	31	0.994	19	91.3	15	1	96.359	0.842079	1.60837
9	9.19	125	968.8	972.9	970.85	4.1	3.4	31	0.994	19	91.3	15	1	96.359	0.842079	0.833658
10	9.19	125	968.8	972.9	970.85	4.1	3.4	31	0.994	19	91.3	15	1	96.359	0.842079	1.13681
11	9.19	125	968.8	972.9	970.85	4.1	3.4	31	0.994	19	91.3	15	1	96.359	0.842079	1.61679
12	9.19	125	968.8	972.9	970.85	4.1	3.4	31	0.994	19	91.3	15	1	96.359	0.842079	0.892604
1	8.29	125	870.1	876.7	873.4	6.2	4.7	31.9	0.881	28	146.56	23	2	81.5697	0.661855	1.5686
2	8.29	125	870.1	876.7	873.4	6.2	4.7	31.9	0.881	28	146.56	23	2	81.5697	0.661855	2.53491
3	8.29	125	870.1	876.7	873.4	6.2	4.7	31.9	0.881	28	146.56	23	2	81.5697	0.661855	1.93262
4	8.29	125	870.1	876.7	873.4	6.2	4.7	31.9	0.881	28	146.56	23	2	81.5697	0.661855	3.1041
5	8.29	125	870.1	876.7	873.4	6.2	4.7	31.9	0.881	28	146.56	23	2	81.5697	0.661855	3.81229
6	8.29	125	870.1	876.7	873.4	6.2	4.7	31.9	0.881	28	146.56	23	2	81.5697	0.661855	0.225031
1	8.29	125	897.7	906.5	902.1	7.8	7.2	31.1	0.674	28	111.6	17	2	90.2071	0.768249	1.3598
2	8.29	125	897.7	906.5	902.1	7.8	7.2	31.1	0.674	28	111.6	17	2	90.2071	0.768249	2.14342
3	8.29	125	897.7	906.5	902.1	7.8	7.2	31.1	0.674	28	111.6	17	2	90.2071	0.768249	2.88093
4	8.29	125	897.7	906.5	902.1	7.8	7.2	31.1	0.674	28	111.6	17	2	90.2071	0.768249	3.79515
5	8.29	125	897.7	906.5	902.1	7.8	7.2	31.1	0.674	28	111.6	17	2	90.2071	0.768249	1.72088
6	8.29	125	897.7	906.5	902.1	7.8	7.2	31.1	0.674	28	111.6	17	2	90.2071	0.768249	0.829709
8	8.29	125	897.7	906.5	902.1	7.8	7.2	31.1	0.674	28	111.6	17	2	90.2071	0.768249	0.291935
9	8.29	125	897.7	906.5	902.1	7.8	7.2	31.1	0.674	28	111.6	17	2	90.2071	0.768249	0.330347
1	7.95	125	880.8	889	884.9	6.8	2.6	31.3	0.65	27	128.76	23	2	89.3354	0.39382	3.08755
2	7.95	125	880.8	889	884.9	6.8	2.6	31.3	0.65	27	128.76	23	2	89.3354	0.39382	2.94577
3	7.95	125	880.8	889	884.9	6.8	2.6	31.3	0.65	27	128.76	23	2	89.3354	0.39382	2.03999
4	7.95	125	880.8	889	884.9	6.8	2.6	31.3	0.65	27	128.76	23	2	89.3354	0.39382	3.04029
5	7.95	125	880.8	889	884.9	6.8	2.6	31.3	0.65	27	128.76	23	2	89.3354	0.39382	3.02848
6	7.95	125	880.8	889	884.9	6.8	2.6	31.3	0.65	27	128.76	23	2	89.3354	0.39382	1.70918
7	7.95	125	880.8	889	884.9	6.8	2.6	31.3	0.65	27	128.76	23	2	89.3354	0.39382	1.47683
8	7.95	125	880.8	889	884.9	6.8	2.6	31.3	0.65	27	128.76	23	2	89.3354	0.39382	2.33535
9	7.95	125	880.8	889	884.9	6.8	2.6	31.3	0.65	27	128.76	23	2	89.3354	0.39382	0.661618
1	7.95	125	911.4	919.6	915.5	8.2	6.9	31	0.81	34	71.06	11.5	1	89.5119	0.824592	13.0203
2	7.95	125	911.4	919.6	915.5	8.2	6.9	31	0.81	34	71.06	11.5	1	89.5119	0.824592	15.6178
3	7.95	125	911.4	919.6	915.5	8.2	6.9	31	0.81	34	71.06	11.5	1	89.5119	0.824592	11.6927
4	7.95	125	911.4	919.6	915.5	8.2	6.9	31	0.81	34	71.06	11.5	1	89.5119	0.824592	10.4971
5	7.95	125	911.4	919.6	915.5	8.2	6.9	31	0.81	34	71.06	11.5	1	89.5119	0.824592	12.0885
6	7.95	125	911.4	919.6	915.5	8.2	6.9	31	0.81	34	71.06	11.5	1	89.5119	0.824592	10.3074
7	7.95	125	911.4	919.6	915.5	8.2	6.9	31	0.81	34	71.06	11.5	1	89.5119	0.824592	9.07051
8	7.95	125	911.4	919.6	915.5	8.2	6.9	31	0.81	34	71.06	11.5	1	89.5119	0.824592	8.75716
9	7.95	125	911.4	919.6	915.5	8.2	6.9	31	0.81	34	71.06	11.5	1	89.5119	0.824592	8.65821
10	7.95	125	911.4	919.6	915.5	8.2	6.9	31	0.81	34	71.06	11.5	1	89.5119	0.824592	7.578
11	7.95	125	911.4	919.6	915.5	8.2	6.9	31	0.81	34	71.06	11.5	1	89.5119	0.824592	6.6627
12	7.95	125	911.4	919.6	915.5	8.2	6.9	31	0.81	34	71.06	11.5	1	89.5119	0.824592	3.79312
3	7.95	125	899.2	904.8	902	4.4	3.4	30.5	0.51	37	141.06	23	2	84.0357	0.475564	0.0285338
4	7.95	125	899.2	904.8	902	4.4	3.4	30.5	0.51	37	141.06	23	2	84.0357	0.475564	1.03197
5	7.95	125	899.2	904.8	902	4.4	3.4	30.5	0.51	37	141.06	23	2	84.0357	0.475564	0.52312
6	7.95	125	899.2	904.8	902	4.4	3.4	30.5	0.51	37	141.06	23	2	84.0357	0.475564	0.6753
7	7.95	125	899.2	904.8	902	4.4	3.4	30.5	0.51	37	141.06	23	2	84.0357	0.475564	0.794191
8	7.95	125	899.2	904.8	902	4.4	3.4	30.5	0.51	37	141.06	23	2	84.0357	0.475564	2.03541
9	7.95	125	899.2	904.8	902	4.4	3.4	30.5	0.51	37	141.06	23	2	84.0357	0.475564	1.8975
10	7.95	125	899.2	904.8	902	4.4	3.4	30.5	0.51	37	141.06	23	2	84.0357	0.475564	1.6835
11	7.95	125	899.2	904.8	902	4.4	3.4	30.5	0.51	37	141.06	23	2	84.0357	0.475564	2.34453
12	7.95	125	899.2	904.8	902	4.4	3.4	30.5	0.51	37	141.06	23	2	84.0357	0.475564	1.09855
1	7.95	125	859	867.7	863.35	8.1	5.8	31	0.574	26	176.64	29	2	87.5484	0.477743	3.65473
2	7.95	125	859	867.7	863.35	8.1	5.8	31	0.574	26	176.64	29	2	87.5484	0.477743	1.64821
3	7.95	125	859	867.7	863.35	8.1	5.8	31	0.574	26	176.64	29	2	87.5484	0.477743	0.678395
4	7.95	125	859	867.7	863.35	8.1	5.8	31	0.574	26	176.64	29	2	87.5484	0.477743	0.525517
1	7.95	125	864.4	873	868.7	8.6	5.4	31.7	0.596	24	83.84	13.5	1	84.1002	0.387969	1.44713
2	7.95	125	864.4	873	868.7	8.6	5.4	31.7	0.596	24	83.84	13.5	1	84.1002	0.387969	0.741022
3	7.95	125	864.4	873	868.7	8.6	5.4	31.7	0.596	24	83.84	13.5	1	84.1002	0.387969	1.00484
4	7.95	125	864.4	873	868.7	8.6	5.4	31.7	0.596	24	83.84	13.5	1	84.1002	0.387969	1.94761
5	7.95	125	864.4	873	868.7	8.6	5.4	31.7	0.596	24	83.84	13.5	1	84.1002	0.387969	1.7575
6	7.95	125	864.4	873	868.7	8.6	5.4	31.7	0.596	24	83.84	13.5	1	84.1002	0.387969	0.562556
7	7.95	125	864.4	873	868.7	8.6	5.4	31.7	0.596	24	83.84	13.5	1	84.1002	0.387969	0.25606
1	8.67	175	894.8	896.7	895.75	1.9	1.3	29.2	0.764	21	70.28	11.5	1	82.1573	0.214181	2.43952
2	8.67	175	894.8	896.7	895.75	1.9	1.3	29.2	0.764	21	70.28	11.5	1	82.1573	0.214181	2.48664
3	8.67	175	894.8	896.7	895.75	1.9	1.3	29.2	0.764	21	70.28	11.5	1	82.1573	0.214181	1.61064
4	8.67	175	894.8	896.7	895.75	1.9	1.3	29.2	0.764	21	70.28	11.5	1	82.1573	0.214181	2.26603
5	8.67	175	894.8	896.7	895.75	1.9	1.3	29.2	0.764	21	70.28	11.5	1	82.1573	0.214181	1.47142
6	8.67	175	894.8	896.7	895.75	1.9	1.3	29.2	0.764	21	70.28	11.5	1	82.1573	0.214181	1.33435
7	8.67	175	894.8	896.7	895.75	1.9	1.3	29.2	0.764	21	70.28	11.5	1	82.1573	0.214181	1.19299
8	8.67	175	894.8	896.7	895.75	1.9	1.3	29.2	0.764	21	70.28	11.5	1	82.1573	0.214181	1.08161
9	8.67	175	894.8	896.7	895.75	1.9	1.3	29.2	0.764	21	70.28	11.5	1	82.1573	0.214181	0.462631
10	8.67	175	894.8	896.7	895.75	1.9	1.3	29.2	0.764	21	70.28	11.5	1	82.1573	0.214181	0.65111
11	8.67	175	894.8	896.7	895.75	1.9	1.3	29.2	0.764	21	70.28	11.5	1	82.1573	0.214181	0.430504
12	8.67	175	894.8	896.7	895.75	1.9	1.3	29.2	0.764	21	70.28	11.5	1	82.1573	0.214181	0.743208
1	8.67	125	909.1	911.8	910.45	2.7	1.9	29.5	0.726	43	91	15	1	82.1573	0.297464	3.38811
2	8.67	125	909.1	911.8	910.45	2.7	1.9	29.5	0.726	43	91	15	1	82.1573	0.297464	3.45356
3	8.67	125	909.1	911.8	910.45	2.7	1.9	29.5	0.726	43	91	15	1	82.1573	0.297464	2.23693
4	8.67	125	909.1	911.8	910.45	2.7	1.9	29.5	0.726	43	91	15	1	82.1573	0.297464	3.14717
5	8.67	125	909.1	911.8	910.45	2.7	1.9	29.5	0.726	43	91	15	1	82.1573	0.297464	2.04358
6	8.67	125	909.1	911.8	910.45	2.7	1.9	29.5	0.726	43	91	15	1	82.1573	0.297464	1.8532
7	8.67	125	909.1	911.8	910.45	2.7	1.9	29.5	0.726	43	91	15	1	82.1573	0.297464	1.65687
8	8.67	125	909.1	911.8	910.45	2.7	1.9	29.5	0.726	43	91	15	1	82.1573	0.297464	1.50219
9	8.67	125	909.1	911.8	910.45	2.7	1.9	29.5	0.726	43	91	15	1	82.1573	0.297464	0.642522
10	8.67	125	909.1	911.8	910.45	2.7	1.9	29.5	0.726	43	91	15	1	82.1573	0.297464	0.904291
11	8.67	125	909.1	911.8	910.45	2.7	1.9	29.5	0.726	43	91	15	1	82.1573	0.297464	0.597903
12	8.67	125	909.1	911.8	910.45	2.7	1.9	29.5	0.726	43	91	15	1	82.1573	0.297464	1.0322
1	8.02	125	933.1	939.6	936.35	6.5	5.8	30.5	0.676	28	73.06	11.5	1	0	0.544979	1.64039
2	8.02	125	933.1	939.6	936.35	6.5	5.8	30.5	0.676	28	73.06	11.5	1	0	0.544979	3.29168
3	8.02	125	933.1	939.6	936.35	6.5	5.8	30.5	0.676	28	73.06	11.5	1	0	0.544979	4.59418
4	8.02	125	933.1	939.6	936.35	6.5	5.8	30.5	0.676	28	73.06	11.5	1	0	0.544979	3.72221
5	8.02	125	933.1	939.6	936.35	6.5	5.8	30.5	0.676	28	73.06	11.5	1	0	0.544979	4.38163
6	8.02	125	933.1	939.6	936.35	6.5	5.8	30.5	0.676	28	73.06	11.5	1	0	0.544979	2.84479
7	8.02	125	933.1	939.6	936.35	6.5	5.8	30.5	0.676	28	73.06	11.5	1	0	0.544979	1.2371
8	8.02	125	933.1	939.6	936.35	6.5	5.8	30.5	0.676	28	73.06	11.5	1	0	0.544979	0.959164
9	8.02	125	933.1	939.6	936.35	6.5	5.8	30.5	0.676	28	73.06	11.5	1	0	0.544979	1.4442
10	8.02	125	933.1	939.6	936.35	6.5	5.8	30.5	0.676	28	73.06	11.5	1	0	0.544979	1.248
11	8.02	125	933.1	939.6	936.35	6.5	5.8	30.5	0.676	28	73.06	11.5	1	0	0.544979	1.53684
12	8.02	125	933.1	939.6	936.35	6.5	5.8	30.5	0.676	28	73.06	11.5	1	0	0.544979	2.01642
1	10.94	175	897.5	904	900.75	4.7	3.3	30.7	1.134	24	90.24	11.5	1	0	0.608814	6.4169
2	10.94	175	897.5	904	900.75	4.7	3.3	30.7	1.134	24	90.24	11.5	1	0	0.608814	5.41236
3	10.94	175	897.5	904	900.75	4.7	3.3	30.7	1.134	24	90.24	11.5	1	0	0.608814	6.20382
4	10.94	175	897.5	904	900.75	4.7	3.3	30.7	1.134	24	90.24	11.5	1	0	0.608814	7.20836
5	10.94	175	897.5	904	900.75	4.7	3.3	30.7	1.134	24	90.24	11.5	1	0	0.608814	6.14294
6	10.94	175	897.5	904	900.75	4.7	3.3	30.7	1.134	24	90.24	11.5	1	0	0.608814	6.12467
7	10.94	175	897.5	904	900.75	4.7	3.3	30.7	1.134	24	90.24	11.5	1	0	0.608814	6.14294
8	10.94	175	897.5	904	900.75	4.7	3.3	30.7	1.134	24	90.24	11.5	1	0	0.608814	7.40927
9	10.94	175	897.5	904	900.75	4.7	3.3	30.7	1.134	24	90.24	11.5	1	0	0.608814	6.58128
10	10.94	175	897.5	904	900.75	4.7	3.3	30.7	1.134	24	90.24	11.5	1	0	0.608814	5.2906
11	10.94	175	897.5	904	900.75	4.7	3.3	30.7	1.134	24	90.24	11.5	1	0	0.608814	5.36366
12	10.94	175	897.5	904	900.75	4.7	3.3	30.7	1.134	24	90.24	11.5	1	0	0.608814	5.55239
1	8.02	125	942.5	949.6	946.05	5.5	3.7	29.7	0.551	28	140.7	23	2	0	0.540784	4.52636
2	8.02	125	942.5	949.6	946.05	5.5	3.7	29.7	0.551	28	140.7	23	2	0	0.540784	4.25597
3	8.02	125	942.5	949.6	946.05	5.5	3.7	29.7	0.551	28	140.7	23	2	0	0.540784	4.05588
4	8.02	125	942.5	949.6	946.05	5.5	3.7	29.7	0.551	28	140.7	23	2	0	0.540784	3.315
5	8.02	125	942.5	949.6	946.05	5.5	3.7	29.7	0.551	28	140.7	23	2	0	0.540784	3.76385
6	8.02	125	942.5	949.6	946.05	5.5	3.7	29.7	0.551	28	140.7	23	2	0	0.540784	3.25552
7	8.02	125	942.5	949.6	946.05	5.5	3.7	29.7	0.551	28	140.7	23	2	0	0.540784	2.76881
8	8.02	125	942.5	949.6	946.05	5.5	3.7	29.7	0.551	28	140.7	23	2	0	0.540784	2.42812
9	8.02	125	942.5	949.6	946.05	5.5	3.7	29.7	0.551	28	140.7	23	2	0	0.540784	3.33123
10	8.02	125	942.5	949.6	946.05	5.5	3.7	29.7	0.551	28	140.7	23	2	0	0.540784	2.46057
11	8.02	125	942.5	949.6	946.05	5.5	3.7	29.7	0.551	28	140.7	23	2	0	0.540784	2.60117
12	8.02	125	942.5	949.6	946.05	5.5	3.7	29.7	0.551	28	140.7	23	2	0	0.540784	2.73096
1	7.95	125	859.6	872	865.8	10.9	8.4	31.6	0.571	32	124.2	17	2	97.6707	0.781682	2.11836
2	7.95	125	859.6	872	865.8	10.9	8.4	31.6	0.571	32	124.2	17	2	97.6707	0.781682	1.89949
3	7.95	125	859.6	872	865.8	10.9	8.4	31.6	0.571	32	124.2	17	2	97.6707	0.781682	2.66554
4	7.95	125	859.6	872	865.8	10.9	8.4	31.6	0.571	32	124.2	17	2	97.6707	0.781682	6.62866
5	7.95	125	859.6	872	865.8	10.9	8.4	31.6	0.571	32	124.2	17	2	97.6707	0.781682	9.30983
6	7.95	125	859.6	872	865.8	10.9	8.4	31.6	0.571	32	124.2	17	2	97.6707	0.781682	10.5449
7	7.95	125	859.6	872	865.8	10.9	8.4	31.6	0.571	32	124.2	17	2	97.6707	0.781682	10.5214
8	7.95	125	859.6	872	865.8	10.9	8.4	31.6	0.571	32	124.2	17	2	97.6707	0.781682	8.55942
9	7.95	125	859.6	872	865.8	10.9	8.4	31.6	0.571	32	124.2	17	2	97.6707	0.781682	8.32491
10	7.95	125	859.6	872	865.8	10.9	8.4	31.6	0.571	32	124.2	17	2	97.6707	0.781682	7.51978
11	7.95	125	859.6	872	865.8	10.9	8.4	31.6	0.571	32	124.2	17	2	97.6707	0.781682	6.38634
12	7.95	125	859.6	872	865.8	10.9	8.4	31.6	0.571	32	124.2	17	2	97.6707	0.781682	5.58121
1	8.02	125	909.1	917.8	913.45	7.5	6.4	29.4	0.551	0	185.56	29	2	86.1326	0.968472	6.24664
2	8.02	125	909.1	917.8	913.45	7.5	6.4	29.4	0.551	0	185.56	29	2	86.1326	0.968472	9.80094
3	8.02	125	909.1	917.8	913.45	7.5	6.4	29.4	0.551	0	185.56	29	2	86.1326	0.968472	11.2343
4	8.02	125	909.1	917.8	913.45	7.5	6.4	29.4	0.551	0	185.56	29	2	86.1326	0.968472	11.3505
5	8.02	125	909.1	917.8	913.45	7.5	6.4	29.4	0.551	0	185.56	29	2	86.1326	0.968472	11.5345
6	8.02	125	909.1	917.8	913.45	7.5	6.4	29.4	0.551	0	185.56	29	2	86.1326	0.968472	10.3917
7	8.02	125	909.1	917.8	913.45	7.5	6.4	29.4	0.551	0	185.56	29	2	86.1326	0.968472	8.67751
8	8.02	125	909.1	917.8	913.45	7.5	6.4	29.4	0.551	0	185.56	29	2	86.1326	0.968472	8.60003
9	8.02	125	909.1	917.8	913.45	7.5	6.4	29.4	0.551	0	185.56	29	2	86.1326	0.968472	6.29507
10	8.02	125	909.1	917.8	913.45	7.5	6.4	29.4	0.551	0	185.56	29	2	86.1326	0.968472	5.09416
11	8.02	125	909.1	917.8	913.45	7.5	6.4	29.4	0.551	0	185.56	29	2	86.1326	0.968472	5.19101
12	8.02	125	909.1	917.8	913.45	7.5	6.4	29.4	0.551	0	185.56	29	2	86.1326	0.968472	3.05069
1	8.02	125	886.5	897.9	892.2	10.8	10.3	31.7	0.755	31	181.4	29	2	85.3921	0.69849	8.76605
2	8.02	125	886.5	897.9	892.2	10.8	10.3	31.7	0.755	31	181.4	29	2	85.3921	0.69849	7.08967
3	8.02	125	886.5	897.9	892.2	10.8	10.3	31.7	0.755	31	181.4	29	2	85.3921	0.69849	8.91273
4	8.02	125	886.5	897.9	892.2	10.8	10.3	31.7	0.755	31	181.4	29	2	85.3921	0.69849	8.06756
5	8.02	125	886.5	897.9	892.2	10.8	10.3	31.7	0.755	31	181.4	29	2	85.3921	0.69849	6.35626
6	8.02	125	886.5	897.9	892.2	10.8	10.3	31.7	0.755	31	181.4	29	2	85.3921	0.69849	4.74973
7	8.02	125	886.5	897.9	892.2	10.8	10.3	31.7	0.755	31	181.4	29	2	85.3921	0.69849	4.00933
8	8.02	125	886.5	897.9	892.2	10.8	10.3	31.7	0.755	31	181.4	29	2	85.3921	0.69849	3.53436
9	8.02	125	886.5	897.9	892.2	10.8	10.3	31.7	0.755	31	181.4	29	2	85.3921	0.69849	3.28989
1	10.26	150	906.4	914.1	910.25	6.6	3	31.7	0.634	39	10.15	0	2	85.4595	0.982692	1.55265
2	10.26	150	906.4	914.1	910.25	6.6	3	31.7	0.634	39	10.15	0	2	85.4595	0.982692	2.77119
3	10.26	150	906.4	914.1	910.25	6.6	3	31.7	0.634	39	10.15	0	2	85.4595	0.982692	7.59621
4	10.26	150	906.4	914.1	910.25	6.6	3	31.7	0.634	39	10.15	0	2	85.4595	0.982692	4.60882
5	10.26	150	906.4	914.1	910.25	6.6	3	31.7	0.634	39	10.15	0	2	85.4595	0.982692	4.18627
6	10.26	150	906.4	914.1	910.25	6.6	3	31.7	0.634	39	10.15	0	2	85.4595	0.982692	2.89894
7	10.26	150	906.4	914.1	910.25	6.6	3	31.7	0.634	39	10.15	0	2	85.4595	0.982692	1.29715
8	10.26	150	906.4	914.1	910.25	6.6	3	31.7	0.634	39	10.15	0	2	85.4595	0.982692	1.43473
1	8.02	125	863.2	873.3	868.25	9.1	6.7	29.1	0.359	23	149.2	23	2	89.7424	0.711522	3.29435
2	8.02	125	863.2	873.3	868.25	9.1	6.7	29.1	0.359	23	149.2	23	2	89.7424	0.711522	0.80402
3	8.02	125	863.2	873.3	868.25	9.1	6.7	29.1	0.359	23	149.2	23	2	89.7424	0.711522	0.889402
4	8.02	125	863.2	873.3	868.25	9.1	6.7	29.1	0.359	23	149.2	23	2	89.7424	0.711522	0.775559
5	8.02	125	863.2	873.3	868.25	9.1	6.7	29.1	0.359	23	149.2	23	2	89.7424	0.711522	1.17401
6	8.02	125	863.2	873.3	868.25	9.1	6.7	29.1	0.359	23	149.2	23	2	89.7424	0.711522	1.31632
7	8.02	125	863.2	873.3	868.25	9.1	6.7	29.1	0.359	23	149.2	23	2	89.7424	0.711522	0.868057
8	8.02	125	863.2	873.3	868.25	9.1	6.7	29.1	0.359	23	149.2	23	2	89.7424	0.711522	0.0711522
1	8.02	125	875.7	884	879.85	7.4	4.4	31.1	0.613	29	85	15	1	94.0789	0.535307	5.18178
2	8.02	125	875.7	884	879.85	7.4	4.4	31.1	0.613	29	85	15	1	94.0789	0.535307	3.82745
3	8.02	125	875.7	884	879.85	7.4	4.4	31.1	0.613	29	85	15	1	94.0789	0.535307	3.64544
4	8.02	125	875.7	884	879.85	7.4	4.4	31.1	0.613	29	85	15	1	94.0789	0.535307	3.09943
5	8.02	125	875.7	884	879.85	7.4	4.4	31.1	0.613	29	85	15	1	94.0789	0.535307	2.60159
6	8.02	125	875.7	884	879.85	7.4	4.4	31.1	0.613	29	85	15	1	94.0789	0.535307	2.62836
7	8.02	125	875.7	884	879.85	7.4	4.4	31.1	0.613	29	85	15	1	94.0789	0.535307	2.01276
8	8.02	125	875.7	884	879.85	7.4	4.4	31.1	0.613	29	85	15	1	94.0789	0.535307	1.48815
9	8.02	125	875.7	884	879.85	7.4	4.4	31.1	0.613	29	85	15	1	94.0789	0.535307	1.26333
10	8.02	125	875.7	884	879.85	7.4	4.4	31.1	0.613	29	85	15	1	94.0789	0.535307	1.53098
11	8.02	125	875.7	884	879.85	7.4	4.4	31.1	0.613	29	85	15	1	94.0789	0.535307	1.38645
12	8.02	125	875.7	884	879.85	7.4	4.4	31.1	0.613	29	85	15	1	94.0789	0.535307	1.33827
1	10.26	150	863.9	870.5	867.2	6.6	4.4	31.6	0.916	30	65	11.5	1	93.4483	0.893441	2.24254
2	10.26	150	863.9	870.5	867.2	6.6	4.4	31.6	0.916	30	65	11.5	1	93.4483	0.893441	0.920244
3	10.26	150	863.9	870.5	867.2	6.6	4.4	31.6	0.916	30	65	11.5	1	93.4483	0.893441	0.410983
4	10.26	150	863.9	870.5	867.2	6.6	4.4	31.6	0.916	30	65	11.5	1	93.4483	0.893441	0.634343
5	10.26	150	863.9	870.5	867.2	6.6	4.4	31.6	0.916	30	65	11.5	1	93.4483	0.893441	0.500327
6	10.26	150	863.9	870.5	867.2	6.6	4.4	31.6	0.916	30	65	11.5	1	93.4483	0.893441	0.393114
7	10.26	150	863.9	870.5	867.2	6.6	4.4	31.6	0.916	30	65	11.5	1	93.4483	0.893441	0.687949
8	10.26	150	863.9	870.5	867.2	6.6	4.4	31.6	0.916	30	65	11.5	1	93.4483	0.893441	0.723687
9	10.26	150	863.9	870.5	867.2	6.6	4.4	31.6	0.916	30	65	11.5	1	93.4483	0.893441	0.813031
1	7.79	150	853.1	865.5	859.3	10.8	4.7	30.8	0.915	29	135.44	23	2	95.5899	1	1.87
2	7.79	150	853.1	865.5	859.3	10.8	4.7	30.8	0.915	29	135.44	23	2	95.5899	1	1.81
3	7.79	150	853.1	865.5	859.3	10.8	4.7	30.8	0.915	29	135.44	23	2	95.5899	1	4.16
4	7.79	150	853.1	865.5	859.3	10.8	4.7	30.8	0.915	29	135.44	23	2	95.5899	1	5.21
5	7.79	150	853.1	865.5	859.3	10.8	4.7	30.8	0.915	29	135.44	23	2	95.5899	1	3.37
6	7.79	150	853.1	865.5	859.3	10.8	4.7	30.8	0.915	29	135.44	23	2	95.5899	1	4.09
7	7.79	150	853.1	865.5	859.3	10.8	4.7	30.8	0.915	29	135.44	23	2	95.5899	1	4.42
8	7.79	150	853.1	865.5	859.3	10.8	4.7	30.8	0.915	29	135.44	23	2	95.5899	1	4.01
9	7.79	150	853.1	865.5	859.3	10.8	4.7	30.8	0.915	29	135.44	23	2	95.5899	1	3.34
10	7.79	150	853.1	865.5	859.3	10.8	4.7	30.8	0.915	29	135.44	23	2	95.5899	1	4.32
11	7.79	150	853.1	865.5	859.3	10.8	4.7	30.8	0.915	29	135.44	23	2	95.5899	1	4.83
12	7.79	150	853.1	865.5	859.3	10.8	4.7	30.8	0.915	29	135.44	23	2	95.5899	1	5.58
1	9.01	175	883	888.7	885.85	5.7	3.3	29.7	0.925	20	114.74	0	1	96.7259	0.754151	2.55657
2	9.01	175	883	888.7	885.85	5.7	3.3	29.7	0.925	20	114.74	0	1	96.7259	0.754151	2.90348
3	9.01	175	883	888.7	885.85	5.7	3.3	29.7	0.925	20	114.74	0	1	96.7259	0.754151	2.55657
4	9.01	175	883	888.7	885.85	5.7	3.3	29.7	0.925	20	114.74	0	1	96.7259	0.754151	2.20212
5	9.01	175	883	888.7	885.85	5.7	3.3	29.7	0.925	20	114.74	0	1	96.7259	0.754151	2.29262
6	9.01	175	883	888.7	885.85	5.7	3.3	29.7	0.925	20	114.74	0	1	96.7259	0.754151	1.74963
7	9.01	175	883	888.7	885.85	5.7	3.3	29.7	0.925	20	114.74	0	1	96.7259	0.754151	1.20664
8	9.01	175	883	888.7	885.85	5.7	3.3	29.7	0.925	20	114.74	0	1	96.7259	0.754151	1.13877
9	9.01	175	883	888.7	885.85	5.7	3.3	29.7	0.925	20	114.74	0	1	96.7259	0.754151	0.987937
10	9.01	175	883	888.7	885.85	5.7	3.3	29.7	0.925	20	114.74	0	1	96.7259	0.754151	1.16139
11	9.01	175	883	888.7	885.85	5.7	3.3	29.7	0.925	20	114.74	0	1	96.7259	0.754151	0.889898
12	9.01	175	883	888.7	885.85	5.7	3.3	29.7	0.925	20	114.74	0	1	96.7259	0.754151	1.11614
1	10.62	150	859.1	866.8	862.95	7.2	3.6	30.1	0.959	0	0	0	2	0	0.414384	0.774898
2	10.62	150	859.1	866.8	862.95	7.2	3.6	30.1	0.959	0	0	0	2	0	0.414384	1.02767
3	10.62	150	859.1	866.8	862.95	7.2	3.6	30.1	0.959	0	0	0	2	0	0.414384	1.02353
4	10.62	150	859.1	866.8	862.95	7.2	3.6	30.1	0.959	0	0	0	2	0	0.414384	1.33846
5	10.62	150	859.1	866.8	862.95	7.2	3.6	30.1	0.959	0	0	0	2	0	0.414384	1.71555
6	10.62	150	859.1	866.8	862.95	7.2	3.6	30.1	0.959	0	0	0	2	0	0.414384	1.64511
7	10.62	150	859.1	866.8	862.95	7.2	3.6	30.1	0.959	0	0	0	2	0	0.414384	2.11336
8	10.62	150	859.1	866.8	862.95	7.2	3.6	30.1	0.959	0	0	0	2	0	0.414384	1.83158
9	10.62	150	859.1	866.8	862.95	7.2	3.6	30.1	0.959	0	0	0	2	0	0.414384	1.82743
1	8.08	125	892.7	900.1	896.4	6.9	5.9	30.1	0.551	29	169.73	29	2	94.2308	0.695276	2.55166
2	8.08	125	892.7	900.1	896.4	6.9	5.9	30.1	0.551	29	169.73	29	2	94.2308	0.695276	2.23879
3	8.08	125	892.7	900.1	896.4	6.9	5.9	30.1	0.551	29	169.73	29	2	94.2308	0.695276	1.57828
4	8.08	125	892.7	900.1	896.4	6.9	5.9	30.1	0.551	29	169.73	29	2	94.2308	0.695276	3.08007
5	8.08	125	892.7	900.1	896.4	6.9	5.9	30.1	0.551	29	169.73	29	2	94.2308	0.695276	2.29441
6	8.08	125	892.7	900.1	896.4	6.9	5.9	30.1	0.551	29	169.73	29	2	94.2308	0.695276	2.12059
7	8.08	125	892.7	900.1	896.4	6.9	5.9	30.1	0.551	29	169.73	29	2	94.2308	0.695276	1.87029
8	8.08	125	892.7	900.1	896.4	6.9	5.9	30.1	0.551	29	169.73	29	2	94.2308	0.695276	1.96763
9	8.08	125	892.7	900.1	896.4	6.9	5.9	30.1	0.551	29	169.73	29	2	94.2308	0.695276	1.68257
10	8.08	125	892.7	900.1	896.4	6.9	5.9	30.1	0.551	29	169.73	29	2	94.2308	0.695276	1.27931
11	8.08	125	892.7	900.1	896.4	6.9	5.9	30.1	0.551	29	169.73	29	2	94.2308	0.695276	0.945575
1	7.79	150	868.3	875	871.65	5.8	4.6	31.7	1.434	0	141.12	29	2	89.7272	0.613921	2.25309
2	7.79	150	868.3	875	871.65	5.8	4.6	31.7	1.434	0	141.12	29	2	89.7272	0.613921	1.43044
3	7.79	150	868.3	875	871.65	5.8	4.6	31.7	1.434	0	141.12	29	2	89.7272	0.613921	0.681453
4	7.79	150	868.3	875	871.65	5.8	4.6	31.7	1.434	0	141.12	29	2	89.7272	0.613921	1.03139
5	7.79	150	868.3	875	871.65	5.8	4.6	31.7	1.434	0	141.12	29	2	89.7272	0.613921	0.650757
6	7.79	150	868.3	875	871.65	5.8	4.6	31.7	1.434	0	141.12	29	2	89.7272	0.613921	1.7067
7	7.79	150	868.3	875	871.65	5.8	4.6	31.7	1.434	0	141.12	29	2	89.7272	0.613921	4.75175
8	7.79	150	868.3	875	871.65	5.8	4.6	31.7	1.434	0	141.12	29	2	89.7272	0.613921	5.08327
9	7.79	150	868.3	875	871.65	5.8	4.6	31.7	1.434	0	141.12	29	2	89.7272	0.613921	5.13238
10	7.79	150	868.3	875	871.65	5.8	4.6	31.7	1.434	0	141.12	29	2	89.7272	0.613921	4.51232
11	7.79	150	868.3	875	871.65	5.8	4.6	31.7	1.434	0	141.12	29	2	89.7272	0.613921	4.84384
12	7.79	150	868.3	875	871.65	5.8	4.6	31.7	1.434	0	141.12	29	2	89.7272	0.613921	5.04029
1	8.08	125	968.3	977.6	972.95	9.3	8.2	30.3	0.865	19	94.28	15	1	89.4069	0.897371	13.5952
2	8.08	125	968.3	977.6	972.95	9.3	8.2	30.3	0.865	19	94.28	15	1	89.4069	0.897371	15.031
3	8.08	125	968.3	977.6	972.95	9.3	8.2	30.3	0.865	19	94.28	15	1	89.4069	0.897371	12.5542
4	8.08	125	968.3	977.6	972.95	9.3	8.2	30.3	0.865	19	94.28	15	1	89.4069	0.897371	10.6338
5	8.08	125	968.3	977.6	972.95	9.3	8.2	30.3	0.865	19	94.28	15	1	89.4069	0.897371	8.6686
6	8.08	125	968.3	977.6	972.95	9.3	8.2	30.3	0.865	19	94.28	15	1	89.4069	0.897371	5.03425
7	8.08	125	968.3	977.6	972.95	9.3	8.2	30.3	0.865	19	94.28	15	1	89.4069	0.897371	2.47674
1	10.26	150	959.2	964	961.6	4.2	3.6	31.7	0.61	39	169.1	27	2	98.4453	0.273406	0.576887
2	10.26	150	959.2	964	961.6	4.2	3.6	31.7	0.61	39	169.1	27	2	98.4453	0.273406	0.339024
3	10.26	150	959.2	964	961.6	4.2	3.6	31.7	0.61	39	169.1	27	2	98.4453	0.273406	0.404641
4	10.26	150	959.2	964	961.6	4.2	3.6	31.7	0.61	39	169.1	27	2	98.4453	0.273406	0.568685
5	10.26	150	959.2	964	961.6	4.2	3.6	31.7	0.61	39	169.1	27	2	98.4453	0.273406	0.67258
6	10.26	150	959.2	964	961.6	4.2	3.6	31.7	0.61	39	169.1	27	2	98.4453	0.273406	0.574153
7	10.26	150	959.2	964	961.6	4.2	3.6	31.7	0.61	39	169.1	27	2	98.4453	0.273406	1.03348
8	10.26	150	959.2	964	961.6	4.2	3.6	31.7	0.61	39	169.1	27	2	98.4453	0.273406	1.42718
9	10.26	150	959.2	964	961.6	4.2	3.6	31.7	0.61	39	169.1	27	2	98.4453	0.273406	1.79081
10	10.26	150	959.2	964	961.6	4.2	3.6	31.7	0.61	39	169.1	27	2	98.4453	0.273406	1.93025
11	10.26	150	959.2	964	961.6	4.2	3.6	31.7	0.61	39	169.1	27	2	98.4453	0.273406	2.01227
12	10.26	150	959.2	964	961.6	4.2	3.6	31.7	0.61	39	169.1	27	2	98.4453	0.273406	1.67872
1	10.06	175	932.4	939.7	936.05	7.3	5.6	31.7	0.914	25	117.24	19	1	96.1971	0.910877	6.78603
2	10.06	175	932.4	939.7	936.05	7.3	5.6	31.7	0.914	25	117.24	19	1	96.1971	0.910877	13.7725
3	10.06	175	932.4	939.7	936.05	7.3	5.6	31.7	0.914	25	117.24	19	1	96.1971	0.910877	13.7907
4	10.06	175	932.4	939.7	936.05	7.3	5.6	31.7	0.914	25	117.24	19	1	96.1971	0.910877	10.8759
5	10.06	175	932.4	939.7	936.05	7.3	5.6	31.7	0.914	25	117.24	19	1	96.1971	0.910877	9.54599
6	10.06	175	932.4	939.7	936.05	7.3	5.6	31.7	0.914	25	117.24	19	1	96.1971	0.910877	7.76067
7	10.06	175	932.4	939.7	936.05	7.3	5.6	31.7	0.914	25	117.24	19	1	96.1971	0.910877	5.35596
8	10.06	175	932.4	939.7	936.05	7.3	5.6	31.7	0.914	25	117.24	19	1	96.1971	0.910877	5.41972
9	10.06	175	932.4	939.7	936.05	7.3	5.6	31.7	0.914	25	117.24	19	1	96.1971	0.910877	3.96231
10	10.06	175	932.4	939.7	936.05	7.3	5.6	31.7	0.914	25	117.24	19	1	96.1971	0.910877	3.64351
11	10.06	175	932.4	939.7	936.05	7.3	5.6	31.7	0.914	25	117.24	19	1	96.1971	0.910877	2.83283
12	10.06	175	932.4	939.7	936.05	7.3	5.6	31.7	0.914	25	117.24	19	1	96.1971	0.910877	1.99482
1	9.48	125	934.5	938.7	936.6	4.2	2.7	29.5	0.465	27	98.56	11.5	1	87.9238	0.292113	0.449853
2	9.48	125	934.5	938.7	936.6	4.2	2.7	29.5	0.465	27	98.56	11.5	1	87.9238	0.292113	0.496591
3	9.48	125	934.5	938.7	936.6	4.2	2.7	29.5	0.465	27	98.56	11.5	1	87.9238	0.292113	1.25608
4	9.48	125	934.5	938.7	936.6	4.2	2.7	29.5	0.465	27	98.56	11.5	1	87.9238	0.292113	0.49367
5	9.48	125	934.5	938.7	936.6	4.2	2.7	29.5	0.465	27	98.56	11.5	1	87.9238	0.292113	1.06913
6	9.48	125	934.5	938.7	936.6	4.2	2.7	29.5	0.465	27	98.56	11.5	1	87.9238	0.292113	0.832521
7	9.48	125	934.5	938.7	936.6	4.2	2.7	29.5	0.465	27	98.56	11.5	1	87.9238	0.292113	0.864653
8	9.48	125	934.5	938.7	936.6	4.2	2.7	29.5	0.465	27	98.56	11.5	1	87.9238	0.292113	1.15092
9	9.48	125	934.5	938.7	936.6	4.2	2.7	29.5	0.465	27	98.56	11.5	1	87.9238	0.292113	0.867574
10	9.48	125	934.5	938.7	936.6	4.2	2.7	29.5	0.465	27	98.56	11.5	1	87.9238	0.292113	1.05161
11	9.48	125	934.5	938.7	936.6	4.2	2.7	29.5	0.465	27	98.56	11.5	1	87.9238	0.292113	0.841284
12	9.48	125	934.5	938.7	936.6	4.2	2.7	29.5	0.465	27	98.56	11.5	1	87.9238	0.292113	0.800389
1	10.26	150	1003.1	1012.3	1007.7	7.4	5.6	30.6	0.975	34	151.02	23	2	0	0.933541	1.23227
2	10.26	150	1003.1	1012.3	1007.7	7.4	5.6	30.6	0.975	34	151.02	23	2	0	0.933541	0.81218
3	10.26	150	1003.1	1012.3	1007.7	7.4	5.6	30.6	0.975	34	151.02	23	2	0	0.933541	0.905535
4	10.26	150	1003.1	1012.3	1007.7	7.4	5.6	30.6	0.975	34	151.02	23	2	0	0.933541	1.28829
5	10.26	150	1003.1	1012.3	1007.7	7.4	5.6	30.6	0.975	34	151.02	23	2	0	0.933541	1.51234
6	10.26	150	1003.1	1012.3	1007.7	7.4	5.6	30.6	0.975	34	151.02	23	2	0	0.933541	1.25094
7	10.26	150	1003.1	1012.3	1007.7	7.4	5.6	30.6	0.975	34	151.02	23	2	0	0.933541	1.3723
8	10.26	150	1003.1	1012.3	1007.7	7.4	5.6	30.6	0.975	34	151.02	23	2	0	0.933541	1.503
9	10.26	150	1003.1	1012.3	1007.7	7.4	5.6	30.6	0.975	34	151.02	23	2	0	0.933541	0.896199
10	10.26	150	1003.1	1012.3	1007.7	7.4	5.6	30.6	0.975	34	151.02	23	2	0	0.933541	0.718826
1	10.26	150	975.9	983.3	979.6	6.8	4.8	31.8	1.193	33	187.48	29	2	97.6567	0.486736	1.68411
2	10.26	150	975.9	983.3	979.6	6.8	4.8	31.8	1.193	33	187.48	29	2	97.6567	0.486736	1.6111
3	10.26	150	975.9	983.3	979.6	6.8	4.8	31.8	1.193	33	187.48	29	2	97.6567	0.486736	1.11463
4	10.26	150	975.9	983.3	979.6	6.8	4.8	31.8	1.193	33	187.48	29	2	97.6567	0.486736	0.924798
5	10.26	150	975.9	983.3	979.6	6.8	4.8	31.8	1.193	33	187.48	29	2	97.6567	0.486736	1.22171
6	10.26	150	975.9	983.3	979.6	6.8	4.8	31.8	1.193	33	187.48	29	2	97.6567	0.486736	0.579216
7	10.26	150	975.9	983.3	979.6	6.8	4.8	31.8	1.193	33	187.48	29	2	97.6567	0.486736	0.33098
1	10.26	150	985.1	993.1	989.1	6.6	5	30.8	1.193	31	189.69	29	2	97.6567	0.507017	1.75428
2	10.26	150	985.1	993.1	989.1	6.6	5	30.8	1.193	31	189.69	29	2	97.6567	0.507017	1.67823
3	10.26	150	985.1	993.1	989.1	6.6	5	30.8	1.193	31	189.69	29	2	97.6567	0.507017	1.16107
4	10.26	150	985.1	993.1	989.1	6.6	5	30.8	1.193	31	189.69	29	2	97.6567	0.507017	0.963332
5	10.26	150	985.1	993.1	989.1	6.6	5	30.8	1.193	31	189.69	29	2	97.6567	0.507017	1.27261
6	10.26	150	985.1	993.1	989.1	6.6	5	30.8	1.193	31	189.69	29	2	97.6567	0.507017	0.60335
7	10.26	150	985.1	993.1	989.1	6.6	5	30.8	1.193	31	189.69	29	2	97.6567	0.507017	0.344771
1	9.5	175	953.5	959.9	956.7	6.4	3.7	30.6	0.714	25	141.62	23.5	1	95.1172	0.979061	4.24912
2	9.5	175	953.5	959.9	956.7	6.4	3.7	30.6	0.714	25	141.62	23.5	1	95.1172	0.979061	3.51483
3	9.5	175	953.5	959.9	956.7	6.4	3.7	30.6	0.714	25	141.62	23.5	1	95.1172	0.979061	2.09519
4	9.5	175	953.5	959.9	956.7	6.4	3.7	30.6	0.714	25	141.62	23.5	1	95.1172	0.979061	1.55671
5	9.5	175	953.5	959.9	956.7	6.4	3.7	30.6	0.714	25	141.62	23.5	1	95.1172	0.979061	2.65326
6	9.5	175	953.5	959.9	956.7	6.4	3.7	30.6	0.714	25	141.62	23.5	1	95.1172	0.979061	3.36797
8	9.5	175	953.5	959.9	956.7	6.4	3.7	30.6	0.714	25	141.62	23.5	1	95.1172	0.979061	0.704924
7	9.5	175	953.5	959.9	956.7	6.4	3.7	30.6	0.714	25	141.62	23.5	1	95.1172	0.979061	0.930108
1	9.48	125	991.6	998.4	995	6.4	5.4	30.7	1.044	31	165.48	27	2	85.5044	0.604147	1.24454
2	9.48	125	991.6	998.4	995	6.4	5.4	30.7	1.044	31	165.48	27	2	85.5044	0.604147	2.07223
3	9.48	125	991.6	998.4	995	6.4	5.4	30.7	1.044	31	165.48	27	2	85.5044	0.604147	2.28368
4	9.48	125	991.6	998.4	995	6.4	5.4	30.7	1.044	31	165.48	27	2	85.5044	0.604147	2.20514
5	9.48	125	991.6	998.4	995	6.4	5.4	30.7	1.044	31	165.48	27	2	85.5044	0.604147	1.78223
6	9.48	125	991.6	998.4	995	6.4	5.4	30.7	1.044	31	165.48	27	2	85.5044	0.604147	2.22326
1	9.3	150	858	867	862.5	9	7.2	31.7	0.987	19	102.2	17	1	92.8619	0.781026	0.999713
2	9.3	150	858	867	862.5	9	7.2	31.7	0.987	19	102.2	17	1	92.8619	0.781026	0.991903
3	9.3	150	858	867	862.5	9	7.2	31.7	0.987	19	102.2	17	1	92.8619	0.781026	1.35899
4	9.3	150	858	867	862.5	9	7.2	31.7	0.987	19	102.2	17	1	92.8619	0.781026	1.68702
5	9.3	150	858	867	862.5	9	7.2	31.7	0.987	19	102.2	17	1	92.8619	0.781026	1.00752
6	9.3	150	858	867	862.5	9	7.2	31.7	0.987	19	102.2	17	1	92.8619	0.781026	1.6011
7	9.3	150	858	867	862.5	9	7.2	31.7	0.987	19	102.2	17	1	92.8619	0.781026	1.51519
8	9.3	150	858	867	862.5	9	7.2	31.7	0.987	19	102.2	17	1	92.8619	0.781026	0.812267
9	9.3	150	858	867	862.5	9	7.2	31.7	0.987	19	102.2	17	1	92.8619	0.781026	1.40585
10	9.3	150	858	867	862.5	9	7.2	31.7	0.987	19	102.2	17	1	92.8619	0.781026	0.476426
1	7.79	150	841.4	848.8	845.1	6.9	3.2	31.7	0.93	27	115.96	19	1	96.3258	0.405008	1.20692
2	7.79	150	841.4	848.8	845.1	6.9	3.2	31.7	0.93	27	115.96	19	1	96.3258	0.405008	1.09352
3	7.79	150	841.4	848.8	845.1	6.9	3.2	31.7	0.93	27	115.96	19	1	96.3258	0.405008	0.761415
4	7.79	150	841.4	848.8	845.1	6.9	3.2	31.7	0.93	27	115.96	19	1	96.3258	0.405008	0.372608
5	7.79	150	841.4	848.8	845.1	6.9	3.2	31.7	0.93	27	115.96	19	1	96.3258	0.405008	1.83064
6	7.79	150	841.4	848.8	845.1	6.9	3.2	31.7	0.93	27	115.96	19	1	96.3258	0.405008	2.88771
7	7.79	150	841.4	848.8	845.1	6.9	3.2	31.7	0.93	27	115.96	19	1	96.3258	0.405008	1.27578
8	7.79	150	841.4	848.8	845.1	6.9	3.2	31.7	0.93	27	115.96	19	1	96.3258	0.405008	1.64838
9	7.79	150	841.4	848.8	845.1	6.9	3.2	31.7	0.93	27	115.96	19	1	96.3258	0.405008	1.94404
1	7.86	150	887.9	894.3	891.1	6	4.6	30.7	0.919	27	176.84	29	2	95.1051	0.463069	0.0231534
2	7.86	150	887.9	894.3	891.1	6	4.6	30.7	0.919	27	176.84	29	2	95.1051	0.463069	0.342671
3	7.86	150	887.9	894.3	891.1	6	4.6	30.7	0.919	27	176.84	29	2	95.1051	0.463069	0.467699
4	7.86	150	887.9	894.3	891.1	6	4.6	30.7	0.919	27	176.84	29	2	95.1051	0.463069	0.569574
5	7.86	150	887.9	894.3	891.1	6	4.6	30.7	0.919	27	176.84	29	2	95.1051	0.463069	0.314887
6	7.86	150	887.9	894.3	891.1	6	4.6	30.7	0.919	27	176.84	29	2	95.1051	0.463069	0.634404
7	7.86	150	887.9	894.3	891.1	6	4.6	30.7	0.919	27	176.84	29	2	95.1051	0.463069	0.53716
8	7.86	150	887.9	894.3	891.1	6	4.6	30.7	0.919	27	176.84	29	2	95.1051	0.463069	0.67145
9	7.86	150	887.9	894.3	891.1	6	4.6	30.7	0.919	27	176.84	29	2	95.1051	0.463069	1.32901
10	7.86	150	887.9	894.3	891.1	6	4.6	30.7	0.919	27	176.84	29	2	95.1051	0.463069	1.00486
11	7.86	150	887.9	894.3	891.1	6	4.6	30.7	0.919	27	176.84	29	2	95.1051	0.463069	0.689972
1	10.41	150	968.4	977.1	972.75	8.5	5.3	31.8	3.567	41	281.68	47	2	95.4361	1	4.94
2	10.41	150	968.4	977.1	972.75	8.5	5.3	31.8	3.567	41	281.68	47	2	95.4361	1	3.58
3	10.41	150	968.4	977.1	972.75	8.5	5.3	31.8	3.567	41	281.68	47	2	95.4361	1	1.78
4	10.41	150	968.4	977.1	972.75	8.5	5.3	31.8	3.567	41	281.68	47	2	95.4361	1	2.12
5	10.41	150	968.4	977.1	972.75	8.5	5.3	31.8	3.567	41	281.68	47	2	95.4361	1	3.87
6	10.41	150	968.4	977.1	972.75	8.5	5.3	31.8	3.567	41	281.68	47	2	95.4361	1	9.27
7	10.41	150	968.4	977.1	972.75	8.5	5.3	31.8	3.567	41	281.68	47	2	95.4361	1	6.85
8	10.41	150	968.4	977.1	972.75	8.5	5.3	31.8	3.567	41	281.68	47	2	95.4361	1	2.74
9	10.41	150	968.4	977.1	972.75	8.5	5.3	31.8	3.567	41	281.68	47	2	95.4361	1	1.87
10	10.41	150	968.4	977.1	972.75	8.5	5.3	31.8	3.567	41	281.68	47	2	95.4361	1	1.55
11	10.41	150	968.4	977.1	972.75	8.5	5.3	31.8	3.567	41	281.68	47	2	95.4361	1	1.92
12	10.41	150	968.4	977.1	972.75	8.5	5.3	31.8	3.567	41	281.68	47	2	95.4361	1	2.75
1	9.95	175	998.7	1001.4	1000.05	2.7	2.3	29.7	0.983	33	134.28	19.5	1	90.8472	0.399544	1.51427
2	9.95	175	998.7	1001.4	1000.05	2.7	2.3	29.7	0.983	33	134.28	19.5	1	90.8472	0.399544	2.78482
3	9.95	175	998.7	1001.4	1000.05	2.7	2.3	29.7	0.983	33	134.28	19.5	1	90.8472	0.399544	2.48916
4	9.95	175	998.7	1001.4	1000.05	2.7	2.3	29.7	0.983	33	134.28	19.5	1	90.8472	0.399544	3.69578
5	9.95	175	998.7	1001.4	1000.05	2.7	2.3	29.7	0.983	33	134.28	19.5	1	90.8472	0.399544	2.88471
6	9.95	175	998.7	1001.4	1000.05	2.7	2.3	29.7	0.983	33	134.28	19.5	1	90.8472	0.399544	2.39327
7	9.95	175	998.7	1001.4	1000.05	2.7	2.3	29.7	0.983	33	134.28	19.5	1	90.8472	0.399544	2.12158
8	9.95	175	998.7	1001.4	1000.05	2.7	2.3	29.7	0.983	33	134.28	19.5	1	90.8472	0.399544	1.5742
9	9.95	175	998.7	1001.4	1000.05	2.7	2.3	29.7	0.983	33	134.28	19.5	1	90.8472	0.399544	1.15868
10	9.95	175	998.7	1001.4	1000.05	2.7	2.3	29.7	0.983	33	134.28	19.5	1	90.8472	0.399544	0.966897
11	9.95	175	998.7	1001.4	1000.05	2.7	2.3	29.7	0.983	33	134.28	19.5	1	90.8472	0.399544	0.335617
1	9.95	175	996.3	997.1	996.7	0.8	0.6	26.5	0.076	28	130.2	19.5	1	90.8472	0.00805839	0.0305413
2	9.95	175	996.3	997.1	996.7	0.8	0.6	26.5	0.076	28	130.2	19.5	1	90.8472	0.00805839	0.056167
3	9.95	175	996.3	997.1	996.7	0.8	0.6	26.5	0.076	28	130.2	19.5	1	90.8472	0.00805839	0.0502038
4	9.95	175	996.3	997.1	996.7	0.8	0.6	26.5	0.076	28	130.2	19.5	1	90.8472	0.00805839	0.0745401
5	9.95	175	996.3	997.1	996.7	0.8	0.6	26.5	0.076	28	130.2	19.5	1	90.8472	0.00805839	0.0581816
6	9.95	175	996.3	997.1	996.7	0.8	0.6	26.5	0.076	28	130.2	19.5	1	90.8472	0.00805839	0.0482697
7	9.95	175	996.3	997.1	996.7	0.8	0.6	26.5	0.076	28	130.2	19.5	1	90.8472	0.00805839	0.04279
8	9.95	175	996.3	997.1	996.7	0.8	0.6	26.5	0.076	28	130.2	19.5	1	90.8472	0.00805839	0.03175
9	9.95	175	996.3	997.1	996.7	0.8	0.6	26.5	0.076	28	130.2	19.5	1	90.8472	0.00805839	0.0233693
10	9.95	175	996.3	997.1	996.7	0.8	0.6	26.5	0.076	28	130.2	19.5	1	90.8472	0.00805839	0.0195013
11	9.95	175	996.3	997.1	996.7	0.8	0.6	26.5	0.076	28	130.2	19.5	1	90.8472	0.00805839	0.00676905
1	9.95	175	986.2	990.3	988.25	4.1	3.7	29	0.906	27	130.2	19.5	1	90.8472	0.592398	2.24519
2	9.95	175	986.2	990.3	988.25	4.1	3.7	29	0.906	27	130.2	19.5	1	90.8472	0.592398	4.12901
3	9.95	175	986.2	990.3	988.25	4.1	3.7	29	0.906	27	130.2	19.5	1	90.8472	0.592398	3.69064
4	9.95	175	986.2	990.3	988.25	4.1	3.7	29	0.906	27	130.2	19.5	1	90.8472	0.592398	5.47968
5	9.95	175	986.2	990.3	988.25	4.1	3.7	29	0.906	27	130.2	19.5	1	90.8472	0.592398	4.27711
6	9.95	175	986.2	990.3	988.25	4.1	3.7	29	0.906	27	130.2	19.5	1	90.8472	0.592398	3.54846
7	9.95	175	986.2	990.3	988.25	4.1	3.7	29	0.906	27	130.2	19.5	1	90.8472	0.592398	3.14563
8	9.95	175	986.2	990.3	988.25	4.1	3.7	29	0.906	27	130.2	19.5	1	90.8472	0.592398	2.33405
9	9.95	175	986.2	990.3	988.25	4.1	3.7	29	0.906	27	130.2	19.5	1	90.8472	0.592398	1.71795
10	9.95	175	986.2	990.3	988.25	4.1	3.7	29	0.906	27	130.2	19.5	1	90.8472	0.592398	1.4336
11	9.95	175	986.2	990.3	988.25	4.1	3.7	29	0.906	27	130.2	19.5	1	90.8472	0.592398	0.497614
1	10.26	150	858.7	864.3	861.5	5.3	1.9	31.3	0.898	29	85	15	1	91.1033	0.214549	0.336842
2	10.26	150	858.7	864.3	861.5	5.3	1.9	31.3	0.898	29	85	15	1	91.1033	0.214549	1.9245
3	10.26	150	858.7	864.3	861.5	5.3	1.9	31.3	0.898	29	85	15	1	91.1033	0.214549	1.44177
4	10.26	150	858.7	864.3	861.5	5.3	1.9	31.3	0.898	29	85	15	1	91.1033	0.214549	3.22682
5	10.26	150	858.7	864.3	861.5	5.3	1.9	31.3	0.898	29	85	15	1	91.1033	0.214549	2.82346
6	10.26	150	858.7	864.3	861.5	5.3	1.9	31.3	0.898	29	85	15	1	91.1033	0.214549	1.39457
7	10.26	150	858.7	864.3	861.5	5.3	1.9	31.3	0.898	29	85	15	1	91.1033	0.214549	0.0407643
1	10.26	150	874.3	883.7	879	9.4	6.6	31.7	0.923	34	85	15	1	91.1033	0.766023	1.20266
2	10.26	150	874.3	883.7	879	9.4	6.6	31.7	0.923	34	85	15	1	91.1033	0.766023	6.87123
3	10.26	150	874.3	883.7	879	9.4	6.6	31.7	0.923	34	85	15	1	91.1033	0.766023	5.14768
4	10.26	150	874.3	883.7	879	9.4	6.6	31.7	0.923	34	85	15	1	91.1033	0.766023	11.521
5	10.26	150	874.3	883.7	879	9.4	6.6	31.7	0.923	34	85	15	1	91.1033	0.766023	10.0809
6	10.26	150	874.3	883.7	879	9.4	6.6	31.7	0.923	34	85	15	1	91.1033	0.766023	4.97915
7	10.26	150	874.3	883.7	879	9.4	6.6	31.7	0.923	34	85	15	1	91.1033	0.766023	0.145544
2	10.26	150	880.3	886.5	883.4	6.2	4.5	31.6	1.004	17	90.72	15	1	92.2291	0.306821	2.01581
3	10.26	150	880.3	886.5	883.4	6.2	4.5	31.6	1.004	17	90.72	15	1	92.2291	0.306821	2.26741
4	10.26	150	880.3	886.5	883.4	6.2	4.5	31.6	1.004	17	90.72	15	1	92.2291	0.306821	2.7215
5	10.26	150	880.3	886.5	883.4	6.2	4.5	31.6	1.004	17	90.72	15	1	92.2291	0.306821	3.51617
6	10.26	150	880.3	886.5	883.4	6.2	4.5	31.6	1.004	17	90.72	15	1	92.2291	0.306821	3.21548
7	10.26	150	880.3	886.5	883.4	6.2	4.5	31.6	1.004	17	90.72	15	1	92.2291	0.306821	2.14775
8	10.26	150	880.3	886.5	883.4	6.2	4.5	31.6	1.004	17	90.72	15	1	92.2291	0.306821	2.03115
2	10.26	150	889.2	899.1	894.15	9.3	7.1	31.7	1.01	26	199.36	33	2	92.2291	0.486988	3.19951
3	10.26	150	889.2	899.1	894.15	9.3	7.1	31.7	1.01	26	199.36	33	2	92.2291	0.486988	3.59884
4	10.26	150	889.2	899.1	894.15	9.3	7.1	31.7	1.01	26	199.36	33	2	92.2291	0.486988	4.31959
5	10.26	150	889.2	899.1	894.15	9.3	7.1	31.7	1.01	26	199.36	33	2	92.2291	0.486988	5.58089
6	10.26	150	889.2	899.1	894.15	9.3	7.1	31.7	1.01	26	199.36	33	2	92.2291	0.486988	5.10364
7	10.26	150	889.2	899.1	894.15	9.3	7.1	31.7	1.01	26	199.36	33	2	92.2291	0.486988	3.40892
8	10.26	150	889.2	899.1	894.15	9.3	7.1	31.7	1.01	26	199.36	33	2	92.2291	0.486988	3.22386
1	9.01	175	874.9	880.5	877.7	5.6	4.3	31.5	1.134	30	114.46	19	1	95.9722	0.443513	0.492299
2	9.01	175	874.9	880.5	877.7	5.6	4.3	31.5	1.134	30	114.46	19	1	95.9722	0.443513	2.25304
3	9.01	175	874.9	880.5	877.7	5.6	4.3	31.5	1.134	30	114.46	19	1	95.9722	0.443513	2.18208
4	9.01	175	874.9	880.5	877.7	5.6	4.3	31.5	1.134	30	114.46	19	1	95.9722	0.443513	2.55463
5	9.01	175	874.9	880.5	877.7	5.6	4.3	31.5	1.134	30	114.46	19	1	95.9722	0.443513	1.63213
6	9.01	175	874.9	880.5	877.7	5.6	4.3	31.5	1.134	30	114.46	19	1	95.9722	0.443513	1.29506
1	9.95	175	977.4	977.9	977.65	0.5	0.3	24.4	0.014	30	102.2	14.5	1	94.8763	0.000396339	0.00110975
2	9.95	175	977.4	977.9	977.65	0.5	0.3	24.4	0.014	30	102.2	14.5	1	94.8763	0.000396339	0.000733226
3	9.95	175	977.4	977.9	977.65	0.5	0.3	24.4	0.014	30	102.2	14.5	1	94.8763	0.000396339	0.00275852
4	9.95	175	977.4	977.9	977.65	0.5	0.3	24.4	0.014	30	102.2	14.5	1	94.8763	0.000396339	0.0038207
5	9.95	175	977.4	977.9	977.65	0.5	0.3	24.4	0.014	30	102.2	14.5	1	94.8763	0.000396339	0.0030954
6	9.95	175	977.4	977.9	977.65	0.5	0.3	24.4	0.014	30	102.2	14.5	1	94.8763	0.000396339	0.00187864
7	9.95	175	977.4	977.9	977.65	0.5	0.3	24.4	0.014	30	102.2	14.5	1	94.8763	0.000396339	0.000856091
8	9.95	175	977.4	977.9	977.65	0.5	0.3	24.4	0.014	30	102.2	14.5	1	94.8763	0.000396339	0.000646032
9	9.95	175	977.4	977.9	977.65	0.5	0.3	24.4	0.014	30	102.2	14.5	1	94.8763	0.000396339	0.000380485
1	9.95	175	978.6	981.5	980.05	2.9	2.1	32.7	1.08	26	126	19.5	1	94.8763	0.214023	0.599264
2	9.95	175	978.6	981.5	980.05	2.9	2.1	32.7	1.08	26	126	19.5	1	94.8763	0.214023	0.395942
3	9.95	175	978.6	981.5	980.05	2.9	2.1	32.7	1.08	26	126	19.5	1	94.8763	0.214023	1.4896
4	9.95	175	978.6	981.5	980.05	2.9	2.1	32.7	1.08	26	126	19.5	1	94.8763	0.214023	2.06318
5	9.95	175	978.6	981.5	980.05	2.9	2.1	32.7	1.08	26	126	19.5	1	94.8763	0.214023	1.67152
6	9.95	175	978.6	981.5	980.05	2.9	2.1	32.7	1.08	26	126	19.5	1	94.8763	0.214023	1.01447
7	9.95	175	978.6	981.5	980.05	2.9	2.1	32.7	1.08	26	126	19.5	1	94.8763	0.214023	0.462289
8	9.95	175	978.6	981.5	980.05	2.9	2.1	32.7	1.08	26	126	19.5	1	94.8763	0.214023	0.348857
9	9.95	175	978.6	981.5	980.05	2.9	2.1	32.7	1.08	26	126	19.5	1	94.8763	0.214023	0.205462
1	9.95	175	982.2	985.6	983.9	3.4	3.1	32.5	1.037	23	126	19.5	1	94.8763	0.303359	0.849406
2	9.95	175	982.2	985.6	983.9	3.4	3.1	32.5	1.037	23	126	19.5	1	94.8763	0.303359	0.561215
3	9.95	175	982.2	985.6	983.9	3.4	3.1	32.5	1.037	23	126	19.5	1	94.8763	0.303359	2.11138
4	9.95	175	982.2	985.6	983.9	3.4	3.1	32.5	1.037	23	126	19.5	1	94.8763	0.303359	2.92439
5	9.95	175	982.2	985.6	983.9	3.4	3.1	32.5	1.037	23	126	19.5	1	94.8763	0.303359	2.36924
6	9.95	175	982.2	985.6	983.9	3.4	3.1	32.5	1.037	23	126	19.5	1	94.8763	0.303359	1.43792
7	9.95	175	982.2	985.6	983.9	3.4	3.1	32.5	1.037	23	126	19.5	1	94.8763	0.303359	0.655256
8	9.95	175	982.2	985.6	983.9	3.4	3.1	32.5	1.037	23	126	19.5	1	94.8763	0.303359	0.494476
9	9.95	175	982.2	985.6	983.9	3.4	3.1	32.5	1.037	23	126	19.5	1	94.8763	0.303359	0.291225
1	9.95	175	987.7	989.5	988.6	1.8	1.5	32	0.999	26	126	19.5	1	94.8763	0.141408	0.395942
2	9.95	175	987.7	989.5	988.6	1.8	1.5	32	0.999	26	126	19.5	1	94.8763	0.141408	0.261605
3	9.95	175	987.7	989.5	988.6	1.8	1.5	32	0.999	26	126	19.5	1	94.8763	0.141408	0.984199
4	9.95	175	987.7	989.5	988.6	1.8	1.5	32	0.999	26	126	19.5	1	94.8763	0.141408	1.36317
5	9.95	175	987.7	989.5	988.6	1.8	1.5	32	0.999	26	126	19.5	1	94.8763	0.141408	1.1044
6	9.95	175	987.7	989.5	988.6	1.8	1.5	32	0.999	26	126	19.5	1	94.8763	0.141408	0.670274
7	9.95	175	987.7	989.5	988.6	1.8	1.5	32	0.999	26	126	19.5	1	94.8763	0.141408	0.305441
8	9.95	175	987.7	989.5	988.6	1.8	1.5	32	0.999	26	126	19.5	1	94.8763	0.141408	0.230495
9	9.95	175	987.7	989.5	988.6	1.8	1.5	32	0.999	26	126	19.5	1	94.8763	0.141408	0.135752
1	9.95	175	993.3	994.2	993.75	0.9	0.7	29.2	0.355	29	102.12	14.5	1	94.8763	0.02345	0.0656601
2	9.95	175	993.3	994.2	993.75	0.9	0.7	29.2	0.355	29	102.12	14.5	1	94.8763	0.02345	0.0433826
3	9.95	175	993.3	994.2	993.75	0.9	0.7	29.2	0.355	29	102.12	14.5	1	94.8763	0.02345	0.163212
4	9.95	175	993.3	994.2	993.75	0.9	0.7	29.2	0.355	29	102.12	14.5	1	94.8763	0.02345	0.226058
5	9.95	175	993.3	994.2	993.75	0.9	0.7	29.2	0.355	29	102.12	14.5	1	94.8763	0.02345	0.183145
6	9.95	175	993.3	994.2	993.75	0.9	0.7	29.2	0.355	29	102.12	14.5	1	94.8763	0.02345	0.111153
7	9.95	175	993.3	994.2	993.75	0.9	0.7	29.2	0.355	29	102.12	14.5	1	94.8763	0.02345	0.0506521
8	9.95	175	993.3	994.2	993.75	0.9	0.7	29.2	0.355	29	102.12	14.5	1	94.8763	0.02345	0.0382236
9	9.95	175	993.3	994.2	993.75	0.9	0.7	29.2	0.355	29	102.12	14.5	1	94.8763	0.02345	0.022512
1	9.95	175	994.9	997	995.95	2.1	1.9	32.3	1.009	27	126	19.5	1	94.8763	0.18091	0.506547
2	9.95	175	994.9	997	995.95	2.1	1.9	32.3	1.009	27	126	19.5	1	94.8763	0.18091	0.334683
3	9.95	175	994.9	997	995.95	2.1	1.9	32.3	1.009	27	126	19.5	1	94.8763	0.18091	1.25913
4	9.95	175	994.9	997	995.95	2.1	1.9	32.3	1.009	27	126	19.5	1	94.8763	0.18091	1.74397
5	9.95	175	994.9	997	995.95	2.1	1.9	32.3	1.009	27	126	19.5	1	94.8763	0.18091	1.4129
6	9.95	175	994.9	997	995.95	2.1	1.9	32.3	1.009	27	126	19.5	1	94.8763	0.18091	0.857512
7	9.95	175	994.9	997	995.95	2.1	1.9	32.3	1.009	27	126	19.5	1	94.8763	0.18091	0.390765
8	9.95	175	994.9	997	995.95	2.1	1.9	32.3	1.009	27	126	19.5	1	94.8763	0.18091	0.294883
9	9.95	175	994.9	997	995.95	2.1	1.9	32.3	1.009	27	126	19.5	1	94.8763	0.18091	0.173673
1	9.95	175	997.8	999.8	998.8	2	1.2	32.3	1.205	31	128.24	19.5	1	94.8763	0.136454	0.38207
2	9.95	175	997.8	999.8	998.8	2	1.2	32.3	1.205	31	128.24	19.5	1	94.8763	0.136454	0.252439
3	9.95	175	997.8	999.8	998.8	2	1.2	32.3	1.205	31	128.24	19.5	1	94.8763	0.136454	0.949718
4	9.95	175	997.8	999.8	998.8	2	1.2	32.3	1.205	31	128.24	19.5	1	94.8763	0.136454	1.31541
5	9.95	175	997.8	999.8	998.8	2	1.2	32.3	1.205	31	128.24	19.5	1	94.8763	0.136454	1.0657
6	9.95	175	997.8	999.8	998.8	2	1.2	32.3	1.205	31	128.24	19.5	1	94.8763	0.136454	0.646791
7	9.95	175	997.8	999.8	998.8	2	1.2	32.3	1.205	31	128.24	19.5	1	94.8763	0.136454	0.29474
8	9.95	175	997.8	999.8	998.8	2	1.2	32.3	1.205	31	128.24	19.5	1	94.8763	0.136454	0.22242
9	9.95	175	997.8	999.8	998.8	2	1.2	32.3	1.205	31	128.24	19.5	1	94.8763	0.136454	0.130996
1	10.06	175	956.3	957.4	956.85	1.1	1.1	29.2	0.999	28	130	19.5	1	93.3278	0.254687	1.62745
2	10.06	175	956.3	957.4	956.85	1.1	1.1	29.2	0.999	28	130	19.5	1	93.3278	0.254687	1.86177
3	10.06	175	956.3	957.4	956.85	1.1	1.1	29.2	0.999	28	130	19.5	1	93.3278	0.254687	1.05186
4	10.06	175	956.3	957.4	956.85	1.1	1.1	29.2	0.999	28	130	19.5	1	93.3278	0.254687	1.32437
5	10.06	175	956.3	957.4	956.85	1.1	1.1	29.2	0.999	28	130	19.5	1	93.3278	0.254687	1.21995
6	10.06	175	956.3	957.4	956.85	1.1	1.1	29.2	0.999	28	130	19.5	1	93.3278	0.254687	0.730953
7	10.06	175	956.3	957.4	956.85	1.1	1.1	29.2	0.999	28	130	19.5	1	93.3278	0.254687	0.473719
8	10.06	175	956.3	957.4	956.85	1.1	1.1	29.2	0.999	28	130	19.5	1	93.3278	0.254687	0.728406
9	10.06	175	956.3	957.4	956.85	1.1	1.1	29.2	0.999	28	130	19.5	1	93.3278	0.254687	0.532297
10	10.06	175	956.3	957.4	956.85	1.1	1.1	29.2	0.999	28	130	19.5	1	93.3278	0.254687	0.221578
11	10.06	175	956.3	957.4	956.85	1.1	1.1	29.2	0.999	28	130	19.5	1	93.3278	0.254687	0.348922
12	10.06	175	956.3	957.4	956.85	1.1	1.1	29.2	0.999	28	130	19.5	1	93.3278	0.254687	0.471172
1	10.06	175	960	963.6	961.8	3.6	2	31.6	0.519	31	200.2	24.5	1	93.3278	0.240573	1.53726
2	10.06	175	960	963.6	961.8	3.6	2	31.6	0.519	31	200.2	24.5	1	93.3278	0.240573	1.75859
3	10.06	175	960	963.6	961.8	3.6	2	31.6	0.519	31	200.2	24.5	1	93.3278	0.240573	0.993566
4	10.06	175	960	963.6	961.8	3.6	2	31.6	0.519	31	200.2	24.5	1	93.3278	0.240573	1.25098
5	10.06	175	960	963.6	961.8	3.6	2	31.6	0.519	31	200.2	24.5	1	93.3278	0.240573	1.15234
6	10.06	175	960	963.6	961.8	3.6	2	31.6	0.519	31	200.2	24.5	1	93.3278	0.240573	0.690444
7	10.06	175	960	963.6	961.8	3.6	2	31.6	0.519	31	200.2	24.5	1	93.3278	0.240573	0.447466
8	10.06	175	960	963.6	961.8	3.6	2	31.6	0.519	31	200.2	24.5	1	93.3278	0.240573	0.688039
9	10.06	175	960	963.6	961.8	3.6	2	31.6	0.519	31	200.2	24.5	1	93.3278	0.240573	0.502797
10	10.06	175	960	963.6	961.8	3.6	2	31.6	0.519	31	200.2	24.5	1	93.3278	0.240573	0.209298
11	10.06	175	960	963.6	961.8	3.6	2	31.6	0.519	31	200.2	24.5	1	93.3278	0.240573	0.329585
12	10.06	175	960	963.6	961.8	3.6	2	31.6	0.519	31	200.2	24.5	1	93.3278	0.240573	0.44506
1	10.06	175	967.5	968.1	967.8	0.6	0.6	28.3	0.413	39	140	19.5	1	93.3278	0.0574316	0.366988
2	10.06	175	967.5	968.1	967.8	0.6	0.6	28.3	0.413	39	140	19.5	1	93.3278	0.0574316	0.419825
3	10.06	175	967.5	968.1	967.8	0.6	0.6	28.3	0.413	39	140	19.5	1	93.3278	0.0574316	0.237192
4	10.06	175	967.5	968.1	967.8	0.6	0.6	28.3	0.413	39	140	19.5	1	93.3278	0.0574316	0.298644
5	10.06	175	967.5	968.1	967.8	0.6	0.6	28.3	0.413	39	140	19.5	1	93.3278	0.0574316	0.275097
6	10.06	175	967.5	968.1	967.8	0.6	0.6	28.3	0.413	39	140	19.5	1	93.3278	0.0574316	0.164829
7	10.06	175	967.5	968.1	967.8	0.6	0.6	28.3	0.413	39	140	19.5	1	93.3278	0.0574316	0.106823
8	10.06	175	967.5	968.1	967.8	0.6	0.6	28.3	0.413	39	140	19.5	1	93.3278	0.0574316	0.164254
9	10.06	175	967.5	968.1	967.8	0.6	0.6	28.3	0.413	39	140	19.5	1	93.3278	0.0574316	0.120032
10	10.06	175	967.5	968.1	967.8	0.6	0.6	28.3	0.413	39	140	19.5	1	93.3278	0.0574316	0.0499655
11	10.06	175	967.5	968.1	967.8	0.6	0.6	28.3	0.413	39	140	19.5	1	93.3278	0.0574316	0.0786813
12	10.06	175	967.5	968.1	967.8	0.6	0.6	28.3	0.413	39	140	19.5	1	93.3278	0.0574316	0.106248
1	10.06	175	974.7	977.2	975.95	2.5	2	30.3	0.965	28	160.16	24.6	1	93.3278	0.447308	2.8583
2	10.06	175	974.7	977.2	975.95	2.5	2	30.3	0.965	28	160.16	24.6	1	93.3278	0.447308	3.26982
3	10.06	175	974.7	977.2	975.95	2.5	2	30.3	0.965	28	160.16	24.6	1	93.3278	0.447308	1.84738
4	10.06	175	974.7	977.2	975.95	2.5	2	30.3	0.965	28	160.16	24.6	1	93.3278	0.447308	2.326
5	10.06	175	974.7	977.2	975.95	2.5	2	30.3	0.965	28	160.16	24.6	1	93.3278	0.447308	2.14261
6	10.06	175	974.7	977.2	975.95	2.5	2	30.3	0.965	28	160.16	24.6	1	93.3278	0.447308	1.28377
7	10.06	175	974.7	977.2	975.95	2.5	2	30.3	0.965	28	160.16	24.6	1	93.3278	0.447308	0.831993
8	10.06	175	974.7	977.2	975.95	2.5	2	30.3	0.965	28	160.16	24.6	1	93.3278	0.447308	1.2793
9	10.06	175	974.7	977.2	975.95	2.5	2	30.3	0.965	28	160.16	24.6	1	93.3278	0.447308	0.934874
10	10.06	175	974.7	977.2	975.95	2.5	2	30.3	0.965	28	160.16	24.6	1	93.3278	0.447308	0.389158
11	10.06	175	974.7	977.2	975.95	2.5	2	30.3	0.965	28	160.16	24.6	1	93.3278	0.447308	0.612812
12	10.06	175	974.7	977.2	975.95	2.5	2	30.3	0.965	28	160.16	24.6	1	93.3278	0.447308	0.82752
1	10.94	175	882.6	886	884.3	3.4	3.4	32.1	0.997	27	65	11.5	1	97.9425	0.363873	1.3718
2	10.94	175	882.6	886	884.3	3.4	3.4	32.1	0.997	27	65	11.5	1	97.9425	0.363873	1.75023
3	10.94	175	882.6	886	884.3	3.4	3.4	32.1	0.997	27	65	11.5	1	97.9425	0.363873	2.24509
4	10.94	175	882.6	886	884.3	3.4	3.4	32.1	0.997	27	65	11.5	1	97.9425	0.363873	2.28148
5	10.94	175	882.6	886	884.3	3.4	3.4	32.1	0.997	27	65	11.5	1	97.9425	0.363873	2.20507
6	10.94	175	882.6	886	884.3	3.4	3.4	32.1	0.997	27	65	11.5	1	97.9425	0.363873	2.95464
7	10.94	175	882.6	886	884.3	3.4	3.4	32.1	0.997	27	65	11.5	1	97.9425	0.363873	2.03769
8	10.94	175	882.6	886	884.3	3.4	3.4	32.1	0.997	27	65	11.5	1	97.9425	0.363873	2.42703
9	10.94	175	882.6	886	884.3	3.4	3.4	32.1	0.997	27	65	11.5	1	97.9425	0.363873	2.78362
10	10.94	175	882.6	886	884.3	3.4	3.4	32.1	0.997	27	65	11.5	1	97.9425	0.363873	1.92125
11	10.94	175	882.6	886	884.3	3.4	3.4	32.1	0.997	27	65	11.5	1	97.9425	0.363873	1.33541
12	10.94	175	882.6	886	884.3	3.4	3.4	32.1	0.997	27	65	11.5	1	97.9425	0.363873	1.72112
1	10.26	150	868	873.1	870.55	4.4	3.4	31.5	1.016	29	179.16	29	2	96.1258	0.415043	2.4612
2	10.26	150	868	873.1	870.55	4.4	3.4	31.5	1.016	29	179.16	29	2	96.1258	0.415043	1.97145
3	10.26	150	868	873.1	870.55	4.4	3.4	31.5	1.016	29	179.16	29	2	96.1258	0.415043	1.49415
4	10.26	150	868	873.1	870.55	4.4	3.4	31.5	1.016	29	179.16	29	2	96.1258	0.415043	0.522954
5	10.26	150	868	873.1	870.55	4.4	3.4	31.5	1.016	29	179.16	29	2	96.1258	0.415043	0.854988
6	10.26	150	868	873.1	870.55	4.4	3.4	31.5	1.016	29	179.16	29	2	96.1258	0.415043	0.547856
7	10.26	150	868	873.1	870.55	4.4	3.4	31.5	1.016	29	179.16	29	2	96.1258	0.415043	0.240725
1	8.08	125	916.3	927.3	921.8	9.5	5.2	30.5	0.652	28	168.24	27	2	90.8971	0.76199	10.2716
2	8.08	125	916.3	927.3	921.8	9.5	5.2	30.5	0.652	28	168.24	27	2	90.8971	0.76199	16.0247
3	8.08	125	916.3	927.3	921.8	9.5	5.2	30.5	0.652	28	168.24	27	2	90.8971	0.76199	17.5944
4	8.08	125	916.3	927.3	921.8	9.5	5.2	30.5	0.652	28	168.24	27	2	90.8971	0.76199	15.2246
5	8.08	125	916.3	927.3	921.8	9.5	5.2	30.5	0.652	28	168.24	27	2	90.8971	0.76199	13.9749
6	8.08	125	916.3	927.3	921.8	9.5	5.2	30.5	0.652	28	168.24	27	2	90.8971	0.76199	10.6602
7	8.08	125	916.3	927.3	921.8	9.5	5.2	30.5	0.652	28	168.24	27	2	90.8971	0.76199	10.3935
8	8.08	125	916.3	927.3	921.8	9.5	5.2	30.5	0.652	28	168.24	27	2	90.8971	0.76199	9.41058
9	8.08	125	916.3	927.3	921.8	9.5	5.2	30.5	0.652	28	168.24	27	2	90.8971	0.76199	6.23308
10	8.08	125	916.3	927.3	921.8	9.5	5.2	30.5	0.652	28	168.24	27	2	90.8971	0.76199	6.36262
11	8.08	125	916.3	927.3	921.8	9.5	5.2	30.5	0.652	28	168.24	27	2	90.8971	0.76199	6.74361
12	8.08	125	916.3	927.3	921.8	9.5	5.2	30.5	0.652	28	168.24	27	2	90.8971	0.76199	5.25773
1	8.02	125	1002.4	1010.9	1006.65	8	6.7	29.4	0.541	30	96.28	15	1	91.4418	0.919438	12.5135
2	8.02	125	1002.4	1010.9	1006.65	8	6.7	29.4	0.541	30	96.28	15	1	91.4418	0.919438	11.0333
3	8.02	125	1002.4	1010.9	1006.65	8	6.7	29.4	0.541	30	96.28	15	1	91.4418	0.919438	8.89096
4	8.02	125	1002.4	1010.9	1006.65	8	6.7	29.4	0.541	30	96.28	15	1	91.4418	0.919438	5.12127
5	8.02	125	1002.4	1010.9	1006.65	8	6.7	29.4	0.541	30	96.28	15	1	91.4418	0.919438	4.22941
6	8.02	125	1002.4	1010.9	1006.65	8	6.7	29.4	0.541	30	96.28	15	1	91.4418	0.919438	3.21803
7	8.02	125	1002.4	1010.9	1006.65	8	6.7	29.4	0.541	30	96.28	15	1	91.4418	0.919438	1.82968
8	8.02	125	1002.4	1010.9	1006.65	8	6.7	29.4	0.541	30	96.28	15	1	91.4418	0.919438	1.41593
1	10.26	150	878	885.6	881.8	6.4	4	29.3	0.78	27	227.51	37	2	91.2427	0.255704	1.20692
2	10.26	150	878	885.6	881.8	6.4	4	29.3	0.78	27	227.51	37	2	91.2427	0.255704	0.989575
3	10.26	150	878	885.6	881.8	6.4	4	29.3	0.78	27	227.51	37	2	91.2427	0.255704	0.917978
4	10.26	150	878	885.6	881.8	6.4	4	29.3	0.78	27	227.51	37	2	91.2427	0.255704	1.31688
5	10.26	150	878	885.6	881.8	6.4	4	29.3	0.78	27	227.51	37	2	91.2427	0.255704	1.65696
6	10.26	150	878	885.6	881.8	6.4	4	29.3	0.78	27	227.51	37	2	91.2427	0.255704	1.98682
7	10.26	150	878	885.6	881.8	6.4	4	29.3	0.78	27	227.51	37	2	91.2427	0.255704	1.29386
8	10.26	150	878	885.6	881.8	6.4	4	29.3	0.78	27	227.51	37	2	91.2427	0.255704	1.02793
9	10.26	150	878	885.6	881.8	6.4	4	29.3	0.78	27	227.51	37	2	91.2427	0.255704	0.894965
10	10.26	150	878	885.6	881.8	6.4	4	29.3	0.78	27	227.51	37	2	91.2427	0.255704	0.644375
1	10.26	150	896.2	904.1	900.15	6.6	4.4	31.6	2.064	26	200.42	32	2	91.2427	0.744296	3.51308
2	10.26	150	896.2	904.1	900.15	6.6	4.4	31.6	2.064	26	200.42	32	2	91.2427	0.744296	2.88042
3	10.26	150	896.2	904.1	900.15	6.6	4.4	31.6	2.064	26	200.42	32	2	91.2427	0.744296	2.67202
4	10.26	150	896.2	904.1	900.15	6.6	4.4	31.6	2.064	26	200.42	32	2	91.2427	0.744296	3.83312
5	10.26	150	896.2	904.1	900.15	6.6	4.4	31.6	2.064	26	200.42	32	2	91.2427	0.744296	4.82304
6	10.26	150	896.2	904.1	900.15	6.6	4.4	31.6	2.064	26	200.42	32	2	91.2427	0.744296	5.78318
7	10.26	150	896.2	904.1	900.15	6.6	4.4	31.6	2.064	26	200.42	32	2	91.2427	0.744296	3.76614
8	10.26	150	896.2	904.1	900.15	6.6	4.4	31.6	2.064	26	200.42	32	2	91.2427	0.744296	2.99207
9	10.26	150	896.2	904.1	900.15	6.6	4.4	31.6	2.064	26	200.42	32	2	91.2427	0.744296	2.60504
10	10.26	150	896.2	904.1	900.15	6.6	4.4	31.6	2.064	26	200.42	32	2	91.2427	0.744296	1.87563
1	10.62	150	866.6	872.9	869.75	5.7	5.3	32.2	0.615	30	111.46	17	2	97.6079	0.657767	2.53898
2	10.62	150	866.6	872.9	869.75	5.7	5.3	32.2	0.615	30	111.46	17	2	97.6079	0.657767	2.38112
3	10.62	150	866.6	872.9	869.75	5.7	5.3	32.2	0.615	30	111.46	17	2	97.6079	0.657767	2.85471
4	10.62	150	866.6	872.9	869.75	5.7	5.3	32.2	0.615	30	111.46	17	2	97.6079	0.657767	3.92029
5	10.62	150	866.6	872.9	869.75	5.7	5.3	32.2	0.615	30	111.46	17	2	97.6079	0.657767	5.17005
6	10.62	150	866.6	872.9	869.75	5.7	5.3	32.2	0.615	30	111.46	17	2	97.6079	0.657767	2.82182
7	10.62	150	866.6	872.9	869.75	5.7	5.3	32.2	0.615	30	111.46	17	2	97.6079	0.657767	2.25614
8	10.62	150	866.6	872.9	869.75	5.7	5.3	32.2	0.615	30	111.46	17	2	97.6079	0.657767	2.38112
9	10.62	150	866.6	872.9	869.75	5.7	5.3	32.2	0.615	30	111.46	17	2	97.6079	0.657767	1.95357
10	10.62	150	866.6	872.9	869.75	5.7	5.3	32.2	0.615	30	111.46	17	2	97.6079	0.657767	0.907719
11	10.62	150	866.6	872.9	869.75	5.7	5.3	32.2	0.615	30	111.46	17	2	97.6079	0.657767	1.2366
12	10.62	150	866.6	872.9	869.75	5.7	5.3	32.2	0.615	30	111.46	17	2	97.6079	0.657767	1.30896
1	10.26	150	910.9	917.9	914.4	7	4.8	30.6	0.468	24	94.5	15	1	92.1888	0.506014	4.77172
2	10.26	150	910.9	917.9	914.4	7	4.8	30.6	0.468	24	94.5	15	1	92.1888	0.506014	3.99751
3	10.26	150	910.9	917.9	914.4	7	4.8	30.6	0.468	24	94.5	15	1	92.1888	0.506014	2.43393
4	10.26	150	910.9	917.9	914.4	7	4.8	30.6	0.468	24	94.5	15	1	92.1888	0.506014	2.65152
5	10.26	150	910.9	917.9	914.4	7	4.8	30.6	0.468	24	94.5	15	1	92.1888	0.506014	2.20116
6	10.26	150	910.9	917.9	914.4	7	4.8	30.6	0.468	24	94.5	15	1	92.1888	0.506014	3.02091
7	10.26	150	910.9	917.9	914.4	7	4.8	30.6	0.468	24	94.5	15	1	92.1888	0.506014	1.92791
8	10.26	150	910.9	917.9	914.4	7	4.8	30.6	0.468	24	94.5	15	1	92.1888	0.506014	2.35803
9	10.26	150	910.9	917.9	914.4	7	4.8	30.6	0.468	24	94.5	15	1	92.1888	0.506014	1.54334
10	10.26	150	910.9	917.9	914.4	7	4.8	30.6	0.468	24	94.5	15	1	92.1888	0.506014	0.101203
11	10.26	150	910.9	917.9	914.4	7	4.8	30.6	0.468	24	94.5	15	1	92.1888	0.506014	0.177105
12	10.26	150	910.9	917.9	914.4	7	4.8	30.6	0.468	24	94.5	15	1	92.1888	0.506014	0.318789
1	10.26	150	928.5	932.7	930.6	4.2	3.5	31.7	0.619	27	71.96	11.5	1	92.1888	0.488016	4.60199
2	10.26	150	928.5	932.7	930.6	4.2	3.5	31.7	0.619	27	71.96	11.5	1	92.1888	0.488016	3.85533
3	10.26	150	928.5	932.7	930.6	4.2	3.5	31.7	0.619	27	71.96	11.5	1	92.1888	0.488016	2.34736
4	10.26	150	928.5	932.7	930.6	4.2	3.5	31.7	0.619	27	71.96	11.5	1	92.1888	0.488016	2.55721
5	10.26	150	928.5	932.7	930.6	4.2	3.5	31.7	0.619	27	71.96	11.5	1	92.1888	0.488016	2.12287
6	10.26	150	928.5	932.7	930.6	4.2	3.5	31.7	0.619	27	71.96	11.5	1	92.1888	0.488016	2.91346
7	10.26	150	928.5	932.7	930.6	4.2	3.5	31.7	0.619	27	71.96	11.5	1	92.1888	0.488016	1.85934
8	10.26	150	928.5	932.7	930.6	4.2	3.5	31.7	0.619	27	71.96	11.5	1	92.1888	0.488016	2.27416
9	10.26	150	928.5	932.7	930.6	4.2	3.5	31.7	0.619	27	71.96	11.5	1	92.1888	0.488016	1.48845
10	10.26	150	928.5	932.7	930.6	4.2	3.5	31.7	0.619	27	71.96	11.5	1	92.1888	0.488016	0.0976033
11	10.26	150	928.5	932.7	930.6	4.2	3.5	31.7	0.619	27	71.96	11.5	1	92.1888	0.488016	0.170806
12	10.26	150	928.5	932.7	930.6	4.2	3.5	31.7	0.619	27	71.96	11.5	1	92.1888	0.488016	0.30745
1	10.26	150	917.4	922.7	920.05	3.6	2	31.5	1.347	33	107.03	17	2	91.9137	0.505327	4.9421
2	10.26	150	917.4	922.7	920.05	3.6	2	31.5	1.347	33	107.03	17	2	91.9137	0.505327	5.7961
3	10.26	150	917.4	922.7	920.05	3.6	2	31.5	1.347	33	107.03	17	2	91.9137	0.505327	4.18916
4	10.26	150	917.4	922.7	920.05	3.6	2	31.5	1.347	33	107.03	17	2	91.9137	0.505327	3.06228
5	10.26	150	917.4	922.7	920.05	3.6	2	31.5	1.347	33	107.03	17	2	91.9137	0.505327	2.23355
6	10.26	150	917.4	922.7	920.05	3.6	2	31.5	1.347	33	107.03	17	2	91.9137	0.505327	2.75909
7	10.26	150	917.4	922.7	920.05	3.6	2	31.5	1.347	33	107.03	17	2	91.9137	0.505327	3.57266
8	10.26	150	917.4	922.7	920.05	3.6	2	31.5	1.347	33	107.03	17	2	91.9137	0.505327	4.0982
9	10.26	150	917.4	922.7	920.05	3.6	2	31.5	1.347	33	107.03	17	2	91.9137	0.505327	1.83434
10	10.26	150	917.4	922.7	920.05	3.6	2	31.5	1.347	33	107.03	17	2	91.9137	0.505327	1.06119
11	10.26	150	917.4	922.7	920.05	3.6	2	31.5	1.347	33	107.03	17	2	91.9137	0.505327	0.712511
12	10.26	150	917.4	922.7	920.05	3.6	2	31.5	1.347	33	107.03	17	2	91.9137	0.505327	0.697351
1	10.26	150	913.7	919	916.35	5.3	3.7	31.5	1.048	24	89	16.5	1	94.2977	0.389208	3.34719
2	10.26	150	913.7	919	916.35	5.3	3.7	31.5	1.048	24	89	16.5	1	94.2977	0.389208	1.69305
3	10.26	150	913.7	919	916.35	5.3	3.7	31.5	1.048	24	89	16.5	1	94.2977	0.389208	1.86041
4	10.26	150	913.7	919	916.35	5.3	3.7	31.5	1.048	24	89	16.5	1	94.2977	0.389208	1.26493
5	10.26	150	913.7	919	916.35	5.3	3.7	31.5	1.048	24	89	16.5	1	94.2977	0.389208	0.731711
6	10.26	150	913.7	919	916.35	5.3	3.7	31.5	1.048	24	89	16.5	1	94.2977	0.389208	0.291906
7	10.26	150	913.7	919	916.35	5.3	3.7	31.5	1.048	24	89	16.5	1	94.2977	0.389208	1.26103
8	10.26	150	913.7	919	916.35	5.3	3.7	31.5	1.048	24	89	16.5	1	94.2977	0.389208	0.443697
1	10.26	150	929.2	935	932.1	5.8	4.6	32.5	1.233	23	89	16.5	1	94.2977	0.569298	4.89596
2	10.26	150	929.2	935	932.1	5.8	4.6	32.5	1.233	23	89	16.5	1	94.2977	0.569298	2.47645
3	10.26	150	929.2	935	932.1	5.8	4.6	32.5	1.233	23	89	16.5	1	94.2977	0.569298	2.72124
4	10.26	150	929.2	935	932.1	5.8	4.6	32.5	1.233	23	89	16.5	1	94.2977	0.569298	1.85022
5	10.26	150	929.2	935	932.1	5.8	4.6	32.5	1.233	23	89	16.5	1	94.2977	0.569298	1.07028
6	10.26	150	929.2	935	932.1	5.8	4.6	32.5	1.233	23	89	16.5	1	94.2977	0.569298	0.426973
7	10.26	150	929.2	935	932.1	5.8	4.6	32.5	1.233	23	89	16.5	1	94.2977	0.569298	1.84452
8	10.26	150	929.2	935	932.1	5.8	4.6	32.5	1.233	23	89	16.5	1	94.2977	0.569298	0.648999
1	8.32	150	859.7	867.1	863.4	7.4	4.7	31	0.619	24	99.68	16.5	1	95.5969	0.225206	2.75652
2	8.32	150	859.7	867.1	863.4	7.4	4.7	31	0.619	24	99.68	16.5	1	95.5969	0.225206	2.85786
3	8.32	150	859.7	867.1	863.4	7.4	4.7	31	0.619	24	99.68	16.5	1	95.5969	0.225206	3.02226
4	8.32	150	859.7	867.1	863.4	7.4	4.7	31	0.619	24	99.68	16.5	1	95.5969	0.225206	2.87588
5	8.32	150	859.7	867.1	863.4	7.4	4.7	31	0.619	24	99.68	16.5	1	95.5969	0.225206	3.23396
6	8.32	150	859.7	867.1	863.4	7.4	4.7	31	0.619	24	99.68	16.5	1	95.5969	0.225206	3.46141
7	8.32	150	859.7	867.1	863.4	7.4	4.7	31	0.619	24	99.68	16.5	1	95.5969	0.225206	3.2272
8	8.32	150	859.7	867.1	863.4	7.4	4.7	31	0.619	24	99.68	16.5	1	95.5969	0.225206	3.41187
9	8.32	150	859.7	867.1	863.4	7.4	4.7	31	0.619	24	99.68	16.5	1	95.5969	0.225206	2.00884
10	8.32	150	859.7	867.1	863.4	7.4	4.7	31	0.619	24	99.68	16.5	1	95.5969	0.225206	1.95479
1	9.27	125	919.1	925.7	922.4	6.6	5.3	31.3	0.513	28	206.58	19	1	89.1484	1	0.39
2	9.27	125	919.1	925.7	922.4	6.6	5.3	31.3	0.513	28	206.58	19	1	89.1484	1	0.16
3	9.27	125	919.1	925.7	922.4	6.6	5.3	31.3	0.513	28	206.58	19	1	89.1484	1	1.14
4	9.27	125	919.1	925.7	922.4	6.6	5.3	31.3	0.513	28	206.58	19	1	89.1484	1	4.92
5	9.27	125	919.1	925.7	922.4	6.6	5.3	31.3	0.513	28	206.58	19	1	89.1484	1	4.7
6	9.27	125	919.1	925.7	922.4	6.6	5.3	31.3	0.513	28	206.58	19	1	89.1484	1	1.02
7	9.27	125	919.1	925.7	922.4	6.6	5.3	31.3	0.513	28	206.58	19	1	89.1484	1	0.53
1	8.08	125	885	892.5	888.75	7.5	6	31.1	1.003	0	134.92	22	1	88.2045	0.993725	0.10931
2	8.08	125	885	892.5	888.75	7.5	6	31.1	1.003	0	134.92	22	1	88.2045	0.993725	0.168933
3	8.08	125	885	892.5	888.75	7.5	6	31.1	1.003	0	134.92	22	1	88.2045	0.993725	0.0993725
1	8.08	125	985.5	995.3	990.4	7.9	7.1	30.7	0.841	32	226.16	37	2	96.5636	0.881577	1.4546
2	8.08	125	985.5	995.3	990.4	7.9	7.1	30.7	0.841	32	226.16	37	2	96.5636	0.881577	1.34
3	8.08	125	985.5	995.3	990.4	7.9	7.1	30.7	0.841	32	226.16	37	2	96.5636	0.881577	0.405526
4	8.08	125	985.5	995.3	990.4	7.9	7.1	30.7	0.841	32	226.16	37	2	96.5636	0.881577	0.114605
1	10.06	175	970.3	977.4	973.85	5.9	1.6	30.6	1.242	30	226.16	37	2	95.2727	0.396908	0.976394
2	10.06	175	970.3	977.4	973.85	5.9	1.6	30.6	1.242	30	226.16	37	2	95.2727	0.396908	1.01608
3	10.06	175	970.3	977.4	973.85	5.9	1.6	30.6	1.242	30	226.16	37	2	95.2727	0.396908	1.155
4	10.06	175	970.3	977.4	973.85	5.9	1.6	30.6	1.242	30	226.16	37	2	95.2727	0.396908	0.893043
5	10.06	175	970.3	977.4	973.85	5.9	1.6	30.6	1.242	30	226.16	37	2	95.2727	0.396908	0.702527
6	10.06	175	970.3	977.4	973.85	5.9	1.6	30.6	1.242	30	226.16	37	2	95.2727	0.396908	0.738249
1	10.26	150	929.7	936.5	933.1	5.9	4.2	31.7	0.552	29	179.4	29	2	89.1369	0.532917	1.4442
2	10.26	150	929.7	936.5	933.1	5.9	4.2	31.7	0.552	29	179.4	29	2	89.1369	0.532917	1.63072
3	10.26	150	929.7	936.5	933.1	5.9	4.2	31.7	0.552	29	179.4	29	2	89.1369	0.532917	0.927275
4	10.26	150	929.7	936.5	933.1	5.9	4.2	31.7	0.552	29	179.4	29	2	89.1369	0.532917	0.484954
1	10.26	150	851	855.4	853.2	4.4	3.6	32.3	0.708	20	57.48	9	1	92.4576	0.520078	2.11672
2	10.26	150	851	855.4	853.2	4.4	3.6	32.3	0.708	20	57.48	9	1	92.4576	0.520078	2.48597
3	10.26	150	851	855.4	853.2	4.4	3.6	32.3	0.708	20	57.48	9	1	92.4576	0.520078	0.988149
4	10.26	150	851	855.4	853.2	4.4	3.6	32.3	0.708	20	57.48	9	1	92.4576	0.520078	1.3418
5	10.26	150	851	855.4	853.2	4.4	3.6	32.3	0.708	20	57.48	9	1	92.4576	0.520078	1.77347
6	10.26	150	851	855.4	853.2	4.4	3.6	32.3	0.708	20	57.48	9	1	92.4576	0.520078	1.21698
7	10.26	150	851	855.4	853.2	4.4	3.6	32.3	0.708	20	57.48	9	1	92.4576	0.520078	1.12337
1	10.26	150	866.1	871.6	868.85	5.5	3.2	30.3	0.552	21	57.48	9	1	92.4576	0.360431	1.46695
2	10.26	150	866.1	871.6	868.85	5.5	3.2	30.3	0.552	21	57.48	9	1	92.4576	0.360431	1.72286
3	10.26	150	866.1	871.6	868.85	5.5	3.2	30.3	0.552	21	57.48	9	1	92.4576	0.360431	0.684819
4	10.26	150	866.1	871.6	868.85	5.5	3.2	30.3	0.552	21	57.48	9	1	92.4576	0.360431	0.929912
5	10.26	150	866.1	871.6	868.85	5.5	3.2	30.3	0.552	21	57.48	9	1	92.4576	0.360431	1.22907
6	10.26	150	866.1	871.6	868.85	5.5	3.2	30.3	0.552	21	57.48	9	1	92.4576	0.360431	0.843408
7	10.26	150	866.1	871.6	868.85	5.5	3.2	30.3	0.552	21	57.48	9	1	92.4576	0.360431	0.778531
1	9.61	175	963.7	968	965.85	4.3	3.1	31.5	0.883	18	82	15	1	87.6724	0.727928	2.86076
2	9.61	175	963.7	968	965.85	4.3	3.1	31.5	0.883	18	82	15	1	87.6724	0.727928	1.24476
3	9.61	175	963.7	968	965.85	4.3	3.1	31.5	0.883	18	82	15	1	87.6724	0.727928	0.676973
4	9.61	175	963.7	968	965.85	4.3	3.1	31.5	0.883	18	82	15	1	87.6724	0.727928	1.10645
5	9.61	175	963.7	968	965.85	4.3	3.1	31.5	0.883	18	82	15	1	87.6724	0.727928	1.2302
1	10.29	125	1029.3	1033.2	1031.25	3.9	2.4	31.3	0.672	32	76.66	12	1	93.6995	0.603864	0.62198
2	10.29	125	1029.3	1033.2	1031.25	3.9	2.4	31.3	0.672	32	76.66	12	1	93.6995	0.603864	0.259662
3	10.29	125	1029.3	1033.2	1031.25	3.9	2.4	31.3	0.672	32	76.66	12	1	93.6995	0.603864	0.477053
4	10.29	125	1029.3	1033.2	1031.25	3.9	2.4	31.3	0.672	32	76.66	12	1	93.6995	0.603864	0.314009
5	10.29	125	1029.3	1033.2	1031.25	3.9	2.4	31.3	0.672	32	76.66	12	1	93.6995	0.603864	0.724637
6	10.29	125	1029.3	1033.2	1031.25	3.9	2.4	31.3	0.672	32	76.66	12	1	93.6995	0.603864	1.5157
7	10.29	125	1029.3	1033.2	1031.25	3.9	2.4	31.3	0.672	32	76.66	12	1	93.6995	0.603864	1.82971
8	10.29	125	1029.3	1033.2	1031.25	3.9	2.4	31.3	0.672	32	76.66	12	1	93.6995	0.603864	1.10507
1	8.02	125	857.4	865.6	861.5	8.2	7.3	31	0.657	23	94.33	15	1	78.4422	0.613681	2.68792
2	8.02	125	857.4	865.6	861.5	8.2	7.3	31	0.657	23	94.33	15	1	78.4422	0.613681	2.12334
3	8.02	125	857.4	865.6	861.5	8.2	7.3	31	0.657	23	94.33	15	1	78.4422	0.613681	1.26418
4	8.02	125	857.4	865.6	861.5	8.2	7.3	31	0.657	23	94.33	15	1	78.4422	0.613681	0.282293
1	8.76	150	866.9	875.6	871.25	7.5	4.6	30.1	0.837	32	135	23	2	95.1275	0.541603	3.47167
2	8.76	150	866.9	875.6	871.25	7.5	4.6	30.1	0.837	32	135	23	2	95.1275	0.541603	3.82913
3	8.76	150	866.9	875.6	871.25	7.5	4.6	30.1	0.837	32	135	23	2	95.1275	0.541603	2.07434
4	8.76	150	866.9	875.6	871.25	7.5	4.6	30.1	0.837	32	135	23	2	95.1275	0.541603	1.44608
5	8.76	150	866.9	875.6	871.25	7.5	4.6	30.1	0.837	32	135	23	2	95.1275	0.541603	2.27473
6	8.76	150	866.9	875.6	871.25	7.5	4.6	30.1	0.837	32	135	23	2	95.1275	0.541603	1.78187
7	8.76	150	866.9	875.6	871.25	7.5	4.6	30.1	0.837	32	135	23	2	95.1275	0.541603	0.211225
8	8.76	150	866.9	875.6	871.25	7.5	4.6	30.1	0.837	32	135	23	2	95.1275	0.541603	0.178729
1	9.51	150	880	884	882	4	3.6	32.5	0.903	29	70	12	1	96.0949	0.697237	3.38857
2	9.51	150	880	884	882	4	3.6	32.5	0.903	29	70	12	1	96.0949	0.697237	5.52212
3	9.51	150	880	884	882	4	3.6	32.5	0.903	29	70	12	1	96.0949	0.697237	6.74229
4	9.51	150	880	884	882	4	3.6	32.5	0.903	29	70	12	1	96.0949	0.697237	9.6149
5	9.51	150	880	884	882	4	3.6	32.5	0.903	29	70	12	1	96.0949	0.697237	5.56396
6	9.51	150	880	884	882	4	3.6	32.5	0.903	29	70	12	1	96.0949	0.697237	6.86779
7	9.51	150	880	884	882	4	3.6	32.5	0.903	29	70	12	1	96.0949	0.697237	3.73719
8	9.51	150	880	884	882	4	3.6	32.5	0.903	29	70	12	1	96.0949	0.697237	2.0708
9	9.51	150	880	884	882	4	3.6	32.5	0.903	29	70	12	1	96.0949	0.697237	2.02199
1	9.3	150	859.7	865.7	862.7	5.3	3.4	30.6	1.005	32	112.16	17	2	91.4933	0.131117	1.09876
2	9.3	150	859.7	865.7	862.7	5.3	3.4	30.6	1.005	32	112.16	17	2	91.4933	0.131117	1.02403
3	9.3	150	859.7	865.7	862.7	5.3	3.4	30.6	1.005	32	112.16	17	2	91.4933	0.131117	1.00174
4	9.3	150	859.7	865.7	862.7	5.3	3.4	30.6	1.005	32	112.16	17	2	91.4933	0.131117	0.475956
5	9.3	150	859.7	865.7	862.7	5.3	3.4	30.6	1.005	32	112.16	17	2	91.4933	0.131117	0.542826
6	9.3	150	859.7	865.7	862.7	5.3	3.4	30.6	1.005	32	112.16	17	2	91.4933	0.131117	0.331727
7	9.3	150	859.7	865.7	862.7	5.3	3.4	30.6	1.005	32	112.16	17	2	91.4933	0.131117	0.481201
8	9.3	150	859.7	865.7	862.7	5.3	3.4	30.6	1.005	32	112.16	17	2	91.4933	0.131117	0.237323
9	9.3	150	859.7	865.7	862.7	5.3	3.4	30.6	1.005	32	112.16	17	2	91.4933	0.131117	0.0183564
10	9.3	150	859.7	865.7	862.7	5.3	3.4	30.6	1.005	32	112.16	17	2	91.4933	0.131117	0.125873
11	9.3	150	859.7	865.7	862.7	5.3	3.4	30.6	1.005	32	112.16	17	2	91.4933	0.131117	0.131117
12	9.3	150	859.7	865.7	862.7	5.3	3.4	30.6	1.005	32	112.16	17	2	91.4933	0.131117	0.00131117
1	9.3	150	873.1	885	879.05	10.5	6.7	32.8	3.318	31	112.16	17	2	91.4933	0.853035	7.14843
2	9.3	150	873.1	885	879.05	10.5	6.7	32.8	3.318	31	112.16	17	2	91.4933	0.853035	6.6622
3	9.3	150	873.1	885	879.05	10.5	6.7	32.8	3.318	31	112.16	17	2	91.4933	0.853035	6.51719
4	9.3	150	873.1	885	879.05	10.5	6.7	32.8	3.318	31	112.16	17	2	91.4933	0.853035	3.09652
5	9.3	150	873.1	885	879.05	10.5	6.7	32.8	3.318	31	112.16	17	2	91.4933	0.853035	3.53156
6	9.3	150	873.1	885	879.05	10.5	6.7	32.8	3.318	31	112.16	17	2	91.4933	0.853035	2.15818
7	9.3	150	873.1	885	879.05	10.5	6.7	32.8	3.318	31	112.16	17	2	91.4933	0.853035	3.13064
8	9.3	150	873.1	885	879.05	10.5	6.7	32.8	3.318	31	112.16	17	2	91.4933	0.853035	1.54399
9	9.3	150	873.1	885	879.05	10.5	6.7	32.8	3.318	31	112.16	17	2	91.4933	0.853035	0.119425
10	9.3	150	873.1	885	879.05	10.5	6.7	32.8	3.318	31	112.16	17	2	91.4933	0.853035	0.818913
11	9.3	150	873.1	885	879.05	10.5	6.7	32.8	3.318	31	112.16	17	2	91.4933	0.853035	0.853035
12	9.3	150	873.1	885	879.05	10.5	6.7	32.8	3.318	31	112.16	17	2	91.4933	0.853035	0.00853035
1	8.08	125	968.3	977.6	972.95	9.3	8.2	30.3	0.865	24	105.76	17	1	93.4448	0.897371	0.143579
2	8.08	125	968.3	977.6	972.95	9.3	8.2	30.3	0.865	24	105.76	17	1	93.4448	0.897371	0.771739
3	8.08	125	968.3	977.6	972.95	9.3	8.2	30.3	0.865	24	105.76	17	1	93.4448	0.897371	4.04714
4	8.08	125	968.3	977.6	972.95	9.3	8.2	30.3	0.865	24	105.76	17	1	93.4448	0.897371	2.46777
5	8.08	125	968.3	977.6	972.95	9.3	8.2	30.3	0.865	24	105.76	17	1	93.4448	0.897371	2.71903
6	8.08	125	968.3	977.6	972.95	9.3	8.2	30.3	0.865	24	105.76	17	1	93.4448	0.897371	2.01908
7	8.08	125	968.3	977.6	972.95	9.3	8.2	30.3	0.865	24	105.76	17	1	93.4448	0.897371	1.38195
8	8.08	125	968.3	977.6	972.95	9.3	8.2	30.3	0.865	24	105.76	17	1	93.4448	0.897371	0.439712
2	8.75	150	854.4	865.7	860.05	9.1	5.5	31.7	1.484	28	175.84	29	2	90.2917	0.571433	11.4744
3	8.75	150	854.4	865.7	860.05	9.1	5.5	31.7	1.484	28	175.84	29	2	90.2917	0.571433	6.8229
4	8.75	150	854.4	865.7	860.05	9.1	5.5	31.7	1.484	28	175.84	29	2	90.2917	0.571433	4.98861
5	8.75	150	854.4	865.7	860.05	9.1	5.5	31.7	1.484	28	175.84	29	2	90.2917	0.571433	2.44573
6	8.75	150	854.4	865.7	860.05	9.1	5.5	31.7	1.484	28	175.84	29	2	90.2917	0.571433	2.08573
7	8.75	150	854.4	865.7	860.05	9.1	5.5	31.7	1.484	28	175.84	29	2	90.2917	0.571433	2.56002
8	8.75	150	854.4	865.7	860.05	9.1	5.5	31.7	1.484	28	175.84	29	2	90.2917	0.571433	3.02288
9	8.75	150	854.4	865.7	860.05	9.1	5.5	31.7	1.484	28	175.84	29	2	90.2917	0.571433	1.85716
10	8.75	150	854.4	865.7	860.05	9.1	5.5	31.7	1.484	28	175.84	29	2	90.2917	0.571433	1.88573
11	8.75	150	854.4	865.7	860.05	9.1	5.5	31.7	1.484	28	175.84	29	2	90.2917	0.571433	1.06858
12	8.75	150	854.4	865.7	860.05	9.1	5.5	31.7	1.484	28	175.84	29	2	90.2917	0.571433	1.06858
1	8.76	150	849.6	858.1	853.85	7.2	5.4	30.6	0.687	32	165	29	2	84.4888	0.953064	5.62308
2	8.76	150	849.6	858.1	853.85	7.2	5.4	30.6	0.687	32	165	29	2	84.4888	0.953064	5.4134
3	8.76	150	849.6	858.1	853.85	7.2	5.4	30.6	0.687	32	165	29	2	84.4888	0.953064	4.90828
4	8.76	150	849.6	858.1	853.85	7.2	5.4	30.6	0.687	32	165	29	2	84.4888	0.953064	4.7272
5	8.76	150	849.6	858.1	853.85	7.2	5.4	30.6	0.687	32	165	29	2	84.4888	0.953064	2.23017
6	8.76	150	849.6	858.1	853.85	7.2	5.4	30.6	0.687	32	165	29	2	84.4888	0.953064	2.97356
7	8.76	150	849.6	858.1	853.85	7.2	5.4	30.6	0.687	32	165	29	2	84.4888	0.953064	3.86944
8	8.76	150	849.6	858.1	853.85	7.2	5.4	30.6	0.687	32	165	29	2	84.4888	0.953064	4.09817
1	8.76	150	858.8	864.9	861.85	6.1	3.7	30	0.922	31.6	88.12	14	1	97.1009	0.781535	4.00146
2	8.76	150	858.8	864.9	861.85	6.1	3.7	30	0.922	31.6	88.12	14	1	97.1009	0.781535	3.39186
3	8.76	150	858.8	864.9	861.85	6.1	3.7	30	0.922	31.6	88.12	14	1	97.1009	0.781535	4.86896
4	8.76	150	858.8	864.9	861.85	6.1	3.7	30	0.922	31.6	88.12	14	1	97.1009	0.781535	2.55562
5	8.76	150	858.8	864.9	861.85	6.1	3.7	30	0.922	31.6	88.12	14	1	97.1009	0.781535	4.03272
6	8.76	150	858.8	864.9	861.85	6.1	3.7	30	0.922	31.6	88.12	14	1	97.1009	0.781535	2.19611
7	8.76	150	858.8	864.9	861.85	6.1	3.7	30	0.922	31.6	88.12	14	1	97.1009	0.781535	0.640859
8	8.76	150	858.8	864.9	861.85	6.1	3.7	30	0.922	31.6	88.12	14	1	97.1009	0.781535	1.89131
1	8.08	125	860.1	870.1	865.1	9.7	7.1	20	0.766	31.4	122.12	17	2	90.815	0.728781	1.80738
2	8.08	125	860.1	870.1	865.1	9.7	7.1	20	0.766	31.4	122.12	17	2	90.815	0.728781	2.21549
3	8.08	125	860.1	870.1	865.1	9.7	7.1	20	0.766	31.4	122.12	17	2	90.815	0.728781	3.09732
4	8.08	125	860.1	870.1	865.1	9.7	7.1	20	0.766	31.4	122.12	17	2	90.815	0.728781	1.48671
5	8.08	125	860.1	870.1	865.1	9.7	7.1	20	0.766	31.4	122.12	17	2	90.815	0.728781	1.20249
1	9.61	175	894.6	897.9	896.25	3.3	2.8	30.5	0.871	32	117.54	19	1	93.5259	0.851893	1.84861
2	9.61	175	894.6	897.9	896.25	3.3	2.8	30.5	0.871	32	117.54	19	1	93.5259	0.851893	1.37155
3	9.61	175	894.6	897.9	896.25	3.3	2.8	30.5	0.871	32	117.54	19	1	93.5259	0.851893	4.5917
4	9.61	175	894.6	897.9	896.25	3.3	2.8	30.5	0.871	32	117.54	19	1	93.5259	0.851893	0.613363
5	9.61	175	894.6	897.9	896.25	3.3	2.8	30.5	0.871	32	117.54	19	1	93.5259	0.851893	1.67823
6	9.61	175	894.6	897.9	896.25	3.3	2.8	30.5	0.871	32	117.54	19	1	93.5259	0.851893	0.110746
7	9.61	175	894.6	897.9	896.25	3.3	2.8	30.5	0.871	32	117.54	19	1	93.5259	0.851893	0.102227
1	9.61	175	1025.6	1027.6	1026.6	2	1.1	31.6	0.859	28	144	24	1	93.0577	0.223333	1.4807
2	9.61	175	1025.6	1027.6	1026.6	2	1.1	31.6	0.859	28	144	24	1	93.0577	0.223333	1.53207
3	9.61	175	1025.6	1027.6	1026.6	2	1.1	31.6	0.859	28	144	24	1	93.0577	0.223333	0.741466
4	9.61	175	1025.6	1027.6	1026.6	2	1.1	31.6	0.859	28	144	24	1	93.0577	0.223333	0.209933
5	9.61	175	1025.6	1027.6	1026.6	2	1.1	31.6	0.859	28	144	24	1	93.0577	0.223333	0.263533
6	9.61	175	1025.6	1027.6	1026.6	2	1.1	31.6	0.859	28	144	24	1	93.0577	0.223333	0.491333
7	9.61	175	1025.6	1027.6	1026.6	2	1.1	31.6	0.859	28	144	24	1	93.0577	0.223333	0.0424333
1	9.61	175	1033.2	1034	1033.6	0.8	0.5	28.5	0.147	29	151.8	25	1	93.0577	0.0173722	0.115178
2	9.61	175	1033.2	1034	1033.6	0.8	0.5	28.5	0.147	29	151.8	25	1	93.0577	0.0173722	0.119173
3	9.61	175	1033.2	1034	1033.6	0.8	0.5	28.5	0.147	29	151.8	25	1	93.0577	0.0173722	0.0576757
4	9.61	175	1033.2	1034	1033.6	0.8	0.5	28.5	0.147	29	151.8	25	1	93.0577	0.0173722	0.0163299
5	9.61	175	1033.2	1034	1033.6	0.8	0.5	28.5	0.147	29	151.8	25	1	93.0577	0.0173722	0.0204992
6	9.61	175	1033.2	1034	1033.6	0.8	0.5	28.5	0.147	29	151.8	25	1	93.0577	0.0173722	0.0382188
7	9.61	175	1033.2	1034	1033.6	0.8	0.5	28.5	0.147	29	151.8	25	1	93.0577	0.0173722	0.00330072
1	9.61	175	1038.2	1039.8	1039	1.6	1.3	30.7	0.635	36	151.8	25	1	93.0577	0.195112	1.29359
2	9.61	175	1038.2	1039.8	1039	1.6	1.3	30.7	0.635	36	151.8	25	1	93.0577	0.195112	1.33847
3	9.61	175	1038.2	1039.8	1039	1.6	1.3	30.7	0.635	36	151.8	25	1	93.0577	0.195112	0.647772
4	9.61	175	1038.2	1039.8	1039	1.6	1.3	30.7	0.635	36	151.8	25	1	93.0577	0.195112	0.183405
5	9.61	175	1038.2	1039.8	1039	1.6	1.3	30.7	0.635	36	151.8	25	1	93.0577	0.195112	0.230232
6	9.61	175	1038.2	1039.8	1039	1.6	1.3	30.7	0.635	36	151.8	25	1	93.0577	0.195112	0.429247
7	9.61	175	1038.2	1039.8	1039	1.6	1.3	30.7	0.635	36	151.8	25	1	93.0577	0.195112	0.0370713
1	9.61	106	1044	1049.7	1046.85	5.1	3.5	31.6	0.682	33	99	16	1	93.0577	0.564183	3.74053
2	9.61	106	1044	1049.7	1046.85	5.1	3.5	31.6	0.682	33	99	16	1	93.0577	0.564183	3.87029
3	9.61	106	1044	1049.7	1046.85	5.1	3.5	31.6	0.682	33	99	16	1	93.0577	0.564183	1.87309
4	9.61	106	1044	1049.7	1046.85	5.1	3.5	31.6	0.682	33	99	16	1	93.0577	0.564183	0.530332
5	9.61	106	1044	1049.7	1046.85	5.1	3.5	31.6	0.682	33	99	16	1	93.0577	0.564183	0.665735
6	9.61	106	1044	1049.7	1046.85	5.1	3.5	31.6	0.682	33	99	16	1	93.0577	0.564183	1.2412
7	9.61	106	1044	1049.7	1046.85	5.1	3.5	31.6	0.682	33	99	16	1	93.0577	0.564183	0.107195
1	8.08	125	892.7	900.1	896.4	6.9	5.9	29	0.551	30.1	199.42	33	2	94.496	0.695276	0.285063
2	8.08	125	892.7	900.1	896.4	6.9	5.9	29	0.551	30.1	199.42	33	2	94.496	0.695276	0.243346
3	8.08	125	892.7	900.1	896.4	6.9	5.9	29	0.551	30.1	199.42	33	2	94.496	0.695276	1.31407
1	8.76	150	846.1	858.7	852.4	12.2	9.3	24	0.858	31.5	55.68	9	1	83.7445	0.884732	1.3271
2	8.76	150	846.1	858.7	852.4	12.2	9.3	24	0.858	31.5	55.68	9	1	83.7445	0.884732	0.72548
3	8.76	150	846.1	858.7	852.4	12.2	9.3	24	0.858	31.5	55.68	9	1	83.7445	0.884732	1.67214
4	8.76	150	846.1	858.7	852.4	12.2	9.3	24	0.858	31.5	55.68	9	1	83.7445	0.884732	2.07912
1	7.79	150	873.9	885.6	879.75	11.7	9.8	31.6	1.074	21	75.8	12	1	94.947	0.666755	2.80704
2	7.79	150	873.9	885.6	879.75	11.7	9.8	31.6	1.074	21	75.8	12	1	94.947	0.666755	3.60715
3	7.79	150	873.9	885.6	879.75	11.7	9.8	31.6	1.074	21	75.8	12	1	94.947	0.666755	4.42059
4	7.79	150	873.9	885.6	879.75	11.7	9.8	31.6	1.074	21	75.8	12	1	94.947	0.666755	2.44032
5	7.79	150	873.9	885.6	879.75	11.7	9.8	31.6	1.074	21	75.8	12	1	94.947	0.666755	2.30031
6	7.79	150	873.9	885.6	879.75	11.7	9.8	31.6	1.074	21	75.8	12	1	94.947	0.666755	3.62715
7	7.79	150	873.9	885.6	879.75	11.7	9.8	31.6	1.074	21	75.8	12	1	94.947	0.666755	3.96719
8	7.79	150	873.9	885.6	879.75	11.7	9.8	31.6	1.074	21	75.8	12	1	94.947	0.666755	3.44713
9	7.79	150	873.9	885.6	879.75	11.7	9.8	31.6	1.074	21	75.8	12	1	94.947	0.666755	3.04707
10	7.79	150	873.9	885.6	879.75	11.7	9.8	31.6	1.074	21	75.8	12	1	94.947	0.666755	1.96026
11	7.79	150	873.9	885.6	879.75	11.7	9.8	31.6	1.074	21	75.8	12	1	94.947	0.666755	2.65369
1	8.32	106	881.7	890.3	886	8.1	5.7	26	0.659	30.6	110.4	17	2	82.4161	0.843828	2.81839
2	8.32	106	881.7	890.3	886	8.1	5.7	26	0.659	30.6	110.4	17	2	82.4161	0.843828	12.6068
3	8.32	106	881.7	890.3	886	8.1	5.7	26	0.659	30.6	110.4	17	2	82.4161	0.843828	13.3494
4	8.32	106	881.7	890.3	886	8.1	5.7	26	0.659	30.6	110.4	17	2	82.4161	0.843828	13.2819
5	8.32	106	881.7	890.3	886	8.1	5.7	26	0.659	30.6	110.4	17	2	82.4161	0.843828	11.552
6	8.32	106	881.7	890.3	886	8.1	5.7	26	0.659	30.6	110.4	17	2	82.4161	0.843828	9.434
7	8.32	106	881.7	890.3	886	8.1	5.7	26	0.659	30.6	110.4	17	2	82.4161	0.843828	10.8685
8	8.32	106	881.7	890.3	886	8.1	5.7	26	0.659	30.6	110.4	17	2	82.4161	0.843828	10.9107
9	8.32	106	881.7	890.3	886	8.1	5.7	26	0.659	30.6	110.4	17	2	82.4161	0.843828	8.2442
10	8.32	106	881.7	890.3	886	8.1	5.7	26	0.659	30.6	110.4	17	2	82.4161	0.843828	7.04596
11	8.32	106	881.7	890.3	886	8.1	5.7	26	0.659	30.6	110.4	17	2	82.4161	0.843828	9.17241
12	8.32	106	881.7	890.3	886	8.1	5.7	26	0.659	30.6	110.4	17	2	82.4161	0.843828	9.2146
1	10.46	125	998.4	1004.9	1001.65	5.6	4.9	30.6	0.634	31	77.36	12	1	94.1693	0.504728	1.10535
2	10.46	125	998.4	1004.9	1001.65	5.6	4.9	30.6	0.634	31	77.36	12	1	94.1693	0.504728	0.782328
3	10.46	125	998.4	1004.9	1001.65	5.6	4.9	30.6	0.634	31	77.36	12	1	94.1693	0.504728	0.817659
4	10.46	125	998.4	1004.9	1001.65	5.6	4.9	30.6	0.634	31	77.36	12	1	94.1693	0.504728	0.807565
5	10.46	125	998.4	1004.9	1001.65	5.6	4.9	30.6	0.634	31	77.36	12	1	94.1693	0.504728	0.146371
6	10.46	125	998.4	1004.9	1001.65	5.6	4.9	30.6	0.634	31	77.36	12	1	94.1693	0.504728	0.0656146
7	10.46	125	998.4	1004.9	1001.65	5.6	4.9	30.6	0.634	31	77.36	12	1	94.1693	0.504728	0.38864
8	10.46	125	998.4	1004.9	1001.65	5.6	4.9	30.6	0.634	31	77.36	12	1	94.1693	0.504728	0.38864
9	10.46	125	998.4	1004.9	1001.65	5.6	4.9	30.6	0.634	31	77.36	12	1	94.1693	0.504728	0.282648
1	9.32	175	912	914.8	913.4	2.8	1.8	30.1	1.009	26	94.2	15	1	97.577	0.276123	1.05203
2	9.32	175	912	914.8	913.4	2.8	1.8	30.1	1.009	26	94.2	15	1	97.577	0.276123	1.07136
3	9.32	175	912	914.8	913.4	2.8	1.8	30.1	1.009	26	94.2	15	1	97.577	0.276123	0.698592
4	9.32	175	912	914.8	913.4	2.8	1.8	30.1	1.009	26	94.2	15	1	97.577	0.276123	0.7621
5	9.32	175	912	914.8	913.4	2.8	1.8	30.1	1.009	26	94.2	15	1	97.577	0.276123	0.991282
6	9.32	175	912	914.8	913.4	2.8	1.8	30.1	1.009	26	94.2	15	1	97.577	0.276123	0.955386
7	9.32	175	912	914.8	913.4	2.8	1.8	30.1	1.009	26	94.2	15	1	97.577	0.276123	0.654412
8	9.32	175	912	914.8	913.4	2.8	1.8	30.1	1.009	26	94.2	15	1	97.577	0.276123	0.822847
9	9.32	175	912	914.8	913.4	2.8	1.8	30.1	1.009	26	94.2	15	1	97.577	0.276123	0.930535
10	9.32	175	912	914.8	913.4	2.8	1.8	30.1	1.009	26	94.2	15	1	97.577	0.276123	0.339631
11	9.32	175	912	914.8	913.4	2.8	1.8	30.1	1.009	26	94.2	15	1	97.577	0.276123	0.33687
12	9.32	175	912	914.8	913.4	2.8	1.8	30.1	1.009	26	94.2	15	1	97.577	0.276123	0.386572
1	8.63	125	954.8	962.7	958.75	5.9	2.3	31.6	0.788	34	147.42	23	2	94.2456	0.990004	0.366301
2	8.63	125	954.8	962.7	958.75	5.9	2.3	31.6	0.788	34	147.42	23	2	94.2456	0.990004	0.584102
1	9.17	150	858.6	868.6	863.6	8.9	4.8	32.4	0.927	33	143.6	23	2	90.3478	0.386579	8.0911
2	9.17	150	858.6	868.6	863.6	8.9	4.8	32.4	0.927	33	143.6	23	2	90.3478	0.386579	6.60277
3	9.17	150	858.6	868.6	863.6	8.9	4.8	32.4	0.927	33	143.6	23	2	90.3478	0.386579	6.25485
4	9.17	150	858.6	868.6	863.6	8.9	4.8	32.4	0.927	33	143.6	23	2	90.3478	0.386579	3.08103
5	9.17	150	858.6	868.6	863.6	8.9	4.8	32.4	0.927	33	143.6	23	2	90.3478	0.386579	1.56951
6	9.17	150	858.6	868.6	863.6	8.9	4.8	32.4	0.927	33	143.6	23	2	90.3478	0.386579	1.20999
7	9.17	150	858.6	868.6	863.6	8.9	4.8	32.4	0.927	33	143.6	23	2	90.3478	0.386579	3.11969
8	9.17	150	858.6	868.6	863.6	8.9	4.8	32.4	0.927	33	143.6	23	2	90.3478	0.386579	2.40452
9	9.17	150	858.6	868.6	863.6	8.9	4.8	32.4	0.927	33	143.6	23	2	90.3478	0.386579	1.4574
10	9.17	150	858.6	868.6	863.6	8.9	4.8	32.4	0.927	33	143.6	23	2	90.3478	0.386579	0.707439
11	9.17	150	858.6	868.6	863.6	8.9	4.8	32.4	0.927	33	143.6	23	2	90.3478	0.386579	1.65842
1	8.02	125	870	877.1	873.55	6.9	3.9	29	0.323	29	166.52	27	2	91.6089	0.282286	0.801691
2	8.02	125	870	877.1	873.55	6.9	3.9	29	0.323	29	166.52	27	2	91.6089	0.282286	1.0247
3	8.02	125	870	877.1	873.55	6.9	3.9	29	0.323	29	166.52	27	2	91.6089	0.282286	1.00494
4	8.02	125	870	877.1	873.55	6.9	3.9	29	0.323	29	166.52	27	2	91.6089	0.282286	1.23077
5	8.02	125	870	877.1	873.55	6.9	3.9	29	0.323	29	166.52	27	2	91.6089	0.282286	1.48765
6	8.02	125	870	877.1	873.55	6.9	3.9	29	0.323	29	166.52	27	2	91.6089	0.282286	0.84968
7	8.02	125	870	877.1	873.55	6.9	3.9	29	0.323	29	166.52	27	2	91.6089	0.282286	0.917429
8	8.02	125	870	877.1	873.55	6.9	3.9	29	0.323	29	166.52	27	2	91.6089	0.282286	0.942834
9	8.02	125	870	877.1	873.55	6.9	3.9	29	0.323	29	166.52	27	2	91.6089	0.282286	1.12632
10	8.02	125	870	877.1	873.55	6.9	3.9	29	0.323	29	166.52	27	2	91.6089	0.282286	0.923074
11	8.02	125	870	877.1	873.55	6.9	3.9	29	0.323	29	166.52	27	2	91.6089	0.282286	0.471417
12	8.02	125	870	877.1	873.55	6.9	3.9	29	0.323	29	166.52	27	2	91.6089	0.282286	0.245589
1	8.08	125	843.3	844.9	844.1	1.6	0.8	25	0.451	28.3	114.24	19	1	0	0.204419	0.648009
2	8.08	125	843.3	844.9	844.1	1.6	0.8	25	0.451	28.3	114.24	19	1	0	0.204419	0.731821
3	8.08	125	843.3	844.9	844.1	1.6	0.8	25	0.451	28.3	114.24	19	1	0	0.204419	0.701158
4	8.08	125	843.3	844.9	844.1	1.6	0.8	25	0.451	28.3	114.24	19	1	0	0.204419	0.525358
5	8.08	125	843.3	844.9	844.1	1.6	0.8	25	0.451	28.3	114.24	19	1	0	0.204419	0.363866
6	8.08	125	843.3	844.9	844.1	1.6	0.8	25	0.451	28.3	114.24	19	1	0	0.204419	0.239171
7	8.08	125	843.3	844.9	844.1	1.6	0.8	25	0.451	28.3	114.24	19	1	0	0.204419	0.241215
8	8.08	125	843.3	844.9	844.1	1.6	0.8	25	0.451	28.3	114.24	19	1	0	0.204419	0.261657
9	8.08	125	843.3	844.9	844.1	1.6	0.8	25	0.451	28.3	114.24	19	1	0	0.204419	0.239171
10	8.08	125	843.3	844.9	844.1	1.6	0.8	25	0.451	28.3	114.24	19	1	0	0.204419	0.206463
1	8.08	125	846.8	850.7	848.75	3.5	2.4	26	0.501	30.3	114.24	19	1	0	0.681246	2.15955
2	8.08	125	846.8	850.7	848.75	3.5	2.4	26	0.501	30.3	114.24	19	1	0	0.681246	2.43886
3	8.08	125	846.8	850.7	848.75	3.5	2.4	26	0.501	30.3	114.24	19	1	0	0.681246	2.33668
4	8.08	125	846.8	850.7	848.75	3.5	2.4	26	0.501	30.3	114.24	19	1	0	0.681246	1.7508
5	8.08	125	846.8	850.7	848.75	3.5	2.4	26	0.501	30.3	114.24	19	1	0	0.681246	1.21262
6	8.08	125	846.8	850.7	848.75	3.5	2.4	26	0.501	30.3	114.24	19	1	0	0.681246	0.797058
7	8.08	125	846.8	850.7	848.75	3.5	2.4	26	0.501	30.3	114.24	19	1	0	0.681246	0.803871
8	8.08	125	846.8	850.7	848.75	3.5	2.4	26	0.501	30.3	114.24	19	1	0	0.681246	0.871995
9	8.08	125	846.8	850.7	848.75	3.5	2.4	26	0.501	30.3	114.24	19	1	0	0.681246	0.797058
10	8.08	125	846.8	850.7	848.75	3.5	2.4	26	0.501	30.3	114.24	19	1	0	0.681246	0.688059
1	8.08	125	851.8	853.8	852.8	1.6	1.3	31	0.118	29.3	222.19	37	2	0	0.0869122	0.275512
2	8.08	125	851.8	853.8	852.8	1.6	1.3	31	0.118	29.3	222.19	37	2	0	0.0869122	0.311146
3	8.08	125	851.8	853.8	852.8	1.6	1.3	31	0.118	29.3	222.19	37	2	0	0.0869122	0.298109
4	8.08	125	851.8	853.8	852.8	1.6	1.3	31	0.118	29.3	222.19	37	2	0	0.0869122	0.223364
5	8.08	125	851.8	853.8	852.8	1.6	1.3	31	0.118	29.3	222.19	37	2	0	0.0869122	0.154704
6	8.08	125	851.8	853.8	852.8	1.6	1.3	31	0.118	29.3	222.19	37	2	0	0.0869122	0.101687
7	8.08	125	851.8	853.8	852.8	1.6	1.3	31	0.118	29.3	222.19	37	2	0	0.0869122	0.102556
8	8.08	125	851.8	853.8	852.8	1.6	1.3	31	0.118	29.3	222.19	37	2	0	0.0869122	0.111248
9	8.08	125	851.8	853.8	852.8	1.6	1.3	31	0.118	29.3	222.19	37	2	0	0.0869122	0.101687
10	8.08	125	851.8	853.8	852.8	1.6	1.3	31	0.118	29.3	222.19	37	2	0	0.0869122	0.0877813
1	8.08	125	855.7	856.1	855.9	0.4	0.4	27	0.121	27.7	114.24	19	1	0	0.0274221	0.086928
2	8.08	125	855.7	856.1	855.9	0.4	0.4	27	0.121	27.7	114.24	19	1	0	0.0274221	0.0981711
3	8.08	125	855.7	856.1	855.9	0.4	0.4	27	0.121	27.7	114.24	19	1	0	0.0274221	0.0940578
4	8.08	125	855.7	856.1	855.9	0.4	0.4	27	0.121	27.7	114.24	19	1	0	0.0274221	0.0704748
5	8.08	125	855.7	856.1	855.9	0.4	0.4	27	0.121	27.7	114.24	19	1	0	0.0274221	0.0488113
6	8.08	125	855.7	856.1	855.9	0.4	0.4	27	0.121	27.7	114.24	19	1	0	0.0274221	0.0320839
7	8.08	125	855.7	856.1	855.9	0.4	0.4	27	0.121	27.7	114.24	19	1	0	0.0274221	0.0323581
8	8.08	125	855.7	856.1	855.9	0.4	0.4	27	0.121	27.7	114.24	19	1	0	0.0274221	0.0351003
9	8.08	125	855.7	856.1	855.9	0.4	0.4	27	0.121	27.7	114.24	19	1	0	0.0274221	0.0320839
10	8.08	125	855.7	856.1	855.9	0.4	0.4	27	0.121	27.7	114.24	19	1	0	0.0274221	0.0276963
1	10.96	125	1033.3	1041.2	1037.25	7.6	6.4	31.6	0.819	29	170.6	27	2	92.033	0.997526	1.36661
2	10.96	125	1033.3	1041.2	1037.25	7.6	6.4	31.6	0.819	29	170.6	27	2	92.033	0.997526	2.03495
3	10.96	125	1033.3	1041.2	1037.25	7.6	6.4	31.6	0.819	29	170.6	27	2	92.033	0.997526	2.48384
4	10.96	125	1033.3	1041.2	1037.25	7.6	6.4	31.6	0.819	29	170.6	27	2	92.033	0.997526	4.43899
5	10.96	125	1033.3	1041.2	1037.25	7.6	6.4	31.6	0.819	29	170.6	27	2	92.033	0.997526	7.37172
6	10.96	125	1033.3	1041.2	1037.25	7.6	6.4	31.6	0.819	29	170.6	27	2	92.033	0.997526	10.1947
7	10.96	125	1033.3	1041.2	1037.25	7.6	6.4	31.6	0.819	29	170.6	27	2	92.033	0.997526	10.6835
8	10.96	125	1033.3	1041.2	1037.25	7.6	6.4	31.6	0.819	29	170.6	27	2	92.033	0.997526	9.676
9	10.96	125	1033.3	1041.2	1037.25	7.6	6.4	31.6	0.819	29	170.6	27	2	92.033	0.997526	6.12481
10	10.96	125	1033.3	1041.2	1037.25	7.6	6.4	31.6	0.819	29	170.6	27	2	92.033	0.997526	4.23949
1	8.76	150	853.1	866.2	859.65	11.1	7	30.8	0.915	34	145.17	23	2	86.0105	1	8.53
2	8.76	150	853.1	866.2	859.65	11.1	7	30.8	0.915	34	145.17	23	2	86.0105	1	11.29
3	8.76	150	853.1	866.2	859.65	11.1	7	30.8	0.915	34	145.17	23	2	86.0105	1	5.76
4	8.76	150	853.1	866.2	859.65	11.1	7	30.8	0.915	34	145.17	23	2	86.0105	1	4.46
5	8.76	150	853.1	866.2	859.65	11.1	7	30.8	0.915	34	145.17	23	2	86.0105	1	2.27
6	8.76	150	853.1	866.2	859.65	11.1	7	30.8	0.915	34	145.17	23	2	86.0105	1	0.73
7	8.76	150	853.1	866.2	859.65	11.1	7	30.8	0.915	34	145.17	23	2	86.0105	1	2.65
8	8.76	150	853.1	866.2	859.65	11.1	7	30.8	0.915	34	145.17	23	2	86.0105	1	1.71
9	8.76	150	853.1	866.2	859.65	11.1	7	30.8	0.915	34	145.17	23	2	86.0105	1	0.17
1	11.34	150	872.6	879.5	876.05	6.9	5.9	32	1.119	32	60.82	9	1	91.1988	0.915027	4.49278
2	11.34	150	872.6	879.5	876.05	6.9	5.9	32	1.119	32	60.82	9	1	91.1988	0.915027	3.30325
3	11.34	150	872.6	879.5	876.05	6.9	5.9	32	1.119	32	60.82	9	1	91.1988	0.915027	1.8575
4	11.34	150	872.6	879.5	876.05	6.9	5.9	32	1.119	32	60.82	9	1	91.1988	0.915027	5.115
5	11.34	150	872.6	879.5	876.05	6.9	5.9	32	1.119	32	60.82	9	1	91.1988	0.915027	2.61698
6	11.34	150	872.6	879.5	876.05	6.9	5.9	32	1.119	32	60.82	9	1	91.1988	0.915027	3.12939
7	11.34	150	872.6	879.5	876.05	6.9	5.9	32	1.119	32	60.82	9	1	91.1988	0.915027	1.66535
8	11.34	150	872.6	879.5	876.05	6.9	5.9	32	1.119	32	60.82	9	1	91.1988	0.915027	1.23529
9	11.34	150	872.6	879.5	876.05	6.9	5.9	32	1.119	32	60.82	9	1	91.1988	0.915027	0.155555
1	8.76	150	856	863.9	859.95	6.4	5	31.6	1.263	33	105	17	2	93.5149	0.624889	1.53723
2	8.76	150	856	863.9	859.95	6.4	5	31.6	1.263	33	105	17	2	93.5149	0.624889	1.15604
3	8.76	150	856	863.9	859.95	6.4	5	31.6	1.263	33	105	17	2	93.5149	0.624889	0.574898
4	8.76	150	856	863.9	859.95	6.4	5	31.6	1.263	33	105	17	2	93.5149	0.624889	0.343689
5	8.76	150	856	863.9	859.95	6.4	5	31.6	1.263	33	105	17	2	93.5149	0.624889	2.06838
6	8.76	150	856	863.9	859.95	6.4	5	31.6	1.263	33	105	17	2	93.5149	0.624889	1.99964
7	8.76	150	856	863.9	859.95	6.4	5	31.6	1.263	33	105	17	2	93.5149	0.624889	3.11195
8	8.76	150	856	863.9	859.95	6.4	5	31.6	1.263	33	105	17	2	93.5149	0.624889	2.25585
9	8.76	150	856	863.9	859.95	6.4	5	31.6	1.263	33	105	17	2	93.5149	0.624889	1.16229
10	8.76	150	856	863.9	859.95	6.4	5	31.6	1.263	33	105	17	2	93.5149	0.624889	1.45599
11	8.76	150	856	863.9	859.95	6.4	5	31.6	1.263	33	105	17	2	93.5149	0.624889	0.924835
12	8.76	150	856	863.9	859.95	6.4	5	31.6	1.263	33	105	17	2	93.5149	0.624889	0.631138
1	8.3	150	864.6	869.8	867.2	5.2	4.4	43	0.862	31.7	99.12	14	1	89.499	0.46154	1.54154
2	8.3	150	864.6	869.8	867.2	5.2	4.4	43	0.862	31.7	99.12	14	1	89.499	0.46154	1.47231
3	8.3	150	864.6	869.8	867.2	5.2	4.4	43	0.862	31.7	99.12	14	1	89.499	0.46154	1.65231
4	8.3	150	864.6	869.8	867.2	5.2	4.4	43	0.862	31.7	99.12	14	1	89.499	0.46154	1.71693
5	8.3	150	864.6	869.8	867.2	5.2	4.4	43	0.862	31.7	99.12	14	1	89.499	0.46154	1.60616
6	8.3	150	864.6	869.8	867.2	5.2	4.4	43	0.862	31.7	99.12	14	1	89.499	0.46154	1.37077
7	8.3	150	864.6	869.8	867.2	5.2	4.4	43	0.862	31.7	99.12	14	1	89.499	0.46154	0.867696
8	8.3	150	864.6	869.8	867.2	5.2	4.4	43	0.862	31.7	99.12	14	1	89.499	0.46154	0.503079
1	9.67	125	1039.7	1050.9	1045.3	11.2	9.9	31.7	0.886	27	59.7	9	1	90.6334	0.945357	1.5882
2	9.67	125	1039.7	1050.9	1045.3	11.2	9.9	31.7	0.886	27	59.7	9	1	90.6334	0.945357	0.491586
3	9.67	125	1039.7	1050.9	1045.3	11.2	9.9	31.7	0.886	27	59.7	9	1	90.6334	0.945357	0.151257
4	9.67	125	1039.7	1050.9	1045.3	11.2	9.9	31.7	0.886	27	59.7	9	1	90.6334	0.945357	0.642843
5	9.67	125	1039.7	1050.9	1045.3	11.2	9.9	31.7	0.886	27	59.7	9	1	90.6334	0.945357	1.87181
6	9.67	125	1039.7	1050.9	1045.3	11.2	9.9	31.7	0.886	27	59.7	9	1	90.6334	0.945357	1.92853
7	9.67	125	1039.7	1050.9	1045.3	11.2	9.9	31.7	0.886	27	59.7	9	1	90.6334	0.945357	1.11552
8	9.67	125	1039.7	1050.9	1045.3	11.2	9.9	31.7	0.886	27	59.7	9	1	90.6334	0.945357	1.30459
9	9.67	125	1039.7	1050.9	1045.3	11.2	9.9	31.7	0.886	27	59.7	9	1	90.6334	0.945357	2.05142
10	9.67	125	1039.7	1050.9	1045.3	11.2	9.9	31.7	0.886	27	59.7	9	1	90.6334	0.945357	2.92115
11	9.67	125	1039.7	1050.9	1045.3	11.2	9.9	31.7	0.886	27	59.7	9	1	90.6334	0.945357	4.7646
12	9.67	125	1039.7	1050.9	1045.3	11.2	9.9	31.7	0.886	27	59.7	9	1	90.6334	0.945357	5.97466
1	8.76	150	891.4	896.2	893.8	4.8	3.5	29	0.792	29.6	59.64	8.5	1	93.025	0.813977	0.594203
2	8.76	150	891.4	896.2	893.8	4.8	3.5	29	0.792	29.6	59.64	8.5	1	93.025	0.813977	2.36867
3	8.76	150	891.4	896.2	893.8	4.8	3.5	29	0.792	29.6	59.64	8.5	1	93.025	0.813977	4.98154
4	8.76	150	891.4	896.2	893.8	4.8	3.5	29	0.792	29.6	59.64	8.5	1	93.025	0.813977	8.20489
5	8.76	150	891.4	896.2	893.8	4.8	3.5	29	0.792	29.6	59.64	8.5	1	93.025	0.813977	12.3806
6	8.76	150	891.4	896.2	893.8	4.8	3.5	29	0.792	29.6	59.64	8.5	1	93.025	0.813977	12.4294
7	8.76	150	891.4	896.2	893.8	4.8	3.5	29	0.792	29.6	59.64	8.5	1	93.025	0.813977	5.86064
8	8.76	150	891.4	896.2	893.8	4.8	3.5	29	0.792	29.6	59.64	8.5	1	93.025	0.813977	3.58964
9	8.76	150	891.4	896.2	893.8	4.8	3.5	29	0.792	29.6	59.64	8.5	1	93.025	0.813977	1.95355
10	8.76	150	891.4	896.2	893.8	4.8	3.5	29	0.792	29.6	59.64	8.5	1	93.025	0.813977	1.34306
11	8.76	150	891.4	896.2	893.8	4.8	3.5	29	0.792	29.6	59.64	8.5	1	93.025	0.813977	1.84773
12	8.76	150	891.4	896.2	893.8	4.8	3.5	29	0.792	29.6	59.64	8.5	1	93.025	0.813977	2.45821
1	10.26	150	837	842.2	839.6	4.4	2.4	28.6	0.824	32	262.92	43	2	98.8488	1	2.41
1	10.58	125	1100.8	1109.6	1105.2	8.5	5.7	28	0.533	31.8	113.52	17	2	93.9227	0.592881	0.029644
2	10.58	125	1100.8	1109.6	1105.2	8.5	5.7	28	0.533	31.8	113.52	17	2	93.9227	0.592881	1.47627
3	10.58	125	1100.8	1109.6	1105.2	8.5	5.7	28	0.533	31.8	113.52	17	2	93.9227	0.592881	1.37548
4	10.58	125	1100.8	1109.6	1105.2	8.5	5.7	28	0.533	31.8	113.52	17	2	93.9227	0.592881	1.55335
5	10.58	125	1100.8	1109.6	1105.2	8.5	5.7	28	0.533	31.8	113.52	17	2	93.9227	0.592881	1.80236
6	10.58	125	1100.8	1109.6	1105.2	8.5	5.7	28	0.533	31.8	113.52	17	2	93.9227	0.592881	2.65611
7	10.58	125	1100.8	1109.6	1105.2	8.5	5.7	28	0.533	31.8	113.52	17	2	93.9227	0.592881	2.70947
8	10.58	125	1100.8	1109.6	1105.2	8.5	5.7	28	0.533	31.8	113.52	17	2	93.9227	0.592881	2.85769
9	10.58	125	1100.8	1109.6	1105.2	8.5	5.7	28	0.533	31.8	113.52	17	2	93.9227	0.592881	1.52963
10	10.58	125	1100.8	1109.6	1105.2	8.5	5.7	28	0.533	31.8	113.52	17	2	93.9227	0.592881	0.924894
1	9.5	125	859.6	872	865.8	10.9	8.4	31.6	0.571	25	187.68	27	2	92.5958	0.781682	1.12562
2	9.5	125	859.6	872	865.8	10.9	8.4	31.6	0.571	25	187.68	27	2	92.5958	0.781682	1.43829
3	9.5	125	859.6	872	865.8	10.9	8.4	31.6	0.571	25	187.68	27	2	92.5958	0.781682	1.23506
4	9.5	125	859.6	872	865.8	10.9	8.4	31.6	0.571	25	187.68	27	2	92.5958	0.781682	1.43829
5	9.5	125	859.6	872	865.8	10.9	8.4	31.6	0.571	25	187.68	27	2	92.5958	0.781682	1.39139
6	9.5	125	859.6	872	865.8	10.9	8.4	31.6	0.571	25	187.68	27	2	92.5958	0.781682	0.586261
1	9.32	175	928	937.3	932.65	9.3	7.4	33	0.987	31.6	105	19	1	0	0.691825	4.99497
2	9.32	175	928	937.3	932.65	9.3	7.4	33	0.987	31.6	105	19	1	0	0.691825	4.84969
3	9.32	175	928	937.3	932.65	9.3	7.4	33	0.987	31.6	105	19	1	0	0.691825	4.97422
4	9.32	175	928	937.3	932.65	9.3	7.4	33	0.987	31.6	105	19	1	0	0.691825	5.54152
5	9.32	175	928	937.3	932.65	9.3	7.4	33	0.987	31.6	105	19	1	0	0.691825	5.56919
6	9.32	175	928	937.3	932.65	9.3	7.4	33	0.987	31.6	105	19	1	0	0.691825	4.49686
7	9.32	175	928	937.3	932.65	9.3	7.4	33	0.987	31.6	105	19	1	0	0.691825	5.10567
8	9.32	175	928	937.3	932.65	9.3	7.4	33	0.987	31.6	105	19	1	0	0.691825	3.58365
9	9.32	175	928	937.3	932.65	9.3	7.4	33	0.987	31.6	105	19	1	0	0.691825	3.55598
10	9.32	175	928	937.3	932.65	9.3	7.4	33	0.987	31.6	105	19	1	0	0.691825	3.50063
11	9.32	175	928	937.3	932.65	9.3	7.4	33	0.987	31.6	105	19	1	0	0.691825	3.43837
12	9.32	175	928	937.3	932.65	9.3	7.4	33	0.987	31.6	105	19	1	0	0.691825	3.4868
1	9.48	125	991.6	998.4	995	6.4	5.4	25	1.044	30.7	95	17	2	0	0.604147	1.52245
2	9.48	125	991.6	998.4	995	6.4	5.4	25	1.044	30.7	95	17	2	0	0.604147	2.35013
3	9.48	125	991.6	998.4	995	6.4	5.4	25	1.044	30.7	95	17	2	0	0.604147	2.50721
4	9.48	125	991.6	998.4	995	6.4	5.4	25	1.044	30.7	95	17	2	0	0.604147	1.61307
5	9.48	125	991.6	998.4	995	6.4	5.4	25	1.044	30.7	95	17	2	0	0.604147	1.08747
6	9.48	125	991.6	998.4	995	6.4	5.4	25	1.044	30.7	95	17	2	0	0.604147	1.34725
7	9.48	125	991.6	998.4	995	6.4	5.4	25	1.044	30.7	95	17	2	0	0.604147	0.936428
8	9.48	125	991.6	998.4	995	6.4	5.4	25	1.044	30.7	95	17	2	0	0.604147	0.501442
9	9.48	125	991.6	998.4	995	6.4	5.4	25	1.044	30.7	95	17	2	0	0.604147	0.845806
10	9.48	125	991.6	998.4	995	6.4	5.4	25	1.044	30.7	95	17	2	0	0.604147	1.12371
11	9.48	125	991.6	998.4	995	6.4	5.4	25	1.044	30.7	95	17	2	0	0.604147	0.833723
12	9.48	125	991.6	998.4	995	6.4	5.4	25	1.044	30.7	95	17	2	0	0.604147	1.02705
1	8.76	150	857.9	866.2	862.05	8.3	7.5	33	1.077	32.3	99.58	14	1	89.0267	0.982139	3.60445
2	8.76	150	857.9	866.2	862.05	8.3	7.5	33	1.077	32.3	99.58	14	1	89.0267	0.982139	9.11425
3	8.76	150	857.9	866.2	862.05	8.3	7.5	33	1.077	32.3	99.58	14	1	89.0267	0.982139	9.58567
4	8.76	150	857.9	866.2	862.05	8.3	7.5	33	1.077	32.3	99.58	14	1	89.0267	0.982139	12.5419
5	8.76	150	857.9	866.2	862.05	8.3	7.5	33	1.077	32.3	99.58	14	1	89.0267	0.982139	8.66246
6	8.76	150	857.9	866.2	862.05	8.3	7.5	33	1.077	32.3	99.58	14	1	89.0267	0.982139	7.03211
7	8.76	150	857.9	866.2	862.05	8.3	7.5	33	1.077	32.3	99.58	14	1	89.0267	0.982139	4.31159
8	8.76	150	857.9	866.2	862.05	8.3	7.5	33	1.077	32.3	99.58	14	1	89.0267	0.982139	3.28034
9	8.76	150	857.9	866.2	862.05	8.3	7.5	33	1.077	32.3	99.58	14	1	89.0267	0.982139	1.35535
10	8.76	150	857.9	866.2	862.05	8.3	7.5	33	1.077	32.3	99.58	14	1	89.0267	0.982139	0.893746
1	9.5	125	934.9	947.3	941.1	10.6	8.6	22	0.333	31.3	116.99	17	2	87.3171	0.607046	1.05626
2	9.5	125	934.9	947.3	941.1	10.6	8.6	22	0.333	31.3	116.99	17	2	87.3171	0.607046	0.370298
1	10.26	150	878	885.6	881.8	6.4	4	32	0.78	29.3	270	49	2	83.7209	0.402643	8.79775
2	10.26	150	878	885.6	881.8	6.4	4	32	0.78	29.3	270	49	2	83.7209	0.402643	7.69853
3	10.26	150	878	885.6	881.8	6.4	4	32	0.78	29.3	270	49	2	83.7209	0.402643	7.61398
4	10.26	150	878	885.6	881.8	6.4	4	32	0.78	29.3	270	49	2	83.7209	0.402643	7.78309
5	10.26	150	878	885.6	881.8	6.4	4	32	0.78	29.3	270	49	2	83.7209	0.402643	6.07186
6	10.26	150	878	885.6	881.8	6.4	4	32	0.78	29.3	270	49	2	83.7209	0.402643	4.80756
7	10.26	150	878	885.6	881.8	6.4	4	32	0.78	29.3	270	49	2	83.7209	0.402643	0.954264
8	10.26	150	878	885.6	881.8	6.4	4	32	0.78	29.3	270	49	2	83.7209	0.402643	0.664361
1	10.26	150	896.2	904.1	900.15	6.6	4.4	28	1.052	31.6	270	49	2	83.7209	0.597357	13.0523
2	10.26	150	896.2	904.1	900.15	6.6	4.4	28	1.052	31.6	270	49	2	83.7209	0.597357	11.4215
3	10.26	150	896.2	904.1	900.15	6.6	4.4	28	1.052	31.6	270	49	2	83.7209	0.597357	11.296
4	10.26	150	896.2	904.1	900.15	6.6	4.4	28	1.052	31.6	270	49	2	83.7209	0.597357	11.5469
5	10.26	150	896.2	904.1	900.15	6.6	4.4	28	1.052	31.6	270	49	2	83.7209	0.597357	9.00814
6	10.26	150	896.2	904.1	900.15	6.6	4.4	28	1.052	31.6	270	49	2	83.7209	0.597357	7.13244
7	10.26	150	896.2	904.1	900.15	6.6	4.4	28	1.052	31.6	270	49	2	83.7209	0.597357	1.41574
8	10.26	150	896.2	904.1	900.15	6.6	4.4	28	1.052	31.6	270	49	2	83.7209	0.597357	0.985639
1	9.5	125	854.1	860.8	857.45	6.5	4.8	25	0.83	29.6	170.08	27	2	92.6311	0.743561	5.48004
2	9.5	125	854.1	860.8	857.45	6.5	4.8	25	0.83	29.6	170.08	27	2	92.6311	0.743561	5.02647
3	9.5	125	854.1	860.8	857.45	6.5	4.8	25	0.83	29.6	170.08	27	2	92.6311	0.743561	5.44287
4	9.5	125	854.1	860.8	857.45	6.5	4.8	25	0.83	29.6	170.08	27	2	92.6311	0.743561	3.65832
5	9.5	125	854.1	860.8	857.45	6.5	4.8	25	0.83	29.6	170.08	27	2	92.6311	0.743561	1.98531
6	9.5	125	854.1	860.8	857.45	6.5	4.8	25	0.83	29.6	170.08	27	2	92.6311	0.743561	3.45756
7	9.5	125	854.1	860.8	857.45	6.5	4.8	25	0.83	29.6	170.08	27	2	92.6311	0.743561	2.95194
8	9.5	125	854.1	860.8	857.45	6.5	4.8	25	0.83	29.6	170.08	27	2	92.6311	0.743561	2.60246
9	9.5	125	854.1	860.8	857.45	6.5	4.8	25	0.83	29.6	170.08	27	2	92.6311	0.743561	2.99655
10	9.5	125	854.1	860.8	857.45	6.5	4.8	25	0.83	29.6	170.08	27	2	92.6311	0.743561	2.76605
2	8.08	125	885	892.5	888.75	7.5	6	31	1.003	31.1	135	25	1	91.4858	0.993725	0.944039
3	8.08	125	885	892.5	888.75	7.5	6	31	1.003	31.1	135	25	1	91.4858	0.993725	1.02354
4	8.08	125	885	892.5	888.75	7.5	6	31	1.003	31.1	135	25	1	91.4858	0.993725	2.05701
5	8.08	125	885	892.5	888.75	7.5	6	31	1.003	31.1	135	25	1	91.4858	0.993725	1.56015
6	8.08	125	885	892.5	888.75	7.5	6	31	1.003	31.1	135	25	1	91.4858	0.993725	0.725419
1	8.16	125	889.5	899.6	894.55	10.1	4.1	21	0.782	31.9	60.84	9	1	87.8854	0.572679	1.9242
2	8.16	125	889.5	899.6	894.55	10.1	4.1	21	0.782	31.9	60.84	9	1	87.8854	0.572679	2.39952
3	8.16	125	889.5	899.6	894.55	10.1	4.1	21	0.782	31.9	60.84	9	1	87.8854	0.572679	1.31143
4	8.16	125	889.5	899.6	894.55	10.1	4.1	21	0.782	31.9	60.84	9	1	87.8854	0.572679	0.60704
5	8.16	125	889.5	899.6	894.55	10.1	4.1	21	0.782	31.9	60.84	9	1	87.8854	0.572679	0.675761
6	8.16	125	889.5	899.6	894.55	10.1	4.1	21	0.782	31.9	60.84	9	1	87.8854	0.572679	0.0572679
7	8.16	125	889.5	899.6	894.55	10.1	4.1	21	0.782	31.9	60.84	9	1	87.8854	0.572679	0.0458143
8	8.16	125	889.5	899.6	894.55	10.1	4.1	21	0.782	31.9	60.84	9	1	87.8854	0.572679	0.383695
1	9.51	150	880	884	882	4	3.6	32	0.903	32.5	88.12	14	1	92.5296	0.667187	3.06239
2	9.51	150	880	884	882	4	3.6	32	0.903	32.5	88.12	14	1	92.5296	0.667187	0.380296
3	9.51	150	880	884	882	4	3.6	32	0.903	32.5	88.12	14	1	92.5296	0.667187	0.82064
4	9.51	150	880	884	882	4	3.6	32	0.903	32.5	88.12	14	1	92.5296	0.667187	1.58123
5	9.51	150	880	884	882	4	3.6	32	0.903	32.5	88.12	14	1	92.5296	0.667187	0.366953
6	9.51	150	880	884	882	4	3.6	32	0.903	32.5	88.12	14	1	92.5296	0.667187	1.15423
7	9.51	150	880	884	882	4	3.6	32	0.903	32.5	88.12	14	1	92.5296	0.667187	1.46781
8	9.51	150	880	884	882	4	3.6	32	0.903	32.5	88.12	14	1	92.5296	0.667187	0.940733
1	9.17	150	897	904.9	900.95	7.9	7.2	0	0.619	31.7	74.98	14	1	96.594	0.652189	0.208701
2	9.17	150	897	904.9	900.95	7.9	7.2	0	0.619	31.7	74.98	14	1	96.594	0.652189	1.44134
3	9.17	150	897	904.9	900.95	7.9	7.2	0	0.619	31.7	74.98	14	1	96.594	0.652189	2.25005
4	9.17	150	897	904.9	900.95	7.9	7.2	0	0.619	31.7	74.98	14	1	96.594	0.652189	2.63484
5	9.17	150	897	904.9	900.95	7.9	7.2	0	0.619	31.7	74.98	14	1	96.594	0.652189	3.43704
6	9.17	150	897	904.9	900.95	7.9	7.2	0	0.619	31.7	74.98	14	1	96.594	0.652189	3.67183
7	9.17	150	897	904.9	900.95	7.9	7.2	0	0.619	31.7	74.98	14	1	96.594	0.652189	2.64789
8	9.17	150	897	904.9	900.95	7.9	7.2	0	0.619	31.7	74.98	14	1	96.594	0.652189	2.82398
9	9.17	150	897	904.9	900.95	7.9	7.2	0	0.619	31.7	74.98	14	1	96.594	0.652189	3.48269
10	9.17	150	897	904.9	900.95	7.9	7.2	0	0.619	31.7	74.98	14	1	96.594	0.652189	2.17831
1	10.26	150	946	947.3	946.65	1.3	1	0	0.459	29.6	108.9	18	1	94.1176	0.0571464	0.143437
2	10.26	150	946	947.3	946.65	1.3	1	0	0.459	29.6	108.9	18	1	94.1176	0.0571464	0.102292
3	10.26	150	946	947.3	946.65	1.3	1	0	0.459	29.6	108.9	18	1	94.1176	0.0571464	0.174297
4	10.26	150	946	947.3	946.65	1.3	1	0	0.459	29.6	108.9	18	1	94.1176	0.0571464	0.209727
5	10.26	150	946	947.3	946.65	1.3	1	0	0.459	29.6	108.9	18	1	94.1176	0.0571464	0.217728
6	10.26	150	946	947.3	946.65	1.3	1	0	0.459	29.6	108.9	18	1	94.1176	0.0571464	0.254873
7	10.26	150	946	947.3	946.65	1.3	1	0	0.459	29.6	108.9	18	1	94.1176	0.0571464	0.096006
8	10.26	150	946	947.3	946.65	1.3	1	0	0.459	29.6	108.9	18	1	94.1176	0.0571464	0.0285732
1	10.26	150	951.9	955.5	953.7	3.2	3.1	0	0.652	30.6	0	0	2	94.1176	0.251643	0.631625
2	10.26	150	951.9	955.5	953.7	3.2	3.1	0	0.652	30.6	0	0	2	94.1176	0.251643	0.450442
3	10.26	150	951.9	955.5	953.7	3.2	3.1	0	0.652	30.6	0	0	2	94.1176	0.251643	0.767512
4	10.26	150	951.9	955.5	953.7	3.2	3.1	0	0.652	30.6	0	0	2	94.1176	0.251643	0.923531
5	10.26	150	951.9	955.5	953.7	3.2	3.1	0	0.652	30.6	0	0	2	94.1176	0.251643	0.958761
6	10.26	150	951.9	955.5	953.7	3.2	3.1	0	0.652	30.6	0	0	2	94.1176	0.251643	1.12233
7	10.26	150	951.9	955.5	953.7	3.2	3.1	0	0.652	30.6	0	0	2	94.1176	0.251643	0.422761
8	10.26	150	951.9	955.5	953.7	3.2	3.1	0	0.652	30.6	0	0	2	94.1176	0.251643	0.125822
1	10.26	150	959.2	964	961.6	4.2	3.6	0	0.61	31.7	180.4	29	2	94.1176	0.273406	0.68625
2	10.26	150	959.2	964	961.6	4.2	3.6	0	0.61	31.7	180.4	29	2	94.1176	0.273406	0.489397
3	10.26	150	959.2	964	961.6	4.2	3.6	0	0.61	31.7	180.4	29	2	94.1176	0.273406	0.833889
4	10.26	150	959.2	964	961.6	4.2	3.6	0	0.61	31.7	180.4	29	2	94.1176	0.273406	1.0034
5	10.26	150	959.2	964	961.6	4.2	3.6	0	0.61	31.7	180.4	29	2	94.1176	0.273406	1.04168
6	10.26	150	959.2	964	961.6	4.2	3.6	0	0.61	31.7	180.4	29	2	94.1176	0.273406	1.21939
7	10.26	150	959.2	964	961.6	4.2	3.6	0	0.61	31.7	180.4	29	2	94.1176	0.273406	0.459323
8	10.26	150	959.2	964	961.6	4.2	3.6	0	0.61	31.7	180.4	29	2	94.1176	0.273406	0.136703
1	10.26	150	965.7	971	968.35	5.3	4.2	0	0.799	31.6	91.28	15	1	94.1176	0.417804	1.04869
2	10.26	150	965.7	971	968.35	5.3	4.2	0	0.799	31.6	91.28	15	1	94.1176	0.417804	0.747869
3	10.26	150	965.7	971	968.35	5.3	4.2	0	0.799	31.6	91.28	15	1	94.1176	0.417804	1.2743
4	10.26	150	965.7	971	968.35	5.3	4.2	0	0.799	31.6	91.28	15	1	94.1176	0.417804	1.53334
5	10.26	150	965.7	971	968.35	5.3	4.2	0	0.799	31.6	91.28	15	1	94.1176	0.417804	1.59183
6	10.26	150	965.7	971	968.35	5.3	4.2	0	0.799	31.6	91.28	15	1	94.1176	0.417804	1.8634
7	10.26	150	965.7	971	968.35	5.3	4.2	0	0.799	31.6	91.28	15	1	94.1176	0.417804	0.70191
8	10.26	150	965.7	971	968.35	5.3	4.2	0	0.799	31.6	91.28	15	1	94.1176	0.417804	0.208902
1	7.79	150	841.4	848.8	845.1	6.9	3.2	25	0.93	31.7	90.88	14	1	90.3867	0.395287	0.719423
2	7.79	150	841.4	848.8	845.1	6.9	3.2	25	0.93	31.7	90.88	14	1	90.3867	0.395287	3.02395
3	7.79	150	841.4	848.8	845.1	6.9	3.2	25	0.93	31.7	90.88	14	1	90.3867	0.395287	0.0237172
4	7.79	150	841.4	848.8	845.1	6.9	3.2	25	0.93	31.7	90.88	14	1	90.3867	0.395287	1.33607
5	7.79	150	841.4	848.8	845.1	6.9	3.2	25	0.93	31.7	90.88	14	1	90.3867	0.395287	0.0434816
6	7.79	150	841.4	848.8	845.1	6.9	3.2	25	0.93	31.7	90.88	14	1	90.3867	0.395287	1.01194
7	7.79	150	841.4	848.8	845.1	6.9	3.2	25	0.93	31.7	90.88	14	1	90.3867	0.395287	0.992171
8	7.79	150	841.4	848.8	845.1	6.9	3.2	25	0.93	31.7	90.88	14	1	90.3867	0.395287	0.592931
9	7.79	150	841.4	848.8	845.1	6.9	3.2	25	0.93	31.7	90.88	14	1	90.3867	0.395287	0.359712
10	7.79	150	841.4	848.8	845.1	6.9	3.2	25	0.93	31.7	90.88	14	1	90.3867	0.395287	0.450628
11	7.79	150	841.4	848.8	845.1	6.9	3.2	25	0.93	31.7	90.88	14	1	90.3867	0.395287	0.612695
1	10.14	150	863.9	870.5	867.2	6.6	4.4	29	0.916	31.9	94.78	14	1	79.434	0.893441	2.18
2	10.14	150	863.9	870.5	867.2	6.6	4.4	29	0.916	31.9	94.78	14	1	79.434	0.893441	1.1436
3	10.14	150	863.9	870.5	867.2	6.6	4.4	29	0.916	31.9	94.78	14	1	79.434	0.893441	3.75245
4	10.14	150	863.9	870.5	867.2	6.6	4.4	29	0.916	31.9	94.78	14	1	79.434	0.893441	6.46851
5	10.14	150	863.9	870.5	867.2	6.6	4.4	29	0.916	31.9	94.78	14	1	79.434	0.893441	4.48507
6	10.14	150	863.9	870.5	867.2	6.6	4.4	29	0.916	31.9	94.78	14	1	79.434	0.893441	2.27827
7	10.14	150	863.9	870.5	867.2	6.6	4.4	29	0.916	31.9	94.78	14	1	79.434	0.893441	2.93942
8	10.14	150	863.9	870.5	867.2	6.6	4.4	29	0.916	31.9	94.78	14	1	79.434	0.893441	4.40466
9	10.14	150	863.9	870.5	867.2	6.6	4.4	29	0.916	31.9	94.78	14	1	79.434	0.893441	4.10983
10	10.14	150	863.9	870.5	867.2	6.6	4.4	29	0.916	31.9	94.78	14	1	79.434	0.893441	0.679015
11	10.14	150	863.9	870.5	867.2	6.6	4.4	29	0.916	31.9	94.78	14	1	79.434	0.893441	1.1168
1	8.42	125	991.6	1000.5	996.05	6.9	5.4	28	0.648	31.3	135.02	23	2	94.5069	0.584447	0.543536
2	8.42	125	991.6	1000.5	996.05	6.9	5.4	28	0.648	31.3	135.02	23	2	94.5069	0.584447	1.36761
3	8.42	125	991.6	1000.5	996.05	6.9	5.4	28	0.648	31.3	135.02	23	2	94.5069	0.584447	0.92927
4	8.42	125	991.6	1000.5	996.05	6.9	5.4	28	0.648	31.3	135.02	23	2	94.5069	0.584447	0.946804
5	8.42	125	991.6	1000.5	996.05	6.9	5.4	28	0.648	31.3	135.02	23	2	94.5069	0.584447	1.32085
6	8.42	125	991.6	1000.5	996.05	6.9	5.4	28	0.648	31.3	135.02	23	2	94.5069	0.584447	0.239623
7	8.42	125	991.6	1000.5	996.05	6.9	5.4	28	0.648	31.3	135.02	23	2	94.5069	0.584447	0.0935115
1	8.3	150	864.6	869.8	867.2	5.2	4.4	30	0.862	31.7	105.3	17	1	90.4401	0.402928	3.36445
2	8.3	150	864.6	869.8	867.2	5.2	4.4	30	0.862	31.7	105.3	17	1	90.4401	0.402928	4.06151
3	8.3	150	864.6	869.8	867.2	5.2	4.4	30	0.862	31.7	105.3	17	1	90.4401	0.402928	4.09778
4	8.3	150	864.6	869.8	867.2	5.2	4.4	30	0.862	31.7	105.3	17	1	90.4401	0.402928	3.84393
5	8.3	150	864.6	869.8	867.2	5.2	4.4	30	0.862	31.7	105.3	17	1	90.4401	0.402928	3.07837
6	8.3	150	864.6	869.8	867.2	5.2	4.4	30	0.862	31.7	105.3	17	1	90.4401	0.402928	2.51024
7	8.3	150	864.6	869.8	867.2	5.2	4.4	30	0.862	31.7	105.3	17	1	90.4401	0.402928	2.83258
8	8.3	150	864.6	869.8	867.2	5.2	4.4	30	0.862	31.7	105.3	17	1	90.4401	0.402928	2.62709
9	8.3	150	864.6	869.8	867.2	5.2	4.4	30	0.862	31.7	105.3	17	1	90.4401	0.402928	2.76006
10	8.3	150	864.6	869.8	867.2	5.2	4.4	30	0.862	31.7	105.3	17	1	90.4401	0.402928	2.22819
11	8.3	150	864.6	869.8	867.2	5.2	4.4	30	0.862	31.7	105.3	17	1	90.4401	0.402928	1.24908
12	8.3	150	864.6	869.8	867.2	5.2	4.4	30	0.862	31.7	105.3	17	1	90.4401	0.402928	0.729299
1	9.16	175	932.4	939.7	936.05	7.3	5.6	32	0.914	31.7	136.61	19	1	92.8069	0.910877	6.6494
2	9.16	175	932.4	939.7	936.05	7.3	5.6	32	0.914	31.7	136.61	19	1	92.8069	0.910877	8.25255
3	9.16	175	932.4	939.7	936.05	7.3	5.6	32	0.914	31.7	136.61	19	1	92.8069	0.910877	8.77175
4	9.16	175	932.4	939.7	936.05	7.3	5.6	32	0.914	31.7	136.61	19	1	92.8069	0.910877	0.37346
5	9.16	175	932.4	939.7	936.05	7.3	5.6	32	0.914	31.7	136.61	19	1	92.8069	0.910877	0.0728702
6	9.16	175	932.4	939.7	936.05	7.3	5.6	32	0.914	31.7	136.61	19	1	92.8069	0.910877	1.58493
7	9.16	175	932.4	939.7	936.05	7.3	5.6	32	0.914	31.7	136.61	19	1	92.8069	0.910877	2.75085
8	9.16	175	932.4	939.7	936.05	7.3	5.6	32	0.914	31.7	136.61	19	1	92.8069	0.910877	1.84908
9	9.16	175	932.4	939.7	936.05	7.3	5.6	32	0.914	31.7	136.61	19	1	92.8069	0.910877	0.765137
1	8.76	150	866.1	871.6	868.85	5.5	3.2	26	0.552	30.3	92.2	14	1	93.2998	0.775145	2.78277
2	8.76	150	866.1	871.6	868.85	5.5	3.2	26	0.552	30.3	92.2	14	1	93.2998	0.775145	1.96887
3	8.76	150	866.1	871.6	868.85	5.5	3.2	26	0.552	30.3	92.2	14	1	93.2998	0.775145	1.01544
4	8.76	150	866.1	871.6	868.85	5.5	3.2	26	0.552	30.3	92.2	14	1	93.2998	0.775145	1.97662
5	8.76	150	866.1	871.6	868.85	5.5	3.2	26	0.552	30.3	92.2	14	1	93.2998	0.775145	2.51922
6	8.76	150	866.1	871.6	868.85	5.5	3.2	26	0.552	30.3	92.2	14	1	93.2998	0.775145	3.29437
7	8.76	150	866.1	871.6	868.85	5.5	3.2	26	0.552	30.3	92.2	14	1	93.2998	0.775145	2.11615
8	8.76	150	866.1	871.6	868.85	5.5	3.2	26	0.552	30.3	92.2	14	1	93.2998	0.775145	2.1394
9	8.76	150	866.1	871.6	868.85	5.5	3.2	26	0.552	30.3	92.2	14	1	93.2998	0.775145	2.4107
10	8.76	150	866.1	871.6	868.85	5.5	3.2	26	0.552	30.3	92.2	14	1	93.2998	0.775145	2.24792
11	8.76	150	866.1	871.6	868.85	5.5	3.2	26	0.552	30.3	92.2	14	1	93.2998	0.775145	2.30993
1	9.51	150	975.9	983.3	979.6	6.8	4.8	30	1.193	31.8	224.91	33	2	93.7126	0.486736	0.0146021
2	9.51	150	975.9	983.3	979.6	6.8	4.8	30	1.193	31.8	224.91	33	2	93.7126	0.486736	0.0340715
3	9.51	150	975.9	983.3	979.6	6.8	4.8	30	1.193	31.8	224.91	33	2	93.7126	0.486736	0.121684
4	9.51	150	975.9	983.3	979.6	6.8	4.8	30	1.193	31.8	224.91	33	2	93.7126	0.486736	0.603553
5	9.51	150	975.9	983.3	979.6	6.8	4.8	30	1.193	31.8	224.91	33	2	93.7126	0.486736	0.365052
6	9.51	150	975.9	983.3	979.6	6.8	4.8	30	1.193	31.8	224.91	33	2	93.7126	0.486736	0.0973472
1	9.51	150	985.1	993.1	989.1	6.6	5	30	1.193	30.8	225.01	33	2	93.7126	0.507017	0.0152105
2	9.51	150	985.1	993.1	989.1	6.6	5	30	1.193	30.8	225.01	33	2	93.7126	0.507017	0.0354912
3	9.51	150	985.1	993.1	989.1	6.6	5	30	1.193	30.8	225.01	33	2	93.7126	0.507017	0.126754
4	9.51	150	985.1	993.1	989.1	6.6	5	30	1.193	30.8	225.01	33	2	93.7126	0.507017	0.628701
5	9.51	150	985.1	993.1	989.1	6.6	5	30	1.193	30.8	225.01	33	2	93.7126	0.507017	0.380262
6	9.51	150	985.1	993.1	989.1	6.6	5	30	1.193	30.8	225.01	33	2	93.7126	0.507017	0.101403
1	8.85	125	943.2	951.7	947.45	8.5	7.6	0	0.75	31.8	93.9	15	1	94.7754	0.976195	7.65337
2	8.85	125	943.2	951.7	947.45	8.5	7.6	0	0.75	31.8	93.9	15	1	94.7754	0.976195	7.5167
3	8.85	125	943.2	951.7	947.45	8.5	7.6	0	0.75	31.8	93.9	15	1	94.7754	0.976195	3.50454
4	8.85	125	943.2	951.7	947.45	8.5	7.6	0	0.75	31.8	93.9	15	1	94.7754	0.976195	2.55763
1	11.68	125	1069.5	1075	1072.25	5.5	4.4	32	0.561	30.9	96.24	14	1	96.6831	0.389295	1.57275
2	11.68	125	1069.5	1075	1072.25	5.5	4.4	32	0.561	30.9	96.24	14	1	96.6831	0.389295	1.8219
3	11.68	125	1069.5	1075	1072.25	5.5	4.4	32	0.561	30.9	96.24	14	1	96.6831	0.389295	1.79465
4	11.68	125	1069.5	1075	1072.25	5.5	4.4	32	0.561	30.9	96.24	14	1	96.6831	0.389295	1.51436
5	11.68	125	1069.5	1075	1072.25	5.5	4.4	32	0.561	30.9	96.24	14	1	96.6831	0.389295	1.1562
6	11.68	125	1069.5	1075	1072.25	5.5	4.4	32	0.561	30.9	96.24	14	1	96.6831	0.389295	0.895377
7	11.68	125	1069.5	1075	1072.25	5.5	4.4	32	0.561	30.9	96.24	14	1	96.6831	0.389295	0.30365
1	10.62	150	873.9	885.6	879.75	11.7	9.8	0	1.074	31.6	104	15	1	86.4258	0.777215	5.25397
2	10.62	150	873.9	885.6	879.75	11.7	9.8	0	1.074	31.6	104	15	1	86.4258	0.777215	3.31094
3	10.62	150	873.9	885.6	879.75	11.7	9.8	0	1.074	31.6	104	15	1	86.4258	0.777215	6.50529
4	10.62	150	873.9	885.6	879.75	11.7	9.8	0	1.074	31.6	104	15	1	86.4258	0.777215	4.17364
5	10.62	150	873.9	885.6	879.75	11.7	9.8	0	1.074	31.6	104	15	1	86.4258	0.777215	2.75911
1	10.62	150	917.4	922.7	920.05	3.6	2	0	1.264	32.3	146.92	23	2	92.6187	0.52333	0.151766
2	10.62	150	917.4	922.7	920.05	3.6	2	0	1.264	32.3	146.92	23	2	92.6187	0.52333	3.06148
3	10.62	150	917.4	922.7	920.05	3.6	2	0	1.264	32.3	146.92	23	2	92.6187	0.52333	2.42302
4	10.62	150	917.4	922.7	920.05	3.6	2	0	1.264	32.3	146.92	23	2	92.6187	0.52333	0.675096
5	10.62	150	917.4	922.7	920.05	3.6	2	0	1.264	32.3	146.92	23	2	92.6187	0.52333	0.156999
1	10.62	150	853.1	866.2	859.65	11.1	7	28	0.915	31.5	171.64	27	2	85.0612	1	2.22
2	10.62	150	853.1	866.2	859.65	11.1	7	28	0.915	31.5	171.64	27	2	85.0612	1	3.29
1	9.32	175	950.7	954.5	952.6	3.8	3	31.6	0.883	34	121.14	19	1	96.7132	0.461378	0.595177
2	9.32	175	950.7	954.5	952.6	3.8	3	31.6	0.883	34	121.14	19	1	96.7132	0.461378	0.641315
3	9.32	175	950.7	954.5	952.6	3.8	3	31.6	0.883	34	121.14	19	1	96.7132	0.461378	0.839707
4	9.32	175	950.7	954.5	952.6	3.8	3	31.6	0.883	34	121.14	19	1	96.7132	0.461378	1.25033
5	9.32	175	950.7	954.5	952.6	3.8	3	31.6	0.883	34	121.14	19	1	96.7132	0.461378	0.885845
6	9.32	175	950.7	954.5	952.6	3.8	3	31.6	0.883	34	121.14	19	1	96.7132	0.461378	0.715135
7	9.32	175	950.7	954.5	952.6	3.8	3	31.6	0.883	34	121.14	19	1	96.7132	0.461378	1.01503
8	9.32	175	950.7	954.5	952.6	3.8	3	31.6	0.883	34	121.14	19	1	96.7132	0.461378	0.899686
9	9.32	175	950.7	954.5	952.6	3.8	3	31.6	0.883	34	121.14	19	1	96.7132	0.461378	0.959666
10	9.32	175	950.7	954.5	952.6	3.8	3	31.6	0.883	34	121.14	19	1	96.7132	0.461378	1.16267
1	10.26	150	913.7	919	916.35	5.3	3.7	24	1.048	32.2	110.01	19	1	88.375	0.389208	2.24184
2	10.26	150	913.7	919	916.35	5.3	3.7	24	1.048	32.2	110.01	19	1	88.375	0.389208	2.41698
3	10.26	150	913.7	919	916.35	5.3	3.7	24	1.048	32.2	110.01	19	1	88.375	0.389208	1.46342
4	10.26	150	913.7	919	916.35	5.3	3.7	24	1.048	32.2	110.01	19	1	88.375	0.389208	0.097302
5	10.26	150	913.7	919	916.35	5.3	3.7	24	1.048	32.2	110.01	19	1	88.375	0.389208	0.731711
6	10.26	150	913.7	919	916.35	5.3	3.7	24	1.048	32.2	110.01	19	1	88.375	0.389208	0.723927
7	10.26	150	913.7	919	916.35	5.3	3.7	24	1.048	32.2	110.01	19	1	88.375	0.389208	0.801768
8	10.26	150	913.7	919	916.35	5.3	3.7	24	1.048	32.2	110.01	19	1	88.375	0.389208	0.782308
9	10.26	150	913.7	919	916.35	5.3	3.7	24	1.048	32.2	110.01	19	1	88.375	0.389208	1.05475
10	10.26	150	913.7	919	916.35	5.3	3.7	24	1.048	32.2	110.01	19	1	88.375	0.389208	0.71225
11	10.26	150	913.7	919	916.35	5.3	3.7	24	1.048	32.2	110.01	19	1	88.375	0.389208	0.284122
12	10.26	150	913.7	919	916.35	5.3	3.7	24	1.048	32.2	110.01	19	1	88.375	0.389208	0.0856257
1	10.26	150	929.2	935	932.1	5.8	4.6	0	1.233	32.5	110.02	19	1	88.375	0.569298	3.27916
2	10.26	150	929.2	935	932.1	5.8	4.6	0	1.233	32.5	110.02	19	1	88.375	0.569298	3.53534
3	10.26	150	929.2	935	932.1	5.8	4.6	0	1.233	32.5	110.02	19	1	88.375	0.569298	2.14056
4	10.26	150	929.2	935	932.1	5.8	4.6	0	1.233	32.5	110.02	19	1	88.375	0.569298	0.142324
5	10.26	150	929.2	935	932.1	5.8	4.6	0	1.233	32.5	110.02	19	1	88.375	0.569298	1.07028
6	10.26	150	929.2	935	932.1	5.8	4.6	0	1.233	32.5	110.02	19	1	88.375	0.569298	1.05889
7	10.26	150	929.2	935	932.1	5.8	4.6	0	1.233	32.5	110.02	19	1	88.375	0.569298	1.17275
8	10.26	150	929.2	935	932.1	5.8	4.6	0	1.233	32.5	110.02	19	1	88.375	0.569298	1.14429
9	10.26	150	929.2	935	932.1	5.8	4.6	0	1.233	32.5	110.02	19	1	88.375	0.569298	1.5428
10	10.26	150	929.2	935	932.1	5.8	4.6	0	1.233	32.5	110.02	19	1	88.375	0.569298	1.04181
11	10.26	150	929.2	935	932.1	5.8	4.6	0	1.233	32.5	110.02	19	1	88.375	0.569298	0.415587
12	10.26	150	929.2	935	932.1	5.8	4.6	0	1.233	32.5	110.02	19	1	88.375	0.569298	0.125246
1	10.26	150	938.5	942.1	940.3	3.2	1.3	30	0.318	30.1	140	25	1	88.375	0.0414944	0.239008
2	10.26	150	938.5	942.1	940.3	3.2	1.3	30	0.318	30.1	140	25	1	88.375	0.0414944	0.25768
3	10.26	150	938.5	942.1	940.3	3.2	1.3	30	0.318	30.1	140	25	1	88.375	0.0414944	0.156019
4	10.26	150	938.5	942.1	940.3	3.2	1.3	30	0.318	30.1	140	25	1	88.375	0.0414944	0.0103736
5	10.26	150	938.5	942.1	940.3	3.2	1.3	30	0.318	30.1	140	25	1	88.375	0.0414944	0.0780094
6	10.26	150	938.5	942.1	940.3	3.2	1.3	30	0.318	30.1	140	25	1	88.375	0.0414944	0.0771795
7	10.26	150	938.5	942.1	940.3	3.2	1.3	30	0.318	30.1	140	25	1	88.375	0.0414944	0.0854784
8	10.26	150	938.5	942.1	940.3	3.2	1.3	30	0.318	30.1	140	25	1	88.375	0.0414944	0.0834037
9	10.26	150	938.5	942.1	940.3	3.2	1.3	30	0.318	30.1	140	25	1	88.375	0.0414944	0.11245
10	10.26	150	938.5	942.1	940.3	3.2	1.3	30	0.318	30.1	140	25	1	88.375	0.0414944	0.0759347
11	10.26	150	938.5	942.1	940.3	3.2	1.3	30	0.318	30.1	140	25	1	88.375	0.0414944	0.0302909
12	10.26	150	938.5	942.1	940.3	3.2	1.3	30	0.318	30.1	140	25	1	88.375	0.0414944	0.00912876
1	9.17	150	862.6	865	863.8	2.4	1.7	31.7	0.816	31.7	91	15	1	96.4225	0.176547	1.21288
2	9.17	150	862.6	865	863.8	2.4	1.7	31.7	0.816	31.7	91	15	1	96.4225	0.176547	0.77151
3	9.17	150	862.6	865	863.8	2.4	1.7	31.7	0.816	31.7	91	15	1	96.4225	0.176547	0.494331
4	9.17	150	862.6	865	863.8	2.4	1.7	31.7	0.816	31.7	91	15	1	96.4225	0.176547	0.540234
5	9.17	150	862.6	865	863.8	2.4	1.7	31.7	0.816	31.7	91	15	1	96.4225	0.176547	0.421947
6	9.17	150	862.6	865	863.8	2.4	1.7	31.7	0.816	31.7	91	15	1	96.4225	0.176547	0.644396
7	9.17	150	862.6	865	863.8	2.4	1.7	31.7	0.816	31.7	91	15	1	96.4225	0.176547	0.515517
8	9.17	150	862.6	865	863.8	2.4	1.7	31.7	0.816	31.7	91	15	1	96.4225	0.176547	0.0847425
9	9.17	150	862.6	865	863.8	2.4	1.7	31.7	0.816	31.7	91	15	1	96.4225	0.176547	0.460788
10	9.17	150	862.6	865	863.8	2.4	1.7	31.7	0.816	31.7	91	15	1	96.4225	0.176547	0.305426
11	9.17	150	862.6	865	863.8	2.4	1.7	31.7	0.816	31.7	91	15	1	96.4225	0.176547	0.331908
1	9.17	150	875.2	878.3	876.75	3.1	3.1	29.7	0.842	31.5	91	15	1	96.4225	0.332196	2.28219
2	9.17	150	875.2	878.3	876.75	3.1	3.1	29.7	0.842	31.5	91	15	1	96.4225	0.332196	1.4517
3	9.17	150	875.2	878.3	876.75	3.1	3.1	29.7	0.842	31.5	91	15	1	96.4225	0.332196	0.93015
4	9.17	150	875.2	878.3	876.75	3.1	3.1	29.7	0.842	31.5	91	15	1	96.4225	0.332196	1.01652
5	9.17	150	875.2	878.3	876.75	3.1	3.1	29.7	0.842	31.5	91	15	1	96.4225	0.332196	0.793949
6	9.17	150	875.2	878.3	876.75	3.1	3.1	29.7	0.842	31.5	91	15	1	96.4225	0.332196	1.21252
7	9.17	150	875.2	878.3	876.75	3.1	3.1	29.7	0.842	31.5	91	15	1	96.4225	0.332196	0.970013
8	9.17	150	875.2	878.3	876.75	3.1	3.1	29.7	0.842	31.5	91	15	1	96.4225	0.332196	0.159454
9	9.17	150	875.2	878.3	876.75	3.1	3.1	29.7	0.842	31.5	91	15	1	96.4225	0.332196	0.867033
10	9.17	150	875.2	878.3	876.75	3.1	3.1	29.7	0.842	31.5	91	15	1	96.4225	0.332196	0.5747
11	9.17	150	875.2	878.3	876.75	3.1	3.1	29.7	0.842	31.5	91	15	1	96.4225	0.332196	0.624529
1	9.17	150	881.1	886.9	884	5.2	4	0	0.965	31.4	0	0	2	96.4225	0.491257	3.37493
2	9.17	150	881.1	886.9	884	5.2	4	0	0.965	31.4	0	0	2	96.4225	0.491257	2.14679
3	9.17	150	881.1	886.9	884	5.2	4	0	0.965	31.4	0	0	2	96.4225	0.491257	1.37552
4	9.17	150	881.1	886.9	884	5.2	4	0	0.965	31.4	0	0	2	96.4225	0.491257	1.50325
5	9.17	150	881.1	886.9	884	5.2	4	0	0.965	31.4	0	0	2	96.4225	0.491257	1.1741
6	9.17	150	881.1	886.9	884	5.2	4	0	0.965	31.4	0	0	2	96.4225	0.491257	1.79309
7	9.17	150	881.1	886.9	884	5.2	4	0	0.965	31.4	0	0	2	96.4225	0.491257	1.43447
8	9.17	150	881.1	886.9	884	5.2	4	0	0.965	31.4	0	0	2	96.4225	0.491257	0.235803
9	9.17	150	881.1	886.9	884	5.2	4	0	0.965	31.4	0	0	2	96.4225	0.491257	1.28218
10	9.17	150	881.1	886.9	884	5.2	4	0	0.965	31.4	0	0	2	96.4225	0.491257	0.849874
11	9.17	150	881.1	886.9	884	5.2	4	0	0.965	31.4	0	0	2	96.4225	0.491257	0.923563
1	9.17	150	860.7	873.6	867.15	11	6.9	20	1.186	31.9	170.01	29	2	93.9317	1	3.94
2	9.17	150	860.7	873.6	867.15	11	6.9	20	1.186	31.9	170.01	29	2	93.9317	1	7.75
3	9.17	150	860.7	873.6	867.15	11	6.9	20	1.186	31.9	170.01	29	2	93.9317	1	7.29
4	9.17	150	860.7	873.6	867.15	11	6.9	20	1.186	31.9	170.01	29	2	93.9317	1	7.77
5	9.17	150	860.7	873.6	867.15	11	6.9	20	1.186	31.9	170.01	29	2	93.9317	1	6.73
6	9.17	150	860.7	873.6	867.15	11	6.9	20	1.186	31.9	170.01	29	2	93.9317	1	6.73
7	9.17	150	860.7	873.6	867.15	11	6.9	20	1.186	31.9	170.01	29	2	93.9317	1	7.51
8	9.17	150	860.7	873.6	867.15	11	6.9	20	1.186	31.9	170.01	29	2	93.9317	1	8.28
9	9.17	150	860.7	873.6	867.15	11	6.9	20	1.186	31.9	170.01	29	2	93.9317	1	7.23
10	9.17	150	860.7	873.6	867.15	11	6.9	20	1.186	31.9	170.01	29	2	93.9317	1	5.33
11	9.17	150	860.7	873.6	867.15	11	6.9	20	1.186	31.9	170.01	29	2	93.9317	1	4
1	8.95	125	897.7	906.5	902.1	7.8	7.2	32	0.674	31.1	105	17	2	87.6862	0.768249	3.03458
2	8.95	125	897.7	906.5	902.1	7.8	7.2	32	0.674	31.1	105	17	2	87.6862	0.768249	2.61205
3	8.95	125	897.7	906.5	902.1	7.8	7.2	32	0.674	31.1	105	17	2	87.6862	0.768249	0.868122
1	9.21	150	856	863.9	859.95	6.4	5	31	1.263	31.6	165.08	27	2	88.5656	0.624889	2.61828
2	9.21	150	856	863.9	859.95	6.4	5	31	1.263	31.6	165.08	27	2	88.5656	0.624889	6.28013
3	9.21	150	856	863.9	859.95	6.4	5	31	1.263	31.6	165.08	27	2	88.5656	0.624889	2.46206
4	9.21	150	856	863.9	859.95	6.4	5	31	1.263	31.6	165.08	27	2	88.5656	0.624889	3.56187
5	9.21	150	856	863.9	859.95	6.4	5	31	1.263	31.6	165.08	27	2	88.5656	0.624889	1.80593
6	9.21	150	856	863.9	859.95	6.4	5	31	1.263	31.6	165.08	27	2	88.5656	0.624889	1.64346
7	9.21	150	856	863.9	859.95	6.4	5	31	1.263	31.6	165.08	27	2	88.5656	0.624889	1.9559
8	9.21	150	856	863.9	859.95	6.4	5	31	1.263	31.6	165.08	27	2	88.5656	0.624889	3.0807
9	9.21	150	856	863.9	859.95	6.4	5	31	1.263	31.6	165.08	27	2	88.5656	0.624889	2.23085
10	9.21	150	856	863.9	859.95	6.4	5	31	1.263	31.6	165.08	27	2	88.5656	0.624889	1.63096
1	7.5	150	866	874.9	870.45	7.9	4.5	23	1.133	32.4	85	15	1	94.0158	0.732901	3.36402
2	7.5	150	866	874.9	870.45	7.9	4.5	23	1.133	32.4	85	15	1	94.0158	0.732901	2.57981
3	7.5	150	866	874.9	870.45	7.9	4.5	23	1.133	32.4	85	15	1	94.0158	0.732901	7.00653
4	7.5	150	866	874.9	870.45	7.9	4.5	23	1.133	32.4	85	15	1	94.0158	0.732901	8.01794
5	7.5	150	866	874.9	870.45	7.9	4.5	23	1.133	32.4	85	15	1	94.0158	0.732901	8.85345
6	7.5	150	866	874.9	870.45	7.9	4.5	23	1.133	32.4	85	15	1	94.0158	0.732901	8.67022
7	7.5	150	866	874.9	870.45	7.9	4.5	23	1.133	32.4	85	15	1	94.0158	0.732901	9.48374
8	7.5	150	866	874.9	870.45	7.9	4.5	23	1.133	32.4	85	15	1	94.0158	0.732901	8.82413
9	7.5	150	866	874.9	870.45	7.9	4.5	23	1.133	32.4	85	15	1	94.0158	0.732901	5.59204
10	7.5	150	866	874.9	870.45	7.9	4.5	23	1.133	32.4	85	15	1	94.0158	0.732901	4.39741
1	9.48	125	950.2	957.9	954.05	7.7	7	32	0.88	31.6	106.2	19	1	82.3349	0.986358	2.39685
2	9.48	125	950.2	957.9	954.05	7.7	7	32	0.88	31.6	106.2	19	1	82.3349	0.986358	0.177544
1	7.5	150	858	867	862.5	9	7.2	29	0.987	31.5	115	21	1	93.1169	0.812132	0.755283
2	7.5	150	858	867	862.5	9	7.2	29	0.987	31.5	115	21	1	93.1169	0.812132	5.39256
3	7.5	150	858	867	862.5	9	7.2	29	0.987	31.5	115	21	1	93.1169	0.812132	6.41584
4	7.5	150	858	867	862.5	9	7.2	29	0.987	31.5	115	21	1	93.1169	0.812132	4.92964
5	7.5	150	858	867	862.5	9	7.2	29	0.987	31.5	115	21	1	93.1169	0.812132	3.24853
6	7.5	150	858	867	862.5	9	7.2	29	0.987	31.5	115	21	1	93.1169	0.812132	3.35411
7	7.5	150	858	867	862.5	9	7.2	29	0.987	31.5	115	21	1	93.1169	0.812132	1.90851
8	7.5	150	858	867	862.5	9	7.2	29	0.987	31.5	115	21	1	93.1169	0.812132	0.657827
9	7.5	150	858	867	862.5	9	7.2	29	0.987	31.5	115	21	1	93.1169	0.812132	0.18679
1	7.5	150	873.7	879	876.35	4.8	1.7	20	0.967	31.5	115.01	21	1	93.1169	0.187868	0.174717
2	7.5	150	873.7	879	876.35	4.8	1.7	20	0.967	31.5	115.01	21	1	93.1169	0.187868	1.24744
3	7.5	150	873.7	879	876.35	4.8	1.7	20	0.967	31.5	115.01	21	1	93.1169	0.187868	1.48416
4	7.5	150	873.7	879	876.35	4.8	1.7	20	0.967	31.5	115.01	21	1	93.1169	0.187868	1.14036
5	7.5	150	873.7	879	876.35	4.8	1.7	20	0.967	31.5	115.01	21	1	93.1169	0.187868	0.751471
6	7.5	150	873.7	879	876.35	4.8	1.7	20	0.967	31.5	115.01	21	1	93.1169	0.187868	0.775894
7	7.5	150	873.7	879	876.35	4.8	1.7	20	0.967	31.5	115.01	21	1	93.1169	0.187868	0.441489
8	7.5	150	873.7	879	876.35	4.8	1.7	20	0.967	31.5	115.01	21	1	93.1169	0.187868	0.152173
9	7.5	150	873.7	879	876.35	4.8	1.7	20	0.967	31.5	115.01	21	1	93.1169	0.187868	0.0432096
1	9.21	150	868.3	875	871.65	5.8	4.6	25	1.434	31.7	204.98	37	2	87.6439	0.613921	0.982274
2	9.21	150	868.3	875	871.65	5.8	4.6	25	1.434	31.7	204.98	37	2	87.6439	0.613921	0.497276
3	9.21	150	868.3	875	871.65	5.8	4.6	25	1.434	31.7	204.98	37	2	87.6439	0.613921	0.773541
4	9.21	150	868.3	875	871.65	5.8	4.6	25	1.434	31.7	204.98	37	2	87.6439	0.613921	0.601643
4	10.62	150	840	843.3	841.65	3.3	2.3	30	0.452	30.6	149.44	25	1	93.223	0.115268	0.11181
5	10.62	150	840	843.3	841.65	3.3	2.3	30	0.452	30.6	149.44	25	1	93.223	0.115268	0.409201
6	10.62	150	840	843.3	841.65	3.3	2.3	30	0.452	30.6	149.44	25	1	93.223	0.115268	0.201719
7	10.62	150	840	843.3	841.65	3.3	2.3	30	0.452	30.6	149.44	25	1	93.223	0.115268	0.0852981
4	10.62	150	846.1	858.7	852.4	12.2	9.3	29	0.858	31.5	90.44	15	1	93.223	0.884732	0.85819
5	10.62	150	846.1	858.7	852.4	12.2	9.3	29	0.858	31.5	90.44	15	1	93.223	0.884732	3.1408
6	10.62	150	846.1	858.7	852.4	12.2	9.3	29	0.858	31.5	90.44	15	1	93.223	0.884732	1.54828
7	10.62	150	846.1	858.7	852.4	12.2	9.3	29	0.858	31.5	90.44	15	1	93.223	0.884732	0.654702
1	8.76	150	887.5	892	889.75	2.7	1.7	34	0.648	29.4	267	43	2	93.6709	0.962769	10.3209
2	8.76	150	887.5	892	889.75	2.7	1.7	34	0.648	29.4	267	43	2	93.6709	0.962769	14.9711
3	8.76	150	887.5	892	889.75	2.7	1.7	34	0.648	29.4	267	43	2	93.6709	0.962769	16.3863
4	8.76	150	887.5	892	889.75	2.7	1.7	34	0.648	29.4	267	43	2	93.6709	0.962769	14.8074
5	8.76	150	887.5	892	889.75	2.7	1.7	34	0.648	29.4	267	43	2	93.6709	0.962769	11.5629
6	8.76	150	887.5	892	889.75	2.7	1.7	34	0.648	29.4	267	43	2	93.6709	0.962769	8.88636
7	8.76	150	887.5	892	889.75	2.7	1.7	34	0.648	29.4	267	43	2	93.6709	0.962769	6.9897
2	9.85	150	864	870.8	867.4	5.9	4.1	34.3	0.987	32.5	245	43	2	95.3642	0.294224	0.173592
3	9.85	150	864	870.8	867.4	5.9	4.1	34.3	0.987	32.5	245	43	2	95.3642	0.294224	0.250091
4	9.85	150	864	870.8	867.4	5.9	4.1	34.3	0.987	32.5	245	43	2	95.3642	0.294224	0.609044
5	9.85	150	864	870.8	867.4	5.9	4.1	34.3	0.987	32.5	245	43	2	95.3642	0.294224	0.356011
6	9.85	150	864	870.8	867.4	5.9	4.1	34.3	0.987	32.5	245	43	2	95.3642	0.294224	0.120632
2	9.85	150	877.7	886.8	882.25	8.6	5.7	31.5	1.703	31.7	145	23	2	95.3642	0.705776	0.416408
3	9.85	150	877.7	886.8	882.25	8.6	5.7	31.5	1.703	31.7	145	23	2	95.3642	0.705776	0.599909
4	9.85	150	877.7	886.8	882.25	8.6	5.7	31.5	1.703	31.7	145	23	2	95.3642	0.705776	1.46096
5	9.85	150	877.7	886.8	882.25	8.6	5.7	31.5	1.703	31.7	145	23	2	95.3642	0.705776	0.853989
6	9.85	150	877.7	886.8	882.25	8.6	5.7	31.5	1.703	31.7	145	23	2	95.3642	0.705776	0.289368
1	9.47	125	1063.4	1071.6	1067.5	4.9	0.6	30	0.216	28.5	105	17	2	0	0.247564	0.264894
2	9.47	125	1063.4	1071.6	1067.5	4.9	0.6	30	0.216	28.5	105	17	2	0	0.247564	0.388676
3	9.47	125	1063.4	1071.6	1067.5	4.9	0.6	30	0.216	28.5	105	17	2	0	0.247564	0.698132
4	9.47	125	1063.4	1071.6	1067.5	4.9	0.6	30	0.216	28.5	105	17	2	0	0.247564	0.695656
1	9.47	125	1073.3	1078.7	1076	3.2	1.3	32	0.107	28.1	135	23	2	0	0.265712	0.284311
2	9.47	125	1073.3	1078.7	1076	3.2	1.3	32	0.107	28.1	135	23	2	0	0.265712	0.417167
3	9.47	125	1073.3	1078.7	1076	3.2	1.3	32	0.107	28.1	135	23	2	0	0.265712	0.749307
4	9.47	125	1073.3	1078.7	1076	3.2	1.3	32	0.107	28.1	135	23	2	0	0.265712	0.746649
1	9.47	125	1081.2	1089.2	1085.2	4.1	1.2	32	0.179	28.2	135	23	2	0	0.410315	0.439037
2	9.47	125	1081.2	1089.2	1085.2	4.1	1.2	32	0.179	28.2	135	23	2	0	0.410315	0.644195
3	9.47	125	1081.2	1089.2	1085.2	4.1	1.2	32	0.179	28.2	135	23	2	0	0.410315	1.15709
4	9.47	125	1081.2	1089.2	1085.2	4.1	1.2	32	0.179	28.2	135	23	2	0	0.410315	1.15299
1	9.47	125	1090.6	1093.3	1091.95	2.1	0.5	26	0.08	28.4	55	9	1	0	0.0764088	0.0817574
2	9.47	125	1090.6	1093.3	1091.95	2.1	0.5	26	0.08	28.4	55	9	1	0	0.0764088	0.119962
3	9.47	125	1090.6	1093.3	1091.95	2.1	0.5	26	0.08	28.4	55	9	1	0	0.0764088	0.215473
4	9.47	125	1090.6	1093.3	1091.95	2.1	0.5	26	0.08	28.4	55	9	1	0	0.0764088	0.214709
1	10.56	125	1025.7	1033.2	1029.45	6.5	5.5	31	0.696	30	139.98	23	2	91.6967	0.813533	1.04946
2	10.56	125	1025.7	1033.2	1029.45	6.5	5.5	31	0.696	30	139.98	23	2	91.6967	0.813533	4.91374
3	10.56	125	1025.7	1033.2	1029.45	6.5	5.5	31	0.696	30	139.98	23	2	91.6967	0.813533	3.36803
1	9.84	125	912.7	917	914.85	3.4	0.8	27	0.327	31.5	215	37	2	89.6024	0.0373672	0.237655
2	9.84	125	912.7	917	914.85	3.4	0.8	27	0.327	31.5	215	37	2	89.6024	0.0373672	0.388245
1	9.84	125	925.7	929.2	927.45	2.3	1.2	25	1.15	32	185	31	2	89.6024	0.19712	1.25369
2	9.84	125	925.7	929.2	927.45	2.3	1.2	25	1.15	32	185	31	2	89.6024	0.19712	2.04808
1	9.84	125	930.5	941	935.75	6.2	3.6	25	1.051	31.9	165	27	2	89.6024	0.540453	3.43728
2	9.84	125	930.5	941	935.75	6.2	3.6	25	1.051	31.9	165	27	2	89.6024	0.540453	5.6153
1	9.84	125	942.4	946.9	944.65	3.3	1.3	27	1.212	32.2	190	31	2	89.6024	0.22506	1.43138
2	9.84	125	942.4	946.9	944.65	3.3	1.3	27	1.212	32.2	190	31	2	89.6024	0.22506	2.33837
1	9.41	125	1033	1036.7	1034.85	3.7	3	26.8	0.573	30.7	91.56	15	1	97.3391	0.493937	2.9488
2	9.41	125	1033	1036.7	1034.85	3.7	3	26.8	0.573	30.7	91.56	15	1	97.3391	0.493937	2.87471
1	9.41	125	1048.5	1055.1	1051.8	5.5	3.4	31.6	0.518	30.4	177.84	29	2	97.3391	0.506063	3.0212
2	9.41	125	1048.5	1055.1	1051.8	5.5	3.4	31.6	0.518	30.4	177.84	29	2	97.3391	0.506063	2.94529
1	9.51	150	1005.9	1015.1	1010.5	7.6	2.9	32	0.693	30.8	294.44	49	2	91.3271	0.244846	0.0954901
1	9.51	150	1018.8	1031.7	1025.25	9.5	7.1	31	0.873	30.8	294.44	49	2	91.3271	0.755154	0.29451
1	10.34	125	1026.8	1027.4	1027.1	0.6	0.6	28	0.14	29.4	59.52	9	1	73.9558	0.00738721	0.0191329
1	10.34	125	1031	1040.2	1035.6	8	7.3	28	0.79	30.1	188.2	29	2	73.9558	0.507167	1.31356
1	10.34	125	1041.4	1047.5	1044.45	4.9	3	30	0.63	29.8	96.88	15	1	73.9558	0.166212	0.43049
1	10.34	125	1049.5	1055.7	1052.6	6.2	4.9	30	0.7	29.4	77.84	12	1	73.9558	0.301645	0.781259
1	10.34	125	1057	1061.3	1059.15	2.7	1	31	0.2	30.1	150.53	23	2	73.9558	0.0175886	0.0455545
1	8.95	125	859.6	872	865.8	10.9	8.4	0	0.062	31.6	215.2	37	2	93.2311	0.27994	0.226751
2	8.95	125	859.6	872	865.8	10.9	8.4	0	0.062	31.6	215.2	37	2	93.2311	0.27994	1.79721
1	10.51	125	925.4	932.9	929.15	6.5	4.7	31	1.177	31.3	179.48	23	2	89.9334	0.414813	1.04118
1	9.17	150	854.4	865.7	860.05	9.1	5.5	30	1.484	31.7	184.9	33	2	94.0612	0.571433	2.00573
1	9.17	150	867.8	872.9	870.35	4.6	3.6	31	0.872	29.6	254.98	47	2	94.0612	0.21978	0.771426
1	9.17	150	873.8	877.7	875.75	3.9	3.7	25	0.806	31.7	94.92	15	1	94.0612	0.208788	0.732845
1	10.32	125	1097	1106.8	1101.9	9.6	6.4	34	0.63	30.5	108.54	17	2	98.1148	0.797437	1.28387
1	8.76	150	882.3	890.2	886.25	7.9	6.4	26	1.252	31.7	105	17	2	91.8611	0.624123	13.3063
