# Supplementary material for: Data-driven intelligent productivity prediction model for horizontal fracture stimulation
Source: Frontiers journal article supplement (doi:10.3389/feart.2025.1601363), 2025-08-01
Supplement: Table_7.xlsx [file Table_7.xlsx]

## Sheet: GBRT
well ID	Construction date		well section	Post-fracture duration(mon)	Days of production	Daily oil production	Daily water production	Monthly oil production	Monthly water production	water content	well ID	Clustering results	Displacement method (Dummy Variables1)	Displacement method (Dummy Variables2)	Fracturing process (dummy variable 1)	Fracturing process (dummy variable 1)	present fomraiton pressure(MPa)	well spacing(m)	depth at the top(m)	oil bed depth(m)	Depth of the central part of the oil layer(m)	Sandstone thickness(m)	Effective thickness(m)	Porosity(%)	permeability(μm)	Breakdown pressure(MPa)	Total liquid volume(m^3)	quantity of sand added(m^3)	Number of fracture slits (slits)	Daily oil production from small layer before fracturing (t)	Daily water production from small layer before fracturing (t)	Monthly oil production from small layer before fracturing (t)	Monthly water production from small layer before fracturing (t)	pre-fracture water content(%)	Daily oil production from small layers after fracturing (t)	Daily water production from small layer after fracturing (t)	Post-fracture water content(%)
yHWglq1091	2018-03-30	201804	S2_3-S2_5+6	1	10.75	9.65	107.92	104	1160	91.7921	yHWglq1091	0	1	0	0	0	7.89	225	1127.1	1134.2	1130.65	3.8	2.7	29.5	0.22	38	340	50	1	0.46871	14.9356	6.30956	209.117	96.9573	8.69818	97.2754	91.7921
yHWglq1091	2018-03-30	201805	S2_3-S2_5+6	2	30.77	8.88	104.3	273	3209	92.1541	yHWglq1091	0	1	0	0	0	7.89	225	1127.1	1134.2	1130.65	3.8	2.7	29.5	0.22	38	340	50	1	0.46871	14.9356	6.30956	209.117	96.9573	8.00413	94.0124	92.1541
yHWglq1091	2018-03-30	201806	S2_3-S2_5+6	3	29.63	6.17	71.92	183	2131	92.0989	yHWglq1091	0	1	0	0	0	7.89	225	1127.1	1134.2	1130.65	3.8	2.7	29.5	0.22	38	340	50	1	0.46871	14.9356	6.30956	209.117	96.9573	5.56143	64.8262	92.0989
yHWglq1091	2018-03-30	201807	S2_3-S2_5+6	4	20.96	3.83	78.81	80	1652	95.3654	yHWglq1091	0	1	0	0	0	7.89	225	1127.1	1134.2	1130.65	3.8	2.7	29.5	0.22	38	340	50	1	0.46871	14.9356	6.30956	209.117	96.9573	3.45223	71.0366	95.3654
yHWglq1091	2018-03-30	201808	S2_3-S2_5+6	5	23.04	2.85	70.2	64	1597	96.0986	yHWglq1091	0	1	0	0	0	7.89	225	1127.1	1134.2	1130.65	3.8	2.7	29.5	0.22	38	340	50	1	0.46871	14.9356	6.30956	209.117	96.9573	2.56889	63.2759	96.0986
yHWglq1091	2018-03-30	201809	S2_3-S2_5+6	6	30	1.9	51.89	57	1557	96.4677	yHWglq1091	0	1	0	0	0	7.89	225	1127.1	1134.2	1130.65	3.8	2.7	29.5	0.22	38	340	50	1	0.46871	14.9356	6.30956	209.117	96.9573	1.71259	46.7719	96.4677
yHWglq1091	2018-03-30	201810	S2_3-S2_5+6	7	30.8	1.93	46.39	59	1429	96.0058	yHWglq1091	0	1	0	0	0	7.89	225	1127.1	1134.2	1130.65	3.8	2.7	29.5	0.22	38	340	50	1	0.46871	14.9356	6.30956	209.117	96.9573	1.73964	41.8144	96.0058
yHWglq1091	2018-03-30	201811	S2_3-S2_5+6	8	29.76	1.69	44.03	50	1310	96.3036	yHWglq1091	0	1	0	0	0	7.89	225	1127.1	1134.2	1130.65	3.8	2.7	29.5	0.22	38	340	50	1	0.46871	14.9356	6.30956	209.117	96.9573	1.52331	39.6871	96.3036
yHWglq1091	2018-03-30	201812	S2_3-S2_5+6	9	30.88	0.87	38.63	27	1193	97.7975	yHWglq1091	0	1	0	0	0	7.89	225	1127.1	1134.2	1130.65	3.8	2.7	29.5	0.22	38	340	50	1	0.46871	14.9356	6.30956	209.117	96.9573	0.784188	34.8198	97.7975
yHWglq1091	2018-03-30	201901	S2_3-S2_5+6	10	31	0.64	38.23	20	1185	98.3535	yHWglq1091	0	1	0	0	0	7.89	225	1127.1	1134.2	1130.65	3.8	2.7	29.5	0.22	38	340	50	1	0.46871	14.9356	6.30956	209.117	96.9573	0.576874	34.4592	98.3535
yHWglq1091	2018-03-30	201902	S2_3-S2_5+6	11	28	1.15	38.6	32	1081	97.1069	yHWglq1091	0	1	0	0	0	7.89	225	1127.1	1134.2	1130.65	3.8	2.7	29.5	0.22	38	340	50	1	0.46871	14.9356	6.30956	209.117	96.9573	1.03657	34.7927	97.1069
yHWglq1091	2018-03-30	201903	S2_3-S2_5+6	12	31	1.32	38.06	41	1180	96.648	yHWglq1091	0	1	0	0	0	7.89	225	1127.1	1134.2	1130.65	3.8	2.7	29.5	0.22	38	340	50	1	0.46871	14.9356	6.30956	209.117	96.9573	1.1898	34.306	96.648
yHWglq1091	2018-03-30	201804	S2_14	1	10.75	9.65	107.92	104	1160	91.7921	yHWglq1091	0	1	0	0	0	7.89	225	1162.4	1163.3	1162.85	1.3	0.5	29.8	0.13	53	380	50	1	0.0512898	1.63437	0.69044	22.8832	96.9573	0.951821	10.6446	91.7921
yHWglq1091	2018-03-30	201805	S2_14	2	30.77	8.88	104.3	273	3209	92.1541	yHWglq1091	0	1	0	0	0	7.89	225	1162.4	1163.3	1162.85	1.3	0.5	29.8	0.13	53	380	50	1	0.0512898	1.63437	0.69044	22.8832	96.9573	0.875873	10.2876	92.1541
yHWglq1091	2018-03-30	201806	S2_14	3	29.63	6.17	71.92	183	2131	92.0989	yHWglq1091	0	1	0	0	0	7.89	225	1162.4	1163.3	1162.85	1.3	0.5	29.8	0.13	53	380	50	1	0.0512898	1.63437	0.69044	22.8832	96.9573	0.608574	7.09378	92.0989
yHWglq1091	2018-03-30	201807	S2_14	4	20.96	3.83	78.81	80	1652	95.3654	yHWglq1091	0	1	0	0	0	7.89	225	1162.4	1163.3	1162.85	1.3	0.5	29.8	0.13	53	380	50	1	0.0512898	1.63437	0.69044	22.8832	96.9573	0.377769	7.77337	95.3654
yHWglq1091	2018-03-30	201808	S2_14	5	23.04	2.85	70.2	64	1597	96.0986	yHWglq1091	0	1	0	0	0	7.89	225	1162.4	1163.3	1162.85	1.3	0.5	29.8	0.13	53	380	50	1	0.0512898	1.63437	0.69044	22.8832	96.9573	0.281108	6.92413	96.0986
yHWglq1091	2018-03-30	201809	S2_14	6	30	1.9	51.89	57	1557	96.4677	yHWglq1091	0	1	0	0	0	7.89	225	1162.4	1163.3	1162.85	1.3	0.5	29.8	0.13	53	380	50	1	0.0512898	1.63437	0.69044	22.8832	96.9573	0.187405	5.11813	96.4677
yHWglq1091	2018-03-30	201810	S2_14	7	30.8	1.93	46.39	59	1429	96.0058	yHWglq1091	0	1	0	0	0	7.89	225	1162.4	1163.3	1162.85	1.3	0.5	29.8	0.13	53	380	50	1	0.0512898	1.63437	0.69044	22.8832	96.9573	0.190364	4.57564	96.0058
yHWglq1091	2018-03-30	201811	S2_14	8	29.76	1.69	44.03	50	1310	96.3036	yHWglq1091	0	1	0	0	0	7.89	225	1162.4	1163.3	1162.85	1.3	0.5	29.8	0.13	53	380	50	1	0.0512898	1.63437	0.69044	22.8832	96.9573	0.166692	4.34287	96.3036
yHWglq1091	2018-03-30	201812	S2_14	9	30.88	0.87	38.63	27	1193	97.7975	yHWglq1091	0	1	0	0	0	7.89	225	1162.4	1163.3	1162.85	1.3	0.5	29.8	0.13	53	380	50	1	0.0512898	1.63437	0.69044	22.8832	96.9573	0.0858118	3.81024	97.7975
yHWglq1091	2018-03-30	201901	S2_14	10	31	0.64	38.23	20	1185	98.3535	yHWglq1091	0	1	0	0	0	7.89	225	1162.4	1163.3	1162.85	1.3	0.5	29.8	0.13	53	380	50	1	0.0512898	1.63437	0.69044	22.8832	96.9573	0.0631259	3.77079	98.3535
yHWglq1091	2018-03-30	201902	S2_14	11	28	1.15	38.6	32	1081	97.1069	yHWglq1091	0	1	0	0	0	7.89	225	1162.4	1163.3	1162.85	1.3	0.5	29.8	0.13	53	380	50	1	0.0512898	1.63437	0.69044	22.8832	96.9573	0.113429	3.80728	97.1069
yHWglq1091	2018-03-30	201903	S2_14	12	31	1.32	38.06	41	1180	96.648	yHWglq1091	0	1	0	0	0	7.89	225	1162.4	1163.3	1162.85	1.3	0.5	29.8	0.13	53	380	50	1	0.0512898	1.63437	0.69044	22.8832	96.9573	0.130197	3.75402	96.648
XlWPLw8273	2018-03-08	201804	S1_1	1	29.9	0.53	8.43	16	252	94.0848	XlWPLw8273	0	1	0	0	0	8.18	250	869	871.5	870.25	2.2	1.3	28	0.05	19	94.45	17	1	0.0242021	0.520346	0.691489	14.5789	95.5556	0.0305408	0.485771	94.0848
XlWPLw8273	2018-03-06	201804	S1_1	2	29.9	0.53	8.43	16	252	94.0848	XlWPLw8273	0	1	0	0	0	8.18	250	869	871.5	870.25	2.2	1.3	28	0.05	19	94.45	17	1	0.0242021	0.520346	0.691489	14.5789	95.5556	0.0305408	0.485771	94.0848
XlWPLw8273	2018-03-06	201806	S1_1	3	29.94	0.5	9.07	15	272	94.7753	XlWPLw8273	0	1	0	0	0	8.18	250	869	871.5	870.25	2.2	1.3	28	0.05	19	94.45	17	1	0.0242021	0.520346	0.691489	14.5789	95.5556	0.0288121	0.522651	94.7753
XlWPLw8273	2018-03-08	201806	S1_1	4	29.94	0.5	9.07	15	272	94.7753	XlWPLw8273	0	1	0	0	0	8.18	250	869	871.5	870.25	2.2	1.3	28	0.05	19	94.45	17	1	0.0242021	0.520346	0.691489	14.5789	95.5556	0.0288121	0.522651	94.7753
XlWPLw8273	2018-03-06	201807	S1_1	5	27.23	0.55	10.28	15	280	94.9215	XlWPLw8273	0	1	0	0	0	8.18	250	869	871.5	870.25	2.2	1.3	28	0.05	19	94.45	17	1	0.0242021	0.520346	0.691489	14.5789	95.5556	0.0316933	0.592376	94.9215
XlWPLw8273	2018-03-08	201807	S1_1	6	27.23	0.55	10.28	15	280	94.9215	XlWPLw8273	0	1	0	0	0	8.18	250	869	871.5	870.25	2.2	1.3	28	0.05	19	94.45	17	1	0.0242021	0.520346	0.691489	14.5789	95.5556	0.0316933	0.592376	94.9215
DQeSshjCd7	2018-03-09	201804	G2(20)-G2(*21)	1	30	3	37.43	90	1123	92.5798	DQeSshjCd7	0	1	0	0	0	9.16	106	1162.4	1169.5	1165.95	6.1	2.7	29.6	0.32	55	47.84	6.5	1	0.156726	8.51425	4.37376	238.005	98.1925	1.09344	13.6425	92.5798
DQeSshjCd7	2018-03-09	201805	G2(20)-G2(*21)	2	31	2.18	39.09	68	1212	94.7177	DQeSshjCd7	0	1	0	0	0	9.16	106	1162.4	1169.5	1165.95	6.1	2.7	29.6	0.32	55	47.84	6.5	1	0.156726	8.51425	4.37376	238.005	98.1925	0.794567	14.2475	94.7177
DQeSshjCd7	2018-03-09	201806	G2(20)-G2(*21)	3	29.77	1.72	35.61	51	1060	95.3924	DQeSshjCd7	0	1	0	0	0	9.16	106	1162.4	1169.5	1165.95	6.1	2.7	29.6	0.32	55	47.84	6.5	1	0.156726	8.51425	4.37376	238.005	98.1925	0.626906	12.9791	95.3924
DQeSshjCd7	2018-03-09	201807	G2(20)-G2(*21)	4	30.81	1.4	37.15	43	1145	96.3684	DQeSshjCd7	0	1	0	0	0	9.16	106	1162.4	1169.5	1165.95	6.1	2.7	29.6	0.32	55	47.84	6.5	1	0.156726	8.51425	4.37376	238.005	98.1925	0.510272	13.5404	96.3684
DQeSshjCd7	2018-03-09	201808	G2(20)-G2(*21)	5	31	0.7	36.18	22	1122	98.102	DQeSshjCd7	0	1	0	0	0	9.16	106	1162.4	1169.5	1165.95	6.1	2.7	29.6	0.32	55	47.84	6.5	1	0.156726	8.51425	4.37376	238.005	98.1925	0.255136	13.1869	98.102
DQeSshjCd7	2018-03-09	201809	G2(20)-G2(*21)	6	29.87	1.04	34.08	31	1018	97.0387	DQeSshjCd7	0	1	0	0	0	9.16	106	1162.4	1169.5	1165.95	6.1	2.7	29.6	0.32	55	47.84	6.5	1	0.156726	8.51425	4.37376	238.005	98.1925	0.379059	12.4215	97.0387
DQeSshjCd7	2018-03-09	201810	G2(20)-G2(*21)	7	30.92	0.9	33.18	28	1026	97.3592	DQeSshjCd7	0	1	0	0	0	9.16	106	1162.4	1169.5	1165.95	6.1	2.7	29.6	0.32	55	47.84	6.5	1	0.156726	8.51425	4.37376	238.005	98.1925	0.328032	12.0934	97.3592
DQeSshjCd7	2018-03-09	201811	G2(20)-G2(*21)	8	29.94	0.79	29.38	24	880	97.3815	DQeSshjCd7	0	1	0	0	0	9.16	106	1162.4	1169.5	1165.95	6.1	2.7	29.6	0.32	55	47.84	6.5	1	0.156726	8.51425	4.37376	238.005	98.1925	0.287939	10.7084	97.3815
DQeSshjCd7	2018-03-09	201812	G2(20)-G2(*21)	9	30.83	0.77	30.17	24	930	97.5113	DQeSshjCd7	0	1	0	0	0	9.16	106	1162.4	1169.5	1165.95	6.1	2.7	29.6	0.32	55	47.84	6.5	1	0.156726	8.51425	4.37376	238.005	98.1925	0.28065	10.9964	97.5113
DQeSshjCd7	2018-03-09	201901	G2(20)-G2(*21)	10	30.96	0.72	28.42	22	880	97.5292	DQeSshjCd7	0	1	0	0	0	9.16	106	1162.4	1169.5	1165.95	6.1	2.7	29.6	0.32	55	47.84	6.5	1	0.156726	8.51425	4.37376	238.005	98.1925	0.262426	10.3585	97.5292
DQeSshjCd7	2018-03-09	201902	G2(20)-G2(*21)	11	28	0.66	25.95	18	727	97.5197	DQeSshjCd7	0	1	0	0	0	9.16	106	1162.4	1169.5	1165.95	6.1	2.7	29.6	0.32	55	47.84	6.5	1	0.156726	8.51425	4.37376	238.005	98.1925	0.240557	9.45826	97.5197
DQeSshjCd7	2018-03-09	201903	G2(20)-G2(*21)	12	30.77	0.84	28.95	26	891	97.1803	DQeSshjCd7	0	1	0	0	0	9.16	106	1162.4	1169.5	1165.95	6.1	2.7	29.6	0.32	55	47.84	6.5	1	0.156726	8.51425	4.37376	238.005	98.1925	0.306163	10.5517	97.1803
xymxqZ3445	2018-03-18	201804	SⅡ4-Ⅱ5+6	1	29.91	2.11	30.66	63	917	93.5612	xymxqZ3445	0	1	0	0	0	8.12	175	900.1	906.4	903.25	5.1	2.9	29.4	0.632	29	90	14	1	0.197614	5.64965	0.705765	19.0556	96.6204	0.744582	10.8194	93.5612
xymxqZ3445	2018-03-18	201805	SⅡ4-Ⅱ5+6	2	30.95	1.29	19.3	40	597	93.7348	xymxqZ3445	0	1	0	0	0	8.12	175	900.1	906.4	903.25	5.1	2.9	29.4	0.632	29	90	14	1	0.197614	5.64965	0.705765	19.0556	96.6204	0.455218	6.81063	93.7348
xymxqZ3445	2018-03-18	201806	SⅡ4-Ⅱ5+6	3	29.89	0.91	11.74	27	351	92.8063	xymxqZ3445	0	1	0	0	0	8.12	175	900.1	906.4	903.25	5.1	2.9	29.4	0.632	29	90	14	1	0.197614	5.64965	0.705765	19.0556	96.6204	0.321123	4.14284	92.8063
xymxqZ3445	2018-03-18	201807	SⅡ4-Ⅱ5+6	4	30.86	0.97	14.03	30	433	93.5333	xymxqZ3445	0	1	0	0	0	8.12	175	900.1	906.4	903.25	5.1	2.9	29.4	0.632	29	90	14	1	0.197614	5.64965	0.705765	19.0556	96.6204	0.342296	4.95094	93.5333
xymxqZ3445	2018-03-18	201808	SⅡ4-Ⅱ5+6	5	10.77	0.81	14.15	9	152	94.5856	xymxqZ3445	0	1	0	0	0	8.12	175	900.1	906.4	903.25	5.1	2.9	29.4	0.632	29	90	14	1	0.197614	5.64965	0.705765	19.0556	96.6204	0.285835	4.99328	94.5856
xymxqZ3445	2018-03-18	201809	SⅡ4-Ⅱ5+6	6	12.57	0.62	13.64	8	171	95.6522	xymxqZ3445	0	1	0	0	0	8.12	175	900.1	906.4	903.25	5.1	2.9	29.4	0.632	29	90	14	1	0.197614	5.64965	0.705765	19.0556	96.6204	0.218787	4.81331	95.6522
xymxqZ3445	2018-03-18	201811	SⅡ4-Ⅱ5+6	7	29.92	0.84	13.67	25	409	94.2109	xymxqZ3445	0	1	0	0	0	8.12	175	900.1	906.4	903.25	5.1	2.9	29.4	0.632	29	90	14	1	0.197614	5.64965	0.705765	19.0556	96.6204	0.296421	4.8239	94.2109
xymxqZ3445	2018-03-18	201812	SⅡ4-Ⅱ5+6	8	31	0.9	12.63	28	392	93.3481	xymxqZ3445	0	1	0	0	0	8.12	175	900.1	906.4	903.25	5.1	2.9	29.4	0.632	29	90	14	1	0.197614	5.64965	0.705765	19.0556	96.6204	0.317594	4.4569	93.3481
xymxqZ3445	2018-03-18	201901	SⅡ4-Ⅱ5+6	9	30.92	0.77	12.19	24	377	94.0586	xymxqZ3445	0	1	0	0	0	8.12	175	900.1	906.4	903.25	5.1	2.9	29.4	0.632	29	90	14	1	0.197614	5.64965	0.705765	19.0556	96.6204	0.271719	4.30164	94.0586
xymxqZ3445	2018-03-18	201902	SⅡ4-Ⅱ5+6	10	24.46	0.6	11.89	15	291	95.1962	xymxqZ3445	0	1	0	0	0	8.12	175	900.1	906.4	903.25	5.1	2.9	29.4	0.632	29	90	14	1	0.197614	5.64965	0.705765	19.0556	96.6204	0.211729	4.19577	95.1962
vyuIHr3299	2018-03-27	201804	S1_1	1	27.04	8.88	78.28	240	2117	89.8118	vyuIHr3299	0	1	0	0	0	9.68	175	842.7	845.5	844.1	1.8	0.5	30.2	0.17	44	99.2	15	1	0.108544	1.53587	3.04133	42.8933	93.3992	0.465638	4.10475	89.8118
vyuIHr3299	2018-03-27	201805	S1_1	2	30.72	3.74	76.26	115	2342	95.325	vyuIHr3299	0	1	0	0	0	9.68	175	842.7	845.5	844.1	1.8	0.5	30.2	0.17	44	99.2	15	1	0.108544	1.53587	3.04133	42.8933	93.3992	0.196114	3.99883	95.325
vyuIHr3299	2018-03-27	201806	S1_1	3	30	4.33	75.49	130	2265	94.5753	vyuIHr3299	0	1	0	0	0	9.68	175	842.7	845.5	844.1	1.8	0.5	30.2	0.17	44	99.2	15	1	0.108544	1.53587	3.04133	42.8933	93.3992	0.227051	3.95845	94.5753
vyuIHr3299	2018-03-27	201807	S1_1	4	30.59	4.6	78.21	141	2392	94.4451	vyuIHr3299	0	1	0	0	0	9.68	175	842.7	845.5	844.1	1.8	0.5	30.2	0.17	44	99.2	15	1	0.108544	1.53587	3.04133	42.8933	93.3992	0.241209	4.10108	94.4451
vyuIHr3299	2018-03-27	201808	S1_1	5	31	5.02	79.36	156	2460	94.0507	vyuIHr3299	0	1	0	0	0	9.68	175	842.7	845.5	844.1	1.8	0.5	30.2	0.17	44	99.2	15	1	0.108544	1.53587	3.04133	42.8933	93.3992	0.263233	4.16138	94.0507
vyuIHr3299	2018-03-27	201809	S1_1	6	24.65	5.08	84.56	125	2084	94.3329	vyuIHr3299	0	1	0	0	0	9.68	175	842.7	845.5	844.1	1.8	0.5	30.2	0.17	44	99.2	15	1	0.108544	1.53587	3.04133	42.8933	93.3992	0.266379	4.43405	94.3329
vyuIHr3299	2018-03-27	201810	S1_1	7	30.71	7.36	101.66	226	3122	93.2489	vyuIHr3299	0	1	0	0	0	9.68	175	842.7	845.5	844.1	1.8	0.5	30.2	0.17	44	99.2	15	1	0.108544	1.53587	3.04133	42.8933	93.3992	0.385935	5.33072	93.2489
vyuIHr3299	2018-03-27	201811	S1_1	8	29.88	5.96	95.71	178	2859	94.1379	vyuIHr3299	0	1	0	0	0	9.68	175	842.7	845.5	844.1	1.8	0.5	30.2	0.17	44	99.2	15	1	0.108544	1.53587	3.04133	42.8933	93.3992	0.312523	5.01872	94.1379
vyuIHr3299	2018-03-27	201812	S1_1	9	30.98	7	86.94	217	2694	92.5484	vyuIHr3299	0	1	0	0	0	9.68	175	842.7	845.5	844.1	1.8	0.5	30.2	0.17	44	99.2	15	1	0.108544	1.53587	3.04133	42.8933	93.3992	0.367057	4.55885	92.5484
vyuIHr3299	2018-03-27	201901	S1_1	10	30.71	5.73	86.62	176	2660	93.7953	vyuIHr3299	0	1	0	0	0	9.68	175	842.7	845.5	844.1	1.8	0.5	30.2	0.17	44	99.2	15	1	0.108544	1.53587	3.04133	42.8933	93.3992	0.300463	4.54207	93.7953
vyuIHr3299	2018-03-27	201902	S1_1	11	28	5.07	85.48	142	2393	94.4009	vyuIHr3299	0	1	0	0	0	9.68	175	842.7	845.5	844.1	1.8	0.5	30.2	0.17	44	99.2	15	1	0.108544	1.53587	3.04133	42.8933	93.3992	0.265854	4.48229	94.4009
vyuIHr3299	2018-03-27	201903	S1_1	12	30.97	5.7	84.13	176	2605	93.6547	vyuIHr3299	0	1	0	0	0	9.68	175	842.7	845.5	844.1	1.8	0.5	30.2	0.17	44	99.2	15	1	0.108544	1.53587	3.04133	42.8933	93.3992	0.29889	4.41151	93.6547
vyuIHr3299	2018-03-27	201804	S1_2-S1_3_1	1	27.04	8.88	78.28	240	2117	89.8118	vyuIHr3299	0	1	0	0	0	9.68	175	849.2	852	850.6	1.6	1.1	28.9	0.1	40	98.8	15	1	0.140469	1.9876	3.93584	55.5089	93.3992	0.602591	5.31203	89.8118
vyuIHr3299	2018-03-27	201805	S1_2-S1_3_1	2	30.72	3.74	76.26	115	2342	95.325	vyuIHr3299	0	1	0	0	0	9.68	175	849.2	852	850.6	1.6	1.1	28.9	0.1	40	98.8	15	1	0.140469	1.9876	3.93584	55.5089	93.3992	0.253794	5.17495	95.325
vyuIHr3299	2018-03-27	201806	S1_2-S1_3_1	3	30	4.33	75.49	130	2265	94.5753	vyuIHr3299	0	1	0	0	0	9.68	175	849.2	852	850.6	1.6	1.1	28.9	0.1	40	98.8	15	1	0.140469	1.9876	3.93584	55.5089	93.3992	0.293831	5.1227	94.5753
vyuIHr3299	2018-03-27	201807	S1_2-S1_3_1	4	30.59	4.6	78.21	141	2392	94.4451	vyuIHr3299	0	1	0	0	0	9.68	175	849.2	852	850.6	1.6	1.1	28.9	0.1	40	98.8	15	1	0.140469	1.9876	3.93584	55.5089	93.3992	0.312153	5.30728	94.4451
vyuIHr3299	2018-03-27	201808	S1_2-S1_3_1	5	31	5.02	79.36	156	2460	94.0507	vyuIHr3299	0	1	0	0	0	9.68	175	849.2	852	850.6	1.6	1.1	28.9	0.1	40	98.8	15	1	0.140469	1.9876	3.93584	55.5089	93.3992	0.340654	5.38532	94.0507
vyuIHr3299	2018-03-27	201809	S1_2-S1_3_1	6	24.65	5.08	84.56	125	2084	94.3329	vyuIHr3299	0	1	0	0	0	9.68	175	849.2	852	850.6	1.6	1.1	28.9	0.1	40	98.8	15	1	0.140469	1.9876	3.93584	55.5089	93.3992	0.344725	5.73819	94.3329
vyuIHr3299	2018-03-27	201810	S1_2-S1_3_1	7	30.71	7.36	101.66	226	3122	93.2489	vyuIHr3299	0	1	0	0	0	9.68	175	849.2	852	850.6	1.6	1.1	28.9	0.1	40	98.8	15	1	0.140469	1.9876	3.93584	55.5089	93.3992	0.499445	6.89858	93.2489
vyuIHr3299	2018-03-27	201811	S1_2-S1_3_1	8	29.88	5.96	95.71	178	2859	94.1379	vyuIHr3299	0	1	0	0	0	9.68	175	849.2	852	850.6	1.6	1.1	28.9	0.1	40	98.8	15	1	0.140469	1.9876	3.93584	55.5089	93.3992	0.404442	6.49482	94.1379
vyuIHr3299	2018-03-27	201812	S1_2-S1_3_1	9	30.98	7	86.94	217	2694	92.5484	vyuIHr3299	0	1	0	0	0	9.68	175	849.2	852	850.6	1.6	1.1	28.9	0.1	40	98.8	15	1	0.140469	1.9876	3.93584	55.5089	93.3992	0.475015	5.89969	92.5484
vyuIHr3299	2018-03-27	201901	S1_2-S1_3_1	10	30.71	5.73	86.62	176	2660	93.7953	vyuIHr3299	0	1	0	0	0	9.68	175	849.2	852	850.6	1.6	1.1	28.9	0.1	40	98.8	15	1	0.140469	1.9876	3.93584	55.5089	93.3992	0.388834	5.87798	93.7953
vyuIHr3299	2018-03-27	201902	S1_2-S1_3_1	11	28	5.07	85.48	142	2393	94.4009	vyuIHr3299	0	1	0	0	0	9.68	175	849.2	852	850.6	1.6	1.1	28.9	0.1	40	98.8	15	1	0.140469	1.9876	3.93584	55.5089	93.3992	0.344047	5.80062	94.4009
vyuIHr3299	2018-03-27	201903	S1_2-S1_3_1	12	30.97	5.7	84.13	176	2605	93.6547	vyuIHr3299	0	1	0	0	0	9.68	175	849.2	852	850.6	1.6	1.1	28.9	0.1	40	98.8	15	1	0.140469	1.9876	3.93584	55.5089	93.3992	0.386798	5.70901	93.6547
vyuIHr3299	2018-03-27	201804	P1_3-P1_4	1	27.04	8.88	78.28	240	2117	89.8118	vyuIHr3299	0	1	0	0	0	9.68	175	969.6	976.1	972.85	2.7	0.7	29.6	0.18	42	99.45	15	1	0.160901	2.27671	4.50833	63.583	93.3992	0.690241	6.08469	89.8118
vyuIHr3299	2018-03-27	201805	P1_3-P1_4	2	30.72	3.74	76.26	115	2342	95.325	vyuIHr3299	0	1	0	0	0	9.68	175	969.6	976.1	972.85	2.7	0.7	29.6	0.18	42	99.45	15	1	0.160901	2.27671	4.50833	63.583	93.3992	0.290709	5.92767	95.325
vyuIHr3299	2018-03-27	201806	P1_3-P1_4	3	30	4.33	75.49	130	2265	94.5753	vyuIHr3299	0	1	0	0	0	9.68	175	969.6	976.1	972.85	2.7	0.7	29.6	0.18	42	99.45	15	1	0.160901	2.27671	4.50833	63.583	93.3992	0.33657	5.86782	94.5753
vyuIHr3299	2018-03-27	201807	P1_3-P1_4	4	30.59	4.6	78.21	141	2392	94.4451	vyuIHr3299	0	1	0	0	0	9.68	175	969.6	976.1	972.85	2.7	0.7	29.6	0.18	42	99.45	15	1	0.160901	2.27671	4.50833	63.583	93.3992	0.357557	6.07925	94.4451
vyuIHr3299	2018-03-27	201808	P1_3-P1_4	5	31	5.02	79.36	156	2460	94.0507	vyuIHr3299	0	1	0	0	0	9.68	175	969.6	976.1	972.85	2.7	0.7	29.6	0.18	42	99.45	15	1	0.160901	2.27671	4.50833	63.583	93.3992	0.390204	6.16864	94.0507
vyuIHr3299	2018-03-27	201809	P1_3-P1_4	6	24.65	5.08	84.56	125	2084	94.3329	vyuIHr3299	0	1	0	0	0	9.68	175	969.6	976.1	972.85	2.7	0.7	29.6	0.18	42	99.45	15	1	0.160901	2.27671	4.50833	63.583	93.3992	0.394867	6.57283	94.3329
vyuIHr3299	2018-03-27	201810	P1_3-P1_4	7	30.71	7.36	101.66	226	3122	93.2489	vyuIHr3299	0	1	0	0	0	9.68	175	969.6	976.1	972.85	2.7	0.7	29.6	0.18	42	99.45	15	1	0.160901	2.27671	4.50833	63.583	93.3992	0.572091	7.90201	93.2489
vyuIHr3299	2018-03-27	201811	P1_3-P1_4	8	29.88	5.96	95.71	178	2859	94.1379	vyuIHr3299	0	1	0	0	0	9.68	175	969.6	976.1	972.85	2.7	0.7	29.6	0.18	42	99.45	15	1	0.160901	2.27671	4.50833	63.583	93.3992	0.46327	7.43952	94.1379
vyuIHr3299	2018-03-27	201812	P1_3-P1_4	9	30.98	7	86.94	217	2694	92.5484	vyuIHr3299	0	1	0	0	0	9.68	175	969.6	976.1	972.85	2.7	0.7	29.6	0.18	42	99.45	15	1	0.160901	2.27671	4.50833	63.583	93.3992	0.544109	6.75783	92.5484
vyuIHr3299	2018-03-27	201901	P1_3-P1_4	10	30.71	5.73	86.62	176	2660	93.7953	vyuIHr3299	0	1	0	0	0	9.68	175	969.6	976.1	972.85	2.7	0.7	29.6	0.18	42	99.45	15	1	0.160901	2.27671	4.50833	63.583	93.3992	0.445392	6.73295	93.7953
vyuIHr3299	2018-03-27	201902	P1_3-P1_4	11	28	5.07	85.48	142	2393	94.4009	vyuIHr3299	0	1	0	0	0	9.68	175	969.6	976.1	972.85	2.7	0.7	29.6	0.18	42	99.45	15	1	0.160901	2.27671	4.50833	63.583	93.3992	0.39409	6.64434	94.4009
vyuIHr3299	2018-03-27	201903	P1_3-P1_4	12	30.97	5.7	84.13	176	2605	93.6547	vyuIHr3299	0	1	0	0	0	9.68	175	969.6	976.1	972.85	2.7	0.7	29.6	0.18	42	99.45	15	1	0.160901	2.27671	4.50833	63.583	93.3992	0.44306	6.53941	93.6547
mhRviU3618	2018-03-24	201805	SⅠ1	1	30.43	4.64	65.87	141	2004	93.4194	mhRviU3618	0	1	0	0	0	7.88	175	887.8	889.4	888.6	1.6	0.2	26.9	0.082	0	98.88	15	1	0.0372614	0.203944	0.165606	0.919115	84.552	0.0384207	0.545425	93.4194
mhRviU3618	2018-03-24	201806	SⅠ1	2	29.96	5.27	73.97	158	2216	93.3493	mhRviU3618	0	1	0	0	0	7.88	175	887.8	889.4	888.6	1.6	0.2	26.9	0.082	0	98.88	15	1	0.0372614	0.203944	0.165606	0.919115	84.552	0.0436373	0.612495	93.3493
mhRviU3618	2018-03-24	201807	SⅠ1	3	31	5.1	69.85	158	2165	93.1955	mhRviU3618	0	1	0	0	0	7.88	175	887.8	889.4	888.6	1.6	0.2	26.9	0.082	0	98.88	15	1	0.0372614	0.203944	0.165606	0.919115	84.552	0.0422296	0.57838	93.1955
mhRviU3618	2018-03-24	201808	SⅠ1	4	27.17	6.09	86.13	166	2340	93.3962	mhRviU3618	0	1	0	0	0	7.88	175	887.8	889.4	888.6	1.6	0.2	26.9	0.082	0	98.88	15	1	0.0372614	0.203944	0.165606	0.919115	84.552	0.0504271	0.713184	93.3962
mhRviU3618	2018-03-24	201809	SⅠ1	5	29.9	7.37	108.39	221	3241	93.6334	mhRviU3618	0	1	0	0	0	7.88	175	887.8	889.4	888.6	1.6	0.2	26.9	0.082	0	98.88	15	1	0.0372614	0.203944	0.165606	0.919115	84.552	0.061026	0.897504	93.6334
mhRviU3618	2018-03-24	201810	SⅠ1	6	30.56	5.02	101.96	153	3115	95.3075	mhRviU3618	0	1	0	0	0	7.88	175	887.8	889.4	888.6	1.6	0.2	26.9	0.082	0	98.88	15	1	0.0372614	0.203944	0.165606	0.919115	84.552	0.0415672	0.844261	95.3075
mhRviU3618	2018-03-24	201811	SⅠ1	7	29.96	5.29	90.75	158	2719	94.4919	mhRviU3618	0	1	0	0	0	7.88	175	887.8	889.4	888.6	1.6	0.2	26.9	0.082	0	98.88	15	1	0.0372614	0.203944	0.165606	0.919115	84.552	0.0438029	0.751439	94.4919
mhRviU3618	2018-03-24	201812	SⅠ1	8	30.98	5.35	83.6	166	2590	93.9854	mhRviU3618	0	1	0	0	0	7.88	175	887.8	889.4	888.6	1.6	0.2	26.9	0.082	0	98.88	15	1	0.0372614	0.203944	0.165606	0.919115	84.552	0.0442997	0.692235	93.9854
mhRviU3618	2018-03-24	201901	SⅠ1	9	31	4.58	80.78	142	2504	94.6345	mhRviU3618	0	1	0	0	0	7.88	175	887.8	889.4	888.6	1.6	0.2	26.9	0.082	0	98.88	15	1	0.0372614	0.203944	0.165606	0.919115	84.552	0.0379239	0.668884	94.6345
mhRviU3618	2018-03-24	201902	SⅠ1	10	27.94	4.6	80.3	129	2244	94.5819	mhRviU3618	0	1	0	0	0	7.88	175	887.8	889.4	888.6	1.6	0.2	26.9	0.082	0	98.88	15	1	0.0372614	0.203944	0.165606	0.919115	84.552	0.0380895	0.66491	94.5819
mhRviU3618	2018-03-24	201903	SⅠ1	11	30.96	4.92	80.52	152	2493	94.2416	mhRviU3618	0	1	0	0	0	7.88	175	887.8	889.4	888.6	1.6	0.2	26.9	0.082	0	98.88	15	1	0.0372614	0.203944	0.165606	0.919115	84.552	0.0407392	0.666731	94.2416
fawaQk2822	2018-03-25	201804	SⅠ2-SⅠ4+5	1	29.83	4.27	24.02	127	717	84.9063	fawaQk2822	0	1	0	0	0	8.88	175	873.7	884.2	878.95	7	3.4	29.6	0.376	27	145	25	2	0.452984	2.47172	12.8017	68.9324	84.5118	4.20487	23.6536	84.9063
fawaQk2822	2018-03-25	201805	SⅠ2-SⅠ4+5	2	30.92	3.85	19.41	119	600	83.448	fawaQk2822	0	1	0	0	0	8.88	175	873.7	884.2	878.95	7	3.4	29.6	0.376	27	145	25	2	0.452984	2.47172	12.8017	68.9324	84.5118	3.79128	19.114	83.448
fawaQk2822	2018-03-25	201806	SⅠ2-SⅠ4+5	3	30	2.44	12.3	73	369	83.4464	fawaQk2822	0	1	0	0	0	8.88	175	873.7	884.2	878.95	7	3.4	29.6	0.376	27	145	25	2	0.452984	2.47172	12.8017	68.9324	84.5118	2.40279	12.1124	83.4464
fawaQk2822	2018-03-25	201807	SⅠ2-SⅠ4+5	4	21.54	2.21	11.67	48	251	84.0778	fawaQk2822	0	1	0	0	0	8.88	175	873.7	884.2	878.95	7	3.4	29.6	0.376	27	145	25	2	0.452984	2.47172	12.8017	68.9324	84.5118	2.17629	11.492	84.0778
fawaQk2822	2018-03-25	201808	SⅠ2-SⅠ4+5	5	11	2.12	11.12	23	122	83.9879	fawaQk2822	0	1	0	0	0	8.88	175	873.7	884.2	878.95	7	3.4	29.6	0.376	27	145	25	2	0.452984	2.47172	12.8017	68.9324	84.5118	2.08767	10.9504	83.9879
fawaQk2822	2018-03-25	201809	SⅠ2-SⅠ4+5	6	20.67	1.66	10.98	34	227	86.8671	fawaQk2822	0	1	0	0	0	8.88	175	873.7	884.2	878.95	7	3.4	29.6	0.376	27	145	25	2	0.452984	2.47172	12.8017	68.9324	84.5118	1.63468	10.8125	86.8671
fawaQk2822	2018-03-25	201810	SⅠ2-SⅠ4+5	7	31	1.25	11.05	39	342	89.8374	fawaQk2822	0	1	0	0	0	8.88	175	873.7	884.2	878.95	7	3.4	29.6	0.376	27	145	25	2	0.452984	2.47172	12.8017	68.9324	84.5118	1.23094	10.8815	89.8374
fawaQk2822	2018-03-25	201811	SⅠ2-SⅠ4+5	8	29.88	1.37	11.13	41	333	89.04	fawaQk2822	0	1	0	0	0	8.88	175	873.7	884.2	878.95	7	3.4	29.6	0.376	27	145	25	2	0.452984	2.47172	12.8017	68.9324	84.5118	1.3491	10.9602	89.04
fawaQk2822	2018-03-25	201812	SⅠ2-SⅠ4+5	9	31	1.57	10.95	49	339	87.4601	fawaQk2822	0	1	0	0	0	8.88	175	873.7	884.2	878.95	7	3.4	29.6	0.376	27	145	25	2	0.452984	2.47172	12.8017	68.9324	84.5118	1.54605	10.783	87.4601
fawaQk2822	2018-03-25	201901	SⅠ2-SⅠ4+5	10	30.96	1.23	10.27	38	318	89.3043	fawaQk2822	0	1	0	0	0	8.88	175	873.7	884.2	878.95	7	3.4	29.6	0.376	27	145	25	2	0.452984	2.47172	12.8017	68.9324	84.5118	1.21124	10.1134	89.3043
fawaQk2822	2018-03-25	201903	SⅠ2-SⅠ4+5	11	30.99	0.7	12.85	22	398	94.8339	fawaQk2822	0	1	0	0	0	8.88	175	873.7	884.2	878.95	7	3.4	29.6	0.376	27	145	25	2	0.452984	2.47172	12.8017	68.9324	84.5118	0.689324	12.654	94.8339
swIAaf8267	2018-03-25	201804	S1_1- S1_2_4	1	29.63	2.95	51.52	87	1526	94.5842	swIAaf8267	0	1	0	0	0	10.26	175	918.8	927.3	923.05	4.5	1	27	0.304	27	92.7	14	1	0.318126	6.0444	9.08932	168.91	95	1.11723	19.5117	94.5842
swIAaf8267	2018-03-23	201805	S1_1-S1_2_4	2	30.9	2.63	42.54	81	1314	94.1776	swIAaf8267	0	1	0	0	0	10.26	175	918.8	927.3	923.05	4.5	1	27	0.304	27	92.7	14	1	0.318126	6.0444	9.08932	168.91	95	0.996038	16.1108	94.1776
swIAaf8267	2018-03-25	201806	S1_1-S1_2_4	3	30	2.88	39.9	86	1197	93.2679	swIAaf8267	0	1	0	0	0	10.26	175	918.8	927.3	923.05	4.5	1	27	0.304	27	92.7	14	1	0.318126	6.0444	9.08932	168.91	95	1.09072	15.111	93.2679
swIAaf8267	2018-03-23	201807	S1_1-S1_2_4	4	27.98	2.42	33.55	68	939	93.2722	swIAaf8267	0	1	0	0	0	10.26	175	918.8	927.3	923.05	4.5	1	27	0.304	27	92.7	14	1	0.318126	6.0444	9.08932	168.91	95	0.916507	12.7061	93.2722
swIAaf8267	2018-03-24	202110	S2_13-S3_4	1	30.17	3.82	48.43	115	1461	92.689	swIAaf8267	0	1	0	0	0	10.26	175	992.8	1017.9	1005.35	3.4	0.3	25.4	0.341	49	86.4	13	1	0.107054	2.03402	3.05868	56.8404	95	0.486839	6.17216	92.689
swIAaf8267	2018-03-24	202111	S2_13-S3_4	2	30	3.4	48.37	102	1451	93.4325	swIAaf8267	0	1	0	0	0	10.26	175	992.8	1017.9	1005.35	3.4	0.3	25.4	0.341	49	86.4	13	1	0.107054	2.03402	3.05868	56.8404	95	0.433313	6.16451	93.4325
swIAaf8267	2018-03-23	202112	S2_13-S3_4	3	31	2.93	45.91	91	1423	94.0008	swIAaf8267	0	1	0	0	0	10.26	175	992.8	1017.9	1005.35	3.4	0.3	25.4	0.341	49	86.4	13	1	0.107054	2.03402	3.05868	56.8404	95	0.373413	5.85099	94.0008
swIAaf8267	2018-03-24	202201	S2_13-S3_4	4	30.98	2.49	45.31	77	1404	94.7908	swIAaf8267	0	1	0	0	0	10.26	175	992.8	1017.9	1005.35	3.4	0.3	25.4	0.341	49	86.4	13	1	0.107054	2.03402	3.05868	56.8404	95	0.317338	5.77453	94.7908
HZlIqn2100	2018-04-04	201805	S2_2_2-S2_2_4	1	30.52	2.42	62.88	74	1919	96.294	HZlIqn2100	0	1	0	0	0	12.2	150	1211.6	1216.7	1214.15	4.3	2.5	30	0.51	45	102.15	15	1	0.384082	19.4677	12.0496	598.715	98.0653	1.8225	47.355	96.294
HZlIqn2100	2018-04-04	201806	S2_2_2-S2_2_4	2	29.96	2.32	58.68	69	1758	96.1967	HZlIqn2100	0	1	0	0	0	12.2	150	1211.6	1216.7	1214.15	4.3	2.5	30	0.51	45	102.15	15	1	0.384082	19.4677	12.0496	598.715	98.0653	1.74719	44.192	96.1967
HZlIqn2100	2018-04-04	201807	S2_2_2-S2_2_4	3	30.78	2.16	56.99	66	1754	96.3483	HZlIqn2100	0	1	0	0	0	12.2	150	1211.6	1216.7	1214.15	4.3	2.5	30	0.51	45	102.15	15	1	0.384082	19.4677	12.0496	598.715	98.0653	1.6267	42.9192	96.3483
HZlIqn2100	2018-04-04	201808	S2_2_2-S2_2_4	4	30.42	1.63	53.83	50	1637	97.0609	HZlIqn2100	0	1	0	0	0	12.2	150	1211.6	1216.7	1214.15	4.3	2.5	30	0.51	45	102.15	15	1	0.384082	19.4677	12.0496	598.715	98.0653	1.22755	40.5394	97.0609
HZlIqn2100	2018-04-04	201809	S2_2_2-S2_2_4	5	29.81	1.87	53.71	56	1601	96.6355	HZlIqn2100	0	1	0	0	0	12.2	150	1211.6	1216.7	1214.15	4.3	2.5	30	0.51	45	102.15	15	1	0.384082	19.4677	12.0496	598.715	98.0653	1.4083	40.4491	96.6355
HZlIqn2100	2018-04-04	201810	S2_2_2-S2_2_4	6	30.83	1.33	52.98	41	1634	97.5511	HZlIqn2100	0	1	0	0	0	12.2	150	1211.6	1216.7	1214.15	4.3	2.5	30	0.51	45	102.15	15	1	0.384082	19.4677	12.0496	598.715	98.0653	1.00162	39.8993	97.5511
HZlIqn2100	2018-04-04	201812	S2_2_2-S2_2_4	7	31	0.59	49.05	18	1521	98.8114	HZlIqn2100	0	1	0	0	0	12.2	150	1211.6	1216.7	1214.15	4.3	2.5	30	0.51	45	102.15	15	1	0.384082	19.4677	12.0496	598.715	98.0653	0.44433	36.9396	98.8114
HZlIqn2100	2018-04-04	201902	S2_2_2-S2_2_4	8	20.06	0.53	47.96	11	962	98.907	HZlIqn2100	0	1	0	0	0	12.2	150	1211.6	1216.7	1214.15	4.3	2.5	30	0.51	45	102.15	15	1	0.384082	19.4677	12.0496	598.715	98.0653	0.399144	36.1187	98.907
HZlIqn2100	2018-04-04	201805	S2_4	1	30.52	2.42	62.88	74	1919	96.294	HZlIqn2100	0	1	0	0	0	12.2	150	1221	1223.2	1222.1	2.4	0.6	29.7	0.13	48	88.9	13	1	0.0234968	1.19096	0.737153	36.6273	98.0653	0.111494	2.89701	96.294
HZlIqn2100	2018-04-04	201806	S2_4	2	29.96	2.32	58.68	69	1758	96.1967	HZlIqn2100	0	1	0	0	0	12.2	150	1221	1223.2	1222.1	2.4	0.6	29.7	0.13	48	88.9	13	1	0.0234968	1.19096	0.737153	36.6273	98.0653	0.106887	2.70351	96.1967
HZlIqn2100	2018-04-04	201807	S2_4	3	30.78	2.16	56.99	66	1754	96.3483	HZlIqn2100	0	1	0	0	0	12.2	150	1221	1223.2	1222.1	2.4	0.6	29.7	0.13	48	88.9	13	1	0.0234968	1.19096	0.737153	36.6273	98.0653	0.0995157	2.62565	96.3483
HZlIqn2100	2018-04-04	201808	S2_4	4	30.42	1.63	53.83	50	1637	97.0609	HZlIqn2100	0	1	0	0	0	12.2	150	1221	1223.2	1222.1	2.4	0.6	29.7	0.13	48	88.9	13	1	0.0234968	1.19096	0.737153	36.6273	98.0653	0.0750975	2.48006	97.0609
HZlIqn2100	2018-04-04	201809	S2_4	5	29.81	1.87	53.71	56	1601	96.6355	HZlIqn2100	0	1	0	0	0	12.2	150	1221	1223.2	1222.1	2.4	0.6	29.7	0.13	48	88.9	13	1	0.0234968	1.19096	0.737153	36.6273	98.0653	0.0861548	2.47453	96.6355
HZlIqn2100	2018-04-04	201810	S2_4	6	30.83	1.33	52.98	41	1634	97.5511	HZlIqn2100	0	1	0	0	0	12.2	150	1221	1223.2	1222.1	2.4	0.6	29.7	0.13	48	88.9	13	1	0.0234968	1.19096	0.737153	36.6273	98.0653	0.0612758	2.4409	97.5511
HZlIqn2100	2018-04-04	201812	S2_4	7	31	0.59	49.05	18	1521	98.8114	HZlIqn2100	0	1	0	0	0	12.2	150	1221	1223.2	1222.1	2.4	0.6	29.7	0.13	48	88.9	13	1	0.0234968	1.19096	0.737153	36.6273	98.0653	0.0271825	2.25983	98.8114
HZlIqn2100	2018-04-04	201902	S2_4	8	20.06	0.53	47.96	11	962	98.907	HZlIqn2100	0	1	0	0	0	12.2	150	1221	1223.2	1222.1	2.4	0.6	29.7	0.13	48	88.9	13	1	0.0234968	1.19096	0.737153	36.6273	98.0653	0.0244182	2.20962	98.907
HZlIqn2100	2018-04-04	201805	S2_5+6-S2_7	1	30.52	2.42	62.88	74	1919	96.294	HZlIqn2100	0	1	0	0	0	12.2	150	1224.9	1229.3	1227.1	3.8	1.6	29.3	0.2	46	102.15	15	1	0.0963969	4.886	3.02422	150.266	98.0653	0.457413	11.8852	96.294
HZlIqn2100	2018-04-04	201806	S2_5+6-S2_7	2	29.96	2.32	58.68	69	1758	96.1967	HZlIqn2100	0	1	0	0	0	12.2	150	1224.9	1229.3	1227.1	3.8	1.6	29.3	0.2	46	102.15	15	1	0.0963969	4.886	3.02422	150.266	98.0653	0.438512	11.0913	96.1967
HZlIqn2100	2018-04-04	201807	S2_5+6-S2_7	3	30.78	2.16	56.99	66	1754	96.3483	HZlIqn2100	0	1	0	0	0	12.2	150	1224.9	1229.3	1227.1	3.8	1.6	29.3	0.2	46	102.15	15	1	0.0963969	4.886	3.02422	150.266	98.0653	0.408269	10.7719	96.3483
HZlIqn2100	2018-04-04	201808	S2_5+6-S2_7	4	30.42	1.63	53.83	50	1637	97.0609	HZlIqn2100	0	1	0	0	0	12.2	150	1224.9	1229.3	1227.1	3.8	1.6	29.3	0.2	46	102.15	15	1	0.0963969	4.886	3.02422	150.266	98.0653	0.308092	10.1746	97.0609
HZlIqn2100	2018-04-04	201809	S2_5+6-S2_7	5	29.81	1.87	53.71	56	1601	96.6355	HZlIqn2100	0	1	0	0	0	12.2	150	1224.9	1229.3	1227.1	3.8	1.6	29.3	0.2	46	102.15	15	1	0.0963969	4.886	3.02422	150.266	98.0653	0.353455	10.1519	96.6355
HZlIqn2100	2018-04-04	201810	S2_5+6-S2_7	6	30.83	1.33	52.98	41	1634	97.5511	HZlIqn2100	0	1	0	0	0	12.2	150	1224.9	1229.3	1227.1	3.8	1.6	29.3	0.2	46	102.15	15	1	0.0963969	4.886	3.02422	150.266	98.0653	0.251388	10.0139	97.5511
HZlIqn2100	2018-04-04	201812	S2_5+6-S2_7	7	31	0.59	49.05	18	1521	98.8114	HZlIqn2100	0	1	0	0	0	12.2	150	1224.9	1229.3	1227.1	3.8	1.6	29.3	0.2	46	102.15	15	1	0.0963969	4.886	3.02422	150.266	98.0653	0.111518	9.27112	98.8114
HZlIqn2100	2018-04-04	201902	S2_5+6-S2_7	8	20.06	0.53	47.96	11	962	98.907	HZlIqn2100	0	1	0	0	0	12.2	150	1224.9	1229.3	1227.1	3.8	1.6	29.3	0.2	46	102.15	15	1	0.0963969	4.886	3.02422	150.266	98.0653	0.100177	9.06509	98.907
HZlIqn2100	2018-04-04	201805	S2_8	1	30.52	2.42	62.88	74	1919	96.294	HZlIqn2100	0	1	0	0	0	12.2	150	1231.6	1235	1233.3	2.7	0.5	27.8	0.04	46	89.55	13	1	0.00602481	0.305375	0.189014	9.39161	98.0653	0.0285883	0.742823	96.294
HZlIqn2100	2018-04-04	201806	S2_8	2	29.96	2.32	58.68	69	1758	96.1967	HZlIqn2100	0	1	0	0	0	12.2	150	1231.6	1235	1233.3	2.7	0.5	27.8	0.04	46	89.55	13	1	0.00602481	0.305375	0.189014	9.39161	98.0653	0.027407	0.693207	96.1967
HZlIqn2100	2018-04-04	201807	S2_8	3	30.78	2.16	56.99	66	1754	96.3483	HZlIqn2100	0	1	0	0	0	12.2	150	1231.6	1235	1233.3	2.7	0.5	27.8	0.04	46	89.55	13	1	0.00602481	0.305375	0.189014	9.39161	98.0653	0.0255168	0.673243	96.3483
HZlIqn2100	2018-04-04	201808	S2_8	4	30.42	1.63	53.83	50	1637	97.0609	HZlIqn2100	0	1	0	0	0	12.2	150	1231.6	1235	1233.3	2.7	0.5	27.8	0.04	46	89.55	13	1	0.00602481	0.305375	0.189014	9.39161	98.0653	0.0192558	0.635913	97.0609
HZlIqn2100	2018-04-04	201809	S2_8	5	29.81	1.87	53.71	56	1601	96.6355	HZlIqn2100	0	1	0	0	0	12.2	150	1231.6	1235	1233.3	2.7	0.5	27.8	0.04	46	89.55	13	1	0.00602481	0.305375	0.189014	9.39161	98.0653	0.022091	0.634495	96.6355
HZlIqn2100	2018-04-04	201810	S2_8	6	30.83	1.33	52.98	41	1634	97.5511	HZlIqn2100	0	1	0	0	0	12.2	150	1231.6	1235	1233.3	2.7	0.5	27.8	0.04	46	89.55	13	1	0.00602481	0.305375	0.189014	9.39161	98.0653	0.0157118	0.625871	97.5511
HZlIqn2100	2018-04-04	201812	S2_8	7	31	0.59	49.05	18	1521	98.8114	HZlIqn2100	0	1	0	0	0	12.2	150	1231.6	1235	1233.3	2.7	0.5	27.8	0.04	46	89.55	13	1	0.00602481	0.305375	0.189014	9.39161	98.0653	0.00696988	0.579445	98.8114
HZlIqn2100	2018-04-04	201902	S2_8	8	20.06	0.53	47.96	11	962	98.907	HZlIqn2100	0	1	0	0	0	12.2	150	1231.6	1235	1233.3	2.7	0.5	27.8	0.04	46	89.55	13	1	0.00602481	0.305375	0.189014	9.39161	98.0653	0.00626108	0.566568	98.907
hrDCvX1733	2018-04-02	201805	S2_1	1	30.81	2.41	81.01	74	2496	97.111	hrDCvX1733	0	1	0	0	0	9.73	150	1142.8	1145.5	1144.15	2.2	0.9	28.6	0.33	32	76.76	11	1	0.208229	4.8879	6.57565	151.24	95.914	0.880406	29.5941	97.111
hrDCvX1733	2018-04-02	201806	S2_1	2	28.62	2.57	70.13	73	2007	96.4649	hrDCvX1733	0	1	0	0	0	9.73	150	1142.8	1145.5	1144.15	2.2	0.9	28.6	0.33	32	76.76	11	1	0.208229	4.8879	6.57565	151.24	95.914	0.938856	25.6194	96.4649
hrDCvX1733	2018-04-02	201807	S2_1	3	30.94	1.66	68.21	51	2111	97.6242	hrDCvX1733	0	1	0	0	0	9.73	150	1142.8	1145.5	1144.15	2.2	0.9	28.6	0.33	32	76.76	11	1	0.208229	4.8879	6.57565	151.24	95.914	0.606421	24.918	97.6242
hrDCvX1733	2018-04-02	201808	S2_1	4	30.83	1.27	63.17	39	1948	98.0292	hrDCvX1733	0	1	0	0	0	9.73	150	1142.8	1145.5	1144.15	2.2	0.9	28.6	0.33	32	76.76	11	1	0.208229	4.8879	6.57565	151.24	95.914	0.463948	23.0769	98.0292
hrDCvX1733	2018-04-02	201809	S2_1	5	21.92	1.27	66.02	28	1447	98.1126	hrDCvX1733	0	1	0	0	0	9.73	150	1142.8	1145.5	1144.15	2.2	0.9	28.6	0.33	32	76.76	11	1	0.208229	4.8879	6.57565	151.24	95.914	0.463948	24.118	98.1126
hrDCvX1733	2018-04-02	201811	S2_1	6	26.77	0.83	59.84	22	1602	98.6319	hrDCvX1733	0	1	0	0	0	9.73	150	1142.8	1145.5	1144.15	2.2	0.9	28.6	0.33	32	76.76	11	1	0.208229	4.8879	6.57565	151.24	95.914	0.30321	21.8604	98.6319
hrDCvX1733	2018-04-02	201812	S2_1	7	30.98	0.87	60.31	27	1868	98.578	hrDCvX1733	0	1	0	0	0	9.73	150	1142.8	1145.5	1144.15	2.2	0.9	28.6	0.33	32	76.76	11	1	0.208229	4.8879	6.57565	151.24	95.914	0.317823	22.0321	98.578
hrDCvX1733	2018-04-02	201901	S2_1	8	30.52	0.79	59.52	24	1816	98.6901	hrDCvX1733	0	1	0	0	0	9.73	150	1142.8	1145.5	1144.15	2.2	0.9	28.6	0.33	32	76.76	11	1	0.208229	4.8879	6.57565	151.24	95.914	0.288598	21.7435	98.6901
hrDCvX1733	2018-04-02	201902	S2_1	9	27.98	0.78	55.73	22	1559	98.6197	hrDCvX1733	0	1	0	0	0	9.73	150	1142.8	1145.5	1144.15	2.2	0.9	28.6	0.33	32	76.76	11	1	0.208229	4.8879	6.57565	151.24	95.914	0.284945	20.3589	98.6197
hrDCvX1733	2018-04-02	201903	S2_1	10	30.75	0.96	57.19	29	1759	98.3491	hrDCvX1733	0	1	0	0	0	9.73	150	1142.8	1145.5	1144.15	2.2	0.9	28.6	0.33	32	76.76	11	1	0.208229	4.8879	6.57565	151.24	95.914	0.350701	20.8923	98.3491
hrDCvX1733	2018-04-02	201904	S2_1	11	26.34	0.67	57.32	18	1510	98.8446	hrDCvX1733	0	1	0	0	0	9.73	150	1142.8	1145.5	1144.15	2.2	0.9	28.6	0.33	32	76.76	11	1	0.208229	4.8879	6.57565	151.24	95.914	0.24476	20.9398	98.8446
hrDCvX1733	2018-04-02	201805	S2_3-S2_4	1	30.81	2.41	81.01	74	2496	97.111	hrDCvX1733	0	1	0	0	0	9.73	150	1156.9	1162	1159.45	2.3	0.6	25.6	0.292	34	99.9	15	1	0.122834	2.88337	3.87897	89.2162	95.914	0.519351	17.4575	97.111
hrDCvX1733	2018-04-02	201806	S2_3-S2_4	2	28.62	2.57	70.13	73	2007	96.4649	hrDCvX1733	0	1	0	0	0	9.73	150	1156.9	1162	1159.45	2.3	0.6	25.6	0.292	34	99.9	15	1	0.122834	2.88337	3.87897	89.2162	95.914	0.55383	15.1129	96.4649
hrDCvX1733	2018-04-02	201807	S2_3-S2_4	3	30.94	1.66	68.21	51	2111	97.6242	hrDCvX1733	0	1	0	0	0	9.73	150	1156.9	1162	1159.45	2.3	0.6	25.6	0.292	34	99.9	15	1	0.122834	2.88337	3.87897	89.2162	95.914	0.357727	14.6991	97.6242
hrDCvX1733	2018-04-02	201808	S2_3-S2_4	4	30.83	1.27	63.17	39	1948	98.0292	hrDCvX1733	0	1	0	0	0	9.73	150	1156.9	1162	1159.45	2.3	0.6	25.6	0.292	34	99.9	15	1	0.122834	2.88337	3.87897	89.2162	95.914	0.273683	13.613	98.0292
hrDCvX1733	2018-04-02	201809	S2_3-S2_4	5	21.92	1.27	66.02	28	1447	98.1126	hrDCvX1733	0	1	0	0	0	9.73	150	1156.9	1162	1159.45	2.3	0.6	25.6	0.292	34	99.9	15	1	0.122834	2.88337	3.87897	89.2162	95.914	0.273683	14.2272	98.1126
hrDCvX1733	2018-04-02	201811	S2_3-S2_4	6	26.77	0.83	59.84	22	1602	98.6319	hrDCvX1733	0	1	0	0	0	9.73	150	1156.9	1162	1159.45	2.3	0.6	25.6	0.292	34	99.9	15	1	0.122834	2.88337	3.87897	89.2162	95.914	0.178863	12.8954	98.6319
hrDCvX1733	2018-04-02	201812	S2_3-S2_4	7	30.98	0.87	60.31	27	1868	98.578	hrDCvX1733	0	1	0	0	0	9.73	150	1156.9	1162	1159.45	2.3	0.6	25.6	0.292	34	99.9	15	1	0.122834	2.88337	3.87897	89.2162	95.914	0.187483	12.9967	98.578
hrDCvX1733	2018-04-02	201901	S2_3-S2_4	8	30.52	0.79	59.52	24	1816	98.6901	hrDCvX1733	0	1	0	0	0	9.73	150	1156.9	1162	1159.45	2.3	0.6	25.6	0.292	34	99.9	15	1	0.122834	2.88337	3.87897	89.2162	95.914	0.170244	12.8265	98.6901
hrDCvX1733	2018-04-02	201902	S2_3-S2_4	9	27.98	0.78	55.73	22	1559	98.6197	hrDCvX1733	0	1	0	0	0	9.73	150	1156.9	1162	1159.45	2.3	0.6	25.6	0.292	34	99.9	15	1	0.122834	2.88337	3.87897	89.2162	95.914	0.168089	12.0097	98.6197
hrDCvX1733	2018-04-02	201903	S2_3-S2_4	10	30.75	0.96	57.19	29	1759	98.3491	hrDCvX1733	0	1	0	0	0	9.73	150	1156.9	1162	1159.45	2.3	0.6	25.6	0.292	34	99.9	15	1	0.122834	2.88337	3.87897	89.2162	95.914	0.206878	12.3243	98.3491
hrDCvX1733	2018-04-02	201904	S2_3-S2_4	11	26.34	0.67	57.32	18	1510	98.8446	hrDCvX1733	0	1	0	0	0	9.73	150	1156.9	1162	1159.45	2.3	0.6	25.6	0.292	34	99.9	15	1	0.122834	2.88337	3.87897	89.2162	95.914	0.144384	12.3524	98.8446
hrDCvX1733	2018-04-02	201805	S2_15+16	1	30.81	2.41	81.01	74	2496	97.111	hrDCvX1733	0	1	0	0	0	9.73	150	1198.2	1201.2	1199.7	2.9	0.4	28.4	0.054	35	76.38	11	1	0.0151439	0.355483	0.478229	10.9993	95.914	0.0640295	2.1523	97.111
hrDCvX1733	2018-04-02	201806	S2_15+16	2	28.62	2.57	70.13	73	2007	96.4649	hrDCvX1733	0	1	0	0	0	9.73	150	1198.2	1201.2	1199.7	2.9	0.4	28.4	0.054	35	76.38	11	1	0.0151439	0.355483	0.478229	10.9993	95.914	0.0682804	1.86323	96.4649
hrDCvX1733	2018-04-02	201807	S2_15+16	3	30.94	1.66	68.21	51	2111	97.6242	hrDCvX1733	0	1	0	0	0	9.73	150	1198.2	1201.2	1199.7	2.9	0.4	28.4	0.054	35	76.38	11	1	0.0151439	0.355483	0.478229	10.9993	95.914	0.0441033	1.81222	97.6242
hrDCvX1733	2018-04-02	201808	S2_15+16	4	30.83	1.27	63.17	39	1948	98.0292	hrDCvX1733	0	1	0	0	0	9.73	150	1198.2	1201.2	1199.7	2.9	0.4	28.4	0.054	35	76.38	11	1	0.0151439	0.355483	0.478229	10.9993	95.914	0.0337417	1.67832	98.0292
hrDCvX1733	2018-04-02	201809	S2_15+16	5	21.92	1.27	66.02	28	1447	98.1126	hrDCvX1733	0	1	0	0	0	9.73	150	1198.2	1201.2	1199.7	2.9	0.4	28.4	0.054	35	76.38	11	1	0.0151439	0.355483	0.478229	10.9993	95.914	0.0337417	1.75404	98.1126
hrDCvX1733	2018-04-02	201811	S2_15+16	6	26.77	0.83	59.84	22	1602	98.6319	hrDCvX1733	0	1	0	0	0	9.73	150	1198.2	1201.2	1199.7	2.9	0.4	28.4	0.054	35	76.38	11	1	0.0151439	0.355483	0.478229	10.9993	95.914	0.0220517	1.58985	98.6319
hrDCvX1733	2018-04-02	201812	S2_15+16	7	30.98	0.87	60.31	27	1868	98.578	hrDCvX1733	0	1	0	0	0	9.73	150	1198.2	1201.2	1199.7	2.9	0.4	28.4	0.054	35	76.38	11	1	0.0151439	0.355483	0.478229	10.9993	95.914	0.0231144	1.60233	98.578
hrDCvX1733	2018-04-02	201901	S2_15+16	8	30.52	0.79	59.52	24	1816	98.6901	hrDCvX1733	0	1	0	0	0	9.73	150	1198.2	1201.2	1199.7	2.9	0.4	28.4	0.054	35	76.38	11	1	0.0151439	0.355483	0.478229	10.9993	95.914	0.0209889	1.58134	98.6901
hrDCvX1733	2018-04-02	201902	S2_15+16	9	27.98	0.78	55.73	22	1559	98.6197	hrDCvX1733	0	1	0	0	0	9.73	150	1198.2	1201.2	1199.7	2.9	0.4	28.4	0.054	35	76.38	11	1	0.0151439	0.355483	0.478229	10.9993	95.914	0.0207232	1.48065	98.6197
hrDCvX1733	2018-04-02	201903	S2_15+16	10	30.75	0.96	57.19	29	1759	98.3491	hrDCvX1733	0	1	0	0	0	9.73	150	1198.2	1201.2	1199.7	2.9	0.4	28.4	0.054	35	76.38	11	1	0.0151439	0.355483	0.478229	10.9993	95.914	0.0255055	1.51944	98.3491
hrDCvX1733	2018-04-02	201904	S2_15+16	11	26.34	0.67	57.32	18	1510	98.8446	hrDCvX1733	0	1	0	0	0	9.73	150	1198.2	1201.2	1199.7	2.9	0.4	28.4	0.054	35	76.38	11	1	0.0151439	0.355483	0.478229	10.9993	95.914	0.0178007	1.52289	98.8446
hrDCvX1733	2018-04-02	201805	S3_2-S3_3	1	30.81	2.41	81.01	74	2496	97.111	hrDCvX1733	0	1	0	0	0	9.73	150	1206.1	1213.3	1209.7	3.4	2.1	30	0.152	41	103.05	15	1	0.223793	5.25325	7.06716	162.545	95.914	0.946214	31.8061	97.111
hrDCvX1733	2018-04-02	201806	S3_2-S3_3	2	28.62	2.57	70.13	73	2007	96.4649	hrDCvX1733	0	1	0	0	0	9.73	150	1206.1	1213.3	1209.7	3.4	2.1	30	0.152	41	103.05	15	1	0.223793	5.25325	7.06716	162.545	95.914	1.00903	27.5344	96.4649
hrDCvX1733	2018-04-02	201807	S3_2-S3_3	3	30.94	1.66	68.21	51	2111	97.6242	hrDCvX1733	0	1	0	0	0	9.73	150	1206.1	1213.3	1209.7	3.4	2.1	30	0.152	41	103.05	15	1	0.223793	5.25325	7.06716	162.545	95.914	0.651749	26.7806	97.6242
hrDCvX1733	2018-04-02	201808	S3_2-S3_3	4	30.83	1.27	63.17	39	1948	98.0292	hrDCvX1733	0	1	0	0	0	9.73	150	1206.1	1213.3	1209.7	3.4	2.1	30	0.152	41	103.05	15	1	0.223793	5.25325	7.06716	162.545	95.914	0.498627	24.8018	98.0292
hrDCvX1733	2018-04-02	201809	S3_2-S3_3	5	21.92	1.27	66.02	28	1447	98.1126	hrDCvX1733	0	1	0	0	0	9.73	150	1206.1	1213.3	1209.7	3.4	2.1	30	0.152	41	103.05	15	1	0.223793	5.25325	7.06716	162.545	95.914	0.498627	25.9208	98.1126
hrDCvX1733	2018-04-02	201811	S3_2-S3_3	6	26.77	0.83	59.84	22	1602	98.6319	hrDCvX1733	0	1	0	0	0	9.73	150	1206.1	1213.3	1209.7	3.4	2.1	30	0.152	41	103.05	15	1	0.223793	5.25325	7.06716	162.545	95.914	0.325875	23.4944	98.6319
hrDCvX1733	2018-04-02	201812	S3_2-S3_3	7	30.98	0.87	60.31	27	1868	98.578	hrDCvX1733	0	1	0	0	0	9.73	150	1206.1	1213.3	1209.7	3.4	2.1	30	0.152	41	103.05	15	1	0.223793	5.25325	7.06716	162.545	95.914	0.341579	23.6789	98.578
hrDCvX1733	2018-04-02	201901	S3_2-S3_3	8	30.52	0.79	59.52	24	1816	98.6901	hrDCvX1733	0	1	0	0	0	9.73	150	1206.1	1213.3	1209.7	3.4	2.1	30	0.152	41	103.05	15	1	0.223793	5.25325	7.06716	162.545	95.914	0.31017	23.3687	98.6901
hrDCvX1733	2018-04-02	201902	S3_2-S3_3	9	27.98	0.78	55.73	22	1559	98.6197	hrDCvX1733	0	1	0	0	0	9.73	150	1206.1	1213.3	1209.7	3.4	2.1	30	0.152	41	103.05	15	1	0.223793	5.25325	7.06716	162.545	95.914	0.306244	21.8807	98.6197
hrDCvX1733	2018-04-02	201903	S3_2-S3_3	10	30.75	0.96	57.19	29	1759	98.3491	hrDCvX1733	0	1	0	0	0	9.73	150	1206.1	1213.3	1209.7	3.4	2.1	30	0.152	41	103.05	15	1	0.223793	5.25325	7.06716	162.545	95.914	0.376915	22.4539	98.3491
hrDCvX1733	2018-04-02	201904	S3_2-S3_3	11	26.34	0.67	57.32	18	1510	98.8446	hrDCvX1733	0	1	0	0	0	9.73	150	1206.1	1213.3	1209.7	3.4	2.1	30	0.152	41	103.05	15	1	0.223793	5.25325	7.06716	162.545	95.914	0.263055	22.505	98.8446
DQpJje4A9U	2018-04-13	201805	G2_14-G2_15	1	29.77	6.93	87.97	206	2619	92.6976	DQpJje4A9U	0	1	0	0	0	9.87	212	1091.4	1096.3	1093.85	3.6	2.5	27.7	0.305	32	97.8	16	1	0.664573	9.11345	20.5236	281.955	93.2034	3.38639	42.9871	92.6976
DQpJje4A9U	2018-04-13	201806	G2_14-G2_15	2	29.88	8.59	83.93	256	2507	90.7155	DQpJje4A9U	0	1	0	0	0	9.87	212	1091.4	1096.3	1093.85	3.6	2.5	27.7	0.305	32	97.8	16	1	0.664573	9.11345	20.5236	281.955	93.2034	4.19756	41.013	90.7155
DQpJje4A9U	2018-04-13	201807	G2_14-G2_15	3	30.88	7.54	82	233	2532	91.5792	DQpJje4A9U	0	1	0	0	0	9.87	212	1091.4	1096.3	1093.85	3.6	2.5	27.7	0.305	32	97.8	16	1	0.664573	9.11345	20.5236	281.955	93.2034	3.68447	40.0699	91.5792
DQpJje4A9U	2018-04-13	201808	G2_14-G2_15	4	29.69	7.52	85.23	223	2530	91.8922	DQpJje4A9U	0	1	0	0	0	9.87	212	1091.4	1096.3	1093.85	3.6	2.5	27.7	0.305	32	97.8	16	1	0.664573	9.11345	20.5236	281.955	93.2034	3.6747	41.6482	91.8922
DQpJje4A9U	2018-04-13	201809	G2_14-G2_15	5	30	6.45	88.54	194	2656	93.2098	DQpJje4A9U	0	1	0	0	0	9.87	212	1091.4	1096.3	1093.85	3.6	2.5	27.7	0.305	32	97.8	16	1	0.664573	9.11345	20.5236	281.955	93.2034	3.15184	43.2657	93.2098
DQpJje4A9U	2018-04-13	201810	G2_14-G2_15	6	30.91	6.25	91.28	193	2822	93.5917	DQpJje4A9U	0	1	0	0	0	9.87	212	1091.4	1096.3	1093.85	3.6	2.5	27.7	0.305	32	97.8	16	1	0.664573	9.11345	20.5236	281.955	93.2034	3.0541	44.6046	93.5917
DQpJje4A9U	2018-04-13	201811	G2_14-G2_15	7	29.56	7.35	89.52	217	2646	92.4125	DQpJje4A9U	0	1	0	0	0	9.87	212	1091.4	1096.3	1093.85	3.6	2.5	27.7	0.305	32	97.8	16	1	0.664573	9.11345	20.5236	281.955	93.2034	3.59163	43.7446	92.4125
DQpJje4A9U	2018-04-13	201812	G2_14-G2_15	8	31	9.12	97.09	283	3010	91.4132	DQpJje4A9U	0	1	0	0	0	9.87	212	1091.4	1096.3	1093.85	3.6	2.5	27.7	0.305	32	97.8	16	1	0.664573	9.11345	20.5236	281.955	93.2034	4.45655	47.4437	91.4132
DQpJje4A9U	2018-04-13	201901	G2_14-G2_15	9	31	7.05	105.85	218	3281	93.7555	DQpJje4A9U	0	1	0	0	0	9.87	212	1091.4	1096.3	1093.85	3.6	2.5	27.7	0.305	32	97.8	16	1	0.664573	9.11345	20.5236	281.955	93.2034	3.44503	51.7243	93.7555
DQpJje4A9U	2018-04-13	201902	G2_14-G2_15	10	27.93	6.41	102.42	179	2861	94.1101	DQpJje4A9U	0	1	0	0	0	9.87	212	1091.4	1096.3	1093.85	3.6	2.5	27.7	0.305	32	97.8	16	1	0.664573	9.11345	20.5236	281.955	93.2034	3.13229	50.0482	94.1101
DQpJje4A9U	2018-04-13	201903	G2_14-G2_15	11	30.69	5.37	101.82	165	3125	94.9902	DQpJje4A9U	0	1	0	0	0	9.87	212	1091.4	1096.3	1093.85	3.6	2.5	27.7	0.305	32	97.8	16	1	0.664573	9.11345	20.5236	281.955	93.2034	2.62409	49.755	94.9902
DQpJje4A9U	2018-04-13	201904	G2_14-G2_15	12	29.88	3.97	100.81	119	3012	96.2111	DQpJje4A9U	0	1	0	0	0	9.87	212	1091.4	1096.3	1093.85	3.6	2.5	27.7	0.305	32	97.8	16	1	0.664573	9.11345	20.5236	281.955	93.2034	1.93997	49.2615	96.2111
SsWFSL8789	2018-04-24	201805	S1_4+5	1	30.6	2.67	58.03	82	1776	95.6013	SsWFSL8789	0	1	0	0	0	10.07	175	934.1	938.5	936.3	3.1	1.5	28.8	0.699	44	98.55	15	1	0.36506	4.63448	11.3525	143.575	92.6981	0.594335	12.9173	95.6013
SsWFSL8789	2018-04-24	201806	S1_4+5	2	29.92	3.26	65.67	98	1964	95.2706	SsWFSL8789	0	1	0	0	0	10.07	175	934.1	938.5	936.3	3.1	1.5	28.8	0.699	44	98.55	15	1	0.36506	4.63448	11.3525	143.575	92.6981	0.725667	14.618	95.2706
SsWFSL8789	2018-04-24	201807	S1_4+5	3	30.85	3.63	64.63	112	1994	94.6821	SsWFSL8789	0	1	0	0	0	10.07	175	934.1	938.5	936.3	3.1	1.5	28.8	0.699	44	98.55	15	1	0.36506	4.63448	11.3525	143.575	92.6981	0.808028	14.3865	94.6821
SsWFSL8789	2018-04-24	201808	S1_4+5	4	30.88	4.11	59.7	127	1843	93.559	SsWFSL8789	0	1	0	0	0	10.07	175	934.1	938.5	936.3	3.1	1.5	28.8	0.699	44	98.55	15	1	0.36506	4.63448	11.3525	143.575	92.6981	0.914875	13.2891	93.559
SsWFSL8789	2018-04-24	201809	S1_4+5	5	30	4.29	57.52	129	1726	93.0594	SsWFSL8789	0	1	0	0	0	10.07	175	934.1	938.5	936.3	3.1	1.5	28.8	0.699	44	98.55	15	1	0.36506	4.63448	11.3525	143.575	92.6981	0.954942	12.8038	93.0594
SsWFSL8789	2018-04-24	201810	S1_4+5	6	31	3.8	58.29	118	1807	93.8799	SsWFSL8789	0	1	0	0	0	10.07	175	934.1	938.5	936.3	3.1	1.5	28.8	0.699	44	98.55	15	1	0.36506	4.63448	11.3525	143.575	92.6981	0.84587	12.9752	93.8799
SsWFSL8789	2018-04-24	201811	S1_4+5	7	30	3.15	55.86	94	1676	94.6619	SsWFSL8789	0	1	0	0	0	10.07	175	934.1	938.5	936.3	3.1	1.5	28.8	0.699	44	98.55	15	1	0.36506	4.63448	11.3525	143.575	92.6981	0.701181	12.4343	94.6619
SsWFSL8789	2018-04-24	201812	S1_4+5	8	30.85	2.09	51.38	65	1585	96.0913	SsWFSL8789	0	1	0	0	0	10.07	175	934.1	938.5	936.3	3.1	1.5	28.8	0.699	44	98.55	15	1	0.36506	4.63448	11.3525	143.575	92.6981	0.465228	11.437	96.0913
SsWFSL8789	2018-04-24	201903	S1_4+5	9	1.98	1.71	55.28	3	109	96.9995	SsWFSL8789	0	1	0	0	0	10.07	175	934.1	938.5	936.3	3.1	1.5	28.8	0.699	44	98.55	15	1	0.36506	4.63448	11.3525	143.575	92.6981	0.380641	12.3052	96.9995
SsWFSL8789	2018-04-24	201805	S3_3-S3_10	1	30.6	2.67	58.03	82	1776	95.6013	SsWFSL8789	0	1	0	0	0	10.07	175	1014.5	1038.7	1026.6	3.7	0.9	29.1	0.555	44	99.45	15	1	0.173912	2.20784	5.40825	68.3985	92.6981	0.283138	6.15374	95.6013
SsWFSL8789	2018-04-24	201806	S3_3-S3_10	2	29.92	3.26	65.67	98	1964	95.2706	SsWFSL8789	0	1	0	0	0	10.07	175	1014.5	1038.7	1026.6	3.7	0.9	29.1	0.555	44	99.45	15	1	0.173912	2.20784	5.40825	68.3985	92.6981	0.345704	6.96392	95.2706
SsWFSL8789	2018-04-24	201807	S3_3-S3_10	3	30.85	3.63	64.63	112	1994	94.6821	SsWFSL8789	0	1	0	0	0	10.07	175	1014.5	1038.7	1026.6	3.7	0.9	29.1	0.555	44	99.45	15	1	0.173912	2.20784	5.40825	68.3985	92.6981	0.38494	6.85364	94.6821
SsWFSL8789	2018-04-24	201808	S3_3-S3_10	4	30.88	4.11	59.7	127	1843	93.559	SsWFSL8789	0	1	0	0	0	10.07	175	1014.5	1038.7	1026.6	3.7	0.9	29.1	0.555	44	99.45	15	1	0.173912	2.20784	5.40825	68.3985	92.6981	0.435842	6.33084	93.559
SsWFSL8789	2018-04-24	201809	S3_3-S3_10	5	30	4.29	57.52	129	1726	93.0594	SsWFSL8789	0	1	0	0	0	10.07	175	1014.5	1038.7	1026.6	3.7	0.9	29.1	0.555	44	99.45	15	1	0.173912	2.20784	5.40825	68.3985	92.6981	0.45493	6.09966	93.0594
SsWFSL8789	2018-04-24	201810	S3_3-S3_10	6	31	3.8	58.29	118	1807	93.8799	SsWFSL8789	0	1	0	0	0	10.07	175	1014.5	1038.7	1026.6	3.7	0.9	29.1	0.555	44	99.45	15	1	0.173912	2.20784	5.40825	68.3985	92.6981	0.402968	6.18132	93.8799
SsWFSL8789	2018-04-24	201811	S3_3-S3_10	7	30	3.15	55.86	94	1676	94.6619	SsWFSL8789	0	1	0	0	0	10.07	175	1014.5	1038.7	1026.6	3.7	0.9	29.1	0.555	44	99.45	15	1	0.173912	2.20784	5.40825	68.3985	92.6981	0.334039	5.92363	94.6619
SsWFSL8789	2018-04-24	201812	S3_3-S3_10	8	30.85	2.09	51.38	65	1585	96.0913	SsWFSL8789	0	1	0	0	0	10.07	175	1014.5	1038.7	1026.6	3.7	0.9	29.1	0.555	44	99.45	15	1	0.173912	2.20784	5.40825	68.3985	92.6981	0.221632	5.44855	96.0913
SsWFSL8789	2018-04-24	201903	S3_3-S3_10	9	1.98	1.71	55.28	3	109	96.9995	SsWFSL8789	0	1	0	0	0	10.07	175	1014.5	1038.7	1026.6	3.7	0.9	29.1	0.555	44	99.45	15	1	0.173912	2.20784	5.40825	68.3985	92.6981	0.181336	5.86212	96.9995
SsWFSL8789	2018-04-24	201805	P1_4-P1_6	1	30.6	2.67	58.03	82	1776	95.6013	SsWFSL8789	0	1	0	0	0	10.07	175	1060.2	1069	1064.6	3.6	0.9	32.2	0.842	37	99.45	15	1	0.263846	3.34955	8.20496	103.769	92.6981	0.429554	9.33595	95.6013
SsWFSL8789	2018-04-24	201806	P1_4-P1_6	2	29.92	3.26	65.67	98	1964	95.2706	SsWFSL8789	0	1	0	0	0	10.07	175	1060.2	1069	1064.6	3.6	0.9	32.2	0.842	37	99.45	15	1	0.263846	3.34955	8.20496	103.769	92.6981	0.524474	10.5651	95.2706
SsWFSL8789	2018-04-24	201807	P1_4-P1_6	3	30.85	3.63	64.63	112	1994	94.6821	SsWFSL8789	0	1	0	0	0	10.07	175	1060.2	1069	1064.6	3.6	0.9	32.2	0.842	37	99.45	15	1	0.263846	3.34955	8.20496	103.769	92.6981	0.584	10.3978	94.6821
SsWFSL8789	2018-04-24	201808	P1_4-P1_6	4	30.88	4.11	59.7	127	1843	93.559	SsWFSL8789	0	1	0	0	0	10.07	175	1060.2	1069	1064.6	3.6	0.9	32.2	0.842	37	99.45	15	1	0.263846	3.34955	8.20496	103.769	92.6981	0.661223	9.60462	93.559
SsWFSL8789	2018-04-24	201809	P1_4-P1_6	5	30	4.29	57.52	129	1726	93.0594	SsWFSL8789	0	1	0	0	0	10.07	175	1060.2	1069	1064.6	3.6	0.9	32.2	0.842	37	99.45	15	1	0.263846	3.34955	8.20496	103.769	92.6981	0.690182	9.2539	93.0594
SsWFSL8789	2018-04-24	201810	P1_4-P1_6	6	31	3.8	58.29	118	1807	93.8799	SsWFSL8789	0	1	0	0	0	10.07	175	1060.2	1069	1064.6	3.6	0.9	32.2	0.842	37	99.45	15	1	0.263846	3.34955	8.20496	103.769	92.6981	0.61135	9.37778	93.8799
SsWFSL8789	2018-04-24	201811	P1_4-P1_6	7	30	3.15	55.86	94	1676	94.6619	SsWFSL8789	0	1	0	0	0	10.07	175	1060.2	1069	1064.6	3.6	0.9	32.2	0.842	37	99.45	15	1	0.263846	3.34955	8.20496	103.769	92.6981	0.506777	8.98684	94.6619
SsWFSL8789	2018-04-24	201812	P1_4-P1_6	8	30.85	2.09	51.38	65	1585	96.0913	SsWFSL8789	0	1	0	0	0	10.07	175	1060.2	1069	1064.6	3.6	0.9	32.2	0.842	37	99.45	15	1	0.263846	3.34955	8.20496	103.769	92.6981	0.336242	8.26609	96.0913
SsWFSL8789	2018-04-24	201903	P1_4-P1_6	9	1.98	1.71	55.28	3	109	96.9995	SsWFSL8789	0	1	0	0	0	10.07	175	1060.2	1069	1064.6	3.6	0.9	32.2	0.842	37	99.45	15	1	0.263846	3.34955	8.20496	103.769	92.6981	0.275107	8.89353	96.9995
SsWFSL8789	2018-04-24	201805	P1_7	1	30.6	2.67	58.03	82	1776	95.6013	SsWFSL8789	0	1	0	0	0	10.07	175	1071.5	1075.8	1073.65	3.3	0.3	22.6	0.015	39	99.45	15	1	0.00156678	0.0198905	0.048723	0.616203	92.6981	0.00255079	0.0554391	95.6013
SsWFSL8789	2018-04-24	201806	P1_7	2	29.92	3.26	65.67	98	1964	95.2706	SsWFSL8789	0	1	0	0	0	10.07	175	1071.5	1075.8	1073.65	3.3	0.3	22.6	0.015	39	99.45	15	1	0.00156678	0.0198905	0.048723	0.616203	92.6981	0.00311445	0.062738	95.2706
SsWFSL8789	2018-04-24	201807	P1_7	3	30.85	3.63	64.63	112	1994	94.6821	SsWFSL8789	0	1	0	0	0	10.07	175	1071.5	1075.8	1073.65	3.3	0.3	22.6	0.015	39	99.45	15	1	0.00156678	0.0198905	0.048723	0.616203	92.6981	0.00346793	0.0617445	94.6821
SsWFSL8789	2018-04-24	201808	P1_7	4	30.88	4.11	59.7	127	1843	93.559	SsWFSL8789	0	1	0	0	0	10.07	175	1071.5	1075.8	1073.65	3.3	0.3	22.6	0.015	39	99.45	15	1	0.00156678	0.0198905	0.048723	0.616203	92.6981	0.0039265	0.0570346	93.559
SsWFSL8789	2018-04-24	201809	P1_7	5	30	4.29	57.52	129	1726	93.0594	SsWFSL8789	0	1	0	0	0	10.07	175	1071.5	1075.8	1073.65	3.3	0.3	22.6	0.015	39	99.45	15	1	0.00156678	0.0198905	0.048723	0.616203	92.6981	0.00409847	0.0549519	93.0594
SsWFSL8789	2018-04-24	201810	P1_7	6	31	3.8	58.29	118	1807	93.8799	SsWFSL8789	0	1	0	0	0	10.07	175	1071.5	1075.8	1073.65	3.3	0.3	22.6	0.015	39	99.45	15	1	0.00156678	0.0198905	0.048723	0.616203	92.6981	0.00363034	0.0556875	93.8799
SsWFSL8789	2018-04-24	201811	P1_7	7	30	3.15	55.86	94	1676	94.6619	SsWFSL8789	0	1	0	0	0	10.07	175	1071.5	1075.8	1073.65	3.3	0.3	22.6	0.015	39	99.45	15	1	0.00156678	0.0198905	0.048723	0.616203	92.6981	0.00300936	0.053366	94.6619
SsWFSL8789	2018-04-24	201812	P1_7	8	30.85	2.09	51.38	65	1585	96.0913	SsWFSL8789	0	1	0	0	0	10.07	175	1071.5	1075.8	1073.65	3.3	0.3	22.6	0.015	39	99.45	15	1	0.00156678	0.0198905	0.048723	0.616203	92.6981	0.00199669	0.049086	96.0913
SsWFSL8789	2018-04-24	201903	P1_7	9	1.98	1.71	55.28	3	109	96.9995	SsWFSL8789	0	1	0	0	0	10.07	175	1071.5	1075.8	1073.65	3.3	0.3	22.6	0.015	39	99.45	15	1	0.00156678	0.0198905	0.048723	0.616203	92.6981	0.00163365	0.0528119	96.9995
SsWFSL8789	2018-04-24	201805	P2_1-P2_7	1	30.6	2.67	58.03	82	1776	95.6013	SsWFSL8789	0	1	0	0	0	10.07	175	1078.9	1095.2	1087.05	4.2	3.2	29.5	0.66	41	99.45	15	1	0.735342	9.33525	22.8673	289.205	92.6981	1.19717	26.0194	95.6013
SsWFSL8789	2018-04-24	201806	P2_1-P2_7	2	29.92	3.26	65.67	98	1964	95.2706	SsWFSL8789	0	1	0	0	0	10.07	175	1078.9	1095.2	1087.05	4.2	3.2	29.5	0.66	41	99.45	15	1	0.735342	9.33525	22.8673	289.205	92.6981	1.46172	29.4451	95.2706
SsWFSL8789	2018-04-24	201807	P2_1-P2_7	3	30.85	3.63	64.63	112	1994	94.6821	SsWFSL8789	0	1	0	0	0	10.07	175	1078.9	1095.2	1087.05	4.2	3.2	29.5	0.66	41	99.45	15	1	0.735342	9.33525	22.8673	289.205	92.6981	1.62762	28.9787	94.6821
SsWFSL8789	2018-04-24	201808	P2_1-P2_7	4	30.88	4.11	59.7	127	1843	93.559	SsWFSL8789	0	1	0	0	0	10.07	175	1078.9	1095.2	1087.05	4.2	3.2	29.5	0.66	41	99.45	15	1	0.735342	9.33525	22.8673	289.205	92.6981	1.84284	26.7682	93.559
SsWFSL8789	2018-04-24	201809	P2_1-P2_7	5	30	4.29	57.52	129	1726	93.0594	SsWFSL8789	0	1	0	0	0	10.07	175	1078.9	1095.2	1087.05	4.2	3.2	29.5	0.66	41	99.45	15	1	0.735342	9.33525	22.8673	289.205	92.6981	1.92355	25.7908	93.0594
SsWFSL8789	2018-04-24	201810	P2_1-P2_7	6	31	3.8	58.29	118	1807	93.8799	SsWFSL8789	0	1	0	0	0	10.07	175	1078.9	1095.2	1087.05	4.2	3.2	29.5	0.66	41	99.45	15	1	0.735342	9.33525	22.8673	289.205	92.6981	1.70384	26.136	93.8799
SsWFSL8789	2018-04-24	201811	P2_1-P2_7	7	30	3.15	55.86	94	1676	94.6619	SsWFSL8789	0	1	0	0	0	10.07	175	1078.9	1095.2	1087.05	4.2	3.2	29.5	0.66	41	99.45	15	1	0.735342	9.33525	22.8673	289.205	92.6981	1.41239	25.0465	94.6619
SsWFSL8789	2018-04-24	201812	P2_1-P2_7	8	30.85	2.09	51.38	65	1585	96.0913	SsWFSL8789	0	1	0	0	0	10.07	175	1078.9	1095.2	1087.05	4.2	3.2	29.5	0.66	41	99.45	15	1	0.735342	9.33525	22.8673	289.205	92.6981	0.937112	23.0377	96.0913
SsWFSL8789	2018-04-24	201903	P2_1-P2_7	9	1.98	1.71	55.28	3	109	96.9995	SsWFSL8789	0	1	0	0	0	10.07	175	1078.9	1095.2	1087.05	4.2	3.2	29.5	0.66	41	99.45	15	1	0.735342	9.33525	22.8673	289.205	92.6981	0.766728	24.7864	96.9995
SsWFSL8789	2018-04-24	201805	P2_8-P2_10	1	30.6	2.67	58.03	82	1776	95.6013	SsWFSL8789	0	1	0	0	0	10.07	175	1098	1108.2	1103.1	3.7	0.8	30.7	0.36	44	99.45	15	1	0.100274	1.27299	3.11827	39.437	92.6981	0.163251	3.54811	95.6013
SsWFSL8789	2018-04-24	201806	P2_8-P2_10	2	29.92	3.26	65.67	98	1964	95.2706	SsWFSL8789	0	1	0	0	0	10.07	175	1098	1108.2	1103.1	3.7	0.8	30.7	0.36	44	99.45	15	1	0.100274	1.27299	3.11827	39.437	92.6981	0.199325	4.01523	95.2706
SsWFSL8789	2018-04-24	201807	P2_8-P2_10	3	30.85	3.63	64.63	112	1994	94.6821	SsWFSL8789	0	1	0	0	0	10.07	175	1098	1108.2	1103.1	3.7	0.8	30.7	0.36	44	99.45	15	1	0.100274	1.27299	3.11827	39.437	92.6981	0.221948	3.95165	94.6821
SsWFSL8789	2018-04-24	201808	P2_8-P2_10	4	30.88	4.11	59.7	127	1843	93.559	SsWFSL8789	0	1	0	0	0	10.07	175	1098	1108.2	1103.1	3.7	0.8	30.7	0.36	44	99.45	15	1	0.100274	1.27299	3.11827	39.437	92.6981	0.251296	3.65021	93.559
SsWFSL8789	2018-04-24	201809	P2_8-P2_10	5	30	4.29	57.52	129	1726	93.0594	SsWFSL8789	0	1	0	0	0	10.07	175	1098	1108.2	1103.1	3.7	0.8	30.7	0.36	44	99.45	15	1	0.100274	1.27299	3.11827	39.437	92.6981	0.262302	3.51692	93.0594
SsWFSL8789	2018-04-24	201810	P2_8-P2_10	6	31	3.8	58.29	118	1807	93.8799	SsWFSL8789	0	1	0	0	0	10.07	175	1098	1108.2	1103.1	3.7	0.8	30.7	0.36	44	99.45	15	1	0.100274	1.27299	3.11827	39.437	92.6981	0.232342	3.564	93.8799
SsWFSL8789	2018-04-24	201811	P2_8-P2_10	7	30	3.15	55.86	94	1676	94.6619	SsWFSL8789	0	1	0	0	0	10.07	175	1098	1108.2	1103.1	3.7	0.8	30.7	0.36	44	99.45	15	1	0.100274	1.27299	3.11827	39.437	92.6981	0.192599	3.41543	94.6619
SsWFSL8789	2018-04-24	201812	P2_8-P2_10	8	30.85	2.09	51.38	65	1585	96.0913	SsWFSL8789	0	1	0	0	0	10.07	175	1098	1108.2	1103.1	3.7	0.8	30.7	0.36	44	99.45	15	1	0.100274	1.27299	3.11827	39.437	92.6981	0.127788	3.14151	96.0913
SsWFSL8789	2018-04-24	201903	P2_8-P2_10	9	1.98	1.71	55.28	3	109	96.9995	SsWFSL8789	0	1	0	0	0	10.07	175	1098	1108.2	1103.1	3.7	0.8	30.7	0.36	44	99.45	15	1	0.100274	1.27299	3.11827	39.437	92.6981	0.104554	3.37996	96.9995
FgUsOF5377	2018-05-15	201806	S1_1	1	29.92	3.86	57.93	116	1733	93.753	FgUsOF5377	0	1	0	0	0	8.97	175	915	918.6	916.8	2.8	0.3	25.2	0.157	28	91.76	14	1	0.0128091	0.188795	0.389843	5.66665	93.6464	0.0537426	0.806557	93.753
FgUsOF5377	2018-05-12	201807	S1_1	2	30.76	4.78	67.15	147	2066	93.3547	FgUsOF5377	0	1	0	0	0	8.97	175	915	918.6	916.8	2.8	0.3	25.2	0.157	28	91.76	14	1	0.0128091	0.188795	0.389843	5.66665	93.6464	0.0665518	0.934927	93.3547
FgUsOF5377	2018-05-12	201808	S1_1	3	30.61	4.27	51.6	131	1580	92.3573	FgUsOF5377	0	1	0	0	0	8.97	175	915	918.6	916.8	2.8	0.3	25.2	0.157	28	91.76	14	1	0.0128091	0.188795	0.389843	5.66665	93.6464	0.0594511	0.718425	92.3573
FgUsOF5377	2018-05-12	201809	S1_1	4	29.19	4.11	46.51	120	1358	91.8807	FgUsOF5377	0	1	0	0	0	8.97	175	915	918.6	916.8	2.8	0.3	25.2	0.157	28	91.76	14	1	0.0128091	0.188795	0.389843	5.66665	93.6464	0.0572234	0.647557	91.8807
FgUsOF5377	2018-05-15	201810	S1_1	5	31	4.73	51.15	147	1586	91.5354	FgUsOF5377	0	1	0	0	0	8.97	175	915	918.6	916.8	2.8	0.3	25.2	0.157	28	91.76	14	1	0.0128091	0.188795	0.389843	5.66665	93.6464	0.0658556	0.71216	91.5354
FgUsOF5377	2018-05-15	201811	S1_1	6	30	5.37	52.92	161	1588	90.7874	FgUsOF5377	0	1	0	0	0	8.97	175	915	918.6	916.8	2.8	0.3	25.2	0.157	28	91.76	14	1	0.0128091	0.188795	0.389843	5.66665	93.6464	0.0747663	0.736803	90.7874
FgUsOF5377	2018-05-12	202012	S1_2	1	30.96	2.78	80.29	86	2486	96.6534	FgUsOF5377	0	1	0	0	0	8.97	175	921.3	922.8	922.05	1	0.6	25.8	0.074	31	90.76	15	1	0.0120748	0.177973	0.367495	5.34181	93.6464	0.036487	1.05379	96.6534
FgUsOF5377	2018-05-15	202101	S1_2	2	30.94	2.93	81.93	91	2535	96.5473	FgUsOF5377	0	1	0	0	0	8.97	175	921.3	922.8	922.05	1	0.6	25.8	0.074	31	90.76	15	1	0.0120748	0.177973	0.367495	5.34181	93.6464	0.0384558	1.07532	96.5473
FgUsOF5377	2018-05-15	202102	S1_2	3	28	2.85	82.35	80	2306	96.6549	FgUsOF5377	0	1	0	0	0	8.97	175	921.3	922.8	922.05	1	0.6	25.8	0.074	31	90.76	15	1	0.0120748	0.177973	0.367495	5.34181	93.6464	0.0374058	1.08083	96.6549
FgUsOF5377	2018-05-15	202103	S1_2	4	31	3.26	91.23	101	2828	96.5499	FgUsOF5377	0	1	0	0	0	8.97	175	921.3	922.8	922.05	1	0.6	25.8	0.074	31	90.76	15	1	0.0120748	0.177973	0.367495	5.34181	93.6464	0.042787	1.19738	96.5499
FgUsOF5377	2018-05-12	202104	S1_2	5	30	3.46	101.56	104	3047	96.7054	FgUsOF5377	0	1	0	0	0	8.97	175	921.3	922.8	922.05	1	0.6	25.8	0.074	31	90.76	15	1	0.0120748	0.177973	0.367495	5.34181	93.6464	0.0454119	1.33296	96.7054
FgUsOF5377	2018-05-15	202105	S1_2	6	30.98	3.71	102.57	115	3178	96.5092	FgUsOF5377	0	1	0	0	0	8.97	175	921.3	922.8	922.05	1	0.6	25.8	0.074	31	90.76	15	1	0.0120748	0.177973	0.367495	5.34181	93.6464	0.0486931	1.34621	96.5092
FgUsOF5377	2018-05-15	202106	S1_2	7	29.96	3.08	101.75	92	3048	97.0619	FgUsOF5377	0	1	0	0	0	8.97	175	921.3	922.8	922.05	1	0.6	25.8	0.074	31	90.76	15	1	0.0120748	0.177973	0.367495	5.34181	93.6464	0.0404245	1.33545	97.0619
DQbanLh3O0	2018-05-05	201806	G2_7-G2_11	1	29.9	3.19	98.66	96	2950	96.8679	DQbanLh3O0	0	1	0	0	0	9.87	212	1089	1096.6	1092.8	4.8	2.4	27.6	0.19	34	73.64	14	1	0.451667	12.2281	12.1179	327.183	96.4379	1.1714	36.2288	96.8679
DQbanLh3O0	2018-05-05	201807	G2_7-G2_11	2	30.36	4.21	104.98	128	3187	96.1443	DQbanLh3O0	0	1	0	0	0	9.87	212	1089	1096.6	1092.8	4.8	2.4	27.6	0.19	34	73.64	14	1	0.451667	12.2281	12.1179	327.183	96.4379	1.54595	38.5496	96.1443
DQbanLh3O0	2018-05-05	201808	G2_7-G2_11	3	30.96	6.12	107.57	189	3330	94.6169	DQbanLh3O0	0	1	0	0	0	9.87	212	1089	1096.6	1092.8	4.8	2.4	27.6	0.19	34	73.64	14	1	0.451667	12.2281	12.1179	327.183	96.4379	2.24732	39.5007	94.6169
DQbanLh3O0	2018-05-05	201809	G2_7-G2_11	4	28.59	4.19	109.74	120	3138	96.3223	DQbanLh3O0	0	1	0	0	0	9.87	212	1089	1096.6	1092.8	4.8	2.4	27.6	0.19	34	73.64	14	1	0.451667	12.2281	12.1179	327.183	96.4379	1.53861	40.2975	96.3223
DQbanLh3O0	2018-05-05	201811	G2_7-G2_11	5	19.38	6.86	138.56	133	2685	95.2826	DQbanLh3O0	0	1	0	0	0	9.87	212	1089	1096.6	1092.8	4.8	2.4	27.6	0.19	34	73.64	14	1	0.451667	12.2281	12.1179	327.183	96.4379	2.51905	50.8805	95.2826
DQbanLh3O0	2018-05-05	201812	G2_7-G2_11	6	30.52	7.6	140.09	232	4276	94.8541	DQbanLh3O0	0	1	0	0	0	9.87	212	1089	1096.6	1092.8	4.8	2.4	27.6	0.19	34	73.64	14	1	0.451667	12.2281	12.1179	327.183	96.4379	2.79079	51.4423	94.8541
DQbanLh3O0	2018-05-05	201901	G2_7-G2_11	7	30.77	7.84	129.59	241	3988	94.2953	DQbanLh3O0	0	1	0	0	0	9.87	212	1089	1096.6	1092.8	4.8	2.4	27.6	0.19	34	73.64	14	1	0.451667	12.2281	12.1179	327.183	96.4379	2.87892	47.5866	94.2953
DQbanLh3O0	2018-05-05	201902	G2_7-G2_11	8	28	6.41	127.13	179	3560	95.1999	DQbanLh3O0	0	1	0	0	0	9.87	212	1089	1096.6	1092.8	4.8	2.4	27.6	0.19	34	73.64	14	1	0.451667	12.2281	12.1179	327.183	96.4379	2.35381	46.6833	95.1999
DQbanLh3O0	2018-05-05	201903	G2_7-G2_11	9	27.98	3.41	130.38	95	3648	97.4512	DQbanLh3O0	0	1	0	0	0	9.87	212	1089	1096.6	1092.8	4.8	2.4	27.6	0.19	34	73.64	14	1	0.451667	12.2281	12.1179	327.183	96.4379	1.25218	47.8767	97.4512
DQbanLh3O0	2018-05-05	201904	G2_7-G2_11	10	25.72	3.03	133.66	78	3437	97.7833	DQbanLh3O0	0	1	0	0	0	9.87	212	1089	1096.6	1092.8	4.8	2.4	27.6	0.19	34	73.64	14	1	0.451667	12.2281	12.1179	327.183	96.4379	1.11264	49.0811	97.7833
DQbanLh3O0	2018-05-05	201905	G2_7-G2_11	11	30.98	3.67	136.48	114	4228	97.3814	DQbanLh3O0	0	1	0	0	0	9.87	212	1089	1096.6	1092.8	4.8	2.4	27.6	0.19	34	73.64	14	1	0.451667	12.2281	12.1179	327.183	96.4379	1.34766	50.1167	97.3814
DQbanLh3O0	2018-05-05	201806	G2_15-G2_16	1	29.9	3.19	98.66	96	2950	96.8679	DQbanLh3O0	0	1	0	0	0	9.87	212	1105	1110.4	1107.7	2.8	1.9	28.2	0.28	26	85.68	14	1	0.526945	14.2661	14.1375	381.714	96.4379	1.36663	42.267	96.8679
DQbanLh3O0	2018-05-05	201807	G2_15-G2_16	2	30.36	4.21	104.98	128	3187	96.1443	DQbanLh3O0	0	1	0	0	0	9.87	212	1105	1110.4	1107.7	2.8	1.9	28.2	0.28	26	85.68	14	1	0.526945	14.2661	14.1375	381.714	96.4379	1.80361	44.9745	96.1443
DQbanLh3O0	2018-05-05	201808	G2_15-G2_16	3	30.96	6.12	107.57	189	3330	94.6169	DQbanLh3O0	0	1	0	0	0	9.87	212	1105	1110.4	1107.7	2.8	1.9	28.2	0.28	26	85.68	14	1	0.526945	14.2661	14.1375	381.714	96.4379	2.62187	46.0841	94.6169
DQbanLh3O0	2018-05-05	201809	G2_15-G2_16	4	28.59	4.19	109.74	120	3138	96.3223	DQbanLh3O0	0	1	0	0	0	9.87	212	1105	1110.4	1107.7	2.8	1.9	28.2	0.28	26	85.68	14	1	0.526945	14.2661	14.1375	381.714	96.4379	1.79504	47.0138	96.3223
DQbanLh3O0	2018-05-05	201811	G2_15-G2_16	5	19.38	6.86	138.56	133	2685	95.2826	DQbanLh3O0	0	1	0	0	0	9.87	212	1105	1110.4	1107.7	2.8	1.9	28.2	0.28	26	85.68	14	1	0.526945	14.2661	14.1375	381.714	96.4379	2.9389	59.3605	95.2826
DQbanLh3O0	2018-05-05	201812	G2_15-G2_16	6	30.52	7.6	140.09	232	4276	94.8541	DQbanLh3O0	0	1	0	0	0	9.87	212	1105	1110.4	1107.7	2.8	1.9	28.2	0.28	26	85.68	14	1	0.526945	14.2661	14.1375	381.714	96.4379	3.25592	60.016	94.8541
DQbanLh3O0	2018-05-05	201901	G2_15-G2_16	7	30.77	7.84	129.59	241	3988	94.2953	DQbanLh3O0	0	1	0	0	0	9.87	212	1105	1110.4	1107.7	2.8	1.9	28.2	0.28	26	85.68	14	1	0.526945	14.2661	14.1375	381.714	96.4379	3.35874	55.5177	94.2953
DQbanLh3O0	2018-05-05	201902	G2_15-G2_16	8	28	6.41	127.13	179	3560	95.1999	DQbanLh3O0	0	1	0	0	0	9.87	212	1105	1110.4	1107.7	2.8	1.9	28.2	0.28	26	85.68	14	1	0.526945	14.2661	14.1375	381.714	96.4379	2.74611	54.4638	95.1999
DQbanLh3O0	2018-05-05	201903	G2_15-G2_16	9	27.98	3.41	130.38	95	3648	97.4512	DQbanLh3O0	0	1	0	0	0	9.87	212	1105	1110.4	1107.7	2.8	1.9	28.2	0.28	26	85.68	14	1	0.526945	14.2661	14.1375	381.714	96.4379	1.46088	55.8561	97.4512
DQbanLh3O0	2018-05-05	201904	G2_15-G2_16	10	25.72	3.03	133.66	78	3437	97.7833	DQbanLh3O0	0	1	0	0	0	9.87	212	1105	1110.4	1107.7	2.8	1.9	28.2	0.28	26	85.68	14	1	0.526945	14.2661	14.1375	381.714	96.4379	1.29808	57.2613	97.7833
DQbanLh3O0	2018-05-05	201905	G2_15-G2_16	11	30.98	3.67	136.48	114	4228	97.3814	DQbanLh3O0	0	1	0	0	0	9.87	212	1105	1110.4	1107.7	2.8	1.9	28.2	0.28	26	85.68	14	1	0.526945	14.2661	14.1375	381.714	96.4379	1.57227	58.4694	97.3814
golYtK1464	2018-05-12	201806	P2_4-P2_8	1	29.96	0.95	23.14	29	693	96.0565	golYtK1464	0	1	0	0	0	10.71	175	1142.9	1153.9	1148.4	3.2	0.5	28.7	0.17	45	95	15	1	0.239388	5.79388	3.46939	80.8367	96.0322	0.329592	8.02816	96.0565
golYtK1464	2018-05-12	201806	P2_9-P2_10	1	29.96	0.95	23.14	29	693	96.0565	golYtK1464	0	1	0	0	0	10.71	175	1155.7	1164.4	1160.05	7	1	28.3	0.16	41	95	15	1	0.450612	10.9061	6.53061	152.163	96.0322	0.620408	15.1118	96.0565
DQFGRfvL3C	2018-05-29	201810	G1_20-G2_2	1	31	1.89	16.27	59	505	89.5925	DQFGRfvL3C	0	1	0	0	0	9.34	150	1186.7	1193	1189.85	3.9	1.6	25.9	0.096	25	86.91	13	1	1.87	6.01	58	186	76.269	1.89	16.27	89.5925
DQFGRfvL3C	2018-05-29	201811	G1_20-G2_2	2	29.92	2.03	20.08	61	601	90.8186	DQFGRfvL3C	0	1	0	0	0	9.34	150	1186.7	1193	1189.85	3.9	1.6	25.9	0.096	25	86.91	13	1	1.87	6.01	58	186	76.269	2.03	20.08	90.8186
DQFGRfvL3C	2018-05-29	201812	G1_20-G2_2	3	31	2.85	20.64	88	640	87.8672	DQFGRfvL3C	0	1	0	0	0	9.34	150	1186.7	1193	1189.85	3.9	1.6	25.9	0.096	25	86.91	13	1	1.87	6.01	58	186	76.269	2.85	20.64	87.8672
DQFGRfvL3C	2018-05-29	201901	G1_20-G2_2	4	31	2.92	22.52	91	698	88.522	DQFGRfvL3C	0	1	0	0	0	9.34	150	1186.7	1193	1189.85	3.9	1.6	25.9	0.096	25	86.91	13	1	1.87	6.01	58	186	76.269	2.92	22.52	88.522
DQFGRfvL3C	2018-05-29	201902	G1_20-G2_2	5	27.96	3.21	19.34	90	541	85.765	DQFGRfvL3C	0	1	0	0	0	9.34	150	1186.7	1193	1189.85	3.9	1.6	25.9	0.096	25	86.91	13	1	1.87	6.01	58	186	76.269	3.21	19.34	85.765
DQFGRfvL3C	2018-05-29	201903	G1_20-G2_2	6	30.83	2.78	18.01	86	555	86.6282	DQFGRfvL3C	0	1	0	0	0	9.34	150	1186.7	1193	1189.85	3.9	1.6	25.9	0.096	25	86.91	13	1	1.87	6.01	58	186	76.269	2.78	18.01	86.6282
DQFGRfvL3C	2018-05-29	201904	G1_20-G2_2	7	30	2.43	17.25	73	517	87.6524	DQFGRfvL3C	0	1	0	0	0	9.34	150	1186.7	1193	1189.85	3.9	1.6	25.9	0.096	25	86.91	13	1	1.87	6.01	58	186	76.269	2.43	17.25	87.6524
DQQsGbGEIu	2018-06-11	201807	G2_15-G2_16	1	29.69	5.55	87.55	165	2599	94.0387	DQQsGbGEIu	0	1	0	0	0	9.87	212	1092.1	1096.5	1094.3	2.9	1.7	28.6	0.184	29	91.44	15	1	1.17829	7.06972	36.5907	219.208	85.7143	1.8631	29.39	94.0387
DQQsGbGEIu	2018-06-11	201808	G2_15-G2_16	2	29.81	6.7	83.49	200	2489	92.5712	DQQsGbGEIu	0	1	0	0	0	9.87	212	1092.1	1096.5	1094.3	2.9	1.7	28.6	0.184	29	91.44	15	1	1.17829	7.06972	36.5907	219.208	85.7143	2.24915	28.0271	92.5712
DQQsGbGEIu	2018-06-11	201809	G2_15-G2_16	3	29.9	6.79	74.74	203	2234	91.6718	DQQsGbGEIu	0	1	0	0	0	9.87	212	1092.1	1096.5	1094.3	2.9	1.7	28.6	0.184	29	91.44	15	1	1.17829	7.06972	36.5907	219.208	85.7143	2.27936	25.0898	91.6718
DQQsGbGEIu	2018-06-11	201810	G2_15-G2_16	4	30.91	5.55	58.45	172	1807	91.3281	DQQsGbGEIu	0	1	0	0	0	9.87	212	1092.1	1096.5	1094.3	2.9	1.7	28.6	0.184	29	91.44	15	1	1.17829	7.06972	36.5907	219.208	85.7143	1.8631	19.6213	91.3281
DQQsGbGEIu	2018-06-11	201901	G2_15-G2_16	5	30.77	6.12	62.71	188	1930	91.1085	DQQsGbGEIu	0	1	0	0	0	9.87	212	1092.1	1096.5	1094.3	2.9	1.7	28.6	0.184	29	91.44	15	1	1.17829	7.06972	36.5907	219.208	85.7143	2.05445	21.0514	91.1085
DQQsGbGEIu	2018-06-11	201902	G2_15-G2_16	6	27.93	6.16	56.62	172	1581	90.188	DQQsGbGEIu	0	1	0	0	0	9.87	212	1092.1	1096.5	1094.3	2.9	1.7	28.6	0.184	29	91.44	15	1	1.17829	7.06972	36.5907	219.208	85.7143	2.06788	19.007	90.188
DQQsGbGEIu	2018-06-11	201903	G2_15-G2_16	7	30.98	5.76	53.33	178	1652	90.2522	DQQsGbGEIu	0	1	0	0	0	9.87	212	1092.1	1096.5	1094.3	2.9	1.7	28.6	0.184	29	91.44	15	1	1.17829	7.06972	36.5907	219.208	85.7143	1.9336	17.9026	90.2522
DQQsGbGEIu	2018-06-11	201904	G2_15-G2_16	8	29.69	5.73	57.96	170	1721	91.0033	DQQsGbGEIu	0	1	0	0	0	9.87	212	1092.1	1096.5	1094.3	2.9	1.7	28.6	0.184	29	91.44	15	1	1.17829	7.06972	36.5907	219.208	85.7143	1.92353	19.4568	91.0033
DQQsGbGEIu	2018-06-11	201905	G2_15-G2_16	9	30.98	5.33	55.4	165	1716	91.2234	DQQsGbGEIu	0	1	0	0	0	9.87	212	1092.1	1096.5	1094.3	2.9	1.7	28.6	0.184	29	91.44	15	1	1.17829	7.06972	36.5907	219.208	85.7143	1.78925	18.5975	91.2234
DQQsGbGEIu	2018-06-11	201906	G2_15-G2_16	10	29.6	4.64	54.56	137	1615	92.1622	DQQsGbGEIu	0	1	0	0	0	9.87	212	1092.1	1096.5	1094.3	2.9	1.7	28.6	0.184	29	91.44	15	1	1.17829	7.06972	36.5907	219.208	85.7143	1.55762	18.3155	92.1622
sChQEJ1042	2018-06-09	201807	S1_2-S1_3	1	30.81	2.11	37.39	65	1152	94.6582	sChQEJ1042	0	1	0	0	0	9.81	175	941.5	949.2	945.35	6.5	3.9	29.9	0.23	24	85.2	14	1	0.472679	5.45763	14.544	167.619	92.0294	0.767195	13.595	94.6582
sChQEJ1042	2018-06-09	201808	S1_2-S1_3	2	30.85	2.45	37.49	76	1157	93.8658	sChQEJ1042	0	1	0	0	0	9.81	175	941.5	949.2	945.35	6.5	3.9	29.9	0.23	24	85.2	14	1	0.472679	5.45763	14.544	167.619	92.0294	0.890819	13.6313	93.8658
sChQEJ1042	2018-06-09	201809	S1_2-S1_3	3	29.96	2.88	41.65	86	1248	93.5325	sChQEJ1042	0	1	0	0	0	9.81	175	941.5	949.2	945.35	6.5	3.9	29.9	0.23	24	85.2	14	1	0.472679	5.45763	14.544	167.619	92.0294	1.04717	15.1439	93.5325
sChQEJ1042	2018-06-09	201810	S1_2-S1_3	4	30.88	2.94	45.76	91	1413	93.963	sChQEJ1042	0	1	0	0	0	9.81	175	941.5	949.2	945.35	6.5	3.9	29.9	0.23	24	85.2	14	1	0.472679	5.45763	14.544	167.619	92.0294	1.06898	16.6383	93.963
sChQEJ1042	2018-06-09	201811	S1_2-S1_3	5	30	2.52	48.35	76	1451	95.0462	sChQEJ1042	0	1	0	0	0	9.81	175	941.5	949.2	945.35	6.5	3.9	29.9	0.23	24	85.2	14	1	0.472679	5.45763	14.544	167.619	92.0294	0.916271	17.58	95.0462
sChQEJ1042	2018-06-09	201812	S1_2-S1_3	6	30.88	2.32	46.42	72	1433	95.24	sChQEJ1042	0	1	0	0	0	9.81	175	941.5	949.2	945.35	6.5	3.9	29.9	0.23	24	85.2	14	1	0.472679	5.45763	14.544	167.619	92.0294	0.843551	16.8783	95.24
sChQEJ1042	2018-06-09	201901	S1_2-S1_3	7	31	3.55	45.17	110	1400	92.7135	sChQEJ1042	0	1	0	0	0	9.81	175	941.5	949.2	945.35	6.5	3.9	29.9	0.23	24	85.2	14	1	0.472679	5.45763	14.544	167.619	92.0294	1.29078	16.4238	92.7135
sChQEJ1042	2018-06-09	201902	S1_2-S1_3	8	23.67	2.76	36.85	66	890	93.0321	sChQEJ1042	0	1	0	0	0	9.81	175	941.5	949.2	945.35	6.5	3.9	29.9	0.23	24	85.2	14	1	0.472679	5.45763	14.544	167.619	92.0294	1.00353	13.3986	93.0321
sChQEJ1042	2018-06-09	201903	S1_2-S1_3	9	31	2.36	48.78	73	1512	95.3852	sChQEJ1042	0	1	0	0	0	9.81	175	941.5	949.2	945.35	6.5	3.9	29.9	0.23	24	85.2	14	1	0.472679	5.45763	14.544	167.619	92.0294	0.858095	17.7364	95.3852
sChQEJ1042	2018-06-09	201904	S1_2-S1_3	10	30	2.43	46.75	73	1402	95.059	sChQEJ1042	0	1	0	0	0	9.81	175	941.5	949.2	945.35	6.5	3.9	29.9	0.23	24	85.2	14	1	0.472679	5.45763	14.544	167.619	92.0294	0.883547	16.9983	95.059
sChQEJ1042	2018-06-09	201905	S1_2-S1_3	11	30.92	1.83	37.66	57	1164	95.3659	sChQEJ1042	0	1	0	0	0	9.81	175	941.5	949.2	945.35	6.5	3.9	29.9	0.23	24	85.2	14	1	0.472679	5.45763	14.544	167.619	92.0294	0.665387	13.6932	95.3659
sChQEJ1042	2018-06-09	201906	S1_2-S1_3	12	29.71	1.61	31.67	48	941	95.1623	sChQEJ1042	0	1	0	0	0	9.81	175	941.5	949.2	945.35	6.5	3.9	29.9	0.23	24	85.2	14	1	0.472679	5.45763	14.544	167.619	92.0294	0.585395	11.5152	95.1623
lhnbbt5258	2018-06-23	201807	S2_4-S2_5+6	1	26.99	2.6	36.99	70	998	93.4327	lhnbbt5258	0	1	0	0	0	8.29	220	941.5	944.2	942.85	1.8	0.8	30	0.12	46	90.88	14	1	0.116044	1.27874	3.61695	39.5604	91.6802	0.195918	2.78732	93.4327
lhnbbt5258	2018-06-23	201808	S2_4-S2_5+6	2	30.85	2.11	37.74	65	1164	94.7051	lhnbbt5258	0	1	0	0	0	8.29	220	941.5	944.2	942.85	1.8	0.8	30	0.12	46	90.88	14	1	0.116044	1.27874	3.61695	39.5604	91.6802	0.158995	2.84383	94.7051
lhnbbt5258	2018-06-23	201809	S2_4-S2_5+6	3	29.92	1.88	36.4	56	1089	95.0888	lhnbbt5258	0	1	0	0	0	8.29	220	941.5	944.2	942.85	1.8	0.8	30	0.12	46	90.88	14	1	0.116044	1.27874	3.61695	39.5604	91.6802	0.141664	2.74286	95.0888
lhnbbt5258	2018-06-23	201810	S2_4-S2_5+6	4	30.96	2.75	32.5	85	1006	92.1986	lhnbbt5258	0	1	0	0	0	8.29	220	941.5	944.2	942.85	1.8	0.8	30	0.12	46	90.88	14	1	0.116044	1.27874	3.61695	39.5604	91.6802	0.207221	2.44898	92.1986
lhnbbt5258	2018-06-23	201811	S2_4-S2_5+6	5	29.77	3.72	27.09	111	807	87.926	lhnbbt5258	0	1	0	0	0	8.29	220	941.5	944.2	942.85	1.8	0.8	30	0.12	46	90.88	14	1	0.116044	1.27874	3.61695	39.5604	91.6802	0.280314	2.04132	87.926
lhnbbt5258	2018-06-23	201812	S2_4-S2_5+6	6	30.63	3.09	26.42	95	809	89.529	lhnbbt5258	0	1	0	0	0	8.29	220	941.5	944.2	942.85	1.8	0.8	30	0.12	46	90.88	14	1	0.116044	1.27874	3.61695	39.5604	91.6802	0.232841	1.99083	89.529
lhnbbt5258	2018-06-23	201901	S2_4-S2_5+6	7	31	2.22	24.87	69	771	91.8051	lhnbbt5258	0	1	0	0	0	8.29	220	941.5	944.2	942.85	1.8	0.8	30	0.12	46	90.88	14	1	0.116044	1.27874	3.61695	39.5604	91.6802	0.167284	1.87403	91.8051
lhnbbt5258	2018-06-23	201902	S2_4-S2_5+6	8	24.25	1.59	19.06	39	462	92.3002	lhnbbt5258	0	1	0	0	0	8.29	220	941.5	944.2	942.85	1.8	0.8	30	0.12	46	90.88	14	1	0.116044	1.27874	3.61695	39.5604	91.6802	0.119812	1.43623	92.3002
lhnbbt5258	2018-06-23	201807	P2_7-8	1	26.99	2.6	36.99	70	998	93.4327	lhnbbt5258	0	1	0	0	0	8.29	220	1079.8	1081.5	1080.65	3.4	2.4	29.3	0.22	46	99.18	15	1	0.638242	7.03309	19.8932	217.582	91.6802	1.07755	15.3302	93.4327
lhnbbt5258	2018-06-23	201808	P2_7-8	2	30.85	2.11	37.74	65	1164	94.7051	lhnbbt5258	0	1	0	0	0	8.29	220	1079.8	1081.5	1080.65	3.4	2.4	29.3	0.22	46	99.18	15	1	0.638242	7.03309	19.8932	217.582	91.6802	0.874474	15.6411	94.7051
lhnbbt5258	2018-06-23	201809	P2_7-8	3	29.92	1.88	36.4	56	1089	95.0888	lhnbbt5258	0	1	0	0	0	8.29	220	1079.8	1081.5	1080.65	3.4	2.4	29.3	0.22	46	99.18	15	1	0.638242	7.03309	19.8932	217.582	91.6802	0.779152	15.0857	95.0888
lhnbbt5258	2018-06-23	201810	P2_7-8	4	30.96	2.75	32.5	85	1006	92.1986	lhnbbt5258	0	1	0	0	0	8.29	220	1079.8	1081.5	1080.65	3.4	2.4	29.3	0.22	46	99.18	15	1	0.638242	7.03309	19.8932	217.582	91.6802	1.13972	13.4694	92.1986
lhnbbt5258	2018-06-23	201811	P2_7-8	5	29.77	3.72	27.09	111	807	87.926	lhnbbt5258	0	1	0	0	0	8.29	220	1079.8	1081.5	1080.65	3.4	2.4	29.3	0.22	46	99.18	15	1	0.638242	7.03309	19.8932	217.582	91.6802	1.54173	11.2273	87.926
lhnbbt5258	2018-06-23	201812	P2_7-8	6	30.63	3.09	26.42	95	809	89.529	lhnbbt5258	0	1	0	0	0	8.29	220	1079.8	1081.5	1080.65	3.4	2.4	29.3	0.22	46	99.18	15	1	0.638242	7.03309	19.8932	217.582	91.6802	1.28063	10.9496	89.529
lhnbbt5258	2018-06-23	201901	P2_7-8	7	31	2.22	24.87	69	771	91.8051	lhnbbt5258	0	1	0	0	0	8.29	220	1079.8	1081.5	1080.65	3.4	2.4	29.3	0.22	46	99.18	15	1	0.638242	7.03309	19.8932	217.582	91.6802	0.920063	10.3072	91.8051
lhnbbt5258	2018-06-23	201902	P2_7-8	8	24.25	1.59	19.06	39	462	92.3002	lhnbbt5258	0	1	0	0	0	8.29	220	1079.8	1081.5	1080.65	3.4	2.4	29.3	0.22	46	99.18	15	1	0.638242	7.03309	19.8932	217.582	91.6802	0.658964	7.89928	92.3002
lhnbbt5258	2018-06-23	201807	P2_8-9-P2_10_1	1	26.99	2.6	36.99	70	998	93.4327	lhnbbt5258	0	1	0	0	0	8.29	220	1084	1090.4	1087.2	3.2	1.4	29.3	0.22	30	98.04	15	1	0.372308	4.10264	11.6044	126.923	91.6802	0.628571	8.94264	93.4327
lhnbbt5258	2018-06-23	201808	P2_8-9-P2_10_1	2	30.85	2.11	37.74	65	1164	94.7051	lhnbbt5258	0	1	0	0	0	8.29	220	1084	1090.4	1087.2	3.2	1.4	29.3	0.22	30	98.04	15	1	0.372308	4.10264	11.6044	126.923	91.6802	0.51011	9.12396	94.7051
lhnbbt5258	2018-06-23	201809	P2_8-9-P2_10_1	3	29.92	1.88	36.4	56	1089	95.0888	lhnbbt5258	0	1	0	0	0	8.29	220	1084	1090.4	1087.2	3.2	1.4	29.3	0.22	30	98.04	15	1	0.372308	4.10264	11.6044	126.923	91.6802	0.454505	8.8	95.0888
lhnbbt5258	2018-06-23	201810	P2_8-9-P2_10_1	4	30.96	2.75	32.5	85	1006	92.1986	lhnbbt5258	0	1	0	0	0	8.29	220	1084	1090.4	1087.2	3.2	1.4	29.3	0.22	30	98.04	15	1	0.372308	4.10264	11.6044	126.923	91.6802	0.664835	7.85714	92.1986
lhnbbt5258	2018-06-23	201811	P2_8-9-P2_10_1	5	29.77	3.72	27.09	111	807	87.926	lhnbbt5258	0	1	0	0	0	8.29	220	1084	1090.4	1087.2	3.2	1.4	29.3	0.22	30	98.04	15	1	0.372308	4.10264	11.6044	126.923	91.6802	0.899341	6.54923	87.926
lhnbbt5258	2018-06-23	201812	P2_8-9-P2_10_1	6	30.63	3.09	26.42	95	809	89.529	lhnbbt5258	0	1	0	0	0	8.29	220	1084	1090.4	1087.2	3.2	1.4	29.3	0.22	30	98.04	15	1	0.372308	4.10264	11.6044	126.923	91.6802	0.747033	6.38725	89.529
lhnbbt5258	2018-06-23	201901	P2_8-9-P2_10_1	7	31	2.22	24.87	69	771	91.8051	lhnbbt5258	0	1	0	0	0	8.29	220	1084	1090.4	1087.2	3.2	1.4	29.3	0.22	30	98.04	15	1	0.372308	4.10264	11.6044	126.923	91.6802	0.536703	6.01253	91.8051
lhnbbt5258	2018-06-23	201902	P2_8-9-P2_10_1	8	24.25	1.59	19.06	39	462	92.3002	lhnbbt5258	0	1	0	0	0	8.29	220	1084	1090.4	1087.2	3.2	1.4	29.3	0.22	30	98.04	15	1	0.372308	4.10264	11.6044	126.923	91.6802	0.384396	4.60791	92.3002
lhnbbt5258	2018-06-23	201807	P2_10_2-P2_10_3	1	26.99	2.6	36.99	70	998	93.4327	lhnbbt5258	0	1	0	0	0	8.29	220	1093.5	1096.9	1095.2	4.6	1.9	29.3	0.18	43	103.95	16	1	0.413407	4.55553	12.8854	140.934	91.6802	0.697959	9.92981	93.4327
lhnbbt5258	2018-06-23	201808	P2_10_2-P2_10_3	2	30.85	2.11	37.74	65	1164	94.7051	lhnbbt5258	0	1	0	0	0	8.29	220	1093.5	1096.9	1095.2	4.6	1.9	29.3	0.18	43	103.95	16	1	0.413407	4.55553	12.8854	140.934	91.6802	0.566421	10.1311	94.7051
lhnbbt5258	2018-06-23	201809	P2_10_2-P2_10_3	3	29.92	1.88	36.4	56	1089	95.0888	lhnbbt5258	0	1	0	0	0	8.29	220	1093.5	1096.9	1095.2	4.6	1.9	29.3	0.18	43	103.95	16	1	0.413407	4.55553	12.8854	140.934	91.6802	0.504678	9.77143	95.0888
lhnbbt5258	2018-06-23	201810	P2_10_2-P2_10_3	4	30.96	2.75	32.5	85	1006	92.1986	lhnbbt5258	0	1	0	0	0	8.29	220	1093.5	1096.9	1095.2	4.6	1.9	29.3	0.18	43	103.95	16	1	0.413407	4.55553	12.8854	140.934	91.6802	0.738226	8.72449	92.1986
lhnbbt5258	2018-06-23	201811	P2_10_2-P2_10_3	5	29.77	3.72	27.09	111	807	87.926	lhnbbt5258	0	1	0	0	0	8.29	220	1093.5	1096.9	1095.2	4.6	1.9	29.3	0.18	43	103.95	16	1	0.413407	4.55553	12.8854	140.934	91.6802	0.998619	7.2722	87.926
lhnbbt5258	2018-06-23	201812	P2_10_2-P2_10_3	6	30.63	3.09	26.42	95	809	89.529	lhnbbt5258	0	1	0	0	0	8.29	220	1093.5	1096.9	1095.2	4.6	1.9	29.3	0.18	43	103.95	16	1	0.413407	4.55553	12.8854	140.934	91.6802	0.829498	7.09234	89.529
lhnbbt5258	2018-06-23	201901	P2_10_2-P2_10_3	7	31	2.22	24.87	69	771	91.8051	lhnbbt5258	0	1	0	0	0	8.29	220	1093.5	1096.9	1095.2	4.6	1.9	29.3	0.18	43	103.95	16	1	0.413407	4.55553	12.8854	140.934	91.6802	0.59595	6.67625	91.8051
lhnbbt5258	2018-06-23	201902	P2_10_2-P2_10_3	8	24.25	1.59	19.06	39	462	92.3002	lhnbbt5258	0	1	0	0	0	8.29	220	1093.5	1096.9	1095.2	4.6	1.9	29.3	0.18	43	103.95	16	1	0.413407	4.55553	12.8854	140.934	91.6802	0.426829	5.11658	92.3002
bbZpOC9035	2018-07-30	201808	S1_1-S1_2	1	30.95	3.04	42.27	94	1308	93.2907	bbZpOC9035	0	1	0	0	0	9.54	212	888.5	893.9	891.2	3.3	0.5	30.6	0.487	47	90.9	14	1	0.0289325	0.410131	0.659864	9.44113	93.4104	0.154307	2.14557	93.2907
bbZpOC9035	2018-07-30	201809	S1_1-S1_2	2	29.9	3.06	42.5	91	1271	93.2836	bbZpOC9035	0	1	0	0	0	9.54	212	888.5	893.9	891.2	3.3	0.5	30.6	0.487	47	90.9	14	1	0.0289325	0.410131	0.659864	9.44113	93.4104	0.155322	2.15725	93.2836
bbZpOC9035	2018-07-30	201810	S1_1-S1_2	3	30.56	3.91	42.25	120	1291	91.5295	bbZpOC9035	0	1	0	0	0	9.54	212	888.5	893.9	891.2	3.3	0.5	30.6	0.487	47	90.9	14	1	0.0289325	0.410131	0.659864	9.44113	93.4104	0.198467	2.14456	91.5295
bbZpOC9035	2018-07-30	201811	S1_1-S1_2	4	30	4.45	41.96	134	1259	90.4115	bbZpOC9035	0	1	0	0	0	9.54	212	888.5	893.9	891.2	3.3	0.5	30.6	0.487	47	90.9	14	1	0.0289325	0.410131	0.659864	9.44113	93.4104	0.225877	2.12984	90.4115
bbZpOC9035	2018-07-30	201812	S1_1-S1_2	5	30.96	5.89	40.55	182	1255	87.317	bbZpOC9035	0	1	0	0	0	9.54	212	888.5	893.9	891.2	3.3	0.5	30.6	0.487	47	90.9	14	1	0.0289325	0.410131	0.659864	9.44113	93.4104	0.298969	2.05827	87.317
bbZpOC9035	2018-07-30	201901	S1_1-S1_2	6	29.58	3.82	44.81	113	1326	92.1448	bbZpOC9035	0	1	0	0	0	9.54	212	888.5	893.9	891.2	3.3	0.5	30.6	0.487	47	90.9	14	1	0.0289325	0.410131	0.659864	9.44113	93.4104	0.193899	2.2745	92.1448
bbZpOC9035	2018-07-30	201902	S1_1-S1_2	7	27.52	3.71	45.69	102	1257	92.4899	bbZpOC9035	0	1	0	0	0	9.54	212	888.5	893.9	891.2	3.3	0.5	30.6	0.487	47	90.9	14	1	0.0289325	0.410131	0.659864	9.44113	93.4104	0.188315	2.31917	92.4899
bbZpOC9035	2018-07-30	201903	S1_1-S1_2	8	30.92	4.01	49.14	124	1519	92.4553	bbZpOC9035	0	1	0	0	0	9.54	212	888.5	893.9	891.2	3.3	0.5	30.6	0.487	47	90.9	14	1	0.0289325	0.410131	0.659864	9.44113	93.4104	0.203543	2.49429	92.4553
bbZpOC9035	2018-07-30	201904	S1_1-S1_2	9	30	3.49	53.03	105	1591	93.8252	bbZpOC9035	0	1	0	0	0	9.54	212	888.5	893.9	891.2	3.3	0.5	30.6	0.487	47	90.9	14	1	0.0289325	0.410131	0.659864	9.44113	93.4104	0.177148	2.69174	93.8252
bbZpOC9035	2018-07-30	201905	S1_1-S1_2	10	31	2.89	51.26	90	1589	94.663	bbZpOC9035	0	1	0	0	0	9.54	212	888.5	893.9	891.2	3.3	0.5	30.6	0.487	47	90.9	14	1	0.0289325	0.410131	0.659864	9.44113	93.4104	0.146693	2.60189	94.663
bbZpOC9035	2018-07-30	201906	S1_1-S1_2	11	30	2.35	50.97	70	1529	95.5926	bbZpOC9035	0	1	0	0	0	9.54	212	888.5	893.9	891.2	3.3	0.5	30.6	0.487	47	90.9	14	1	0.0289325	0.410131	0.659864	9.44113	93.4104	0.119283	2.58717	95.5926
bbZpOC9035	2018-07-30	201808	S1_3-S1_4+5	1	30.95	3.04	42.27	94	1308	93.2907	bbZpOC9035	0	1	0	0	0	9.54	212	896.3	900.9	898.6	3	1.8	31.3	0.506	45	96.75	15	1	0.108221	1.53407	2.46819	35.3141	93.4104	0.577177	8.02541	93.2907
bbZpOC9035	2018-07-30	201809	S1_3-S1_4+5	2	29.9	3.06	42.5	91	1271	93.2836	bbZpOC9035	0	1	0	0	0	9.54	212	896.3	900.9	898.6	3	1.8	31.3	0.506	45	96.75	15	1	0.108221	1.53407	2.46819	35.3141	93.4104	0.580974	8.06908	93.2836
bbZpOC9035	2018-07-30	201810	S1_3-S1_4+5	3	30.56	3.91	42.25	120	1291	91.5295	bbZpOC9035	0	1	0	0	0	9.54	212	896.3	900.9	898.6	3	1.8	31.3	0.506	45	96.75	15	1	0.108221	1.53407	2.46819	35.3141	93.4104	0.742356	8.02162	91.5295
bbZpOC9035	2018-07-30	201811	S1_3-S1_4+5	4	30	4.45	41.96	134	1259	90.4115	bbZpOC9035	0	1	0	0	0	9.54	212	896.3	900.9	898.6	3	1.8	31.3	0.506	45	96.75	15	1	0.108221	1.53407	2.46819	35.3141	93.4104	0.84488	7.96656	90.4115
bbZpOC9035	2018-07-30	201812	S1_3-S1_4+5	5	30.96	5.89	40.55	182	1255	87.317	bbZpOC9035	0	1	0	0	0	9.54	212	896.3	900.9	898.6	3	1.8	31.3	0.506	45	96.75	15	1	0.108221	1.53407	2.46819	35.3141	93.4104	1.11828	7.69885	87.317
bbZpOC9035	2018-07-30	201901	S1_3-S1_4+5	6	29.58	3.82	44.81	113	1326	92.1448	bbZpOC9035	0	1	0	0	0	9.54	212	896.3	900.9	898.6	3	1.8	31.3	0.506	45	96.75	15	1	0.108221	1.53407	2.46819	35.3141	93.4104	0.725268	8.50766	92.1448
bbZpOC9035	2018-07-30	201902	S1_3-S1_4+5	7	27.52	3.71	45.69	102	1257	92.4899	bbZpOC9035	0	1	0	0	0	9.54	212	896.3	900.9	898.6	3	1.8	31.3	0.506	45	96.75	15	1	0.108221	1.53407	2.46819	35.3141	93.4104	0.704383	8.67474	92.4899
bbZpOC9035	2018-07-30	201903	S1_3-S1_4+5	8	30.92	4.01	49.14	124	1519	92.4553	bbZpOC9035	0	1	0	0	0	9.54	212	896.3	900.9	898.6	3	1.8	31.3	0.506	45	96.75	15	1	0.108221	1.53407	2.46819	35.3141	93.4104	0.761342	9.32976	92.4553
bbZpOC9035	2018-07-30	201904	S1_3-S1_4+5	9	30	3.49	53.03	105	1591	93.8252	bbZpOC9035	0	1	0	0	0	9.54	212	896.3	900.9	898.6	3	1.8	31.3	0.506	45	96.75	15	1	0.108221	1.53407	2.46819	35.3141	93.4104	0.662614	10.0683	93.8252
bbZpOC9035	2018-07-30	201905	S1_3-S1_4+5	10	31	2.89	51.26	90	1589	94.663	bbZpOC9035	0	1	0	0	0	9.54	212	896.3	900.9	898.6	3	1.8	31.3	0.506	45	96.75	15	1	0.108221	1.53407	2.46819	35.3141	93.4104	0.548698	9.73226	94.663
bbZpOC9035	2018-07-30	201906	S1_3-S1_4+5	11	30	2.35	50.97	70	1529	95.5926	bbZpOC9035	0	1	0	0	0	9.54	212	896.3	900.9	898.6	3	1.8	31.3	0.506	45	96.75	15	1	0.108221	1.53407	2.46819	35.3141	93.4104	0.446173	9.6772	95.5926
bbZpOC9035	2018-07-30	201808	S3_1-S3_10	1	30.95	3.04	42.27	94	1308	93.2907	bbZpOC9035	0	1	0	0	0	9.54	212	963.7	997	980.35	4.8	0.3	31.6	0.546	42	97.2	15	1	0.0194626	0.275891	0.443884	6.35095	93.4104	0.103801	1.44331	93.2907
bbZpOC9035	2018-07-30	201809	S3_1-S3_10	2	29.9	3.06	42.5	91	1271	93.2836	bbZpOC9035	0	1	0	0	0	9.54	212	963.7	997	980.35	4.8	0.3	31.6	0.546	42	97.2	15	1	0.0194626	0.275891	0.443884	6.35095	93.4104	0.104483	1.45116	93.2836
bbZpOC9035	2018-07-30	201810	S3_1-S3_10	3	30.56	3.91	42.25	120	1291	91.5295	bbZpOC9035	0	1	0	0	0	9.54	212	963.7	997	980.35	4.8	0.3	31.6	0.546	42	97.2	15	1	0.0194626	0.275891	0.443884	6.35095	93.4104	0.133507	1.44262	91.5295
bbZpOC9035	2018-07-30	201811	S3_1-S3_10	4	30	4.45	41.96	134	1259	90.4115	bbZpOC9035	0	1	0	0	0	9.54	212	963.7	997	980.35	4.8	0.3	31.6	0.546	42	97.2	15	1	0.0194626	0.275891	0.443884	6.35095	93.4104	0.151945	1.43272	90.4115
bbZpOC9035	2018-07-30	201812	S3_1-S3_10	5	30.96	5.89	40.55	182	1255	87.317	bbZpOC9035	0	1	0	0	0	9.54	212	963.7	997	980.35	4.8	0.3	31.6	0.546	42	97.2	15	1	0.0194626	0.275891	0.443884	6.35095	93.4104	0.201114	1.38458	87.317
bbZpOC9035	2018-07-30	201901	S3_1-S3_10	6	29.58	3.82	44.81	113	1326	92.1448	bbZpOC9035	0	1	0	0	0	9.54	212	963.7	997	980.35	4.8	0.3	31.6	0.546	42	97.2	15	1	0.0194626	0.275891	0.443884	6.35095	93.4104	0.130434	1.53003	92.1448
bbZpOC9035	2018-07-30	201902	S3_1-S3_10	7	27.52	3.71	45.69	102	1257	92.4899	bbZpOC9035	0	1	0	0	0	9.54	212	963.7	997	980.35	4.8	0.3	31.6	0.546	42	97.2	15	1	0.0194626	0.275891	0.443884	6.35095	93.4104	0.126678	1.56008	92.4899
bbZpOC9035	2018-07-30	201903	S3_1-S3_10	8	30.92	4.01	49.14	124	1519	92.4553	bbZpOC9035	0	1	0	0	0	9.54	212	963.7	997	980.35	4.8	0.3	31.6	0.546	42	97.2	15	1	0.0194626	0.275891	0.443884	6.35095	93.4104	0.136921	1.67788	92.4553
bbZpOC9035	2018-07-30	201904	S3_1-S3_10	9	30	3.49	53.03	105	1591	93.8252	bbZpOC9035	0	1	0	0	0	9.54	212	963.7	997	980.35	4.8	0.3	31.6	0.546	42	97.2	15	1	0.0194626	0.275891	0.443884	6.35095	93.4104	0.119166	1.8107	93.8252
bbZpOC9035	2018-07-30	201905	S3_1-S3_10	10	31	2.89	51.26	90	1589	94.663	bbZpOC9035	0	1	0	0	0	9.54	212	963.7	997	980.35	4.8	0.3	31.6	0.546	42	97.2	15	1	0.0194626	0.275891	0.443884	6.35095	93.4104	0.0986788	1.75027	94.663
bbZpOC9035	2018-07-30	201906	S3_1-S3_10	11	30	2.35	50.97	70	1529	95.5926	bbZpOC9035	0	1	0	0	0	9.54	212	963.7	997	980.35	4.8	0.3	31.6	0.546	42	97.2	15	1	0.0194626	0.275891	0.443884	6.35095	93.4104	0.0802406	1.74037	95.5926
FnbbEF8987	2018-07-03	201808	PⅡ10	1	30.9	7.97	51.12	246	1579	86.5121	FnbbEF8987	0	1	0	0	0	9.36	200	941.4	943.6	942.5	2.5	1.2	0	0.16	35	97.2	15	1	2.17649	27.1951	4.39695	54.229	92.5898	5.84061	37.462	86.5121
FnbbEF8987	2018-07-03	201809	PⅡ10	2	29.98	6.6	54.72	198	1641	89.2368	FnbbEF8987	0	1	0	0	0	9.36	200	941.4	943.6	942.5	2.5	1.2	0	0.16	35	97.2	15	1	2.17649	27.1951	4.39695	54.229	92.5898	4.83664	40.1002	89.2368
FnbbEF8987	2018-07-03	201810	PⅡ10	3	30.92	5.67	53.48	175	1654	90.4142	FnbbEF8987	0	1	0	0	0	9.36	200	941.4	943.6	942.5	2.5	1.2	0	0.16	35	97.2	15	1	2.17649	27.1951	4.39695	54.229	92.5898	4.15511	39.1915	90.4142
FnbbEF8987	2018-07-03	201811	PⅡ10	4	29.75	7.07	56.17	210	1671	88.8204	FnbbEF8987	0	1	0	0	0	9.36	200	941.4	943.6	942.5	2.5	1.2	0	0.16	35	97.2	15	1	2.17649	27.1951	4.39695	54.229	92.5898	5.18107	41.1627	88.8204
FnbbEF8987	2018-07-03	201812	PⅡ10	5	30.77	7.8	58.47	240	1799	88.23	FnbbEF8987	0	1	0	0	0	9.36	200	941.4	943.6	942.5	2.5	1.2	0	0.16	35	97.2	15	1	2.17649	27.1951	4.39695	54.229	92.5898	5.71603	42.8482	88.23
FnbbEF8987	2018-07-03	201901	PⅡ10	6	30.71	8.46	58.53	260	1797	87.3712	FnbbEF8987	0	1	0	0	0	9.36	200	941.4	943.6	942.5	2.5	1.2	0	0.16	35	97.2	15	1	2.17649	27.1951	4.39695	54.229	92.5898	6.19969	42.8922	87.3712
FnbbEF8987	2018-07-03	201902	PⅡ10	7	26.04	8.6	60.01	224	1563	87.4654	FnbbEF8987	0	1	0	0	0	9.36	200	941.4	943.6	942.5	2.5	1.2	0	0.16	35	97.2	15	1	2.17649	27.1951	4.39695	54.229	92.5898	6.30229	43.9768	87.4654
FnbbEF8987	2018-07-03	201903	PⅡ10	8	30.42	8.24	59.27	251	1803	87.7944	FnbbEF8987	0	1	0	0	0	9.36	200	941.4	943.6	942.5	2.5	1.2	0	0.16	35	97.2	15	1	2.17649	27.1951	4.39695	54.229	92.5898	6.03847	43.4345	87.7944
FnbbEF8987	2018-07-03	201904	PⅡ10	9	30	7.24	59.32	217	1780	89.1226	FnbbEF8987	0	1	0	0	0	9.36	200	941.4	943.6	942.5	2.5	1.2	0	0.16	35	97.2	15	1	2.17649	27.1951	4.39695	54.229	92.5898	5.30565	43.4711	89.1226
FnbbEF8987	2018-07-03	201905	PⅡ10	10	31	7.32	59.21	202	1839	88.9974	FnbbEF8987	0	1	0	0	0	9.36	200	941.4	943.6	942.5	2.5	1.2	0	0.16	35	97.2	15	1	2.17649	27.1951	4.39695	54.229	92.5898	5.36427	43.3905	88.9974
FnbbEF8987	2018-07-03	201906	PⅡ10	11	29.81	7.15	60.29	220	1896	89.398	FnbbEF8987	0	1	0	0	0	9.36	200	941.4	943.6	942.5	2.5	1.2	0	0.16	35	97.2	15	1	2.17649	27.1951	4.39695	54.229	92.5898	5.23969	44.182	89.398
FnbbEF8987	2018-07-03	201907	PⅡ10	12	30.56	6.45	63.08	197	1928	90.7234	FnbbEF8987	0	1	0	0	0	9.36	200	941.4	943.6	942.5	2.5	1.2	0	0.16	35	97.2	15	1	2.17649	27.1951	4.39695	54.229	92.5898	4.72672	46.2266	90.7234
FnbbEF8987	2018-07-03	201808	GⅠ1-GⅠ2+3\2	1	30.9	7.97	51.12	246	1579	86.5121	FnbbEF8987	0	1	0	0	0	9.36	200	946.3	951	948.65	2.2	0.5	28.8	0.14	38	96.9	15	1	0.793511	9.91489	1.60305	19.771	92.5898	2.12939	13.658	86.5121
FnbbEF8987	2018-07-03	201809	GⅠ1-GⅠ2+3\2	2	29.98	6.6	54.72	198	1641	89.2368	FnbbEF8987	0	1	0	0	0	9.36	200	946.3	951	948.65	2.2	0.5	28.8	0.14	38	96.9	15	1	0.793511	9.91489	1.60305	19.771	92.5898	1.76336	14.6198	89.2368
FnbbEF8987	2018-07-03	201810	GⅠ1-GⅠ2+3\2	3	30.92	5.67	53.48	175	1654	90.4142	FnbbEF8987	0	1	0	0	0	9.36	200	946.3	951	948.65	2.2	0.5	28.8	0.14	38	96.9	15	1	0.793511	9.91489	1.60305	19.771	92.5898	1.51489	14.2885	90.4142
FnbbEF8987	2018-07-03	201811	GⅠ1-GⅠ2+3\2	4	29.75	7.07	56.17	210	1671	88.8204	FnbbEF8987	0	1	0	0	0	9.36	200	946.3	951	948.65	2.2	0.5	28.8	0.14	38	96.9	15	1	0.793511	9.91489	1.60305	19.771	92.5898	1.88893	15.0073	88.8204
FnbbEF8987	2018-07-03	201812	GⅠ1-GⅠ2+3\2	5	30.77	7.8	58.47	240	1799	88.23	FnbbEF8987	0	1	0	0	0	9.36	200	946.3	951	948.65	2.2	0.5	28.8	0.14	38	96.9	15	1	0.793511	9.91489	1.60305	19.771	92.5898	2.08397	15.6218	88.23
FnbbEF8987	2018-07-03	201901	GⅠ1-GⅠ2+3\2	6	30.71	8.46	58.53	260	1797	87.3712	FnbbEF8987	0	1	0	0	0	9.36	200	946.3	951	948.65	2.2	0.5	28.8	0.14	38	96.9	15	1	0.793511	9.91489	1.60305	19.771	92.5898	2.26031	15.6378	87.3712
FnbbEF8987	2018-07-03	201902	GⅠ1-GⅠ2+3\2	7	26.04	8.6	60.01	224	1563	87.4654	FnbbEF8987	0	1	0	0	0	9.36	200	946.3	951	948.65	2.2	0.5	28.8	0.14	38	96.9	15	1	0.793511	9.91489	1.60305	19.771	92.5898	2.29771	16.0332	87.4654
FnbbEF8987	2018-07-03	201903	GⅠ1-GⅠ2+3\2	8	30.42	8.24	59.27	251	1803	87.7944	FnbbEF8987	0	1	0	0	0	9.36	200	946.3	951	948.65	2.2	0.5	28.8	0.14	38	96.9	15	1	0.793511	9.91489	1.60305	19.771	92.5898	2.20153	15.8355	87.7944
FnbbEF8987	2018-07-03	201904	GⅠ1-GⅠ2+3\2	9	30	7.24	59.32	217	1780	89.1226	FnbbEF8987	0	1	0	0	0	9.36	200	946.3	951	948.65	2.2	0.5	28.8	0.14	38	96.9	15	1	0.793511	9.91489	1.60305	19.771	92.5898	1.93435	15.8489	89.1226
FnbbEF8987	2018-07-03	201905	GⅠ1-GⅠ2+3\2	10	31	7.32	59.21	202	1839	88.9974	FnbbEF8987	0	1	0	0	0	9.36	200	946.3	951	948.65	2.2	0.5	28.8	0.14	38	96.9	15	1	0.793511	9.91489	1.60305	19.771	92.5898	1.95573	15.8195	88.9974
FnbbEF8987	2018-07-03	201906	GⅠ1-GⅠ2+3\2	11	29.81	7.15	60.29	220	1896	89.398	FnbbEF8987	0	1	0	0	0	9.36	200	946.3	951	948.65	2.2	0.5	28.8	0.14	38	96.9	15	1	0.793511	9.91489	1.60305	19.771	92.5898	1.91031	16.108	89.398
FnbbEF8987	2018-07-03	201907	GⅠ1-GⅠ2+3\2	12	30.56	6.45	63.08	197	1928	90.7234	FnbbEF8987	0	1	0	0	0	9.36	200	946.3	951	948.65	2.2	0.5	28.8	0.14	38	96.9	15	1	0.793511	9.91489	1.60305	19.771	92.5898	1.72328	16.8534	90.7234
vzPMfj3863	2018-10-04	201811	S1_3	1	29.39	2.05	41.91	60	1232	95.3367	vzPMfj3863	0	1	0	0	0	10.91	220	897.2	900.5	898.85	2.8	1.3	30.1	0.15	45	105.42	16	1	0	0	0	0	0	1.07172	21.9101	95.3367
vzPMfj3863	2018-10-04	201812	S1_3	2	31	1.58	28.64	49	888	94.7717	vzPMfj3863	0	1	0	0	0	10.91	220	897.2	900.5	898.85	2.8	1.3	30.1	0.15	45	105.42	16	1	0	0	0	0	0	0.826005	14.9727	94.7717
vzPMfj3863	2018-10-04	201901	S1_3	3	31	1.37	20.5	43	636	93.7357	vzPMfj3863	0	1	0	0	0	10.91	220	897.2	900.5	898.85	2.8	1.3	30.1	0.15	45	105.42	16	1	0	0	0	0	0	0.71622	10.7172	93.7357
vzPMfj3863	2018-10-04	201902	S1_3	4	28	1.38	18.34	39	514	93.002	vzPMfj3863	0	1	0	0	0	10.91	220	897.2	900.5	898.85	2.8	1.3	30.1	0.15	45	105.42	16	1	0	0	0	0	0	0.721448	9.58794	93.002
vzPMfj3863	2018-10-04	201903	S1_3	5	30.96	1.26	19.78	39	612	94.0114	vzPMfj3863	0	1	0	0	0	10.91	220	897.2	900.5	898.85	2.8	1.3	30.1	0.15	45	105.42	16	1	0	0	0	0	0	0.658713	10.3408	94.0114
vzPMfj3863	2018-10-04	201904	S1_3	6	29.9	1.24	19.12	37	572	93.9096	vzPMfj3863	0	1	0	0	0	10.91	220	897.2	900.5	898.85	2.8	1.3	30.1	0.15	45	105.42	16	1	0	0	0	0	0	0.648257	9.99571	93.9096
vzPMfj3863	2018-10-04	201905	S1_3	7	30.8	1.53	19.17	47	590	92.6087	vzPMfj3863	0	1	0	0	0	10.91	220	897.2	900.5	898.85	2.8	1.3	30.1	0.15	45	105.42	16	1	0	0	0	0	0	0.799866	10.0218	92.6087
vzPMfj3863	2018-10-04	201906	S1_3	8	29.86	1.69	19.31	50	576	91.9524	vzPMfj3863	0	1	0	0	0	10.91	220	897.2	900.5	898.85	2.8	1.3	30.1	0.15	45	105.42	16	1	0	0	0	0	0	0.883512	10.095	91.9524
vzPMfj3863	2018-10-04	201907	S1_3	9	31	1.58	19.61	49	608	92.5437	vzPMfj3863	0	1	0	0	0	10.91	220	897.2	900.5	898.85	2.8	1.3	30.1	0.15	45	105.42	16	1	0	0	0	0	0	0.826005	10.2519	92.5437
vzPMfj3863	2018-10-04	201908	S1_3	10	29.68	1.12	22.02	33	653	95.1599	vzPMfj3863	0	1	0	0	0	10.91	220	897.2	900.5	898.85	2.8	1.3	30.1	0.15	45	105.42	16	1	0	0	0	0	0	0.585523	11.5118	95.1599
vzPMfj3863	2018-10-04	201811	S1_4+5	1	29.39	2.05	41.91	60	1232	95.3367	vzPMfj3863	0	1	0	0	0	10.91	220	902.1	904.1	903.1	1.9	1.4	29.4	0.11	41	105.64	16	1	0	0	0	0	0	0.846381	17.3033	95.3367
vzPMfj3863	2018-10-04	201812	S1_4+5	2	31	1.58	28.64	49	888	94.7717	vzPMfj3863	0	1	0	0	0	10.91	220	902.1	904.1	903.1	1.9	1.4	29.4	0.11	41	105.64	16	1	0	0	0	0	0	0.652332	11.8246	94.7717
vzPMfj3863	2018-10-04	201901	S1_4+5	3	31	1.37	20.5	43	636	93.7357	vzPMfj3863	0	1	0	0	0	10.91	220	902.1	904.1	903.1	1.9	1.4	29.4	0.11	41	105.64	16	1	0	0	0	0	0	0.56563	8.46381	93.7357
vzPMfj3863	2018-10-04	201902	S1_4+5	4	28	1.38	18.34	39	514	93.002	vzPMfj3863	0	1	0	0	0	10.91	220	902.1	904.1	903.1	1.9	1.4	29.4	0.11	41	105.64	16	1	0	0	0	0	0	0.569759	7.57201	93.002
vzPMfj3863	2018-10-04	201903	S1_4+5	5	30.96	1.26	19.78	39	612	94.0114	vzPMfj3863	0	1	0	0	0	10.91	220	902.1	904.1	903.1	1.9	1.4	29.4	0.11	41	105.64	16	1	0	0	0	0	0	0.520214	8.16654	94.0114
vzPMfj3863	2018-10-04	201904	S1_4+5	6	29.9	1.24	19.12	37	572	93.9096	vzPMfj3863	0	1	0	0	0	10.91	220	902.1	904.1	903.1	1.9	1.4	29.4	0.11	41	105.64	16	1	0	0	0	0	0	0.511957	7.89405	93.9096
vzPMfj3863	2018-10-04	201905	S1_4+5	7	30.8	1.53	19.17	47	590	92.6087	vzPMfj3863	0	1	0	0	0	10.91	220	902.1	904.1	903.1	1.9	1.4	29.4	0.11	41	105.64	16	1	0	0	0	0	0	0.631689	7.91469	92.6087
vzPMfj3863	2018-10-04	201906	S1_4+5	8	29.86	1.69	19.31	50	576	91.9524	vzPMfj3863	0	1	0	0	0	10.91	220	902.1	904.1	903.1	1.9	1.4	29.4	0.11	41	105.64	16	1	0	0	0	0	0	0.697748	7.97249	91.9524
vzPMfj3863	2018-10-04	201907	S1_4+5	9	31	1.58	19.61	49	608	92.5437	vzPMfj3863	0	1	0	0	0	10.91	220	902.1	904.1	903.1	1.9	1.4	29.4	0.11	41	105.64	16	1	0	0	0	0	0	0.652332	8.09635	92.5437
vzPMfj3863	2018-10-04	201908	S1_4+5	10	29.68	1.12	22.02	33	653	95.1599	vzPMfj3863	0	1	0	0	0	10.91	220	902.1	904.1	903.1	1.9	1.4	29.4	0.11	41	105.64	16	1	0	0	0	0	0	0.462413	9.09137	95.1599
vzPMfj3863	2018-10-04	201811	S2_11-S2_15+16	1	29.39	2.05	41.91	60	1232	95.3367	vzPMfj3863	0	1	0	0	0	10.91	220	953.2	968.7	960.95	3.5	0.6	27.8	0.04	46	105.75	16	1	0	0	0	0	0	0.131903	2.69662	95.3367
vzPMfj3863	2018-10-04	201812	S2_11-S2_15+16	2	31	1.58	28.64	49	888	94.7717	vzPMfj3863	0	1	0	0	0	10.91	220	953.2	968.7	960.95	3.5	0.6	27.8	0.04	46	105.75	16	1	0	0	0	0	0	0.101662	1.84279	94.7717
vzPMfj3863	2018-10-04	201901	S2_11-S2_15+16	3	31	1.37	20.5	43	636	93.7357	vzPMfj3863	0	1	0	0	0	10.91	220	953.2	968.7	960.95	3.5	0.6	27.8	0.04	46	105.75	16	1	0	0	0	0	0	0.0881501	1.31903	93.7357
vzPMfj3863	2018-10-04	201902	S2_11-S2_15+16	4	28	1.38	18.34	39	514	93.002	vzPMfj3863	0	1	0	0	0	10.91	220	953.2	968.7	960.95	3.5	0.6	27.8	0.04	46	105.75	16	1	0	0	0	0	0	0.0887936	1.18005	93.002
vzPMfj3863	2018-10-04	201903	S2_11-S2_15+16	5	30.96	1.26	19.78	39	612	94.0114	vzPMfj3863	0	1	0	0	0	10.91	220	953.2	968.7	960.95	3.5	0.6	27.8	0.04	46	105.75	16	1	0	0	0	0	0	0.0810724	1.27271	94.0114
vzPMfj3863	2018-10-04	201904	S2_11-S2_15+16	6	29.9	1.24	19.12	37	572	93.9096	vzPMfj3863	0	1	0	0	0	10.91	220	953.2	968.7	960.95	3.5	0.6	27.8	0.04	46	105.75	16	1	0	0	0	0	0	0.0797855	1.23024	93.9096
vzPMfj3863	2018-10-04	201905	S2_11-S2_15+16	7	30.8	1.53	19.17	47	590	92.6087	vzPMfj3863	0	1	0	0	0	10.91	220	953.2	968.7	960.95	3.5	0.6	27.8	0.04	46	105.75	16	1	0	0	0	0	0	0.098445	1.23346	92.6087
vzPMfj3863	2018-10-04	201906	S2_11-S2_15+16	8	29.86	1.69	19.31	50	576	91.9524	vzPMfj3863	0	1	0	0	0	10.91	220	953.2	968.7	960.95	3.5	0.6	27.8	0.04	46	105.75	16	1	0	0	0	0	0	0.10874	1.24247	91.9524
vzPMfj3863	2018-10-04	201907	S2_11-S2_15+16	9	31	1.58	19.61	49	608	92.5437	vzPMfj3863	0	1	0	0	0	10.91	220	953.2	968.7	960.95	3.5	0.6	27.8	0.04	46	105.75	16	1	0	0	0	0	0	0.101662	1.26177	92.5437
vzPMfj3863	2018-10-04	201908	S2_11-S2_15+16	10	29.68	1.12	22.02	33	653	95.1599	vzPMfj3863	0	1	0	0	0	10.91	220	953.2	968.7	960.95	3.5	0.6	27.8	0.04	46	105.75	16	1	0	0	0	0	0	0.0720643	1.41684	95.1599
VLByog5651	2018-10-17	201901	GI1-2+3	1	31	4.07	103.8	126	3218	96.2269	VLByog5651	0	1	0	0	0	9.22	300	1123.4	1128	1125.7	2.8	1.8	0	0.02	0	0	0	1	0.238902	1.7687	6.91991	51.3227	88.1001	0.335286	8.55103	96.2269
VLByog5651	2018-10-17	201902	GI1-2+3	2	27.92	5.79	118.38	162	3305	95.337	VLByog5651	0	1	0	0	0	9.22	300	1123.4	1128	1125.7	2.8	1.8	0	0.02	0	0	0	1	0.238902	1.7687	6.91991	51.3227	88.1001	0.476979	9.75213	95.337
VLByog5651	2018-10-17	201903	GI1-2+3	3	30.5	4.95	90.46	151	2759	94.8119	VLByog5651	0	1	0	0	0	9.22	300	1123.4	1128	1125.7	2.8	1.8	0	0.02	0	0	0	1	0.238902	1.7687	6.91991	51.3227	88.1001	0.40778	7.45208	94.8119
VLByog5651	2018-10-17	201904	GI1-2+3	4	30	6.57	58.47	197	1754	89.8985	VLByog5651	0	1	0	0	0	9.22	300	1123.4	1128	1125.7	2.8	1.8	0	0.02	0	0	0	1	0.238902	1.7687	6.91991	51.3227	88.1001	0.541236	4.81675	89.8985
VLByog5651	2018-10-17	201905	GI1-2+3	5	30.46	7.96	62.27	242	1897	88.6658	VLByog5651	0	1	0	0	0	9.22	300	1123.4	1128	1125.7	2.8	1.8	0	0.02	0	0	0	1	0.238902	1.7687	6.91991	51.3227	88.1001	0.655744	5.12979	88.6658
VLByog5651	2018-10-17	201906	GI1-2+3	6	30	8.4	60.17	252	1805	87.7497	VLByog5651	0	1	0	0	0	9.22	300	1123.4	1128	1125.7	2.8	1.8	0	0.02	0	0	0	1	0.238902	1.7687	6.91991	51.3227	88.1001	0.691991	4.9568	87.7497
VLByog5651	2018-10-17	201907	GI1-2+3	7	30.58	5.88	46.31	180	1416	88.7335	VLByog5651	0	1	0	0	0	9.22	300	1123.4	1128	1125.7	2.8	1.8	0	0.02	0	0	0	1	0.238902	1.7687	6.91991	51.3227	88.1001	0.484394	3.81501	88.7335
VLByog5651	2018-10-17	201908	GI1-2+3	8	30.56	6.57	46.94	201	1435	87.7219	VLByog5651	0	1	0	0	0	9.22	300	1123.4	1128	1125.7	2.8	1.8	0	0.02	0	0	0	1	0.238902	1.7687	6.91991	51.3227	88.1001	0.541236	3.86691	87.7219
VLByog5651	2018-10-17	201909	GI1-2+3	9	29.71	5.1	50.22	152	1492	90.7809	VLByog5651	0	1	0	0	0	9.22	300	1123.4	1128	1125.7	2.8	1.8	0	0.02	0	0	0	1	0.238902	1.7687	6.91991	51.3227	88.1001	0.420137	4.13712	90.7809
VLByog5651	2018-10-17	201910	GI1-2+3	10	30.83	5.97	52.7	184	1625	89.8244	VLByog5651	0	1	0	0	0	9.22	300	1123.4	1128	1125.7	2.8	1.8	0	0.02	0	0	0	1	0.238902	1.7687	6.91991	51.3227	88.1001	0.491808	4.34142	89.8244
VLByog5651	2018-10-17	201901	GI4+5	1	31	4.07	103.8	126	3218	96.2269	VLByog5651	0	1	0	0	0	9.22	300	1130	1132.2	1131.1	2.2	1.8	0	0.12	0	0	0	1	1.43341	10.6122	41.5195	307.936	88.1001	2.01172	51.3062	96.2269
VLByog5651	2018-10-17	201902	GI4+5	2	27.92	5.79	118.38	162	3305	95.337	VLByog5651	0	1	0	0	0	9.22	300	1130	1132.2	1131.1	2.2	1.8	0	0.12	0	0	0	1	1.43341	10.6122	41.5195	307.936	88.1001	2.86188	58.5128	95.337
VLByog5651	2018-10-17	201903	GI4+5	3	30.5	4.95	90.46	151	2759	94.8119	VLByog5651	0	1	0	0	0	9.22	300	1130	1132.2	1131.1	2.2	1.8	0	0.12	0	0	0	1	1.43341	10.6122	41.5195	307.936	88.1001	2.44668	44.7125	94.8119
VLByog5651	2018-10-17	201904	GI4+5	4	30	6.57	58.47	197	1754	89.8985	VLByog5651	0	1	0	0	0	9.22	300	1130	1132.2	1131.1	2.2	1.8	0	0.12	0	0	0	1	1.43341	10.6122	41.5195	307.936	88.1001	3.24741	28.9005	89.8985
VLByog5651	2018-10-17	201905	GI4+5	5	30.46	7.96	62.27	242	1897	88.6658	VLByog5651	0	1	0	0	0	9.22	300	1130	1132.2	1131.1	2.2	1.8	0	0.12	0	0	0	1	1.43341	10.6122	41.5195	307.936	88.1001	3.93446	30.7788	88.6658
VLByog5651	2018-10-17	201906	GI4+5	6	30	8.4	60.17	252	1805	87.7497	VLByog5651	0	1	0	0	0	9.22	300	1130	1132.2	1131.1	2.2	1.8	0	0.12	0	0	0	1	1.43341	10.6122	41.5195	307.936	88.1001	4.15195	29.7408	87.7497
VLByog5651	2018-10-17	201907	GI4+5	7	30.58	5.88	46.31	180	1416	88.7335	VLByog5651	0	1	0	0	0	9.22	300	1130	1132.2	1131.1	2.2	1.8	0	0.12	0	0	0	1	1.43341	10.6122	41.5195	307.936	88.1001	2.90636	22.8901	88.7335
VLByog5651	2018-10-17	201908	GI4+5	8	30.56	6.57	46.94	201	1435	87.7219	VLByog5651	0	1	0	0	0	9.22	300	1130	1132.2	1131.1	2.2	1.8	0	0.12	0	0	0	1	1.43341	10.6122	41.5195	307.936	88.1001	3.24741	23.2015	87.7219
VLByog5651	2018-10-17	201909	GI4+5	9	29.71	5.1	50.22	152	1492	90.7809	VLByog5651	0	1	0	0	0	9.22	300	1130	1132.2	1131.1	2.2	1.8	0	0.12	0	0	0	1	1.43341	10.6122	41.5195	307.936	88.1001	2.52082	24.8227	90.7809
VLByog5651	2018-10-17	201910	GI4+5	10	30.83	5.97	52.7	184	1625	89.8244	VLByog5651	0	1	0	0	0	9.22	300	1130	1132.2	1131.1	2.2	1.8	0	0.12	0	0	0	1	1.43341	10.6122	41.5195	307.936	88.1001	2.95085	26.0485	89.8244
VLByog5651	2018-10-17	201901	GI6+7-10	1	31	4.07	103.8	126	3218	96.2269	VLByog5651	0	1	0	0	0	9.22	300	1137.2	1147.2	1142.2	6.6	1.1	0	0.09	45	2475	40	1	0.656979	4.86391	19.0297	141.137	88.1001	0.922037	23.5153	96.2269
VLByog5651	2018-10-17	201902	GI6+7-10	2	27.92	5.79	118.38	162	3305	95.337	VLByog5651	0	1	0	0	0	9.22	300	1137.2	1147.2	1142.2	6.6	1.1	0	0.09	45	2475	40	1	0.656979	4.86391	19.0297	141.137	88.1001	1.31169	26.8184	95.337
VLByog5651	2018-10-17	201903	GI6+7-10	3	30.5	4.95	90.46	151	2759	94.8119	VLByog5651	0	1	0	0	0	9.22	300	1137.2	1147.2	1142.2	6.6	1.1	0	0.09	45	2475	40	1	0.656979	4.86391	19.0297	141.137	88.1001	1.1214	20.4932	94.8119
VLByog5651	2018-10-17	201904	GI6+7-10	4	30	6.57	58.47	197	1754	89.8985	VLByog5651	0	1	0	0	0	9.22	300	1137.2	1147.2	1142.2	6.6	1.1	0	0.09	45	2475	40	1	0.656979	4.86391	19.0297	141.137	88.1001	1.4884	13.2461	89.8985
VLByog5651	2018-10-17	201905	GI6+7-10	5	30.46	7.96	62.27	242	1897	88.6658	VLByog5651	0	1	0	0	0	9.22	300	1137.2	1147.2	1142.2	6.6	1.1	0	0.09	45	2475	40	1	0.656979	4.86391	19.0297	141.137	88.1001	1.8033	14.1069	88.6658
VLByog5651	2018-10-17	201906	GI6+7-10	6	30	8.4	60.17	252	1805	87.7497	VLByog5651	0	1	0	0	0	9.22	300	1137.2	1147.2	1142.2	6.6	1.1	0	0.09	45	2475	40	1	0.656979	4.86391	19.0297	141.137	88.1001	1.90297	13.6312	87.7497
VLByog5651	2018-10-17	201907	GI6+7-10	7	30.58	5.88	46.31	180	1416	88.7335	VLByog5651	0	1	0	0	0	9.22	300	1137.2	1147.2	1142.2	6.6	1.1	0	0.09	45	2475	40	1	0.656979	4.86391	19.0297	141.137	88.1001	1.33208	10.4913	88.7335
VLByog5651	2018-10-17	201908	GI6+7-10	8	30.56	6.57	46.94	201	1435	87.7219	VLByog5651	0	1	0	0	0	9.22	300	1137.2	1147.2	1142.2	6.6	1.1	0	0.09	45	2475	40	1	0.656979	4.86391	19.0297	141.137	88.1001	1.4884	10.634	87.7219
VLByog5651	2018-10-17	201909	GI6+7-10	9	29.71	5.1	50.22	152	1492	90.7809	VLByog5651	0	1	0	0	0	9.22	300	1137.2	1147.2	1142.2	6.6	1.1	0	0.09	45	2475	40	1	0.656979	4.86391	19.0297	141.137	88.1001	1.15538	11.3771	90.7809
VLByog5651	2018-10-17	201910	GI6+7-10	10	30.83	5.97	52.7	184	1625	89.8244	VLByog5651	0	1	0	0	0	9.22	300	1137.2	1147.2	1142.2	6.6	1.1	0	0.09	45	2475	40	1	0.656979	4.86391	19.0297	141.137	88.1001	1.35247	11.9389	89.8244
VLByog5651	2018-10-17	201901	GII2	1	31	4.07	103.8	126	3218	96.2269	VLByog5651	0	1	0	0	0	9.22	300	1175.4	1178.5	1176.95	3.1	0.6	0	0.09	48	2321	40	1	0.358352	2.65304	10.3799	76.984	88.1001	0.502929	12.8265	96.2269
VLByog5651	2018-10-17	201902	GII2	2	27.92	5.79	118.38	162	3305	95.337	VLByog5651	0	1	0	0	0	9.22	300	1175.4	1178.5	1176.95	3.1	0.6	0	0.09	48	2321	40	1	0.358352	2.65304	10.3799	76.984	88.1001	0.715469	14.6282	95.337
VLByog5651	2018-10-17	201903	GII2	3	30.5	4.95	90.46	151	2759	94.8119	VLByog5651	0	1	0	0	0	9.22	300	1175.4	1178.5	1176.95	3.1	0.6	0	0.09	48	2321	40	1	0.358352	2.65304	10.3799	76.984	88.1001	0.61167	11.1781	94.8119
VLByog5651	2018-10-17	201904	GII2	4	30	6.57	58.47	197	1754	89.8985	VLByog5651	0	1	0	0	0	9.22	300	1175.4	1178.5	1176.95	3.1	0.6	0	0.09	48	2321	40	1	0.358352	2.65304	10.3799	76.984	88.1001	0.811854	7.22513	89.8985
VLByog5651	2018-10-17	201905	GII2	5	30.46	7.96	62.27	242	1897	88.6658	VLByog5651	0	1	0	0	0	9.22	300	1175.4	1178.5	1176.95	3.1	0.6	0	0.09	48	2321	40	1	0.358352	2.65304	10.3799	76.984	88.1001	0.983616	7.69469	88.6658
VLByog5651	2018-10-17	201906	GII2	6	30	8.4	60.17	252	1805	87.7497	VLByog5651	0	1	0	0	0	9.22	300	1175.4	1178.5	1176.95	3.1	0.6	0	0.09	48	2321	40	1	0.358352	2.65304	10.3799	76.984	88.1001	1.03799	7.43519	87.7497
VLByog5651	2018-10-17	201907	GII2	7	30.58	5.88	46.31	180	1416	88.7335	VLByog5651	0	1	0	0	0	9.22	300	1175.4	1178.5	1176.95	3.1	0.6	0	0.09	48	2321	40	1	0.358352	2.65304	10.3799	76.984	88.1001	0.72659	5.72252	88.7335
VLByog5651	2018-10-17	201908	GII2	8	30.56	6.57	46.94	201	1435	87.7219	VLByog5651	0	1	0	0	0	9.22	300	1175.4	1178.5	1176.95	3.1	0.6	0	0.09	48	2321	40	1	0.358352	2.65304	10.3799	76.984	88.1001	0.811854	5.80037	87.7219
VLByog5651	2018-10-17	201909	GII2	9	29.71	5.1	50.22	152	1492	90.7809	VLByog5651	0	1	0	0	0	9.22	300	1175.4	1178.5	1176.95	3.1	0.6	0	0.09	48	2321	40	1	0.358352	2.65304	10.3799	76.984	88.1001	0.630206	6.20568	90.7809
VLByog5651	2018-10-17	201910	GII2	10	30.83	5.97	52.7	184	1625	89.8244	VLByog5651	0	1	0	0	0	9.22	300	1175.4	1178.5	1176.95	3.1	0.6	0	0.09	48	2321	40	1	0.358352	2.65304	10.3799	76.984	88.1001	0.737712	6.51213	89.8244
VLByog5651	2018-10-17	201901	GII12-14	1	31	4.07	103.8	126	3218	96.2269	VLByog5651	0	1	0	0	0	9.22	300	1193.9	1197.5	1195.7	2.1	1.6	0	0.02	47	2680	40	1	0.212357	1.57217	6.15103	45.6201	88.1001	0.298032	7.60092	96.2269
VLByog5651	2018-10-17	201902	GII12-14	2	27.92	5.79	118.38	162	3305	95.337	VLByog5651	0	1	0	0	0	9.22	300	1193.9	1197.5	1195.7	2.1	1.6	0	0.02	47	2680	40	1	0.212357	1.57217	6.15103	45.6201	88.1001	0.423982	8.66856	95.337
VLByog5651	2018-10-17	201903	GII12-14	3	30.5	4.95	90.46	151	2759	94.8119	VLByog5651	0	1	0	0	0	9.22	300	1193.9	1197.5	1195.7	2.1	1.6	0	0.02	47	2680	40	1	0.212357	1.57217	6.15103	45.6201	88.1001	0.362471	6.62407	94.8119
VLByog5651	2018-10-17	201904	GII12-14	4	30	6.57	58.47	197	1754	89.8985	VLByog5651	0	1	0	0	0	9.22	300	1193.9	1197.5	1195.7	2.1	1.6	0	0.02	47	2680	40	1	0.212357	1.57217	6.15103	45.6201	88.1001	0.481098	4.28156	89.8985
VLByog5651	2018-10-17	201905	GII12-14	5	30.46	7.96	62.27	242	1897	88.6658	VLByog5651	0	1	0	0	0	9.22	300	1193.9	1197.5	1195.7	2.1	1.6	0	0.02	47	2680	40	1	0.212357	1.57217	6.15103	45.6201	88.1001	0.582883	4.55982	88.6658
VLByog5651	2018-10-17	201906	GII12-14	6	30	8.4	60.17	252	1805	87.7497	VLByog5651	0	1	0	0	0	9.22	300	1193.9	1197.5	1195.7	2.1	1.6	0	0.02	47	2680	40	1	0.212357	1.57217	6.15103	45.6201	88.1001	0.615103	4.40604	87.7497
VLByog5651	2018-10-17	201907	GII12-14	7	30.58	5.88	46.31	180	1416	88.7335	VLByog5651	0	1	0	0	0	9.22	300	1193.9	1197.5	1195.7	2.1	1.6	0	0.02	47	2680	40	1	0.212357	1.57217	6.15103	45.6201	88.1001	0.430572	3.39112	88.7335
VLByog5651	2018-10-17	201908	GII12-14	8	30.56	6.57	46.94	201	1435	87.7219	VLByog5651	0	1	0	0	0	9.22	300	1193.9	1197.5	1195.7	2.1	1.6	0	0.02	47	2680	40	1	0.212357	1.57217	6.15103	45.6201	88.1001	0.481098	3.43725	87.7219
VLByog5651	2018-10-17	201909	GII12-14	9	29.71	5.1	50.22	152	1492	90.7809	VLByog5651	0	1	0	0	0	9.22	300	1193.9	1197.5	1195.7	2.1	1.6	0	0.02	47	2680	40	1	0.212357	1.57217	6.15103	45.6201	88.1001	0.373455	3.67744	90.7809
VLByog5651	2018-10-17	201910	GII12-14	10	30.83	5.97	52.7	184	1625	89.8244	VLByog5651	0	1	0	0	0	9.22	300	1193.9	1197.5	1195.7	2.1	1.6	0	0.02	47	2680	40	1	0.212357	1.57217	6.15103	45.6201	88.1001	0.437162	3.85904	89.8244
DQshHMRWVD	2018-10-26	201811	G2_17-G2_18	1	23	0.75	47.56	17	1094	98.4475	DQshHMRWVD	0	1	0	0	0	10.24	212	1102.1	1105	1103.55	2.4	1.6	28.2	0.231	24	80.1	13	1	0.132761	6.56394	4.0137	196.98	98.0175	0.23156	14.684	98.4475
DQshHMRWVD	2018-10-26	201812	G2_17-G2_18	2	30.88	1.91	80.63	59	2489	97.686	DQshHMRWVD	0	1	0	0	0	10.24	212	1102.1	1105	1103.55	2.4	1.6	28.2	0.231	24	80.1	13	1	0.132761	6.56394	4.0137	196.98	98.0175	0.589705	24.8942	97.686
DQshHMRWVD	2018-10-26	201901	G2_17-G2_18	3	31	2.51	81.55	78	2528	97.014	DQshHMRWVD	0	1	0	0	0	10.24	212	1102.1	1105	1103.55	2.4	1.6	28.2	0.231	24	80.1	13	1	0.132761	6.56394	4.0137	196.98	98.0175	0.774953	25.1782	97.014
DQshHMRWVD	2018-10-26	201902	G2_17-G2_18	4	28	1.96	84.59	55	2368	97.7354	DQshHMRWVD	0	1	0	0	0	10.24	212	1102.1	1105	1103.55	2.4	1.6	28.2	0.231	24	80.1	13	1	0.132761	6.56394	4.0137	196.98	98.0175	0.605142	26.1168	97.7354
DQshHMRWVD	2018-10-26	201903	G2_17-G2_18	5	29.79	2.28	84.33	68	2511	97.3675	DQshHMRWVD	0	1	0	0	0	10.24	212	1102.1	1105	1103.55	2.4	1.6	28.2	0.231	24	80.1	13	1	0.132761	6.56394	4.0137	196.98	98.0175	0.703941	26.0366	97.3675
DQshHMRWVD	2018-10-26	201904	G2_17-G2_18	6	27.56	4.51	150.4	124	4145	97.0886	DQshHMRWVD	0	1	0	0	0	10.24	212	1102.1	1105	1103.55	2.4	1.6	28.2	0.231	24	80.1	13	1	0.132761	6.56394	4.0137	196.98	98.0175	1.39245	46.4354	97.0886
DQshHMRWVD	2018-10-26	201905	G2_17-G2_18	7	29.3	3.88	154.42	114	4524	97.549	DQshHMRWVD	0	1	0	0	0	10.24	212	1102.1	1105	1103.55	2.4	1.6	28.2	0.231	24	80.1	13	1	0.132761	6.56394	4.0137	196.98	98.0175	1.19794	47.6766	97.549
DQshHMRWVD	2018-10-26	201906	G2_17-G2_18	8	28.52	2.58	133.55	74	3809	98.1048	DQshHMRWVD	0	1	0	0	0	10.24	212	1102.1	1105	1103.55	2.4	1.6	28.2	0.231	24	80.1	13	1	0.132761	6.56394	4.0137	196.98	98.0175	0.796565	41.233	98.1048
DQshHMRWVD	2018-10-26	201907	G2_17-G2_18	9	29.38	2.81	134.6	83	3954	97.955	DQshHMRWVD	0	1	0	0	0	10.24	212	1102.1	1105	1103.55	2.4	1.6	28.2	0.231	24	80.1	13	1	0.132761	6.56394	4.0137	196.98	98.0175	0.867577	41.5572	97.955
DQshHMRWVD	2018-10-26	201908	G2_17-G2_18	10	31	2.31	134.06	72	4156	98.3061	DQshHMRWVD	0	1	0	0	0	10.24	212	1102.1	1105	1103.55	2.4	1.6	28.2	0.231	24	80.1	13	1	0.132761	6.56394	4.0137	196.98	98.0175	0.713204	41.3905	98.3061
DQshHMRWVD	2018-10-26	201909	G2_17-G2_18	11	29.94	2.44	126.63	73	3791	98.1096	DQshHMRWVD	0	1	0	0	0	10.24	212	1102.1	1105	1103.55	2.4	1.6	28.2	0.231	24	80.1	13	1	0.132761	6.56394	4.0137	196.98	98.0175	0.753341	39.0965	98.1096
DQshHMRWVD	2018-10-26	201910	G2_17-G2_18	12	31	2.61	121.83	81	3777	97.9026	DQshHMRWVD	0	1	0	0	0	10.24	212	1102.1	1105	1103.55	2.4	1.6	28.2	0.231	24	80.1	13	1	0.132761	6.56394	4.0137	196.98	98.0175	0.805827	37.6145	97.9026
lgHJDW2641	2018-10-29	201811	PⅡ10	1	19.83	4.83	73.36	96	1455	93.8227	lgHJDW2641	0	1	0	0	0	8.91	200	939.8	943.4	941.6	3.4	0.5	29.1	0.27	31	90.82	14	1	0.57033	8.73956	16.978	261.429	93.8739	0.796154	12.0923	93.8227
lgHJDW2641	2018-10-29	201812	PⅡ10	2	30.56	5.59	70.22	171	2146	92.6263	lgHJDW2641	0	1	0	0	0	8.91	200	939.8	943.4	941.6	3.4	0.5	29.1	0.27	31	90.82	14	1	0.57033	8.73956	16.978	261.429	93.8739	0.921429	11.5747	92.6263
lgHJDW2641	2018-10-29	201901	PⅡ10	3	30.77	5.4	66.04	166	2032	92.4412	lgHJDW2641	0	1	0	0	0	8.91	200	939.8	943.4	941.6	3.4	0.5	29.1	0.27	31	90.82	14	1	0.57033	8.73956	16.978	261.429	93.8739	0.89011	10.8857	92.4412
lgHJDW2641	2018-10-29	201902	PⅡ10	4	27.94	5.36	62.37	150	1743	92.0862	lgHJDW2641	0	1	0	0	0	8.91	200	939.8	943.4	941.6	3.4	0.5	29.1	0.27	31	90.82	14	1	0.57033	8.73956	16.978	261.429	93.8739	0.883516	10.2808	92.0862
lgHJDW2641	2018-10-29	201903	PⅡ10	5	30.69	5.16	61.68	158	1893	92.2801	lgHJDW2641	0	1	0	0	0	8.91	200	939.8	943.4	941.6	3.4	0.5	29.1	0.27	31	90.82	14	1	0.57033	8.73956	16.978	261.429	93.8739	0.850549	10.167	92.2801
lgHJDW2641	2018-10-29	201904	PⅡ10	6	29.79	5.01	61.22	149	1824	92.4355	lgHJDW2641	0	1	0	0	0	8.91	200	939.8	943.4	941.6	3.4	0.5	29.1	0.27	31	90.82	14	1	0.57033	8.73956	16.978	261.429	93.8739	0.825824	10.0912	92.4355
lgHJDW2641	2018-10-29	201905	PⅡ10	7	30.96	5.03	61.36	156	1900	92.4236	lgHJDW2641	0	1	0	0	0	8.91	200	939.8	943.4	941.6	3.4	0.5	29.1	0.27	31	90.82	14	1	0.57033	8.73956	16.978	261.429	93.8739	0.829121	10.1143	92.4236
lgHJDW2641	2018-10-29	201906	PⅡ10	8	29.94	4.98	61.98	149	1856	92.5627	lgHJDW2641	0	1	0	0	0	8.91	200	939.8	943.4	941.6	3.4	0.5	29.1	0.27	31	90.82	14	1	0.57033	8.73956	16.978	261.429	93.8739	0.820879	10.2165	92.5627
lgHJDW2641	2018-10-29	201907	PⅡ10	9	30.73	4.73	61.47	145	1889	92.855	lgHJDW2641	0	1	0	0	0	8.91	200	939.8	943.4	941.6	3.4	0.5	29.1	0.27	31	90.82	14	1	0.57033	8.73956	16.978	261.429	93.8739	0.77967	10.1324	92.855
lgHJDW2641	2018-10-29	201908	PⅡ10	10	23.02	4.88	61.72	112	1421	92.6727	lgHJDW2641	0	1	0	0	0	8.91	200	939.8	943.4	941.6	3.4	0.5	29.1	0.27	31	90.82	14	1	0.57033	8.73956	16.978	261.429	93.8739	0.804396	10.1736	92.6727
lgHJDW2641	2018-10-29	201909	PⅡ10	11	28.58	4.47	74.88	128	2140	94.3667	lgHJDW2641	0	1	0	0	0	8.91	200	939.8	943.4	941.6	3.4	0.5	29.1	0.27	31	90.82	14	1	0.57033	8.73956	16.978	261.429	93.8739	0.736813	12.3429	94.3667
lgHJDW2641	2018-10-29	201910	PⅡ10	12	30.96	4.27	76.59	132	2371	94.7193	lgHJDW2641	0	1	0	0	0	8.91	200	939.8	943.4	941.6	3.4	0.5	29.1	0.27	31	90.82	14	1	0.57033	8.73956	16.978	261.429	93.8739	0.703846	12.6247	94.7193
lgHJDW2641	2018-10-29	201811	GⅠ1-GⅠ2+3\3	1	19.83	4.83	73.36	96	1455	93.8227	lgHJDW2641	0	1	0	0	0	8.91	200	945.2	949.4	947.3	3.8	1.5	28.4	0.16	40	91.14	14	1	1.01392	15.537	30.1832	464.762	93.8739	1.41538	21.4974	93.8227
lgHJDW2641	2018-10-29	201812	GⅠ1-GⅠ2+3\3	2	30.56	5.59	70.22	171	2146	92.6263	lgHJDW2641	0	1	0	0	0	8.91	200	945.2	949.4	947.3	3.8	1.5	28.4	0.16	40	91.14	14	1	1.01392	15.537	30.1832	464.762	93.8739	1.6381	20.5773	92.6263
lgHJDW2641	2018-10-29	201901	GⅠ1-GⅠ2+3\3	3	30.77	5.4	66.04	166	2032	92.4412	lgHJDW2641	0	1	0	0	0	8.91	200	945.2	949.4	947.3	3.8	1.5	28.4	0.16	40	91.14	14	1	1.01392	15.537	30.1832	464.762	93.8739	1.58242	19.3524	92.4412
lgHJDW2641	2018-10-29	201902	GⅠ1-GⅠ2+3\3	4	27.94	5.36	62.37	150	1743	92.0862	lgHJDW2641	0	1	0	0	0	8.91	200	945.2	949.4	947.3	3.8	1.5	28.4	0.16	40	91.14	14	1	1.01392	15.537	30.1832	464.762	93.8739	1.5707	18.2769	92.0862
lgHJDW2641	2018-10-29	201903	GⅠ1-GⅠ2+3\3	5	30.69	5.16	61.68	158	1893	92.2801	lgHJDW2641	0	1	0	0	0	8.91	200	945.2	949.4	947.3	3.8	1.5	28.4	0.16	40	91.14	14	1	1.01392	15.537	30.1832	464.762	93.8739	1.51209	18.0747	92.2801
lgHJDW2641	2018-10-29	201904	GⅠ1-GⅠ2+3\3	6	29.79	5.01	61.22	149	1824	92.4355	lgHJDW2641	0	1	0	0	0	8.91	200	945.2	949.4	947.3	3.8	1.5	28.4	0.16	40	91.14	14	1	1.01392	15.537	30.1832	464.762	93.8739	1.46813	17.9399	92.4355
lgHJDW2641	2018-10-29	201905	GⅠ1-GⅠ2+3\3	7	30.96	5.03	61.36	156	1900	92.4236	lgHJDW2641	0	1	0	0	0	8.91	200	945.2	949.4	947.3	3.8	1.5	28.4	0.16	40	91.14	14	1	1.01392	15.537	30.1832	464.762	93.8739	1.47399	17.981	92.4236
lgHJDW2641	2018-10-29	201906	GⅠ1-GⅠ2+3\3	8	29.94	4.98	61.98	149	1856	92.5627	lgHJDW2641	0	1	0	0	0	8.91	200	945.2	949.4	947.3	3.8	1.5	28.4	0.16	40	91.14	14	1	1.01392	15.537	30.1832	464.762	93.8739	1.45934	18.1626	92.5627
lgHJDW2641	2018-10-29	201907	GⅠ1-GⅠ2+3\3	9	30.73	4.73	61.47	145	1889	92.855	lgHJDW2641	0	1	0	0	0	8.91	200	945.2	949.4	947.3	3.8	1.5	28.4	0.16	40	91.14	14	1	1.01392	15.537	30.1832	464.762	93.8739	1.38608	18.0132	92.855
lgHJDW2641	2018-10-29	201908	GⅠ1-GⅠ2+3\3	10	23.02	4.88	61.72	112	1421	92.6727	lgHJDW2641	0	1	0	0	0	8.91	200	945.2	949.4	947.3	3.8	1.5	28.4	0.16	40	91.14	14	1	1.01392	15.537	30.1832	464.762	93.8739	1.43004	18.0864	92.6727
lgHJDW2641	2018-10-29	201909	GⅠ1-GⅠ2+3\3	11	28.58	4.47	74.88	128	2140	94.3667	lgHJDW2641	0	1	0	0	0	8.91	200	945.2	949.4	947.3	3.8	1.5	28.4	0.16	40	91.14	14	1	1.01392	15.537	30.1832	464.762	93.8739	1.30989	21.9429	94.3667
lgHJDW2641	2018-10-29	201910	GⅠ1-GⅠ2+3\3	12	30.96	4.27	76.59	132	2371	94.7193	lgHJDW2641	0	1	0	0	0	8.91	200	945.2	949.4	947.3	3.8	1.5	28.4	0.16	40	91.14	14	1	1.01392	15.537	30.1832	464.762	93.8739	1.25128	22.444	94.7193
lgHJDW2641	2018-10-29	201811	GⅠ6+7\3-GⅠ6-8	1	19.83	4.83	73.36	96	1455	93.8227	lgHJDW2641	0	1	0	0	0	8.91	200	960	963.9	961.95	3.8	1.8	28.8	0.2	43	91.8	14	1	1.52088	23.3055	45.2747	697.143	93.8739	2.12308	32.2462	93.8227
lgHJDW2641	2018-10-29	201812	GⅠ6+7\3-GⅠ6-8	2	30.56	5.59	70.22	171	2146	92.6263	lgHJDW2641	0	1	0	0	0	8.91	200	960	963.9	961.95	3.8	1.8	28.8	0.2	43	91.8	14	1	1.52088	23.3055	45.2747	697.143	93.8739	2.45714	30.8659	92.6263
lgHJDW2641	2018-10-29	201901	GⅠ6+7\3-GⅠ6-8	3	30.77	5.4	66.04	166	2032	92.4412	lgHJDW2641	0	1	0	0	0	8.91	200	960	963.9	961.95	3.8	1.8	28.8	0.2	43	91.8	14	1	1.52088	23.3055	45.2747	697.143	93.8739	2.37363	29.0286	92.4412
lgHJDW2641	2018-10-29	201902	GⅠ6+7\3-GⅠ6-8	4	27.94	5.36	62.37	150	1743	92.0862	lgHJDW2641	0	1	0	0	0	8.91	200	960	963.9	961.95	3.8	1.8	28.8	0.2	43	91.8	14	1	1.52088	23.3055	45.2747	697.143	93.8739	2.35604	27.4154	92.0862
lgHJDW2641	2018-10-29	201903	GⅠ6+7\3-GⅠ6-8	5	30.69	5.16	61.68	158	1893	92.2801	lgHJDW2641	0	1	0	0	0	8.91	200	960	963.9	961.95	3.8	1.8	28.8	0.2	43	91.8	14	1	1.52088	23.3055	45.2747	697.143	93.8739	2.26813	27.1121	92.2801
lgHJDW2641	2018-10-29	201904	GⅠ6+7\3-GⅠ6-8	6	29.79	5.01	61.22	149	1824	92.4355	lgHJDW2641	0	1	0	0	0	8.91	200	960	963.9	961.95	3.8	1.8	28.8	0.2	43	91.8	14	1	1.52088	23.3055	45.2747	697.143	93.8739	2.2022	26.9099	92.4355
lgHJDW2641	2018-10-29	201905	GⅠ6+7\3-GⅠ6-8	7	30.96	5.03	61.36	156	1900	92.4236	lgHJDW2641	0	1	0	0	0	8.91	200	960	963.9	961.95	3.8	1.8	28.8	0.2	43	91.8	14	1	1.52088	23.3055	45.2747	697.143	93.8739	2.21099	26.9714	92.4236
lgHJDW2641	2018-10-29	201906	GⅠ6+7\3-GⅠ6-8	8	29.94	4.98	61.98	149	1856	92.5627	lgHJDW2641	0	1	0	0	0	8.91	200	960	963.9	961.95	3.8	1.8	28.8	0.2	43	91.8	14	1	1.52088	23.3055	45.2747	697.143	93.8739	2.18901	27.244	92.5627
lgHJDW2641	2018-10-29	201907	GⅠ6+7\3-GⅠ6-8	9	30.73	4.73	61.47	145	1889	92.855	lgHJDW2641	0	1	0	0	0	8.91	200	960	963.9	961.95	3.8	1.8	28.8	0.2	43	91.8	14	1	1.52088	23.3055	45.2747	697.143	93.8739	2.07912	27.0198	92.855
lgHJDW2641	2018-10-29	201908	GⅠ6+7\3-GⅠ6-8	10	23.02	4.88	61.72	112	1421	92.6727	lgHJDW2641	0	1	0	0	0	8.91	200	960	963.9	961.95	3.8	1.8	28.8	0.2	43	91.8	14	1	1.52088	23.3055	45.2747	697.143	93.8739	2.14505	27.1297	92.6727
lgHJDW2641	2018-10-29	201909	GⅠ6+7\3-GⅠ6-8	11	28.58	4.47	74.88	128	2140	94.3667	lgHJDW2641	0	1	0	0	0	8.91	200	960	963.9	961.95	3.8	1.8	28.8	0.2	43	91.8	14	1	1.52088	23.3055	45.2747	697.143	93.8739	1.96484	32.9143	94.3667
lgHJDW2641	2018-10-29	201910	GⅠ6+7\3-GⅠ6-8	12	30.96	4.27	76.59	132	2371	94.7193	lgHJDW2641	0	1	0	0	0	8.91	200	960	963.9	961.95	3.8	1.8	28.8	0.2	43	91.8	14	1	1.52088	23.3055	45.2747	697.143	93.8739	1.87692	33.6659	94.7193
lgHJDW2641	2018-10-29	201811	GⅠ8-GⅠ9	1	19.83	4.83	73.36	96	1455	93.8227	lgHJDW2641	0	1	0	0	0	8.91	200	965.6	969.6	967.6	2.2	0.7	28.1	0.12	45	91.35	14	1	0.354872	5.43795	10.5641	162.667	93.8739	0.495385	7.5241	93.8227
lgHJDW2641	2018-10-29	201812	GⅠ8-GⅠ9	2	30.56	5.59	70.22	171	2146	92.6263	lgHJDW2641	0	1	0	0	0	8.91	200	965.6	969.6	967.6	2.2	0.7	28.1	0.12	45	91.35	14	1	0.354872	5.43795	10.5641	162.667	93.8739	0.573333	7.20205	92.6263
lgHJDW2641	2018-10-29	201901	GⅠ8-GⅠ9	3	30.77	5.4	66.04	166	2032	92.4412	lgHJDW2641	0	1	0	0	0	8.91	200	965.6	969.6	967.6	2.2	0.7	28.1	0.12	45	91.35	14	1	0.354872	5.43795	10.5641	162.667	93.8739	0.553846	6.77333	92.4412
lgHJDW2641	2018-10-29	201902	GⅠ8-GⅠ9	4	27.94	5.36	62.37	150	1743	92.0862	lgHJDW2641	0	1	0	0	0	8.91	200	965.6	969.6	967.6	2.2	0.7	28.1	0.12	45	91.35	14	1	0.354872	5.43795	10.5641	162.667	93.8739	0.549744	6.39692	92.0862
lgHJDW2641	2018-10-29	201903	GⅠ8-GⅠ9	5	30.69	5.16	61.68	158	1893	92.2801	lgHJDW2641	0	1	0	0	0	8.91	200	965.6	969.6	967.6	2.2	0.7	28.1	0.12	45	91.35	14	1	0.354872	5.43795	10.5641	162.667	93.8739	0.529231	6.32615	92.2801
lgHJDW2641	2018-10-29	201904	GⅠ8-GⅠ9	6	29.79	5.01	61.22	149	1824	92.4355	lgHJDW2641	0	1	0	0	0	8.91	200	965.6	969.6	967.6	2.2	0.7	28.1	0.12	45	91.35	14	1	0.354872	5.43795	10.5641	162.667	93.8739	0.513846	6.27897	92.4355
lgHJDW2641	2018-10-29	201905	GⅠ8-GⅠ9	7	30.96	5.03	61.36	156	1900	92.4236	lgHJDW2641	0	1	0	0	0	8.91	200	965.6	969.6	967.6	2.2	0.7	28.1	0.12	45	91.35	14	1	0.354872	5.43795	10.5641	162.667	93.8739	0.515897	6.29333	92.4236
lgHJDW2641	2018-10-29	201906	GⅠ8-GⅠ9	8	29.94	4.98	61.98	149	1856	92.5627	lgHJDW2641	0	1	0	0	0	8.91	200	965.6	969.6	967.6	2.2	0.7	28.1	0.12	45	91.35	14	1	0.354872	5.43795	10.5641	162.667	93.8739	0.510769	6.35692	92.5627
lgHJDW2641	2018-10-29	201907	GⅠ8-GⅠ9	9	30.73	4.73	61.47	145	1889	92.855	lgHJDW2641	0	1	0	0	0	8.91	200	965.6	969.6	967.6	2.2	0.7	28.1	0.12	45	91.35	14	1	0.354872	5.43795	10.5641	162.667	93.8739	0.485128	6.30462	92.855
lgHJDW2641	2018-10-29	201908	GⅠ8-GⅠ9	10	23.02	4.88	61.72	112	1421	92.6727	lgHJDW2641	0	1	0	0	0	8.91	200	965.6	969.6	967.6	2.2	0.7	28.1	0.12	45	91.35	14	1	0.354872	5.43795	10.5641	162.667	93.8739	0.500513	6.33026	92.6727
lgHJDW2641	2018-10-29	201909	GⅠ8-GⅠ9	11	28.58	4.47	74.88	128	2140	94.3667	lgHJDW2641	0	1	0	0	0	8.91	200	965.6	969.6	967.6	2.2	0.7	28.1	0.12	45	91.35	14	1	0.354872	5.43795	10.5641	162.667	93.8739	0.458462	7.68	94.3667
lgHJDW2641	2018-10-29	201910	GⅠ8-GⅠ9	12	30.96	4.27	76.59	132	2371	94.7193	lgHJDW2641	0	1	0	0	0	8.91	200	965.6	969.6	967.6	2.2	0.7	28.1	0.12	45	91.35	14	1	0.354872	5.43795	10.5641	162.667	93.8739	0.437949	7.85538	94.7193
EYoqQb8830	2018-11-18	201812	S1_2-S1_4+5\2	1	31	8.36	205.63	259	6375	96.0933	EYoqQb8830	0	1	0	0	0	9.29	125	840.1	849.9	845	5.6	3.4	30.1	0.15	22	175.78	29	2	0	0	0	0	0	1.25585	30.8899	96.0933
EYoqQb8830	2018-11-18	201901	S1_2-S1_4+5\2	2	29.96	4.31	103.06	129	3088	95.9858	EYoqQb8830	0	1	0	0	0	9.29	125	840.1	849.9	845	5.6	3.4	30.1	0.15	22	175.78	29	2	0	0	0	0	0	0.647452	15.4818	95.9858
EYoqQb8830	2018-11-18	201902	S1_2-S1_4+5\2	3	28	2.42	89.79	68	2514	97.3756	EYoqQb8830	0	1	0	0	0	9.29	125	840.1	849.9	845	5.6	3.4	30.1	0.15	22	175.78	29	2	0	0	0	0	0	0.363535	13.4883	97.3756
EYoqQb8830	2018-11-18	201903	S1_2-S1_4+5\2	4	21.92	8.6	160.85	188	3525	94.9248	EYoqQb8830	0	1	0	0	0	9.29	125	840.1	849.9	845	5.6	3.4	30.1	0.15	22	175.78	29	2	0	0	0	0	0	1.2919	24.163	94.9248
EYoqQb8830	2018-11-18	201904	S1_2-S1_4+5\2	5	29.94	8.82	142.42	264	4264	94.1682	EYoqQb8830	0	1	0	0	0	9.29	125	840.1	849.9	845	5.6	3.4	30.1	0.15	22	175.78	29	2	0	0	0	0	0	1.32495	21.3945	94.1682
EYoqQb8830	2018-11-18	201905	S1_2-S1_4+5\2	6	30.92	11.83	155.03	366	4793	92.9102	EYoqQb8830	0	1	0	0	0	9.29	125	840.1	849.9	845	5.6	3.4	30.1	0.15	22	175.78	29	2	0	0	0	0	0	1.77711	23.2887	92.9102
EYoqQb8830	2018-11-18	201906	S1_2-S1_4+5\2	7	29.54	13.69	178.15	404	5263	92.8638	EYoqQb8830	0	1	0	0	0	9.29	125	840.1	849.9	845	5.6	3.4	30.1	0.15	22	175.78	29	2	0	0	0	0	0	2.05652	26.7619	92.8638
EYoqQb8830	2018-11-18	201907	S1_2-S1_4+5\2	8	28.69	10.59	146.73	304	4209	93.2685	EYoqQb8830	0	1	0	0	0	9.29	125	840.1	849.9	845	5.6	3.4	30.1	0.15	22	175.78	29	2	0	0	0	0	0	1.59084	22.0419	93.2685
EYoqQb8830	2018-11-18	201908	S1_2-S1_4+5\2	9	30.96	12.96	146.99	401	4551	91.8975	EYoqQb8830	0	1	0	0	0	9.29	125	840.1	849.9	845	5.6	3.4	30.1	0.15	22	175.78	29	2	0	0	0	0	0	1.94686	22.081	91.8975
EYoqQb8830	2018-11-18	201909	S1_2-S1_4+5\2	10	30	12.56	157.16	377	4715	92.5996	EYoqQb8830	0	1	0	0	0	9.29	125	840.1	849.9	845	5.6	3.4	30.1	0.15	22	175.78	29	2	0	0	0	0	0	1.88677	23.6087	92.5996
EYoqQb8830	2018-11-18	201910	S1_2-S1_4+5\2	11	31	11.85	148.34	367	4598	92.6025	EYoqQb8830	0	1	0	0	0	9.29	125	840.1	849.9	845	5.6	3.4	30.1	0.15	22	175.78	29	2	0	0	0	0	0	1.78012	22.2838	92.6025
EYoqQb8830	2018-11-18	201911	S1_2-S1_4+5\2	12	28.67	9.38	140.88	269	4038	93.7575	EYoqQb8830	0	1	0	0	0	9.29	125	840.1	849.9	845	5.6	3.4	30.1	0.15	22	175.78	29	2	0	0	0	0	0	1.40907	21.1631	93.7575
ObeWxz1833	2018-12-07	201901	P2_4-P2_5	1	30.88	9.38	103.95	290	3210	91.7233	ObeWxz1833	0	1	0	0	0	8.55	220	980.7	985.4	983.05	3.7	1.1	29.7	0.26	28	91.58	15	1	0.533413	11.6972	5.2963	116.519	95.6387	3.54852	39.325	91.7233
ObeWxz1833	2018-12-07	201902	P2_4-P2_5	2	27.96	11.33	113.32	317	3168	90.9105	ObeWxz1833	0	1	0	0	0	8.55	220	980.7	985.4	983.05	3.7	1.1	29.7	0.26	28	91.58	15	1	0.533413	11.6972	5.2963	116.519	95.6387	4.28622	42.8697	90.9105
ObeWxz1833	2018-12-07	201903	P2_4-P2_5	3	30.9	10.83	109.96	335	3397	91.034	ObeWxz1833	0	1	0	0	0	8.55	220	980.7	985.4	983.05	3.7	1.1	29.7	0.26	28	91.58	15	1	0.533413	11.6972	5.2963	116.519	95.6387	4.09706	41.5986	91.034
ObeWxz1833	2018-12-07	201904	P2_4-P2_5	4	29.73	8.34	76.56	248	2276	90.1767	ObeWxz1833	0	1	0	0	0	8.55	220	980.7	985.4	983.05	3.7	1.1	29.7	0.26	28	91.58	15	1	0.533413	11.6972	5.2963	116.519	95.6387	3.15508	28.9632	90.1767
ObeWxz1833	2018-12-07	201905	P2_4-P2_5	5	30.75	6.34	64.41	195	1981	91.0389	ObeWxz1833	0	1	0	0	0	8.55	220	980.7	985.4	983.05	3.7	1.1	29.7	0.26	28	91.58	15	1	0.533413	11.6972	5.2963	116.519	95.6387	2.39847	24.3667	91.0389
ObeWxz1833	2018-12-07	201906	P2_4-P2_5	6	29.48	5.65	52.97	167	1562	90.3617	ObeWxz1833	0	1	0	0	0	8.55	220	980.7	985.4	983.05	3.7	1.1	29.7	0.26	28	91.58	15	1	0.533413	11.6972	5.2963	116.519	95.6387	2.13743	20.0389	90.3617
ObeWxz1833	2018-12-07	201907	P2_4-P2_5	7	30.9	6.39	49.53	197	1530	88.573	ObeWxz1833	0	1	0	0	0	8.55	220	980.7	985.4	983.05	3.7	1.1	29.7	0.26	28	91.58	15	1	0.533413	11.6972	5.2963	116.519	95.6387	2.41738	18.7375	88.573
ObeWxz1833	2018-12-07	201908	P2_4-P2_5	8	30.92	5.83	51.26	180	1585	89.7881	ObeWxz1833	0	1	0	0	0	8.55	220	980.7	985.4	983.05	3.7	1.1	29.7	0.26	28	91.58	15	1	0.533413	11.6972	5.2963	116.519	95.6387	2.20553	19.392	89.7881
ObeWxz1833	2018-12-07	201909	P2_4-P2_5	9	30	4.88	50.23	146	1507	91.145	ObeWxz1833	0	1	0	0	0	8.55	220	980.7	985.4	983.05	3.7	1.1	29.7	0.26	28	91.58	15	1	0.533413	11.6972	5.2963	116.519	95.6387	1.84614	19.0024	91.145
ObeWxz1833	2018-12-07	201910	P2_4-P2_5	10	28.98	4.13	61.39	120	1779	93.6966	ObeWxz1833	0	1	0	0	0	8.55	220	980.7	985.4	983.05	3.7	1.1	29.7	0.26	28	91.58	15	1	0.533413	11.6972	5.2963	116.519	95.6387	1.56241	23.2243	93.6966
ObeWxz1833	2018-12-07	201911	P2_4-P2_5	11	30	6.42	77.11	193	2313	92.3141	ObeWxz1833	0	1	0	0	0	8.55	220	980.7	985.4	983.05	3.7	1.1	29.7	0.26	28	91.58	15	1	0.533413	11.6972	5.2963	116.519	95.6387	2.42873	29.1712	92.3141
ObeWxz1833	2018-12-07	201912	P2_4-P2_5	12	31	5.1	65.71	158	2037	92.7976	ObeWxz1833	0	1	0	0	0	8.55	220	980.7	985.4	983.05	3.7	1.1	29.7	0.26	28	91.58	15	1	0.533413	11.6972	5.2963	116.519	95.6387	1.92937	24.8585	92.7976
ObeWxz1833	2018-12-07	201901	P2_10	1	30.88	9.38	103.95	290	3210	91.7233	ObeWxz1833	0	1	0	0	0	8.55	220	996.8	1002.4	999.6	4.6	1.2	29	0.23	32	91.58	15	1	0.514762	11.2883	5.11111	112.444	95.6387	3.42444	37.95	91.7233
ObeWxz1833	2018-12-07	201902	P2_10	2	27.96	11.33	113.32	317	3168	90.9105	ObeWxz1833	0	1	0	0	0	8.55	220	996.8	1002.4	999.6	4.6	1.2	29	0.23	32	91.58	15	1	0.514762	11.2883	5.11111	112.444	95.6387	4.13635	41.3708	90.9105
ObeWxz1833	2018-12-07	201903	P2_10	3	30.9	10.83	109.96	335	3397	91.034	ObeWxz1833	0	1	0	0	0	8.55	220	996.8	1002.4	999.6	4.6	1.2	29	0.23	32	91.58	15	1	0.514762	11.2883	5.11111	112.444	95.6387	3.95381	40.1441	91.034
ObeWxz1833	2018-12-07	201904	P2_10	4	29.73	8.34	76.56	248	2276	90.1767	ObeWxz1833	0	1	0	0	0	8.55	220	996.8	1002.4	999.6	4.6	1.2	29	0.23	32	91.58	15	1	0.514762	11.2883	5.11111	112.444	95.6387	3.04476	27.9505	90.1767
ObeWxz1833	2018-12-07	201905	P2_10	5	30.75	6.34	64.41	195	1981	91.0389	ObeWxz1833	0	1	0	0	0	8.55	220	996.8	1002.4	999.6	4.6	1.2	29	0.23	32	91.58	15	1	0.514762	11.2883	5.11111	112.444	95.6387	2.3146	23.5148	91.0389
ObeWxz1833	2018-12-07	201906	P2_10	6	29.48	5.65	52.97	167	1562	90.3617	ObeWxz1833	0	1	0	0	0	8.55	220	996.8	1002.4	999.6	4.6	1.2	29	0.23	32	91.58	15	1	0.514762	11.2883	5.11111	112.444	95.6387	2.0627	19.3383	90.3617
ObeWxz1833	2018-12-07	201907	P2_10	7	30.9	6.39	49.53	197	1530	88.573	ObeWxz1833	0	1	0	0	0	8.55	220	996.8	1002.4	999.6	4.6	1.2	29	0.23	32	91.58	15	1	0.514762	11.2883	5.11111	112.444	95.6387	2.33286	18.0824	88.573
ObeWxz1833	2018-12-07	201908	P2_10	8	30.92	5.83	51.26	180	1585	89.7881	ObeWxz1833	0	1	0	0	0	8.55	220	996.8	1002.4	999.6	4.6	1.2	29	0.23	32	91.58	15	1	0.514762	11.2883	5.11111	112.444	95.6387	2.12841	18.714	89.7881
ObeWxz1833	2018-12-07	201909	P2_10	9	30	4.88	50.23	146	1507	91.145	ObeWxz1833	0	1	0	0	0	8.55	220	996.8	1002.4	999.6	4.6	1.2	29	0.23	32	91.58	15	1	0.514762	11.2883	5.11111	112.444	95.6387	1.78159	18.3379	91.145
ObeWxz1833	2018-12-07	201910	P2_10	10	28.98	4.13	61.39	120	1779	93.6966	ObeWxz1833	0	1	0	0	0	8.55	220	996.8	1002.4	999.6	4.6	1.2	29	0.23	32	91.58	15	1	0.514762	11.2883	5.11111	112.444	95.6387	1.50778	22.4122	93.6966
ObeWxz1833	2018-12-07	201911	P2_10	11	30	6.42	77.11	193	2313	92.3141	ObeWxz1833	0	1	0	0	0	8.55	220	996.8	1002.4	999.6	4.6	1.2	29	0.23	32	91.58	15	1	0.514762	11.2883	5.11111	112.444	95.6387	2.34381	28.1513	92.3141
ObeWxz1833	2018-12-07	201912	P2_10	12	31	5.1	65.71	158	2037	92.7976	ObeWxz1833	0	1	0	0	0	8.55	220	996.8	1002.4	999.6	4.6	1.2	29	0.23	32	91.58	15	1	0.514762	11.2883	5.11111	112.444	95.6387	1.8619	23.9894	92.7976
NGmXcB4383	2018-12-30	201902	S3_3/2-S3_4	1	27.94	2.59	42.71	72	1193	94.2826	NGmXcB4383	0	1	0	0	0	9.51	250	941.3	944.2	942.75	2.8	0.8	28.8	0.09	47	96.95	15	1	0.134561	2.38494	3.91632	70.2929	94.6592	0.260084	4.28887	94.2826
NGmXcB4383	2018-12-30	201903	S3_3/2-S3_4	2	31	2.88	38.58	89	1196	93.0535	NGmXcB4383	0	1	0	0	0	9.51	250	941.3	944.2	942.75	2.8	0.8	28.8	0.09	47	96.95	15	1	0.134561	2.38494	3.91632	70.2929	94.6592	0.289205	3.87414	93.0535
NGmXcB4383	2018-12-30	201904	S3_3/2-S3_4	3	30	3.2	38.41	96	1152	92.3095	NGmXcB4383	0	1	0	0	0	9.51	250	941.3	944.2	942.75	2.8	0.8	28.8	0.09	47	96.95	15	1	0.134561	2.38494	3.91632	70.2929	94.6592	0.321339	3.85707	92.3095
NGmXcB4383	2018-12-30	201905	S3_3/2-S3_4	4	30.87	3.6	31.94	111	986	89.8706	NGmXcB4383	0	1	0	0	0	9.51	250	941.3	944.2	942.75	2.8	0.8	28.8	0.09	47	96.95	15	1	0.134561	2.38494	3.91632	70.2929	94.6592	0.361506	3.20736	89.8706
NGmXcB4383	2018-12-30	201906	S3_3/2-S3_4	5	29.6	4.39	29.26	130	866	86.9539	NGmXcB4383	0	1	0	0	0	9.51	250	941.3	944.2	942.75	2.8	0.8	28.8	0.09	47	96.95	15	1	0.134561	2.38494	3.91632	70.2929	94.6592	0.440837	2.93824	86.9539
NGmXcB4383	2018-12-30	201907	S3_3/2-S3_4	6	30.42	4.75	31.82	144	968	87.0112	NGmXcB4383	0	1	0	0	0	9.51	250	941.3	944.2	942.75	2.8	0.8	28.8	0.09	47	96.95	15	1	0.134561	2.38494	3.91632	70.2929	94.6592	0.476987	3.19531	87.0112
NGmXcB4383	2018-12-30	201908	S3_3/2-S3_4	7	29.38	3.84	28.4	113	834	88.0893	NGmXcB4383	0	1	0	0	0	9.51	250	941.3	944.2	942.75	2.8	0.8	28.8	0.09	47	96.95	15	1	0.134561	2.38494	3.91632	70.2929	94.6592	0.385607	2.85188	88.0893
NGmXcB4383	2018-12-30	201909	S3_3/2-S3_4	8	28.06	3.96	30.8	111	864	88.6076	NGmXcB4383	0	1	0	0	0	9.51	250	941.3	944.2	942.75	2.8	0.8	28.8	0.09	47	96.95	15	1	0.134561	2.38494	3.91632	70.2929	94.6592	0.397657	3.09289	88.6076
NGmXcB4383	2018-12-30	201910	S3_3/2-S3_4	9	30.69	3.79	25.18	116	773	86.9175	NGmXcB4383	0	1	0	0	0	9.51	250	941.3	944.2	942.75	2.8	0.8	28.8	0.09	47	96.95	15	1	0.134561	2.38494	3.91632	70.2929	94.6592	0.380586	2.52854	86.9175
NGmXcB4383	2018-12-30	201911	S3_3/2-S3_4	10	29.96	3.54	20.22	106	606	85.101	NGmXcB4383	0	1	0	0	0	9.51	250	941.3	944.2	942.75	2.8	0.8	28.8	0.09	47	96.95	15	1	0.134561	2.38494	3.91632	70.2929	94.6592	0.355481	2.03046	85.101
NGmXcB4383	2018-12-30	201912	S3_3/2-S3_4	11	30.77	2.97	16.29	92	501	84.5794	NGmXcB4383	0	1	0	0	0	9.51	250	941.3	944.2	942.75	2.8	0.8	28.8	0.09	47	96.95	15	1	0.134561	2.38494	3.91632	70.2929	94.6592	0.298243	1.63582	84.5794
NGmXcB4383	2018-12-30	201902	P2_1-P2_2-3	1	27.94	2.59	42.71	72	1193	94.2826	NGmXcB4383	0	1	0	0	0	9.51	250	1003.8	1009.2	1006.5	4.2	3.1	29.1	0.15	42	116.1	18	1	0.869038	15.4027	25.2929	453.975	94.6592	1.67971	27.699	94.2826
NGmXcB4383	2018-12-30	201903	P2_1-P2_2-3	2	31	2.88	38.58	89	1196	93.0535	NGmXcB4383	0	1	0	0	0	9.51	250	1003.8	1009.2	1006.5	4.2	3.1	29.1	0.15	42	116.1	18	1	0.869038	15.4027	25.2929	453.975	94.6592	1.86778	25.0205	93.0535
NGmXcB4383	2018-12-30	201904	P2_1-P2_2-3	3	30	3.2	38.41	96	1152	92.3095	NGmXcB4383	0	1	0	0	0	9.51	250	1003.8	1009.2	1006.5	4.2	3.1	29.1	0.15	42	116.1	18	1	0.869038	15.4027	25.2929	453.975	94.6592	2.07531	24.9103	92.3095
NGmXcB4383	2018-12-30	201905	P2_1-P2_2-3	4	30.87	3.6	31.94	111	986	89.8706	NGmXcB4383	0	1	0	0	0	9.51	250	1003.8	1009.2	1006.5	4.2	3.1	29.1	0.15	42	116.1	18	1	0.869038	15.4027	25.2929	453.975	94.6592	2.33473	20.7142	89.8706
NGmXcB4383	2018-12-30	201906	P2_1-P2_2-3	5	29.6	4.39	29.26	130	866	86.9539	NGmXcB4383	0	1	0	0	0	9.51	250	1003.8	1009.2	1006.5	4.2	3.1	29.1	0.15	42	116.1	18	1	0.869038	15.4027	25.2929	453.975	94.6592	2.84707	18.9762	86.9539
NGmXcB4383	2018-12-30	201907	P2_1-P2_2-3	6	30.42	4.75	31.82	144	968	87.0112	NGmXcB4383	0	1	0	0	0	9.51	250	1003.8	1009.2	1006.5	4.2	3.1	29.1	0.15	42	116.1	18	1	0.869038	15.4027	25.2929	453.975	94.6592	3.08054	20.6364	87.0112
NGmXcB4383	2018-12-30	201908	P2_1-P2_2-3	7	29.38	3.84	28.4	113	834	88.0893	NGmXcB4383	0	1	0	0	0	9.51	250	1003.8	1009.2	1006.5	4.2	3.1	29.1	0.15	42	116.1	18	1	0.869038	15.4027	25.2929	453.975	94.6592	2.49038	18.4184	88.0893
NGmXcB4383	2018-12-30	201909	P2_1-P2_2-3	8	28.06	3.96	30.8	111	864	88.6076	NGmXcB4383	0	1	0	0	0	9.51	250	1003.8	1009.2	1006.5	4.2	3.1	29.1	0.15	42	116.1	18	1	0.869038	15.4027	25.2929	453.975	94.6592	2.5682	19.9749	88.6076
NGmXcB4383	2018-12-30	201910	P2_1-P2_2-3	9	30.69	3.79	25.18	116	773	86.9175	NGmXcB4383	0	1	0	0	0	9.51	250	1003.8	1009.2	1006.5	4.2	3.1	29.1	0.15	42	116.1	18	1	0.869038	15.4027	25.2929	453.975	94.6592	2.45795	16.3301	86.9175
NGmXcB4383	2018-12-30	201911	P2_1-P2_2-3	10	29.96	3.54	20.22	106	606	85.101	NGmXcB4383	0	1	0	0	0	9.51	250	1003.8	1009.2	1006.5	4.2	3.1	29.1	0.15	42	116.1	18	1	0.869038	15.4027	25.2929	453.975	94.6592	2.29582	13.1134	85.101
NGmXcB4383	2018-12-30	201912	P2_1-P2_2-3	11	30.77	2.97	16.29	92	501	84.5794	NGmXcB4383	0	1	0	0	0	9.51	250	1003.8	1009.2	1006.5	4.2	3.1	29.1	0.15	42	116.1	18	1	0.869038	15.4027	25.2929	453.975	94.6592	1.92615	10.5646	84.5794
NGmXcB4383	2018-12-30	201902	P2_8-P2_9	1	27.94	2.59	42.71	72	1193	94.2826	NGmXcB4383	0	1	0	0	0	9.51	250	1021.4	1027.7	1024.55	1.8	0.9	28.8	0.2	51	103.25	16	1	0.336402	5.96234	9.79079	175.732	94.6592	0.650209	10.7222	94.2826
NGmXcB4383	2018-12-30	201903	P2_8-P2_9	2	31	2.88	38.58	89	1196	93.0535	NGmXcB4383	0	1	0	0	0	9.51	250	1021.4	1027.7	1024.55	1.8	0.9	28.8	0.2	51	103.25	16	1	0.336402	5.96234	9.79079	175.732	94.6592	0.723013	9.68536	93.0535
NGmXcB4383	2018-12-30	201904	P2_8-P2_9	3	30	3.2	38.41	96	1152	92.3095	NGmXcB4383	0	1	0	0	0	9.51	250	1021.4	1027.7	1024.55	1.8	0.9	28.8	0.2	51	103.25	16	1	0.336402	5.96234	9.79079	175.732	94.6592	0.803347	9.64268	92.3095
NGmXcB4383	2018-12-30	201905	P2_8-P2_9	4	30.87	3.6	31.94	111	986	89.8706	NGmXcB4383	0	1	0	0	0	9.51	250	1021.4	1027.7	1024.55	1.8	0.9	28.8	0.2	51	103.25	16	1	0.336402	5.96234	9.79079	175.732	94.6592	0.903766	8.01841	89.8706
NGmXcB4383	2018-12-30	201906	P2_8-P2_9	5	29.6	4.39	29.26	130	866	86.9539	NGmXcB4383	0	1	0	0	0	9.51	250	1021.4	1027.7	1024.55	1.8	0.9	28.8	0.2	51	103.25	16	1	0.336402	5.96234	9.79079	175.732	94.6592	1.10209	7.34561	86.9539
NGmXcB4383	2018-12-30	201907	P2_8-P2_9	6	30.42	4.75	31.82	144	968	87.0112	NGmXcB4383	0	1	0	0	0	9.51	250	1021.4	1027.7	1024.55	1.8	0.9	28.8	0.2	51	103.25	16	1	0.336402	5.96234	9.79079	175.732	94.6592	1.19247	7.98828	87.0112
NGmXcB4383	2018-12-30	201908	P2_8-P2_9	7	29.38	3.84	28.4	113	834	88.0893	NGmXcB4383	0	1	0	0	0	9.51	250	1021.4	1027.7	1024.55	1.8	0.9	28.8	0.2	51	103.25	16	1	0.336402	5.96234	9.79079	175.732	94.6592	0.964017	7.12971	88.0893
NGmXcB4383	2018-12-30	201909	P2_8-P2_9	8	28.06	3.96	30.8	111	864	88.6076	NGmXcB4383	0	1	0	0	0	9.51	250	1021.4	1027.7	1024.55	1.8	0.9	28.8	0.2	51	103.25	16	1	0.336402	5.96234	9.79079	175.732	94.6592	0.994142	7.73222	88.6076
NGmXcB4383	2018-12-30	201910	P2_8-P2_9	9	30.69	3.79	25.18	116	773	86.9175	NGmXcB4383	0	1	0	0	0	9.51	250	1021.4	1027.7	1024.55	1.8	0.9	28.8	0.2	51	103.25	16	1	0.336402	5.96234	9.79079	175.732	94.6592	0.951464	6.32134	86.9175
NGmXcB4383	2018-12-30	201911	P2_8-P2_9	10	29.96	3.54	20.22	106	606	85.101	NGmXcB4383	0	1	0	0	0	9.51	250	1021.4	1027.7	1024.55	1.8	0.9	28.8	0.2	51	103.25	16	1	0.336402	5.96234	9.79079	175.732	94.6592	0.888703	5.07615	85.101
NGmXcB4383	2018-12-30	201912	P2_8-P2_9	11	30.77	2.97	16.29	92	501	84.5794	NGmXcB4383	0	1	0	0	0	9.51	250	1021.4	1027.7	1024.55	1.8	0.9	28.8	0.2	51	103.25	16	1	0.336402	5.96234	9.79079	175.732	94.6592	0.745607	4.08954	84.5794
DQB7p2x6lK	2019-02-27	201903	G2_18	1	26	13.31	77.4	346	2012	85.3269	DQB7p2x6lK	0	1	0	0	0	8.52	150	1112.6	1114.3	1113.45	1	0.6	26.4	0.153	21	85.96	14	1	0.164167	1.37657	5.10743	42.6227	89.3449	0.809285	4.70613	85.3269
DQB7p2x6lK	2019-02-27	201904	G2_18	2	30	13.1	68.92	393	2068	84.0283	DQB7p2x6lK	0	1	0	0	0	8.52	150	1112.6	1114.3	1113.45	1	0.6	26.4	0.153	21	85.96	14	1	0.164167	1.37657	5.10743	42.6227	89.3449	0.796516	4.19053	84.0283
DQB7p2x6lK	2019-02-27	201905	G2_18	3	30.98	10.85	63.45	336	1966	85.397	DQB7p2x6lK	0	1	0	0	0	8.52	150	1112.6	1114.3	1113.45	1	0.6	26.4	0.153	21	85.96	14	1	0.164167	1.37657	5.10743	42.6227	89.3449	0.65971	3.85793	85.397
DQB7p2x6lK	2019-02-27	201906	G2_18	4	29.48	10.35	61.43	305	1811	85.5809	DQB7p2x6lK	0	1	0	0	0	8.52	150	1112.6	1114.3	1113.45	1	0.6	26.4	0.153	21	85.96	14	1	0.164167	1.37657	5.10743	42.6227	89.3449	0.629309	3.73511	85.5809
DQB7p2x6lK	2019-02-27	201907	G2_18	5	31	13.29	73.64	412	2283	84.7118	DQB7p2x6lK	0	1	0	0	0	8.52	150	1112.6	1114.3	1113.45	1	0.6	26.4	0.153	21	85.96	14	1	0.164167	1.37657	5.10743	42.6227	89.3449	0.808069	4.47751	84.7118
DQB7p2x6lK	2019-02-27	201908	G2_18	6	30.98	12.47	67.76	386	2099	84.4572	DQB7p2x6lK	0	1	0	0	0	8.52	150	1112.6	1114.3	1113.45	1	0.6	26.4	0.153	21	85.96	14	1	0.164167	1.37657	5.10743	42.6227	89.3449	0.75821	4.11999	84.4572
DQB7p2x6lK	2019-02-27	201909	G2_18	7	30	12.52	74.91	376	2247	85.68	DQB7p2x6lK	0	1	0	0	0	8.52	150	1112.6	1114.3	1113.45	1	0.6	26.4	0.153	21	85.96	14	1	0.164167	1.37657	5.10743	42.6227	89.3449	0.76125	4.55473	85.68
DQB7p2x6lK	2019-02-27	201910	G2_18	8	30.25	13.65	78.52	413	2375	85.1904	DQB7p2x6lK	0	1	0	0	0	8.52	150	1112.6	1114.3	1113.45	1	0.6	26.4	0.153	21	85.96	14	1	0.164167	1.37657	5.10743	42.6227	89.3449	0.829958	4.77423	85.1904
DQB7p2x6lK	2019-02-27	201911	G2_18	9	29.63	14.2	61.9	421	1834	81.3403	DQB7p2x6lK	0	1	0	0	0	8.52	150	1112.6	1114.3	1113.45	1	0.6	26.4	0.153	21	85.96	14	1	0.164167	1.37657	5.10743	42.6227	89.3449	0.863399	3.76369	81.3403
DQB7p2x6lK	2019-02-27	201912	G2_18	10	27.88	9.64	72.3	269	2015	88.2353	DQB7p2x6lK	0	1	0	0	0	8.52	150	1112.6	1114.3	1113.45	1	0.6	26.4	0.153	21	85.96	14	1	0.164167	1.37657	5.10743	42.6227	89.3449	0.586139	4.39604	88.2353
DQB7p2x6lK	2019-02-27	202001	G2_18	11	30.96	8.42	64.39	261	1993	88.4357	DQB7p2x6lK	0	1	0	0	0	8.52	150	1112.6	1114.3	1113.45	1	0.6	26.4	0.153	21	85.96	14	1	0.164167	1.37657	5.10743	42.6227	89.3449	0.511959	3.91509	88.4357
DQB7p2x6lK	2019-02-27	202002	G2_18	12	28.88	7.09	73.81	205	2131	91.2361	DQB7p2x6lK	0	1	0	0	0	8.52	150	1112.6	1114.3	1113.45	1	0.6	26.4	0.153	21	85.96	14	1	0.164167	1.37657	5.10743	42.6227	89.3449	0.431092	4.48785	91.2361
JIbHKA1552	2019-03-01	201904	SⅡ*11-SⅡ*13	1	29.94	6.34	30.11	190	902	82.6063	JIbHKA1552	0	1	0	0	0	6.17	200	741.8	747.4	744.6	2.6	0.2	27.5	0.047	32	95.85	15	1	0.157822	0.928174	2.03905	12.0304	85.4675	0.258551	1.22791	82.6063
JIbHKA1552	2019-03-01	201905	SⅡ*11-SⅡ*13	2	30.92	5.67	25.53	175	789	81.8269	JIbHKA1552	0	1	0	0	0	6.17	200	741.8	747.4	744.6	2.6	0.2	27.5	0.047	32	95.85	15	1	0.157822	0.928174	2.03905	12.0304	85.4675	0.231228	1.04114	81.8269
JIbHKA1552	2019-03-01	201906	SⅡ*11-SⅡ*13	3	29.88	5.35	23.17	160	692	81.2412	JIbHKA1552	0	1	0	0	0	6.17	200	741.8	747.4	744.6	2.6	0.2	27.5	0.047	32	95.85	15	1	0.157822	0.928174	2.03905	12.0304	85.4675	0.218178	0.944894	81.2412
JIbHKA1552	2019-03-01	201907	SⅡ*11-SⅡ*13	4	30.69	5.57	24.74	171	759	81.6232	JIbHKA1552	0	1	0	0	0	6.17	200	741.8	747.4	744.6	2.6	0.2	27.5	0.047	32	95.85	15	1	0.157822	0.928174	2.03905	12.0304	85.4675	0.22715	1.00892	81.6232
JIbHKA1552	2019-03-01	201908	SⅡ*11-SⅡ*13	5	30.85	4.94	23.6	152	728	82.691	JIbHKA1552	0	1	0	0	0	6.17	200	741.8	747.4	744.6	2.6	0.2	27.5	0.047	32	95.85	15	1	0.157822	0.928174	2.03905	12.0304	85.4675	0.201458	0.96243	82.691
JIbHKA1552	2019-03-01	201909	SⅡ*11-SⅡ*13	6	29.85	4.48	24.08	134	719	84.3137	JIbHKA1552	0	1	0	0	0	6.17	200	741.8	747.4	744.6	2.6	0.2	27.5	0.047	32	95.85	15	1	0.157822	0.928174	2.03905	12.0304	85.4675	0.182698	0.982004	84.3137
JIbHKA1552	2019-03-01	201910	SⅡ*11-SⅡ*13	7	30.94	4.66	23.71	144	733	83.5742	JIbHKA1552	0	1	0	0	0	6.17	200	741.8	747.4	744.6	2.6	0.2	27.5	0.047	32	95.85	15	1	0.157822	0.928174	2.03905	12.0304	85.4675	0.190039	0.966915	83.5742
JIbHKA1552	2019-03-01	201911	SⅡ*11-SⅡ*13	8	29.77	4.53	25.35	135	755	84.8394	JIbHKA1552	0	1	0	0	0	6.17	200	741.8	747.4	744.6	2.6	0.2	27.5	0.047	32	95.85	15	1	0.157822	0.928174	2.03905	12.0304	85.4675	0.184738	1.0338	84.8394
JIbHKA1552	2019-03-01	201912	SⅡ*11-SⅡ*13	9	30.9	4.77	29.02	147	897	85.8834	JIbHKA1552	0	1	0	0	0	6.17	200	741.8	747.4	744.6	2.6	0.2	27.5	0.047	32	95.85	15	1	0.157822	0.928174	2.03905	12.0304	85.4675	0.194525	1.18346	85.8834
JIbHKA1552	2019-03-01	202001	SⅡ*11-SⅡ*13	10	30.9	4.79	30.76	148	950	86.526	JIbHKA1552	0	1	0	0	0	6.17	200	741.8	747.4	744.6	2.6	0.2	27.5	0.047	32	95.85	15	1	0.157822	0.928174	2.03905	12.0304	85.4675	0.195341	1.25442	86.526
JIbHKA1552	2019-03-01	202002	SⅡ*11-SⅡ*13	11	28.96	4.99	31.95	145	925	86.4916	JIbHKA1552	0	1	0	0	0	6.17	200	741.8	747.4	744.6	2.6	0.2	27.5	0.047	32	95.85	15	1	0.157822	0.928174	2.03905	12.0304	85.4675	0.203497	1.30295	86.4916
JIbHKA1552	2019-03-01	202003	SⅡ*11-SⅡ*13	12	30.98	4.54	28.65	141	887	86.3212	JIbHKA1552	0	1	0	0	0	6.17	200	741.8	747.4	744.6	2.6	0.2	27.5	0.047	32	95.85	15	1	0.157822	0.928174	2.03905	12.0304	85.4675	0.185145	1.16837	86.3212
JIbHKA1552	2019-03-01	201904	SⅡ13-SⅡ*15+16	1	29.94	6.34	30.11	190	902	82.6063	JIbHKA1552	0	1	0	0	0	6.17	200	749.4	757.8	753.6	2.8	1.3	28.3	0.081	32	95.85	15	1	1.76794	10.3975	22.8416	134.766	85.4675	2.89632	13.7552	82.6063
JIbHKA1552	2019-03-01	201905	SⅡ13-SⅡ*15+16	2	30.92	5.67	25.53	175	789	81.8269	JIbHKA1552	0	1	0	0	0	6.17	200	749.4	757.8	753.6	2.8	1.3	28.3	0.081	32	95.85	15	1	1.76794	10.3975	22.8416	134.766	85.4675	2.59024	11.6629	81.8269
JIbHKA1552	2019-03-01	201906	SⅡ13-SⅡ*15+16	3	29.88	5.35	23.17	160	692	81.2412	JIbHKA1552	0	1	0	0	0	6.17	200	749.4	757.8	753.6	2.8	1.3	28.3	0.081	32	95.85	15	1	1.76794	10.3975	22.8416	134.766	85.4675	2.44406	10.5848	81.2412
JIbHKA1552	2019-03-01	201907	SⅡ13-SⅡ*15+16	4	30.69	5.57	24.74	171	759	81.6232	JIbHKA1552	0	1	0	0	0	6.17	200	749.4	757.8	753.6	2.8	1.3	28.3	0.081	32	95.85	15	1	1.76794	10.3975	22.8416	134.766	85.4675	2.54456	11.302	81.6232
JIbHKA1552	2019-03-01	201908	SⅡ13-SⅡ*15+16	5	30.85	4.94	23.6	152	728	82.691	JIbHKA1552	0	1	0	0	0	6.17	200	749.4	757.8	753.6	2.8	1.3	28.3	0.081	32	95.85	15	1	1.76794	10.3975	22.8416	134.766	85.4675	2.25675	10.7813	82.691
JIbHKA1552	2019-03-01	201909	SⅡ13-SⅡ*15+16	6	29.85	4.48	24.08	134	719	84.3137	JIbHKA1552	0	1	0	0	0	6.17	200	749.4	757.8	753.6	2.8	1.3	28.3	0.081	32	95.85	15	1	1.76794	10.3975	22.8416	134.766	85.4675	2.04661	11.0005	84.3137
JIbHKA1552	2019-03-01	201910	SⅡ13-SⅡ*15+16	7	30.94	4.66	23.71	144	733	83.5742	JIbHKA1552	0	1	0	0	0	6.17	200	749.4	757.8	753.6	2.8	1.3	28.3	0.081	32	95.85	15	1	1.76794	10.3975	22.8416	134.766	85.4675	2.12884	10.8315	83.5742
JIbHKA1552	2019-03-01	201911	SⅡ13-SⅡ*15+16	8	29.77	4.53	25.35	135	755	84.8394	JIbHKA1552	0	1	0	0	0	6.17	200	749.4	757.8	753.6	2.8	1.3	28.3	0.081	32	95.85	15	1	1.76794	10.3975	22.8416	134.766	85.4675	2.06945	11.5807	84.8394
JIbHKA1552	2019-03-01	201912	SⅡ13-SⅡ*15+16	9	30.9	4.77	29.02	147	897	85.8834	JIbHKA1552	0	1	0	0	0	6.17	200	749.4	757.8	753.6	2.8	1.3	28.3	0.081	32	95.85	15	1	1.76794	10.3975	22.8416	134.766	85.4675	2.17909	13.2573	85.8834
JIbHKA1552	2019-03-01	202001	SⅡ13-SⅡ*15+16	10	30.9	4.79	30.76	148	950	86.526	JIbHKA1552	0	1	0	0	0	6.17	200	749.4	757.8	753.6	2.8	1.3	28.3	0.081	32	95.85	15	1	1.76794	10.3975	22.8416	134.766	85.4675	2.18823	14.0522	86.526
JIbHKA1552	2019-03-01	202002	SⅡ13-SⅡ*15+16	11	28.96	4.99	31.95	145	925	86.4916	JIbHKA1552	0	1	0	0	0	6.17	200	749.4	757.8	753.6	2.8	1.3	28.3	0.081	32	95.85	15	1	1.76794	10.3975	22.8416	134.766	85.4675	2.2796	14.5958	86.4916
JIbHKA1552	2019-03-01	202003	SⅡ13-SⅡ*15+16	12	30.98	4.54	28.65	141	887	86.3212	JIbHKA1552	0	1	0	0	0	6.17	200	749.4	757.8	753.6	2.8	1.3	28.3	0.081	32	95.85	15	1	1.76794	10.3975	22.8416	134.766	85.4675	2.07402	13.0883	86.3212
JIbHKA1552	2019-03-01	201904	PⅡ1	1	29.94	6.34	30.11	190	902	82.6063	JIbHKA1552	0	1	0	0	0	6.17	200	837.2	838.2	837.7	1.7	0.3	28.1	0.052	45	90.44	14	1	0.261918	1.54037	3.38395	19.9653	85.4675	0.429085	2.03781	82.6063
JIbHKA1552	2019-03-01	201905	PⅡ1	2	30.92	5.67	25.53	175	789	81.8269	JIbHKA1552	0	1	0	0	0	6.17	200	837.2	838.2	837.7	1.7	0.3	28.1	0.052	45	90.44	14	1	0.261918	1.54037	3.38395	19.9653	85.4675	0.38374	1.72784	81.8269
JIbHKA1552	2019-03-01	201906	PⅡ1	3	29.88	5.35	23.17	160	692	81.2412	JIbHKA1552	0	1	0	0	0	6.17	200	837.2	838.2	837.7	1.7	0.3	28.1	0.052	45	90.44	14	1	0.261918	1.54037	3.38395	19.9653	85.4675	0.362082	1.56812	81.2412
JIbHKA1552	2019-03-01	201907	PⅡ1	4	30.69	5.57	24.74	171	759	81.6232	JIbHKA1552	0	1	0	0	0	6.17	200	837.2	838.2	837.7	1.7	0.3	28.1	0.052	45	90.44	14	1	0.261918	1.54037	3.38395	19.9653	85.4675	0.376972	1.67438	81.6232
JIbHKA1552	2019-03-01	201908	PⅡ1	5	30.85	4.94	23.6	152	728	82.691	JIbHKA1552	0	1	0	0	0	6.17	200	837.2	838.2	837.7	1.7	0.3	28.1	0.052	45	90.44	14	1	0.261918	1.54037	3.38395	19.9653	85.4675	0.334334	1.59722	82.691
JIbHKA1552	2019-03-01	201909	PⅡ1	6	29.85	4.48	24.08	134	719	84.3137	JIbHKA1552	0	1	0	0	0	6.17	200	837.2	838.2	837.7	1.7	0.3	28.1	0.052	45	90.44	14	1	0.261918	1.54037	3.38395	19.9653	85.4675	0.303202	1.62971	84.3137
JIbHKA1552	2019-03-01	201910	PⅡ1	7	30.94	4.66	23.71	144	733	83.5742	JIbHKA1552	0	1	0	0	0	6.17	200	837.2	838.2	837.7	1.7	0.3	28.1	0.052	45	90.44	14	1	0.261918	1.54037	3.38395	19.9653	85.4675	0.315384	1.60467	83.5742
JIbHKA1552	2019-03-01	201911	PⅡ1	8	29.77	4.53	25.35	135	755	84.8394	JIbHKA1552	0	1	0	0	0	6.17	200	837.2	838.2	837.7	1.7	0.3	28.1	0.052	45	90.44	14	1	0.261918	1.54037	3.38395	19.9653	85.4675	0.306586	1.71566	84.8394
JIbHKA1552	2019-03-01	201912	PⅡ1	9	30.9	4.77	29.02	147	897	85.8834	JIbHKA1552	0	1	0	0	0	6.17	200	837.2	838.2	837.7	1.7	0.3	28.1	0.052	45	90.44	14	1	0.261918	1.54037	3.38395	19.9653	85.4675	0.322829	1.96404	85.8834
JIbHKA1552	2019-03-01	202001	PⅡ1	10	30.9	4.79	30.76	148	950	86.526	JIbHKA1552	0	1	0	0	0	6.17	200	837.2	838.2	837.7	1.7	0.3	28.1	0.052	45	90.44	14	1	0.261918	1.54037	3.38395	19.9653	85.4675	0.324182	2.0818	86.526
JIbHKA1552	2019-03-01	202002	PⅡ1	11	28.96	4.99	31.95	145	925	86.4916	JIbHKA1552	0	1	0	0	0	6.17	200	837.2	838.2	837.7	1.7	0.3	28.1	0.052	45	90.44	14	1	0.261918	1.54037	3.38395	19.9653	85.4675	0.337718	2.16234	86.4916
JIbHKA1552	2019-03-01	202003	PⅡ1	12	30.98	4.54	28.65	141	887	86.3212	JIbHKA1552	0	1	0	0	0	6.17	200	837.2	838.2	837.7	1.7	0.3	28.1	0.052	45	90.44	14	1	0.261918	1.54037	3.38395	19.9653	85.4675	0.307262	1.939	86.3212
JIbHKA1552	2019-03-01	201904	PⅡ*5\2-PⅡ7	1	29.94	6.34	30.11	190	902	82.6063	JIbHKA1552	0	1	0	0	0	6.17	200	849.7	855.6	852.65	1.2	0.6	28.8	0.167	31	96.4	15	1	1.68232	9.89393	21.7354	128.239	85.4675	2.75604	13.089	82.6063
JIbHKA1552	2019-03-01	201905	PⅡ*5\2-PⅡ7	2	30.92	5.67	25.53	175	789	81.8269	JIbHKA1552	0	1	0	0	0	6.17	200	849.7	855.6	852.65	1.2	0.6	28.8	0.167	31	96.4	15	1	1.68232	9.89393	21.7354	128.239	85.4675	2.46479	11.0981	81.8269
JIbHKA1552	2019-03-01	201906	PⅡ*5\2-PⅡ7	3	29.88	5.35	23.17	160	692	81.2412	JIbHKA1552	0	1	0	0	0	6.17	200	849.7	855.6	852.65	1.2	0.6	28.8	0.167	31	96.4	15	1	1.68232	9.89393	21.7354	128.239	85.4675	2.32568	10.0722	81.2412
JIbHKA1552	2019-03-01	201907	PⅡ*5\2-PⅡ7	4	30.69	5.57	24.74	171	759	81.6232	JIbHKA1552	0	1	0	0	0	6.17	200	849.7	855.6	852.65	1.2	0.6	28.8	0.167	31	96.4	15	1	1.68232	9.89393	21.7354	128.239	85.4675	2.42132	10.7547	81.6232
JIbHKA1552	2019-03-01	201908	PⅡ*5\2-PⅡ7	5	30.85	4.94	23.6	152	728	82.691	JIbHKA1552	0	1	0	0	0	6.17	200	849.7	855.6	852.65	1.2	0.6	28.8	0.167	31	96.4	15	1	1.68232	9.89393	21.7354	128.239	85.4675	2.14745	10.2591	82.691
JIbHKA1552	2019-03-01	201909	PⅡ*5\2-PⅡ7	6	29.85	4.48	24.08	134	719	84.3137	JIbHKA1552	0	1	0	0	0	6.17	200	849.7	855.6	852.65	1.2	0.6	28.8	0.167	31	96.4	15	1	1.68232	9.89393	21.7354	128.239	85.4675	1.94749	10.4677	84.3137
JIbHKA1552	2019-03-01	201910	PⅡ*5\2-PⅡ7	7	30.94	4.66	23.71	144	733	83.5742	JIbHKA1552	0	1	0	0	0	6.17	200	849.7	855.6	852.65	1.2	0.6	28.8	0.167	31	96.4	15	1	1.68232	9.89393	21.7354	128.239	85.4675	2.02574	10.3069	83.5742
JIbHKA1552	2019-03-01	201911	PⅡ*5\2-PⅡ7	8	29.77	4.53	25.35	135	755	84.8394	JIbHKA1552	0	1	0	0	0	6.17	200	849.7	855.6	852.65	1.2	0.6	28.8	0.167	31	96.4	15	1	1.68232	9.89393	21.7354	128.239	85.4675	1.96922	11.0198	84.8394
JIbHKA1552	2019-03-01	201912	PⅡ*5\2-PⅡ7	9	30.9	4.77	29.02	147	897	85.8834	JIbHKA1552	0	1	0	0	0	6.17	200	849.7	855.6	852.65	1.2	0.6	28.8	0.167	31	96.4	15	1	1.68232	9.89393	21.7354	128.239	85.4675	2.07355	12.6152	85.8834
JIbHKA1552	2019-03-01	202001	PⅡ*5\2-PⅡ7	10	30.9	4.79	30.76	148	950	86.526	JIbHKA1552	0	1	0	0	0	6.17	200	849.7	855.6	852.65	1.2	0.6	28.8	0.167	31	96.4	15	1	1.68232	9.89393	21.7354	128.239	85.4675	2.08225	13.3716	86.526
JIbHKA1552	2019-03-01	202002	PⅡ*5\2-PⅡ7	11	28.96	4.99	31.95	145	925	86.4916	JIbHKA1552	0	1	0	0	0	6.17	200	849.7	855.6	852.65	1.2	0.6	28.8	0.167	31	96.4	15	1	1.68232	9.89393	21.7354	128.239	85.4675	2.16919	13.8889	86.4916
JIbHKA1552	2019-03-01	202003	PⅡ*5\2-PⅡ7	12	30.98	4.54	28.65	141	887	86.3212	JIbHKA1552	0	1	0	0	0	6.17	200	849.7	855.6	852.65	1.2	0.6	28.8	0.167	31	96.4	15	1	1.68232	9.89393	21.7354	128.239	85.4675	1.97357	12.4544	86.3212
DQouwPDodi	2019-03-25	201904	G3_*15_2-G3_*16	1	27.22	1.63	137.98	45	3895	98.8325	DQouwPDodi	0	1	0	0	0	9.11	106	1127.1	1130.3	1128.7	1.9	0.2	25.7	0.084	31	49.08	7	1	0.0417137	0.519104	1.17235	14.5316	92.562	0.0444401	3.76187	98.8325
DQouwPDodi	2019-03-25	201904	G3_*23-G4_1_2	1	27.22	1.63	137.98	45	3895	98.8325	DQouwPDodi	0	1	0	0	0	9.11	106	1149.3	1156	1152.65	3.8	0.8	26.4	0.153	27	46.79	6.5	1	0.303914	3.78204	8.54138	105.873	92.562	0.323778	27.4079	98.8325
DQouwPDodi	2019-03-25	201904	G4_2-G4_3	1	27.22	1.63	137.98	45	3895	98.8325	DQouwPDodi	0	1	0	0	0	9.11	106	1161.4	1166.3	1163.85	3.8	1.2	27.3	0.234	29	42.36	6	1	0.697215	8.67646	19.5949	242.886	92.562	0.742785	62.877	98.8325
fwahsQ8615	2019-04-18	201905	S1_1-S1_2	1	30.68	3.71	42.24	114	1296	91.926	fwahsQ8615	0	1	0	0	0	8.29	250	860.4	867.4	863.9	3	0.5	30.9	0.14	45	103.05	16	1	0.00280963	0.105161	0.0802752	3.25115	97.3978	0.148911	1.69541	91.926
fwahsQ8615	2019-04-18	201906	S1_1-S1_2	2	29.6	3.29	32.25	97	955	90.7428	fwahsQ8615	0	1	0	0	0	8.29	250	860.4	867.4	863.9	3	0.5	30.9	0.14	45	103.05	16	1	0.00280963	0.105161	0.0802752	3.25115	97.3978	0.132053	1.29444	90.7428
fwahsQ8615	2019-04-18	201907	S1_1-S1_2	3	30.56	2.18	25.09	67	767	92.0059	fwahsQ8615	0	1	0	0	0	8.29	250	860.4	867.4	863.9	3	0.5	30.9	0.14	45	103.05	16	1	0.00280963	0.105161	0.0802752	3.25115	97.3978	0.0875	1.00705	92.0059
fwahsQ8615	2019-04-18	201908	S1_1-S1_2	4	31	2.23	22.47	69	697	90.9717	fwahsQ8615	0	1	0	0	0	8.29	250	860.4	867.4	863.9	3	0.5	30.9	0.14	45	103.05	16	1	0.00280963	0.105161	0.0802752	3.25115	97.3978	0.0895069	0.901892	90.9717
fwahsQ8615	2019-04-18	201909	S1_1-S1_2	5	29.77	2.28	20.43	68	608	89.9604	fwahsQ8615	0	1	0	0	0	8.29	250	860.4	867.4	863.9	3	0.5	30.9	0.14	45	103.05	16	1	0.00280963	0.105161	0.0802752	3.25115	97.3978	0.0915138	0.820011	89.9604
fwahsQ8615	2019-04-18	201910	S1_1-S1_2	6	30.42	2.71	22.67	82	689	89.3223	fwahsQ8615	0	1	0	0	0	8.29	250	860.4	867.4	863.9	3	0.5	30.9	0.14	45	103.05	16	1	0.00280963	0.105161	0.0802752	3.25115	97.3978	0.108773	0.90992	89.3223
fwahsQ8615	2019-04-18	201911	S1_1-S1_2	7	30	2.23	15.73	67	472	87.5835	fwahsQ8615	0	1	0	0	0	8.29	250	860.4	867.4	863.9	3	0.5	30.9	0.14	45	103.05	16	1	0.00280963	0.105161	0.0802752	3.25115	97.3978	0.0895069	0.631365	87.5835
fwahsQ8615	2019-04-18	201912	S1_1-S1_2	8	31	2.07	14.37	64	446	87.4088	fwahsQ8615	0	1	0	0	0	8.29	250	860.4	867.4	863.9	3	0.5	30.9	0.14	45	103.05	16	1	0.00280963	0.105161	0.0802752	3.25115	97.3978	0.0830849	0.576778	87.4088
fwahsQ8615	2019-04-18	202001	S1_1-S1_2	9	31	2.1	16.67	65	517	88.8119	fwahsQ8615	0	1	0	0	0	8.29	250	860.4	867.4	863.9	3	0.5	30.9	0.14	45	103.05	16	1	0.00280963	0.105161	0.0802752	3.25115	97.3978	0.084289	0.669094	88.8119
fwahsQ8615	2019-04-18	202002	S1_1-S1_2	10	29	1.89	23.46	55	680	92.5444	fwahsQ8615	0	1	0	0	0	8.29	250	860.4	867.4	863.9	3	0.5	30.9	0.14	45	103.05	16	1	0.00280963	0.105161	0.0802752	3.25115	97.3978	0.0758601	0.941628	92.5444
fwahsQ8615	2019-04-18	202003	S1_1-S1_2	11	31	2.49	38.58	77	1196	93.9372	fwahsQ8615	0	1	0	0	0	8.29	250	860.4	867.4	863.9	3	0.5	30.9	0.14	45	103.05	16	1	0.00280963	0.105161	0.0802752	3.25115	97.3978	0.0999427	1.54851	93.9372
fwahsQ8615	2019-04-18	202004	S1_1-S1_2	12	29.9	2.71	42.82	81	1280	94.0479	fwahsQ8615	0	1	0	0	0	8.29	250	860.4	867.4	863.9	3	0.5	30.9	0.14	45	103.05	16	1	0.00280963	0.105161	0.0802752	3.25115	97.3978	0.108773	1.71869	94.0479
fwahsQ8615	2019-04-18	201905	S1_3-5-S1_4+5	1	30.68	3.71	42.24	114	1296	91.926	fwahsQ8615	0	1	0	0	0	8.29	250	869.4	876	872.7	5.6	1.8	30.9	0.18	36	103.05	16	1	0.0130046	0.486743	0.37156	15.0482	97.3978	0.689243	7.84734	91.926
fwahsQ8615	2019-04-18	201906	S1_3-5-S1_4+5	2	29.6	3.29	32.25	97	955	90.7428	fwahsQ8615	0	1	0	0	0	8.29	250	869.4	876	872.7	5.6	1.8	30.9	0.18	36	103.05	16	1	0.0130046	0.486743	0.37156	15.0482	97.3978	0.611216	5.9914	90.7428
fwahsQ8615	2019-04-18	201907	S1_3-5-S1_4+5	3	30.56	2.18	25.09	67	767	92.0059	fwahsQ8615	0	1	0	0	0	8.29	250	869.4	876	872.7	5.6	1.8	30.9	0.18	36	103.05	16	1	0.0130046	0.486743	0.37156	15.0482	97.3978	0.405	4.66122	92.0059
fwahsQ8615	2019-04-18	201908	S1_3-5-S1_4+5	4	31	2.23	22.47	69	697	90.9717	fwahsQ8615	0	1	0	0	0	8.29	250	869.4	876	872.7	5.6	1.8	30.9	0.18	36	103.05	16	1	0.0130046	0.486743	0.37156	15.0482	97.3978	0.414289	4.17447	90.9717
fwahsQ8615	2019-04-18	201909	S1_3-5-S1_4+5	5	29.77	2.28	20.43	68	608	89.9604	fwahsQ8615	0	1	0	0	0	8.29	250	869.4	876	872.7	5.6	1.8	30.9	0.18	36	103.05	16	1	0.0130046	0.486743	0.37156	15.0482	97.3978	0.423578	3.79548	89.9604
fwahsQ8615	2019-04-18	201910	S1_3-5-S1_4+5	6	30.42	2.71	22.67	82	689	89.3223	fwahsQ8615	0	1	0	0	0	8.29	250	869.4	876	872.7	5.6	1.8	30.9	0.18	36	103.05	16	1	0.0130046	0.486743	0.37156	15.0482	97.3978	0.503463	4.21163	89.3223
fwahsQ8615	2019-04-18	201911	S1_3-5-S1_4+5	7	30	2.23	15.73	67	472	87.5835	fwahsQ8615	0	1	0	0	0	8.29	250	869.4	876	872.7	5.6	1.8	30.9	0.18	36	103.05	16	1	0.0130046	0.486743	0.37156	15.0482	97.3978	0.414289	2.92232	87.5835
fwahsQ8615	2019-04-18	201912	S1_3-5-S1_4+5	8	31	2.07	14.37	64	446	87.4088	fwahsQ8615	0	1	0	0	0	8.29	250	869.4	876	872.7	5.6	1.8	30.9	0.18	36	103.05	16	1	0.0130046	0.486743	0.37156	15.0482	97.3978	0.384564	2.66966	87.4088
fwahsQ8615	2019-04-18	202001	S1_3-5-S1_4+5	9	31	2.1	16.67	65	517	88.8119	fwahsQ8615	0	1	0	0	0	8.29	250	869.4	876	872.7	5.6	1.8	30.9	0.18	36	103.05	16	1	0.0130046	0.486743	0.37156	15.0482	97.3978	0.390138	3.09695	88.8119
fwahsQ8615	2019-04-18	202002	S1_3-5-S1_4+5	10	29	1.89	23.46	55	680	92.5444	fwahsQ8615	0	1	0	0	0	8.29	250	869.4	876	872.7	5.6	1.8	30.9	0.18	36	103.05	16	1	0.0130046	0.486743	0.37156	15.0482	97.3978	0.351124	4.35839	92.5444
fwahsQ8615	2019-04-18	202003	S1_3-5-S1_4+5	11	31	2.49	38.58	77	1196	93.9372	fwahsQ8615	0	1	0	0	0	8.29	250	869.4	876	872.7	5.6	1.8	30.9	0.18	36	103.05	16	1	0.0130046	0.486743	0.37156	15.0482	97.3978	0.462592	7.16739	93.9372
fwahsQ8615	2019-04-18	202004	S1_3-5-S1_4+5	12	29.9	2.71	42.82	81	1280	94.0479	fwahsQ8615	0	1	0	0	0	8.29	250	869.4	876	872.7	5.6	1.8	30.9	0.18	36	103.05	16	1	0.0130046	0.486743	0.37156	15.0482	97.3978	0.503463	7.95509	94.0479
fwahsQ8615	2019-04-18	201905	P2_7-P2_9	1	30.68	3.71	42.24	114	1296	91.926	fwahsQ8615	0	1	0	0	0	8.29	250	1024.9	1031.2	1028.05	5.4	4.5	28.4	0.3	38	109.8	17	1	0.0541858	2.0281	1.54817	62.7007	97.3978	2.87185	32.6972	91.926
fwahsQ8615	2019-04-18	201906	P2_7-P2_9	2	29.6	3.29	32.25	97	955	90.7428	fwahsQ8615	0	1	0	0	0	8.29	250	1024.9	1031.2	1028.05	5.4	4.5	28.4	0.3	38	109.8	17	1	0.0541858	2.0281	1.54817	62.7007	97.3978	2.54673	24.9642	90.7428
fwahsQ8615	2019-04-18	201907	P2_7-P2_9	3	30.56	2.18	25.09	67	767	92.0059	fwahsQ8615	0	1	0	0	0	8.29	250	1024.9	1031.2	1028.05	5.4	4.5	28.4	0.3	38	109.8	17	1	0.0541858	2.0281	1.54817	62.7007	97.3978	1.6875	19.4217	92.0059
fwahsQ8615	2019-04-18	201908	P2_7-P2_9	4	31	2.23	22.47	69	697	90.9717	fwahsQ8615	0	1	0	0	0	8.29	250	1024.9	1031.2	1028.05	5.4	4.5	28.4	0.3	38	109.8	17	1	0.0541858	2.0281	1.54817	62.7007	97.3978	1.7262	17.3936	90.9717
fwahsQ8615	2019-04-18	201909	P2_7-P2_9	5	29.77	2.28	20.43	68	608	89.9604	fwahsQ8615	0	1	0	0	0	8.29	250	1024.9	1031.2	1028.05	5.4	4.5	28.4	0.3	38	109.8	17	1	0.0541858	2.0281	1.54817	62.7007	97.3978	1.76491	15.8145	89.9604
fwahsQ8615	2019-04-18	201910	P2_7-P2_9	6	30.42	2.71	22.67	82	689	89.3223	fwahsQ8615	0	1	0	0	0	8.29	250	1024.9	1031.2	1028.05	5.4	4.5	28.4	0.3	38	109.8	17	1	0.0541858	2.0281	1.54817	62.7007	97.3978	2.09776	17.5485	89.3223
fwahsQ8615	2019-04-18	201911	P2_7-P2_9	7	30	2.23	15.73	67	472	87.5835	fwahsQ8615	0	1	0	0	0	8.29	250	1024.9	1031.2	1028.05	5.4	4.5	28.4	0.3	38	109.8	17	1	0.0541858	2.0281	1.54817	62.7007	97.3978	1.7262	12.1763	87.5835
fwahsQ8615	2019-04-18	201912	P2_7-P2_9	8	31	2.07	14.37	64	446	87.4088	fwahsQ8615	0	1	0	0	0	8.29	250	1024.9	1031.2	1028.05	5.4	4.5	28.4	0.3	38	109.8	17	1	0.0541858	2.0281	1.54817	62.7007	97.3978	1.60235	11.1236	87.4088
fwahsQ8615	2019-04-18	202001	P2_7-P2_9	9	31	2.1	16.67	65	517	88.8119	fwahsQ8615	0	1	0	0	0	8.29	250	1024.9	1031.2	1028.05	5.4	4.5	28.4	0.3	38	109.8	17	1	0.0541858	2.0281	1.54817	62.7007	97.3978	1.62557	12.904	88.8119
fwahsQ8615	2019-04-18	202002	P2_7-P2_9	10	29	1.89	23.46	55	680	92.5444	fwahsQ8615	0	1	0	0	0	8.29	250	1024.9	1031.2	1028.05	5.4	4.5	28.4	0.3	38	109.8	17	1	0.0541858	2.0281	1.54817	62.7007	97.3978	1.46302	18.16	92.5444
fwahsQ8615	2019-04-18	202003	P2_7-P2_9	11	31	2.49	38.58	77	1196	93.9372	fwahsQ8615	0	1	0	0	0	8.29	250	1024.9	1031.2	1028.05	5.4	4.5	28.4	0.3	38	109.8	17	1	0.0541858	2.0281	1.54817	62.7007	97.3978	1.92747	29.8641	93.9372
fwahsQ8615	2019-04-18	202004	P2_7-P2_9	12	29.9	2.71	42.82	81	1280	94.0479	fwahsQ8615	0	1	0	0	0	8.29	250	1024.9	1031.2	1028.05	5.4	4.5	28.4	0.3	38	109.8	17	1	0.0541858	2.0281	1.54817	62.7007	97.3978	2.09776	33.1462	94.0479
DQF7egdS9p	2019-04-03	201905	G2_*28-G2_*30	1	31	4.77	59.09	148	1832	92.5305	DQF7egdS9p	0	1	0	0	0	8.45	260	1163.3	1168.8	1166.05	4.5	0.6	27.2	0.152	35	2098.05	0	1	0.687414	3.45826	16.4791	82.6309	83.4185	1.12293	13.9107	92.5305
DQF7egdS9p	2019-04-03	201906	G2_*28-G2_*30	2	30	3.49	35.65	105	1069	91.0833	DQF7egdS9p	0	1	0	0	0	8.45	260	1163.3	1168.8	1166.05	4.5	0.6	27.2	0.152	35	2098.05	0	1	0.687414	3.45826	16.4791	82.6309	83.4185	0.8216	8.39257	91.0833
DQF7egdS9p	2019-04-03	201907	G2_*28-G2_*30	3	31	2.95	25.12	92	779	89.4906	DQF7egdS9p	0	1	0	0	0	8.45	260	1163.3	1168.8	1166.05	4.5	0.6	27.2	0.152	35	2098.05	0	1	0.687414	3.45826	16.4791	82.6309	83.4185	0.694476	5.91364	89.4906
DQF7egdS9p	2019-04-03	201905	G2_*31-G2_34	1	31	4.77	59.09	148	1832	92.5305	DQF7egdS9p	0	1	0	0	0	8.45	260	1172.3	1179.4	1175.85	2.8	1	27.2	0.156	38	2180.05	0	1	1.17584	5.91544	28.1879	141.342	83.4185	1.92081	23.7946	92.5305
DQF7egdS9p	2019-04-03	201906	G2_*31-G2_34	2	30	3.49	35.65	105	1069	91.0833	DQF7egdS9p	0	1	0	0	0	8.45	260	1172.3	1179.4	1175.85	2.8	1	27.2	0.156	38	2180.05	0	1	1.17584	5.91544	28.1879	141.342	83.4185	1.40537	14.3557	91.0833
DQF7egdS9p	2019-04-03	201907	G2_*31-G2_34	3	31	2.95	25.12	92	779	89.4906	DQF7egdS9p	0	1	0	0	0	8.45	260	1172.3	1179.4	1175.85	2.8	1	27.2	0.156	38	2180.05	0	1	1.17584	5.91544	28.1879	141.342	83.4185	1.18792	10.1154	89.4906
DQF7egdS9p	2019-04-03	201905	G3_1-G3_3	1	31	4.77	59.09	148	1832	92.5305	DQF7egdS9p	0	1	0	0	0	8.45	260	1181.5	1188.3	1184.9	4.5	0.6	25.4	0.062	41	2540.8	0	1	0.280392	1.4106	6.72173	33.7047	83.4185	0.458038	5.6741	92.5305
DQF7egdS9p	2019-04-03	201906	G3_1-G3_3	2	30	3.49	35.65	105	1069	91.0833	DQF7egdS9p	0	1	0	0	0	8.45	260	1181.5	1188.3	1184.9	4.5	0.6	25.4	0.062	41	2540.8	0	1	0.280392	1.4106	6.72173	33.7047	83.4185	0.335126	3.42328	91.0833
DQF7egdS9p	2019-04-03	201907	G3_1-G3_3	3	31	2.95	25.12	92	779	89.4906	DQF7egdS9p	0	1	0	0	0	8.45	260	1181.5	1188.3	1184.9	4.5	0.6	25.4	0.062	41	2540.8	0	1	0.280392	1.4106	6.72173	33.7047	83.4185	0.283273	2.41214	89.4906
DQF7egdS9p	2019-04-03	201905	G3_4-G3_6	1	31	4.77	59.09	148	1832	92.5305	DQF7egdS9p	0	1	0	0	0	8.45	260	1190.7	1196.5	1193.6	4.9	1	26.1	0.103	34	2779.3	0	1	0.776355	3.9057	18.6113	93.3221	83.4185	1.26822	15.7106	92.5305
DQF7egdS9p	2019-04-03	201906	G3_4-G3_6	2	30	3.49	35.65	105	1069	91.0833	DQF7egdS9p	0	1	0	0	0	8.45	260	1190.7	1196.5	1193.6	4.9	1	26.1	0.103	34	2779.3	0	1	0.776355	3.9057	18.6113	93.3221	83.4185	0.927904	9.47845	91.0833
DQF7egdS9p	2019-04-03	201907	G3_4-G3_6	3	31	2.95	25.12	92	779	89.4906	DQF7egdS9p	0	1	0	0	0	8.45	260	1190.7	1196.5	1193.6	4.9	1	26.1	0.103	34	2779.3	0	1	0.776355	3.9057	18.6113	93.3221	83.4185	0.784331	6.67878	89.4906
CPexzi4026	2019-04-07	201905	PⅡ7-PⅡ9	1	0.92	6.5	59.2	7	59	90.1065	CPexzi4026	0	1	0	0	0	8.37	250	878.4	882.9	880.65	3	1.2	30.2	0.41	24	90.8	14	1	1.27716	13.9073	28.2939	306.911	91.589	2.55431	23.2639	90.1065
CPexzi4026	2019-04-07	201909	PⅡ7-PⅡ9	2	16.92	4.03	59.81	68	1012	93.6873	CPexzi4026	0	1	0	0	0	8.37	250	878.4	882.9	880.65	3	1.2	30.2	0.41	24	90.8	14	1	1.27716	13.9073	28.2939	306.911	91.589	1.58367	23.5036	93.6873
CPexzi4026	2019-04-07	201910	PⅡ7-PⅡ9	3	28.83	4.49	60.46	129	1743	93.087	CPexzi4026	0	1	0	0	0	8.37	250	878.4	882.9	880.65	3	1.2	30.2	0.41	24	90.8	14	1	1.27716	13.9073	28.2939	306.911	91.589	1.76444	23.759	93.087
CPexzi4026	2019-04-07	201911	PⅡ7-PⅡ9	4	29.83	5.16	62.62	154	1868	92.3871	CPexzi4026	0	1	0	0	0	8.37	250	878.4	882.9	880.65	3	1.2	30.2	0.41	24	90.8	14	1	1.27716	13.9073	28.2939	306.911	91.589	2.02773	24.6079	92.3871
CPexzi4026	2019-04-07	201912	PⅡ7-PⅡ9	5	30.96	4.92	61.45	152	1902	92.587	CPexzi4026	0	1	0	0	0	8.37	250	878.4	882.9	880.65	3	1.2	30.2	0.41	24	90.8	14	1	1.27716	13.9073	28.2939	306.911	91.589	1.93342	24.1481	92.587
CPexzi4026	2019-04-07	202001	PⅡ7-PⅡ9	6	30.96	4.93	58.96	153	1825	92.2836	CPexzi4026	0	1	0	0	0	8.37	250	878.4	882.9	880.65	3	1.2	30.2	0.41	24	90.8	14	1	1.27716	13.9073	28.2939	306.911	91.589	1.93735	23.1696	92.2836
CPexzi4026	2019-04-07	202002	PⅡ7-PⅡ9	7	18	4.7	56.85	85	1023	92.3639	CPexzi4026	0	1	0	0	0	8.37	250	878.4	882.9	880.65	3	1.2	30.2	0.41	24	90.8	14	1	1.27716	13.9073	28.2939	306.911	91.589	1.84696	22.3404	92.3639
SYPbmq9311	2019-04-14	201905	P2_9-P2_10	1	30.86	0.93	48.47	29	1496	98.1174	SYPbmq9311	0	1	0	0	0	8.81	106	996.9	1005.9	1001.4	5.8	2.2	29.4	0.32	30	38.94	6	1	0	0	0	0	0	0.292286	15.2334	98.1174
SYPbmq9311	2019-04-14	201906	P2_9-P2_10	2	29.61	0.55	49.5	16	1466	98.9011	SYPbmq9311	0	1	0	0	0	8.81	106	996.9	1005.9	1001.4	5.8	2.2	29.4	0.32	30	38.94	6	1	0	0	0	0	0	0.172857	15.5571	98.9011
SYPbmq9311	2019-04-14	201907	P2_9-P2_10	3	30.88	0.58	47.98	18	1481	98.8056	SYPbmq9311	0	1	0	0	0	8.81	106	996.9	1005.9	1001.4	5.8	2.2	29.4	0.32	30	38.94	6	1	0	0	0	0	0	0.182286	15.0794	98.8056
SYPbmq9311	2019-04-14	201908	P2_9-P2_10	4	31	0.56	43.97	17	1363	98.7424	SYPbmq9311	0	1	0	0	0	8.81	106	996.9	1005.9	1001.4	5.8	2.2	29.4	0.32	30	38.94	6	1	0	0	0	0	0	0.176	13.8191	98.7424
SYPbmq9311	2019-04-14	201909	P2_9-P2_10	5	30	0.45	44.02	13	1321	98.9881	SYPbmq9311	0	1	0	0	0	8.81	106	996.9	1005.9	1001.4	5.8	2.2	29.4	0.32	30	38.94	6	1	0	0	0	0	0	0.141429	13.8349	98.9881
SYPbmq9311	2019-04-14	201910	P2_9-P2_10	6	31	0.51	42.65	16	1322	98.8184	SYPbmq9311	0	1	0	0	0	8.81	106	996.9	1005.9	1001.4	5.8	2.2	29.4	0.32	30	38.94	6	1	0	0	0	0	0	0.160286	13.4043	98.8184
SYPbmq9311	2019-04-14	201911	P2_9-P2_10	7	30	0.55	52.53	17	1576	98.9638	SYPbmq9311	0	1	0	0	0	8.81	106	996.9	1005.9	1001.4	5.8	2.2	29.4	0.32	30	38.94	6	1	0	0	0	0	0	0.172857	16.5094	98.9638
SYPbmq9311	2019-04-14	201912	P2_9-P2_10	8	31	0.84	55.85	26	1731	98.5183	SYPbmq9311	0	1	0	0	0	8.81	106	996.9	1005.9	1001.4	5.8	2.2	29.4	0.32	30	38.94	6	1	0	0	0	0	0	0.264	17.5529	98.5183
SYPbmq9311	2019-04-14	202001	P2_9-P2_10	9	31	0.31	55.78	10	1729	99.4473	SYPbmq9311	0	1	0	0	0	8.81	106	996.9	1005.9	1001.4	5.8	2.2	29.4	0.32	30	38.94	6	1	0	0	0	0	0	0.0974286	17.5309	99.4473
DQOnPOV1yn	2019-04-30	201905	G1_14	1	6.04	4.79	31.84	29	192	86.9233	DQOnPOV1yn	0	1	0	0	0	8.56	150	1198.6	1203	1200.8	2.7	2.2	28.2	0.356	44	0	0	1	0.798906	2.49726	20.652	64.9451	75.7626	1.30162	8.6521	86.9233
DQOnPOV1yn	2019-04-30	201906	G1_14	2	23.08	3.45	64.76	80	1495	94.9421	DQOnPOV1yn	0	1	0	0	0	8.56	150	1198.6	1203	1200.8	2.7	2.2	28.2	0.356	44	0	0	1	0.798906	2.49726	20.652	64.9451	75.7626	0.937492	17.5977	94.9421
DQOnPOV1yn	2019-04-30	201907	G1_14	3	30.98	9.7	56.85	301	1761	85.4245	DQOnPOV1yn	0	1	0	0	0	8.56	150	1198.6	1203	1200.8	2.7	2.2	28.2	0.356	44	0	0	1	0.798906	2.49726	20.652	64.9451	75.7626	2.63585	15.4482	85.4245
DQOnPOV1yn	2019-04-30	201908	G1_14	4	30.92	10.1	42.18	312	1304	80.6809	DQOnPOV1yn	0	1	0	0	0	8.56	150	1198.6	1203	1200.8	2.7	2.2	28.2	0.356	44	0	0	1	0.798906	2.49726	20.652	64.9451	75.7626	2.74454	11.4619	80.6809
DQOnPOV1yn	2019-04-30	201909	G1_14	5	28.25	10.26	38.71	290	1093	79.0484	DQOnPOV1yn	0	1	0	0	0	8.56	150	1198.6	1203	1200.8	2.7	2.2	28.2	0.356	44	0	0	1	0.798906	2.49726	20.652	64.9451	75.7626	2.78802	10.5189	79.0484
DQOnPOV1yn	2019-04-30	201910	G1_14	6	30.97	10.01	36.21	310	1122	78.3427	DQOnPOV1yn	0	1	0	0	0	8.56	150	1198.6	1203	1200.8	2.7	2.2	28.2	0.356	44	0	0	1	0.798906	2.49726	20.652	64.9451	75.7626	2.72009	9.83959	78.3427
DQOnPOV1yn	2019-04-30	201911	G1_14	7	29.97	7.17	27.78	215	833	79.485	DQOnPOV1yn	0	1	0	0	0	8.56	150	1198.6	1203	1200.8	2.7	2.2	28.2	0.356	44	0	0	1	0.798906	2.49726	20.652	64.9451	75.7626	1.94835	7.54885	79.485
DQOnPOV1yn	2019-04-30	201912	G1_14	8	31	7.55	24.94	234	773	76.7621	DQOnPOV1yn	0	1	0	0	0	8.56	150	1198.6	1203	1200.8	2.7	2.2	28.2	0.356	44	0	0	1	0.798906	2.49726	20.652	64.9451	75.7626	2.05161	6.77712	76.7621
DQOnPOV1yn	2019-04-30	202001	G1_14	9	31	7	27.11	217	840	79.4782	DQOnPOV1yn	0	1	0	0	0	8.56	150	1198.6	1203	1200.8	2.7	2.2	28.2	0.356	44	0	0	1	0.798906	2.49726	20.652	64.9451	75.7626	1.90216	7.36679	79.4782
DQOnPOV1yn	2019-04-30	202002	G1_14	10	29	5.67	26.05	165	756	82.1248	DQOnPOV1yn	0	1	0	0	0	8.56	150	1198.6	1203	1200.8	2.7	2.2	28.2	0.356	44	0	0	1	0.798906	2.49726	20.652	64.9451	75.7626	1.54075	7.07875	82.1248
DQOnPOV1yn	2019-04-30	202003	G1_14	11	30.08	6.11	27.61	184	831	81.8802	DQOnPOV1yn	0	1	0	0	0	8.56	150	1198.6	1203	1200.8	2.7	2.2	28.2	0.356	44	0	0	1	0.798906	2.49726	20.652	64.9451	75.7626	1.66031	7.50265	81.8802
DQOnPOV1yn	2019-04-30	202004	G1_14	12	29.85	5.77	26.4	172	788	82.064	DQOnPOV1yn	0	1	0	0	0	8.56	150	1198.6	1203	1200.8	2.7	2.2	28.2	0.356	44	0	0	1	0.798906	2.49726	20.652	64.9451	75.7626	1.56792	7.17385	82.064
lhaOZN7802	2019-04-23	201905	S2_2-S2_3	1	31	5.11	58.59	158	1816	91.978	lhaOZN7802	0	1	0	0	0	10.21	300	976.8	983.3	980.05	1.6	1.4	30.5	0.33	41	86.4	13	1	1.46087	21.913	45.0435	678.087	93.75	3.11043	35.6635	91.978
lhaOZN7802	2019-04-23	201906	S2_2-S2_3	2	29.38	4.88	67.23	143	1975	93.2326	lhaOZN7802	0	1	0	0	0	10.21	300	976.8	983.3	980.05	1.6	1.4	30.5	0.33	41	86.4	13	1	1.46087	21.913	45.0435	678.087	93.75	2.97043	40.9226	93.2326
lhaOZN7802	2019-04-23	201907	S2_2-S2_3	3	30.88	4.49	69.81	139	2155	93.9569	lhaOZN7802	0	1	0	0	0	10.21	300	976.8	983.3	980.05	1.6	1.4	30.5	0.33	41	86.4	13	1	1.46087	21.913	45.0435	678.087	93.75	2.73304	42.493	93.9569
lhaOZN7802	2019-04-23	201908	S2_2-S2_3	4	30.92	3.98	68.89	123	2130	94.5382	lhaOZN7802	0	1	0	0	0	10.21	300	976.8	983.3	980.05	1.6	1.4	30.5	0.33	41	86.4	13	1	1.46087	21.913	45.0435	678.087	93.75	2.42261	41.933	94.5382
lhaOZN7802	2019-04-23	201909	S2_2-S2_3	5	29.81	3.77	71.28	112	2125	94.9767	lhaOZN7802	0	1	0	0	0	10.21	300	976.8	983.3	980.05	1.6	1.4	30.5	0.33	41	86.4	13	1	1.46087	21.913	45.0435	678.087	93.75	2.29478	43.3878	94.9767
lhaOZN7802	2019-04-23	201910	S2_2-S2_3	6	30.98	4.66	69.98	144	2168	93.7567	lhaOZN7802	0	1	0	0	0	10.21	300	976.8	983.3	980.05	1.6	1.4	30.5	0.33	41	86.4	13	1	1.46087	21.913	45.0435	678.087	93.75	2.83652	42.5965	93.7567
lhaOZN7802	2019-04-23	201911	S2_2-S2_3	7	29.83	4.22	69.92	126	2086	94.3081	lhaOZN7802	0	1	0	0	0	10.21	300	976.8	983.3	980.05	1.6	1.4	30.5	0.33	41	86.4	13	1	1.46087	21.913	45.0435	678.087	93.75	2.5687	42.56	94.3081
lhaOZN7802	2019-04-23	201912	S2_2-S2_3	8	31	4.75	68.28	147	2117	93.4958	lhaOZN7802	0	1	0	0	0	10.21	300	976.8	983.3	980.05	1.6	1.4	30.5	0.33	41	86.4	13	1	1.46087	21.913	45.0435	678.087	93.75	2.8913	41.5617	93.4958
lhaOZN7802	2019-04-23	202001	S2_2-S2_3	9	31	4.63	64.67	143	2005	93.3189	lhaOZN7802	0	1	0	0	0	10.21	300	976.8	983.3	980.05	1.6	1.4	30.5	0.33	41	86.4	13	1	1.46087	21.913	45.0435	678.087	93.75	2.81826	39.3643	93.3189
lhaOZN7802	2019-04-23	202002	S2_2-S2_3	10	29	6.29	64.64	182	1875	91.1321	lhaOZN7802	0	1	0	0	0	10.21	300	976.8	983.3	980.05	1.6	1.4	30.5	0.33	41	86.4	13	1	1.46087	21.913	45.0435	678.087	93.75	3.8287	39.3461	91.1321
lhaOZN7802	2019-04-23	202003	S2_2-S2_3	11	30.94	6.32	63.97	195	1979	91.0087	lhaOZN7802	0	1	0	0	0	10.21	300	976.8	983.3	980.05	1.6	1.4	30.5	0.33	41	86.4	13	1	1.46087	21.913	45.0435	678.087	93.75	3.84696	38.9383	91.0087
lhaOZN7802	2019-04-23	202004	S2_2-S2_3	12	30	6.34	59.15	190	1774	90.3191	lhaOZN7802	0	1	0	0	0	10.21	300	976.8	983.3	980.05	1.6	1.4	30.5	0.33	41	86.4	13	1	1.46087	21.913	45.0435	678.087	93.75	3.85913	36.0043	90.3191
lhaOZN7802	2019-04-23	201905	S2_4-S2_5+6	1	31	5.11	58.59	158	1816	91.978	lhaOZN7802	0	1	0	0	0	10.21	300	987.4	992.2	989.8	2.6	1	29.4	0.18	40	86.4	13	1	0.56917	8.53755	17.5494	264.19	93.75	1.21186	13.8949	91.978
lhaOZN7802	2019-04-23	201906	S2_4-S2_5+6	2	29.38	4.88	67.23	143	1975	93.2326	lhaOZN7802	0	1	0	0	0	10.21	300	987.4	992.2	989.8	2.6	1	29.4	0.18	40	86.4	13	1	0.56917	8.53755	17.5494	264.19	93.75	1.15731	15.9439	93.2326
lhaOZN7802	2019-04-23	201907	S2_4-S2_5+6	3	30.88	4.49	69.81	139	2155	93.9569	lhaOZN7802	0	1	0	0	0	10.21	300	987.4	992.2	989.8	2.6	1	29.4	0.18	40	86.4	13	1	0.56917	8.53755	17.5494	264.19	93.75	1.06482	16.5557	93.9569
lhaOZN7802	2019-04-23	201908	S2_4-S2_5+6	4	30.92	3.98	68.89	123	2130	94.5382	lhaOZN7802	0	1	0	0	0	10.21	300	987.4	992.2	989.8	2.6	1	29.4	0.18	40	86.4	13	1	0.56917	8.53755	17.5494	264.19	93.75	0.943874	16.3375	94.5382
lhaOZN7802	2019-04-23	201909	S2_4-S2_5+6	5	29.81	3.77	71.28	112	2125	94.9767	lhaOZN7802	0	1	0	0	0	10.21	300	987.4	992.2	989.8	2.6	1	29.4	0.18	40	86.4	13	1	0.56917	8.53755	17.5494	264.19	93.75	0.894071	16.9043	94.9767
lhaOZN7802	2019-04-23	201910	S2_4-S2_5+6	6	30.98	4.66	69.98	144	2168	93.7567	lhaOZN7802	0	1	0	0	0	10.21	300	987.4	992.2	989.8	2.6	1	29.4	0.18	40	86.4	13	1	0.56917	8.53755	17.5494	264.19	93.75	1.10514	16.596	93.7567
lhaOZN7802	2019-04-23	201911	S2_4-S2_5+6	7	29.83	4.22	69.92	126	2086	94.3081	lhaOZN7802	0	1	0	0	0	10.21	300	987.4	992.2	989.8	2.6	1	29.4	0.18	40	86.4	13	1	0.56917	8.53755	17.5494	264.19	93.75	1.00079	16.5818	94.3081
lhaOZN7802	2019-04-23	201912	S2_4-S2_5+6	8	31	4.75	68.28	147	2117	93.4958	lhaOZN7802	0	1	0	0	0	10.21	300	987.4	992.2	989.8	2.6	1	29.4	0.18	40	86.4	13	1	0.56917	8.53755	17.5494	264.19	93.75	1.12648	16.1929	93.4958
lhaOZN7802	2019-04-23	202001	S2_4-S2_5+6	9	31	4.63	64.67	143	2005	93.3189	lhaOZN7802	0	1	0	0	0	10.21	300	987.4	992.2	989.8	2.6	1	29.4	0.18	40	86.4	13	1	0.56917	8.53755	17.5494	264.19	93.75	1.09802	15.3368	93.3189
lhaOZN7802	2019-04-23	202002	S2_4-S2_5+6	10	29	6.29	64.64	182	1875	91.1321	lhaOZN7802	0	1	0	0	0	10.21	300	987.4	992.2	989.8	2.6	1	29.4	0.18	40	86.4	13	1	0.56917	8.53755	17.5494	264.19	93.75	1.4917	15.3296	91.1321
lhaOZN7802	2019-04-23	202003	S2_4-S2_5+6	11	30.94	6.32	63.97	195	1979	91.0087	lhaOZN7802	0	1	0	0	0	10.21	300	987.4	992.2	989.8	2.6	1	29.4	0.18	40	86.4	13	1	0.56917	8.53755	17.5494	264.19	93.75	1.49881	15.1708	91.0087
lhaOZN7802	2019-04-23	202004	S2_4-S2_5+6	12	30	6.34	59.15	190	1774	90.3191	lhaOZN7802	0	1	0	0	0	10.21	300	987.4	992.2	989.8	2.6	1	29.4	0.18	40	86.4	13	1	0.56917	8.53755	17.5494	264.19	93.75	1.50356	14.0277	90.3191
lhaOZN7802	2019-04-23	201905	S2_12-S2_13	1	31	5.11	58.59	158	1816	91.978	lhaOZN7802	0	1	0	0	0	10.21	300	1016.3	1021.1	1018.7	1.7	0.9	29.4	0.13	43	92.4	14	1	0.36996	5.54941	11.4071	171.723	93.75	0.787708	9.03166	91.978
lhaOZN7802	2019-04-23	201906	S2_12-S2_13	2	29.38	4.88	67.23	143	1975	93.2326	lhaOZN7802	0	1	0	0	0	10.21	300	1016.3	1021.1	1018.7	1.7	0.9	29.4	0.13	43	92.4	14	1	0.36996	5.54941	11.4071	171.723	93.75	0.752253	10.3635	93.2326
lhaOZN7802	2019-04-23	201907	S2_12-S2_13	3	30.88	4.49	69.81	139	2155	93.9569	lhaOZN7802	0	1	0	0	0	10.21	300	1016.3	1021.1	1018.7	1.7	0.9	29.4	0.13	43	92.4	14	1	0.36996	5.54941	11.4071	171.723	93.75	0.692134	10.7612	93.9569
lhaOZN7802	2019-04-23	201908	S2_12-S2_13	4	30.92	3.98	68.89	123	2130	94.5382	lhaOZN7802	0	1	0	0	0	10.21	300	1016.3	1021.1	1018.7	1.7	0.9	29.4	0.13	43	92.4	14	1	0.36996	5.54941	11.4071	171.723	93.75	0.613518	10.6194	94.5382
lhaOZN7802	2019-04-23	201909	S2_12-S2_13	5	29.81	3.77	71.28	112	2125	94.9767	lhaOZN7802	0	1	0	0	0	10.21	300	1016.3	1021.1	1018.7	1.7	0.9	29.4	0.13	43	92.4	14	1	0.36996	5.54941	11.4071	171.723	93.75	0.581146	10.9878	94.9767
lhaOZN7802	2019-04-23	201910	S2_12-S2_13	6	30.98	4.66	69.98	144	2168	93.7567	lhaOZN7802	0	1	0	0	0	10.21	300	1016.3	1021.1	1018.7	1.7	0.9	29.4	0.13	43	92.4	14	1	0.36996	5.54941	11.4071	171.723	93.75	0.71834	10.7874	93.7567
lhaOZN7802	2019-04-23	201911	S2_12-S2_13	7	29.83	4.22	69.92	126	2086	94.3081	lhaOZN7802	0	1	0	0	0	10.21	300	1016.3	1021.1	1018.7	1.7	0.9	29.4	0.13	43	92.4	14	1	0.36996	5.54941	11.4071	171.723	93.75	0.650514	10.7782	94.3081
lhaOZN7802	2019-04-23	201912	S2_12-S2_13	8	31	4.75	68.28	147	2117	93.4958	lhaOZN7802	0	1	0	0	0	10.21	300	1016.3	1021.1	1018.7	1.7	0.9	29.4	0.13	43	92.4	14	1	0.36996	5.54941	11.4071	171.723	93.75	0.732213	10.5254	93.4958
lhaOZN7802	2019-04-23	202001	S2_12-S2_13	9	31	4.63	64.67	143	2005	93.3189	lhaOZN7802	0	1	0	0	0	10.21	300	1016.3	1021.1	1018.7	1.7	0.9	29.4	0.13	43	92.4	14	1	0.36996	5.54941	11.4071	171.723	93.75	0.713715	9.96889	93.3189
lhaOZN7802	2019-04-23	202002	S2_12-S2_13	10	29	6.29	64.64	182	1875	91.1321	lhaOZN7802	0	1	0	0	0	10.21	300	1016.3	1021.1	1018.7	1.7	0.9	29.4	0.13	43	92.4	14	1	0.36996	5.54941	11.4071	171.723	93.75	0.969605	9.96427	91.1321
lhaOZN7802	2019-04-23	202003	S2_12-S2_13	11	30.94	6.32	63.97	195	1979	91.0087	lhaOZN7802	0	1	0	0	0	10.21	300	1016.3	1021.1	1018.7	1.7	0.9	29.4	0.13	43	92.4	14	1	0.36996	5.54941	11.4071	171.723	93.75	0.974229	9.86099	91.0087
lhaOZN7802	2019-04-23	202004	S2_12-S2_13	12	30	6.34	59.15	190	1774	90.3191	lhaOZN7802	0	1	0	0	0	10.21	300	1016.3	1021.1	1018.7	1.7	0.9	29.4	0.13	43	92.4	14	1	0.36996	5.54941	11.4071	171.723	93.75	0.977312	9.11798	90.3191
DQGKj7SBlv	2019-06-02	201907	P2_4-5	1	30.83	2.55	116.08	79	3579	97.8505	DQGKj7SBlv	0	1	0	0	0	11.16	125	1114.5	1119.6	1117.05	5.1	4.2	30.1	0.634	23	73.84	11.5	1	0.794247	7.63743	21.8706	214.101	90.5802	1.46763	66.8088	97.8505
DQGKj7SBlv	2019-06-02	201908	P2_4-5	2	30.81	3.08	123.59	95	3808	97.5685	DQGKj7SBlv	0	1	0	0	0	11.16	125	1114.5	1119.6	1117.05	5.1	4.2	30.1	0.634	23	73.84	11.5	1	0.794247	7.63743	21.8706	214.101	90.5802	1.77267	71.1312	97.5685
DQGKj7SBlv	2019-06-02	201909	P2_4-5	3	25.38	2.25	126.08	57	3200	98.2467	DQGKj7SBlv	0	1	0	0	0	11.16	125	1114.5	1119.6	1117.05	5.1	4.2	30.1	0.634	23	73.84	11.5	1	0.794247	7.63743	21.8706	214.101	90.5802	1.29497	72.5643	98.2467
DQGKj7SBlv	2019-06-02	201910	P2_4-5	4	30.17	3.58	115.63	108	3489	96.9969	DQGKj7SBlv	0	1	0	0	0	11.16	125	1114.5	1119.6	1117.05	5.1	4.2	30.1	0.634	23	73.84	11.5	1	0.794247	7.63743	21.8706	214.101	90.5802	2.06044	66.5499	96.9969
DQGKj7SBlv	2019-06-02	201911	P2_4-5	5	29.77	4.07	112.91	121	3361	96.5208	DQGKj7SBlv	0	1	0	0	0	11.16	125	1114.5	1119.6	1117.05	5.1	4.2	30.1	0.634	23	73.84	11.5	1	0.794247	7.63743	21.8706	214.101	90.5802	2.34245	64.9844	96.5208
DQGKj7SBlv	2019-06-02	202001	P2_4-5	6	31	3.62	137.24	112	4254	97.4301	DQGKj7SBlv	0	1	0	0	0	11.16	125	1114.5	1119.6	1117.05	5.1	4.2	30.1	0.634	23	73.84	11.5	1	0.794247	7.63743	21.8706	214.101	90.5802	2.08346	78.9873	97.4301
DQGKj7SBlv	2019-06-02	202002	P2_4-5	7	29	4.08	140.76	118	4082	97.1831	DQGKj7SBlv	0	1	0	0	0	11.16	125	1114.5	1119.6	1117.05	5.1	4.2	30.1	0.634	23	73.84	11.5	1	0.794247	7.63743	21.8706	214.101	90.5802	2.34821	81.0132	97.1831
DQGKj7SBlv	2019-06-02	202003	P2_4-5	8	31	2.96	123.16	92	3818	97.653	DQGKj7SBlv	0	1	0	0	0	11.16	125	1114.5	1119.6	1117.05	5.1	4.2	30.1	0.634	23	73.84	11.5	1	0.794247	7.63743	21.8706	214.101	90.5802	1.7036	70.8837	97.653
DQGKj7SBlv	2019-06-02	202004	P2_4-5	9	29.96	2.1	111.14	63	3329	98.1455	DQGKj7SBlv	0	1	0	0	0	11.16	125	1114.5	1119.6	1117.05	5.1	4.2	30.1	0.634	23	73.84	11.5	1	0.794247	7.63743	21.8706	214.101	90.5802	1.20864	63.9657	98.1455
DQGKj7SBlv	2019-06-02	202005	P2_4-5	10	28.12	2.38	124.33	67	3496	98.1217	DQGKj7SBlv	0	1	0	0	0	11.16	125	1114.5	1119.6	1117.05	5.1	4.2	30.1	0.634	23	73.84	11.5	1	0.794247	7.63743	21.8706	214.101	90.5802	1.36979	71.5571	98.1217
DQGKj7SBlv	2019-06-02	202006	P2_4-5	11	29.98	2.31	178.57	69	5353	98.7229	DQGKj7SBlv	0	1	0	0	0	11.16	125	1114.5	1119.6	1117.05	5.1	4.2	30.1	0.634	23	73.84	11.5	1	0.794247	7.63743	21.8706	214.101	90.5802	1.3295	102.774	98.7229
DQNVQ3CLLB	2019-06-07	201907	GⅢ1-GⅢ3	1	30.85	14.32	163.6	442	5047	91.9514	DQNVQ3CLLB	0	1	0	0	0	11.37	106	1192.2	1198.5	1195.35	4.2	0.8	30.2	0.28	27	39.76	6	1	2.02737	24.1087	62.0849	739.524	92.243	7.86775	89.8857	91.9514
DQNVQ3CLLB	2019-06-07	201908	GⅢ1-GⅢ3	2	30.88	11.59	164.06	358	5065	93.4017	DQNVQ3CLLB	0	1	0	0	0	11.37	106	1192.2	1198.5	1195.35	4.2	0.8	30.2	0.28	27	39.76	6	1	2.02737	24.1087	62.0849	739.524	92.243	6.36782	90.1384	93.4017
DQNVQ3CLLB	2019-06-07	201909	GⅢ1-GⅢ3	3	30	13.14	162.05	394	4861	92.4996	DQNVQ3CLLB	0	1	0	0	0	11.37	106	1192.2	1198.5	1195.35	4.2	0.8	30.2	0.28	27	39.76	6	1	2.02737	24.1087	62.0849	739.524	92.243	7.21943	89.0341	92.4996
DQNVQ3CLLB	2019-06-07	201910	GⅢ1-GⅢ3	4	30.51	12.39	161.76	378	4935	92.8854	DQNVQ3CLLB	0	1	0	0	0	11.37	106	1192.2	1198.5	1195.35	4.2	0.8	30.2	0.28	27	39.76	6	1	2.02737	24.1087	62.0849	739.524	92.243	6.80736	88.8748	92.8854
DQNVQ3CLLB	2019-06-07	201911	GⅢ1-GⅢ3	5	29.99	10.26	168.66	308	5057	94.2656	DQNVQ3CLLB	0	1	0	0	0	11.37	106	1192.2	1198.5	1195.35	4.2	0.8	30.2	0.28	27	39.76	6	1	2.02737	24.1087	62.0849	739.524	92.243	5.63709	92.6658	94.2656
DQNVQ3CLLB	2019-06-07	201912	GⅢ1-GⅢ3	6	31	7.97	170.56	247	5287	95.5358	DQNVQ3CLLB	0	1	0	0	0	11.37	106	1192.2	1198.5	1195.35	4.2	0.8	30.2	0.28	27	39.76	6	1	2.02737	24.1087	62.0849	739.524	92.243	4.37891	93.7097	95.5358
DQNVQ3CLLB	2019-06-07	202001	GⅢ1-GⅢ3	7	31	5.53	171.76	171	5325	96.8808	DQNVQ3CLLB	0	1	0	0	0	11.37	106	1192.2	1198.5	1195.35	4.2	0.8	30.2	0.28	27	39.76	6	1	2.02737	24.1087	62.0849	739.524	92.243	3.03831	94.369	96.8808
DQNVQ3CLLB	2019-06-07	202002	GⅢ1-GⅢ3	8	29	6.41	176.78	186	5127	96.5009	DQNVQ3CLLB	0	1	0	0	0	11.37	106	1192.2	1198.5	1195.35	4.2	0.8	30.2	0.28	27	39.76	6	1	2.02737	24.1087	62.0849	739.524	92.243	3.52181	97.1271	96.5009
DQNVQ3CLLB	2019-06-07	202003	GⅢ1-GⅢ3	9	31	7.01	177.21	217	5493	96.1948	DQNVQ3CLLB	0	1	0	0	0	11.37	106	1192.2	1198.5	1195.35	4.2	0.8	30.2	0.28	27	39.76	6	1	2.02737	24.1087	62.0849	739.524	92.243	3.85146	97.3634	96.1948
DQNVQ3CLLB	2019-06-07	202004	GⅢ1-GⅢ3	10	29.98	4.69	183.11	141	5490	97.5027	DQNVQ3CLLB	0	1	0	0	0	11.37	106	1192.2	1198.5	1195.35	4.2	0.8	30.2	0.28	27	39.76	6	1	2.02737	24.1087	62.0849	739.524	92.243	2.5768	100.605	97.5027
DQNVQ3CLLB	2019-06-07	202005	GⅢ1-GⅢ3	11	30.79	4.41	183.75	136	5658	97.6562	DQNVQ3CLLB	0	1	0	0	0	11.37	106	1192.2	1198.5	1195.35	4.2	0.8	30.2	0.28	27	39.76	6	1	2.02737	24.1087	62.0849	739.524	92.243	2.42296	100.957	97.6562
DQNVQ3CLLB	2019-06-07	202006	GⅢ1-GⅢ3	12	29.86	3.97	138.11	119	4124	97.2058	DQNVQ3CLLB	0	1	0	0	0	11.37	106	1192.2	1198.5	1195.35	4.2	0.8	30.2	0.28	27	39.76	6	1	2.02737	24.1087	62.0849	739.524	92.243	2.18121	75.8809	97.2058
DQFeCACgx8	2019-06-02	201907	P2_4_1-P2_7	1	30.98	3.31	44.03	103	1364	93.008	DQFeCACgx8	0	1	0	0	0	10.01	125	1165.2	1174.1	1169.65	5.8	0.8	26.2	0.094	32	100.54	15	2	0.271948	2.23932	8.39215	69.0493	89.1709	0.35162	4.67729	93.008
DQFeCACgx8	2019-06-02	201908	P2_4_1-P2_7	2	30.96	4.38	38.99	136	1207	89.9009	DQFeCACgx8	0	1	0	0	0	10.01	125	1165.2	1174.1	1169.65	5.8	0.8	26.2	0.094	32	100.54	15	2	0.271948	2.23932	8.39215	69.0493	89.1709	0.465286	4.1419	89.9009
DQFeCACgx8	2019-06-02	201909	P2_4_1-P2_7	3	29.92	4.62	44.27	138	1324	90.5502	DQFeCACgx8	0	1	0	0	0	10.01	125	1165.2	1174.1	1169.65	5.8	0.8	26.2	0.094	32	100.54	15	2	0.271948	2.23932	8.39215	69.0493	89.1709	0.490781	4.70279	90.5502
DQFeCACgx8	2019-06-02	201910	P2_4_1-P2_7	4	30.97	5.54	44.19	172	1369	88.8598	DQFeCACgx8	0	1	0	0	0	10.01	125	1165.2	1174.1	1169.65	5.8	0.8	26.2	0.094	32	100.54	15	2	0.271948	2.23932	8.39215	69.0493	89.1709	0.588513	4.69429	88.8598
DQFeCACgx8	2019-06-02	201911	P2_4_1-P2_7	5	30	3.99	41.37	120	1241	91.2037	DQFeCACgx8	0	1	0	0	0	10.01	125	1165.2	1174.1	1169.65	5.8	0.8	26.2	0.094	32	100.54	15	2	0.271948	2.23932	8.39215	69.0493	89.1709	0.423856	4.39472	91.2037
DQFeCACgx8	2019-06-02	201912	P2_4_1-P2_7	6	31	4.03	42.1	125	1305	91.2638	DQFeCACgx8	0	1	0	0	0	10.01	125	1165.2	1174.1	1169.65	5.8	0.8	26.2	0.094	32	100.54	15	2	0.271948	2.23932	8.39215	69.0493	89.1709	0.428106	4.47227	91.2638
DQFeCACgx8	2019-06-02	202001	P2_4_1-P2_7	7	31	3.44	37.02	107	1148	91.4978	DQFeCACgx8	0	1	0	0	0	10.01	125	1165.2	1174.1	1169.65	5.8	0.8	26.2	0.094	32	100.54	15	2	0.271948	2.23932	8.39215	69.0493	89.1709	0.36543	3.93262	91.4978
DQFeCACgx8	2019-06-02	202002	P2_4_1-P2_7	8	28.98	4.53	28	131	811	86.0744	DQFeCACgx8	0	1	0	0	0	10.01	125	1165.2	1174.1	1169.65	5.8	0.8	26.2	0.094	32	100.54	15	2	0.271948	2.23932	8.39215	69.0493	89.1709	0.481221	2.97443	86.0744
DQFeCACgx8	2019-06-02	202003	P2_4_1-P2_7	9	31	3.22	30.01	100	930	90.31	DQFeCACgx8	0	1	0	0	0	10.01	125	1165.2	1174.1	1169.65	5.8	0.8	26.2	0.094	32	100.54	15	2	0.271948	2.23932	8.39215	69.0493	89.1709	0.34206	3.18795	90.31
JLjOaR6727	2019-09-09	201910	S1_1	1	29.44	1.71	35.86	50	1056	95.4485	JLjOaR6727	0	1	0	0	0	8.2	250	844.8	845.9	845.35	1	0.8	29.5	0.11	34	96.6	15	1	0.334724	7.58528	10.2577	235.117	95.7737	0.461595	9.68	95.4485
JLjOaR6727	2019-09-09	201911	S1_1	2	30	2.1	40.29	63	1209	95.046	JLjOaR6727	0	1	0	0	0	8.2	250	844.8	845.9	845.35	1	0.8	29.5	0.11	34	96.6	15	1	0.334724	7.58528	10.2577	235.117	95.7737	0.566871	10.8758	95.046
JLjOaR6727	2019-09-09	201912	S1_1	3	31	2.55	41.54	79	1288	94.2164	JLjOaR6727	0	1	0	0	0	8.2	250	844.8	845.9	845.35	1	0.8	29.5	0.11	34	96.6	15	1	0.334724	7.58528	10.2577	235.117	95.7737	0.688344	11.2133	94.2164
JLjOaR6727	2019-09-09	202001	S1_1	4	31	1.79	35.78	56	1109	95.2356	JLjOaR6727	0	1	0	0	0	8.2	250	844.8	845.9	845.35	1	0.8	29.5	0.11	34	96.6	15	1	0.334724	7.58528	10.2577	235.117	95.7737	0.48319	9.6584	95.2356
JLjOaR6727	2019-09-09	202002	S1_1	5	28.98	1.52	25.1	44	727	94.29	JLjOaR6727	0	1	0	0	0	8.2	250	844.8	845.9	845.35	1	0.8	29.5	0.11	34	96.6	15	1	0.334724	7.58528	10.2577	235.117	95.7737	0.410307	6.77546	94.29
JLjOaR6727	2019-09-09	202003	S1_1	6	29.71	3.07	31.27	91	929	91.06	JLjOaR6727	0	1	0	0	0	8.2	250	844.8	845.9	845.35	1	0.8	29.5	0.11	34	96.6	15	1	0.334724	7.58528	10.2577	235.117	95.7737	0.828712	8.44098	91.06
JLjOaR6727	2019-09-09	202004	S1_1	7	30	2.98	25.13	89	754	89.3988	JLjOaR6727	0	1	0	0	0	8.2	250	844.8	845.9	845.35	1	0.8	29.5	0.11	34	96.6	15	1	0.334724	7.58528	10.2577	235.117	95.7737	0.804417	6.78356	89.3988
JLjOaR6727	2019-09-09	202005	S1_1	8	30.58	3.81	39.92	116	1221	91.2874	JLjOaR6727	0	1	0	0	0	8.2	250	844.8	845.9	845.35	1	0.8	29.5	0.11	34	96.6	15	1	0.334724	7.58528	10.2577	235.117	95.7737	1.02847	10.776	91.2874
JLjOaR6727	2019-09-09	202006	S1_1	9	29.9	2.33	42.02	70	1256	94.7463	JLjOaR6727	0	1	0	0	0	8.2	250	844.8	845.9	845.35	1	0.8	29.5	0.11	34	96.6	15	1	0.334724	7.58528	10.2577	235.117	95.7737	0.628957	11.3428	94.7463
JLjOaR6727	2019-09-09	202007	S1_1	10	27.83	1.68	33.13	47	922	95.1738	JLjOaR6727	0	1	0	0	0	8.2	250	844.8	845.9	845.35	1	0.8	29.5	0.11	34	96.6	15	1	0.334724	7.58528	10.2577	235.117	95.7737	0.453497	8.94307	95.1738
JLjOaR6727	2019-09-09	202008	S1_1	11	30.28	1.26	19.46	38	589	93.9189	JLjOaR6727	0	1	0	0	0	8.2	250	844.8	845.9	845.35	1	0.8	29.5	0.11	34	96.6	15	1	0.334724	7.58528	10.2577	235.117	95.7737	0.340123	5.25301	93.9189
JLjOaR6727	2019-09-09	201910	S3_1-S3_3	1	29.44	1.71	35.86	50	1056	95.4485	JLjOaR6727	0	1	0	0	0	8.2	250	922.9	930.6	926.75	3.9	1.7	29.5	0.14	44	108.9	17	1	0.905276	20.5147	27.7423	635.883	95.7737	1.2484	26.18	95.4485
JLjOaR6727	2019-09-09	201911	S3_1-S3_3	2	30	2.1	40.29	63	1209	95.046	JLjOaR6727	0	1	0	0	0	8.2	250	922.9	930.6	926.75	3.9	1.7	29.5	0.14	44	108.9	17	1	0.905276	20.5147	27.7423	635.883	95.7737	1.53313	29.4142	95.046
JLjOaR6727	2019-09-09	201912	S3_1-S3_3	3	31	2.55	41.54	79	1288	94.2164	JLjOaR6727	0	1	0	0	0	8.2	250	922.9	930.6	926.75	3.9	1.7	29.5	0.14	44	108.9	17	1	0.905276	20.5147	27.7423	635.883	95.7737	1.86166	30.3267	94.2164
JLjOaR6727	2019-09-09	202001	S3_1-S3_3	4	31	1.79	35.78	56	1109	95.2356	JLjOaR6727	0	1	0	0	0	8.2	250	922.9	930.6	926.75	3.9	1.7	29.5	0.14	44	108.9	17	1	0.905276	20.5147	27.7423	635.883	95.7737	1.30681	26.1216	95.2356
JLjOaR6727	2019-09-09	202002	S3_1-S3_3	5	28.98	1.52	25.1	44	727	94.29	JLjOaR6727	0	1	0	0	0	8.2	250	922.9	930.6	926.75	3.9	1.7	29.5	0.14	44	108.9	17	1	0.905276	20.5147	27.7423	635.883	95.7737	1.10969	18.3245	94.29
JLjOaR6727	2019-09-09	202003	S3_1-S3_3	6	29.71	3.07	31.27	91	929	91.06	JLjOaR6727	0	1	0	0	0	8.2	250	922.9	930.6	926.75	3.9	1.7	29.5	0.14	44	108.9	17	1	0.905276	20.5147	27.7423	635.883	95.7737	2.24129	22.829	91.06
JLjOaR6727	2019-09-09	202004	S3_1-S3_3	7	30	2.98	25.13	89	754	89.3988	JLjOaR6727	0	1	0	0	0	8.2	250	922.9	930.6	926.75	3.9	1.7	29.5	0.14	44	108.9	17	1	0.905276	20.5147	27.7423	635.883	95.7737	2.17558	18.3464	89.3988
JLjOaR6727	2019-09-09	202005	S3_1-S3_3	8	30.58	3.81	39.92	116	1221	91.2874	JLjOaR6727	0	1	0	0	0	8.2	250	922.9	930.6	926.75	3.9	1.7	29.5	0.14	44	108.9	17	1	0.905276	20.5147	27.7423	635.883	95.7737	2.78153	29.144	91.2874
JLjOaR6727	2019-09-09	202006	S3_1-S3_3	9	29.9	2.33	42.02	70	1256	94.7463	JLjOaR6727	0	1	0	0	0	8.2	250	922.9	930.6	926.75	3.9	1.7	29.5	0.14	44	108.9	17	1	0.905276	20.5147	27.7423	635.883	95.7737	1.70104	30.6772	94.7463
JLjOaR6727	2019-09-09	202007	S3_1-S3_3	10	27.83	1.68	33.13	47	922	95.1738	JLjOaR6727	0	1	0	0	0	8.2	250	922.9	930.6	926.75	3.9	1.7	29.5	0.14	44	108.9	17	1	0.905276	20.5147	27.7423	635.883	95.7737	1.2265	24.1869	95.1738
JLjOaR6727	2019-09-09	202008	S3_1-S3_3	11	30.28	1.26	19.46	38	589	93.9189	JLjOaR6727	0	1	0	0	0	8.2	250	922.9	930.6	926.75	3.9	1.7	29.5	0.14	44	108.9	17	1	0.905276	20.5147	27.7423	635.883	95.7737	0.919877	14.207	93.9189
dySmuu7391	2019-09-29	201910	G2_14-G2_15	1	20.08	1.33	65.72	27	1320	98.0164	dySmuu7391	0	1	0	0	0	9.66	300	1014.2	1019	1016.6	3.7	2.7	0	0.185	25	81.12	13	1	0	0	0	0	0	0.463436	22.9	98.0164
dySmuu7391	2019-09-29	201911	G2_14-G2_15	2	30	1.65	63.46	49	1904	97.4658	dySmuu7391	0	1	0	0	0	9.66	300	1014.2	1019	1016.6	3.7	2.7	0	0.185	25	81.12	13	1	0	0	0	0	0	0.574939	22.1125	97.4658
dySmuu7391	2019-09-29	201912	G2_14-G2_15	3	31	4.09	73.75	127	2286	94.7456	dySmuu7391	0	1	0	0	0	9.66	300	1014.2	1019	1016.6	3.7	2.7	0	0.185	25	81.12	13	1	0	0	0	0	0	1.42515	25.698	94.7456
dySmuu7391	2019-09-29	202001	G2_14-G2_15	4	31	3.21	60.87	99	1887	94.9906	dySmuu7391	0	1	0	0	0	9.66	300	1014.2	1019	1016.6	3.7	2.7	0	0.185	25	81.12	13	1	0	0	0	0	0	1.11852	21.21	94.9906
dySmuu7391	2019-09-29	202003	G2_14-G2_15	5	27.67	1.83	75.04	51	2076	97.6194	dySmuu7391	0	1	0	0	0	9.66	300	1014.2	1019	1016.6	3.7	2.7	0	0.185	25	81.12	13	1	0	0	0	0	0	0.63766	26.1475	97.6194
dySmuu7391	2019-09-29	202004	G2_14-G2_15	6	29.92	4.86	83.35	145	2494	94.4904	dySmuu7391	0	1	0	0	0	9.66	300	1014.2	1019	1016.6	3.7	2.7	0	0.185	25	81.12	13	1	0	0	0	0	0	1.69346	29.0431	94.4904
dySmuu7391	2019-09-29	202005	G2_14-G2_15	7	30.9	5.12	81.55	158	2519	94.0925	dySmuu7391	0	1	0	0	0	9.66	300	1014.2	1019	1016.6	3.7	2.7	0	0.185	25	81.12	13	1	0	0	0	0	0	1.78405	28.4159	94.0925
dySmuu7391	2019-09-29	202006	G2_14-G2_15	8	30	4.53	76.34	136	2290	94.3984	dySmuu7391	0	1	0	0	0	9.66	300	1014.2	1019	1016.6	3.7	2.7	0	0.185	25	81.12	13	1	0	0	0	0	0	1.57847	26.6005	94.3984
dySmuu7391	2019-09-29	202007	G2_14-G2_15	9	30.54	4.95	84.03	151	2566	94.437	dySmuu7391	0	1	0	0	0	9.66	300	1014.2	1019	1016.6	3.7	2.7	0	0.185	25	81.12	13	1	0	0	0	0	0	1.72482	29.2801	94.437
dySmuu7391	2019-09-29	202008	G2_14-G2_15	10	29.9	3.76	66.19	112	1979	94.6247	dySmuu7391	0	1	0	0	0	9.66	300	1014.2	1019	1016.6	3.7	2.7	0	0.185	25	81.12	13	1	0	0	0	0	0	1.31016	23.0638	94.6247
dySmuu7391	2019-09-29	202009	G2_14-G2_15	11	29.31	0.92	32.42	27	950	97.2406	dySmuu7391	0	1	0	0	0	9.66	300	1014.2	1019	1016.6	3.7	2.7	0	0.185	25	81.12	13	1	0	0	0	0	0	0.320572	11.2967	97.2406
rDeBca5063	2019-11-05	201912	P2_6-P2_9	1	31	1.59	44.53	49	1380	96.5525	rDeBca5063	0	1	0	0	0	10.29	250	1084.1	1092.3	1088.2	3.1	1.1	29.5	0.32	44	97.86	15	1	0	0	0	0	0	0.878619	24.6068	96.5525
rDeBca5063	2019-11-05	202001	P2_6-P2_9	2	31	2.09	41.76	65	1295	95.2338	rDeBca5063	0	1	0	0	0	10.29	250	1084.1	1092.3	1088.2	3.1	1.1	29.5	0.32	44	97.86	15	1	0	0	0	0	0	1.15491	23.0762	95.2338
rDeBca5063	2019-11-05	202002	P2_6-P2_9	3	28.85	1.88	34.81	54	1004	94.876	rDeBca5063	0	1	0	0	0	10.29	250	1084.1	1092.3	1088.2	3.1	1.1	29.5	0.32	44	97.86	15	1	0	0	0	0	0	1.03887	19.2357	94.876
rDeBca5063	2019-11-05	202003	P2_6-P2_9	4	31	1.81	37.64	56	1167	95.4119	rDeBca5063	0	1	0	0	0	10.29	250	1084.1	1092.3	1088.2	3.1	1.1	29.5	0.32	44	97.86	15	1	0	0	0	0	0	1.00019	20.7995	95.4119
rDeBca5063	2019-11-05	202004	P2_6-P2_9	5	29.92	1.27	35.92	38	1075	96.5851	rDeBca5063	0	1	0	0	0	10.29	250	1084.1	1092.3	1088.2	3.1	1.1	29.5	0.32	44	97.86	15	1	0	0	0	0	0	0.70179	19.849	96.5851
rDeBca5063	2019-11-05	202005	P2_6-P2_9	6	30.96	0.99	34.22	31	1060	97.1883	rDeBca5063	0	1	0	0	0	10.29	250	1084.1	1092.3	1088.2	3.1	1.1	29.5	0.32	44	97.86	15	1	0	0	0	0	0	0.547064	18.9096	97.1883
rDeBca5063	2019-11-05	201912	P2_10	1	31	1.59	44.53	49	1380	96.5525	rDeBca5063	0	1	0	0	0	10.29	250	1096.2	1099	1097.6	3.6	1.5	29.2	0.19	52	98	15	1	0	0	0	0	0	0.711381	19.9232	96.5525
rDeBca5063	2019-11-05	202001	P2_10	2	31	2.09	41.76	65	1295	95.2338	rDeBca5063	0	1	0	0	0	10.29	250	1096.2	1099	1097.6	3.6	1.5	29.2	0.19	52	98	15	1	0	0	0	0	0	0.935086	18.6838	95.2338
rDeBca5063	2019-11-05	202002	P2_10	3	28.85	1.88	34.81	54	1004	94.876	rDeBca5063	0	1	0	0	0	10.29	250	1096.2	1099	1097.6	3.6	1.5	29.2	0.19	52	98	15	1	0	0	0	0	0	0.84113	15.5743	94.876
rDeBca5063	2019-11-05	202003	P2_10	4	31	1.81	37.64	56	1167	95.4119	rDeBca5063	0	1	0	0	0	10.29	250	1096.2	1099	1097.6	3.6	1.5	29.2	0.19	52	98	15	1	0	0	0	0	0	0.809812	16.8405	95.4119
rDeBca5063	2019-11-05	202004	P2_10	5	29.92	1.27	35.92	38	1075	96.5851	rDeBca5063	0	1	0	0	0	10.29	250	1096.2	1099	1097.6	3.6	1.5	29.2	0.19	52	98	15	1	0	0	0	0	0	0.56821	16.071	96.5851
rDeBca5063	2019-11-05	202005	P2_10	6	30.96	0.99	34.22	31	1060	97.1883	rDeBca5063	0	1	0	0	0	10.29	250	1096.2	1099	1097.6	3.6	1.5	29.2	0.19	52	98	15	1	0	0	0	0	0	0.442936	15.3104	97.1883
PvwqUe8501	2019-11-03	201912	S1_1	1	31	3.82	66.57	118	2064	94.5731	PvwqUe8501	0	1	0	0	0	10.5	250	938.5	940.6	939.55	2.4	1.2	27.9	0.04	0	0	0	1	0.206294	3.6264	5.68528	100.305	94.6175	0.310254	5.4067	94.5731
PvwqUe8501	2019-11-03	202001	S1_1	2	31	3.17	62.87	98	1949	95.1999	PvwqUe8501	0	1	0	0	0	10.5	250	938.5	940.6	939.55	2.4	1.2	27.9	0.04	0	0	0	1	0.206294	3.6264	5.68528	100.305	94.6175	0.257462	5.10619	95.1999
PvwqUe8501	2019-11-03	202002	S1_1	3	29	2.95	61.76	85	1791	95.4412	PvwqUe8501	0	1	0	0	0	10.5	250	938.5	940.6	939.55	2.4	1.2	27.9	0.04	0	0	0	1	0.206294	3.6264	5.68528	100.305	94.6175	0.239594	5.01604	95.4412
PvwqUe8501	2019-11-03	202003	S1_1	4	31	3.81	61.23	118	1898	94.1421	PvwqUe8501	0	1	0	0	0	10.5	250	938.5	940.6	939.55	2.4	1.2	27.9	0.04	0	0	0	1	0.206294	3.6264	5.68528	100.305	94.6175	0.309442	4.97299	94.1421
PvwqUe8501	2019-11-03	202004	S1_1	5	17.92	4.19	63.17	75	1132	93.7797	PvwqUe8501	0	1	0	0	0	10.5	250	938.5	940.6	939.55	2.4	1.2	27.9	0.04	0	0	0	1	0.206294	3.6264	5.68528	100.305	94.6175	0.340305	5.13056	93.7797
PvwqUe8501	2019-11-03	202005	S1_1	6	9.6	3.23	57.69	31	554	94.698	PvwqUe8501	0	1	0	0	0	10.5	250	938.5	940.6	939.55	2.4	1.2	27.9	0.04	0	0	0	1	0.206294	3.6264	5.68528	100.305	94.6175	0.262335	4.68548	94.698
PvwqUe8501	2019-11-03	202006	S1_1	7	15.59	3.63	69	57	1076	95.0021	PvwqUe8501	0	1	0	0	0	10.5	250	938.5	940.6	939.55	2.4	1.2	27.9	0.04	0	0	0	1	0.206294	3.6264	5.68528	100.305	94.6175	0.294822	5.60406	95.0021
PvwqUe8501	2019-11-03	201912	S3_10-P2_1	1	31	3.82	66.57	118	2064	94.5731	PvwqUe8501	0	1	0	0	0	10.5	250	1061.2	1099.8	1080.5	6.6	1.5	29	0.2	0	98.77	16	1	1.28934	22.665	35.533	626.904	94.6175	1.93909	33.7919	94.5731
PvwqUe8501	2019-11-03	202001	S3_10-P2_1	2	31	3.17	62.87	98	1949	95.1999	PvwqUe8501	0	1	0	0	0	10.5	250	1061.2	1099.8	1080.5	6.6	1.5	29	0.2	0	98.77	16	1	1.28934	22.665	35.533	626.904	94.6175	1.60914	31.9137	95.1999
PvwqUe8501	2019-11-03	202002	S3_10-P2_1	3	29	2.95	61.76	85	1791	95.4412	PvwqUe8501	0	1	0	0	0	10.5	250	1061.2	1099.8	1080.5	6.6	1.5	29	0.2	0	98.77	16	1	1.28934	22.665	35.533	626.904	94.6175	1.49746	31.3503	95.4412
PvwqUe8501	2019-11-03	202003	S3_10-P2_1	4	31	3.81	61.23	118	1898	94.1421	PvwqUe8501	0	1	0	0	0	10.5	250	1061.2	1099.8	1080.5	6.6	1.5	29	0.2	0	98.77	16	1	1.28934	22.665	35.533	626.904	94.6175	1.93401	31.0812	94.1421
PvwqUe8501	2019-11-03	202004	S3_10-P2_1	5	17.92	4.19	63.17	75	1132	93.7797	PvwqUe8501	0	1	0	0	0	10.5	250	1061.2	1099.8	1080.5	6.6	1.5	29	0.2	0	98.77	16	1	1.28934	22.665	35.533	626.904	94.6175	2.1269	32.066	93.7797
PvwqUe8501	2019-11-03	202005	S3_10-P2_1	6	9.6	3.23	57.69	31	554	94.698	PvwqUe8501	0	1	0	0	0	10.5	250	1061.2	1099.8	1080.5	6.6	1.5	29	0.2	0	98.77	16	1	1.28934	22.665	35.533	626.904	94.6175	1.63959	29.2843	94.698
PvwqUe8501	2019-11-03	202006	S3_10-P2_1	7	15.59	3.63	69	57	1076	95.0021	PvwqUe8501	0	1	0	0	0	10.5	250	1061.2	1099.8	1080.5	6.6	1.5	29	0.2	0	98.77	16	1	1.28934	22.665	35.533	626.904	94.6175	1.84264	35.0254	95.0021
PvwqUe8501	2019-11-03	201912	P2_5-P2_6	1	31	3.82	66.57	118	2064	94.5731	PvwqUe8501	0	1	0	0	0	10.5	250	1113.9	1117.6	1115.75	2.8	0.9	28.3	0.13	0	86.76	15	1	0.502843	8.83934	13.8579	244.492	94.6175	0.756244	13.1788	94.5731
PvwqUe8501	2019-11-03	202001	P2_5-P2_6	2	31	3.17	62.87	98	1949	95.1999	PvwqUe8501	0	1	0	0	0	10.5	250	1113.9	1117.6	1115.75	2.8	0.9	28.3	0.13	0	86.76	15	1	0.502843	8.83934	13.8579	244.492	94.6175	0.627563	12.4463	95.1999
PvwqUe8501	2019-11-03	202002	P2_5-P2_6	3	29	2.95	61.76	85	1791	95.4412	PvwqUe8501	0	1	0	0	0	10.5	250	1113.9	1117.6	1115.75	2.8	0.9	28.3	0.13	0	86.76	15	1	0.502843	8.83934	13.8579	244.492	94.6175	0.58401	12.2266	95.4412
PvwqUe8501	2019-11-03	202003	P2_5-P2_6	4	31	3.81	61.23	118	1898	94.1421	PvwqUe8501	0	1	0	0	0	10.5	250	1113.9	1117.6	1115.75	2.8	0.9	28.3	0.13	0	86.76	15	1	0.502843	8.83934	13.8579	244.492	94.6175	0.754264	12.1217	94.1421
PvwqUe8501	2019-11-03	202004	P2_5-P2_6	5	17.92	4.19	63.17	75	1132	93.7797	PvwqUe8501	0	1	0	0	0	10.5	250	1113.9	1117.6	1115.75	2.8	0.9	28.3	0.13	0	86.76	15	1	0.502843	8.83934	13.8579	244.492	94.6175	0.829492	12.5057	93.7797
PvwqUe8501	2019-11-03	202005	P2_5-P2_6	6	9.6	3.23	57.69	31	554	94.698	PvwqUe8501	0	1	0	0	0	10.5	250	1113.9	1117.6	1115.75	2.8	0.9	28.3	0.13	0	86.76	15	1	0.502843	8.83934	13.8579	244.492	94.6175	0.639442	11.4209	94.698
PvwqUe8501	2019-11-03	202006	P2_5-P2_6	7	15.59	3.63	69	57	1076	95.0021	PvwqUe8501	0	1	0	0	0	10.5	250	1113.9	1117.6	1115.75	2.8	0.9	28.3	0.13	0	86.76	15	1	0.502843	8.83934	13.8579	244.492	94.6175	0.718629	13.6599	95.0021
PvwqUe8501	2019-11-03	201912	P2_7-P2_8	1	31	3.82	66.57	118	2064	94.5731	PvwqUe8501	0	1	0	0	0	10.5	250	1119.9	1121.4	1120.65	1.8	0.6	29.3	0.21	0	84.85	15	1	0.541523	9.51929	14.9239	263.299	94.6175	0.814416	14.1926	94.5731
PvwqUe8501	2019-11-03	202001	P2_7-P2_8	2	31	3.17	62.87	98	1949	95.1999	PvwqUe8501	0	1	0	0	0	10.5	250	1119.9	1121.4	1120.65	1.8	0.6	29.3	0.21	0	84.85	15	1	0.541523	9.51929	14.9239	263.299	94.6175	0.675838	13.4038	95.1999
PvwqUe8501	2019-11-03	202002	P2_7-P2_8	3	29	2.95	61.76	85	1791	95.4412	PvwqUe8501	0	1	0	0	0	10.5	250	1119.9	1121.4	1120.65	1.8	0.6	29.3	0.21	0	84.85	15	1	0.541523	9.51929	14.9239	263.299	94.6175	0.628934	13.1671	95.4412
PvwqUe8501	2019-11-03	202003	P2_7-P2_8	4	31	3.81	61.23	118	1898	94.1421	PvwqUe8501	0	1	0	0	0	10.5	250	1119.9	1121.4	1120.65	1.8	0.6	29.3	0.21	0	84.85	15	1	0.541523	9.51929	14.9239	263.299	94.6175	0.812284	13.0541	94.1421
PvwqUe8501	2019-11-03	202004	P2_7-P2_8	5	17.92	4.19	63.17	75	1132	93.7797	PvwqUe8501	0	1	0	0	0	10.5	250	1119.9	1121.4	1120.65	1.8	0.6	29.3	0.21	0	84.85	15	1	0.541523	9.51929	14.9239	263.299	94.6175	0.893299	13.4677	93.7797
PvwqUe8501	2019-11-03	202005	P2_7-P2_8	6	9.6	3.23	57.69	31	554	94.698	PvwqUe8501	0	1	0	0	0	10.5	250	1119.9	1121.4	1120.65	1.8	0.6	29.3	0.21	0	84.85	15	1	0.541523	9.51929	14.9239	263.299	94.6175	0.688629	12.2994	94.698
PvwqUe8501	2019-11-03	202006	P2_7-P2_8	7	15.59	3.63	69	57	1076	95.0021	PvwqUe8501	0	1	0	0	0	10.5	250	1119.9	1121.4	1120.65	1.8	0.6	29.3	0.21	0	84.85	15	1	0.541523	9.51929	14.9239	263.299	94.6175	0.773909	14.7107	95.0021
OdQPVS4364	2019-11-20	201912	P2_1-P2_2	1	30.75	6.05	62.18	186	1912	91.1329	OdQPVS4364	0	1	0	0	0	9.16	250	1024.2	1029.8	1027	5.2	2.4	28.8	0.19	32	109.35	17	1	1.94275	16.5347	58.425	499.225	89.4859	2.87375	29.5355	91.1329
OdQPVS4364	2019-11-20	202001	P2_1-P2_2	2	31	6.82	58.2	211	1804	89.5109	OdQPVS4364	0	1	0	0	0	9.16	250	1024.2	1029.8	1027	5.2	2.4	28.8	0.19	32	109.35	17	1	1.94275	16.5347	58.425	499.225	89.4859	3.2395	27.645	89.5109
OdQPVS4364	2019-11-20	202003	P2_1-P2_2	3	30.94	6.81	59.87	211	1852	89.787	OdQPVS4364	0	1	0	0	0	9.16	250	1024.2	1029.8	1027	5.2	2.4	28.8	0.19	32	109.35	17	1	1.94275	16.5347	58.425	499.225	89.4859	3.23475	28.4382	89.787
OdQPVS4364	2019-11-20	202004	P2_1-P2_2	4	30	7.49	54.32	225	1629	87.8822	OdQPVS4364	0	1	0	0	0	9.16	250	1024.2	1029.8	1027	5.2	2.4	28.8	0.19	32	109.35	17	1	1.94275	16.5347	58.425	499.225	89.4859	3.55775	25.802	87.8822
OdQPVS4364	2019-11-20	202005	P2_1-P2_2	5	30.98	5.95	61.02	184	1890	91.1154	OdQPVS4364	0	1	0	0	0	9.16	250	1024.2	1029.8	1027	5.2	2.4	28.8	0.19	32	109.35	17	1	1.94275	16.5347	58.425	499.225	89.4859	2.82625	28.9845	91.1154
OdQPVS4364	2019-11-20	202006	P2_1-P2_2	6	29.71	5.6	58.53	166	1739	91.2677	OdQPVS4364	0	1	0	0	0	9.16	250	1024.2	1029.8	1027	5.2	2.4	28.8	0.19	32	109.35	17	1	1.94275	16.5347	58.425	499.225	89.4859	2.66	27.8017	91.2677
OdQPVS4364	2019-11-20	202007	P2_1-P2_2	7	31	5.55	58.94	172	1827	91.394	OdQPVS4364	0	1	0	0	0	9.16	250	1024.2	1029.8	1027	5.2	2.4	28.8	0.19	32	109.35	17	1	1.94275	16.5347	58.425	499.225	89.4859	2.63625	27.9965	91.394
OdQPVS4364	2019-11-20	202008	P2_1-P2_2	8	31	4.88	61.09	151	1894	92.6027	OdQPVS4364	0	1	0	0	0	9.16	250	1024.2	1029.8	1027	5.2	2.4	28.8	0.19	32	109.35	17	1	1.94275	16.5347	58.425	499.225	89.4859	2.318	29.0177	92.6027
OdQPVS4364	2019-11-20	202009	P2_1-P2_2	9	30	5.55	57.5	167	1725	91.1975	OdQPVS4364	0	1	0	0	0	9.16	250	1024.2	1029.8	1027	5.2	2.4	28.8	0.19	32	109.35	17	1	1.94275	16.5347	58.425	499.225	89.4859	2.63625	27.3125	91.1975
OdQPVS4364	2019-11-20	201912	P2_3-P2_4	1	30.75	6.05	62.18	186	1912	91.1329	OdQPVS4364	0	1	0	0	0	9.16	250	1033.2	1036.1	1034.65	2.3	1.5	28.8	0.18	31	103.6	16	1	1.15031	9.79031	34.5938	295.594	89.4859	1.70156	17.4881	91.1329
OdQPVS4364	2019-11-20	202001	P2_3-P2_4	2	31	6.82	58.2	211	1804	89.5109	OdQPVS4364	0	1	0	0	0	9.16	250	1033.2	1036.1	1034.65	2.3	1.5	28.8	0.18	31	103.6	16	1	1.15031	9.79031	34.5938	295.594	89.4859	1.91813	16.3688	89.5109
OdQPVS4364	2019-11-20	202003	P2_3-P2_4	3	30.94	6.81	59.87	211	1852	89.787	OdQPVS4364	0	1	0	0	0	9.16	250	1033.2	1036.1	1034.65	2.3	1.5	28.8	0.18	31	103.6	16	1	1.15031	9.79031	34.5938	295.594	89.4859	1.91531	16.8384	89.787
OdQPVS4364	2019-11-20	202004	P2_3-P2_4	4	30	7.49	54.32	225	1629	87.8822	OdQPVS4364	0	1	0	0	0	9.16	250	1033.2	1036.1	1034.65	2.3	1.5	28.8	0.18	31	103.6	16	1	1.15031	9.79031	34.5938	295.594	89.4859	2.10656	15.2775	87.8822
OdQPVS4364	2019-11-20	202005	P2_3-P2_4	5	30.98	5.95	61.02	184	1890	91.1154	OdQPVS4364	0	1	0	0	0	9.16	250	1033.2	1036.1	1034.65	2.3	1.5	28.8	0.18	31	103.6	16	1	1.15031	9.79031	34.5938	295.594	89.4859	1.67344	17.1619	91.1154
OdQPVS4364	2019-11-20	202006	P2_3-P2_4	6	29.71	5.6	58.53	166	1739	91.2677	OdQPVS4364	0	1	0	0	0	9.16	250	1033.2	1036.1	1034.65	2.3	1.5	28.8	0.18	31	103.6	16	1	1.15031	9.79031	34.5938	295.594	89.4859	1.575	16.4616	91.2677
OdQPVS4364	2019-11-20	202007	P2_3-P2_4	7	31	5.55	58.94	172	1827	91.394	OdQPVS4364	0	1	0	0	0	9.16	250	1033.2	1036.1	1034.65	2.3	1.5	28.8	0.18	31	103.6	16	1	1.15031	9.79031	34.5938	295.594	89.4859	1.56094	16.5769	91.394
OdQPVS4364	2019-11-20	202008	P2_3-P2_4	8	31	4.88	61.09	151	1894	92.6027	OdQPVS4364	0	1	0	0	0	9.16	250	1033.2	1036.1	1034.65	2.3	1.5	28.8	0.18	31	103.6	16	1	1.15031	9.79031	34.5938	295.594	89.4859	1.3725	17.1816	92.6027
OdQPVS4364	2019-11-20	202009	P2_3-P2_4	9	30	5.55	57.5	167	1725	91.1975	OdQPVS4364	0	1	0	0	0	9.16	250	1033.2	1036.1	1034.65	2.3	1.5	28.8	0.18	31	103.6	16	1	1.15031	9.79031	34.5938	295.594	89.4859	1.56094	16.1719	91.1975
OdQPVS4364	2019-11-20	201912	P2_10	1	30.75	6.05	62.18	186	1912	91.1329	OdQPVS4364	0	1	0	0	0	9.16	250	1054.1	1056	1055.05	2.8	1.8	28.5	0.13	42	103.6	16	1	0.996938	8.48494	29.9813	256.181	89.4859	1.47469	15.1564	91.1329
OdQPVS4364	2019-11-20	202001	P2_10	2	31	6.82	58.2	211	1804	89.5109	OdQPVS4364	0	1	0	0	0	9.16	250	1054.1	1056	1055.05	2.8	1.8	28.5	0.13	42	103.6	16	1	0.996938	8.48494	29.9813	256.181	89.4859	1.66238	14.1863	89.5109
OdQPVS4364	2019-11-20	202003	P2_10	3	30.94	6.81	59.87	211	1852	89.787	OdQPVS4364	0	1	0	0	0	9.16	250	1054.1	1056	1055.05	2.8	1.8	28.5	0.13	42	103.6	16	1	0.996938	8.48494	29.9813	256.181	89.4859	1.65994	14.5933	89.787
OdQPVS4364	2019-11-20	202004	P2_10	4	30	7.49	54.32	225	1629	87.8822	OdQPVS4364	0	1	0	0	0	9.16	250	1054.1	1056	1055.05	2.8	1.8	28.5	0.13	42	103.6	16	1	0.996938	8.48494	29.9813	256.181	89.4859	1.82569	13.2405	87.8822
OdQPVS4364	2019-11-20	202005	P2_10	5	30.98	5.95	61.02	184	1890	91.1154	OdQPVS4364	0	1	0	0	0	9.16	250	1054.1	1056	1055.05	2.8	1.8	28.5	0.13	42	103.6	16	1	0.996938	8.48494	29.9813	256.181	89.4859	1.45031	14.8736	91.1154
OdQPVS4364	2019-11-20	202006	P2_10	6	29.71	5.6	58.53	166	1739	91.2677	OdQPVS4364	0	1	0	0	0	9.16	250	1054.1	1056	1055.05	2.8	1.8	28.5	0.13	42	103.6	16	1	0.996938	8.48494	29.9813	256.181	89.4859	1.365	14.2667	91.2677
OdQPVS4364	2019-11-20	202007	P2_10	7	31	5.55	58.94	172	1827	91.394	OdQPVS4364	0	1	0	0	0	9.16	250	1054.1	1056	1055.05	2.8	1.8	28.5	0.13	42	103.6	16	1	0.996938	8.48494	29.9813	256.181	89.4859	1.35281	14.3666	91.394
OdQPVS4364	2019-11-20	202008	P2_10	8	31	4.88	61.09	151	1894	92.6027	OdQPVS4364	0	1	0	0	0	9.16	250	1054.1	1056	1055.05	2.8	1.8	28.5	0.13	42	103.6	16	1	0.996938	8.48494	29.9813	256.181	89.4859	1.1895	14.8907	92.6027
OdQPVS4364	2019-11-20	202009	P2_10	9	30	5.55	57.5	167	1725	91.1975	OdQPVS4364	0	1	0	0	0	9.16	250	1054.1	1056	1055.05	2.8	1.8	28.5	0.13	42	103.6	16	1	0.996938	8.48494	29.9813	256.181	89.4859	1.35281	14.0156	91.1975
jEDuKQ2081	2019-11-26	201912	S1_1-S1_4+5	1	27.73	2.1	52.43	58	1454	96.1489	jEDuKQ2081	0	1	0	0	0	11.26	125	861.7	879.3	870.5	11.2	2.8	30.2	0.476	31	165.64	29	2	0.825137	16.9357	25.4672	521.059	95.3542	1.06962	26.7049	96.1489
jEDuKQ2081	2019-11-26	202001	S1_1-S1_4+5	2	31	2.45	52.13	76	1616	95.5112	jEDuKQ2081	0	1	0	0	0	11.26	125	861.7	879.3	870.5	11.2	2.8	30.2	0.476	31	165.64	29	2	0.825137	16.9357	25.4672	521.059	95.3542	1.24789	26.5521	95.5112
jEDuKQ2081	2019-11-26	202002	S1_1-S1_4+5	3	29	2.21	52.71	64	1529	95.976	jEDuKQ2081	0	1	0	0	0	11.26	125	861.7	879.3	870.5	11.2	2.8	30.2	0.476	31	165.64	29	2	0.825137	16.9357	25.4672	521.059	95.3542	1.12565	26.8475	95.976
jEDuKQ2081	2019-11-26	202003	S1_1-S1_4+5	4	30.94	2.08	49.34	64	1527	95.9549	jEDuKQ2081	0	1	0	0	0	11.26	125	861.7	879.3	870.5	11.2	2.8	30.2	0.476	31	165.64	29	2	0.825137	16.9357	25.4672	521.059	95.3542	1.05944	25.131	95.9549
jEDuKQ2081	2019-11-26	202004	S1_1-S1_4+5	5	22.92	2.4	55	55	1260	95.8188	jEDuKQ2081	0	1	0	0	0	11.26	125	861.7	879.3	870.5	11.2	2.8	30.2	0.476	31	165.64	29	2	0.825137	16.9357	25.4672	521.059	95.3542	1.22243	28.0139	95.8188
jEDuKQ2081	2019-11-26	202005	S1_1-S1_4+5	6	30.98	2.07	54.02	64	1674	96.3095	jEDuKQ2081	0	1	0	0	0	11.26	125	861.7	879.3	870.5	11.2	2.8	30.2	0.476	31	165.64	29	2	0.825137	16.9357	25.4672	521.059	95.3542	1.05434	27.5148	96.3095
jEDuKQ2081	2019-11-26	202006	S1_1-S1_4+5	7	29.75	1.64	41.3	49	1229	96.1807	jEDuKQ2081	0	1	0	0	0	11.26	125	861.7	879.3	870.5	11.2	2.8	30.2	0.476	31	165.64	29	2	0.825137	16.9357	25.4672	521.059	95.3542	0.835324	21.0359	96.1807
jEDuKQ2081	2019-11-26	201912	P2_10	1	27.73	2.1	52.43	58	1454	96.1489	jEDuKQ2081	0	1	0	0	0	11.26	125	1045.5	1050.8	1048.15	4.9	1	28.5	0.267	31	92.64	16	1	0.1653	3.39273	5.10185	104.384	95.3542	0.214278	5.3498	96.1489
jEDuKQ2081	2019-11-26	202001	P2_10	2	31	2.45	52.13	76	1616	95.5112	jEDuKQ2081	0	1	0	0	0	11.26	125	1045.5	1050.8	1048.15	4.9	1	28.5	0.267	31	92.64	16	1	0.1653	3.39273	5.10185	104.384	95.3542	0.24999	5.31918	95.5112
jEDuKQ2081	2019-11-26	202002	P2_10	3	29	2.21	52.71	64	1529	95.976	jEDuKQ2081	0	1	0	0	0	11.26	125	1045.5	1050.8	1048.15	4.9	1	28.5	0.267	31	92.64	16	1	0.1653	3.39273	5.10185	104.384	95.3542	0.225502	5.37837	95.976
jEDuKQ2081	2019-11-26	202003	P2_10	4	30.94	2.08	49.34	64	1527	95.9549	jEDuKQ2081	0	1	0	0	0	11.26	125	1045.5	1050.8	1048.15	4.9	1	28.5	0.267	31	92.64	16	1	0.1653	3.39273	5.10185	104.384	95.3542	0.212237	5.0345	95.9549
jEDuKQ2081	2019-11-26	202004	P2_10	5	22.92	2.4	55	55	1260	95.8188	jEDuKQ2081	0	1	0	0	0	11.26	125	1045.5	1050.8	1048.15	4.9	1	28.5	0.267	31	92.64	16	1	0.1653	3.39273	5.10185	104.384	95.3542	0.244889	5.61203	95.8188
jEDuKQ2081	2019-11-26	202005	P2_10	6	30.98	2.07	54.02	64	1674	96.3095	jEDuKQ2081	0	1	0	0	0	11.26	125	1045.5	1050.8	1048.15	4.9	1	28.5	0.267	31	92.64	16	1	0.1653	3.39273	5.10185	104.384	95.3542	0.211216	5.51203	96.3095
jEDuKQ2081	2019-11-26	202006	P2_10	7	29.75	1.64	41.3	49	1229	96.1807	jEDuKQ2081	0	1	0	0	0	11.26	125	1045.5	1050.8	1048.15	4.9	1	28.5	0.267	31	92.64	16	1	0.1653	3.39273	5.10185	104.384	95.3542	0.167341	4.21412	96.1807
MusGMX1533	2019-11-25	201912	G2_19-G2_21	1	0.96	2.53	146.12	3	146	98.298	MusGMX1533	0	1	0	0	0	9.81	300	1068.2	1077.7	1072.95	7.8	2.6	0	0.04	25	2345	45	1	0.0284092	0.549802	0.891269	16.9341	95.0867	0.140932	8.13952	98.298
MusGMX1533	2019-11-25	202003	G2_19-G2_21	2	14.94	8.12	71.44	121	1067	89.7939	MusGMX1533	0	1	0	0	0	9.81	300	1068.2	1077.7	1072.95	7.8	2.6	0	0.04	25	2345	45	1	0.0284092	0.549802	0.891269	16.9341	95.0867	0.452319	3.97952	89.7939
MusGMX1533	2019-11-25	202004	G2_19-G2_21	3	30	12.91	73.8	387	2214	85.1113	MusGMX1533	0	1	0	0	0	9.81	300	1068.2	1077.7	1072.95	7.8	2.6	0	0.04	25	2345	45	1	0.0284092	0.549802	0.891269	16.9341	95.0867	0.719143	4.11098	85.1113
MusGMX1533	2019-11-25	202005	G2_19-G2_21	4	31	11.52	75.18	357	2331	86.7128	MusGMX1533	0	1	0	0	0	9.81	300	1068.2	1077.7	1072.95	7.8	2.6	0	0.04	25	2345	45	1	0.0284092	0.549802	0.891269	16.9341	95.0867	0.641714	4.18785	86.7128
MusGMX1533	2019-11-25	202006	G2_19-G2_21	5	30	6.91	78.79	207	2364	91.937	MusGMX1533	0	1	0	0	0	9.81	300	1068.2	1077.7	1072.95	7.8	2.6	0	0.04	25	2345	45	1	0.0284092	0.549802	0.891269	16.9341	95.0867	0.384917	4.38894	91.937
MusGMX1533	2019-11-25	202007	G2_19-G2_21	6	30.92	5.06	83.67	156	2587	94.2973	MusGMX1533	0	1	0	0	0	9.81	300	1068.2	1077.7	1072.95	7.8	2.6	0	0.04	25	2345	45	1	0.0284092	0.549802	0.891269	16.9341	95.0867	0.281864	4.66078	94.2973
MusGMX1533	2019-11-25	202008	G2_19-G2_21	7	30.42	5.32	85.2	162	2591	94.1228	MusGMX1533	0	1	0	0	0	9.81	300	1068.2	1077.7	1072.95	7.8	2.6	0	0.04	25	2345	45	1	0.0284092	0.549802	0.891269	16.9341	95.0867	0.296347	4.74601	94.1228
MusGMX1533	2019-11-25	202009	G2_19-G2_21	8	29.81	4.96	84.84	147	2531	94.4766	MusGMX1533	0	1	0	0	0	9.81	300	1068.2	1077.7	1072.95	7.8	2.6	0	0.04	25	2345	45	1	0.0284092	0.549802	0.891269	16.9341	95.0867	0.276294	4.72596	94.4766
MusGMX1533	2019-11-25	202010	G2_19-G2_21	9	31	4.39	87.03	136	2698	95.198	MusGMX1533	0	1	0	0	0	9.81	300	1068.2	1077.7	1072.95	7.8	2.6	0	0.04	25	2345	45	1	0.0284092	0.549802	0.891269	16.9341	95.0867	0.244542	4.84795	95.198
MusGMX1533	2019-11-25	202011	G2_19-G2_21	10	30	6.27	79.38	188	2381	92.6795	MusGMX1533	0	1	0	0	0	9.81	300	1068.2	1077.7	1072.95	7.8	2.6	0	0.04	25	2345	45	1	0.0284092	0.549802	0.891269	16.9341	95.0867	0.349266	4.42181	92.6795
jgQxwj8987	2019-11-13	201912	P2_4-P2_5	1	30.96	2.52	42.06	78	1302	94.3472	jgQxwj8987	0	1	0	0	0	8.38	250	1061.1	1065.1	1063.1	2.5	1.4	28.5	0.19	35	103.95	16	1	0	0	0	0	0	0.275852	4.6041	94.3472
jgQxwj8987	2019-11-13	202001	P2_4-P2_5	2	31	3.05	40.22	95	1247	92.9512	jgQxwj8987	0	1	0	0	0	8.38	250	1061.1	1065.1	1063.1	2.5	1.4	28.5	0.19	35	103.95	16	1	0	0	0	0	0	0.333868	4.40268	92.9512
jgQxwj8987	2019-11-13	202002	P2_4-P2_5	3	29	3.24	40.42	94	1172	92.579	jgQxwj8987	0	1	0	0	0	8.38	250	1061.1	1065.1	1063.1	2.5	1.4	28.5	0.19	35	103.95	16	1	0	0	0	0	0	0.354667	4.42458	92.579
jgQxwj8987	2019-11-13	202003	P2_4-P2_5	4	31	3.11	33.66	97	1043	91.542	jgQxwj8987	0	1	0	0	0	8.38	250	1061.1	1065.1	1063.1	2.5	1.4	28.5	0.19	35	103.95	16	1	0	0	0	0	0	0.340436	3.68459	91.542
jgQxwj8987	2019-11-13	202004	P2_4-P2_5	5	29.63	2.57	27.14	76	804	91.3497	jgQxwj8987	0	1	0	0	0	8.38	250	1061.1	1065.1	1063.1	2.5	1.4	28.5	0.19	35	103.95	16	1	0	0	0	0	0	0.281325	2.97088	91.3497
jgQxwj8987	2019-11-13	202005	P2_4-P2_5	6	31	1.84	21.05	57	653	91.9616	jgQxwj8987	0	1	0	0	0	8.38	250	1061.1	1065.1	1063.1	2.5	1.4	28.5	0.19	35	103.95	16	1	0	0	0	0	0	0.201416	2.30424	91.9616
jgQxwj8987	2019-11-13	202006	P2_4-P2_5	7	29.96	1.93	20.6	58	617	91.4336	jgQxwj8987	0	1	0	0	0	8.38	250	1061.1	1065.1	1063.1	2.5	1.4	28.5	0.19	35	103.95	16	1	0	0	0	0	0	0.211267	2.25498	91.4336
jgQxwj8987	2019-11-13	202007	P2_4-P2_5	8	30.86	2.12	19.99	65	617	90.4116	jgQxwj8987	0	1	0	0	0	8.38	250	1061.1	1065.1	1063.1	2.5	1.4	28.5	0.19	35	103.95	16	1	0	0	0	0	0	0.232066	2.18821	90.4116
jgQxwj8987	2019-11-13	202008	P2_4-P2_5	9	30.31	2.71	25.26	82	766	90.311	jgQxwj8987	0	1	0	0	0	8.38	250	1061.1	1065.1	1063.1	2.5	1.4	28.5	0.19	35	103.95	16	1	0	0	0	0	0	0.29665	2.76509	90.311
jgQxwj8987	2019-11-13	202009	P2_4-P2_5	10	29.96	3.33	26.35	100	789	88.7803	jgQxwj8987	0	1	0	0	0	8.38	250	1061.1	1065.1	1063.1	2.5	1.4	28.5	0.19	35	103.95	16	1	0	0	0	0	0	0.364519	2.8844	88.7803
jgQxwj8987	2019-11-13	202010	P2_4-P2_5	11	30.04	3.55	28.29	107	850	88.8505	jgQxwj8987	0	1	0	0	0	8.38	250	1061.1	1065.1	1063.1	2.5	1.4	28.5	0.19	35	103.95	16	1	0	0	0	0	0	0.388601	3.09677	88.8505
jgQxwj8987	2019-11-13	202011	P2_4-P2_5	12	29.15	2.89	25.34	84	739	89.7627	jgQxwj8987	0	1	0	0	0	8.38	250	1061.1	1065.1	1063.1	2.5	1.4	28.5	0.19	35	103.95	16	1	0	0	0	0	0	0.316354	2.77384	89.7627
GrgyjZ3629	2019-11-29	201912	G3_5-G3_6-7	1	4	3.52	51.61	14	206	93.6151	GrgyjZ3629	0	1	0	0	0	8.77	250	1112	1118.2	1115.1	5.2	3.4	0	0.6	40	4025	50	1	0.96482	5.68759	27.3145	173.58	85.4967	1.55076	22.7372	93.6151
GrgyjZ3629	2019-11-29	202001	G3_5-G3_6-7	2	31	5.85	72.57	181	2250	92.5402	GrgyjZ3629	0	1	0	0	0	8.77	250	1112	1118.2	1115.1	5.2	3.4	0	0.6	40	4025	50	1	0.96482	5.68759	27.3145	173.58	85.4967	2.57726	31.9712	92.5402
GrgyjZ3629	2019-11-29	202002	G3_5-G3_6-7	3	29	8.58	69.46	249	2014	89.0056	GrgyjZ3629	0	1	0	0	0	8.77	250	1112	1118.2	1115.1	5.2	3.4	0	0.6	40	4025	50	1	0.96482	5.68759	27.3145	173.58	85.4967	3.77998	30.6011	89.0056
GrgyjZ3629	2019-11-29	202003	G3_5-G3_6-7	4	31	9.38	60.75	291	1883	86.6248	GrgyjZ3629	0	1	0	0	0	8.77	250	1112	1118.2	1115.1	5.2	3.4	0	0.6	40	4025	50	1	0.96482	5.68759	27.3145	173.58	85.4967	4.13243	26.7638	86.6248
GrgyjZ3629	2019-11-29	202004	G3_5-G3_6-7	5	29.98	11.37	61.27	341	1837	84.3475	GrgyjZ3629	0	1	0	0	0	8.77	250	1112	1118.2	1115.1	5.2	3.4	0	0.6	40	4025	50	1	0.96482	5.68759	27.3145	173.58	85.4967	5.00914	26.9929	84.3475
GrgyjZ3629	2019-11-29	202005	G3_5-G3_6-7	6	30.88	10.82	58.83	334	1816	84.4652	GrgyjZ3629	0	1	0	0	0	8.77	250	1112	1118.2	1115.1	5.2	3.4	0	0.6	40	4025	50	1	0.96482	5.68759	27.3145	173.58	85.4967	4.76683	25.918	84.4652
GrgyjZ3629	2019-11-29	202006	G3_5-G3_6-7	7	29.92	11.68	50.73	349	1518	81.2851	GrgyjZ3629	0	1	0	0	0	8.77	250	1112	1118.2	1115.1	5.2	3.4	0	0.6	40	4025	50	1	0.96482	5.68759	27.3145	173.58	85.4967	5.14571	22.3495	81.2851
GrgyjZ3629	2019-11-29	202007	G3_5-G3_6-7	8	30.56	10.25	47.46	313	1450	82.2388	GrgyjZ3629	0	1	0	0	0	8.77	250	1112	1118.2	1115.1	5.2	3.4	0	0.6	40	4025	50	1	0.96482	5.68759	27.3145	173.58	85.4967	4.51571	20.9088	82.2388
GrgyjZ3629	2019-11-29	202008	G3_5-G3_6-7	9	29.98	8.84	47.62	265	1428	84.3429	GrgyjZ3629	0	1	0	0	0	8.77	250	1112	1118.2	1115.1	5.2	3.4	0	0.6	40	4025	50	1	0.96482	5.68759	27.3145	173.58	85.4967	3.89453	20.9793	84.3429
GrgyjZ3629	2019-11-29	202009	G3_5-G3_6-7	10	28.81	9.5	41.24	274	1186	81.2771	GrgyjZ3629	0	1	0	0	0	8.77	250	1112	1118.2	1115.1	5.2	3.4	0	0.6	40	4025	50	1	0.96482	5.68759	27.3145	173.58	85.4967	4.18529	18.1686	81.2771
GrgyjZ3629	2019-11-29	202010	G3_5-G3_6-7	11	31	11.49	41.15	356	1276	78.1725	GrgyjZ3629	0	1	0	0	0	8.77	250	1112	1118.2	1115.1	5.2	3.4	0	0.6	40	4025	50	1	0.96482	5.68759	27.3145	173.58	85.4967	5.062	18.1289	78.1725
GrgyjZ3629	2019-11-29	202011	G3_5-G3_6-7	12	30	12.6	43.95	378	1319	77.7188	GrgyjZ3629	0	1	0	0	0	8.77	250	1112	1118.2	1115.1	5.2	3.4	0	0.6	40	4025	50	1	0.96482	5.68759	27.3145	173.58	85.4967	5.55102	19.3625	77.7188
GrgyjZ3629	2019-11-29	201912	G3_9-G3_15	1	4	3.52	51.61	14	206	93.6151	GrgyjZ3629	0	1	0	0	0	8.77	250	1121.3	1140.2	1130.75	15.3	6.6	0	0.2	40	4932	50	1	0.624295	3.68021	17.6741	112.316	85.4967	1.00343	14.7123	93.6151
GrgyjZ3629	2019-11-29	202001	G3_9-G3_15	2	31	5.85	72.57	181	2250	92.5402	GrgyjZ3629	0	1	0	0	0	8.77	250	1121.3	1140.2	1130.75	15.3	6.6	0	0.2	40	4932	50	1	0.624295	3.68021	17.6741	112.316	85.4967	1.66764	20.6873	92.5402
GrgyjZ3629	2019-11-29	202002	G3_9-G3_15	3	29	8.58	69.46	249	2014	89.0056	GrgyjZ3629	0	1	0	0	0	8.77	250	1121.3	1140.2	1130.75	15.3	6.6	0	0.2	40	4932	50	1	0.624295	3.68021	17.6741	112.316	85.4967	2.44587	19.8007	89.0056
GrgyjZ3629	2019-11-29	202003	G3_9-G3_15	4	31	9.38	60.75	291	1883	86.6248	GrgyjZ3629	0	1	0	0	0	8.77	250	1121.3	1140.2	1130.75	15.3	6.6	0	0.2	40	4932	50	1	0.624295	3.68021	17.6741	112.316	85.4967	2.67392	17.3178	86.6248
GrgyjZ3629	2019-11-29	202004	G3_9-G3_15	5	29.98	11.37	61.27	341	1837	84.3475	GrgyjZ3629	0	1	0	0	0	8.77	250	1121.3	1140.2	1130.75	15.3	6.6	0	0.2	40	4932	50	1	0.624295	3.68021	17.6741	112.316	85.4967	3.24121	17.466	84.3475
GrgyjZ3629	2019-11-29	202005	G3_9-G3_15	6	30.88	10.82	58.83	334	1816	84.4652	GrgyjZ3629	0	1	0	0	0	8.77	250	1121.3	1140.2	1130.75	15.3	6.6	0	0.2	40	4932	50	1	0.624295	3.68021	17.6741	112.316	85.4967	3.08442	16.7705	84.4652
GrgyjZ3629	2019-11-29	202006	G3_9-G3_15	7	29.92	11.68	50.73	349	1518	81.2851	GrgyjZ3629	0	1	0	0	0	8.77	250	1121.3	1140.2	1130.75	15.3	6.6	0	0.2	40	4932	50	1	0.624295	3.68021	17.6741	112.316	85.4967	3.32958	14.4614	81.2851
GrgyjZ3629	2019-11-29	202007	G3_9-G3_15	8	30.56	10.25	47.46	313	1450	82.2388	GrgyjZ3629	0	1	0	0	0	8.77	250	1121.3	1140.2	1130.75	15.3	6.6	0	0.2	40	4932	50	1	0.624295	3.68021	17.6741	112.316	85.4967	2.92193	13.5293	82.2388
GrgyjZ3629	2019-11-29	202008	G3_9-G3_15	9	29.98	8.84	47.62	265	1428	84.3429	GrgyjZ3629	0	1	0	0	0	8.77	250	1121.3	1140.2	1130.75	15.3	6.6	0	0.2	40	4932	50	1	0.624295	3.68021	17.6741	112.316	85.4967	2.51999	13.5749	84.3429
GrgyjZ3629	2019-11-29	202009	G3_9-G3_15	10	28.81	9.5	41.24	274	1186	81.2771	GrgyjZ3629	0	1	0	0	0	8.77	250	1121.3	1140.2	1130.75	15.3	6.6	0	0.2	40	4932	50	1	0.624295	3.68021	17.6741	112.316	85.4967	2.70813	11.7561	81.2771
GrgyjZ3629	2019-11-29	202010	G3_9-G3_15	11	31	11.49	41.15	356	1276	78.1725	GrgyjZ3629	0	1	0	0	0	8.77	250	1121.3	1140.2	1130.75	15.3	6.6	0	0.2	40	4932	50	1	0.624295	3.68021	17.6741	112.316	85.4967	3.27541	11.7305	78.1725
GrgyjZ3629	2019-11-29	202011	G3_9-G3_15	12	30	12.6	43.95	378	1319	77.7188	GrgyjZ3629	0	1	0	0	0	8.77	250	1121.3	1140.2	1130.75	15.3	6.6	0	0.2	40	4932	50	1	0.624295	3.68021	17.6741	112.316	85.4967	3.59184	12.5287	77.7188
GrgyjZ3629	2019-11-29	201912	G3_17-G3_23	1	4	3.52	51.61	14	206	93.6151	GrgyjZ3629	0	1	0	0	0	8.77	250	1143.1	1163.1	1153.1	11.4	3.9	0	0.295	40	4327	50	1	0.54413	3.20764	15.4046	97.8937	85.4967	0.874584	12.8231	93.6151
GrgyjZ3629	2019-11-29	202001	G3_17-G3_23	2	31	5.85	72.57	181	2250	92.5402	GrgyjZ3629	0	1	0	0	0	8.77	250	1143.1	1163.1	1153.1	11.4	3.9	0	0.295	40	4327	50	1	0.54413	3.20764	15.4046	97.8937	85.4967	1.4535	18.0308	92.5402
GrgyjZ3629	2019-11-29	202002	G3_17-G3_23	3	29	8.58	69.46	249	2014	89.0056	GrgyjZ3629	0	1	0	0	0	8.77	250	1143.1	1163.1	1153.1	11.4	3.9	0	0.295	40	4327	50	1	0.54413	3.20764	15.4046	97.8937	85.4967	2.1318	17.2581	89.0056
GrgyjZ3629	2019-11-29	202003	G3_17-G3_23	4	31	9.38	60.75	291	1883	86.6248	GrgyjZ3629	0	1	0	0	0	8.77	250	1143.1	1163.1	1153.1	11.4	3.9	0	0.295	40	4327	50	1	0.54413	3.20764	15.4046	97.8937	85.4967	2.33057	15.094	86.6248
GrgyjZ3629	2019-11-29	202004	G3_17-G3_23	5	29.98	11.37	61.27	341	1837	84.3475	GrgyjZ3629	0	1	0	0	0	8.77	250	1143.1	1163.1	1153.1	11.4	3.9	0	0.295	40	4327	50	1	0.54413	3.20764	15.4046	97.8937	85.4967	2.825	15.2232	84.3475
GrgyjZ3629	2019-11-29	202005	G3_17-G3_23	6	30.88	10.82	58.83	334	1816	84.4652	GrgyjZ3629	0	1	0	0	0	8.77	250	1143.1	1163.1	1153.1	11.4	3.9	0	0.295	40	4327	50	1	0.54413	3.20764	15.4046	97.8937	85.4967	2.68835	14.617	84.4652
GrgyjZ3629	2019-11-29	202006	G3_17-G3_23	7	29.92	11.68	50.73	349	1518	81.2851	GrgyjZ3629	0	1	0	0	0	8.77	250	1143.1	1163.1	1153.1	11.4	3.9	0	0.295	40	4327	50	1	0.54413	3.20764	15.4046	97.8937	85.4967	2.90203	12.6044	81.2851
GrgyjZ3629	2019-11-29	202007	G3_17-G3_23	8	30.56	10.25	47.46	313	1450	82.2388	GrgyjZ3629	0	1	0	0	0	8.77	250	1143.1	1163.1	1153.1	11.4	3.9	0	0.295	40	4327	50	1	0.54413	3.20764	15.4046	97.8937	85.4967	2.54673	11.792	82.2388
GrgyjZ3629	2019-11-29	202008	G3_17-G3_23	9	29.98	8.84	47.62	265	1428	84.3429	GrgyjZ3629	0	1	0	0	0	8.77	250	1143.1	1163.1	1153.1	11.4	3.9	0	0.295	40	4327	50	1	0.54413	3.20764	15.4046	97.8937	85.4967	2.1964	11.8317	84.3429
GrgyjZ3629	2019-11-29	202009	G3_17-G3_23	10	28.81	9.5	41.24	274	1186	81.2771	GrgyjZ3629	0	1	0	0	0	8.77	250	1143.1	1163.1	1153.1	11.4	3.9	0	0.295	40	4327	50	1	0.54413	3.20764	15.4046	97.8937	85.4967	2.36038	10.2465	81.2771
GrgyjZ3629	2019-11-29	202010	G3_17-G3_23	11	31	11.49	41.15	356	1276	78.1725	GrgyjZ3629	0	1	0	0	0	8.77	250	1143.1	1163.1	1153.1	11.4	3.9	0	0.295	40	4327	50	1	0.54413	3.20764	15.4046	97.8937	85.4967	2.85482	10.2242	78.1725
GrgyjZ3629	2019-11-29	202011	G3_17-G3_23	12	30	12.6	43.95	378	1319	77.7188	GrgyjZ3629	0	1	0	0	0	8.77	250	1143.1	1163.1	1153.1	11.4	3.9	0	0.295	40	4327	50	1	0.54413	3.20764	15.4046	97.8937	85.4967	3.13061	10.9199	77.7188
GEovbL5095	2019-12-11	202001	S1_2-S1_4+5	1	31	2.68	64.77	83	2008	96.0267	GEovbL5095	0	1	0	0	0	7.3	250	899.4	911.6	905.5	5.4	2.7	30.5	0.23	0	0	0	1	1.47	39.24	44	1177	96.3891	2.68	64.77	96.0267
GEovbL5095	2019-12-11	202002	S1_2-S1_4+5	2	28.96	2.62	61.83	76	1791	95.9348	GEovbL5095	0	1	0	0	0	7.3	250	899.4	911.6	905.5	5.4	2.7	30.5	0.23	0	0	0	1	1.47	39.24	44	1177	96.3891	2.62	61.83	95.9348
GEovbL5095	2019-12-11	202003	S1_2-S1_4+5	3	30.81	2.61	64.5	80	1987	96.1109	GEovbL5095	0	1	0	0	0	7.3	250	899.4	911.6	905.5	5.4	2.7	30.5	0.23	0	0	0	1	1.47	39.24	44	1177	96.3891	2.61	64.5	96.1109
GEovbL5095	2019-12-11	202004	S1_2-S1_4+5	4	30	2.18	64.77	66	1943	96.7438	GEovbL5095	0	1	0	0	0	7.3	250	899.4	911.6	905.5	5.4	2.7	30.5	0.23	0	0	0	1	1.47	39.24	44	1177	96.3891	2.18	64.77	96.7438
GEovbL5095	2019-12-11	202005	S1_2-S1_4+5	5	31	2.4	58.95	74	1828	96.088	GEovbL5095	0	1	0	0	0	7.3	250	899.4	911.6	905.5	5.4	2.7	30.5	0.23	0	0	0	1	1.47	39.24	44	1177	96.3891	2.4	58.95	96.088
GEovbL5095	2019-12-11	202006	S1_2-S1_4+5	6	29.88	1.58	49.25	47	1471	96.8916	GEovbL5095	0	1	0	0	0	7.3	250	899.4	911.6	905.5	5.4	2.7	30.5	0.23	0	0	0	1	1.47	39.24	44	1177	96.3891	1.58	49.25	96.8916
GEovbL5095	2019-12-11	202007	S1_2-S1_4+5	7	30.81	1.55	44.98	48	1386	96.6688	GEovbL5095	0	1	0	0	0	7.3	250	899.4	911.6	905.5	5.4	2.7	30.5	0.23	0	0	0	1	1.47	39.24	44	1177	96.3891	1.55	44.98	96.6688
GEovbL5095	2019-12-11	202008	S1_2-S1_4+5	8	30.74	2.08	40.51	64	1245	95.1162	GEovbL5095	0	1	0	0	0	7.3	250	899.4	911.6	905.5	5.4	2.7	30.5	0.23	0	0	0	1	1.47	39.24	44	1177	96.3891	2.08	40.51	95.1162
GEovbL5095	2019-12-11	202009	S1_2-S1_4+5	9	29.98	1.53	39.88	46	1196	96.3052	GEovbL5095	0	1	0	0	0	7.3	250	899.4	911.6	905.5	5.4	2.7	30.5	0.23	0	0	0	1	1.47	39.24	44	1177	96.3891	1.53	39.88	96.3052
UWAGGa4470	2019-12-08	202001	SⅢ3-SⅢ4	1	30.9	4.67	81.07	144	2505	94.5533	UWAGGa4470	0	1	0	0	0	10.14	200	1003.2	1007.5	1005.35	2.9	0.9	30.8	0.23	33	87.64	14	1	0.511988	5.08559	14.2083	141.593	90.8534	1.14401	19.8598	94.5533
UWAGGa4470	2019-12-08	202002	SⅢ3-SⅢ4	2	28.77	5.28	77.03	152	2216	93.5852	UWAGGa4470	0	1	0	0	0	10.14	200	1003.2	1007.5	1005.35	2.9	0.9	30.8	0.23	33	87.64	14	1	0.511988	5.08559	14.2083	141.593	90.8534	1.29344	18.8701	93.5852
UWAGGa4470	2019-12-08	202003	SⅢ3-SⅢ4	3	30.99	5.55	77.63	172	2406	93.3277	UWAGGa4470	0	1	0	0	0	10.14	200	1003.2	1007.5	1005.35	2.9	0.9	30.8	0.23	33	87.64	14	1	0.511988	5.08559	14.2083	141.593	90.8534	1.35959	19.0171	93.3277
UWAGGa4470	2019-12-08	202004	SⅢ3-SⅢ4	4	30	5.33	78.65	160	2359	93.6533	UWAGGa4470	0	1	0	0	0	10.14	200	1003.2	1007.5	1005.35	2.9	0.9	30.8	0.23	33	87.64	14	1	0.511988	5.08559	14.2083	141.593	90.8534	1.30569	19.2669	93.6533
UWAGGa4470	2019-12-08	202005	SⅢ3-SⅢ4	5	29.93	6.85	107.32	205	3213	94.0002	UWAGGa4470	0	1	0	0	0	10.14	200	1003.2	1007.5	1005.35	2.9	0.9	30.8	0.23	33	87.64	14	1	0.511988	5.08559	14.2083	141.593	90.8534	1.67805	26.2902	94.0002
UWAGGa4470	2019-12-08	202006	SⅢ3-SⅢ4	6	29.94	6.61	115.99	198	3473	94.6085	UWAGGa4470	0	1	0	0	0	10.14	200	1003.2	1007.5	1005.35	2.9	0.9	30.8	0.23	33	87.64	14	1	0.511988	5.08559	14.2083	141.593	90.8534	1.61925	28.4141	94.6085
UWAGGa4470	2019-12-08	202007	SⅢ3-SⅢ4	7	30.41	5.28	116.27	161	3535	95.6561	UWAGGa4470	0	1	0	0	0	10.14	200	1003.2	1007.5	1005.35	2.9	0.9	30.8	0.23	33	87.64	14	1	0.511988	5.08559	14.2083	141.593	90.8534	1.29344	28.4827	95.6561
UWAGGa4470	2019-12-08	202008	SⅢ3-SⅢ4	8	30.59	5.21	115.03	159	3518	95.667	UWAGGa4470	0	1	0	0	0	10.14	200	1003.2	1007.5	1005.35	2.9	0.9	30.8	0.23	33	87.64	14	1	0.511988	5.08559	14.2083	141.593	90.8534	1.2763	28.1789	95.667
UWAGGa4470	2019-12-08	202009	SⅢ3-SⅢ4	9	29.46	5.46	118.47	161	3490	95.5943	UWAGGa4470	0	1	0	0	0	10.14	200	1003.2	1007.5	1005.35	2.9	0.9	30.8	0.23	33	87.64	14	1	0.511988	5.08559	14.2083	141.593	90.8534	1.33754	29.0216	95.5943
UWAGGa4470	2019-12-08	202010	SⅢ3-SⅢ4	10	30.76	5.22	115.72	161	3560	95.6838	UWAGGa4470	0	1	0	0	0	10.14	200	1003.2	1007.5	1005.35	2.9	0.9	30.8	0.23	33	87.64	14	1	0.511988	5.08559	14.2083	141.593	90.8534	1.27875	28.348	95.6838
UWAGGa4470	2019-12-08	202011	SⅢ3-SⅢ4	11	29.98	4.74	116.43	142	3491	96.0881	UWAGGa4470	0	1	0	0	0	10.14	200	1003.2	1007.5	1005.35	2.9	0.9	30.8	0.23	33	87.64	14	1	0.511988	5.08559	14.2083	141.593	90.8534	1.16116	28.5219	96.0881
UWAGGa4470	2019-12-08	202012	SⅢ3-SⅢ4	12	30.66	4.6	113.81	141	3490	96.1152	UWAGGa4470	0	1	0	0	0	10.14	200	1003.2	1007.5	1005.35	2.9	0.9	30.8	0.23	33	87.64	14	1	0.511988	5.08559	14.2083	141.593	90.8534	1.12686	27.8801	96.1152
UWAGGa4470	2019-12-08	202001	PⅡ1-PⅡ2	1	30.9	4.67	81.07	144	2505	94.5533	UWAGGa4470	0	1	0	0	0	10.14	200	1071.8	1074	1072.9	2.4	2.2	29.9	0.13	35	92.25	14	1	0.707385	7.02646	19.6308	195.631	90.8534	1.58062	27.4391	94.5533
UWAGGa4470	2019-12-08	202002	PⅡ1-PⅡ2	2	28.77	5.28	77.03	152	2216	93.5852	UWAGGa4470	0	1	0	0	0	10.14	200	1071.8	1074	1072.9	2.4	2.2	29.9	0.13	35	92.25	14	1	0.707385	7.02646	19.6308	195.631	90.8534	1.78708	26.0717	93.5852
UWAGGa4470	2019-12-08	202003	PⅡ1-PⅡ2	3	30.99	5.55	77.63	172	2406	93.3277	UWAGGa4470	0	1	0	0	0	10.14	200	1071.8	1074	1072.9	2.4	2.2	29.9	0.13	35	92.25	14	1	0.707385	7.02646	19.6308	195.631	90.8534	1.87846	26.2748	93.3277
UWAGGa4470	2019-12-08	202004	PⅡ1-PⅡ2	4	30	5.33	78.65	160	2359	93.6533	UWAGGa4470	0	1	0	0	0	10.14	200	1071.8	1074	1072.9	2.4	2.2	29.9	0.13	35	92.25	14	1	0.707385	7.02646	19.6308	195.631	90.8534	1.804	26.62	93.6533
UWAGGa4470	2019-12-08	202005	PⅡ1-PⅡ2	5	29.93	6.85	107.32	205	3213	94.0002	UWAGGa4470	0	1	0	0	0	10.14	200	1071.8	1074	1072.9	2.4	2.2	29.9	0.13	35	92.25	14	1	0.707385	7.02646	19.6308	195.631	90.8534	2.31846	36.3237	94.0002
UWAGGa4470	2019-12-08	202006	PⅡ1-PⅡ2	6	29.94	6.61	115.99	198	3473	94.6085	UWAGGa4470	0	1	0	0	0	10.14	200	1071.8	1074	1072.9	2.4	2.2	29.9	0.13	35	92.25	14	1	0.707385	7.02646	19.6308	195.631	90.8534	2.23723	39.2582	94.6085
UWAGGa4470	2019-12-08	202007	PⅡ1-PⅡ2	7	30.41	5.28	116.27	161	3535	95.6561	UWAGGa4470	0	1	0	0	0	10.14	200	1071.8	1074	1072.9	2.4	2.2	29.9	0.13	35	92.25	14	1	0.707385	7.02646	19.6308	195.631	90.8534	1.78708	39.3529	95.6561
UWAGGa4470	2019-12-08	202008	PⅡ1-PⅡ2	8	30.59	5.21	115.03	159	3518	95.667	UWAGGa4470	0	1	0	0	0	10.14	200	1071.8	1074	1072.9	2.4	2.2	29.9	0.13	35	92.25	14	1	0.707385	7.02646	19.6308	195.631	90.8534	1.76338	38.9332	95.667
UWAGGa4470	2019-12-08	202009	PⅡ1-PⅡ2	9	29.46	5.46	118.47	161	3490	95.5943	UWAGGa4470	0	1	0	0	0	10.14	200	1071.8	1074	1072.9	2.4	2.2	29.9	0.13	35	92.25	14	1	0.707385	7.02646	19.6308	195.631	90.8534	1.848	40.0975	95.5943
UWAGGa4470	2019-12-08	202010	PⅡ1-PⅡ2	10	30.76	5.22	115.72	161	3560	95.6838	UWAGGa4470	0	1	0	0	0	10.14	200	1071.8	1074	1072.9	2.4	2.2	29.9	0.13	35	92.25	14	1	0.707385	7.02646	19.6308	195.631	90.8534	1.76677	39.1668	95.6838
UWAGGa4470	2019-12-08	202011	PⅡ1-PⅡ2	11	29.98	4.74	116.43	142	3491	96.0881	UWAGGa4470	0	1	0	0	0	10.14	200	1071.8	1074	1072.9	2.4	2.2	29.9	0.13	35	92.25	14	1	0.707385	7.02646	19.6308	195.631	90.8534	1.60431	39.4071	96.0881
UWAGGa4470	2019-12-08	202012	PⅡ1-PⅡ2	12	30.66	4.6	113.81	141	3490	96.1152	UWAGGa4470	0	1	0	0	0	10.14	200	1071.8	1074	1072.9	2.4	2.2	29.9	0.13	35	92.25	14	1	0.707385	7.02646	19.6308	195.631	90.8534	1.55692	38.5203	96.1152
GrgyjZ3629	2019-12-01	202001	G2_29	1	31	5.85	72.57	181	2250	92.5402	GrgyjZ3629	0	1	0	0	0	8.77	250	1083.8	1086.3	1085.05	2.5	0.8	0	0.05	38	1814	37.5	1	0.0170176	0.108239	0.0863838	0.544218	86.4138	0.0505345	0.626887	92.5402
GrgyjZ3629	2019-12-01	202002	G2_29	2	29	8.58	69.46	249	2014	89.0056	GrgyjZ3629	0	1	0	0	0	8.77	250	1083.8	1086.3	1085.05	2.5	0.8	0	0.05	38	1814	37.5	1	0.0170176	0.108239	0.0863838	0.544218	86.4138	0.0741173	0.600022	89.0056
GrgyjZ3629	2019-12-01	202003	G2_29	3	31	9.38	60.75	291	1883	86.6248	GrgyjZ3629	0	1	0	0	0	8.77	250	1083.8	1086.3	1085.05	2.5	0.8	0	0.05	38	1814	37.5	1	0.0170176	0.108239	0.0863838	0.544218	86.4138	0.081028	0.524781	86.6248
GrgyjZ3629	2019-12-01	202004	G2_29	4	29.98	11.37	61.27	341	1837	84.3475	GrgyjZ3629	0	1	0	0	0	8.77	250	1083.8	1086.3	1085.05	2.5	0.8	0	0.05	38	1814	37.5	1	0.0170176	0.108239	0.0863838	0.544218	86.4138	0.0982183	0.529273	84.3475
GrgyjZ3629	2019-12-01	202005	G2_29	5	30.88	10.82	58.83	334	1816	84.4652	GrgyjZ3629	0	1	0	0	0	8.77	250	1083.8	1086.3	1085.05	2.5	0.8	0	0.05	38	1814	37.5	1	0.0170176	0.108239	0.0863838	0.544218	86.4138	0.0934672	0.508196	84.4652
GrgyjZ3629	2019-12-01	202006	G2_29	6	29.92	11.68	50.73	349	1518	81.2851	GrgyjZ3629	0	1	0	0	0	8.77	250	1083.8	1086.3	1085.05	2.5	0.8	0	0.05	38	1814	37.5	1	0.0170176	0.108239	0.0863838	0.544218	86.4138	0.100896	0.438225	81.2851
GrgyjZ3629	2019-12-01	202007	G2_29	7	30.56	10.25	47.46	313	1450	82.2388	GrgyjZ3629	0	1	0	0	0	8.77	250	1083.8	1086.3	1085.05	2.5	0.8	0	0.05	38	1814	37.5	1	0.0170176	0.108239	0.0863838	0.544218	86.4138	0.0885434	0.409977	82.2388
GrgyjZ3629	2019-12-01	202008	G2_29	8	29.98	8.84	47.62	265	1428	84.3429	GrgyjZ3629	0	1	0	0	0	8.77	250	1083.8	1086.3	1085.05	2.5	0.8	0	0.05	38	1814	37.5	1	0.0170176	0.108239	0.0863838	0.544218	86.4138	0.0763632	0.411359	84.3429
GrgyjZ3629	2019-12-01	202009	G2_29	9	28.81	9.5	41.24	274	1186	81.2771	GrgyjZ3629	0	1	0	0	0	8.77	250	1083.8	1086.3	1085.05	2.5	0.8	0	0.05	38	1814	37.5	1	0.0170176	0.108239	0.0863838	0.544218	86.4138	0.0820646	0.356247	81.2771
GrgyjZ3629	2019-12-01	202010	G2_29	10	31	11.49	41.15	356	1276	78.1725	GrgyjZ3629	0	1	0	0	0	8.77	250	1083.8	1086.3	1085.05	2.5	0.8	0	0.05	38	1814	37.5	1	0.0170176	0.108239	0.0863838	0.544218	86.4138	0.0992549	0.355469	78.1725
GrgyjZ3629	2019-12-01	202011	G2_29	11	30	12.6	43.95	378	1319	77.7188	GrgyjZ3629	0	1	0	0	0	8.77	250	1083.8	1086.3	1085.05	2.5	0.8	0	0.05	38	1814	37.5	1	0.0170176	0.108239	0.0863838	0.544218	86.4138	0.108844	0.379657	77.7188
GrgyjZ3629	2019-12-01	202012	G2_29	12	27.25	12.62	43.25	346	1181	77.4118	GrgyjZ3629	0	1	0	0	0	8.77	250	1083.8	1086.3	1085.05	2.5	0.8	0	0.05	38	1814	37.5	1	0.0170176	0.108239	0.0863838	0.544218	86.4138	0.109016	0.37361	77.4118
GrgyjZ3629	2019-12-01	202001	G2_31-G2_34	1	31	5.85	72.57	181	2250	92.5402	GrgyjZ3629	0	1	0	0	0	8.77	250	1091.6	1098	1094.8	3.4	1	0	0.08	45	1678	50	1	0.0340352	0.216478	0.172768	1.08844	86.4138	0.101069	1.25377	92.5402
GrgyjZ3629	2019-12-01	202002	G2_31-G2_34	2	29	8.58	69.46	249	2014	89.0056	GrgyjZ3629	0	1	0	0	0	8.77	250	1091.6	1098	1094.8	3.4	1	0	0.08	45	1678	50	1	0.0340352	0.216478	0.172768	1.08844	86.4138	0.148235	1.20004	89.0056
GrgyjZ3629	2019-12-01	202003	G2_31-G2_34	3	31	9.38	60.75	291	1883	86.6248	GrgyjZ3629	0	1	0	0	0	8.77	250	1091.6	1098	1094.8	3.4	1	0	0.08	45	1678	50	1	0.0340352	0.216478	0.172768	1.08844	86.4138	0.162056	1.04956	86.6248
GrgyjZ3629	2019-12-01	202004	G2_31-G2_34	4	29.98	11.37	61.27	341	1837	84.3475	GrgyjZ3629	0	1	0	0	0	8.77	250	1091.6	1098	1094.8	3.4	1	0	0.08	45	1678	50	1	0.0340352	0.216478	0.172768	1.08844	86.4138	0.196437	1.05855	84.3475
GrgyjZ3629	2019-12-01	202005	G2_31-G2_34	5	30.88	10.82	58.83	334	1816	84.4652	GrgyjZ3629	0	1	0	0	0	8.77	250	1091.6	1098	1094.8	3.4	1	0	0.08	45	1678	50	1	0.0340352	0.216478	0.172768	1.08844	86.4138	0.186934	1.01639	84.4652
GrgyjZ3629	2019-12-01	202006	G2_31-G2_34	6	29.92	11.68	50.73	349	1518	81.2851	GrgyjZ3629	0	1	0	0	0	8.77	250	1091.6	1098	1094.8	3.4	1	0	0.08	45	1678	50	1	0.0340352	0.216478	0.172768	1.08844	86.4138	0.201792	0.87645	81.2851
GrgyjZ3629	2019-12-01	202007	G2_31-G2_34	7	30.56	10.25	47.46	313	1450	82.2388	GrgyjZ3629	0	1	0	0	0	8.77	250	1091.6	1098	1094.8	3.4	1	0	0.08	45	1678	50	1	0.0340352	0.216478	0.172768	1.08844	86.4138	0.177087	0.819955	82.2388
GrgyjZ3629	2019-12-01	202008	G2_31-G2_34	8	29.98	8.84	47.62	265	1428	84.3429	GrgyjZ3629	0	1	0	0	0	8.77	250	1091.6	1098	1094.8	3.4	1	0	0.08	45	1678	50	1	0.0340352	0.216478	0.172768	1.08844	86.4138	0.152726	0.822719	84.3429
GrgyjZ3629	2019-12-01	202009	G2_31-G2_34	9	28.81	9.5	41.24	274	1186	81.2771	GrgyjZ3629	0	1	0	0	0	8.77	250	1091.6	1098	1094.8	3.4	1	0	0.08	45	1678	50	1	0.0340352	0.216478	0.172768	1.08844	86.4138	0.164129	0.712493	81.2771
GrgyjZ3629	2019-12-01	202010	G2_31-G2_34	10	31	11.49	41.15	356	1276	78.1725	GrgyjZ3629	0	1	0	0	0	8.77	250	1091.6	1098	1094.8	3.4	1	0	0.08	45	1678	50	1	0.0340352	0.216478	0.172768	1.08844	86.4138	0.19851	0.710938	78.1725
GrgyjZ3629	2019-12-01	202011	G2_31-G2_34	11	30	12.6	43.95	378	1319	77.7188	GrgyjZ3629	0	1	0	0	0	8.77	250	1091.6	1098	1094.8	3.4	1	0	0.08	45	1678	50	1	0.0340352	0.216478	0.172768	1.08844	86.4138	0.217687	0.759313	77.7188
GrgyjZ3629	2019-12-01	202012	G2_31-G2_34	12	27.25	12.62	43.25	346	1181	77.4118	GrgyjZ3629	0	1	0	0	0	8.77	250	1091.6	1098	1094.8	3.4	1	0	0.08	45	1678	50	1	0.0340352	0.216478	0.172768	1.08844	86.4138	0.218033	0.74722	77.4118
DQNNa769f0	2019-12-02	202003	G1_6+7-9	1	28	7.31	74.8	205	2094	91.0973	DQNNa769f0	0	1	0	0	0	11.73	150	1152.6	1159.3	1155.95	3	0.8	25.4	0.063	46	2943	50	1	0.124475	2.56027	0.732203	12.6915	95.3636	1.78414	18.2563	91.0973
DQNNa769f0	2019-12-02	202004	G1_6+7-9	2	29.97	7.56	60.17	227	1804	88.838	DQNNa769f0	0	1	0	0	0	11.73	150	1152.6	1159.3	1155.95	3	0.8	25.4	0.063	46	2943	50	1	0.124475	2.56027	0.732203	12.6915	95.3636	1.84515	14.6856	88.838
DQNNa769f0	2019-12-02	202005	G1_6+7-9	3	30.91	6.88	58.7	213	1814	89.509	DQNNa769f0	0	1	0	0	0	11.73	150	1152.6	1159.3	1155.95	3	0.8	25.4	0.063	46	2943	50	1	0.124475	2.56027	0.732203	12.6915	95.3636	1.67919	14.3268	89.509
DQNNa769f0	2019-12-02	202006	G1_6+7-9	4	29.99	5.95	46.6	178	1397	88.6775	DQNNa769f0	0	1	0	0	0	11.73	150	1152.6	1159.3	1155.95	3	0.8	25.4	0.063	46	2943	50	1	0.124475	2.56027	0.732203	12.6915	95.3636	1.4522	11.3736	88.6775
DQNNa769f0	2019-12-02	202007	G1_6+7-9	5	31	4.37	30.73	136	953	87.5499	DQNNa769f0	0	1	0	0	0	11.73	150	1152.6	1159.3	1155.95	3	0.8	25.4	0.063	46	2943	50	1	0.124475	2.56027	0.732203	12.6915	95.3636	1.06658	7.5002	87.5499
DQNNa769f0	2019-12-02	202008	G1_6+7-9	6	27.92	3.35	17.55	93	490	83.9713	DQNNa769f0	0	1	0	0	0	11.73	150	1152.6	1159.3	1155.95	3	0.8	25.4	0.063	46	2943	50	1	0.124475	2.56027	0.732203	12.6915	95.3636	0.817627	4.28339	83.9713
DQNNa769f0	2019-12-02	202009	G1_6+7-9	7	29.99	3.63	18.05	109	541	83.2565	DQNNa769f0	0	1	0	0	0	11.73	150	1152.6	1159.3	1155.95	3	0.8	25.4	0.063	46	2943	50	1	0.124475	2.56027	0.732203	12.6915	95.3636	0.885966	4.40542	83.2565
DQNNa769f0	2019-12-02	202010	G1_6+7-9	8	30.9	3.63	19.17	112	592	84.0789	DQNNa769f0	0	1	0	0	0	11.73	150	1152.6	1159.3	1155.95	3	0.8	25.4	0.063	46	2943	50	1	0.124475	2.56027	0.732203	12.6915	95.3636	0.885966	4.67878	84.0789
DQNNa769f0	2019-12-02	202011	G1_6+7-9	9	29.71	4.27	20.37	127	605	82.6705	DQNNa769f0	0	1	0	0	0	11.73	150	1152.6	1159.3	1155.95	3	0.8	25.4	0.063	46	2943	50	1	0.124475	2.56027	0.732203	12.6915	95.3636	1.04217	4.97166	82.6705
DQNNa769f0	2019-12-02	202012	G1_6+7-9	10	30.96	4.08	19.98	126	619	83.0424	DQNNa769f0	0	1	0	0	0	11.73	150	1152.6	1159.3	1155.95	3	0.8	25.4	0.063	46	2943	50	1	0.124475	2.56027	0.732203	12.6915	95.3636	0.995797	4.87647	83.0424
DQNNa769f0	2019-12-02	202003	G1_10-14	1	28	7.31	74.8	205	2094	91.0973	DQNNa769f0	0	1	0	0	0	11.73	150	1162.1	1175	1168.55	2.5	0.5	25.2	0.063	47	2216	40	1	0.0777966	1.60017	0.457627	7.9322	95.3636	1.11508	11.4102	91.0973
DQNNa769f0	2019-12-02	202004	G1_10-14	2	29.97	7.56	60.17	227	1804	88.838	DQNNa769f0	0	1	0	0	0	11.73	150	1162.1	1175	1168.55	2.5	0.5	25.2	0.063	47	2216	40	1	0.0777966	1.60017	0.457627	7.9322	95.3636	1.15322	9.17847	88.838
DQNNa769f0	2019-12-02	202005	G1_10-14	3	30.91	6.88	58.7	213	1814	89.509	DQNNa769f0	0	1	0	0	0	11.73	150	1162.1	1175	1168.55	2.5	0.5	25.2	0.063	47	2216	40	1	0.0777966	1.60017	0.457627	7.9322	95.3636	1.04949	8.95424	89.509
DQNNa769f0	2019-12-02	202006	G1_10-14	4	29.99	5.95	46.6	178	1397	88.6775	DQNNa769f0	0	1	0	0	0	11.73	150	1162.1	1175	1168.55	2.5	0.5	25.2	0.063	47	2216	40	1	0.0777966	1.60017	0.457627	7.9322	95.3636	0.907627	7.10847	88.6775
DQNNa769f0	2019-12-02	202007	G1_10-14	5	31	4.37	30.73	136	953	87.5499	DQNNa769f0	0	1	0	0	0	11.73	150	1162.1	1175	1168.55	2.5	0.5	25.2	0.063	47	2216	40	1	0.0777966	1.60017	0.457627	7.9322	95.3636	0.66661	4.68763	87.5499
DQNNa769f0	2019-12-02	202008	G1_10-14	6	27.92	3.35	17.55	93	490	83.9713	DQNNa769f0	0	1	0	0	0	11.73	150	1162.1	1175	1168.55	2.5	0.5	25.2	0.063	47	2216	40	1	0.0777966	1.60017	0.457627	7.9322	95.3636	0.511017	2.67712	83.9713
DQNNa769f0	2019-12-02	202009	G1_10-14	7	29.99	3.63	18.05	109	541	83.2565	DQNNa769f0	0	1	0	0	0	11.73	150	1162.1	1175	1168.55	2.5	0.5	25.2	0.063	47	2216	40	1	0.0777966	1.60017	0.457627	7.9322	95.3636	0.553729	2.75339	83.2565
DQNNa769f0	2019-12-02	202010	G1_10-14	8	30.9	3.63	19.17	112	592	84.0789	DQNNa769f0	0	1	0	0	0	11.73	150	1162.1	1175	1168.55	2.5	0.5	25.2	0.063	47	2216	40	1	0.0777966	1.60017	0.457627	7.9322	95.3636	0.553729	2.92424	84.0789
DQNNa769f0	2019-12-02	202011	G1_10-14	9	29.71	4.27	20.37	127	605	82.6705	DQNNa769f0	0	1	0	0	0	11.73	150	1162.1	1175	1168.55	2.5	0.5	25.2	0.063	47	2216	40	1	0.0777966	1.60017	0.457627	7.9322	95.3636	0.651356	3.10729	82.6705
DQNNa769f0	2019-12-02	202012	G1_10-14	10	30.96	4.08	19.98	126	619	83.0424	DQNNa769f0	0	1	0	0	0	11.73	150	1162.1	1175	1168.55	2.5	0.5	25.2	0.063	47	2216	40	1	0.0777966	1.60017	0.457627	7.9322	95.3636	0.622373	3.0478	83.0424
DQNNa769f0	2019-12-02	202003	G1_16-20	1	28	7.31	74.8	205	2094	91.0973	DQNNa769f0	0	1	0	0	0	11.73	150	1179	1190.4	1184.7	1.7	0.9	27	0.104	51	3465	50	1	0.231167	4.75479	1.35981	23.57	95.3636	3.31339	33.9045	91.0973
DQNNa769f0	2019-12-02	202004	G1_16-20	2	29.97	7.56	60.17	227	1804	88.838	DQNNa769f0	0	1	0	0	0	11.73	150	1179	1190.4	1184.7	1.7	0.9	27	0.104	51	3465	50	1	0.231167	4.75479	1.35981	23.57	95.3636	3.42671	27.2732	88.838
DQNNa769f0	2019-12-02	202005	G1_16-20	3	30.91	6.88	58.7	213	1814	89.509	DQNNa769f0	0	1	0	0	0	11.73	150	1179	1190.4	1184.7	1.7	0.9	27	0.104	51	3465	50	1	0.231167	4.75479	1.35981	23.57	95.3636	3.11849	26.6069	89.509
DQNNa769f0	2019-12-02	202006	G1_16-20	4	29.99	5.95	46.6	178	1397	88.6775	DQNNa769f0	0	1	0	0	0	11.73	150	1179	1190.4	1184.7	1.7	0.9	27	0.104	51	3465	50	1	0.231167	4.75479	1.35981	23.57	95.3636	2.69695	21.1223	88.6775
DQNNa769f0	2019-12-02	202007	G1_16-20	5	31	4.37	30.73	136	953	87.5499	DQNNa769f0	0	1	0	0	0	11.73	150	1179	1190.4	1184.7	1.7	0.9	27	0.104	51	3465	50	1	0.231167	4.75479	1.35981	23.57	95.3636	1.98078	13.9289	87.5499
DQNNa769f0	2019-12-02	202008	G1_16-20	6	27.92	3.35	17.55	93	490	83.9713	DQNNa769f0	0	1	0	0	0	11.73	150	1179	1190.4	1184.7	1.7	0.9	27	0.104	51	3465	50	1	0.231167	4.75479	1.35981	23.57	95.3636	1.51845	7.95487	83.9713
DQNNa769f0	2019-12-02	202009	G1_16-20	7	29.99	3.63	18.05	109	541	83.2565	DQNNa769f0	0	1	0	0	0	11.73	150	1179	1190.4	1184.7	1.7	0.9	27	0.104	51	3465	50	1	0.231167	4.75479	1.35981	23.57	95.3636	1.64537	8.1815	83.2565
DQNNa769f0	2019-12-02	202010	G1_16-20	8	30.9	3.63	19.17	112	592	84.0789	DQNNa769f0	0	1	0	0	0	11.73	150	1179	1190.4	1184.7	1.7	0.9	27	0.104	51	3465	50	1	0.231167	4.75479	1.35981	23.57	95.3636	1.64537	8.68916	84.0789
DQNNa769f0	2019-12-02	202011	G1_16-20	9	29.71	4.27	20.37	127	605	82.6705	DQNNa769f0	0	1	0	0	0	11.73	150	1179	1190.4	1184.7	1.7	0.9	27	0.104	51	3465	50	1	0.231167	4.75479	1.35981	23.57	95.3636	1.93546	9.23308	82.6705
DQNNa769f0	2019-12-02	202012	G1_16-20	10	30.96	4.08	19.98	126	619	83.0424	DQNNa769f0	0	1	0	0	0	11.73	150	1179	1190.4	1184.7	1.7	0.9	27	0.104	51	3465	50	1	0.231167	4.75479	1.35981	23.57	95.3636	1.84934	9.05631	83.0424
DQNNa769f0	2019-12-02	202003	G2_1-3	1	28	7.31	74.8	205	2094	91.0973	DQNNa769f0	0	1	0	0	0	11.73	150	1193.5	1198.7	1196.1	1	0.5	24.5	0.062	51	1913	40	1	0.0765617	1.57477	0.450363	7.8063	95.3636	1.09738	11.2291	91.0973
DQNNa769f0	2019-12-02	202004	G2_1-3	2	29.97	7.56	60.17	227	1804	88.838	DQNNa769f0	0	1	0	0	0	11.73	150	1193.5	1198.7	1196.1	1	0.5	24.5	0.062	51	1913	40	1	0.0765617	1.57477	0.450363	7.8063	95.3636	1.13492	9.03278	88.838
DQNNa769f0	2019-12-02	202005	G2_1-3	3	30.91	6.88	58.7	213	1814	89.509	DQNNa769f0	0	1	0	0	0	11.73	150	1193.5	1198.7	1196.1	1	0.5	24.5	0.062	51	1913	40	1	0.0765617	1.57477	0.450363	7.8063	95.3636	1.03283	8.81211	89.509
DQNNa769f0	2019-12-02	202006	G2_1-3	4	29.99	5.95	46.6	178	1397	88.6775	DQNNa769f0	0	1	0	0	0	11.73	150	1193.5	1198.7	1196.1	1	0.5	24.5	0.062	51	1913	40	1	0.0765617	1.57477	0.450363	7.8063	95.3636	0.89322	6.99564	88.6775
DQNNa769f0	2019-12-02	202007	G2_1-3	5	31	4.37	30.73	136	953	87.5499	DQNNa769f0	0	1	0	0	0	11.73	150	1193.5	1198.7	1196.1	1	0.5	24.5	0.062	51	1913	40	1	0.0765617	1.57477	0.450363	7.8063	95.3636	0.656029	4.61322	87.5499
DQNNa769f0	2019-12-02	202008	G2_1-3	6	27.92	3.35	17.55	93	490	83.9713	DQNNa769f0	0	1	0	0	0	11.73	150	1193.5	1198.7	1196.1	1	0.5	24.5	0.062	51	1913	40	1	0.0765617	1.57477	0.450363	7.8063	95.3636	0.502906	2.63462	83.9713
DQNNa769f0	2019-12-02	202009	G2_1-3	7	29.99	3.63	18.05	109	541	83.2565	DQNNa769f0	0	1	0	0	0	11.73	150	1193.5	1198.7	1196.1	1	0.5	24.5	0.062	51	1913	40	1	0.0765617	1.57477	0.450363	7.8063	95.3636	0.544939	2.70969	83.2565
DQNNa769f0	2019-12-02	202010	G2_1-3	8	30.9	3.63	19.17	112	592	84.0789	DQNNa769f0	0	1	0	0	0	11.73	150	1193.5	1198.7	1196.1	1	0.5	24.5	0.062	51	1913	40	1	0.0765617	1.57477	0.450363	7.8063	95.3636	0.544939	2.87782	84.0789
DQNNa769f0	2019-12-02	202011	G2_1-3	9	29.71	4.27	20.37	127	605	82.6705	DQNNa769f0	0	1	0	0	0	11.73	150	1193.5	1198.7	1196.1	1	0.5	24.5	0.062	51	1913	40	1	0.0765617	1.57477	0.450363	7.8063	95.3636	0.641017	3.05797	82.6705
DQNNa769f0	2019-12-02	202012	G2_1-3	10	30.96	4.08	19.98	126	619	83.0424	DQNNa769f0	0	1	0	0	0	11.73	150	1193.5	1198.7	1196.1	1	0.5	24.5	0.062	51	1913	40	1	0.0765617	1.57477	0.450363	7.8063	95.3636	0.612494	2.99942	83.0424
UxzqbC1457	2020-01-08	202002	P2_5-6-P2_10	1	28.93	7.04	49.05	204	1419	87.4487	UxzqbC1457	0	1	0	0	0	8.97	250	921.7	936.2	928.95	9.1	5.5	28.5	0.12	28	171.48	27	2	0.60792	5.40301	18.8553	166.122	89.8864	2.28864	15.9457	87.4487
UxzqbC1457	2020-01-08	202003	P2_5-6-P2_10	2	30.9	6.94	44.53	214	1376	86.5164	UxzqbC1457	0	1	0	0	0	8.97	250	921.7	936.2	928.95	9.1	5.5	28.5	0.12	28	171.48	27	2	0.60792	5.40301	18.8553	166.122	89.8864	2.25613	14.4763	86.5164
UxzqbC1457	2020-01-08	202004	P2_5-6-P2_10	3	29.83	7.47	43.22	223	1290	85.2634	UxzqbC1457	0	1	0	0	0	8.97	250	921.7	936.2	928.95	9.1	5.5	28.5	0.12	28	171.48	27	2	0.60792	5.40301	18.8553	166.122	89.8864	2.42843	14.0504	85.2634
UxzqbC1457	2020-01-08	202005	P2_5-6-P2_10	4	30.59	5.82	45.68	198	1396	88.699	UxzqbC1457	0	1	0	0	0	8.97	250	921.7	936.2	928.95	9.1	5.5	28.5	0.12	28	171.48	27	2	0.60792	5.40301	18.8553	166.122	89.8864	1.89203	14.8502	88.699
UxzqbC1457	2020-01-08	202006	P2_5-6-P2_10	5	29.94	6.89	50.41	206	1509	87.9756	UxzqbC1457	0	1	0	0	0	8.97	250	921.7	936.2	928.95	9.1	5.5	28.5	0.12	28	171.48	27	2	0.60792	5.40301	18.8553	166.122	89.8864	2.23988	16.3878	87.9756
UxzqbC1457	2020-01-08	202007	P2_5-6-P2_10	6	30.6	6.05	50.38	185	1542	89.2788	UxzqbC1457	0	1	0	0	0	8.97	250	921.7	936.2	928.95	9.1	5.5	28.5	0.12	28	171.48	27	2	0.60792	5.40301	18.8553	166.122	89.8864	1.9668	16.3781	89.2788
UxzqbC1457	2020-01-08	202008	P2_5-6-P2_10	7	29.7	7.28	51.25	216	1522	87.5619	UxzqbC1457	0	1	0	0	0	8.97	250	921.7	936.2	928.95	9.1	5.5	28.5	0.12	28	171.48	27	2	0.60792	5.40301	18.8553	166.122	89.8864	2.36666	16.6609	87.5619
UxzqbC1457	2020-01-08	202009	P2_5-6-P2_10	8	29.92	7.68	44.97	230	1343	85.4131	UxzqbC1457	0	1	0	0	0	8.97	250	921.7	936.2	928.95	9.1	5.5	28.5	0.12	28	171.48	27	2	0.60792	5.40301	18.8553	166.122	89.8864	2.4967	14.6193	85.4131
UxzqbC1457	2020-01-08	202010	P2_5-6-P2_10	9	30.75	7.46	42.92	229	1320	85.1925	UxzqbC1457	0	1	0	0	0	8.97	250	921.7	936.2	928.95	9.1	5.5	28.5	0.12	28	171.48	27	2	0.60792	5.40301	18.8553	166.122	89.8864	2.42518	13.9529	85.1925
UxzqbC1457	2020-01-08	202011	P2_5-6-P2_10	10	29.92	6.94	43.66	208	1307	86.2846	UxzqbC1457	0	1	0	0	0	8.97	250	921.7	936.2	928.95	9.1	5.5	28.5	0.12	28	171.48	27	2	0.60792	5.40301	18.8553	166.122	89.8864	2.25613	14.1935	86.2846
UxzqbC1457	2020-01-08	202012	P2_5-6-P2_10	11	30.82	6.59	44.46	203	1370	87.0911	UxzqbC1457	0	1	0	0	0	8.97	250	921.7	936.2	928.95	9.1	5.5	28.5	0.12	28	171.48	27	2	0.60792	5.40301	18.8553	166.122	89.8864	2.14235	14.4536	87.0911
UxzqbC1457	2020-01-08	202101	P2_5-6-P2_10	12	30.91	5.75	44.87	177	1387	88.6409	UxzqbC1457	0	1	0	0	0	8.97	250	921.7	936.2	928.95	9.1	5.5	28.5	0.12	28	171.48	27	2	0.60792	5.40301	18.8553	166.122	89.8864	1.86927	14.5868	88.6409
DQJUDCxLkl	2020-05-04	202006	SⅡ14,15+16-15+16	1	30	1.13	20.63	34	619	94.807	DQJUDCxLkl	0	1	0	0	0	10.14	250	1023.1	1031.8	1027.45	7.6	3.1	29.7	0.417	37	158.88	25	2	0.0957929	6.11058	2.52087	170.915	98.4565	0.569716	10.4011	94.807
DQJUDCxLkl	2020-05-04	202007	SⅡ14,15+16-15+16	2	28.1	0.93	26.03	26	732	96.5504	DQJUDCxLkl	0	1	0	0	0	10.14	250	1023.1	1031.8	1027.45	7.6	3.1	29.7	0.417	37	158.88	25	2	0.0957929	6.11058	2.52087	170.915	98.4565	0.468881	13.1236	96.5504
DQJUDCxLkl	2020-05-04	202008	SⅡ14,15+16-15+16	3	31	0.46	33.03	14	1024	98.6265	DQJUDCxLkl	0	1	0	0	0	10.14	250	1023.1	1031.8	1027.45	7.6	3.1	29.7	0.417	37	158.88	25	2	0.0957929	6.11058	2.52087	170.915	98.4565	0.23192	16.6528	98.6265
DQJUDCxLkl	2020-05-04	202009	SⅡ14,15+16-15+16	4	29.84	1.45	30.09	43	898	95.4027	DQJUDCxLkl	0	1	0	0	0	10.14	250	1023.1	1031.8	1027.45	7.6	3.1	29.7	0.417	37	158.88	25	2	0.0957929	6.11058	2.52087	170.915	98.4565	0.731051	15.1706	95.4027
DQJUDCxLkl	2020-05-04	202010	SⅡ14,15+16-15+16	5	31	0.92	30.67	29	951	97.0877	DQJUDCxLkl	0	1	0	0	0	10.14	250	1023.1	1031.8	1027.45	7.6	3.1	29.7	0.417	37	158.88	25	2	0.0957929	6.11058	2.52087	170.915	98.4565	0.463839	15.463	97.0877
DQJUDCxLkl	2020-05-04	202011	SⅡ14,15+16-15+16	6	30	0.45	23.65	14	709	98.1328	DQJUDCxLkl	0	1	0	0	0	10.14	250	1023.1	1031.8	1027.45	7.6	3.1	29.7	0.417	37	158.88	25	2	0.0957929	6.11058	2.52087	170.915	98.4565	0.226878	11.9237	98.1328
DQJUDCxLkl	2020-05-04	202012	SⅡ14,15+16-15+16	7	31	0.39	18.27	12	566	97.91	DQJUDCxLkl	0	1	0	0	0	10.14	250	1023.1	1031.8	1027.45	7.6	3.1	29.7	0.417	37	158.88	25	2	0.0957929	6.11058	2.52087	170.915	98.4565	0.196628	9.21124	97.91
DQJUDCxLkl	2020-05-04	202101	SⅡ14,15+16-15+16	8	30.96	0.66	16.69	20	517	96.196	DQJUDCxLkl	0	1	0	0	0	10.14	250	1023.1	1031.8	1027.45	7.6	3.1	29.7	0.417	37	158.88	25	2	0.0957929	6.11058	2.52087	170.915	98.4565	0.332754	8.41465	96.196
DQJUDCxLkl	2020-05-04	202102	SⅡ14,15+16-15+16	9	28	0.55	17.02	15	477	96.8697	DQJUDCxLkl	0	1	0	0	0	10.14	250	1023.1	1031.8	1027.45	7.6	3.1	29.7	0.417	37	158.88	25	2	0.0957929	6.11058	2.52087	170.915	98.4565	0.277295	8.58103	96.8697
DQJUDCxLkl	2020-05-04	202103	SⅡ14,15+16-15+16	10	31	0.46	18.82	14	584	97.6141	DQJUDCxLkl	0	1	0	0	0	10.14	250	1023.1	1031.8	1027.45	7.6	3.1	29.7	0.417	37	158.88	25	2	0.0957929	6.11058	2.52087	170.915	98.4565	0.23192	9.48854	97.6141
DQJUDCxLkl	2020-05-04	202104	SⅡ14,15+16-15+16	11	30	0.5	16.45	15	494	97.0501	DQJUDCxLkl	0	1	0	0	0	10.14	250	1023.1	1031.8	1027.45	7.6	3.1	29.7	0.417	37	158.88	25	2	0.0957929	6.11058	2.52087	170.915	98.4565	0.252087	8.29365	97.0501
DQJUDCxLkl	2020-05-04	202105	SⅡ14,15+16-15+16	12	31	0.49	15.2	15	471	96.877	DQJUDCxLkl	0	1	0	0	0	10.14	250	1023.1	1031.8	1027.45	7.6	3.1	29.7	0.417	37	158.88	25	2	0.0957929	6.11058	2.52087	170.915	98.4565	0.247045	7.66343	96.877
OHNYjG6697	2020-05-19	202006	S1_1-S1_3	1	22.71	15.86	74.56	360	1693	82.4596	OHNYjG6697	0	1	0	0	0	8.23	250	811.9	821.3	816.6	3.7	1.3	29.5	0.1	37	103.5	16	1	0.331672	4.81877	9.91202	144.487	93.5603	3.02317	14.2123	82.4596
OHNYjG6697	2020-05-19	202007	S1_1-S1_3	2	31	13.23	68.53	410	2125	83.8185	OHNYjG6697	0	1	0	0	0	8.23	250	811.9	821.3	816.6	3.7	1.3	29.5	0.1	37	103.5	16	1	0.331672	4.81877	9.91202	144.487	93.5603	2.52185	13.0629	83.8185
OHNYjG6697	2020-05-19	202008	S1_1-S1_3	3	31	9.43	68.4	292	2120	87.8838	OHNYjG6697	0	1	0	0	0	8.23	250	811.9	821.3	816.6	3.7	1.3	29.5	0.1	37	103.5	16	1	0.331672	4.81877	9.91202	144.487	93.5603	1.79751	13.0381	87.8838
OHNYjG6697	2020-05-19	202009	S1_1-S1_3	4	30	8.78	61.16	263	1835	87.4464	OHNYjG6697	0	1	0	0	0	8.23	250	811.9	821.3	816.6	3.7	1.3	29.5	0.1	37	103.5	16	1	0.331672	4.81877	9.91202	144.487	93.5603	1.67361	11.6581	87.4464
OHNYjG6697	2020-05-19	202010	S1_1-S1_3	5	30.92	9.08	61.58	281	1904	87.1497	OHNYjG6697	0	1	0	0	0	8.23	250	811.9	821.3	816.6	3.7	1.3	29.5	0.1	37	103.5	16	1	0.331672	4.81877	9.91202	144.487	93.5603	1.73079	11.7381	87.1497
OHNYjG6697	2020-05-19	202011	S1_1-S1_3	6	30	8.18	58.53	245	1756	87.738	OHNYjG6697	0	1	0	0	0	8.23	250	811.9	821.3	816.6	3.7	1.3	29.5	0.1	37	103.5	16	1	0.331672	4.81877	9.91202	144.487	93.5603	1.55924	11.1567	87.738
OHNYjG6697	2020-05-19	202012	S1_1-S1_3	7	31	7.78	56.22	241	1743	87.8438	OHNYjG6697	0	1	0	0	0	8.23	250	811.9	821.3	816.6	3.7	1.3	29.5	0.1	37	103.5	16	1	0.331672	4.81877	9.91202	144.487	93.5603	1.48299	10.7164	87.8438
OHNYjG6697	2020-05-19	202101	S1_1-S1_3	8	30.94	7.93	58.42	245	1808	88.0482	OHNYjG6697	0	1	0	0	0	8.23	250	811.9	821.3	816.6	3.7	1.3	29.5	0.1	37	103.5	16	1	0.331672	4.81877	9.91202	144.487	93.5603	1.51158	11.1358	88.0482
OHNYjG6697	2020-05-19	202102	S1_1-S1_3	9	28	8.38	58.09	235	1627	87.3928	OHNYjG6697	0	1	0	0	0	8.23	250	811.9	821.3	816.6	3.7	1.3	29.5	0.1	37	103.5	16	1	0.331672	4.81877	9.91202	144.487	93.5603	1.59736	11.0729	87.3928
OHNYjG6697	2020-05-19	202103	S1_1-S1_3	10	31	8.15	57.96	253	1797	87.6721	OHNYjG6697	0	1	0	0	0	8.23	250	811.9	821.3	816.6	3.7	1.3	29.5	0.1	37	103.5	16	1	0.331672	4.81877	9.91202	144.487	93.5603	1.55352	11.0481	87.6721
OHNYjG6697	2020-05-19	202104	S1_1-S1_3	11	29.54	8.7	62.99	257	1861	87.8644	OHNYjG6697	0	1	0	0	0	8.23	250	811.9	821.3	816.6	3.7	1.3	29.5	0.1	37	103.5	16	1	0.331672	4.81877	9.91202	144.487	93.5603	1.65836	12.0069	87.8644
OHNYjG6697	2020-05-19	202105	S1_1-S1_3	12	30.85	8.86	63.86	273	1970	87.8163	OHNYjG6697	0	1	0	0	0	8.23	250	811.9	821.3	816.6	3.7	1.3	29.5	0.1	37	103.5	16	1	0.331672	4.81877	9.91202	144.487	93.5603	1.68886	12.1727	87.8163
OHNYjG6697	2020-05-19	202006	P2_5-6-P2_6	1	22.71	15.86	74.56	360	1693	82.4596	OHNYjG6697	0	1	0	0	0	8.23	250	971.7	975.6	973.65	3.7	2.4	29.2	0.23	38	99	15	1	1.40833	20.4612	42.088	613.513	93.5603	12.8368	60.3477	82.4596
OHNYjG6697	2020-05-19	202007	P2_5-6-P2_6	2	31	13.23	68.53	410	2125	83.8185	OHNYjG6697	0	1	0	0	0	8.23	250	971.7	975.6	973.65	3.7	2.4	29.2	0.23	38	99	15	1	1.40833	20.4612	42.088	613.513	93.5603	10.7082	55.4671	83.8185
OHNYjG6697	2020-05-19	202008	P2_5-6-P2_6	3	31	9.43	68.4	292	2120	87.8838	OHNYjG6697	0	1	0	0	0	8.23	250	971.7	975.6	973.65	3.7	2.4	29.2	0.23	38	99	15	1	1.40833	20.4612	42.088	613.513	93.5603	7.63249	55.3619	87.8838
OHNYjG6697	2020-05-19	202009	P2_5-6-P2_6	4	30	8.78	61.16	263	1835	87.4464	OHNYjG6697	0	1	0	0	0	8.23	250	971.7	975.6	973.65	3.7	2.4	29.2	0.23	38	99	15	1	1.40833	20.4612	42.088	613.513	93.5603	7.10639	49.5019	87.4464
OHNYjG6697	2020-05-19	202010	P2_5-6-P2_6	5	30.92	9.08	61.58	281	1904	87.1497	OHNYjG6697	0	1	0	0	0	8.23	250	971.7	975.6	973.65	3.7	2.4	29.2	0.23	38	99	15	1	1.40833	20.4612	42.088	613.513	93.5603	7.34921	49.8419	87.1497
OHNYjG6697	2020-05-19	202011	P2_5-6-P2_6	6	30	8.18	58.53	245	1756	87.738	OHNYjG6697	0	1	0	0	0	8.23	250	971.7	975.6	973.65	3.7	2.4	29.2	0.23	38	99	15	1	1.40833	20.4612	42.088	613.513	93.5603	6.62076	47.3733	87.738
OHNYjG6697	2020-05-19	202012	P2_5-6-P2_6	7	31	7.78	56.22	241	1743	87.8438	OHNYjG6697	0	1	0	0	0	8.23	250	971.7	975.6	973.65	3.7	2.4	29.2	0.23	38	99	15	1	1.40833	20.4612	42.088	613.513	93.5603	6.29701	45.5036	87.8438
OHNYjG6697	2020-05-19	202101	P2_5-6-P2_6	8	30.94	7.93	58.42	245	1808	88.0482	OHNYjG6697	0	1	0	0	0	8.23	250	971.7	975.6	973.65	3.7	2.4	29.2	0.23	38	99	15	1	1.40833	20.4612	42.088	613.513	93.5603	6.41842	47.2842	88.0482
OHNYjG6697	2020-05-19	202102	P2_5-6-P2_6	9	28	8.38	58.09	235	1627	87.3928	OHNYjG6697	0	1	0	0	0	8.23	250	971.7	975.6	973.65	3.7	2.4	29.2	0.23	38	99	15	1	1.40833	20.4612	42.088	613.513	93.5603	6.78264	47.0171	87.3928
OHNYjG6697	2020-05-19	202103	P2_5-6-P2_6	10	31	8.15	57.96	253	1797	87.6721	OHNYjG6697	0	1	0	0	0	8.23	250	971.7	975.6	973.65	3.7	2.4	29.2	0.23	38	99	15	1	1.40833	20.4612	42.088	613.513	93.5603	6.59648	46.9119	87.6721
OHNYjG6697	2020-05-19	202104	P2_5-6-P2_6	11	29.54	8.7	62.99	257	1861	87.8644	OHNYjG6697	0	1	0	0	0	8.23	250	971.7	975.6	973.65	3.7	2.4	29.2	0.23	38	99	15	1	1.40833	20.4612	42.088	613.513	93.5603	7.04164	50.9831	87.8644
OHNYjG6697	2020-05-19	202105	P2_5-6-P2_6	12	30.85	8.86	63.86	273	1970	87.8163	OHNYjG6697	0	1	0	0	0	8.23	250	971.7	975.6	973.65	3.7	2.4	29.2	0.23	38	99	15	1	1.40833	20.4612	42.088	613.513	93.5603	7.17114	51.6873	87.8163
ucFwkL7402	2020-05-15	202006	S3_5+6-S3_8	1	29.54	3.97	62.59	117	1849	94.0355	ucFwkL7402	0	1	0	0	0	9.54	250	942.9	950.9	946.9	5.2	1.3	29.4	0.09	30	103.05	16	1	0.673947	10.8482	20.1842	325	94.1508	1.35816	21.4124	94.0355
ucFwkL7402	2020-05-15	202007	S3_5+6-S3_8	2	29.75	3.11	57.56	92	1712	94.8739	ucFwkL7402	0	1	0	0	0	9.54	250	942.9	950.9	946.9	5.2	1.3	29.4	0.09	30	103.05	16	1	0.673947	10.8482	20.1842	325	94.1508	1.06395	19.6916	94.8739
ucFwkL7402	2020-05-15	202008	S3_5+6-S3_8	3	30.94	3.44	46.57	107	1441	93.1214	ucFwkL7402	0	1	0	0	0	9.54	250	942.9	950.9	946.9	5.2	1.3	29.4	0.09	30	103.05	16	1	0.673947	10.8482	20.1842	325	94.1508	1.17684	15.9318	93.1214
ucFwkL7402	2020-05-15	202009	S3_5+6-S3_8	4	29.86	2.87	41.17	86	1229	93.4832	ucFwkL7402	0	1	0	0	0	9.54	250	942.9	950.9	946.9	5.2	1.3	29.4	0.09	30	103.05	16	1	0.673947	10.8482	20.1842	325	94.1508	0.981842	14.0845	93.4832
ucFwkL7402	2020-05-15	202010	S3_5+6-S3_8	5	28	3.23	45.8	90	1282	93.4122	ucFwkL7402	0	1	0	0	0	9.54	250	942.9	950.9	946.9	5.2	1.3	29.4	0.09	30	103.05	16	1	0.673947	10.8482	20.1842	325	94.1508	1.105	15.6684	93.4122
ucFwkL7402	2020-05-15	202011	S3_5+6-S3_8	6	30	3.51	47.9	105	1437	93.1725	ucFwkL7402	0	1	0	0	0	9.54	250	942.9	950.9	946.9	5.2	1.3	29.4	0.09	30	103.05	16	1	0.673947	10.8482	20.1842	325	94.1508	1.20079	16.3868	93.1725
ucFwkL7402	2020-05-15	202012	S3_5+6-S3_8	7	31	3.28	43.12	102	1337	92.931	ucFwkL7402	0	1	0	0	0	9.54	250	942.9	950.9	946.9	5.2	1.3	29.4	0.09	30	103.05	16	1	0.673947	10.8482	20.1842	325	94.1508	1.12211	14.7516	92.931
ucFwkL7402	2020-05-15	202101	S3_5+6-S3_8	8	31	3.1	47.2	96	1463	93.837	ucFwkL7402	0	1	0	0	0	9.54	250	942.9	950.9	946.9	5.2	1.3	29.4	0.09	30	103.05	16	1	0.673947	10.8482	20.1842	325	94.1508	1.06053	16.1474	93.837
ucFwkL7402	2020-05-15	202102	S3_5+6-S3_8	9	28	4.03	48.82	113	1367	92.3746	ucFwkL7402	0	1	0	0	0	9.54	250	942.9	950.9	946.9	5.2	1.3	29.4	0.09	30	103.05	16	1	0.673947	10.8482	20.1842	325	94.1508	1.37868	16.7016	92.3746
ucFwkL7402	2020-05-15	202103	S3_5+6-S3_8	10	30.77	4.31	50.36	133	1550	92.1163	ucFwkL7402	0	1	0	0	0	9.54	250	942.9	950.9	946.9	5.2	1.3	29.4	0.09	30	103.05	16	1	0.673947	10.8482	20.1842	325	94.1508	1.47447	17.2284	92.1163
ucFwkL7402	2020-05-15	202104	S3_5+6-S3_8	11	29.85	4.54	52.28	136	1561	92.0099	ucFwkL7402	0	1	0	0	0	9.54	250	942.9	950.9	946.9	5.2	1.3	29.4	0.09	30	103.05	16	1	0.673947	10.8482	20.1842	325	94.1508	1.55316	17.8853	92.0099
ucFwkL7402	2020-05-15	202105	S3_5+6-S3_8	12	30.78	4.92	48.05	151	1479	90.7117	ucFwkL7402	0	1	0	0	0	9.54	250	942.9	950.9	946.9	5.2	1.3	29.4	0.09	30	103.05	16	1	0.673947	10.8482	20.1842	325	94.1508	1.68316	16.4382	90.7117
ucFwkL7402	2020-05-15	202006	P2_10	1	29.54	3.97	62.59	117	1849	94.0355	ucFwkL7402	0	1	0	0	0	9.54	250	1025.6	1028.4	1027	2.3	0.9	29.7	0.25	33	103.5	16	1	1.29605	20.8618	38.8158	625	94.1508	2.61184	41.1776	94.0355
ucFwkL7402	2020-05-15	202007	P2_10	2	29.75	3.11	57.56	92	1712	94.8739	ucFwkL7402	0	1	0	0	0	9.54	250	1025.6	1028.4	1027	2.3	0.9	29.7	0.25	33	103.5	16	1	1.29605	20.8618	38.8158	625	94.1508	2.04605	37.8684	94.8739
ucFwkL7402	2020-05-15	202008	P2_10	3	30.94	3.44	46.57	107	1441	93.1214	ucFwkL7402	0	1	0	0	0	9.54	250	1025.6	1028.4	1027	2.3	0.9	29.7	0.25	33	103.5	16	1	1.29605	20.8618	38.8158	625	94.1508	2.26316	30.6382	93.1214
ucFwkL7402	2020-05-15	202009	P2_10	4	29.86	2.87	41.17	86	1229	93.4832	ucFwkL7402	0	1	0	0	0	9.54	250	1025.6	1028.4	1027	2.3	0.9	29.7	0.25	33	103.5	16	1	1.29605	20.8618	38.8158	625	94.1508	1.88816	27.0855	93.4832
ucFwkL7402	2020-05-15	202010	P2_10	5	28	3.23	45.8	90	1282	93.4122	ucFwkL7402	0	1	0	0	0	9.54	250	1025.6	1028.4	1027	2.3	0.9	29.7	0.25	33	103.5	16	1	1.29605	20.8618	38.8158	625	94.1508	2.125	30.1316	93.4122
ucFwkL7402	2020-05-15	202011	P2_10	6	30	3.51	47.9	105	1437	93.1725	ucFwkL7402	0	1	0	0	0	9.54	250	1025.6	1028.4	1027	2.3	0.9	29.7	0.25	33	103.5	16	1	1.29605	20.8618	38.8158	625	94.1508	2.30921	31.5132	93.1725
ucFwkL7402	2020-05-15	202012	P2_10	7	31	3.28	43.12	102	1337	92.931	ucFwkL7402	0	1	0	0	0	9.54	250	1025.6	1028.4	1027	2.3	0.9	29.7	0.25	33	103.5	16	1	1.29605	20.8618	38.8158	625	94.1508	2.15789	28.3684	92.931
ucFwkL7402	2020-05-15	202101	P2_10	8	31	3.1	47.2	96	1463	93.837	ucFwkL7402	0	1	0	0	0	9.54	250	1025.6	1028.4	1027	2.3	0.9	29.7	0.25	33	103.5	16	1	1.29605	20.8618	38.8158	625	94.1508	2.03947	31.0526	93.837
ucFwkL7402	2020-05-15	202102	P2_10	9	28	4.03	48.82	113	1367	92.3746	ucFwkL7402	0	1	0	0	0	9.54	250	1025.6	1028.4	1027	2.3	0.9	29.7	0.25	33	103.5	16	1	1.29605	20.8618	38.8158	625	94.1508	2.65132	32.1184	92.3746
ucFwkL7402	2020-05-15	202103	P2_10	10	30.77	4.31	50.36	133	1550	92.1163	ucFwkL7402	0	1	0	0	0	9.54	250	1025.6	1028.4	1027	2.3	0.9	29.7	0.25	33	103.5	16	1	1.29605	20.8618	38.8158	625	94.1508	2.83553	33.1316	92.1163
ucFwkL7402	2020-05-15	202104	P2_10	11	29.85	4.54	52.28	136	1561	92.0099	ucFwkL7402	0	1	0	0	0	9.54	250	1025.6	1028.4	1027	2.3	0.9	29.7	0.25	33	103.5	16	1	1.29605	20.8618	38.8158	625	94.1508	2.98684	34.3947	92.0099
ucFwkL7402	2020-05-15	202105	P2_10	12	30.78	4.92	48.05	151	1479	90.7117	ucFwkL7402	0	1	0	0	0	9.54	250	1025.6	1028.4	1027	2.3	0.9	29.7	0.25	33	103.5	16	1	1.29605	20.8618	38.8158	625	94.1508	3.23684	31.6118	90.7117
vaNUgw8146	2020-05-28	202006	S1_1	1	29.41	3.43	42.71	101	1256	92.5661	vaNUgw8146	0	1	0	0	0	9.41	250	863.2	864.8	864	2.4	1.1	29.2	0.09	25	115.14	18	1	0.0881576	1.32338	2.6346	39.3163	93.7545	0.347564	4.32783	92.5661
vaNUgw8146	2020-05-28	202007	S1_1	2	31	3.52	34.36	109	1065	90.7075	vaNUgw8146	0	1	0	0	0	9.41	250	863.2	864.8	864	2.4	1.1	29.2	0.09	25	115.14	18	1	0.0881576	1.32338	2.6346	39.3163	93.7545	0.356684	3.48172	90.7075
vaNUgw8146	2020-05-28	202008	S1_1	3	30.92	1.95	25.96	60	803	93.0133	vaNUgw8146	0	1	0	0	0	9.41	250	863.2	864.8	864	2.4	1.1	29.2	0.09	25	115.14	18	1	0.0881576	1.32338	2.6346	39.3163	93.7545	0.197595	2.63054	93.0133
vaNUgw8146	2020-05-28	202009	S1_1	4	30	1.41	20.87	42	626	93.6715	vaNUgw8146	0	1	0	0	0	9.41	250	863.2	864.8	864	2.4	1.1	29.2	0.09	25	115.14	18	1	0.0881576	1.32338	2.6346	39.3163	93.7545	0.142876	2.11477	93.6715
vaNUgw8146	2020-05-28	202010	S1_1	5	31	1.01	19.65	31	609	95.1113	vaNUgw8146	0	1	0	0	0	9.41	250	863.2	864.8	864	2.4	1.1	29.2	0.09	25	115.14	18	1	0.0881576	1.32338	2.6346	39.3163	93.7545	0.102344	1.99115	95.1113
vaNUgw8146	2020-05-28	202011	S1_1	6	29.83	1.04	16.87	31	503	94.1932	vaNUgw8146	0	1	0	0	0	9.41	250	863.2	864.8	864	2.4	1.1	29.2	0.09	25	115.14	18	1	0.0881576	1.32338	2.6346	39.3163	93.7545	0.105384	1.70945	94.1932
vaNUgw8146	2020-05-28	202101	S1_1	7	30.97	1.07	14.28	33	442	93.0293	vaNUgw8146	0	1	0	0	0	9.41	250	863.2	864.8	864	2.4	1.1	29.2	0.09	25	115.14	18	1	0.0881576	1.32338	2.6346	39.3163	93.7545	0.108424	1.447	93.0293
vaNUgw8146	2020-05-28	202102	S1_1	8	28	1	13.5	28	378	93.1034	vaNUgw8146	0	1	0	0	0	9.41	250	863.2	864.8	864	2.4	1.1	29.2	0.09	25	115.14	18	1	0.0881576	1.32338	2.6346	39.3163	93.7545	0.101331	1.36796	93.1034
vaNUgw8146	2020-05-28	202006	S1_2-S1_4+5	1	29.41	3.43	42.71	101	1256	92.5661	vaNUgw8146	0	1	0	0	0	9.41	250	868	876.5	872.25	3.1	1.8	30.5	0.26	25	121.05	19	1	0.416745	6.25597	12.4545	185.859	93.7545	1.64303	20.4588	92.5661
vaNUgw8146	2020-05-28	202007	S1_2-S1_4+5	2	31	3.52	34.36	109	1065	90.7075	vaNUgw8146	0	1	0	0	0	9.41	250	868	876.5	872.25	3.1	1.8	30.5	0.26	25	121.05	19	1	0.416745	6.25597	12.4545	185.859	93.7545	1.68614	16.459	90.7075
vaNUgw8146	2020-05-28	202008	S1_2-S1_4+5	3	30.92	1.95	25.96	60	803	93.0133	vaNUgw8146	0	1	0	0	0	9.41	250	868	876.5	872.25	3.1	1.8	30.5	0.26	25	121.05	19	1	0.416745	6.25597	12.4545	185.859	93.7545	0.934084	12.4353	93.0133
vaNUgw8146	2020-05-28	202009	S1_2-S1_4+5	4	30	1.41	20.87	42	626	93.6715	vaNUgw8146	0	1	0	0	0	9.41	250	868	876.5	872.25	3.1	1.8	30.5	0.26	25	121.05	19	1	0.416745	6.25597	12.4545	185.859	93.7545	0.675415	9.99709	93.6715
vaNUgw8146	2020-05-28	202010	S1_2-S1_4+5	5	31	1.01	19.65	31	609	95.1113	vaNUgw8146	0	1	0	0	0	9.41	250	868	876.5	872.25	3.1	1.8	30.5	0.26	25	121.05	19	1	0.416745	6.25597	12.4545	185.859	93.7545	0.483808	9.41269	95.1113
vaNUgw8146	2020-05-28	202011	S1_2-S1_4+5	6	29.83	1.04	16.87	31	503	94.1932	vaNUgw8146	0	1	0	0	0	9.41	250	868	876.5	872.25	3.1	1.8	30.5	0.26	25	121.05	19	1	0.416745	6.25597	12.4545	185.859	93.7545	0.498178	8.08102	94.1932
vaNUgw8146	2020-05-28	202101	S1_2-S1_4+5	7	30.97	1.07	14.28	33	442	93.0293	vaNUgw8146	0	1	0	0	0	9.41	250	868	876.5	872.25	3.1	1.8	30.5	0.26	25	121.05	19	1	0.416745	6.25597	12.4545	185.859	93.7545	0.512549	6.84037	93.0293
vaNUgw8146	2020-05-28	202102	S1_2-S1_4+5	8	28	1	13.5	28	378	93.1034	vaNUgw8146	0	1	0	0	0	9.41	250	868	876.5	872.25	3.1	1.8	30.5	0.26	25	121.05	19	1	0.416745	6.25597	12.4545	185.859	93.7545	0.479017	6.46673	93.1034
vaNUgw8146	2020-05-28	202006	P2_5-P2_8	1	29.41	3.43	42.71	101	1256	92.5661	vaNUgw8146	0	1	0	0	0	9.41	250	1024.3	1031.1	1027.7	4.2	1.5	27.8	0.18	38	121.95	19	1	0.24043	3.60921	7.18526	107.226	93.7545	0.947902	11.8032	92.5661
vaNUgw8146	2020-05-28	202007	P2_5-P2_8	2	31	3.52	34.36	109	1065	90.7075	vaNUgw8146	0	1	0	0	0	9.41	250	1024.3	1031.1	1027.7	4.2	1.5	27.8	0.18	38	121.95	19	1	0.24043	3.60921	7.18526	107.226	93.7545	0.972774	9.4956	90.7075
vaNUgw8146	2020-05-28	202008	P2_5-P2_8	3	30.92	1.95	25.96	60	803	93.0133	vaNUgw8146	0	1	0	0	0	9.41	250	1024.3	1031.1	1027.7	4.2	1.5	27.8	0.18	38	121.95	19	1	0.24043	3.60921	7.18526	107.226	93.7545	0.538895	7.17421	93.0133
vaNUgw8146	2020-05-28	202009	P2_5-P2_8	4	30	1.41	20.87	42	626	93.6715	vaNUgw8146	0	1	0	0	0	9.41	250	1024.3	1031.1	1027.7	4.2	1.5	27.8	0.18	38	121.95	19	1	0.24043	3.60921	7.18526	107.226	93.7545	0.389662	5.76755	93.6715
vaNUgw8146	2020-05-28	202010	P2_5-P2_8	5	31	1.01	19.65	31	609	95.1113	vaNUgw8146	0	1	0	0	0	9.41	250	1024.3	1031.1	1027.7	4.2	1.5	27.8	0.18	38	121.95	19	1	0.24043	3.60921	7.18526	107.226	93.7545	0.27912	5.4304	95.1113
vaNUgw8146	2020-05-28	202011	P2_5-P2_8	6	29.83	1.04	16.87	31	503	94.1932	vaNUgw8146	0	1	0	0	0	9.41	250	1024.3	1031.1	1027.7	4.2	1.5	27.8	0.18	38	121.95	19	1	0.24043	3.60921	7.18526	107.226	93.7545	0.28741	4.66213	94.1932
vaNUgw8146	2020-05-28	202101	P2_5-P2_8	7	30.97	1.07	14.28	33	442	93.0293	vaNUgw8146	0	1	0	0	0	9.41	250	1024.3	1031.1	1027.7	4.2	1.5	27.8	0.18	38	121.95	19	1	0.24043	3.60921	7.18526	107.226	93.7545	0.295701	3.94637	93.0293
vaNUgw8146	2020-05-28	202102	P2_5-P2_8	8	28	1	13.5	28	378	93.1034	vaNUgw8146	0	1	0	0	0	9.41	250	1024.3	1031.1	1027.7	4.2	1.5	27.8	0.18	38	121.95	19	1	0.24043	3.60921	7.18526	107.226	93.7545	0.276356	3.73081	93.1034
vaNUgw8146	2020-05-28	202006	P2_10	1	29.41	3.43	42.71	101	1256	92.5661	vaNUgw8146	0	1	0	0	0	9.41	250	1037.4	1041.5	1039.45	3.3	1	27.8	0.14	26	116.28	18	1	0.124667	1.87144	3.72569	55.5988	93.7545	0.491505	6.12016	92.5661
vaNUgw8146	2020-05-28	202007	P2_10	2	31	3.52	34.36	109	1065	90.7075	vaNUgw8146	0	1	0	0	0	9.41	250	1037.4	1041.5	1039.45	3.3	1	27.8	0.14	26	116.28	18	1	0.124667	1.87144	3.72569	55.5988	93.7545	0.504401	4.92364	90.7075
vaNUgw8146	2020-05-28	202008	P2_10	3	30.92	1.95	25.96	60	803	93.0133	vaNUgw8146	0	1	0	0	0	9.41	250	1037.4	1041.5	1039.45	3.3	1	27.8	0.14	26	116.28	18	1	0.124667	1.87144	3.72569	55.5988	93.7545	0.279427	3.71996	93.0133
vaNUgw8146	2020-05-28	202009	P2_10	4	30	1.41	20.87	42	626	93.6715	vaNUgw8146	0	1	0	0	0	9.41	250	1037.4	1041.5	1039.45	3.3	1	27.8	0.14	26	116.28	18	1	0.124667	1.87144	3.72569	55.5988	93.7545	0.202047	2.99058	93.6715
vaNUgw8146	2020-05-28	202010	P2_10	5	31	1.01	19.65	31	609	95.1113	vaNUgw8146	0	1	0	0	0	9.41	250	1037.4	1041.5	1039.45	3.3	1	27.8	0.14	26	116.28	18	1	0.124667	1.87144	3.72569	55.5988	93.7545	0.144729	2.81576	95.1113
vaNUgw8146	2020-05-28	202011	P2_10	6	29.83	1.04	16.87	31	503	94.1932	vaNUgw8146	0	1	0	0	0	9.41	250	1037.4	1041.5	1039.45	3.3	1	27.8	0.14	26	116.28	18	1	0.124667	1.87144	3.72569	55.5988	93.7545	0.149028	2.4174	94.1932
vaNUgw8146	2020-05-28	202101	P2_10	7	30.97	1.07	14.28	33	442	93.0293	vaNUgw8146	0	1	0	0	0	9.41	250	1037.4	1041.5	1039.45	3.3	1	27.8	0.14	26	116.28	18	1	0.124667	1.87144	3.72569	55.5988	93.7545	0.153327	2.04626	93.0293
vaNUgw8146	2020-05-28	202102	P2_10	8	28	1	13.5	28	378	93.1034	vaNUgw8146	0	1	0	0	0	9.41	250	1037.4	1041.5	1039.45	3.3	1	27.8	0.14	26	116.28	18	1	0.124667	1.87144	3.72569	55.5988	93.7545	0.143296	1.93449	93.1034
kOoxWQ5972	2020-05-25	202007	S2_10-S2_12	1	30.94	3.77	66.76	117	2065	94.6548	kOoxWQ5972	0	1	0	0	0	9.82	200	894.4	900.1	897.25	2.2	0.6	0	0.472	27	97.2	15	1	0.322063	5.73244	9.48936	169.083	94.6806	0.542044	9.59864	94.6548
kOoxWQ5972	2020-05-25	202008	S2_10-S2_12	2	26.63	3.5	67.27	93	1791	95.0544	kOoxWQ5972	0	1	0	0	0	9.82	200	894.4	900.1	897.25	2.2	0.6	0	0.472	27	97.2	15	1	0.322063	5.73244	9.48936	169.083	94.6806	0.503224	9.67196	95.0544
kOoxWQ5972	2020-05-25	202009	S2_10-S2_12	3	29.6	3.86	62.03	114	1836	94.1418	kOoxWQ5972	0	1	0	0	0	9.82	200	894.4	900.1	897.25	2.2	0.6	0	0.472	27	97.2	15	1	0.322063	5.73244	9.48936	169.083	94.6806	0.554984	8.91856	94.1418
kOoxWQ5972	2020-05-25	202010	S2_10-S2_12	4	30.65	3.66	56.22	112	1723	93.8878	kOoxWQ5972	0	1	0	0	0	9.82	200	894.4	900.1	897.25	2.2	0.6	0	0.472	27	97.2	15	1	0.322063	5.73244	9.48936	169.083	94.6806	0.526228	8.08321	93.8878
kOoxWQ5972	2020-05-25	202011	S2_10-S2_12	5	30	2.94	54.39	88	1632	94.8718	kOoxWQ5972	0	1	0	0	0	9.82	200	894.4	900.1	897.25	2.2	0.6	0	0.472	27	97.2	15	1	0.322063	5.73244	9.48936	169.083	94.6806	0.422708	7.8201	94.8718
kOoxWQ5972	2020-05-25	202012	S2_10-S2_12	6	30.58	3.09	58.08	94	1776	94.9485	kOoxWQ5972	0	1	0	0	0	9.82	200	894.4	900.1	897.25	2.2	0.6	0	0.472	27	97.2	15	1	0.322063	5.73244	9.48936	169.083	94.6806	0.444275	8.35064	94.9485
kOoxWQ5972	2020-05-25	202101	S2_10-S2_12	7	31	3.47	58.56	107	1815	94.4059	kOoxWQ5972	0	1	0	0	0	9.82	200	894.4	900.1	897.25	2.2	0.6	0	0.472	27	97.2	15	1	0.322063	5.73244	9.48936	169.083	94.6806	0.49891	8.41965	94.4059
kOoxWQ5972	2020-05-25	202102	S2_10-S2_12	8	28	4	60.17	112	1685	93.7666	kOoxWQ5972	0	1	0	0	0	9.82	200	894.4	900.1	897.25	2.2	0.6	0	0.472	27	97.2	15	1	0.322063	5.73244	9.48936	169.083	94.6806	0.575113	8.65114	93.7666
kOoxWQ5972	2020-05-25	202103	S2_10-S2_12	9	30.98	3.93	61.65	122	1910	94.0073	kOoxWQ5972	0	1	0	0	0	9.82	200	894.4	900.1	897.25	2.2	0.6	0	0.472	27	97.2	15	1	0.322063	5.73244	9.48936	169.083	94.6806	0.565048	8.86393	94.0073
kOoxWQ5972	2020-05-25	202104	S2_10-S2_12	10	29.98	3.63	60.09	109	1801	94.3032	kOoxWQ5972	0	1	0	0	0	9.82	200	894.4	900.1	897.25	2.2	0.6	0	0.472	27	97.2	15	1	0.322063	5.73244	9.48936	169.083	94.6806	0.521915	8.63963	94.3032
kOoxWQ5972	2020-05-25	202105	S2_10-S2_12	11	31	3.41	63.88	106	1980	94.9324	kOoxWQ5972	0	1	0	0	0	9.82	200	894.4	900.1	897.25	2.2	0.6	0	0.472	27	97.2	15	1	0.322063	5.73244	9.48936	169.083	94.6806	0.490284	9.18455	94.9324
kOoxWQ5972	2020-05-25	202007	G1_6+7-G1_9	1	30.94	3.77	66.76	117	2065	94.6548	kOoxWQ5972	0	1	0	0	0	9.82	200	1038	1048.2	1043.1	4.9	2.3	29.1	0.435	30	104.4	16	1	1.1378	20.2518	33.5244	597.344	94.6806	1.91495	33.9104	94.6548
kOoxWQ5972	2020-05-25	202008	G1_6+7-G1_9	2	26.63	3.5	67.27	93	1791	95.0544	kOoxWQ5972	0	1	0	0	0	9.82	200	1038	1048.2	1043.1	4.9	2.3	29.1	0.435	30	104.4	16	1	1.1378	20.2518	33.5244	597.344	94.6806	1.77781	34.1695	95.0544
kOoxWQ5972	2020-05-25	202009	G1_6+7-G1_9	3	29.6	3.86	62.03	114	1836	94.1418	kOoxWQ5972	0	1	0	0	0	9.82	200	1038	1048.2	1043.1	4.9	2.3	29.1	0.435	30	104.4	16	1	1.1378	20.2518	33.5244	597.344	94.6806	1.96067	31.5079	94.1418
kOoxWQ5972	2020-05-25	202010	G1_6+7-G1_9	4	30.65	3.66	56.22	112	1723	93.8878	kOoxWQ5972	0	1	0	0	0	9.82	200	1038	1048.2	1043.1	4.9	2.3	29.1	0.435	30	104.4	16	1	1.1378	20.2518	33.5244	597.344	94.6806	1.85908	28.5567	93.8878
kOoxWQ5972	2020-05-25	202011	G1_6+7-G1_9	5	30	2.94	54.39	88	1632	94.8718	kOoxWQ5972	0	1	0	0	0	9.82	200	1038	1048.2	1043.1	4.9	2.3	29.1	0.435	30	104.4	16	1	1.1378	20.2518	33.5244	597.344	94.6806	1.49336	27.6271	94.8718
kOoxWQ5972	2020-05-25	202012	G1_6+7-G1_9	6	30.58	3.09	58.08	94	1776	94.9485	kOoxWQ5972	0	1	0	0	0	9.82	200	1038	1048.2	1043.1	4.9	2.3	29.1	0.435	30	104.4	16	1	1.1378	20.2518	33.5244	597.344	94.6806	1.56955	29.5015	94.9485
kOoxWQ5972	2020-05-25	202101	G1_6+7-G1_9	7	31	3.47	58.56	107	1815	94.4059	kOoxWQ5972	0	1	0	0	0	9.82	200	1038	1048.2	1043.1	4.9	2.3	29.1	0.435	30	104.4	16	1	1.1378	20.2518	33.5244	597.344	94.6806	1.76257	29.7453	94.4059
kOoxWQ5972	2020-05-25	202102	G1_6+7-G1_9	8	28	4	60.17	112	1685	93.7666	kOoxWQ5972	0	1	0	0	0	9.82	200	1038	1048.2	1043.1	4.9	2.3	29.1	0.435	30	104.4	16	1	1.1378	20.2518	33.5244	597.344	94.6806	2.03178	30.5631	93.7666
kOoxWQ5972	2020-05-25	202103	G1_6+7-G1_9	9	30.98	3.93	61.65	122	1910	94.0073	kOoxWQ5972	0	1	0	0	0	9.82	200	1038	1048.2	1043.1	4.9	2.3	29.1	0.435	30	104.4	16	1	1.1378	20.2518	33.5244	597.344	94.6806	1.99623	31.3148	94.0073
kOoxWQ5972	2020-05-25	202104	G1_6+7-G1_9	10	29.98	3.63	60.09	109	1801	94.3032	kOoxWQ5972	0	1	0	0	0	9.82	200	1038	1048.2	1043.1	4.9	2.3	29.1	0.435	30	104.4	16	1	1.1378	20.2518	33.5244	597.344	94.6806	1.84384	30.5224	94.3032
kOoxWQ5972	2020-05-25	202105	G1_6+7-G1_9	11	31	3.41	63.88	106	1980	94.9324	kOoxWQ5972	0	1	0	0	0	9.82	200	1038	1048.2	1043.1	4.9	2.3	29.1	0.435	30	104.4	16	1	1.1378	20.2518	33.5244	597.344	94.6806	1.73209	32.4476	94.9324
PRQYku1502	2020-05-26	202006	S1_1-S1_2	1	3.79	5.5	90.93	21	345	94.2964	PRQYku1502	0	1	0	0	0	9.91	250	887.9	892.5	890.2	3	1.6	29.8	0.12	37	116.55	15	1	0.506802	9.86558	15.1066	296.041	95.1139	1.3401	22.1555	94.2964
PRQYku1502	2020-05-26	202007	S1_1-S1_2	2	31	2.32	54.77	72	1698	95.9362	PRQYku1502	0	1	0	0	0	9.91	250	887.9	892.5	890.2	3	1.6	29.8	0.12	37	116.55	15	1	0.506802	9.86558	15.1066	296.041	95.1139	0.565279	13.345	95.9362
PRQYku1502	2020-05-26	202008	S1_1-S1_2	3	30.58	2.12	55.91	65	1710	96.3467	PRQYku1502	0	1	0	0	0	9.91	250	887.9	892.5	890.2	3	1.6	29.8	0.12	37	116.55	15	1	0.506802	9.86558	15.1066	296.041	95.1139	0.516548	13.6227	96.3467
PRQYku1502	2020-05-26	202009	S1_1-S1_2	4	29.1	2.2	53.49	64	1557	96.0496	PRQYku1502	0	1	0	0	0	9.91	250	887.9	892.5	890.2	3	1.6	29.8	0.12	37	116.55	15	1	0.506802	9.86558	15.1066	296.041	95.1139	0.536041	13.0331	96.0496
PRQYku1502	2020-05-26	202006	S1_3	1	3.79	5.5	90.93	21	345	94.2964	PRQYku1502	0	1	0	0	0	9.91	250	894.9	896.5	895.7	1.8	1.8	29	0.18	35	126	15	1	0.855228	16.6482	25.4924	499.569	95.1139	2.26142	37.3875	94.2964
PRQYku1502	2020-05-26	202007	S1_3	2	31	2.32	54.77	72	1698	95.9362	PRQYku1502	0	1	0	0	0	9.91	250	894.9	896.5	895.7	1.8	1.8	29	0.18	35	126	15	1	0.855228	16.6482	25.4924	499.569	95.1139	0.953909	22.5196	95.9362
PRQYku1502	2020-05-26	202008	S1_3	3	30.58	2.12	55.91	65	1710	96.3467	PRQYku1502	0	1	0	0	0	9.91	250	894.9	896.5	895.7	1.8	1.8	29	0.18	35	126	15	1	0.855228	16.6482	25.4924	499.569	95.1139	0.871675	22.9884	96.3467
PRQYku1502	2020-05-26	202009	S1_3	4	29.1	2.2	53.49	64	1557	96.0496	PRQYku1502	0	1	0	0	0	9.91	250	894.9	896.5	895.7	1.8	1.8	29	0.18	35	126	15	1	0.855228	16.6482	25.4924	499.569	95.1139	0.904569	21.9934	96.0496
PRQYku1502	2020-05-26	202006	S1_4+5	1	3.79	5.5	90.93	21	345	94.2964	PRQYku1502	0	1	0	0	0	9.91	250	897.9	900	898.95	1.8	1.6	30.8	0.17	38	135	16	1	0.71797	13.9762	21.401	419.391	95.1139	1.89848	31.387	94.2964
PRQYku1502	2020-05-26	202007	S1_4+5	2	31	2.32	54.77	72	1698	95.9362	PRQYku1502	0	1	0	0	0	9.91	250	897.9	900	898.95	1.8	1.6	30.8	0.17	38	135	16	1	0.71797	13.9762	21.401	419.391	95.1139	0.800812	18.9054	95.9362
PRQYku1502	2020-05-26	202008	S1_4+5	3	30.58	2.12	55.91	65	1710	96.3467	PRQYku1502	0	1	0	0	0	9.91	250	897.9	900	898.95	1.8	1.6	30.8	0.17	38	135	16	1	0.71797	13.9762	21.401	419.391	95.1139	0.731777	19.2989	96.3467
PRQYku1502	2020-05-26	202009	S1_4+5	4	29.1	2.2	53.49	64	1557	96.0496	PRQYku1502	0	1	0	0	0	9.91	250	897.9	900	898.95	1.8	1.6	30.8	0.17	38	135	16	1	0.71797	13.9762	21.401	419.391	95.1139	0.759391	18.4636	96.0496
orcXZn2505	2020-05-13	202006	G4_1_1-G4_3_2	1	30	3.91	37.86	117	1136	90.6392	orcXZn2505	0	1	0	0	0	9.85	250	1082.3	1096.8	1089.55	9.9	4.9	0	0.07	25	98.69	15	1	1.24954	16.8689	37.4863	505.441	93.1034	2.44286	23.6539	90.6392
orcXZn2505	2020-05-13	202007	G4_1_1-G4_3_2	2	30.83	3.4	33.56	105	1035	90.8009	orcXZn2505	0	1	0	0	0	9.85	250	1082.3	1096.8	1089.55	9.9	4.9	0	0.07	25	98.69	15	1	1.24954	16.8689	37.4863	505.441	93.1034	2.12423	20.9674	90.8009
orcXZn2505	2020-05-13	202008	G4_1_1-G4_3_2	3	30.9	3.24	32.55	100	1006	90.9472	orcXZn2505	0	1	0	0	0	9.85	250	1082.3	1096.8	1089.55	9.9	4.9	0	0.07	25	98.69	15	1	1.24954	16.8689	37.4863	505.441	93.1034	2.02426	20.3363	90.9472
orcXZn2505	2020-05-13	202009	G4_1_1-G4_3_2	4	29.96	2.88	29.96	86	898	91.2302	orcXZn2505	0	1	0	0	0	9.85	250	1082.3	1096.8	1089.55	9.9	4.9	0	0.07	25	98.69	15	1	1.24954	16.8689	37.4863	505.441	93.1034	1.79934	18.7182	91.2302
orcXZn2505	2020-05-13	202010	G4_1_1-G4_3_2	5	30.88	2.77	26.87	86	830	90.6545	orcXZn2505	0	1	0	0	0	9.85	250	1082.3	1096.8	1089.55	9.9	4.9	0	0.07	25	98.69	15	1	1.24954	16.8689	37.4863	505.441	93.1034	1.73062	16.7876	90.6545
orcXZn2505	2020-05-13	202011	G4_1_1-G4_3_2	6	29.88	2.72	28.24	81	844	91.2145	orcXZn2505	0	1	0	0	0	9.85	250	1082.3	1096.8	1089.55	9.9	4.9	0	0.07	25	98.69	15	1	1.24954	16.8689	37.4863	505.441	93.1034	1.69938	17.6436	91.2145
orcXZn2505	2020-05-13	202012	G4_1_1-G4_3_2	7	30.83	2.43	27.61	75	851	91.9108	orcXZn2505	0	1	0	0	0	9.85	250	1082.3	1096.8	1089.55	9.9	4.9	0	0.07	25	98.69	15	1	1.24954	16.8689	37.4863	505.441	93.1034	1.5182	17.25	91.9108
orcXZn2505	2020-05-13	202101	G4_1_1-G4_3_2	8	30.54	2.38	25.81	73	788	91.5573	orcXZn2505	0	1	0	0	0	9.85	250	1082.3	1096.8	1089.55	9.9	4.9	0	0.07	25	98.69	15	1	1.24954	16.8689	37.4863	505.441	93.1034	1.48696	16.1254	91.5573
orcXZn2505	2020-05-13	202102	G4_1_1-G4_3_2	9	27.98	2.35	24.21	66	677	91.1521	orcXZn2505	0	1	0	0	0	9.85	250	1082.3	1096.8	1089.55	9.9	4.9	0	0.07	25	98.69	15	1	1.24954	16.8689	37.4863	505.441	93.1034	1.46821	15.1257	91.1521
orcXZn2505	2020-05-13	202103	G4_1_1-G4_3_2	10	30.81	2.53	25.79	78	795	91.0664	orcXZn2505	0	1	0	0	0	9.85	250	1082.3	1096.8	1089.55	9.9	4.9	0	0.07	25	98.69	15	1	1.24954	16.8689	37.4863	505.441	93.1034	1.58067	16.1129	91.0664
orcXZn2505	2020-05-13	202104	G4_1_1-G4_3_2	11	29.92	2.38	25.19	71	754	91.3674	orcXZn2505	0	1	0	0	0	9.85	250	1082.3	1096.8	1089.55	9.9	4.9	0	0.07	25	98.69	15	1	1.24954	16.8689	37.4863	505.441	93.1034	1.48696	15.738	91.3674
orcXZn2505	2020-05-13	202105	G4_1_1-G4_3_2	12	31	2.35	25.29	73	784	91.4978	orcXZn2505	0	1	0	0	0	9.85	250	1082.3	1096.8	1089.55	9.9	4.9	0	0.07	25	98.69	15	1	1.24954	16.8689	37.4863	505.441	93.1034	1.46821	15.8005	91.4978
orcXZn2505	2020-05-13	202006	G4_4_1-G4_5_2	1	30	3.91	37.86	117	1136	90.6392	orcXZn2505	0	1	0	0	0	9.85	250	1099	1105.8	1102.4	5	3.2	0	0.06	27	97.83	15	1	0.699454	9.44262	20.9836	282.929	93.1034	1.36743	13.2407	90.6392
orcXZn2505	2020-05-13	202007	G4_4_1-G4_5_2	2	30.83	3.4	33.56	105	1035	90.8009	orcXZn2505	0	1	0	0	0	9.85	250	1099	1105.8	1102.4	5	3.2	0	0.06	27	97.83	15	1	0.699454	9.44262	20.9836	282.929	93.1034	1.18907	11.7368	90.8009
orcXZn2505	2020-05-13	202008	G4_4_1-G4_5_2	3	30.9	3.24	32.55	100	1006	90.9472	orcXZn2505	0	1	0	0	0	9.85	250	1099	1105.8	1102.4	5	3.2	0	0.06	27	97.83	15	1	0.699454	9.44262	20.9836	282.929	93.1034	1.13311	11.3836	90.9472
orcXZn2505	2020-05-13	202009	G4_4_1-G4_5_2	4	29.96	2.88	29.96	86	898	91.2302	orcXZn2505	0	1	0	0	0	9.85	250	1099	1105.8	1102.4	5	3.2	0	0.06	27	97.83	15	1	0.699454	9.44262	20.9836	282.929	93.1034	1.00721	10.4778	91.2302
orcXZn2505	2020-05-13	202010	G4_4_1-G4_5_2	5	30.88	2.77	26.87	86	830	90.6545	orcXZn2505	0	1	0	0	0	9.85	250	1099	1105.8	1102.4	5	3.2	0	0.06	27	97.83	15	1	0.699454	9.44262	20.9836	282.929	93.1034	0.968743	9.39716	90.6545
orcXZn2505	2020-05-13	202011	G4_4_1-G4_5_2	6	29.88	2.72	28.24	81	844	91.2145	orcXZn2505	0	1	0	0	0	9.85	250	1099	1105.8	1102.4	5	3.2	0	0.06	27	97.83	15	1	0.699454	9.44262	20.9836	282.929	93.1034	0.951257	9.87628	91.2145
orcXZn2505	2020-05-13	202012	G4_4_1-G4_5_2	7	30.83	2.43	27.61	75	851	91.9108	orcXZn2505	0	1	0	0	0	9.85	250	1099	1105.8	1102.4	5	3.2	0	0.06	27	97.83	15	1	0.699454	9.44262	20.9836	282.929	93.1034	0.849836	9.65596	91.9108
orcXZn2505	2020-05-13	202101	G4_4_1-G4_5_2	8	30.54	2.38	25.81	73	788	91.5573	orcXZn2505	0	1	0	0	0	9.85	250	1099	1105.8	1102.4	5	3.2	0	0.06	27	97.83	15	1	0.699454	9.44262	20.9836	282.929	93.1034	0.83235	9.02645	91.5573
orcXZn2505	2020-05-13	202102	G4_4_1-G4_5_2	9	27.98	2.35	24.21	66	677	91.1521	orcXZn2505	0	1	0	0	0	9.85	250	1099	1105.8	1102.4	5	3.2	0	0.06	27	97.83	15	1	0.699454	9.44262	20.9836	282.929	93.1034	0.821858	8.46689	91.1521
orcXZn2505	2020-05-13	202103	G4_4_1-G4_5_2	10	30.81	2.53	25.79	78	795	91.0664	orcXZn2505	0	1	0	0	0	9.85	250	1099	1105.8	1102.4	5	3.2	0	0.06	27	97.83	15	1	0.699454	9.44262	20.9836	282.929	93.1034	0.884809	9.01945	91.0664
orcXZn2505	2020-05-13	202104	G4_4_1-G4_5_2	11	29.92	2.38	25.19	71	754	91.3674	orcXZn2505	0	1	0	0	0	9.85	250	1099	1105.8	1102.4	5	3.2	0	0.06	27	97.83	15	1	0.699454	9.44262	20.9836	282.929	93.1034	0.83235	8.80962	91.3674
orcXZn2505	2020-05-13	202105	G4_4_1-G4_5_2	12	31	2.35	25.29	73	784	91.4978	orcXZn2505	0	1	0	0	0	9.85	250	1099	1105.8	1102.4	5	3.2	0	0.06	27	97.83	15	1	0.699454	9.44262	20.9836	282.929	93.1034	0.821858	8.84459	91.4978
DQ1zLYDYa4	2020-05-20	202006	S1_2-S1_4+5_1	1	26.46	1.63	42	43	1111	96.264	DQ1zLYDYa4	0	1	0	0	0	10.02	250	1073.8	1081.6	1077.7	3.8	2	29.6	0.811	27	80	14	1	0.0101725	7.18176	0	43.233	99.8586	0.829056	21.3622	96.264
DQ1zLYDYa4	2020-05-20	202007	S1_2-S1_4+5_1	2	30.97	1.04	24.04	32	745	95.8533	DQ1zLYDYa4	0	1	0	0	0	10.02	250	1073.8	1081.6	1077.7	3.8	2	29.6	0.811	27	80	14	1	0.0101725	7.18176	0	43.233	99.8586	0.528968	12.2273	95.8533
DQ1zLYDYa4	2020-05-20	202008	S1_2-S1_4+5_1	3	30.98	0.54	23.17	17	718	97.7225	DQ1zLYDYa4	0	1	0	0	0	10.02	250	1073.8	1081.6	1077.7	3.8	2	29.6	0.811	27	80	14	1	0.0101725	7.18176	0	43.233	99.8586	0.274657	11.7848	97.7225
DQ1zLYDYa4	2020-05-20	202009	S1_2-S1_4+5_1	4	29.83	0.43	18.74	13	559	97.7569	DQ1zLYDYa4	0	1	0	0	0	10.02	250	1073.8	1081.6	1077.7	3.8	2	29.6	0.811	27	80	14	1	0.0101725	7.18176	0	43.233	99.8586	0.218708	9.5316	97.7569
DQ1zLYDYa4	2020-05-20	202010	S1_2-S1_4+5_1	5	26.17	0.23	17.76	6	465	98.7215	DQ1zLYDYa4	0	1	0	0	0	10.02	250	1073.8	1081.6	1077.7	3.8	2	29.6	0.811	27	80	14	1	0.0101725	7.18176	0	43.233	99.8586	0.116983	9.03315	98.7215
DQ1zLYDYa4	2020-05-20	202011	S1_2-S1_4+5_1	6	29.48	0.25	21.94	7	647	98.8734	DQ1zLYDYa4	0	1	0	0	0	10.02	250	1073.8	1081.6	1077.7	3.8	2	29.6	0.811	27	80	14	1	0.0101725	7.18176	0	43.233	99.8586	0.127156	11.1592	98.8734
DQ1zLYDYa4	2020-05-20	202012	S1_2-S1_4+5_1	7	25.74	0.06	12.21	2	314	99.511	DQ1zLYDYa4	0	1	0	0	0	10.02	250	1073.8	1081.6	1077.7	3.8	2	29.6	0.811	27	80	14	1	0.0101725	7.18176	0	43.233	99.8586	0.0305174	6.21029	99.511
VxgSgD4873	2020-06-08	202007	S1_1-S1_4+5_1	1	29.65	4.43	59.26	131	1757	93.0444	VxgSgD4873	0	1	0	0	0	9.4	250	853.1	863.2	858.15	4.2	2.7	28.5	0.428	26	99.96	15.5	1	1.39498	22.2329	42.7793	680.749	94.096	2.74656	36.7406	93.0444
VxgSgD4873	2020-06-08	202008	S1_1-S1_4+5_1	2	30.85	5.39	67.3	166	2077	92.5849	VxgSgD4873	0	1	0	0	0	9.4	250	853.1	863.2	858.15	4.2	2.7	28.5	0.428	26	99.96	15.5	1	1.39498	22.2329	42.7793	680.749	94.096	3.34175	41.7254	92.5849
VxgSgD4873	2020-06-08	202009	S1_1-S1_4+5_1	3	29.86	3.84	65.61	115	1959	94.4708	VxgSgD4873	0	1	0	0	0	9.4	250	853.1	863.2	858.15	4.2	2.7	28.5	0.428	26	99.96	15.5	1	1.39498	22.2329	42.7793	680.749	94.096	2.38076	40.6776	94.4708
VxgSgD4873	2020-06-08	202010	S1_1-S1_4+5_1	4	31	2.32	53.62	72	1662	95.8527	VxgSgD4873	0	1	0	0	0	9.4	250	853.1	863.2	858.15	4.2	2.7	28.5	0.428	26	99.96	15.5	1	1.39498	22.2329	42.7793	680.749	94.096	1.43838	33.2439	95.8527
VxgSgD4873	2020-06-08	202011	S1_1-S1_4+5_1	5	30	2.41	53.69	72	1611	95.7041	VxgSgD4873	0	1	0	0	0	9.4	250	853.1	863.2	858.15	4.2	2.7	28.5	0.428	26	99.96	15.5	1	1.39498	22.2329	42.7793	680.749	94.096	1.49418	33.2873	95.7041
VxgSgD4873	2020-06-08	202007	S1_4+5_2-S2_5+6	1	29.65	4.43	59.26	131	1757	93.0444	VxgSgD4873	0	1	0	0	0	9.4	250	865.2	896.1	880.65	3.1	1.2	28.7	0.441	26	96.6	15	1	0.638822	10.1814	19.5905	311.745	94.096	1.25777	16.8251	93.0444
VxgSgD4873	2020-06-08	202008	S1_4+5_2-S2_5+6	2	30.85	5.39	67.3	166	2077	92.5849	VxgSgD4873	0	1	0	0	0	9.4	250	865.2	896.1	880.65	3.1	1.2	28.7	0.441	26	96.6	15	1	0.638822	10.1814	19.5905	311.745	94.096	1.53033	19.1079	92.5849
VxgSgD4873	2020-06-08	202009	S1_4+5_2-S2_5+6	3	29.86	3.84	65.61	115	1959	94.4708	VxgSgD4873	0	1	0	0	0	9.4	250	865.2	896.1	880.65	3.1	1.2	28.7	0.441	26	96.6	15	1	0.638822	10.1814	19.5905	311.745	94.096	1.09026	18.628	94.4708
VxgSgD4873	2020-06-08	202010	S1_4+5_2-S2_5+6	4	31	2.32	53.62	72	1662	95.8527	VxgSgD4873	0	1	0	0	0	9.4	250	865.2	896.1	880.65	3.1	1.2	28.7	0.441	26	96.6	15	1	0.638822	10.1814	19.5905	311.745	94.096	0.658696	15.2238	95.8527
VxgSgD4873	2020-06-08	202011	S1_4+5_2-S2_5+6	5	30	2.41	53.69	72	1611	95.7041	VxgSgD4873	0	1	0	0	0	9.4	250	865.2	896.1	880.65	3.1	1.2	28.7	0.441	26	96.6	15	1	0.638822	10.1814	19.5905	311.745	94.096	0.684249	15.2437	95.7041
VxgSgD4873	2020-06-08	202007	S2_15+16-S3_10	1	29.65	4.43	59.26	131	1757	93.0444	VxgSgD4873	0	1	0	0	0	9.4	250	926.8	962	944.4	6.8	1.1	27.7	0.121	27	109.62	17	1	0.160671	2.56074	4.92725	78.4075	94.096	0.316344	4.23172	93.0444
VxgSgD4873	2020-06-08	202008	S2_15+16-S3_10	2	30.85	5.39	67.3	166	2077	92.5849	VxgSgD4873	0	1	0	0	0	9.4	250	926.8	962	944.4	6.8	1.1	27.7	0.121	27	109.62	17	1	0.160671	2.56074	4.92725	78.4075	94.096	0.384897	4.80585	92.5849
VxgSgD4873	2020-06-08	202009	S2_15+16-S3_10	3	29.86	3.84	65.61	115	1959	94.4708	VxgSgD4873	0	1	0	0	0	9.4	250	926.8	962	944.4	6.8	1.1	27.7	0.121	27	109.62	17	1	0.160671	2.56074	4.92725	78.4075	94.096	0.274212	4.68517	94.4708
VxgSgD4873	2020-06-08	202010	S2_15+16-S3_10	4	31	2.32	53.62	72	1662	95.8527	VxgSgD4873	0	1	0	0	0	9.4	250	926.8	962	944.4	6.8	1.1	27.7	0.121	27	109.62	17	1	0.160671	2.56074	4.92725	78.4075	94.096	0.16567	3.82897	95.8527
VxgSgD4873	2020-06-08	202011	S2_15+16-S3_10	5	30	2.41	53.69	72	1611	95.7041	VxgSgD4873	0	1	0	0	0	9.4	250	926.8	962	944.4	6.8	1.1	27.7	0.121	27	109.62	17	1	0.160671	2.56074	4.92725	78.4075	94.096	0.172097	3.83397	95.7041
VxgSgD4873	2020-06-08	202007	P2_4-P2_9	1	29.65	4.43	59.26	131	1757	93.0444	VxgSgD4873	0	1	0	0	0	9.4	250	1010.9	1023	1016.95	2	0.4	26.3	0.115	33	97.44	15	1	0.0555287	0.885005	1.70288	27.098	94.096	0.10933	1.4625	93.0444
VxgSgD4873	2020-06-08	202008	P2_4-P2_9	2	30.85	5.39	67.3	166	2077	92.5849	VxgSgD4873	0	1	0	0	0	9.4	250	1010.9	1023	1016.95	2	0.4	26.3	0.115	33	97.44	15	1	0.0555287	0.885005	1.70288	27.098	94.096	0.133022	1.66093	92.5849
VxgSgD4873	2020-06-08	202009	P2_4-P2_9	3	29.86	3.84	65.61	115	1959	94.4708	VxgSgD4873	0	1	0	0	0	9.4	250	1010.9	1023	1016.95	2	0.4	26.3	0.115	33	97.44	15	1	0.0555287	0.885005	1.70288	27.098	94.096	0.094769	1.61922	94.4708
VxgSgD4873	2020-06-08	202010	P2_4-P2_9	4	31	2.32	53.62	72	1662	95.8527	VxgSgD4873	0	1	0	0	0	9.4	250	1010.9	1023	1016.95	2	0.4	26.3	0.115	33	97.44	15	1	0.0555287	0.885005	1.70288	27.098	94.096	0.0572563	1.32331	95.8527
VxgSgD4873	2020-06-08	202011	P2_4-P2_9	5	30	2.41	53.69	72	1611	95.7041	VxgSgD4873	0	1	0	0	0	9.4	250	1010.9	1023	1016.95	2	0.4	26.3	0.115	33	97.44	15	1	0.0555287	0.885005	1.70288	27.098	94.096	0.0594774	1.32504	95.7041
sOBWFF5458	2020-06-29	202007	G2_19-G2_21	1	23.88	5.6	50.36	134	1203	89.9929	sOBWFF5458	0	1	0	0	0	9.83	300	1042.1	1052	1047.05	8.2	2.3	0	0.07	37	85.12	14	1	0.252709	1.95937	7.27848	56.4228	88.5759	0.326076	2.93235	89.9929
sOBWFF5458	2020-06-29	202008	G2_19-G2_21	2	25.83	8.73	104.03	225	2674	92.2579	sOBWFF5458	0	1	0	0	0	9.83	300	1042.1	1052	1047.05	8.2	2.3	0	0.07	37	85.12	14	1	0.252709	1.95937	7.27848	56.4228	88.5759	0.508329	6.05744	92.2579
sOBWFF5458	2020-06-29	202009	G2_19-G2_21	3	29.04	8.12	99.61	236	2893	92.4626	sOBWFF5458	0	1	0	0	0	9.83	300	1042.1	1052	1047.05	8.2	2.3	0	0.07	37	85.12	14	1	0.252709	1.95937	7.27848	56.4228	88.5759	0.47281	5.80008	92.4626
sOBWFF5458	2020-06-29	202010	G2_19-G2_21	4	30.92	8.29	97.21	256	3005	92.1422	sOBWFF5458	0	1	0	0	0	9.83	300	1042.1	1052	1047.05	8.2	2.3	0	0.07	37	85.12	14	1	0.252709	1.95937	7.27848	56.4228	88.5759	0.482709	5.66033	92.1422
sOBWFF5458	2020-06-29	202011	G2_19-G2_21	5	29.02	7.86	96	228	2786	92.4321	sOBWFF5458	0	1	0	0	0	9.83	300	1042.1	1052	1047.05	8.2	2.3	0	0.07	37	85.12	14	1	0.252709	1.95937	7.27848	56.4228	88.5759	0.457671	5.58987	92.4321
sOBWFF5458	2020-06-29	202012	G2_19-G2_21	6	30.88	9.49	96.79	293	2988	91.0708	sOBWFF5458	0	1	0	0	0	9.83	300	1042.1	1052	1047.05	8.2	2.3	0	0.07	37	85.12	14	1	0.252709	1.95937	7.27848	56.4228	88.5759	0.552582	5.63587	91.0708
sOBWFF5458	2020-06-29	202101	G2_19-G2_21	7	30.92	8.23	99.93	254	3089	92.3909	sOBWFF5458	0	1	0	0	0	9.83	300	1042.1	1052	1047.05	8.2	2.3	0	0.07	37	85.12	14	1	0.252709	1.95937	7.27848	56.4228	88.5759	0.479215	5.81871	92.3909
sOBWFF5458	2020-06-29	202102	G2_19-G2_21	8	27.96	7.61	96.91	213	2710	92.7191	sOBWFF5458	0	1	0	0	0	9.83	300	1042.1	1052	1047.05	8.2	2.3	0	0.07	37	85.12	14	1	0.252709	1.95937	7.27848	56.4228	88.5759	0.443114	5.64286	92.7191
sOBWFF5458	2020-06-29	202104	G2_19-G2_21	9	29.91	7.66	92.86	229	2778	92.3796	sOBWFF5458	0	1	0	0	0	9.83	300	1042.1	1052	1047.05	8.2	2.3	0	0.07	37	85.12	14	1	0.252709	1.95937	7.27848	56.4228	88.5759	0.446025	5.40704	92.3796
sOBWFF5458	2020-06-29	202105	G2_19-G2_21	10	30.86	6.72	93.85	207	2896	93.3181	sOBWFF5458	0	1	0	0	0	9.83	300	1042.1	1052	1047.05	8.2	2.3	0	0.07	37	85.12	14	1	0.252709	1.95937	7.27848	56.4228	88.5759	0.391291	5.46468	93.3181
sOBWFF5458	2020-06-29	202106	G2_19-G2_21	11	29.96	6.18	94.3	185	2825	93.8495	sOBWFF5458	0	1	0	0	0	9.83	300	1042.1	1052	1047.05	8.2	2.3	0	0.07	37	85.12	14	1	0.252709	1.95937	7.27848	56.4228	88.5759	0.359848	5.49089	93.8495
cEJWjb7737	2020-06-18	202007	S1_*3-S1_*4+5	1	30.9	2.29	43.53	71	1345	95.0022	cEJWjb7737	0	1	0	0	0	9.41	220	906	911.1	908.55	2.9	0.8	30.1	0.13	29	80	14	1	0.0370951	1.19406	1.03599	33.3856	96.987	0.0765296	1.45473	95.0022
cEJWjb7737	2020-06-18	202008	S1_*3-S1_*4+5	2	30.96	1.13	17.61	35	545	93.9701	cEJWjb7737	0	1	0	0	0	9.41	220	906	911.1	908.55	2.9	0.8	30.1	0.13	29	80	14	1	0.0370951	1.19406	1.03599	33.3856	96.987	0.0377635	0.588509	93.9701
cEJWjb7737	2020-06-18	202010	S1_*3-S1_*4+5	3	31	2.9	46.49	90	1441	94.1284	cEJWjb7737	0	1	0	0	0	9.41	220	906	911.1	908.55	2.9	0.8	30.1	0.13	29	80	14	1	0.0370951	1.19406	1.03599	33.3856	96.987	0.0969152	1.55365	94.1284
cEJWjb7737	2020-06-18	202011	S1_*3-S1_*4+5	4	29.79	1.45	55.8	43	1662	97.4672	cEJWjb7737	0	1	0	0	0	9.41	220	906	911.1	908.55	2.9	0.8	30.1	0.13	29	80	14	1	0.0370951	1.19406	1.03599	33.3856	96.987	0.0484576	1.86478	97.4672
cEJWjb7737	2020-06-18	202012	S1_*3-S1_*4+5	5	30.71	2.26	60.2	69	1848	96.3817	cEJWjb7737	0	1	0	0	0	9.41	220	906	911.1	908.55	2.9	0.8	30.1	0.13	29	80	14	1	0.0370951	1.19406	1.03599	33.3856	96.987	0.075527	2.01183	96.3817
cEJWjb7737	2020-06-18	202101	S1_*3-S1_*4+5	6	30.88	3.3	60.25	102	1860	94.8072	cEJWjb7737	0	1	0	0	0	9.41	220	906	911.1	908.55	2.9	0.8	30.1	0.13	29	80	14	1	0.0370951	1.19406	1.03599	33.3856	96.987	0.110283	2.0135	94.8072
cEJWjb7737	2020-06-18	202102	S1_*3-S1_*4+5	7	27.33	3.87	65.34	106	1786	94.4083	cEJWjb7737	0	1	0	0	0	9.41	220	906	911.1	908.55	2.9	0.8	30.1	0.13	29	80	14	1	0.0370951	1.19406	1.03599	33.3856	96.987	0.129332	2.1836	94.4083
cEJWjb7737	2020-06-18	202103	S1_*3-S1_*4+5	8	30.92	4.08	57.45	126	1776	93.3691	cEJWjb7737	0	1	0	0	0	9.41	220	906	911.1	908.55	2.9	0.8	30.1	0.13	29	80	14	1	0.0370951	1.19406	1.03599	33.3856	96.987	0.13635	1.91992	93.3691
cEJWjb7737	2020-06-18	202104	S1_*3-S1_*4+5	9	24.08	3.76	57.85	90	1404	93.8971	cEJWjb7737	0	1	0	0	0	9.41	220	906	911.1	908.55	2.9	0.8	30.1	0.13	29	80	14	1	0.0370951	1.19406	1.03599	33.3856	96.987	0.125656	1.93329	93.8971
cEJWjb7737	2020-06-18	202105	S1_*3-S1_*4+5	10	23.9	2.65	75.67	63	1808	96.6164	cEJWjb7737	0	1	0	0	0	9.41	220	906	911.1	908.55	2.9	0.8	30.1	0.13	29	80	14	1	0.0370951	1.19406	1.03599	33.3856	96.987	0.0885604	2.52882	96.6164
cEJWjb7737	2020-06-18	202106	S1_*3-S1_*4+5	11	29.65	5.31	106.56	158	3159	95.2534	cEJWjb7737	0	1	0	0	0	9.41	220	906	911.1	908.55	2.9	0.8	30.1	0.13	29	80	14	1	0.0370951	1.19406	1.03599	33.3856	96.987	0.177455	3.56113	95.2534
cEJWjb7737	2020-06-18	202007	S2_3-S2_7	1	30.9	2.29	43.53	71	1345	95.0022	cEJWjb7737	0	1	0	0	0	9.41	220	933.4	945.1	939.25	7.3	1.2	29.1	0.18	31	150	27	2	0.0770437	2.47997	2.15167	69.3393	96.987	0.158946	3.02136	95.0022
cEJWjb7737	2020-06-18	202008	S2_3-S2_7	2	30.96	1.13	17.61	35	545	93.9701	cEJWjb7737	0	1	0	0	0	9.41	220	933.4	945.1	939.25	7.3	1.2	29.1	0.18	31	150	27	2	0.0770437	2.47997	2.15167	69.3393	96.987	0.0784319	1.22229	93.9701
cEJWjb7737	2020-06-18	202010	S2_3-S2_7	3	31	2.9	46.49	90	1441	94.1284	cEJWjb7737	0	1	0	0	0	9.41	220	933.4	945.1	939.25	7.3	1.2	29.1	0.18	31	150	27	2	0.0770437	2.47997	2.15167	69.3393	96.987	0.201285	3.22681	94.1284
cEJWjb7737	2020-06-18	202011	S2_3-S2_7	4	29.79	1.45	55.8	43	1662	97.4672	cEJWjb7737	0	1	0	0	0	9.41	220	933.4	945.1	939.25	7.3	1.2	29.1	0.18	31	150	27	2	0.0770437	2.47997	2.15167	69.3393	96.987	0.100643	3.87301	97.4672
cEJWjb7737	2020-06-18	202012	S2_3-S2_7	5	30.71	2.26	60.2	69	1848	96.3817	cEJWjb7737	0	1	0	0	0	9.41	220	933.4	945.1	939.25	7.3	1.2	29.1	0.18	31	150	27	2	0.0770437	2.47997	2.15167	69.3393	96.987	0.156864	4.17841	96.3817
cEJWjb7737	2020-06-18	202101	S2_3-S2_7	6	30.88	3.3	60.25	102	1860	94.8072	cEJWjb7737	0	1	0	0	0	9.41	220	933.4	945.1	939.25	7.3	1.2	29.1	0.18	31	150	27	2	0.0770437	2.47997	2.15167	69.3393	96.987	0.229049	4.18188	94.8072
cEJWjb7737	2020-06-18	202102	S2_3-S2_7	7	27.33	3.87	65.34	106	1786	94.4083	cEJWjb7737	0	1	0	0	0	9.41	220	933.4	945.1	939.25	7.3	1.2	29.1	0.18	31	150	27	2	0.0770437	2.47997	2.15167	69.3393	96.987	0.268612	4.53517	94.4083
cEJWjb7737	2020-06-18	202103	S2_3-S2_7	8	30.92	4.08	57.45	126	1776	93.3691	cEJWjb7737	0	1	0	0	0	9.41	220	933.4	945.1	939.25	7.3	1.2	29.1	0.18	31	150	27	2	0.0770437	2.47997	2.15167	69.3393	96.987	0.283188	3.98753	93.3691
cEJWjb7737	2020-06-18	202104	S2_3-S2_7	9	24.08	3.76	57.85	90	1404	93.8971	cEJWjb7737	0	1	0	0	0	9.41	220	933.4	945.1	939.25	7.3	1.2	29.1	0.18	31	150	27	2	0.0770437	2.47997	2.15167	69.3393	96.987	0.260977	4.0153	93.8971
cEJWjb7737	2020-06-18	202105	S2_3-S2_7	10	23.9	2.65	75.67	63	1808	96.6164	cEJWjb7737	0	1	0	0	0	9.41	220	933.4	945.1	939.25	7.3	1.2	29.1	0.18	31	150	27	2	0.0770437	2.47997	2.15167	69.3393	96.987	0.183933	5.25216	96.6164
cEJWjb7737	2020-06-18	202106	S2_3-S2_7	11	29.65	5.31	106.56	158	3159	95.2534	cEJWjb7737	0	1	0	0	0	9.41	220	933.4	945.1	939.25	7.3	1.2	29.1	0.18	31	150	27	2	0.0770437	2.47997	2.15167	69.3393	96.987	0.36856	7.3962	95.2534
PVMhGo1753	2020-06-08	202007	G1_1-G1_6+7	1	29.71	1.34	22.34	40	664	94.3412	PVMhGo1753	0	1	0	0	0	9.6	200	1078.9	1093.5	1086.2	4.5	0.8	0	0.14	34	95	15	1	0.79	8.7	24	262	91.6754	1.34	22.34	94.3412
PVMhGo1753	2020-06-08	202008	G1_1-G1_6+7	2	30.9	1.46	18.06	45	558	92.5205	PVMhGo1753	0	1	0	0	0	9.6	200	1078.9	1093.5	1086.2	4.5	0.8	0	0.14	34	95	15	1	0.79	8.7	24	262	91.6754	1.46	18.06	92.5205
PVMhGo1753	2020-06-08	202009	G1_1-G1_6+7	3	29.74	1.96	22.24	58	661	91.9008	PVMhGo1753	0	1	0	0	0	9.6	200	1078.9	1093.5	1086.2	4.5	0.8	0	0.14	34	95	15	1	0.79	8.7	24	262	91.6754	1.96	22.24	91.9008
PVMhGo1753	2020-06-08	202010	G1_1-G1_6+7	4	30.88	2.8	27.33	87	844	90.7069	PVMhGo1753	0	1	0	0	0	9.6	200	1078.9	1093.5	1086.2	4.5	0.8	0	0.14	34	95	15	1	0.79	8.7	24	262	91.6754	2.8	27.33	90.7069
PVMhGo1753	2020-06-08	202011	G1_1-G1_6+7	5	30	2.4	27.08	72	812	91.8589	PVMhGo1753	0	1	0	0	0	9.6	200	1078.9	1093.5	1086.2	4.5	0.8	0	0.14	34	95	15	1	0.79	8.7	24	262	91.6754	2.4	27.08	91.8589
PVMhGo1753	2020-06-08	202012	G1_1-G1_6+7	6	31	2.03	25.21	63	781	92.5477	PVMhGo1753	0	1	0	0	0	9.6	200	1078.9	1093.5	1086.2	4.5	0.8	0	0.14	34	95	15	1	0.79	8.7	24	262	91.6754	2.03	25.21	92.5477
PVMhGo1753	2020-06-08	202101	G1_1-G1_6+7	7	31	2.7	28.44	84	882	91.3295	PVMhGo1753	0	1	0	0	0	9.6	200	1078.9	1093.5	1086.2	4.5	0.8	0	0.14	34	95	15	1	0.79	8.7	24	262	91.6754	2.7	28.44	91.3295
PVMhGo1753	2020-06-08	202102	G1_1-G1_6+7	8	28	2.66	29.95	75	838	91.843	PVMhGo1753	0	1	0	0	0	9.6	200	1078.9	1093.5	1086.2	4.5	0.8	0	0.14	34	95	15	1	0.79	8.7	24	262	91.6754	2.66	29.95	91.843
PVMhGo1753	2020-06-08	202103	G1_1-G1_6+7	9	31	1.71	34.42	53	1067	95.2671	PVMhGo1753	0	1	0	0	0	9.6	200	1078.9	1093.5	1086.2	4.5	0.8	0	0.14	34	95	15	1	0.79	8.7	24	262	91.6754	1.71	34.42	95.2671
PVMhGo1753	2020-06-08	202104	G1_1-G1_6+7	10	29.81	1.71	33.32	51	993	95.1185	PVMhGo1753	0	1	0	0	0	9.6	200	1078.9	1093.5	1086.2	4.5	0.8	0	0.14	34	95	15	1	0.79	8.7	24	262	91.6754	1.71	33.32	95.1185
PVMhGo1753	2020-06-08	202105	G1_1-G1_6+7	11	30.56	1.79	31.97	55	977	94.6979	PVMhGo1753	0	1	0	0	0	9.6	200	1078.9	1093.5	1086.2	4.5	0.8	0	0.14	34	95	15	1	0.79	8.7	24	262	91.6754	1.79	31.97	94.6979
PVMhGo1753	2020-06-08	202106	G1_1-G1_6+7	12	29.99	2.05	30.55	62	916	93.7117	PVMhGo1753	0	1	0	0	0	9.6	200	1078.9	1093.5	1086.2	4.5	0.8	0	0.14	34	95	15	1	0.79	8.7	24	262	91.6754	2.05	30.55	93.7117
KnJyVo5836	2020-06-06	202007	S2_3-S2_4	1	30.81	3.11	55.72	96	1717	94.7136	KnJyVo5836	0	1	0	0	0	9.24	200	889.9	894.4	892.15	2.1	0.8	30.1	0.21	38	103.05	16	1	0.143172	1.25955	3.98706	35.3398	89.7933	0.563625	10.0981	94.7136
KnJyVo5836	2020-06-06	202008	S2_3-S2_4	2	31	2.28	56.93	71	1765	96.1493	KnJyVo5836	0	1	0	0	0	9.24	200	889.9	894.4	892.15	2.1	0.8	30.1	0.21	38	103.05	16	1	0.143172	1.25955	3.98706	35.3398	89.7933	0.413204	10.3174	96.1493
KnJyVo5836	2020-06-06	202009	S2_3-S2_4	3	28.5	2.39	55.88	68	1593	95.8984	KnJyVo5836	0	1	0	0	0	9.24	200	889.9	894.4	892.15	2.1	0.8	30.1	0.21	38	103.05	16	1	0.143172	1.25955	3.98706	35.3398	89.7933	0.433139	10.1271	95.8984
KnJyVo5836	2020-06-06	202010	S2_3-S2_4	4	30.96	3.76	53.29	116	1650	93.4093	KnJyVo5836	0	1	0	0	0	9.24	200	889.9	894.4	892.15	2.1	0.8	30.1	0.21	38	103.05	16	1	0.143172	1.25955	3.98706	35.3398	89.7933	0.681424	9.65773	93.4093
KnJyVo5836	2020-06-06	202011	S2_3-S2_4	5	29.92	4.67	52.88	140	1582	91.8853	KnJyVo5836	0	1	0	0	0	9.24	200	889.9	894.4	892.15	2.1	0.8	30.1	0.21	38	103.05	16	1	0.143172	1.25955	3.98706	35.3398	89.7933	0.846343	9.58343	91.8853
KnJyVo5836	2020-06-06	202012	S2_3-S2_4	6	31	4.33	51.96	134	1611	92.3077	KnJyVo5836	0	1	0	0	0	9.24	200	889.9	894.4	892.15	2.1	0.8	30.1	0.21	38	103.05	16	1	0.143172	1.25955	3.98706	35.3398	89.7933	0.784725	9.4167	92.3077
KnJyVo5836	2020-06-06	202101	S2_3-S2_4	7	30.96	4.01	51.77	124	1603	92.811	KnJyVo5836	0	1	0	0	0	9.24	200	889.9	894.4	892.15	2.1	0.8	30.1	0.21	38	103.05	16	1	0.143172	1.25955	3.98706	35.3398	89.7933	0.726731	9.38227	92.811
KnJyVo5836	2020-06-06	202102	S2_3-S2_4	8	27.96	3.65	51.28	102	1434	93.3552	KnJyVo5836	0	1	0	0	0	9.24	200	889.9	894.4	892.15	2.1	0.8	30.1	0.21	38	103.05	16	1	0.143172	1.25955	3.98706	35.3398	89.7933	0.661489	9.29346	93.3552
KnJyVo5836	2020-06-06	202103	S2_3-S2_4	9	31	3.8	53.57	118	1661	93.3763	KnJyVo5836	0	1	0	0	0	9.24	200	889.9	894.4	892.15	2.1	0.8	30.1	0.21	38	103.05	16	1	0.143172	1.25955	3.98706	35.3398	89.7933	0.688673	9.70848	93.3763
KnJyVo5836	2020-06-06	202104	S2_3-S2_4	10	29.96	4.06	53.8	122	1612	92.9831	KnJyVo5836	0	1	0	0	0	9.24	200	889.9	894.4	892.15	2.1	0.8	30.1	0.21	38	103.05	16	1	0.143172	1.25955	3.98706	35.3398	89.7933	0.735793	9.75016	92.9831
KnJyVo5836	2020-06-06	202105	S2_3-S2_4	11	30.96	3.96	54.28	122	1680	93.2005	KnJyVo5836	0	1	0	0	0	9.24	200	889.9	894.4	892.15	2.1	0.8	30.1	0.21	38	103.05	16	1	0.143172	1.25955	3.98706	35.3398	89.7933	0.71767	9.83715	93.2005
KnJyVo5836	2020-06-06	202106	S2_3-S2_4	12	30	3.97	54.64	119	1639	93.2264	KnJyVo5836	0	1	0	0	0	9.24	200	889.9	894.4	892.15	2.1	0.8	30.1	0.21	38	103.05	16	1	0.143172	1.25955	3.98706	35.3398	89.7933	0.719482	9.90239	93.2264
KnJyVo5836	2020-06-06	202007	P2_1-P2_2	1	30.81	3.11	55.72	96	1717	94.7136	KnJyVo5836	0	1	0	0	0	9.24	200	1018.4	1023.3	1020.85	3.1	1.4	29.8	0.23	33	91.35	14	1	0.274412	2.41413	7.64186	67.7346	89.7933	1.08028	19.3547	94.7136
KnJyVo5836	2020-06-06	202008	P2_1-P2_2	2	31	2.28	56.93	71	1765	96.1493	KnJyVo5836	0	1	0	0	0	9.24	200	1018.4	1023.3	1020.85	3.1	1.4	29.8	0.23	33	91.35	14	1	0.274412	2.41413	7.64186	67.7346	89.7933	0.791974	19.775	96.1493
KnJyVo5836	2020-06-06	202009	P2_1-P2_2	3	28.5	2.39	55.88	68	1593	95.8984	KnJyVo5836	0	1	0	0	0	9.24	200	1018.4	1023.3	1020.85	3.1	1.4	29.8	0.23	33	91.35	14	1	0.274412	2.41413	7.64186	67.7346	89.7933	0.830183	19.4103	95.8984
KnJyVo5836	2020-06-06	202010	P2_1-P2_2	4	30.96	3.76	53.29	116	1650	93.4093	KnJyVo5836	0	1	0	0	0	9.24	200	1018.4	1023.3	1020.85	3.1	1.4	29.8	0.23	33	91.35	14	1	0.274412	2.41413	7.64186	67.7346	89.7933	1.30606	18.5107	93.4093
KnJyVo5836	2020-06-06	202011	P2_1-P2_2	5	29.92	4.67	52.88	140	1582	91.8853	KnJyVo5836	0	1	0	0	0	9.24	200	1018.4	1023.3	1020.85	3.1	1.4	29.8	0.23	33	91.35	14	1	0.274412	2.41413	7.64186	67.7346	89.7933	1.62216	18.3682	91.8853
KnJyVo5836	2020-06-06	202012	P2_1-P2_2	6	31	4.33	51.96	134	1611	92.3077	KnJyVo5836	0	1	0	0	0	9.24	200	1018.4	1023.3	1020.85	3.1	1.4	29.8	0.23	33	91.35	14	1	0.274412	2.41413	7.64186	67.7346	89.7933	1.50406	18.0487	92.3077
KnJyVo5836	2020-06-06	202101	P2_1-P2_2	7	30.96	4.01	51.77	124	1603	92.811	KnJyVo5836	0	1	0	0	0	9.24	200	1018.4	1023.3	1020.85	3.1	1.4	29.8	0.23	33	91.35	14	1	0.274412	2.41413	7.64186	67.7346	89.7933	1.3929	17.9827	92.811
KnJyVo5836	2020-06-06	202102	P2_1-P2_2	8	27.96	3.65	51.28	102	1434	93.3552	KnJyVo5836	0	1	0	0	0	9.24	200	1018.4	1023.3	1020.85	3.1	1.4	29.8	0.23	33	91.35	14	1	0.274412	2.41413	7.64186	67.7346	89.7933	1.26785	17.8125	93.3552
KnJyVo5836	2020-06-06	202103	P2_1-P2_2	9	31	3.8	53.57	118	1661	93.3763	KnJyVo5836	0	1	0	0	0	9.24	200	1018.4	1023.3	1020.85	3.1	1.4	29.8	0.23	33	91.35	14	1	0.274412	2.41413	7.64186	67.7346	89.7933	1.31996	18.6079	93.3763
KnJyVo5836	2020-06-06	202104	P2_1-P2_2	10	29.96	4.06	53.8	122	1612	92.9831	KnJyVo5836	0	1	0	0	0	9.24	200	1018.4	1023.3	1020.85	3.1	1.4	29.8	0.23	33	91.35	14	1	0.274412	2.41413	7.64186	67.7346	89.7933	1.41027	18.6878	92.9831
KnJyVo5836	2020-06-06	202105	P2_1-P2_2	11	30.96	3.96	54.28	122	1680	93.2005	KnJyVo5836	0	1	0	0	0	9.24	200	1018.4	1023.3	1020.85	3.1	1.4	29.8	0.23	33	91.35	14	1	0.274412	2.41413	7.64186	67.7346	89.7933	1.37553	18.8545	93.2005
KnJyVo5836	2020-06-06	202106	P2_1-P2_2	12	30	3.97	54.64	119	1639	93.2264	KnJyVo5836	0	1	0	0	0	9.24	200	1018.4	1023.3	1020.85	3.1	1.4	29.8	0.23	33	91.35	14	1	0.274412	2.41413	7.64186	67.7346	89.7933	1.37901	18.9796	93.2264
KnJyVo5836	2020-06-06	202007	G1_1-G1_6+7	1	30.81	3.11	55.72	96	1717	94.7136	KnJyVo5836	0	1	0	0	0	9.24	200	1057.3	1071.1	1064.2	3.8	1.2	28.7	0.18	35	97.65	15	1	0.184078	1.61942	5.12621	45.4369	89.7933	0.72466	12.9833	94.7136
KnJyVo5836	2020-06-06	202008	G1_1-G1_6+7	2	31	2.28	56.93	71	1765	96.1493	KnJyVo5836	0	1	0	0	0	9.24	200	1057.3	1071.1	1064.2	3.8	1.2	28.7	0.18	35	97.65	15	1	0.184078	1.61942	5.12621	45.4369	89.7933	0.531262	13.2652	96.1493
KnJyVo5836	2020-06-06	202009	G1_1-G1_6+7	3	28.5	2.39	55.88	68	1593	95.8984	KnJyVo5836	0	1	0	0	0	9.24	200	1057.3	1071.1	1064.2	3.8	1.2	28.7	0.18	35	97.65	15	1	0.184078	1.61942	5.12621	45.4369	89.7933	0.556893	13.0206	95.8984
KnJyVo5836	2020-06-06	202010	G1_1-G1_6+7	4	30.96	3.76	53.29	116	1650	93.4093	KnJyVo5836	0	1	0	0	0	9.24	200	1057.3	1071.1	1064.2	3.8	1.2	28.7	0.18	35	97.65	15	1	0.184078	1.61942	5.12621	45.4369	89.7933	0.876117	12.4171	93.4093
KnJyVo5836	2020-06-06	202011	G1_1-G1_6+7	5	29.92	4.67	52.88	140	1582	91.8853	KnJyVo5836	0	1	0	0	0	9.24	200	1057.3	1071.1	1064.2	3.8	1.2	28.7	0.18	35	97.65	15	1	0.184078	1.61942	5.12621	45.4369	89.7933	1.08816	12.3216	91.8853
KnJyVo5836	2020-06-06	202012	G1_1-G1_6+7	6	31	4.33	51.96	134	1611	92.3077	KnJyVo5836	0	1	0	0	0	9.24	200	1057.3	1071.1	1064.2	3.8	1.2	28.7	0.18	35	97.65	15	1	0.184078	1.61942	5.12621	45.4369	89.7933	1.00893	12.1072	92.3077
KnJyVo5836	2020-06-06	202101	G1_1-G1_6+7	7	30.96	4.01	51.77	124	1603	92.811	KnJyVo5836	0	1	0	0	0	9.24	200	1057.3	1071.1	1064.2	3.8	1.2	28.7	0.18	35	97.65	15	1	0.184078	1.61942	5.12621	45.4369	89.7933	0.934369	12.0629	92.811
KnJyVo5836	2020-06-06	202102	G1_1-G1_6+7	8	27.96	3.65	51.28	102	1434	93.3552	KnJyVo5836	0	1	0	0	0	9.24	200	1057.3	1071.1	1064.2	3.8	1.2	28.7	0.18	35	97.65	15	1	0.184078	1.61942	5.12621	45.4369	89.7933	0.850485	11.9487	93.3552
KnJyVo5836	2020-06-06	202103	G1_1-G1_6+7	9	31	3.8	53.57	118	1661	93.3763	KnJyVo5836	0	1	0	0	0	9.24	200	1057.3	1071.1	1064.2	3.8	1.2	28.7	0.18	35	97.65	15	1	0.184078	1.61942	5.12621	45.4369	89.7933	0.885437	12.4823	93.3763
KnJyVo5836	2020-06-06	202104	G1_1-G1_6+7	10	29.96	4.06	53.8	122	1612	92.9831	KnJyVo5836	0	1	0	0	0	9.24	200	1057.3	1071.1	1064.2	3.8	1.2	28.7	0.18	35	97.65	15	1	0.184078	1.61942	5.12621	45.4369	89.7933	0.946019	12.5359	92.9831
KnJyVo5836	2020-06-06	202105	G1_1-G1_6+7	11	30.96	3.96	54.28	122	1680	93.2005	KnJyVo5836	0	1	0	0	0	9.24	200	1057.3	1071.1	1064.2	3.8	1.2	28.7	0.18	35	97.65	15	1	0.184078	1.61942	5.12621	45.4369	89.7933	0.922718	12.6478	93.2005
KnJyVo5836	2020-06-06	202106	G1_1-G1_6+7	12	30	3.97	54.64	119	1639	93.2264	KnJyVo5836	0	1	0	0	0	9.24	200	1057.3	1071.1	1064.2	3.8	1.2	28.7	0.18	35	97.65	15	1	0.184078	1.61942	5.12621	45.4369	89.7933	0.925049	12.7317	93.2264
KnJyVo5836	2020-06-06	202007	G1_8-G1_9	1	30.81	3.11	55.72	96	1717	94.7136	KnJyVo5836	0	1	0	0	0	9.24	200	1073	1079.5	1076.25	3	1.3	28.4	0.17	37	91.98	14	1	0.188339	1.6569	5.24488	46.4887	89.7933	0.741435	13.2838	94.7136
KnJyVo5836	2020-06-06	202008	G1_8-G1_9	2	31	2.28	56.93	71	1765	96.1493	KnJyVo5836	0	1	0	0	0	9.24	200	1073	1079.5	1076.25	3	1.3	28.4	0.17	37	91.98	14	1	0.188339	1.6569	5.24488	46.4887	89.7933	0.54356	13.5723	96.1493
KnJyVo5836	2020-06-06	202009	G1_8-G1_9	3	28.5	2.39	55.88	68	1593	95.8984	KnJyVo5836	0	1	0	0	0	9.24	200	1073	1079.5	1076.25	3	1.3	28.4	0.17	37	91.98	14	1	0.188339	1.6569	5.24488	46.4887	89.7933	0.569784	13.322	95.8984
KnJyVo5836	2020-06-06	202010	G1_8-G1_9	4	30.96	3.76	53.29	116	1650	93.4093	KnJyVo5836	0	1	0	0	0	9.24	200	1073	1079.5	1076.25	3	1.3	28.4	0.17	37	91.98	14	1	0.188339	1.6569	5.24488	46.4887	89.7933	0.896397	12.7045	93.4093
KnJyVo5836	2020-06-06	202011	G1_8-G1_9	5	29.92	4.67	52.88	140	1582	91.8853	KnJyVo5836	0	1	0	0	0	9.24	200	1073	1079.5	1076.25	3	1.3	28.4	0.17	37	91.98	14	1	0.188339	1.6569	5.24488	46.4887	89.7933	1.11334	12.6068	91.8853
KnJyVo5836	2020-06-06	202012	G1_8-G1_9	6	31	4.33	51.96	134	1611	92.3077	KnJyVo5836	0	1	0	0	0	9.24	200	1073	1079.5	1076.25	3	1.3	28.4	0.17	37	91.98	14	1	0.188339	1.6569	5.24488	46.4887	89.7933	1.03229	12.3874	92.3077
KnJyVo5836	2020-06-06	202101	G1_8-G1_9	7	30.96	4.01	51.77	124	1603	92.811	KnJyVo5836	0	1	0	0	0	9.24	200	1073	1079.5	1076.25	3	1.3	28.4	0.17	37	91.98	14	1	0.188339	1.6569	5.24488	46.4887	89.7933	0.955998	12.3421	92.811
KnJyVo5836	2020-06-06	202102	G1_8-G1_9	8	27.96	3.65	51.28	102	1434	93.3552	KnJyVo5836	0	1	0	0	0	9.24	200	1073	1079.5	1076.25	3	1.3	28.4	0.17	37	91.98	14	1	0.188339	1.6569	5.24488	46.4887	89.7933	0.870173	12.2253	93.3552
KnJyVo5836	2020-06-06	202103	G1_8-G1_9	9	31	3.8	53.57	118	1661	93.3763	KnJyVo5836	0	1	0	0	0	9.24	200	1073	1079.5	1076.25	3	1.3	28.4	0.17	37	91.98	14	1	0.188339	1.6569	5.24488	46.4887	89.7933	0.905933	12.7713	93.3763
KnJyVo5836	2020-06-06	202104	G1_8-G1_9	10	29.96	4.06	53.8	122	1612	92.9831	KnJyVo5836	0	1	0	0	0	9.24	200	1073	1079.5	1076.25	3	1.3	28.4	0.17	37	91.98	14	1	0.188339	1.6569	5.24488	46.4887	89.7933	0.967918	12.8261	92.9831
KnJyVo5836	2020-06-06	202105	G1_8-G1_9	11	30.96	3.96	54.28	122	1680	93.2005	KnJyVo5836	0	1	0	0	0	9.24	200	1073	1079.5	1076.25	3	1.3	28.4	0.17	37	91.98	14	1	0.188339	1.6569	5.24488	46.4887	89.7933	0.944078	12.9405	93.2005
KnJyVo5836	2020-06-06	202106	G1_8-G1_9	12	30	3.97	54.64	119	1639	93.2264	KnJyVo5836	0	1	0	0	0	9.24	200	1073	1079.5	1076.25	3	1.3	28.4	0.17	37	91.98	14	1	0.188339	1.6569	5.24488	46.4887	89.7933	0.946462	13.0264	93.2264
wyZSlM6528	2020-06-26	202007	S1_2-S1_3	1	30.92	3.05	56.73	94	1754	94.898	wyZSlM6528	0	1	0	0	0	9.21	106	806.3	811.5	808.9	1.8	1.2	29.7	0.29	41	53.55	8	1	0.0248952	0.891783	0.755749	27.6071	97.2842	0.13559	2.52198	94.898
wyZSlM6528	2020-06-26	202008	S1_2-S1_3	2	30.94	3.47	51.93	107	1607	93.7365	wyZSlM6528	0	1	0	0	0	9.21	106	806.3	811.5	808.9	1.8	1.2	29.7	0.29	41	53.55	8	1	0.0248952	0.891783	0.755749	27.6071	97.2842	0.154262	2.30859	93.7365
wyZSlM6528	2020-06-26	202009	S1_2-S1_3	3	29.83	3.01	49.66	90	1481	94.2852	wyZSlM6528	0	1	0	0	0	9.21	106	806.3	811.5	808.9	1.8	1.2	29.7	0.29	41	53.55	8	1	0.0248952	0.891783	0.755749	27.6071	97.2842	0.133812	2.20768	94.2852
wyZSlM6528	2020-06-26	202010	S1_2-S1_3	4	30.65	2.91	50.6	89	1551	94.5618	wyZSlM6528	0	1	0	0	0	9.21	106	806.3	811.5	808.9	1.8	1.2	29.7	0.29	41	53.55	8	1	0.0248952	0.891783	0.755749	27.6071	97.2842	0.129366	2.24946	94.5618
wyZSlM6528	2020-06-26	202011	S1_2-S1_3	5	27.75	3.3	67.16	92	1806	95.3165	wyZSlM6528	0	1	0	0	0	9.21	106	806.3	811.5	808.9	1.8	1.2	29.7	0.29	41	53.55	8	1	0.0248952	0.891783	0.755749	27.6071	97.2842	0.146704	2.98565	95.3165
wyZSlM6528	2020-06-26	202012	S1_2-S1_3	6	30.92	3.2	69.07	99	2135	95.5722	wyZSlM6528	0	1	0	0	0	9.21	106	806.3	811.5	808.9	1.8	1.2	29.7	0.29	41	53.55	8	1	0.0248952	0.891783	0.755749	27.6071	97.2842	0.142259	3.07056	95.5722
wyZSlM6528	2020-06-26	202101	S1_2-S1_3	7	30.96	3.36	68.71	104	2127	95.3379	wyZSlM6528	0	1	0	0	0	9.21	106	806.3	811.5	808.9	1.8	1.2	29.7	0.29	41	53.55	8	1	0.0248952	0.891783	0.755749	27.6071	97.2842	0.149371	3.05456	95.3379
wyZSlM6528	2020-06-26	202102	S1_2-S1_3	8	27.94	2.98	65.36	83	1826	95.6394	wyZSlM6528	0	1	0	0	0	9.21	106	806.3	811.5	808.9	1.8	1.2	29.7	0.29	41	53.55	8	1	0.0248952	0.891783	0.755749	27.6071	97.2842	0.132478	2.90563	95.6394
wyZSlM6528	2020-06-26	202103	S1_2-S1_3	9	30.13	2.34	61.84	70	1863	96.354	wyZSlM6528	0	1	0	0	0	9.21	106	806.3	811.5	808.9	1.8	1.2	29.7	0.29	41	53.55	8	1	0.0248952	0.891783	0.755749	27.6071	97.2842	0.104027	2.74915	96.354
wyZSlM6528	2020-06-26	202104	S1_2-S1_3	10	29.83	1.62	63.59	48	1897	97.5157	wyZSlM6528	0	1	0	0	0	9.21	106	806.3	811.5	808.9	1.8	1.2	29.7	0.29	41	53.55	8	1	0.0248952	0.891783	0.755749	27.6071	97.2842	0.0720184	2.82694	97.5157
wyZSlM6528	2020-06-26	202105	S1_2-S1_3	11	30.7	2.1	52	65	1597	96.1183	wyZSlM6528	0	1	0	0	0	9.21	106	806.3	811.5	808.9	1.8	1.2	29.7	0.29	41	53.55	8	1	0.0248952	0.891783	0.755749	27.6071	97.2842	0.0933572	2.3117	96.1183
wyZSlM6528	2020-06-26	202106	S1_2-S1_3	12	29.96	0.86	46.99	26	1408	98.2027	wyZSlM6528	0	1	0	0	0	9.21	106	806.3	811.5	808.9	1.8	1.2	29.7	0.29	41	53.55	8	1	0.0248952	0.891783	0.755749	27.6071	97.2842	0.038232	2.08898	98.2027
wyZSlM6528	2020-06-26	202007	S2_1-S2_4	1	30.92	3.05	56.73	94	1754	94.898	wyZSlM6528	0	1	0	0	0	9.21	106	828.4	845.6	837	8.6	3.6	29.7	0.99	39	59.4	9	1	0.254962	9.13309	7.73991	282.734	97.2842	1.38863	25.8285	94.898
wyZSlM6528	2020-06-26	202008	S2_1-S2_4	2	30.94	3.47	51.93	107	1607	93.7365	wyZSlM6528	0	1	0	0	0	9.21	106	828.4	845.6	837	8.6	3.6	29.7	0.99	39	59.4	9	1	0.254962	9.13309	7.73991	282.734	97.2842	1.57985	23.6431	93.7365
wyZSlM6528	2020-06-26	202009	S2_1-S2_4	3	29.83	3.01	49.66	90	1481	94.2852	wyZSlM6528	0	1	0	0	0	9.21	106	828.4	845.6	837	8.6	3.6	29.7	0.99	39	59.4	9	1	0.254962	9.13309	7.73991	282.734	97.2842	1.37042	22.6096	94.2852
wyZSlM6528	2020-06-26	202010	S2_1-S2_4	4	30.65	2.91	50.6	89	1551	94.5618	wyZSlM6528	0	1	0	0	0	9.21	106	828.4	845.6	837	8.6	3.6	29.7	0.99	39	59.4	9	1	0.254962	9.13309	7.73991	282.734	97.2842	1.32489	23.0376	94.5618
wyZSlM6528	2020-06-26	202011	S2_1-S2_4	5	27.75	3.3	67.16	92	1806	95.3165	wyZSlM6528	0	1	0	0	0	9.21	106	828.4	845.6	837	8.6	3.6	29.7	0.99	39	59.4	9	1	0.254962	9.13309	7.73991	282.734	97.2842	1.50245	30.5772	95.3165
wyZSlM6528	2020-06-26	202012	S2_1-S2_4	6	30.92	3.2	69.07	99	2135	95.5722	wyZSlM6528	0	1	0	0	0	9.21	106	828.4	845.6	837	8.6	3.6	29.7	0.99	39	59.4	9	1	0.254962	9.13309	7.73991	282.734	97.2842	1.45692	31.4468	95.5722
wyZSlM6528	2020-06-26	202101	S2_1-S2_4	7	30.96	3.36	68.71	104	2127	95.3379	wyZSlM6528	0	1	0	0	0	9.21	106	828.4	845.6	837	8.6	3.6	29.7	0.99	39	59.4	9	1	0.254962	9.13309	7.73991	282.734	97.2842	1.52977	31.2829	95.3379
wyZSlM6528	2020-06-26	202102	S2_1-S2_4	8	27.94	2.98	65.36	83	1826	95.6394	wyZSlM6528	0	1	0	0	0	9.21	106	828.4	845.6	837	8.6	3.6	29.7	0.99	39	59.4	9	1	0.254962	9.13309	7.73991	282.734	97.2842	1.35676	29.7577	95.6394
wyZSlM6528	2020-06-26	202103	S2_1-S2_4	9	30.13	2.34	61.84	70	1863	96.354	wyZSlM6528	0	1	0	0	0	9.21	106	828.4	845.6	837	8.6	3.6	29.7	0.99	39	59.4	9	1	0.254962	9.13309	7.73991	282.734	97.2842	1.06538	28.1551	96.354
wyZSlM6528	2020-06-26	202104	S2_1-S2_4	10	29.83	1.62	63.59	48	1897	97.5157	wyZSlM6528	0	1	0	0	0	9.21	106	828.4	845.6	837	8.6	3.6	29.7	0.99	39	59.4	9	1	0.254962	9.13309	7.73991	282.734	97.2842	0.737568	28.9518	97.5157
wyZSlM6528	2020-06-26	202105	S2_1-S2_4	11	30.7	2.1	52	65	1597	96.1183	wyZSlM6528	0	1	0	0	0	9.21	106	828.4	845.6	837	8.6	3.6	29.7	0.99	39	59.4	9	1	0.254962	9.13309	7.73991	282.734	97.2842	0.956106	23.675	96.1183
wyZSlM6528	2020-06-26	202106	S2_1-S2_4	12	29.96	0.86	46.99	26	1408	98.2027	wyZSlM6528	0	1	0	0	0	9.21	106	828.4	845.6	837	8.6	3.6	29.7	0.99	39	59.4	9	1	0.254962	9.13309	7.73991	282.734	97.2842	0.391548	21.394	98.2027
wyZSlM6528	2020-06-26	202007	S2_5+6-S2_12	1	30.92	3.05	56.73	94	1754	94.898	wyZSlM6528	0	1	0	0	0	9.21	106	848.1	871.8	859.95	7.2	4.4	30.4	0.89	39	67.95	9	1	0.280143	10.0351	8.50434	310.659	97.2842	1.52578	28.3795	94.898
wyZSlM6528	2020-06-26	202008	S2_5+6-S2_12	2	30.94	3.47	51.93	107	1607	93.7365	wyZSlM6528	0	1	0	0	0	9.21	106	848.1	871.8	859.95	7.2	4.4	30.4	0.89	39	67.95	9	1	0.280143	10.0351	8.50434	310.659	97.2842	1.73589	25.9783	93.7365
wyZSlM6528	2020-06-26	202009	S2_5+6-S2_12	3	29.83	3.01	49.66	90	1481	94.2852	wyZSlM6528	0	1	0	0	0	9.21	106	848.1	871.8	859.95	7.2	4.4	30.4	0.89	39	67.95	9	1	0.280143	10.0351	8.50434	310.659	97.2842	1.50577	24.8427	94.2852
wyZSlM6528	2020-06-26	202010	S2_5+6-S2_12	4	30.65	2.91	50.6	89	1551	94.5618	wyZSlM6528	0	1	0	0	0	9.21	106	848.1	871.8	859.95	7.2	4.4	30.4	0.89	39	67.95	9	1	0.280143	10.0351	8.50434	310.659	97.2842	1.45574	25.3129	94.5618
wyZSlM6528	2020-06-26	202011	S2_5+6-S2_12	5	27.75	3.3	67.16	92	1806	95.3165	wyZSlM6528	0	1	0	0	0	9.21	106	848.1	871.8	859.95	7.2	4.4	30.4	0.89	39	67.95	9	1	0.280143	10.0351	8.50434	310.659	97.2842	1.65084	33.5972	95.3165
wyZSlM6528	2020-06-26	202012	S2_5+6-S2_12	6	30.92	3.2	69.07	99	2135	95.5722	wyZSlM6528	0	1	0	0	0	9.21	106	848.1	871.8	859.95	7.2	4.4	30.4	0.89	39	67.95	9	1	0.280143	10.0351	8.50434	310.659	97.2842	1.60082	34.5526	95.5722
wyZSlM6528	2020-06-26	202101	S2_5+6-S2_12	7	30.96	3.36	68.71	104	2127	95.3379	wyZSlM6528	0	1	0	0	0	9.21	106	848.1	871.8	859.95	7.2	4.4	30.4	0.89	39	67.95	9	1	0.280143	10.0351	8.50434	310.659	97.2842	1.68086	34.3726	95.3379
wyZSlM6528	2020-06-26	202102	S2_5+6-S2_12	8	27.94	2.98	65.36	83	1826	95.6394	wyZSlM6528	0	1	0	0	0	9.21	106	848.1	871.8	859.95	7.2	4.4	30.4	0.89	39	67.95	9	1	0.280143	10.0351	8.50434	310.659	97.2842	1.49076	32.6967	95.6394
wyZSlM6528	2020-06-26	202103	S2_5+6-S2_12	9	30.13	2.34	61.84	70	1863	96.354	wyZSlM6528	0	1	0	0	0	9.21	106	848.1	871.8	859.95	7.2	4.4	30.4	0.89	39	67.95	9	1	0.280143	10.0351	8.50434	310.659	97.2842	1.1706	30.9358	96.354
wyZSlM6528	2020-06-26	202104	S2_5+6-S2_12	10	29.83	1.62	63.59	48	1897	97.5157	wyZSlM6528	0	1	0	0	0	9.21	106	848.1	871.8	859.95	7.2	4.4	30.4	0.89	39	67.95	9	1	0.280143	10.0351	8.50434	310.659	97.2842	0.810414	31.8112	97.5157
wyZSlM6528	2020-06-26	202105	S2_5+6-S2_12	11	30.7	2.1	52	65	1597	96.1183	wyZSlM6528	0	1	0	0	0	9.21	106	848.1	871.8	859.95	7.2	4.4	30.4	0.89	39	67.95	9	1	0.280143	10.0351	8.50434	310.659	97.2842	1.05054	26.0133	96.1183
wyZSlM6528	2020-06-26	202106	S2_5+6-S2_12	12	29.96	0.86	46.99	26	1408	98.2027	wyZSlM6528	0	1	0	0	0	9.21	106	848.1	871.8	859.95	7.2	4.4	30.4	0.89	39	67.95	9	1	0.280143	10.0351	8.50434	310.659	97.2842	0.43022	23.507	98.2027
EAEKYh2179	2020-06-17	202007	S2_2-3	1	30.83	2.93	48.2	90	1486	94.2695	EAEKYh2179	0	1	0	0	0	8.97	200	765.6	767.5	766.55	1.9	1	29.5	0.505	17	74.2	12	1	0.20362	2.4528	6.31923	76.0648	92.3348	0.685753	11.281	94.2695
EAEKYh2179	2020-06-17	202008	S2_2-3	2	30.92	2.73	49.19	84	1521	94.7419	EAEKYh2179	0	1	0	0	0	8.97	200	765.6	767.5	766.55	1.9	1	29.5	0.505	17	74.2	12	1	0.20362	2.4528	6.31923	76.0648	92.3348	0.638944	11.5127	94.7419
EAEKYh2179	2020-06-17	202009	S2_2-3	3	29.79	2.56	48.52	76	1446	94.9883	EAEKYh2179	0	1	0	0	0	8.97	200	765.6	767.5	766.55	1.9	1	29.5	0.505	17	74.2	12	1	0.20362	2.4528	6.31923	76.0648	92.3348	0.599157	11.3559	94.9883
EAEKYh2179	2020-06-17	202010	S2_2-3	4	30.71	2.25	50.66	69	1556	95.7475	EAEKYh2179	0	1	0	0	0	8.97	200	765.6	767.5	766.55	1.9	1	29.5	0.505	17	74.2	12	1	0.20362	2.4528	6.31923	76.0648	92.3348	0.526602	11.8567	95.7475
EAEKYh2179	2020-06-17	202011	S2_2-3	5	30	0.89	53.58	27	1607	98.3661	EAEKYh2179	0	1	0	0	0	8.97	200	765.6	767.5	766.55	1.9	1	29.5	0.505	17	74.2	12	1	0.20362	2.4528	6.31923	76.0648	92.3348	0.208301	12.5402	98.3661
EAEKYh2179	2020-06-17	202007	S2_8-9-S2_*9	1	30.83	2.93	48.2	90	1486	94.2695	EAEKYh2179	0	1	0	0	0	8.97	200	785.9	789	787.45	1.9	0.9	29.5	0.815	26	74.2	12	1	0.295752	3.56263	9.17852	110.482	92.3348	0.99604	16.3854	94.2695
EAEKYh2179	2020-06-17	202008	S2_8-9-S2_*9	2	30.92	2.73	49.19	84	1521	94.7419	EAEKYh2179	0	1	0	0	0	8.97	200	785.9	789	787.45	1.9	0.9	29.5	0.815	26	74.2	12	1	0.295752	3.56263	9.17852	110.482	92.3348	0.928051	16.7219	94.7419
EAEKYh2179	2020-06-17	202009	S2_8-9-S2_*9	3	29.79	2.56	48.52	76	1446	94.9883	EAEKYh2179	0	1	0	0	0	8.97	200	785.9	789	787.45	1.9	0.9	29.5	0.815	26	74.2	12	1	0.295752	3.56263	9.17852	110.482	92.3348	0.87026	16.4941	94.9883
EAEKYh2179	2020-06-17	202010	S2_8-9-S2_*9	4	30.71	2.25	50.66	69	1556	95.7475	EAEKYh2179	0	1	0	0	0	8.97	200	785.9	789	787.45	1.9	0.9	29.5	0.815	26	74.2	12	1	0.295752	3.56263	9.17852	110.482	92.3348	0.764877	17.2216	95.7475
EAEKYh2179	2020-06-17	202011	S2_8-9-S2_*9	5	30	0.89	53.58	27	1607	98.3661	EAEKYh2179	0	1	0	0	0	8.97	200	785.9	789	787.45	1.9	0.9	29.5	0.815	26	74.2	12	1	0.295752	3.56263	9.17852	110.482	92.3348	0.302551	18.2143	98.3661
EAEKYh2179	2020-06-17	202007	S2_12	1	30.83	2.93	48.2	90	1486	94.2695	EAEKYh2179	0	1	0	0	0	8.97	200	796.8	799.2	798	2.6	0.7	29.5	0.815	27	84.6	13	1	0.23003	2.77093	7.13885	85.9306	92.3348	0.774698	12.7442	94.2695
EAEKYh2179	2020-06-17	202008	S2_12	2	30.92	2.73	49.19	84	1521	94.7419	EAEKYh2179	0	1	0	0	0	8.97	200	796.8	799.2	798	2.6	0.7	29.5	0.815	27	84.6	13	1	0.23003	2.77093	7.13885	85.9306	92.3348	0.721817	13.0059	94.7419
EAEKYh2179	2020-06-17	202009	S2_12	3	29.79	2.56	48.52	76	1446	94.9883	EAEKYh2179	0	1	0	0	0	8.97	200	796.8	799.2	798	2.6	0.7	29.5	0.815	27	84.6	13	1	0.23003	2.77093	7.13885	85.9306	92.3348	0.676869	12.8288	94.9883
EAEKYh2179	2020-06-17	202010	S2_12	4	30.71	2.25	50.66	69	1556	95.7475	EAEKYh2179	0	1	0	0	0	8.97	200	796.8	799.2	798	2.6	0.7	29.5	0.815	27	84.6	13	1	0.23003	2.77093	7.13885	85.9306	92.3348	0.594904	13.3946	95.7475
EAEKYh2179	2020-06-17	202011	S2_12	5	30	0.89	53.58	27	1607	98.3661	EAEKYh2179	0	1	0	0	0	8.97	200	796.8	799.2	798	2.6	0.7	29.5	0.815	27	84.6	13	1	0.23003	2.77093	7.13885	85.9306	92.3348	0.235318	14.1667	98.3661
EAEKYh2179	2020-06-17	202007	S3_1\1	1	30.83	2.93	48.2	90	1486	94.2695	EAEKYh2179	0	1	0	0	0	8.97	200	814.6	815.6	815.1	1.5	0.6	28.3	0.113	26	78.4	12	1	0.0273374	0.329306	0.848403	10.2123	92.3348	0.0920675	1.51456	94.2695
EAEKYh2179	2020-06-17	202008	S3_1\1	2	30.92	2.73	49.19	84	1521	94.7419	EAEKYh2179	0	1	0	0	0	8.97	200	814.6	815.6	815.1	1.5	0.6	28.3	0.113	26	78.4	12	1	0.0273374	0.329306	0.848403	10.2123	92.3348	0.085783	1.54567	94.7419
EAEKYh2179	2020-06-17	202009	S3_1\1	3	29.79	2.56	48.52	76	1446	94.9883	EAEKYh2179	0	1	0	0	0	8.97	200	814.6	815.6	815.1	1.5	0.6	28.3	0.113	26	78.4	12	1	0.0273374	0.329306	0.848403	10.2123	92.3348	0.0804412	1.52461	94.9883
EAEKYh2179	2020-06-17	202010	S3_1\1	4	30.71	2.25	50.66	69	1556	95.7475	EAEKYh2179	0	1	0	0	0	8.97	200	814.6	815.6	815.1	1.5	0.6	28.3	0.113	26	78.4	12	1	0.0273374	0.329306	0.848403	10.2123	92.3348	0.0707003	1.59186	95.7475
EAEKYh2179	2020-06-17	202011	S3_1\1	5	30	0.89	53.58	27	1607	98.3661	EAEKYh2179	0	1	0	0	0	8.97	200	814.6	815.6	815.1	1.5	0.6	28.3	0.113	26	78.4	12	1	0.0273374	0.329306	0.848403	10.2123	92.3348	0.0279659	1.68361	98.3661
EAEKYh2179	2020-06-17	202007	S3_7-S3_8	1	30.83	2.93	48.2	90	1486	94.2695	EAEKYh2179	0	1	0	0	0	8.97	200	834.2	836.1	835.15	1.2	0.3	28.3	0.113	22	69.92	14	1	0.0136687	0.164653	0.424202	5.10613	92.3348	0.0460337	0.757279	94.2695
EAEKYh2179	2020-06-17	202008	S3_7-S3_8	2	30.92	2.73	49.19	84	1521	94.7419	EAEKYh2179	0	1	0	0	0	8.97	200	834.2	836.1	835.15	1.2	0.3	28.3	0.113	22	69.92	14	1	0.0136687	0.164653	0.424202	5.10613	92.3348	0.0428915	0.772833	94.7419
EAEKYh2179	2020-06-17	202009	S3_7-S3_8	3	29.79	2.56	48.52	76	1446	94.9883	EAEKYh2179	0	1	0	0	0	8.97	200	834.2	836.1	835.15	1.2	0.3	28.3	0.113	22	69.92	14	1	0.0136687	0.164653	0.424202	5.10613	92.3348	0.0402206	0.762306	94.9883
EAEKYh2179	2020-06-17	202010	S3_7-S3_8	4	30.71	2.25	50.66	69	1556	95.7475	EAEKYh2179	0	1	0	0	0	8.97	200	834.2	836.1	835.15	1.2	0.3	28.3	0.113	22	69.92	14	1	0.0136687	0.164653	0.424202	5.10613	92.3348	0.0353501	0.795928	95.7475
EAEKYh2179	2020-06-17	202011	S3_7-S3_8	5	30	0.89	53.58	27	1607	98.3661	EAEKYh2179	0	1	0	0	0	8.97	200	834.2	836.1	835.15	1.2	0.3	28.3	0.113	22	69.92	14	1	0.0136687	0.164653	0.424202	5.10613	92.3348	0.0139829	0.841805	98.3661
EAEKYh2179	2020-06-17	202007	S3_9-10	1	30.83	2.93	48.2	90	1486	94.2695	EAEKYh2179	0	1	0	0	0	8.97	200	842.8	849.7	846.25	1.8	1	27.1	0.247	39	96.6	15	1	0.0995922	1.19968	3.09079	37.204	92.3348	0.335408	5.51763	94.2695
EAEKYh2179	2020-06-17	202008	S3_9-10	2	30.92	2.73	49.19	84	1521	94.7419	EAEKYh2179	0	1	0	0	0	8.97	200	842.8	849.7	846.25	1.8	1	27.1	0.247	39	96.6	15	1	0.0995922	1.19968	3.09079	37.204	92.3348	0.312513	5.63096	94.7419
EAEKYh2179	2020-06-17	202009	S3_9-10	3	29.79	2.56	48.52	76	1446	94.9883	EAEKYh2179	0	1	0	0	0	8.97	200	842.8	849.7	846.25	1.8	1	27.1	0.247	39	96.6	15	1	0.0995922	1.19968	3.09079	37.204	92.3348	0.293053	5.55427	94.9883
EAEKYh2179	2020-06-17	202010	S3_9-10	4	30.71	2.25	50.66	69	1556	95.7475	EAEKYh2179	0	1	0	0	0	8.97	200	842.8	849.7	846.25	1.8	1	27.1	0.247	39	96.6	15	1	0.0995922	1.19968	3.09079	37.204	92.3348	0.257566	5.79924	95.7475
EAEKYh2179	2020-06-17	202011	S3_9-10	5	30	0.89	53.58	27	1607	98.3661	EAEKYh2179	0	1	0	0	0	8.97	200	842.8	849.7	846.25	1.8	1	27.1	0.247	39	96.6	15	1	0.0995922	1.19968	3.09079	37.204	92.3348	0.101882	6.1335	98.3661
DQYZKbGp64	2020-06-25	202007	S1_1-S1_4+5	1	30.14	0.99	67.81	30	2044	98.561	DQYZKbGp64	0	1	0	0	0	9.42	100	1129.7	1140	1134.85	2.9	1.2	28.5	0.257	35	67.62	10	1	0.0773611	3.91834	2.32083	121.07	98.0639	0.382937	26.2293	98.561
DQYZKbGp64	2020-06-25	202008	S1_1-S1_4+5	2	30.92	2.36	72.73	73	2249	96.8571	DQYZKbGp64	0	1	0	0	0	9.42	100	1129.7	1140	1134.85	2.9	1.2	28.5	0.257	35	67.62	10	1	0.0773611	3.91834	2.32083	121.07	98.0639	0.912861	28.1324	96.8571
DQYZKbGp64	2020-06-25	202009	S1_1-S1_4+5	3	29.4	2.23	64.83	66	1906	96.6746	DQYZKbGp64	0	1	0	0	0	9.42	100	1129.7	1140	1134.85	2.9	1.2	28.5	0.257	35	67.62	10	1	0.0773611	3.91834	2.32083	121.07	98.0639	0.862576	25.0766	96.6746
DQYZKbGp64	2020-06-25	202010	S1_1-S1_4+5	4	30.6	1.12	48.89	34	1496	97.7604	DQYZKbGp64	0	1	0	0	0	9.42	100	1129.7	1140	1134.85	2.9	1.2	28.5	0.257	35	67.62	10	1	0.0773611	3.91834	2.32083	121.07	98.0639	0.433222	18.9109	97.7604
DQYZKbGp64	2020-06-25	202011	S1_1-S1_4+5	5	29.72	1	44.88	30	1334	97.8204	DQYZKbGp64	0	1	0	0	0	9.42	100	1129.7	1140	1134.85	2.9	1.2	28.5	0.257	35	67.62	10	1	0.0773611	3.91834	2.32083	121.07	98.0639	0.386805	17.3598	97.8204
DQYZKbGp64	2020-06-25	202012	S1_1-S1_4+5	6	30.92	1.06	47.1	33	1456	97.799	DQYZKbGp64	0	1	0	0	0	9.42	100	1129.7	1140	1134.85	2.9	1.2	28.5	0.257	35	67.62	10	1	0.0773611	3.91834	2.32083	121.07	98.0639	0.410014	18.2185	97.799
DQYZKbGp64	2020-06-25	202101	S1_1-S1_4+5	7	30.99	0.95	40.64	29	1259	97.7158	DQYZKbGp64	0	1	0	0	0	9.42	100	1129.7	1140	1134.85	2.9	1.2	28.5	0.257	35	67.62	10	1	0.0773611	3.91834	2.32083	121.07	98.0639	0.367465	15.7198	97.7158
DQYZKbGp64	2020-06-25	202102	S1_1-S1_4+5	8	28	1.12	38.75	31	1085	97.1909	DQYZKbGp64	0	1	0	0	0	9.42	100	1129.7	1140	1134.85	2.9	1.2	28.5	0.257	35	67.62	10	1	0.0773611	3.91834	2.32083	121.07	98.0639	0.433222	14.9887	97.1909
DQYZKbGp64	2020-06-25	202103	S1_1-S1_4+5	9	30.79	1.13	40.74	35	1254	97.3012	DQYZKbGp64	0	1	0	0	0	9.42	100	1129.7	1140	1134.85	2.9	1.2	28.5	0.257	35	67.62	10	1	0.0773611	3.91834	2.32083	121.07	98.0639	0.43709	15.7585	97.3012
DQYZKbGp64	2020-06-25	202104	S1_1-S1_4+5	10	29.56	0.71	30.71	21	908	97.7403	DQYZKbGp64	0	1	0	0	0	9.42	100	1129.7	1140	1134.85	2.9	1.2	28.5	0.257	35	67.62	10	1	0.0773611	3.91834	2.32083	121.07	98.0639	0.274632	11.8788	97.7403
DQYZKbGp64	2020-06-25	202105	S1_1-S1_4+5	11	30.97	0.84	29.99	26	929	97.2754	DQYZKbGp64	0	1	0	0	0	9.42	100	1129.7	1140	1134.85	2.9	1.2	28.5	0.257	35	67.62	10	1	0.0773611	3.91834	2.32083	121.07	98.0639	0.324917	11.6003	97.2754
DQYZKbGp64	2020-06-25	202106	S1_1-S1_4+5	12	29.94	1.13	30.19	34	904	96.3921	DQYZKbGp64	0	1	0	0	0	9.42	100	1129.7	1140	1134.85	2.9	1.2	28.5	0.257	35	67.62	10	1	0.0773611	3.91834	2.32083	121.07	98.0639	0.43709	11.6777	96.3921
DQYZKbGp64	2020-06-25	202007	S2_1-S2_2	1	30.14	0.99	67.81	30	2044	98.561	DQYZKbGp64	0	1	0	0	0	9.42	100	1153.5	1162.6	1158.05	1.2	0.5	27.2	0.223	40	67.8	10	1	0.0279694	1.41665	0.839082	43.7721	98.0639	0.138449	9.48302	98.561
DQYZKbGp64	2020-06-25	202008	S2_1-S2_2	2	30.92	2.36	72.73	73	2249	96.8571	DQYZKbGp64	0	1	0	0	0	9.42	100	1153.5	1162.6	1158.05	1.2	0.5	27.2	0.223	40	67.8	10	1	0.0279694	1.41665	0.839082	43.7721	98.0639	0.330039	10.1711	96.8571
DQYZKbGp64	2020-06-25	202009	S2_1-S2_2	3	29.4	2.23	64.83	66	1906	96.6746	DQYZKbGp64	0	1	0	0	0	9.42	100	1153.5	1162.6	1158.05	1.2	0.5	27.2	0.223	40	67.8	10	1	0.0279694	1.41665	0.839082	43.7721	98.0639	0.311859	9.06628	96.6746
DQYZKbGp64	2020-06-25	202010	S2_1-S2_2	4	30.6	1.12	48.89	34	1496	97.7604	DQYZKbGp64	0	1	0	0	0	9.42	100	1153.5	1162.6	1158.05	1.2	0.5	27.2	0.223	40	67.8	10	1	0.0279694	1.41665	0.839082	43.7721	98.0639	0.156629	6.83712	97.7604
DQYZKbGp64	2020-06-25	202011	S2_1-S2_2	5	29.72	1	44.88	30	1334	97.8204	DQYZKbGp64	0	1	0	0	0	9.42	100	1153.5	1162.6	1158.05	1.2	0.5	27.2	0.223	40	67.8	10	1	0.0279694	1.41665	0.839082	43.7721	98.0639	0.139847	6.27633	97.8204
DQYZKbGp64	2020-06-25	202012	S2_1-S2_2	6	30.92	1.06	47.1	33	1456	97.799	DQYZKbGp64	0	1	0	0	0	9.42	100	1153.5	1162.6	1158.05	1.2	0.5	27.2	0.223	40	67.8	10	1	0.0279694	1.41665	0.839082	43.7721	98.0639	0.148238	6.58679	97.799
DQYZKbGp64	2020-06-25	202101	S2_1-S2_2	7	30.99	0.95	40.64	29	1259	97.7158	DQYZKbGp64	0	1	0	0	0	9.42	100	1153.5	1162.6	1158.05	1.2	0.5	27.2	0.223	40	67.8	10	1	0.0279694	1.41665	0.839082	43.7721	98.0639	0.132855	5.68338	97.7158
DQYZKbGp64	2020-06-25	202102	S2_1-S2_2	8	28	1.12	38.75	31	1085	97.1909	DQYZKbGp64	0	1	0	0	0	9.42	100	1153.5	1162.6	1158.05	1.2	0.5	27.2	0.223	40	67.8	10	1	0.0279694	1.41665	0.839082	43.7721	98.0639	0.156629	5.41907	97.1909
DQYZKbGp64	2020-06-25	202103	S2_1-S2_2	9	30.79	1.13	40.74	35	1254	97.3012	DQYZKbGp64	0	1	0	0	0	9.42	100	1153.5	1162.6	1158.05	1.2	0.5	27.2	0.223	40	67.8	10	1	0.0279694	1.41665	0.839082	43.7721	98.0639	0.158027	5.69737	97.3012
DQYZKbGp64	2020-06-25	202104	S2_1-S2_2	10	29.56	0.71	30.71	21	908	97.7403	DQYZKbGp64	0	1	0	0	0	9.42	100	1153.5	1162.6	1158.05	1.2	0.5	27.2	0.223	40	67.8	10	1	0.0279694	1.41665	0.839082	43.7721	98.0639	0.0992914	4.2947	97.7403
DQYZKbGp64	2020-06-25	202105	S2_1-S2_2	11	30.97	0.84	29.99	26	929	97.2754	DQYZKbGp64	0	1	0	0	0	9.42	100	1153.5	1162.6	1158.05	1.2	0.5	27.2	0.223	40	67.8	10	1	0.0279694	1.41665	0.839082	43.7721	98.0639	0.117471	4.19401	97.2754
DQYZKbGp64	2020-06-25	202106	S2_1-S2_2	12	29.94	1.13	30.19	34	904	96.3921	DQYZKbGp64	0	1	0	0	0	9.42	100	1153.5	1162.6	1158.05	1.2	0.5	27.2	0.223	40	67.8	10	1	0.0279694	1.41665	0.839082	43.7721	98.0639	0.158027	4.22198	96.3921
DQYZKbGp64	2020-06-25	202007	S2_4-S2_5+6	1	30.14	0.99	67.81	30	2044	98.561	DQYZKbGp64	0	1	0	0	0	9.42	100	1170.1	1172.5	1171.3	2	0.2	26.7	0.112	0	0	0	1	0.00561896	0.284601	0.168569	8.79368	98.0639	0.0278139	1.90511	98.561
DQYZKbGp64	2020-06-25	202008	S2_4-S2_5+6	2	30.92	2.36	72.73	73	2249	96.8571	DQYZKbGp64	0	1	0	0	0	9.42	100	1170.1	1172.5	1171.3	2	0.2	26.7	0.112	0	0	0	1	0.00561896	0.284601	0.168569	8.79368	98.0639	0.0663038	2.04334	96.8571
DQYZKbGp64	2020-06-25	202009	S2_4-S2_5+6	3	29.4	2.23	64.83	66	1906	96.6746	DQYZKbGp64	0	1	0	0	0	9.42	100	1170.1	1172.5	1171.3	2	0.2	26.7	0.112	0	0	0	1	0.00561896	0.284601	0.168569	8.79368	98.0639	0.0626514	1.82139	96.6746
DQYZKbGp64	2020-06-25	202010	S2_4-S2_5+6	4	30.6	1.12	48.89	34	1496	97.7604	DQYZKbGp64	0	1	0	0	0	9.42	100	1170.1	1172.5	1171.3	2	0.2	26.7	0.112	0	0	0	1	0.00561896	0.284601	0.168569	8.79368	98.0639	0.0314662	1.37356	97.7604
DQYZKbGp64	2020-06-25	202011	S2_4-S2_5+6	5	29.72	1	44.88	30	1334	97.8204	DQYZKbGp64	0	1	0	0	0	9.42	100	1170.1	1172.5	1171.3	2	0.2	26.7	0.112	0	0	0	1	0.00561896	0.284601	0.168569	8.79368	98.0639	0.0280948	1.2609	97.8204
DQYZKbGp64	2020-06-25	202012	S2_4-S2_5+6	6	30.92	1.06	47.1	33	1456	97.799	DQYZKbGp64	0	1	0	0	0	9.42	100	1170.1	1172.5	1171.3	2	0.2	26.7	0.112	0	0	0	1	0.00561896	0.284601	0.168569	8.79368	98.0639	0.0297805	1.32327	97.799
DQYZKbGp64	2020-06-25	202101	S2_4-S2_5+6	7	30.99	0.95	40.64	29	1259	97.7158	DQYZKbGp64	0	1	0	0	0	9.42	100	1170.1	1172.5	1171.3	2	0.2	26.7	0.112	0	0	0	1	0.00561896	0.284601	0.168569	8.79368	98.0639	0.0266901	1.14177	97.7158
DQYZKbGp64	2020-06-25	202102	S2_4-S2_5+6	8	28	1.12	38.75	31	1085	97.1909	DQYZKbGp64	0	1	0	0	0	9.42	100	1170.1	1172.5	1171.3	2	0.2	26.7	0.112	0	0	0	1	0.00561896	0.284601	0.168569	8.79368	98.0639	0.0314662	1.08867	97.1909
DQYZKbGp64	2020-06-25	202103	S2_4-S2_5+6	9	30.79	1.13	40.74	35	1254	97.3012	DQYZKbGp64	0	1	0	0	0	9.42	100	1170.1	1172.5	1171.3	2	0.2	26.7	0.112	0	0	0	1	0.00561896	0.284601	0.168569	8.79368	98.0639	0.0317471	1.14458	97.3012
DQYZKbGp64	2020-06-25	202104	S2_4-S2_5+6	10	29.56	0.71	30.71	21	908	97.7403	DQYZKbGp64	0	1	0	0	0	9.42	100	1170.1	1172.5	1171.3	2	0.2	26.7	0.112	0	0	0	1	0.00561896	0.284601	0.168569	8.79368	98.0639	0.0199473	0.862792	97.7403
DQYZKbGp64	2020-06-25	202105	S2_4-S2_5+6	11	30.97	0.84	29.99	26	929	97.2754	DQYZKbGp64	0	1	0	0	0	9.42	100	1170.1	1172.5	1171.3	2	0.2	26.7	0.112	0	0	0	1	0.00561896	0.284601	0.168569	8.79368	98.0639	0.0235996	0.842564	97.2754
DQYZKbGp64	2020-06-25	202106	S2_4-S2_5+6	12	29.94	1.13	30.19	34	904	96.3921	DQYZKbGp64	0	1	0	0	0	9.42	100	1170.1	1172.5	1171.3	2	0.2	26.7	0.112	0	0	0	1	0.00561896	0.284601	0.168569	8.79368	98.0639	0.0317471	0.848183	96.3921
DQYZKbGp64	2020-06-25	202007	S3_5+6-S3_7	1	30.14	0.99	67.81	30	2044	98.561	DQYZKbGp64	0	1	0	0	0	9.42	100	1224	1229.6	1226.8	2.6	1	28.8	0.355	34	69.72	11	1	0.0890505	4.51041	2.67152	139.364	98.0639	0.4408	30.1926	98.561
DQYZKbGp64	2020-06-25	202008	S3_5+6-S3_7	2	30.92	2.36	72.73	73	2249	96.8571	DQYZKbGp64	0	1	0	0	0	9.42	100	1224	1229.6	1226.8	2.6	1	28.8	0.355	34	69.72	11	1	0.0890505	4.51041	2.67152	139.364	98.0639	1.0508	32.3832	96.8571
DQYZKbGp64	2020-06-25	202009	S3_5+6-S3_7	3	29.4	2.23	64.83	66	1906	96.6746	DQYZKbGp64	0	1	0	0	0	9.42	100	1224	1229.6	1226.8	2.6	1	28.8	0.355	34	69.72	11	1	0.0890505	4.51041	2.67152	139.364	98.0639	0.992914	28.8657	96.6746
DQYZKbGp64	2020-06-25	202010	S3_5+6-S3_7	4	30.6	1.12	48.89	34	1496	97.7604	DQYZKbGp64	0	1	0	0	0	9.42	100	1224	1229.6	1226.8	2.6	1	28.8	0.355	34	69.72	11	1	0.0890505	4.51041	2.67152	139.364	98.0639	0.498683	21.7684	97.7604
DQYZKbGp64	2020-06-25	202011	S3_5+6-S3_7	5	29.72	1	44.88	30	1334	97.8204	DQYZKbGp64	0	1	0	0	0	9.42	100	1224	1229.6	1226.8	2.6	1	28.8	0.355	34	69.72	11	1	0.0890505	4.51041	2.67152	139.364	98.0639	0.445253	19.9829	97.8204
DQYZKbGp64	2020-06-25	202012	S3_5+6-S3_7	6	30.92	1.06	47.1	33	1456	97.799	DQYZKbGp64	0	1	0	0	0	9.42	100	1224	1229.6	1226.8	2.6	1	28.8	0.355	34	69.72	11	1	0.0890505	4.51041	2.67152	139.364	98.0639	0.471968	20.9714	97.799
DQYZKbGp64	2020-06-25	202101	S3_5+6-S3_7	7	30.99	0.95	40.64	29	1259	97.7158	DQYZKbGp64	0	1	0	0	0	9.42	100	1224	1229.6	1226.8	2.6	1	28.8	0.355	34	69.72	11	1	0.0890505	4.51041	2.67152	139.364	98.0639	0.42299	18.0951	97.7158
DQYZKbGp64	2020-06-25	202102	S3_5+6-S3_7	8	28	1.12	38.75	31	1085	97.1909	DQYZKbGp64	0	1	0	0	0	9.42	100	1224	1229.6	1226.8	2.6	1	28.8	0.355	34	69.72	11	1	0.0890505	4.51041	2.67152	139.364	98.0639	0.498683	17.2535	97.1909
DQYZKbGp64	2020-06-25	202103	S3_5+6-S3_7	9	30.79	1.13	40.74	35	1254	97.3012	DQYZKbGp64	0	1	0	0	0	9.42	100	1224	1229.6	1226.8	2.6	1	28.8	0.355	34	69.72	11	1	0.0890505	4.51041	2.67152	139.364	98.0639	0.503136	18.1396	97.3012
DQYZKbGp64	2020-06-25	202104	S3_5+6-S3_7	10	29.56	0.71	30.71	21	908	97.7403	DQYZKbGp64	0	1	0	0	0	9.42	100	1224	1229.6	1226.8	2.6	1	28.8	0.355	34	69.72	11	1	0.0890505	4.51041	2.67152	139.364	98.0639	0.316129	13.6737	97.7403
DQYZKbGp64	2020-06-25	202105	S3_5+6-S3_7	11	30.97	0.84	29.99	26	929	97.2754	DQYZKbGp64	0	1	0	0	0	9.42	100	1224	1229.6	1226.8	2.6	1	28.8	0.355	34	69.72	11	1	0.0890505	4.51041	2.67152	139.364	98.0639	0.374012	13.3531	97.2754
DQYZKbGp64	2020-06-25	202106	S3_5+6-S3_7	12	29.94	1.13	30.19	34	904	96.3921	DQYZKbGp64	0	1	0	0	0	9.42	100	1224	1229.6	1226.8	2.6	1	28.8	0.355	34	69.72	11	1	0.0890505	4.51041	2.67152	139.364	98.0639	0.503136	13.4422	96.3921
DQuw0vqSg7	2020-06-30	202007	G1_6+7-G1_8_1	1	28	8.86	39.76	248	1113	81.777	DQuw0vqSg7	0	1	0	0	0	8.08	175	1164.9	1172.2	1168.55	6.5	2.4	27.8	0.301	29	162	25	2	0.653551	4.30632	20.383	133.622	86.8232	2.86656	12.8639	81.777
DQuw0vqSg7	2020-06-30	202008	G1_6+7-G1_8_1	2	30.98	7.07	28.73	219	890	80.2514	DQuw0vqSg7	0	1	0	0	0	8.08	175	1164.9	1172.2	1168.55	6.5	2.4	27.8	0.301	29	162	25	2	0.653551	4.30632	20.383	133.622	86.8232	2.28743	9.2953	80.2514
DQuw0vqSg7	2020-06-30	202009	G1_6+7-G1_8_1	3	29.98	4.08	17	122	510	80.6452	DQuw0vqSg7	0	1	0	0	0	8.08	175	1164.9	1172.2	1168.55	6.5	2.4	27.8	0.301	29	162	25	2	0.653551	4.30632	20.383	133.622	86.8232	1.32004	5.50018	80.6452
DQuw0vqSg7	2020-06-30	202010	G1_6+7-G1_8_1	4	28	3.29	14.34	92	402	81.3386	DQuw0vqSg7	0	1	0	0	0	8.08	175	1164.9	1172.2	1168.55	6.5	2.4	27.8	0.301	29	162	25	2	0.653551	4.30632	20.383	133.622	86.8232	1.06445	4.63956	81.3386
DQuw0vqSg7	2020-06-30	202012	G1_6+7-G1_8_1	5	31	3.24	14.68	101	455	81.9196	DQuw0vqSg7	0	1	0	0	0	8.08	175	1164.9	1172.2	1168.55	6.5	2.4	27.8	0.301	29	162	25	2	0.653551	4.30632	20.383	133.622	86.8232	1.04827	4.74957	81.9196
DQuw0vqSg7	2020-06-30	202101	G1_6+7-G1_8_1	6	30.98	4.77	21.94	148	680	82.1415	DQuw0vqSg7	0	1	0	0	0	8.08	175	1164.9	1172.2	1168.55	6.5	2.4	27.8	0.301	29	162	25	2	0.653551	4.30632	20.383	133.622	86.8232	1.54329	7.09847	82.1415
DQuw0vqSg7	2020-06-30	202102	G1_6+7-G1_8_1	7	27.98	3.34	16.18	93	453	82.8893	DQuw0vqSg7	0	1	0	0	0	8.08	175	1164.9	1172.2	1168.55	6.5	2.4	27.8	0.301	29	162	25	2	0.653551	4.30632	20.383	133.622	86.8232	1.08062	5.23488	82.8893
DQuw0vqSg7	2020-06-30	202104	G1_6+7-G1_8_1	8	30	3.31	18.03	99	541	84.4892	DQuw0vqSg7	0	1	0	0	0	8.08	175	1164.9	1172.2	1168.55	6.5	2.4	27.8	0.301	29	162	25	2	0.653551	4.30632	20.383	133.622	86.8232	1.07092	5.83343	84.4892
DQuw0vqSg7	2020-06-30	202105	G1_6+7-G1_8_1	9	30.96	2.44	13.53	75	419	84.7214	DQuw0vqSg7	0	1	0	0	0	8.08	175	1164.9	1172.2	1168.55	6.5	2.4	27.8	0.301	29	162	25	2	0.653551	4.30632	20.383	133.622	86.8232	0.789437	4.3775	84.7214
DQuw0vqSg7	2020-06-30	202106	G1_6+7-G1_8_1	10	11.17	2.14	12.65	24	141	85.5308	DQuw0vqSg7	0	1	0	0	0	8.08	175	1164.9	1172.2	1168.55	6.5	2.4	27.8	0.301	29	162	25	2	0.653551	4.30632	20.383	133.622	86.8232	0.692375	4.09278	85.5308
DQuw0vqSg7	2020-06-30	202007	G1_14-G1_18	1	28	8.86	39.76	248	1113	81.777	DQuw0vqSg7	0	1	0	0	0	8.08	175	1189	1197.7	1193.35	6	3.2	28.5	0.289	49	162	25	2	0.836661	5.51285	26.0939	171.06	86.8232	3.66971	16.4681	81.777
DQuw0vqSg7	2020-06-30	202008	G1_14-G1_18	2	30.98	7.07	28.73	219	890	80.2514	DQuw0vqSg7	0	1	0	0	0	8.08	175	1189	1197.7	1193.35	6	3.2	28.5	0.289	49	162	25	2	0.836661	5.51285	26.0939	171.06	86.8232	2.92831	11.8996	80.2514
DQuw0vqSg7	2020-06-30	202009	G1_14-G1_18	3	29.98	4.08	17	122	510	80.6452	DQuw0vqSg7	0	1	0	0	0	8.08	175	1189	1197.7	1193.35	6	3.2	28.5	0.289	49	162	25	2	0.836661	5.51285	26.0939	171.06	86.8232	1.68989	7.0412	80.6452
DQuw0vqSg7	2020-06-30	202010	G1_14-G1_18	4	28	3.29	14.34	92	402	81.3386	DQuw0vqSg7	0	1	0	0	0	8.08	175	1189	1197.7	1193.35	6	3.2	28.5	0.289	49	162	25	2	0.836661	5.51285	26.0939	171.06	86.8232	1.36268	5.93946	81.3386
DQuw0vqSg7	2020-06-30	202012	G1_14-G1_18	5	31	3.24	14.68	101	455	81.9196	DQuw0vqSg7	0	1	0	0	0	8.08	175	1189	1197.7	1193.35	6	3.2	28.5	0.289	49	162	25	2	0.836661	5.51285	26.0939	171.06	86.8232	1.34197	6.08029	81.9196
DQuw0vqSg7	2020-06-30	202101	G1_14-G1_18	6	30.98	4.77	21.94	148	680	82.1415	DQuw0vqSg7	0	1	0	0	0	8.08	175	1189	1197.7	1193.35	6	3.2	28.5	0.289	49	162	25	2	0.836661	5.51285	26.0939	171.06	86.8232	1.97568	9.08729	82.1415
DQuw0vqSg7	2020-06-30	202102	G1_14-G1_18	7	27.98	3.34	16.18	93	453	82.8893	DQuw0vqSg7	0	1	0	0	0	8.08	175	1189	1197.7	1193.35	6	3.2	28.5	0.289	49	162	25	2	0.836661	5.51285	26.0939	171.06	86.8232	1.38339	6.70157	82.8893
DQuw0vqSg7	2020-06-30	202104	G1_14-G1_18	8	30	3.31	18.03	99	541	84.4892	DQuw0vqSg7	0	1	0	0	0	8.08	175	1189	1197.7	1193.35	6	3.2	28.5	0.289	49	162	25	2	0.836661	5.51285	26.0939	171.06	86.8232	1.37096	7.46782	84.4892
DQuw0vqSg7	2020-06-30	202105	G1_14-G1_18	9	30.96	2.44	13.53	75	419	84.7214	DQuw0vqSg7	0	1	0	0	0	8.08	175	1189	1197.7	1193.35	6	3.2	28.5	0.289	49	162	25	2	0.836661	5.51285	26.0939	171.06	86.8232	1.01062	5.60397	84.7214
DQuw0vqSg7	2020-06-30	202106	G1_14-G1_18	10	11.17	2.14	12.65	24	141	85.5308	DQuw0vqSg7	0	1	0	0	0	8.08	175	1189	1197.7	1193.35	6	3.2	28.5	0.289	49	162	25	2	0.836661	5.51285	26.0939	171.06	86.8232	0.886363	5.23948	85.5308
DQjem3HoVy	2020-06-10	202007	G2_27-G2_31_1	1	30.92	3.65	67.67	113	2092	94.8822	DQjem3HoVy	0	1	0	0	0	9.03	212	1169.3	1178.7	1174	5.6	2.4	27.1	0.154	29	155	27	2	0.477155	11.7758	14.7048	364.918	96.1058	1.09536	20.3076	94.8822
DQjem3HoVy	2020-06-10	202008	G2_27-G2_31_1	2	30.75	2.52	49.68	77	1528	95.1724	DQjem3HoVy	0	1	0	0	0	9.03	212	1169.3	1178.7	1174	5.6	2.4	27.1	0.154	29	155	27	2	0.477155	11.7758	14.7048	364.918	96.1058	0.756246	14.9088	95.1724
DQjem3HoVy	2020-06-10	202009	G2_27-G2_31_1	3	28.42	2.9	52.06	83	1479	94.7234	DQjem3HoVy	0	1	0	0	0	9.03	212	1169.3	1178.7	1174	5.6	2.4	27.1	0.154	29	155	27	2	0.477155	11.7758	14.7048	364.918	96.1058	0.870283	15.6231	94.7234
DQjem3HoVy	2020-06-10	202010	G2_27-G2_31_1	4	30.74	2.45	49.37	75	1518	95.2721	DQjem3HoVy	0	1	0	0	0	9.03	212	1169.3	1178.7	1174	5.6	2.4	27.1	0.154	29	155	27	2	0.477155	11.7758	14.7048	364.918	96.1058	0.735239	14.8158	95.2721
DQjem3HoVy	2020-06-10	202011	G2_27-G2_31_1	5	29.92	2.53	39.59	76	1184	93.9934	DQjem3HoVy	0	1	0	0	0	9.03	212	1169.3	1178.7	1174	5.6	2.4	27.1	0.154	29	155	27	2	0.477155	11.7758	14.7048	364.918	96.1058	0.759247	11.8809	93.9934
DQjem3HoVy	2020-06-10	202012	G2_27-G2_31_1	6	31	2.33	37.52	72	1163	94.1531	DQjem3HoVy	0	1	0	0	0	9.03	212	1169.3	1178.7	1174	5.6	2.4	27.1	0.154	29	155	27	2	0.477155	11.7758	14.7048	364.918	96.1058	0.699227	11.2597	94.1531
DQjem3HoVy	2020-06-10	202101	G2_27-G2_31_1	7	31	2.04	34.53	63	1070	94.4217	DQjem3HoVy	0	1	0	0	0	9.03	212	1169.3	1178.7	1174	5.6	2.4	27.1	0.154	29	155	27	2	0.477155	11.7758	14.7048	364.918	96.1058	0.612199	10.3624	94.4217
DQjem3HoVy	2020-06-10	202102	G2_27-G2_31_1	8	28	2.37	30.97	66	867	92.8914	DQjem3HoVy	0	1	0	0	0	9.03	212	1169.3	1178.7	1174	5.6	2.4	27.1	0.154	29	155	27	2	0.477155	11.7758	14.7048	364.918	96.1058	0.711231	9.29402	92.8914
DQjem3HoVy	2020-06-10	202103	G2_27-G2_31_1	9	31	2.03	27.49	63	852	93.1233	DQjem3HoVy	0	1	0	0	0	9.03	212	1169.3	1178.7	1174	5.6	2.4	27.1	0.154	29	155	27	2	0.477155	11.7758	14.7048	364.918	96.1058	0.609198	8.24968	93.1233
DQjem3HoVy	2020-06-10	202104	G2_27-G2_31_1	10	30	2	29.05	60	872	93.5588	DQjem3HoVy	0	1	0	0	0	9.03	212	1169.3	1178.7	1174	5.6	2.4	27.1	0.154	29	155	27	2	0.477155	11.7758	14.7048	364.918	96.1058	0.600195	8.71783	93.5588
DQjem3HoVy	2020-06-10	202105	G2_27-G2_31_1	11	30.5	1.74	29.85	53	910	94.4919	DQjem3HoVy	0	1	0	0	0	9.03	212	1169.3	1178.7	1174	5.6	2.4	27.1	0.154	29	155	27	2	0.477155	11.7758	14.7048	364.918	96.1058	0.52217	8.95791	94.4919
DQjem3HoVy	2020-06-10	202007	G2_34-G3_3	1	30.92	3.65	67.67	113	2092	94.8822	DQjem3HoVy	0	1	0	0	0	9.03	212	1187.3	1197.5	1192.4	7.6	3.3	27.8	0.156	33	150	25	2	0.664609	16.402	20.4816	508.279	96.1058	1.52567	28.2856	94.8822
DQjem3HoVy	2020-06-10	202008	G2_34-G3_3	2	30.75	2.52	49.68	77	1528	95.1724	DQjem3HoVy	0	1	0	0	0	9.03	212	1187.3	1197.5	1192.4	7.6	3.3	27.8	0.156	33	150	25	2	0.664609	16.402	20.4816	508.279	96.1058	1.05334	20.7659	95.1724
DQjem3HoVy	2020-06-10	202009	G2_34-G3_3	3	28.42	2.9	52.06	83	1479	94.7234	DQjem3HoVy	0	1	0	0	0	9.03	212	1187.3	1197.5	1192.4	7.6	3.3	27.8	0.156	33	150	25	2	0.664609	16.402	20.4816	508.279	96.1058	1.21218	21.7607	94.7234
DQjem3HoVy	2020-06-10	202010	G2_34-G3_3	4	30.74	2.45	49.37	75	1518	95.2721	DQjem3HoVy	0	1	0	0	0	9.03	212	1187.3	1197.5	1192.4	7.6	3.3	27.8	0.156	33	150	25	2	0.664609	16.402	20.4816	508.279	96.1058	1.02408	20.6363	95.2721
DQjem3HoVy	2020-06-10	202011	G2_34-G3_3	5	29.92	2.53	39.59	76	1184	93.9934	DQjem3HoVy	0	1	0	0	0	9.03	212	1187.3	1197.5	1192.4	7.6	3.3	27.8	0.156	33	150	25	2	0.664609	16.402	20.4816	508.279	96.1058	1.05752	16.5483	93.9934
DQjem3HoVy	2020-06-10	202012	G2_34-G3_3	6	31	2.33	37.52	72	1163	94.1531	DQjem3HoVy	0	1	0	0	0	9.03	212	1187.3	1197.5	1192.4	7.6	3.3	27.8	0.156	33	150	25	2	0.664609	16.402	20.4816	508.279	96.1058	0.973923	15.6831	94.1531
DQjem3HoVy	2020-06-10	202101	G2_34-G3_3	7	31	2.04	34.53	63	1070	94.4217	DQjem3HoVy	0	1	0	0	0	9.03	212	1187.3	1197.5	1192.4	7.6	3.3	27.8	0.156	33	150	25	2	0.664609	16.402	20.4816	508.279	96.1058	0.852705	14.4333	94.4217
DQjem3HoVy	2020-06-10	202102	G2_34-G3_3	8	28	2.37	30.97	66	867	92.8914	DQjem3HoVy	0	1	0	0	0	9.03	212	1187.3	1197.5	1192.4	7.6	3.3	27.8	0.156	33	150	25	2	0.664609	16.402	20.4816	508.279	96.1058	0.990643	12.9452	92.8914
DQjem3HoVy	2020-06-10	202103	G2_34-G3_3	9	31	2.03	27.49	63	852	93.1233	DQjem3HoVy	0	1	0	0	0	9.03	212	1187.3	1197.5	1192.4	7.6	3.3	27.8	0.156	33	150	25	2	0.664609	16.402	20.4816	508.279	96.1058	0.848525	11.4906	93.1233
DQjem3HoVy	2020-06-10	202104	G2_34-G3_3	10	30	2	29.05	60	872	93.5588	DQjem3HoVy	0	1	0	0	0	9.03	212	1187.3	1197.5	1192.4	7.6	3.3	27.8	0.156	33	150	25	2	0.664609	16.402	20.4816	508.279	96.1058	0.835986	12.1427	93.5588
DQjem3HoVy	2020-06-10	202105	G2_34-G3_3	11	30.5	1.74	29.85	53	910	94.4919	DQjem3HoVy	0	1	0	0	0	9.03	212	1187.3	1197.5	1192.4	7.6	3.3	27.8	0.156	33	150	25	2	0.664609	16.402	20.4816	508.279	96.1058	0.727308	12.4771	94.4919
TTGgwG9719	2020-07-17	202008	G2_8-G2_14_1	1	30.96	5.19	30.35	161	940	85.3967	TTGgwG9719	0	1	0	0	0	10.2	300	989.8	1000.8	995.3	7.7	4.8	0	0.185	29	58.56	8.5	1	2.35785	13.8668	70.6744	414.908	85.4675	3.16207	18.4911	85.3967
TTGgwG9719	2020-07-17	202009	G2_8-G2_14_1	2	26.75	7	37.01	187	990	84.0945	TTGgwG9719	0	1	0	0	0	10.2	300	989.8	1000.8	995.3	7.7	4.8	0	0.185	29	58.56	8.5	1	2.35785	13.8668	70.6744	414.908	85.4675	4.26484	22.5488	84.0945
TTGgwG9719	2020-07-17	202010	G2_8-G2_14_1	3	30.85	6.98	36.13	215	1115	83.8089	TTGgwG9719	0	1	0	0	0	10.2	300	989.8	1000.8	995.3	7.7	4.8	0	0.185	29	58.56	8.5	1	2.35785	13.8668	70.6744	414.908	85.4675	4.25265	22.0127	83.8089
TTGgwG9719	2020-07-17	202011	G2_8-G2_14_1	4	29.92	5.44	35.85	163	1072	86.8249	TTGgwG9719	0	1	0	0	0	10.2	300	989.8	1000.8	995.3	7.7	4.8	0	0.185	29	58.56	8.5	1	2.35785	13.8668	70.6744	414.908	85.4675	3.31439	21.8421	86.8249
TTGgwG9719	2020-07-17	202012	G2_8-G2_14_1	5	30.92	5.83	37.76	180	1168	86.6254	TTGgwG9719	0	1	0	0	0	10.2	300	989.8	1000.8	995.3	7.7	4.8	0	0.185	29	58.56	8.5	1	2.35785	13.8668	70.6744	414.908	85.4675	3.552	23.0057	86.6254
TTGgwG9719	2020-07-17	202101	G2_8-G2_14_1	6	30.96	7.04	37.27	218	1154	84.1119	TTGgwG9719	0	1	0	0	0	10.2	300	989.8	1000.8	995.3	7.7	4.8	0	0.185	29	58.56	8.5	1	2.35785	13.8668	70.6744	414.908	85.4675	4.28921	22.7072	84.1119
TTGgwG9719	2020-07-17	202102	G2_8-G2_14_1	7	27.83	5.57	35.16	155	979	86.3246	TTGgwG9719	0	1	0	0	0	10.2	300	989.8	1000.8	995.3	7.7	4.8	0	0.185	29	58.56	8.5	1	2.35785	13.8668	70.6744	414.908	85.4675	3.39359	21.4217	86.3246
TTGgwG9719	2020-07-17	202103	G2_8-G2_14_1	8	30.96	6.15	33.13	190	1026	84.3432	TTGgwG9719	0	1	0	0	0	10.2	300	989.8	1000.8	995.3	7.7	4.8	0	0.185	29	58.56	8.5	1	2.35785	13.8668	70.6744	414.908	85.4675	3.74696	20.1849	84.3432
TTGgwG9719	2020-07-17	202104	G2_8-G2_14_1	9	29.82	5.51	35.34	164	1054	86.5116	TTGgwG9719	0	1	0	0	0	10.2	300	989.8	1000.8	995.3	7.7	4.8	0	0.185	29	58.56	8.5	1	2.35785	13.8668	70.6744	414.908	85.4675	3.35704	21.5313	86.5116
TTGgwG9719	2020-07-17	202105	G2_8-G2_14_1	10	30.81	6.21	34.59	191	1066	84.7794	TTGgwG9719	0	1	0	0	0	10.2	300	989.8	1000.8	995.3	7.7	4.8	0	0.185	29	58.56	8.5	1	2.35785	13.8668	70.6744	414.908	85.4675	3.78352	21.0744	84.7794
TTGgwG9719	2020-07-17	202106	G2_8-G2_14_1	11	29.53	5.57	34.4	165	1016	86.0645	TTGgwG9719	0	1	0	0	0	10.2	300	989.8	1000.8	995.3	7.7	4.8	0	0.185	29	58.56	8.5	1	2.35785	13.8668	70.6744	414.908	85.4675	3.39359	20.9586	86.0645
TTGgwG9719	2020-07-17	202107	G2_8-G2_14_1	12	30.87	4.84	36.16	149	1116	88.1951	TTGgwG9719	0	1	0	0	0	10.2	300	989.8	1000.8	995.3	7.7	4.8	0	0.185	29	58.56	8.5	1	2.35785	13.8668	70.6744	414.908	85.4675	2.94883	22.0309	88.1951
DQ6Qwi6FYU	2020-07-12	202008	GⅠ6-8	1	30.57	1.89	30.52	58	933	94.1685	DQ6Qwi6FYU	0	1	0	0	0	9.75	220	1009	1012.8	1010.9	3.8	1.2	30.2	0.363	0	68.88	14	1	0.0311707	0.87174	0.935121	26.0795	96.5478	0.196375	3.1711	94.1685
DQ6Qwi6FYU	2020-07-12	202009	GⅠ6-8	2	29.89	1.85	27.48	55	821	93.6925	DQ6Qwi6FYU	0	1	0	0	0	9.75	220	1009	1012.8	1010.9	3.8	1.2	30.2	0.363	0	68.88	14	1	0.0311707	0.87174	0.935121	26.0795	96.5478	0.192219	2.85524	93.6925
DQ6Qwi6FYU	2020-07-12	202010	GⅠ6-8	3	30.71	1.51	27.09	46	832	94.7203	DQ6Qwi6FYU	0	1	0	0	0	9.75	220	1009	1012.8	1010.9	3.8	1.2	30.2	0.363	0	68.88	14	1	0.0311707	0.87174	0.935121	26.0795	96.5478	0.156892	2.81471	94.7203
DQ6Qwi6FYU	2020-07-12	202011	GⅠ6-8	4	29.98	1.18	25.85	35	775	95.6345	DQ6Qwi6FYU	0	1	0	0	0	9.75	220	1009	1012.8	1010.9	3.8	1.2	30.2	0.363	0	68.88	14	1	0.0311707	0.87174	0.935121	26.0795	96.5478	0.122605	2.68587	95.6345
DQ6Qwi6FYU	2020-07-12	202012	GⅠ6-8	5	31	0.84	27.92	26	866	97.0793	DQ6Qwi6FYU	0	1	0	0	0	9.75	220	1009	1012.8	1010.9	3.8	1.2	30.2	0.363	0	68.88	14	1	0.0311707	0.87174	0.935121	26.0795	96.5478	0.0872779	2.90095	97.0793
DQ6Qwi6FYU	2020-07-12	202101	GⅠ6-8	6	31	0.72	28.39	22	880	97.5266	DQ6Qwi6FYU	0	1	0	0	0	9.75	220	1009	1012.8	1010.9	3.8	1.2	30.2	0.363	0	68.88	14	1	0.0311707	0.87174	0.935121	26.0795	96.5478	0.0748097	2.94979	97.5266
DQ6Qwi6FYU	2020-07-12	202102	GⅠ6-8	7	27.95	0.86	28.44	24	795	97.0648	DQ6Qwi6FYU	0	1	0	0	0	9.75	220	1009	1012.8	1010.9	3.8	1.2	30.2	0.363	0	68.88	14	1	0.0311707	0.87174	0.935121	26.0795	96.5478	0.089356	2.95498	97.0648
DQ6Qwi6FYU	2020-07-12	202103	GⅠ6-8	8	30.98	0.57	28.32	18	877	98.027	DQ6Qwi6FYU	0	1	0	0	0	9.75	220	1009	1012.8	1010.9	3.8	1.2	30.2	0.363	0	68.88	14	1	0.0311707	0.87174	0.935121	26.0795	96.5478	0.0592243	2.94251	98.027
DQ6Qwi6FYU	2020-07-12	202104	GⅠ6-8	9	28.92	0.36	27.26	10	788	98.6966	DQ6Qwi6FYU	0	1	0	0	0	9.75	220	1009	1012.8	1010.9	3.8	1.2	30.2	0.363	0	68.88	14	1	0.0311707	0.87174	0.935121	26.0795	96.5478	0.0374048	2.83238	98.6966
DQ6Qwi6FYU	2020-07-12	202105	GⅠ6-8	10	30.66	0.59	29.25	18	897	98.0228	DQ6Qwi6FYU	0	1	0	0	0	9.75	220	1009	1012.8	1010.9	3.8	1.2	30.2	0.363	0	68.88	14	1	0.0311707	0.87174	0.935121	26.0795	96.5478	0.0613024	3.03914	98.0228
DQ6Qwi6FYU	2020-07-12	202106	GⅠ6-8	11	30	0.57	35.45	17	1064	98.4175	DQ6Qwi6FYU	0	1	0	0	0	9.75	220	1009	1012.8	1010.9	3.8	1.2	30.2	0.363	0	68.88	14	1	0.0311707	0.87174	0.935121	26.0795	96.5478	0.0592243	3.68334	98.4175
DQ6Qwi6FYU	2020-07-12	202107	GⅠ6-8	12	30.92	0.6	37.9	18	1172	98.4416	DQ6Qwi6FYU	0	1	0	0	0	9.75	220	1009	1012.8	1010.9	3.8	1.2	30.2	0.363	0	68.88	14	1	0.0311707	0.87174	0.935121	26.0795	96.5478	0.0623414	3.9379	98.4416
DQ6Qwi6FYU	2020-07-12	202008	GⅠ10-GⅠ13	1	30.57	1.89	30.52	58	933	94.1685	DQ6Qwi6FYU	0	1	0	0	0	9.75	220	1020.9	1030.7	1025.8	8.3	4.3	31.8	0.678	0	122.92	25	2	0.20862	5.83442	6.25861	174.546	96.5478	1.31431	21.2236	94.1685
DQ6Qwi6FYU	2020-07-12	202009	GⅠ10-GⅠ13	2	29.89	1.85	27.48	55	821	93.6925	DQ6Qwi6FYU	0	1	0	0	0	9.75	220	1020.9	1030.7	1025.8	8.3	4.3	31.8	0.678	0	122.92	25	2	0.20862	5.83442	6.25861	174.546	96.5478	1.28649	19.1096	93.6925
DQ6Qwi6FYU	2020-07-12	202010	GⅠ10-GⅠ13	3	30.71	1.51	27.09	46	832	94.7203	DQ6Qwi6FYU	0	1	0	0	0	9.75	220	1020.9	1030.7	1025.8	8.3	4.3	31.8	0.678	0	122.92	25	2	0.20862	5.83442	6.25861	174.546	96.5478	1.05006	18.8384	94.7203
DQ6Qwi6FYU	2020-07-12	202011	GⅠ10-GⅠ13	4	29.98	1.18	25.85	35	775	95.6345	DQ6Qwi6FYU	0	1	0	0	0	9.75	220	1020.9	1030.7	1025.8	8.3	4.3	31.8	0.678	0	122.92	25	2	0.20862	5.83442	6.25861	174.546	96.5478	0.820573	17.9761	95.6345
DQ6Qwi6FYU	2020-07-12	202012	GⅠ10-GⅠ13	5	31	0.84	27.92	26	866	97.0793	DQ6Qwi6FYU	0	1	0	0	0	9.75	220	1020.9	1030.7	1025.8	8.3	4.3	31.8	0.678	0	122.92	25	2	0.20862	5.83442	6.25861	174.546	96.5478	0.584137	19.4156	97.0793
DQ6Qwi6FYU	2020-07-12	202101	GⅠ10-GⅠ13	6	31	0.72	28.39	22	880	97.5266	DQ6Qwi6FYU	0	1	0	0	0	9.75	220	1020.9	1030.7	1025.8	8.3	4.3	31.8	0.678	0	122.92	25	2	0.20862	5.83442	6.25861	174.546	96.5478	0.500689	19.7424	97.5266
DQ6Qwi6FYU	2020-07-12	202102	GⅠ10-GⅠ13	7	27.95	0.86	28.44	24	795	97.0648	DQ6Qwi6FYU	0	1	0	0	0	9.75	220	1020.9	1030.7	1025.8	8.3	4.3	31.8	0.678	0	122.92	25	2	0.20862	5.83442	6.25861	174.546	96.5478	0.598045	19.7772	97.0648
DQ6Qwi6FYU	2020-07-12	202103	GⅠ10-GⅠ13	8	30.98	0.57	28.32	18	877	98.027	DQ6Qwi6FYU	0	1	0	0	0	9.75	220	1020.9	1030.7	1025.8	8.3	4.3	31.8	0.678	0	122.92	25	2	0.20862	5.83442	6.25861	174.546	96.5478	0.396379	19.6938	98.027
DQ6Qwi6FYU	2020-07-12	202104	GⅠ10-GⅠ13	9	28.92	0.36	27.26	10	788	98.6966	DQ6Qwi6FYU	0	1	0	0	0	9.75	220	1020.9	1030.7	1025.8	8.3	4.3	31.8	0.678	0	122.92	25	2	0.20862	5.83442	6.25861	174.546	96.5478	0.250344	18.9566	98.6966
DQ6Qwi6FYU	2020-07-12	202105	GⅠ10-GⅠ13	10	30.66	0.59	29.25	18	897	98.0228	DQ6Qwi6FYU	0	1	0	0	0	9.75	220	1020.9	1030.7	1025.8	8.3	4.3	31.8	0.678	0	122.92	25	2	0.20862	5.83442	6.25861	174.546	96.5478	0.410287	20.3405	98.0228
DQ6Qwi6FYU	2020-07-12	202106	GⅠ10-GⅠ13	11	30	0.57	35.45	17	1064	98.4175	DQ6Qwi6FYU	0	1	0	0	0	9.75	220	1020.9	1030.7	1025.8	8.3	4.3	31.8	0.678	0	122.92	25	2	0.20862	5.83442	6.25861	174.546	96.5478	0.396379	24.652	98.4175
DQ6Qwi6FYU	2020-07-12	202107	GⅠ10-GⅠ13	12	30.92	0.6	37.9	18	1172	98.4416	DQ6Qwi6FYU	0	1	0	0	0	9.75	220	1020.9	1030.7	1025.8	8.3	4.3	31.8	0.678	0	122.92	25	2	0.20862	5.83442	6.25861	174.546	96.5478	0.417241	26.3557	98.4416
SboZbq9199	2020-07-21	202008	P1_3	1	28.94	3.6	80.49	104	2329	95.7189	SboZbq9199	0	1	0	0	0	6.6	212	1005.1	1008.3	1006.7	3	1.7	30.2	0.22	38	102.98	16	1	0	0	0	0	0	1.20214	26.8779	95.7189
SboZbq9199	2020-07-21	202009	P1_3	2	29.8	2.6	71.05	78	2117	96.4698	SboZbq9199	0	1	0	0	0	6.6	212	1005.1	1008.3	1006.7	3	1.7	30.2	0.22	38	102.98	16	1	0	0	0	0	0	0.868214	23.7256	96.4698
SboZbq9199	2020-07-21	202010	P1_3	3	30.94	1.6	60.87	50	1883	97.4388	SboZbq9199	0	1	0	0	0	6.6	212	1005.1	1008.3	1006.7	3	1.7	30.2	0.22	38	102.98	16	1	0	0	0	0	0	0.534286	20.3262	97.4388
SboZbq9199	2020-07-21	202011	P1_3	4	29.81	1.52	51.41	45	1532	97.1283	SboZbq9199	0	1	0	0	0	6.6	212	1005.1	1008.3	1006.7	3	1.7	30.2	0.22	38	102.98	16	1	0	0	0	0	0	0.507571	17.1673	97.1283
SboZbq9199	2020-07-21	202012	P1_3	5	30.98	1.33	45.67	41	1415	97.1702	SboZbq9199	0	1	0	0	0	6.6	212	1005.1	1008.3	1006.7	3	1.7	30.2	0.22	38	102.98	16	1	0	0	0	0	0	0.444125	15.2505	97.1702
SboZbq9199	2020-07-21	202101	P1_3	6	31	0.94	43.36	29	1344	97.8781	SboZbq9199	0	1	0	0	0	6.6	212	1005.1	1008.3	1006.7	3	1.7	30.2	0.22	38	102.98	16	1	0	0	0	0	0	0.313893	14.4791	97.8781
SboZbq9199	2020-07-21	202102	P1_3	7	8.25	0.43	42.14	4	348	98.9899	SboZbq9199	0	1	0	0	0	6.6	212	1005.1	1008.3	1006.7	3	1.7	30.2	0.22	38	102.98	16	1	0	0	0	0	0	0.143589	14.0717	98.9899
SboZbq9199	2020-07-21	202103	P1_3	8	1.04	0.32	32.1	0	40	99.013	SboZbq9199	0	1	0	0	0	6.6	212	1005.1	1008.3	1006.7	3	1.7	30.2	0.22	38	102.98	16	1	0	0	0	0	0	0.106857	10.7191	99.013
SboZbq9199	2020-07-21	202104	P1_3	9	21	0.19	24.27	4	510	99.2232	SboZbq9199	0	1	0	0	0	6.6	212	1005.1	1008.3	1006.7	3	1.7	30.2	0.22	38	102.98	16	1	0	0	0	0	0	0.0634464	8.10445	99.2232
SboZbq9199	2020-07-21	202105	P1_3	10	30.83	0.11	15.56	3	480	99.298	SboZbq9199	0	1	0	0	0	6.6	212	1005.1	1008.3	1006.7	3	1.7	30.2	0.22	38	102.98	16	1	0	0	0	0	0	0.0367321	5.19593	99.298
SboZbq9199	2020-07-21	202107	P1_3	11	20.72	0.13	16.16	3	335	99.202	SboZbq9199	0	1	0	0	0	6.6	212	1005.1	1008.3	1006.7	3	1.7	30.2	0.22	38	102.98	16	1	0	0	0	0	0	0.0434107	5.39629	99.202
SboZbq9199	2020-07-21	202008	P2_3	1	28.94	3.6	80.49	104	2329	95.7189	SboZbq9199	0	1	0	0	0	6.6	212	1031.8	1033.8	1032.8	2.8	0.8	30.2	0.25	48	97.6	15	1	0	0	0	0	0	0.642857	14.3732	95.7189
SboZbq9199	2020-07-21	202009	P2_3	2	29.8	2.6	71.05	78	2117	96.4698	SboZbq9199	0	1	0	0	0	6.6	212	1031.8	1033.8	1032.8	2.8	0.8	30.2	0.25	48	97.6	15	1	0	0	0	0	0	0.464286	12.6875	96.4698
SboZbq9199	2020-07-21	202010	P2_3	3	30.94	1.6	60.87	50	1883	97.4388	SboZbq9199	0	1	0	0	0	6.6	212	1031.8	1033.8	1032.8	2.8	0.8	30.2	0.25	48	97.6	15	1	0	0	0	0	0	0.285714	10.8696	97.4388
SboZbq9199	2020-07-21	202011	P2_3	4	29.81	1.52	51.41	45	1532	97.1283	SboZbq9199	0	1	0	0	0	6.6	212	1031.8	1033.8	1032.8	2.8	0.8	30.2	0.25	48	97.6	15	1	0	0	0	0	0	0.271429	9.18036	97.1283
SboZbq9199	2020-07-21	202012	P2_3	5	30.98	1.33	45.67	41	1415	97.1702	SboZbq9199	0	1	0	0	0	6.6	212	1031.8	1033.8	1032.8	2.8	0.8	30.2	0.25	48	97.6	15	1	0	0	0	0	0	0.2375	8.15536	97.1702
SboZbq9199	2020-07-21	202101	P2_3	6	31	0.94	43.36	29	1344	97.8781	SboZbq9199	0	1	0	0	0	6.6	212	1031.8	1033.8	1032.8	2.8	0.8	30.2	0.25	48	97.6	15	1	0	0	0	0	0	0.167857	7.74286	97.8781
SboZbq9199	2020-07-21	202102	P2_3	7	8.25	0.43	42.14	4	348	98.9899	SboZbq9199	0	1	0	0	0	6.6	212	1031.8	1033.8	1032.8	2.8	0.8	30.2	0.25	48	97.6	15	1	0	0	0	0	0	0.0767857	7.525	98.9899
SboZbq9199	2020-07-21	202103	P2_3	8	1.04	0.32	32.1	0	40	99.013	SboZbq9199	0	1	0	0	0	6.6	212	1031.8	1033.8	1032.8	2.8	0.8	30.2	0.25	48	97.6	15	1	0	0	0	0	0	0.0571429	5.73214	99.013
SboZbq9199	2020-07-21	202104	P2_3	9	21	0.19	24.27	4	510	99.2232	SboZbq9199	0	1	0	0	0	6.6	212	1031.8	1033.8	1032.8	2.8	0.8	30.2	0.25	48	97.6	15	1	0	0	0	0	0	0.0339286	4.33393	99.2232
SboZbq9199	2020-07-21	202105	P2_3	10	30.83	0.11	15.56	3	480	99.298	SboZbq9199	0	1	0	0	0	6.6	212	1031.8	1033.8	1032.8	2.8	0.8	30.2	0.25	48	97.6	15	1	0	0	0	0	0	0.0196429	2.77857	99.298
SboZbq9199	2020-07-21	202107	P2_3	11	20.72	0.13	16.16	3	335	99.202	SboZbq9199	0	1	0	0	0	6.6	212	1031.8	1033.8	1032.8	2.8	0.8	30.2	0.25	48	97.6	15	1	0	0	0	0	0	0.0232143	2.88571	99.202
SboZbq9199	2020-07-21	202008	P2_6-7-P2_9	1	28.94	3.6	80.49	104	2329	95.7189	SboZbq9199	0	1	0	0	0	6.6	212	1041.8	1049.4	1045.6	5.5	2.1	30.2	0.26	35	182.98	29	2	0	0	0	0	0	1.755	39.2389	95.7189
SboZbq9199	2020-07-21	202009	P2_6-7-P2_9	2	29.8	2.6	71.05	78	2117	96.4698	SboZbq9199	0	1	0	0	0	6.6	212	1041.8	1049.4	1045.6	5.5	2.1	30.2	0.26	35	182.98	29	2	0	0	0	0	0	1.2675	34.6369	96.4698
SboZbq9199	2020-07-21	202010	P2_6-7-P2_9	3	30.94	1.6	60.87	50	1883	97.4388	SboZbq9199	0	1	0	0	0	6.6	212	1041.8	1049.4	1045.6	5.5	2.1	30.2	0.26	35	182.98	29	2	0	0	0	0	0	0.78	29.6741	97.4388
SboZbq9199	2020-07-21	202011	P2_6-7-P2_9	4	29.81	1.52	51.41	45	1532	97.1283	SboZbq9199	0	1	0	0	0	6.6	212	1041.8	1049.4	1045.6	5.5	2.1	30.2	0.26	35	182.98	29	2	0	0	0	0	0	0.741	25.0624	97.1283
SboZbq9199	2020-07-21	202012	P2_6-7-P2_9	5	30.98	1.33	45.67	41	1415	97.1702	SboZbq9199	0	1	0	0	0	6.6	212	1041.8	1049.4	1045.6	5.5	2.1	30.2	0.26	35	182.98	29	2	0	0	0	0	0	0.648375	22.2641	97.1702
SboZbq9199	2020-07-21	202101	P2_6-7-P2_9	6	31	0.94	43.36	29	1344	97.8781	SboZbq9199	0	1	0	0	0	6.6	212	1041.8	1049.4	1045.6	5.5	2.1	30.2	0.26	35	182.98	29	2	0	0	0	0	0	0.45825	21.138	97.8781
SboZbq9199	2020-07-21	202102	P2_6-7-P2_9	7	8.25	0.43	42.14	4	348	98.9899	SboZbq9199	0	1	0	0	0	6.6	212	1041.8	1049.4	1045.6	5.5	2.1	30.2	0.26	35	182.98	29	2	0	0	0	0	0	0.209625	20.5433	98.9899
SboZbq9199	2020-07-21	202103	P2_6-7-P2_9	8	1.04	0.32	32.1	0	40	99.013	SboZbq9199	0	1	0	0	0	6.6	212	1041.8	1049.4	1045.6	5.5	2.1	30.2	0.26	35	182.98	29	2	0	0	0	0	0	0.156	15.6487	99.013
SboZbq9199	2020-07-21	202104	P2_6-7-P2_9	9	21	0.19	24.27	4	510	99.2232	SboZbq9199	0	1	0	0	0	6.6	212	1041.8	1049.4	1045.6	5.5	2.1	30.2	0.26	35	182.98	29	2	0	0	0	0	0	0.092625	11.8316	99.2232
SboZbq9199	2020-07-21	202105	P2_6-7-P2_9	10	30.83	0.11	15.56	3	480	99.298	SboZbq9199	0	1	0	0	0	6.6	212	1041.8	1049.4	1045.6	5.5	2.1	30.2	0.26	35	182.98	29	2	0	0	0	0	0	0.053625	7.5855	99.298
SboZbq9199	2020-07-21	202107	P2_6-7-P2_9	11	20.72	0.13	16.16	3	335	99.202	SboZbq9199	0	1	0	0	0	6.6	212	1041.8	1049.4	1045.6	5.5	2.1	30.2	0.26	35	182.98	29	2	0	0	0	0	0	0.063375	7.878	99.202
UJnyWx3262	2020-07-29	202010	S2_14-S2_15+16	1	10.98	2.96	128.69	33	1413	97.7516	UJnyWx3262	0	1	0	0	0	9.35	125	860.7	865.3	863	2.7	1.2	29.4	0.11	31	103.2	16	1	0	0	0	0	0	0.162394	7.0603	97.7516
UJnyWx3262	2020-07-29	202012	S2_14-S2_15+16	2	30.9	3.16	129.47	98	4000	97.6174	UJnyWx3262	0	1	0	0	0	9.35	125	860.7	865.3	863	2.7	1.2	29.4	0.11	31	103.2	16	1	0	0	0	0	0	0.173367	7.10309	97.6174
UJnyWx3262	2020-07-29	202101	S2_14-S2_15+16	3	31	3.97	130.52	123	4046	97.0481	UJnyWx3262	0	1	0	0	0	9.35	125	860.7	865.3	863	2.7	1.2	29.4	0.11	31	103.2	16	1	0	0	0	0	0	0.217805	7.1607	97.0481
UJnyWx3262	2020-07-29	202102	S2_14-S2_15+16	4	27.98	3.6	128.82	101	3604	97.2814	UJnyWx3262	0	1	0	0	0	9.35	125	860.7	865.3	863	2.7	1.2	29.4	0.11	31	103.2	16	1	0	0	0	0	0	0.197506	7.06743	97.2814
UJnyWx3262	2020-07-29	202103	S2_14-S2_15+16	5	30.92	2.75	129.09	85	3991	97.9141	UJnyWx3262	0	1	0	0	0	9.35	125	860.7	865.3	863	2.7	1.2	29.4	0.11	31	103.2	16	1	0	0	0	0	0	0.150873	7.08224	97.9141
UJnyWx3262	2020-07-29	202104	S2_14-S2_15+16	6	29.96	2.99	126.38	90	3786	97.6888	UJnyWx3262	0	1	0	0	0	9.35	125	860.7	865.3	863	2.7	1.2	29.4	0.11	31	103.2	16	1	0	0	0	0	0	0.16404	6.93357	97.6888
UJnyWx3262	2020-07-29	202105	S2_14-S2_15+16	7	31	2.13	128.85	66	3994	98.3738	UJnyWx3262	0	1	0	0	0	9.35	125	860.7	865.3	863	2.7	1.2	29.4	0.11	31	103.2	16	1	0	0	0	0	0	0.116858	7.06908	98.3738
UJnyWx3262	2020-07-29	202106	S2_14-S2_15+16	8	29.98	3.54	122.3	106	3666	97.1869	UJnyWx3262	0	1	0	0	0	9.35	125	860.7	865.3	863	2.7	1.2	29.4	0.11	31	103.2	16	1	0	0	0	0	0	0.194214	6.70973	97.1869
UJnyWx3262	2020-07-29	202107	S2_14-S2_15+16	9	31	3.08	123.56	95	3830	97.5679	UJnyWx3262	0	1	0	0	0	9.35	125	860.7	865.3	863	2.7	1.2	29.4	0.11	31	103.2	16	1	0	0	0	0	0	0.168978	6.77885	97.5679
UJnyWx3262	2020-07-29	202010	S3_1-S3_3_2	1	10.98	2.96	128.69	33	1413	97.7516	UJnyWx3262	0	1	0	0	0	9.35	125	868	875.8	871.9	3.3	1.2	30	0.27	41	102.9	16	1	0	0	0	0	0	0.398603	17.3298	97.7516
UJnyWx3262	2020-07-29	202012	S3_1-S3_3_2	2	30.9	3.16	129.47	98	4000	97.6174	UJnyWx3262	0	1	0	0	0	9.35	125	868	875.8	871.9	3.3	1.2	30	0.27	41	102.9	16	1	0	0	0	0	0	0.425536	17.4349	97.6174
UJnyWx3262	2020-07-29	202101	S3_1-S3_3_2	3	31	3.97	130.52	123	4046	97.0481	UJnyWx3262	0	1	0	0	0	9.35	125	868	875.8	871.9	3.3	1.2	30	0.27	41	102.9	16	1	0	0	0	0	0	0.534613	17.5763	97.0481
UJnyWx3262	2020-07-29	202102	S3_1-S3_3_2	4	27.98	3.6	128.82	101	3604	97.2814	UJnyWx3262	0	1	0	0	0	9.35	125	868	875.8	871.9	3.3	1.2	30	0.27	41	102.9	16	1	0	0	0	0	0	0.484788	17.3473	97.2814
UJnyWx3262	2020-07-29	202103	S3_1-S3_3_2	5	30.92	2.75	129.09	85	3991	97.9141	UJnyWx3262	0	1	0	0	0	9.35	125	868	875.8	871.9	3.3	1.2	30	0.27	41	102.9	16	1	0	0	0	0	0	0.370324	17.3837	97.9141
UJnyWx3262	2020-07-29	202104	S3_1-S3_3_2	6	29.96	2.99	126.38	90	3786	97.6888	UJnyWx3262	0	1	0	0	0	9.35	125	868	875.8	871.9	3.3	1.2	30	0.27	41	102.9	16	1	0	0	0	0	0	0.402643	17.0188	97.6888
UJnyWx3262	2020-07-29	202105	S3_1-S3_3_2	7	31	2.13	128.85	66	3994	98.3738	UJnyWx3262	0	1	0	0	0	9.35	125	868	875.8	871.9	3.3	1.2	30	0.27	41	102.9	16	1	0	0	0	0	0	0.286833	17.3514	98.3738
UJnyWx3262	2020-07-29	202106	S3_1-S3_3_2	8	29.98	3.54	122.3	106	3666	97.1869	UJnyWx3262	0	1	0	0	0	9.35	125	868	875.8	871.9	3.3	1.2	30	0.27	41	102.9	16	1	0	0	0	0	0	0.476708	16.4693	97.1869
UJnyWx3262	2020-07-29	202107	S3_1-S3_3_2	9	31	3.08	123.56	95	3830	97.5679	UJnyWx3262	0	1	0	0	0	9.35	125	868	875.8	871.9	3.3	1.2	30	0.27	41	102.9	16	1	0	0	0	0	0	0.414763	16.639	97.5679
UJnyWx3262	2020-07-29	202010	S3_3_3-S3_3-4	1	10.98	2.96	128.69	33	1413	97.7516	UJnyWx3262	0	1	0	0	0	9.35	125	877.7	880	878.85	2.7	1.9	30	0.27	27	96.95	15	1	0	0	0	0	0	0.631122	27.4389	97.7516
UJnyWx3262	2020-07-29	202012	S3_3_3-S3_3-4	2	30.9	3.16	129.47	98	4000	97.6174	UJnyWx3262	0	1	0	0	0	9.35	125	877.7	880	878.85	2.7	1.9	30	0.27	27	96.95	15	1	0	0	0	0	0	0.673766	27.6052	97.6174
UJnyWx3262	2020-07-29	202101	S3_3_3-S3_3-4	3	31	3.97	130.52	123	4046	97.0481	UJnyWx3262	0	1	0	0	0	9.35	125	877.7	880	878.85	2.7	1.9	30	0.27	27	96.95	15	1	0	0	0	0	0	0.846471	27.8291	97.0481
UJnyWx3262	2020-07-29	202102	S3_3_3-S3_3-4	4	27.98	3.6	128.82	101	3604	97.2814	UJnyWx3262	0	1	0	0	0	9.35	125	877.7	880	878.85	2.7	1.9	30	0.27	27	96.95	15	1	0	0	0	0	0	0.767581	27.4666	97.2814
UJnyWx3262	2020-07-29	202103	S3_3_3-S3_3-4	5	30.92	2.75	129.09	85	3991	97.9141	UJnyWx3262	0	1	0	0	0	9.35	125	877.7	880	878.85	2.7	1.9	30	0.27	27	96.95	15	1	0	0	0	0	0	0.586347	27.5242	97.9141
UJnyWx3262	2020-07-29	202104	S3_3_3-S3_3-4	6	29.96	2.99	126.38	90	3786	97.6888	UJnyWx3262	0	1	0	0	0	9.35	125	877.7	880	878.85	2.7	1.9	30	0.27	27	96.95	15	1	0	0	0	0	0	0.637519	26.9464	97.6888
UJnyWx3262	2020-07-29	202105	S3_3_3-S3_3-4	7	31	2.13	128.85	66	3994	98.3738	UJnyWx3262	0	1	0	0	0	9.35	125	877.7	880	878.85	2.7	1.9	30	0.27	27	96.95	15	1	0	0	0	0	0	0.454152	27.473	98.3738
UJnyWx3262	2020-07-29	202106	S3_3_3-S3_3-4	8	29.98	3.54	122.3	106	3666	97.1869	UJnyWx3262	0	1	0	0	0	9.35	125	877.7	880	878.85	2.7	1.9	30	0.27	27	96.95	15	1	0	0	0	0	0	0.754788	26.0764	97.1869
UJnyWx3262	2020-07-29	202107	S3_3_3-S3_3-4	9	31	3.08	123.56	95	3830	97.5679	UJnyWx3262	0	1	0	0	0	9.35	125	877.7	880	878.85	2.7	1.9	30	0.27	27	96.95	15	1	0	0	0	0	0	0.656708	26.3451	97.5679
UJnyWx3262	2020-07-29	202010	G1_2+3_1-G1_2+3_3	1	10.98	2.96	128.69	33	1413	97.7516	UJnyWx3262	0	1	0	0	0	9.35	125	980	984.4	982.2	3.8	2.3	29.4	0.36	36	103.74	16	1	0	0	0	0	0	1.01865	44.2873	97.7516
UJnyWx3262	2020-07-29	202012	G1_2+3_1-G1_2+3_3	2	30.9	3.16	129.47	98	4000	97.6174	UJnyWx3262	0	1	0	0	0	9.35	125	980	984.4	982.2	3.8	2.3	29.4	0.36	36	103.74	16	1	0	0	0	0	0	1.08748	44.5558	97.6174
UJnyWx3262	2020-07-29	202101	G1_2+3_1-G1_2+3_3	3	31	3.97	130.52	123	4046	97.0481	UJnyWx3262	0	1	0	0	0	9.35	125	980	984.4	982.2	3.8	2.3	29.4	0.36	36	103.74	16	1	0	0	0	0	0	1.36623	44.9171	97.0481
UJnyWx3262	2020-07-29	202102	G1_2+3_1-G1_2+3_3	4	27.98	3.6	128.82	101	3604	97.2814	UJnyWx3262	0	1	0	0	0	9.35	125	980	984.4	982.2	3.8	2.3	29.4	0.36	36	103.74	16	1	0	0	0	0	0	1.2389	44.3321	97.2814
UJnyWx3262	2020-07-29	202103	G1_2+3_1-G1_2+3_3	5	30.92	2.75	129.09	85	3991	97.9141	UJnyWx3262	0	1	0	0	0	9.35	125	980	984.4	982.2	3.8	2.3	29.4	0.36	36	103.74	16	1	0	0	0	0	0	0.946384	44.425	97.9141
UJnyWx3262	2020-07-29	202104	G1_2+3_1-G1_2+3_3	6	29.96	2.99	126.38	90	3786	97.6888	UJnyWx3262	0	1	0	0	0	9.35	125	980	984.4	982.2	3.8	2.3	29.4	0.36	36	103.74	16	1	0	0	0	0	0	1.02898	43.4924	97.6888
UJnyWx3262	2020-07-29	202105	G1_2+3_1-G1_2+3_3	7	31	2.13	128.85	66	3994	98.3738	UJnyWx3262	0	1	0	0	0	9.35	125	980	984.4	982.2	3.8	2.3	29.4	0.36	36	103.74	16	1	0	0	0	0	0	0.733017	44.3424	98.3738
UJnyWx3262	2020-07-29	202106	G1_2+3_1-G1_2+3_3	8	29.98	3.54	122.3	106	3666	97.1869	UJnyWx3262	0	1	0	0	0	9.35	125	980	984.4	982.2	3.8	2.3	29.4	0.36	36	103.74	16	1	0	0	0	0	0	1.21825	42.0883	97.1869
UJnyWx3262	2020-07-29	202107	G1_2+3_1-G1_2+3_3	9	31	3.08	123.56	95	3830	97.5679	UJnyWx3262	0	1	0	0	0	9.35	125	980	984.4	982.2	3.8	2.3	29.4	0.36	36	103.74	16	1	0	0	0	0	0	1.05995	42.5219	97.5679
UJnyWx3262	2020-07-29	202010	G1_4+5-G1_9	1	10.98	2.96	128.69	33	1413	97.7516	UJnyWx3262	0	1	0	0	0	9.35	125	987.4	1000.1	993.75	4.6	2.1	28.7	0.29	38	110.04	17	1	0	0	0	0	0	0.749227	32.5737	97.7516
UJnyWx3262	2020-07-29	202012	G1_4+5-G1_9	2	30.9	3.16	129.47	98	4000	97.6174	UJnyWx3262	0	1	0	0	0	9.35	125	987.4	1000.1	993.75	4.6	2.1	28.7	0.29	38	110.04	17	1	0	0	0	0	0	0.79985	32.7711	97.6174
UJnyWx3262	2020-07-29	202101	G1_4+5-G1_9	3	31	3.97	130.52	123	4046	97.0481	UJnyWx3262	0	1	0	0	0	9.35	125	987.4	1000.1	993.75	4.6	2.1	28.7	0.29	38	110.04	17	1	0	0	0	0	0	1.00488	33.0369	97.0481
UJnyWx3262	2020-07-29	202102	G1_4+5-G1_9	4	27.98	3.6	128.82	101	3604	97.2814	UJnyWx3262	0	1	0	0	0	9.35	125	987.4	1000.1	993.75	4.6	2.1	28.7	0.29	38	110.04	17	1	0	0	0	0	0	0.911222	32.6066	97.2814
UJnyWx3262	2020-07-29	202103	G1_4+5-G1_9	5	30.92	2.75	129.09	85	3991	97.9141	UJnyWx3262	0	1	0	0	0	9.35	125	987.4	1000.1	993.75	4.6	2.1	28.7	0.29	38	110.04	17	1	0	0	0	0	0	0.696072	32.6749	97.9141
UJnyWx3262	2020-07-29	202104	G1_4+5-G1_9	6	29.96	2.99	126.38	90	3786	97.6888	UJnyWx3262	0	1	0	0	0	9.35	125	987.4	1000.1	993.75	4.6	2.1	28.7	0.29	38	110.04	17	1	0	0	0	0	0	0.75682	31.989	97.6888
UJnyWx3262	2020-07-29	202105	G1_4+5-G1_9	7	31	2.13	128.85	66	3994	98.3738	UJnyWx3262	0	1	0	0	0	9.35	125	987.4	1000.1	993.75	4.6	2.1	28.7	0.29	38	110.04	17	1	0	0	0	0	0	0.53914	32.6142	98.3738
UJnyWx3262	2020-07-29	202106	G1_4+5-G1_9	8	29.98	3.54	122.3	106	3666	97.1869	UJnyWx3262	0	1	0	0	0	9.35	125	987.4	1000.1	993.75	4.6	2.1	28.7	0.29	38	110.04	17	1	0	0	0	0	0	0.896035	30.9562	97.1869
UJnyWx3262	2020-07-29	202107	G1_4+5-G1_9	9	31	3.08	123.56	95	3830	97.5679	UJnyWx3262	0	1	0	0	0	9.35	125	987.4	1000.1	993.75	4.6	2.1	28.7	0.29	38	110.04	17	1	0	0	0	0	0	0.779601	31.2752	97.5679
DQQwJqyIpK	2020-08-01	202009	GⅢ1-GⅢ3	1	28.9	2.98	99.09	86	2864	97.0804	DQQwJqyIpK	0	1	0	0	0	10.11	106	1129.3	1137	1133.15	6.1	1.7	27.3	0.203	27	105	17	2	0.125812	4.94198	3.53156	137.731	97.5174	0.657754	21.8714	97.0804
DQQwJqyIpK	2020-08-01	202010	GⅢ1-GⅢ3	2	30.51	3.41	103.27	104	3150	96.8035	DQQwJqyIpK	0	1	0	0	0	10.11	106	1129.3	1137	1133.15	6.1	1.7	27.3	0.203	27	105	17	2	0.125812	4.94198	3.53156	137.731	97.5174	0.752665	22.794	96.8035
DQQwJqyIpK	2020-08-01	202011	GⅢ1-GⅢ3	3	29.82	2.33	100.27	69	2990	97.729	DQQwJqyIpK	0	1	0	0	0	10.11	106	1129.3	1137	1133.15	6.1	1.7	27.3	0.203	27	105	17	2	0.125812	4.94198	3.53156	137.731	97.5174	0.514284	22.1319	97.729
DQQwJqyIpK	2020-08-01	202012	GⅢ1-GⅢ3	4	30.88	0.6	98.91	19	3055	99.397	DQQwJqyIpK	0	1	0	0	0	10.11	106	1129.3	1137	1133.15	6.1	1.7	27.3	0.203	27	105	17	2	0.125812	4.94198	3.53156	137.731	97.5174	0.132434	21.8317	99.397
DQQwJqyIpK	2020-08-01	202101	GⅢ1-GⅢ3	5	30.74	0.74	78.84	23	2423	99.0701	DQQwJqyIpK	0	1	0	0	0	10.11	106	1129.3	1137	1133.15	6.1	1.7	27.3	0.203	27	105	17	2	0.125812	4.94198	3.53156	137.731	97.5174	0.163335	17.4018	99.0701
DQQwJqyIpK	2020-08-01	202102	GⅢ1-GⅢ3	6	27.88	0.83	70.39	23	1963	98.8346	DQQwJqyIpK	0	1	0	0	0	10.11	106	1129.3	1137	1133.15	6.1	1.7	27.3	0.203	27	105	17	2	0.125812	4.94198	3.53156	137.731	97.5174	0.1832	15.5367	98.8346
DQQwJqyIpK	2020-08-01	202103	GⅢ1-GⅢ3	7	30.85	0.67	67.32	21	2077	99.0146	DQQwJqyIpK	0	1	0	0	0	10.11	106	1129.3	1137	1133.15	6.1	1.7	27.3	0.203	27	105	17	2	0.125812	4.94198	3.53156	137.731	97.5174	0.147884	14.8591	99.0146
DQQwJqyIpK	2020-08-01	202009	GⅢ4-GⅢ9	1	28.9	2.98	99.09	86	2864	97.0804	DQQwJqyIpK	0	1	0	0	0	10.11	106	1139	1154.3	1146.65	11.3	4.6	27.6	0.241	30	105	17	2	0.404159	15.8756	11.3448	442.447	97.5174	2.11297	70.2598	97.0804
DQQwJqyIpK	2020-08-01	202010	GⅢ4-GⅢ9	2	30.51	3.41	103.27	104	3150	96.8035	DQQwJqyIpK	0	1	0	0	0	10.11	106	1139	1154.3	1146.65	11.3	4.6	27.6	0.241	30	105	17	2	0.404159	15.8756	11.3448	442.447	97.5174	2.41786	73.2236	96.8035
DQQwJqyIpK	2020-08-01	202011	GⅢ4-GⅢ9	3	29.82	2.33	100.27	69	2990	97.729	DQQwJqyIpK	0	1	0	0	0	10.11	106	1139	1154.3	1146.65	11.3	4.6	27.6	0.241	30	105	17	2	0.404159	15.8756	11.3448	442.447	97.5174	1.65209	71.0965	97.729
DQQwJqyIpK	2020-08-01	202012	GⅢ4-GⅢ9	4	30.88	0.6	98.91	19	3055	99.397	DQQwJqyIpK	0	1	0	0	0	10.11	106	1139	1154.3	1146.65	11.3	4.6	27.6	0.241	30	105	17	2	0.404159	15.8756	11.3448	442.447	97.5174	0.42543	70.1322	99.397
DQQwJqyIpK	2020-08-01	202101	GⅢ4-GⅢ9	5	30.74	0.74	78.84	23	2423	99.0701	DQQwJqyIpK	0	1	0	0	0	10.11	106	1139	1154.3	1146.65	11.3	4.6	27.6	0.241	30	105	17	2	0.404159	15.8756	11.3448	442.447	97.5174	0.524697	55.9015	99.0701
DQQwJqyIpK	2020-08-01	202102	GⅢ4-GⅢ9	6	27.88	0.83	70.39	23	1963	98.8346	DQQwJqyIpK	0	1	0	0	0	10.11	106	1139	1154.3	1146.65	11.3	4.6	27.6	0.241	30	105	17	2	0.404159	15.8756	11.3448	442.447	97.5174	0.588512	49.91	98.8346
DQQwJqyIpK	2020-08-01	202103	GⅢ4-GⅢ9	7	30.85	0.67	67.32	21	2077	99.0146	DQQwJqyIpK	0	1	0	0	0	10.11	106	1139	1154.3	1146.65	11.3	4.6	27.6	0.241	30	105	17	2	0.404159	15.8756	11.3448	442.447	97.5174	0.475064	47.7333	99.0146
DQQwJqyIpK	2020-08-01	202009	GⅢ16-GⅢ19	1	28.9	2.98	99.09	86	2864	97.0804	DQQwJqyIpK	0	1	0	0	0	10.11	106	1173.8	1184.6	1179.2	6.4	0.2	25.9	0.063	34	105	17	2	0.00459354	0.180437	0.128941	5.02872	97.5174	0.0240154	0.798551	97.0804
DQQwJqyIpK	2020-08-01	202010	GⅢ16-GⅢ19	2	30.51	3.41	103.27	104	3150	96.8035	DQQwJqyIpK	0	1	0	0	0	10.11	106	1173.8	1184.6	1179.2	6.4	0.2	25.9	0.063	34	105	17	2	0.00459354	0.180437	0.128941	5.02872	97.5174	0.0274807	0.832237	96.8035
DQQwJqyIpK	2020-08-01	202011	GⅢ16-GⅢ19	3	29.82	2.33	100.27	69	2990	97.729	DQQwJqyIpK	0	1	0	0	0	10.11	106	1173.8	1184.6	1179.2	6.4	0.2	25.9	0.063	34	105	17	2	0.00459354	0.180437	0.128941	5.02872	97.5174	0.0187771	0.80806	97.729
DQQwJqyIpK	2020-08-01	202012	GⅢ16-GⅢ19	4	30.88	0.6	98.91	19	3055	99.397	DQQwJqyIpK	0	1	0	0	0	10.11	106	1173.8	1184.6	1179.2	6.4	0.2	25.9	0.063	34	105	17	2	0.00459354	0.180437	0.128941	5.02872	97.5174	0.00483531	0.7971	99.397
DQQwJqyIpK	2020-08-01	202101	GⅢ16-GⅢ19	5	30.74	0.74	78.84	23	2423	99.0701	DQQwJqyIpK	0	1	0	0	0	10.11	106	1173.8	1184.6	1179.2	6.4	0.2	25.9	0.063	34	105	17	2	0.00459354	0.180437	0.128941	5.02872	97.5174	0.00596354	0.635359	99.0701
DQQwJqyIpK	2020-08-01	202102	GⅢ16-GⅢ19	6	27.88	0.83	70.39	23	1963	98.8346	DQQwJqyIpK	0	1	0	0	0	10.11	106	1173.8	1184.6	1179.2	6.4	0.2	25.9	0.063	34	105	17	2	0.00459354	0.180437	0.128941	5.02872	97.5174	0.00668884	0.567262	98.8346
DQQwJqyIpK	2020-08-01	202103	GⅢ16-GⅢ19	7	30.85	0.67	67.32	21	2077	99.0146	DQQwJqyIpK	0	1	0	0	0	10.11	106	1173.8	1184.6	1179.2	6.4	0.2	25.9	0.063	34	105	17	2	0.00459354	0.180437	0.128941	5.02872	97.5174	0.00539942	0.542521	99.0146
jtgPXY1926	2020-08-13	202009	P2_4-P2_6	1	29.85	1.93	69.59	58	2078	97.3015	jtgPXY1926	0	1	0	0	0	9.87	200	966.7	979.4	973.05	4.4	1.4	25.6	0.17	35	165.98	27	2	0.944444	30.6401	8.58586	275.32	97.0098	1.10471	39.8327	97.3015
jtgPXY1926	2020-08-13	202010	P2_4-P2_6	2	30.69	2.83	74.43	87	2284	96.337	jtgPXY1926	0	1	0	0	0	9.87	200	966.7	979.4	973.05	4.4	1.4	25.6	0.17	35	165.98	27	2	0.944444	30.6401	8.58586	275.32	97.0098	1.61987	42.603	96.337
jtgPXY1926	2020-08-13	202012	P2_4-P2_6	3	31	1.94	61.58	60	1909	96.9458	jtgPXY1926	0	1	0	0	0	9.87	200	966.7	979.4	973.05	4.4	1.4	25.6	0.17	35	165.98	27	2	0.944444	30.6401	8.58586	275.32	97.0098	1.11044	35.2478	96.9458
jtgPXY1926	2020-08-13	202101	P2_4-P2_6	4	30.92	2.04	53.48	63	1653	96.3256	jtgPXY1926	0	1	0	0	0	9.87	200	966.7	979.4	973.05	4.4	1.4	25.6	0.17	35	165.98	27	2	0.944444	30.6401	8.58586	275.32	97.0098	1.16768	30.6114	96.3256
jtgPXY1926	2020-08-13	202102	P2_4-P2_6	5	28	2.13	48.1	60	1347	95.7595	jtgPXY1926	0	1	0	0	0	9.87	200	966.7	979.4	973.05	4.4	1.4	25.6	0.17	35	165.98	27	2	0.944444	30.6401	8.58586	275.32	97.0098	1.21919	27.532	95.7595
jtgPXY1926	2020-08-13	202103	P2_4-P2_6	6	30.81	1.9	47.61	59	1467	96.1624	jtgPXY1926	0	1	0	0	0	9.87	200	966.7	979.4	973.05	4.4	1.4	25.6	0.17	35	165.98	27	2	0.944444	30.6401	8.58586	275.32	97.0098	1.08754	27.2515	96.1624
jtgPXY1926	2020-08-13	202104	P2_4-P2_6	7	29.88	2.21	44.24	66	1322	95.2422	jtgPXY1926	0	1	0	0	0	9.87	200	966.7	979.4	973.05	4.4	1.4	25.6	0.17	35	165.98	27	2	0.944444	30.6401	8.58586	275.32	97.0098	1.26498	25.3226	95.2422
jtgPXY1926	2020-08-13	202105	P2_4-P2_6	8	31	2.01	50.01	62	1550	96.1361	jtgPXY1926	0	1	0	0	0	9.87	200	966.7	979.4	973.05	4.4	1.4	25.6	0.17	35	165.98	27	2	0.944444	30.6401	8.58586	275.32	97.0098	1.15051	28.6253	96.1361
nTcJqR9494	2020-08-06	202011	G1_2+3，2+3	1	11.67	1.24	94.3	14	1100	98.7021	nTcJqR9494	0	1	0	0	0	9.27	200	976.9	978.9	977.9	2	0.5	21.6	0.097	23	92.68	15	1	0	0	0	0	0	0.409394	31.1338	98.7021
nTcJqR9494	2020-08-06	202012	G1_2+3，2+3	2	30.81	1.96	92.89	60	2862	97.9336	nTcJqR9494	0	1	0	0	0	9.27	200	976.9	978.9	977.9	2	0.5	21.6	0.097	23	92.68	15	1	0	0	0	0	0	0.647107	30.6682	97.9336
nTcJqR9494	2020-08-06	202101	G1_2+3，2+3	3	30.52	2.79	92.29	85	2817	97.0656	nTcJqR9494	0	1	0	0	0	9.27	200	976.9	978.9	977.9	2	0.5	21.6	0.097	23	92.68	15	1	0	0	0	0	0	0.921137	30.4701	97.0656
nTcJqR9494	2020-08-06	202102	G1_2+3，2+3	4	28	3.54	89.15	99	2496	96.1808	nTcJqR9494	0	1	0	0	0	9.27	200	976.9	978.9	977.9	2	0.5	21.6	0.097	23	92.68	15	1	0	0	0	0	0	1.16875	29.4335	96.1808
nTcJqR9494	2020-08-06	202103	G1_2+3，2+3	5	30.92	2.81	87.89	87	2717	96.9019	nTcJqR9494	0	1	0	0	0	9.27	200	976.9	978.9	977.9	2	0.5	21.6	0.097	23	92.68	15	1	0	0	0	0	0	0.92774	29.0175	96.9019
nTcJqR9494	2020-08-06	202104	G1_2+3，2+3	6	29.83	2.3	87.49	69	2610	97.4385	nTcJqR9494	0	1	0	0	0	9.27	200	976.9	978.9	977.9	2	0.5	21.6	0.097	23	92.68	15	1	0	0	0	0	0	0.75936	28.8854	97.4385
nTcJqR9494	2020-08-06	202105	G1_2+3，2+3	7	30.9	2.9	85.56	90	2644	96.7217	nTcJqR9494	0	1	0	0	0	9.27	200	976.9	978.9	977.9	2	0.5	21.6	0.097	23	92.68	15	1	0	0	0	0	0	0.957454	28.2482	96.7217
nTcJqR9494	2020-08-06	202106	G1_2+3，2+3	8	29.77	3.53	84.2	105	2507	95.9763	nTcJqR9494	0	1	0	0	0	9.27	200	976.9	978.9	977.9	2	0.5	21.6	0.097	23	92.68	15	1	0	0	0	0	0	1.16545	27.7992	95.9763
nTcJqR9494	2020-08-06	202107	G1_2+3，2+3	9	30.98	3.85	82.52	119	2556	95.5424	nTcJqR9494	0	1	0	0	0	9.27	200	976.9	978.9	977.9	2	0.5	21.6	0.097	23	92.68	15	1	0	0	0	0	0	1.2711	27.2445	95.5424
nTcJqR9494	2020-08-06	202108	G1_2+3，2+3	10	31	3.11	76.42	96	2369	96.0895	nTcJqR9494	0	1	0	0	0	9.27	200	976.9	978.9	977.9	2	0.5	21.6	0.097	23	92.68	15	1	0	0	0	0	0	1.02679	25.2306	96.0895
nTcJqR9494	2020-08-06	202011	G1_6+7-G1_6+7	1	11.67	1.24	94.3	14	1100	98.7021	nTcJqR9494	0	1	0	0	0	9.27	200	983.8	987.9	985.85	1.9	0.9	23.6	0.046	35	102.48	16	1	0	0	0	0	0	0.349462	26.576	98.7021
nTcJqR9494	2020-08-06	202012	G1_6+7-G1_6+7	2	30.81	1.96	92.89	60	2862	97.9336	nTcJqR9494	0	1	0	0	0	9.27	200	983.8	987.9	985.85	1.9	0.9	23.6	0.046	35	102.48	16	1	0	0	0	0	0	0.552376	26.1787	97.9336
nTcJqR9494	2020-08-06	202101	G1_6+7-G1_6+7	3	30.52	2.79	92.29	85	2817	97.0656	nTcJqR9494	0	1	0	0	0	9.27	200	983.8	987.9	985.85	1.9	0.9	23.6	0.046	35	102.48	16	1	0	0	0	0	0	0.78629	26.0096	97.0656
nTcJqR9494	2020-08-06	202102	G1_6+7-G1_6+7	4	28	3.54	89.15	99	2496	96.1808	nTcJqR9494	0	1	0	0	0	9.27	200	983.8	987.9	985.85	1.9	0.9	23.6	0.046	35	102.48	16	1	0	0	0	0	0	0.997658	25.1246	96.1808
nTcJqR9494	2020-08-06	202103	G1_6+7-G1_6+7	5	30.92	2.81	87.89	87	2717	96.9019	nTcJqR9494	0	1	0	0	0	9.27	200	983.8	987.9	985.85	1.9	0.9	23.6	0.046	35	102.48	16	1	0	0	0	0	0	0.791926	24.7695	96.9019
nTcJqR9494	2020-08-06	202104	G1_6+7-G1_6+7	6	29.83	2.3	87.49	69	2610	97.4385	nTcJqR9494	0	1	0	0	0	9.27	200	983.8	987.9	985.85	1.9	0.9	23.6	0.046	35	102.48	16	1	0	0	0	0	0	0.648196	24.6568	97.4385
nTcJqR9494	2020-08-06	202105	G1_6+7-G1_6+7	7	30.9	2.9	85.56	90	2644	96.7217	nTcJqR9494	0	1	0	0	0	9.27	200	983.8	987.9	985.85	1.9	0.9	23.6	0.046	35	102.48	16	1	0	0	0	0	0	0.817291	24.1129	96.7217
nTcJqR9494	2020-08-06	202106	G1_6+7-G1_6+7	8	29.77	3.53	84.2	105	2507	95.9763	nTcJqR9494	0	1	0	0	0	9.27	200	983.8	987.9	985.85	1.9	0.9	23.6	0.046	35	102.48	16	1	0	0	0	0	0	0.99484	23.7296	95.9763
nTcJqR9494	2020-08-06	202107	G1_6+7-G1_6+7	9	30.98	3.85	82.52	119	2556	95.5424	nTcJqR9494	0	1	0	0	0	9.27	200	983.8	987.9	985.85	1.9	0.9	23.6	0.046	35	102.48	16	1	0	0	0	0	0	1.08502	23.2561	95.5424
nTcJqR9494	2020-08-06	202108	G1_6+7-G1_6+7	10	31	3.11	76.42	96	2369	96.0895	nTcJqR9494	0	1	0	0	0	9.27	200	983.8	987.9	985.85	1.9	0.9	23.6	0.046	35	102.48	16	1	0	0	0	0	0	0.876474	21.537	96.0895
wczKhj5821	2020-08-07	202010	P2_1-P2_2	1	31	1.08	71.44	34	2215	98.5108	wczKhj5821	0	1	0	0	0	8.93	175	1100.3	1105.6	1102.95	4.1	1	28.4	0.22	24	88.8	14	1	0.197211	4.36932	6.13546	135.418	95.6814	0.236653	15.6542	98.5108
wczKhj5821	2020-08-07	202011	P2_1-P2_2	2	30	1.27	85.4	38	2562	98.5347	wczKhj5821	0	1	0	0	0	8.93	175	1100.3	1105.6	1102.95	4.1	1	28.4	0.22	24	88.8	14	1	0.197211	4.36932	6.13546	135.418	95.6814	0.278287	18.7131	98.5347
wczKhj5821	2020-08-07	202012	P2_1-P2_2	3	31	1.12	88.44	35	2742	98.7494	wczKhj5821	0	1	0	0	0	8.93	175	1100.3	1105.6	1102.95	4.1	1	28.4	0.22	24	88.8	14	1	0.197211	4.36932	6.13546	135.418	95.6814	0.245418	19.3793	98.7494
wczKhj5821	2020-08-07	202101	P2_1-P2_2	4	31	1.28	91.01	40	2821	98.6131	wczKhj5821	0	1	0	0	0	8.93	175	1100.3	1105.6	1102.95	4.1	1	28.4	0.22	24	88.8	14	1	0.197211	4.36932	6.13546	135.418	95.6814	0.280478	19.9424	98.6131
wczKhj5821	2020-08-07	202102	P2_1-P2_2	5	27.99	1.57	92.23	44	2581	98.3262	wczKhj5821	0	1	0	0	0	8.93	175	1100.3	1105.6	1102.95	4.1	1	28.4	0.22	24	88.8	14	1	0.197211	4.36932	6.13546	135.418	95.6814	0.344024	20.2098	98.3262
wczKhj5821	2020-08-07	202103	P2_1-P2_2	6	31	1.68	94.08	52	2917	98.2456	wczKhj5821	0	1	0	0	0	8.93	175	1100.3	1105.6	1102.95	4.1	1	28.4	0.22	24	88.8	14	1	0.197211	4.36932	6.13546	135.418	95.6814	0.368127	20.6151	98.2456
wczKhj5821	2020-08-07	202104	P2_1-P2_2	7	30	1.44	94.97	43	2849	98.5064	wczKhj5821	0	1	0	0	0	8.93	175	1100.3	1105.6	1102.95	4.1	1	28.4	0.22	24	88.8	14	1	0.197211	4.36932	6.13546	135.418	95.6814	0.315538	20.8102	98.5064
wczKhj5821	2020-08-07	202105	P2_1-P2_2	8	31	1.23	90.44	38	2804	98.6582	wczKhj5821	0	1	0	0	0	8.93	175	1100.3	1105.6	1102.95	4.1	1	28.4	0.22	24	88.8	14	1	0.197211	4.36932	6.13546	135.418	95.6814	0.269522	19.8175	98.6582
wczKhj5821	2020-08-07	202106	P2_1-P2_2	9	29.99	1.68	91.38	50	2741	98.1947	wczKhj5821	0	1	0	0	0	8.93	175	1100.3	1105.6	1102.95	4.1	1	28.4	0.22	24	88.8	14	1	0.197211	4.36932	6.13546	135.418	95.6814	0.368127	20.0235	98.1947
wczKhj5821	2020-08-07	202107	P2_1-P2_2	10	31	1.63	87.72	50	2719	98.1757	wczKhj5821	0	1	0	0	0	8.93	175	1100.3	1105.6	1102.95	4.1	1	28.4	0.22	24	88.8	14	1	0.197211	4.36932	6.13546	135.418	95.6814	0.357171	19.2215	98.1757
wczKhj5821	2020-08-07	202108	P2_1-P2_2	11	31	1.84	105.24	57	3262	98.2817	wczKhj5821	0	1	0	0	0	8.93	175	1100.3	1105.6	1102.95	4.1	1	28.4	0.22	24	88.8	14	1	0.197211	4.36932	6.13546	135.418	95.6814	0.403187	23.0606	98.2817
wczKhj5821	2020-08-07	202010	P2_3-P2_5	1	31	1.08	71.44	34	2215	98.5108	wczKhj5821	0	1	0	0	0	8.93	175	1107.2	1115.1	1111.15	4.1	1	26.6	0.036	24	171.11	27	2	0.0322709	0.71498	1.00398	22.1594	95.6814	0.0387251	2.56159	98.5108
wczKhj5821	2020-08-07	202011	P2_3-P2_5	2	30	1.27	85.4	38	2562	98.5347	wczKhj5821	0	1	0	0	0	8.93	175	1107.2	1115.1	1111.15	4.1	1	26.6	0.036	24	171.11	27	2	0.0322709	0.71498	1.00398	22.1594	95.6814	0.0455378	3.06215	98.5347
wczKhj5821	2020-08-07	202012	P2_3-P2_5	3	31	1.12	88.44	35	2742	98.7494	wczKhj5821	0	1	0	0	0	8.93	175	1107.2	1115.1	1111.15	4.1	1	26.6	0.036	24	171.11	27	2	0.0322709	0.71498	1.00398	22.1594	95.6814	0.0401594	3.17116	98.7494
wczKhj5821	2020-08-07	202101	P2_3-P2_5	4	31	1.28	91.01	40	2821	98.6131	wczKhj5821	0	1	0	0	0	8.93	175	1107.2	1115.1	1111.15	4.1	1	26.6	0.036	24	171.11	27	2	0.0322709	0.71498	1.00398	22.1594	95.6814	0.0458964	3.26331	98.6131
wczKhj5821	2020-08-07	202102	P2_3-P2_5	5	27.99	1.57	92.23	44	2581	98.3262	wczKhj5821	0	1	0	0	0	8.93	175	1107.2	1115.1	1111.15	4.1	1	26.6	0.036	24	171.11	27	2	0.0322709	0.71498	1.00398	22.1594	95.6814	0.0562948	3.30705	98.3262
wczKhj5821	2020-08-07	202103	P2_3-P2_5	6	31	1.68	94.08	52	2917	98.2456	wczKhj5821	0	1	0	0	0	8.93	175	1107.2	1115.1	1111.15	4.1	1	26.6	0.036	24	171.11	27	2	0.0322709	0.71498	1.00398	22.1594	95.6814	0.060239	3.37339	98.2456
wczKhj5821	2020-08-07	202104	P2_3-P2_5	7	30	1.44	94.97	43	2849	98.5064	wczKhj5821	0	1	0	0	0	8.93	175	1107.2	1115.1	1111.15	4.1	1	26.6	0.036	24	171.11	27	2	0.0322709	0.71498	1.00398	22.1594	95.6814	0.0516335	3.4053	98.5064
wczKhj5821	2020-08-07	202105	P2_3-P2_5	8	31	1.23	90.44	38	2804	98.6582	wczKhj5821	0	1	0	0	0	8.93	175	1107.2	1115.1	1111.15	4.1	1	26.6	0.036	24	171.11	27	2	0.0322709	0.71498	1.00398	22.1594	95.6814	0.0441036	3.24287	98.6582
wczKhj5821	2020-08-07	202106	P2_3-P2_5	9	29.99	1.68	91.38	50	2741	98.1947	wczKhj5821	0	1	0	0	0	8.93	175	1107.2	1115.1	1111.15	4.1	1	26.6	0.036	24	171.11	27	2	0.0322709	0.71498	1.00398	22.1594	95.6814	0.060239	3.27657	98.1947
wczKhj5821	2020-08-07	202107	P2_3-P2_5	10	31	1.63	87.72	50	2719	98.1757	wczKhj5821	0	1	0	0	0	8.93	175	1107.2	1115.1	1111.15	4.1	1	26.6	0.036	24	171.11	27	2	0.0322709	0.71498	1.00398	22.1594	95.6814	0.0584462	3.14534	98.1757
wczKhj5821	2020-08-07	202108	P2_3-P2_5	11	31	1.84	105.24	57	3262	98.2817	wczKhj5821	0	1	0	0	0	8.93	175	1107.2	1115.1	1111.15	4.1	1	26.6	0.036	24	171.11	27	2	0.0322709	0.71498	1.00398	22.1594	95.6814	0.0659761	3.77355	98.2817
eRvHGk2956	2020-08-30	202009	S2_13-S2_14	1	23.46	3.87	38.31	91	899	90.825	eRvHGk2956	0	1	0	0	0	9.71	200	1073.6	1074.6	1074.1	1.5	0.8	30.4	0.2	47	79.8	12	1	0.549744	17.7395	4.92308	160	96.9942	3.17538	31.4338	90.825
eRvHGk2956	2020-08-30	202010	S2_13-S2_14	2	30.72	1.94	10.59	60	325	84.5172	eRvHGk2956	0	1	0	0	0	9.71	200	1073.6	1074.6	1074.1	1.5	0.8	30.4	0.2	47	79.8	12	1	0.549744	17.7395	4.92308	160	96.9942	1.59179	8.68923	84.5172
eRvHGk2956	2020-08-30	202011	S2_13-S2_14	3	29.98	1.09	11.61	33	348	91.4173	eRvHGk2956	0	1	0	0	0	9.71	200	1073.6	1074.6	1074.1	1.5	0.8	30.4	0.2	47	79.8	12	1	0.549744	17.7395	4.92308	160	96.9942	0.894359	9.52615	91.4173
eRvHGk2956	2020-08-30	202012	S2_13-S2_14	4	31	2.22	12.57	69	390	84.9899	eRvHGk2956	0	1	0	0	0	9.71	200	1073.6	1074.6	1074.1	1.5	0.8	30.4	0.2	47	79.8	12	1	0.549744	17.7395	4.92308	160	96.9942	1.82154	10.3138	84.9899
eRvHGk2956	2020-08-30	202101	S2_13-S2_14	5	31	1.48	17.3	46	536	92.1193	eRvHGk2956	0	1	0	0	0	9.71	200	1073.6	1074.6	1074.1	1.5	0.8	30.4	0.2	47	79.8	12	1	0.549744	17.7395	4.92308	160	96.9942	1.21436	14.1949	92.1193
eRvHGk2956	2020-08-30	202102	S2_13-S2_14	6	27.75	1.29	18.47	36	512	93.4717	eRvHGk2956	0	1	0	0	0	9.71	200	1073.6	1074.6	1074.1	1.5	0.8	30.4	0.2	47	79.8	12	1	0.549744	17.7395	4.92308	160	96.9942	1.05846	15.1549	93.4717
eRvHGk2956	2020-08-30	202103	S2_13-S2_14	7	30.75	1.28	17.31	39	532	93.1146	eRvHGk2956	0	1	0	0	0	9.71	200	1073.6	1074.6	1074.1	1.5	0.8	30.4	0.2	47	79.8	12	1	0.549744	17.7395	4.92308	160	96.9942	1.05026	14.2031	93.1146
eRvHGk2956	2020-08-30	202106	S2_13-S2_14	8	29.41	1.13	22.75	33	669	95.268	eRvHGk2956	0	1	0	0	0	9.71	200	1073.6	1074.6	1074.1	1.5	0.8	30.4	0.2	47	79.8	12	1	0.549744	17.7395	4.92308	160	96.9942	0.927179	18.6667	95.268
eRvHGk2956	2020-08-30	202009	S3_5+6\2-S3_9	1	23.46	3.87	38.31	91	899	90.825	eRvHGk2956	0	1	0	0	0	9.71	200	1101.5	1114.1	1107.8	3.1	0.5	28.3	0.07	40	91.56	14	1	0.120256	3.88051	1.07692	35	96.9942	0.694615	6.87615	90.825
eRvHGk2956	2020-08-30	202010	S3_5+6\2-S3_9	2	30.72	1.94	10.59	60	325	84.5172	eRvHGk2956	0	1	0	0	0	9.71	200	1101.5	1114.1	1107.8	3.1	0.5	28.3	0.07	40	91.56	14	1	0.120256	3.88051	1.07692	35	96.9942	0.348205	1.90077	84.5172
eRvHGk2956	2020-08-30	202011	S3_5+6\2-S3_9	3	29.98	1.09	11.61	33	348	91.4173	eRvHGk2956	0	1	0	0	0	9.71	200	1101.5	1114.1	1107.8	3.1	0.5	28.3	0.07	40	91.56	14	1	0.120256	3.88051	1.07692	35	96.9942	0.195641	2.08385	91.4173
eRvHGk2956	2020-08-30	202012	S3_5+6\2-S3_9	4	31	2.22	12.57	69	390	84.9899	eRvHGk2956	0	1	0	0	0	9.71	200	1101.5	1114.1	1107.8	3.1	0.5	28.3	0.07	40	91.56	14	1	0.120256	3.88051	1.07692	35	96.9942	0.398462	2.25615	84.9899
eRvHGk2956	2020-08-30	202101	S3_5+6\2-S3_9	5	31	1.48	17.3	46	536	92.1193	eRvHGk2956	0	1	0	0	0	9.71	200	1101.5	1114.1	1107.8	3.1	0.5	28.3	0.07	40	91.56	14	1	0.120256	3.88051	1.07692	35	96.9942	0.265641	3.10513	92.1193
eRvHGk2956	2020-08-30	202102	S3_5+6\2-S3_9	6	27.75	1.29	18.47	36	512	93.4717	eRvHGk2956	0	1	0	0	0	9.71	200	1101.5	1114.1	1107.8	3.1	0.5	28.3	0.07	40	91.56	14	1	0.120256	3.88051	1.07692	35	96.9942	0.231538	3.31513	93.4717
eRvHGk2956	2020-08-30	202103	S3_5+6\2-S3_9	7	30.75	1.28	17.31	39	532	93.1146	eRvHGk2956	0	1	0	0	0	9.71	200	1101.5	1114.1	1107.8	3.1	0.5	28.3	0.07	40	91.56	14	1	0.120256	3.88051	1.07692	35	96.9942	0.229744	3.10692	93.1146
eRvHGk2956	2020-08-30	202106	S3_5+6\2-S3_9	8	29.41	1.13	22.75	33	669	95.268	eRvHGk2956	0	1	0	0	0	9.71	200	1101.5	1114.1	1107.8	3.1	0.5	28.3	0.07	40	91.56	14	1	0.120256	3.88051	1.07692	35	96.9942	0.202821	4.08333	95.268
DQUiGrRNZj	2020-08-22	202009	GⅡ1-GⅡ9	1	28.56	0.68	98.12	19	2803	99.3117	DQUiGrRNZj	0	1	0	0	0	10.87	106	1095.2	1111.8	1103.5	8.2	3	30.9	0.435	32	113.52	17	2	0	0	0	0	0	0.291104	42.0045	99.3117
DQUiGrRNZj	2020-08-22	202010	GⅡ1-GⅡ9	2	20.98	0.5	85.96	11	1803	99.4217	DQUiGrRNZj	0	1	0	0	0	10.87	106	1095.2	1111.8	1103.5	8.2	3	30.9	0.435	32	113.52	17	2	0	0	0	0	0	0.214047	36.7989	99.4217
DQUiGrRNZj	2020-08-22	202009	GⅡ12-GⅡ18	1	28.56	0.68	98.12	19	2803	99.3117	DQUiGrRNZj	0	1	0	0	0	10.87	106	1116.3	1134.2	1125.25	6.5	2.4	30.1	0.211	31	113.52	17	2	0	0	0	0	0	0.112962	16.2997	99.3117
DQUiGrRNZj	2020-08-22	202010	GⅡ12-GⅡ18	2	20.98	0.5	85.96	11	1803	99.4217	DQUiGrRNZj	0	1	0	0	0	10.87	106	1116.3	1134.2	1125.25	6.5	2.4	30.1	0.211	31	113.52	17	2	0	0	0	0	0	0.08306	14.2797	99.4217
DQUiGrRNZj	2020-08-22	202009	GⅡ25-GⅡ30	1	28.56	0.68	98.12	19	2803	99.3117	DQUiGrRNZj	0	1	0	0	0	10.87	106	1156.3	1170.3	1163.3	7.1	1	29.3	0.205	33	114	17	2	0	0	0	0	0	0.0457289	6.59841	99.3117
DQUiGrRNZj	2020-08-22	202010	GⅡ25-GⅡ30	2	20.98	0.5	85.96	11	1803	99.4217	DQUiGrRNZj	0	1	0	0	0	10.87	106	1156.3	1170.3	1163.3	7.1	1	29.3	0.205	33	114	17	2	0	0	0	0	0	0.0336242	5.78067	99.4217
DQUiGrRNZj	2020-08-22	202009	GⅢ1-GⅢ5	1	28.56	0.68	98.12	19	2803	99.3117	DQUiGrRNZj	0	1	0	0	0	10.87	106	1184	1197.3	1190.65	9.8	2.5	30.1	0.408	33	114	17	2	0	0	0	0	0	0.227529	32.8311	99.3117
DQUiGrRNZj	2020-08-22	202010	GⅢ1-GⅢ5	2	20.98	0.5	85.96	11	1803	99.4217	DQUiGrRNZj	0	1	0	0	0	10.87	106	1184	1197.3	1190.65	9.8	2.5	30.1	0.408	33	114	17	2	0	0	0	0	0	0.167301	28.7624	99.4217
DQ1WFXoGl0	2020-09-10	202010	S1_2-S1_3	1	23.81	9.49	76.15	226	1813	88.9187	DQ1WFXoGl0	0	1	0	0	0	8.08	106	1004.9	1011.4	1008.15	1.2	0.2	28.1	0.152	42	2208	41	1	0	0	0	0	0	0.483648	3.88091	88.9187
DQ1WFXoGl0	2020-09-10	202011	S1_2-S1_3	2	29.87	10.26	67.48	306	2016	86.8022	DQ1WFXoGl0	0	1	0	0	0	8.08	106	1004.9	1011.4	1008.15	1.2	0.2	28.1	0.152	42	2208	41	1	0	0	0	0	0	0.52289	3.43905	86.8022
DQ1WFXoGl0	2020-09-10	202012	S1_2-S1_3	3	28.92	7.16	82.2	207	2377	91.9875	DQ1WFXoGl0	0	1	0	0	0	8.08	106	1004.9	1011.4	1008.15	1.2	0.2	28.1	0.152	42	2208	41	1	0	0	0	0	0	0.364902	4.18924	91.9875
DQ1WFXoGl0	2020-09-10	202101	S1_2-S1_3	4	30.69	10.13	102.36	311	3141	90.9948	DQ1WFXoGl0	0	1	0	0	0	8.08	106	1004.9	1011.4	1008.15	1.2	0.2	28.1	0.152	42	2208	41	1	0	0	0	0	0	0.516265	5.21667	90.9948
DQ1WFXoGl0	2020-09-10	202102	S1_2-S1_3	5	27.85	9.31	98.77	259	2751	91.386	DQ1WFXoGl0	0	1	0	0	0	8.08	106	1004.9	1011.4	1008.15	1.2	0.2	28.1	0.152	42	2208	41	1	0	0	0	0	0	0.474474	5.03371	91.386
DQ1WFXoGl0	2020-09-10	202103	S1_2-S1_3	6	30.9	9.62	99.28	297	3068	91.1662	DQ1WFXoGl0	0	1	0	0	0	8.08	106	1004.9	1011.4	1008.15	1.2	0.2	28.1	0.152	42	2208	41	1	0	0	0	0	0	0.490273	5.0597	91.1662
DQ1WFXoGl0	2020-09-10	202104	S1_2-S1_3	7	29.96	9.92	100.85	297	3021	91.0445	DQ1WFXoGl0	0	1	0	0	0	8.08	106	1004.9	1011.4	1008.15	1.2	0.2	28.1	0.152	42	2208	41	1	0	0	0	0	0	0.505562	5.13972	91.0445
DQ1WFXoGl0	2020-09-10	202105	S1_2-S1_3	8	30.94	7.66	104.33	237	3228	93.1601	DQ1WFXoGl0	0	1	0	0	0	8.08	106	1004.9	1011.4	1008.15	1.2	0.2	28.1	0.152	42	2208	41	1	0	0	0	0	0	0.390384	5.31707	93.1601
DQ1WFXoGl0	2020-09-10	202106	S1_2-S1_3	9	29.92	5.52	104.48	165	3126	94.9818	DQ1WFXoGl0	0	1	0	0	0	8.08	106	1004.9	1011.4	1008.15	1.2	0.2	28.1	0.152	42	2208	41	1	0	0	0	0	0	0.281321	5.32471	94.9818
DQ1WFXoGl0	2020-09-10	202107	S1_2-S1_3	10	28.06	4.88	104.93	137	2945	95.556	DQ1WFXoGl0	0	1	0	0	0	8.08	106	1004.9	1011.4	1008.15	1.2	0.2	28.1	0.152	42	2208	41	1	0	0	0	0	0	0.248704	5.34765	95.556
DQ1WFXoGl0	2020-09-10	202108	S1_2-S1_3	11	30.97	4.9	106.4	152	3295	95.5975	DQ1WFXoGl0	0	1	0	0	0	8.08	106	1004.9	1011.4	1008.15	1.2	0.2	28.1	0.152	42	2208	41	1	0	0	0	0	0	0.249723	5.42256	95.5975
DQ1WFXoGl0	2020-09-10	202109	S1_2-S1_3	12	29.79	3.82	104.73	114	3120	96.4809	DQ1WFXoGl0	0	1	0	0	0	8.08	106	1004.9	1011.4	1008.15	1.2	0.2	28.1	0.152	42	2208	41	1	0	0	0	0	0	0.194682	5.33746	96.4809
dQOlyC5970	2020-10-21	202011	P2_1-P2_2	1	29.98	3.47	69.43	104	2081	95.2401	dQOlyC5970	0	1	0	0	0	7.38	200	912.6	915.4	914	2	1.1	29.2	0.16	39	106.75	16	1	0	0	0	0	0	3.47	69.43	95.2401
dQOlyC5970	2020-10-21	202012	P2_1-P2_2	2	31	4.58	73.36	142	2274	94.1237	dQOlyC5970	0	1	0	0	0	7.38	200	912.6	915.4	914	2	1.1	29.2	0.16	39	106.75	16	1	0	0	0	0	0	4.58	73.36	94.1237
dQOlyC5970	2020-10-21	202101	P2_1-P2_2	3	31	5.41	75.3	168	2334	93.297	dQOlyC5970	0	1	0	0	0	7.38	200	912.6	915.4	914	2	1.1	29.2	0.16	39	106.75	16	1	0	0	0	0	0	5.41	75.3	93.297
dQOlyC5970	2020-10-21	202102	P2_1-P2_2	4	27.92	5.27	76.47	147	2135	93.5527	dQOlyC5970	0	1	0	0	0	7.38	200	912.6	915.4	914	2	1.1	29.2	0.16	39	106.75	16	1	0	0	0	0	0	5.27	76.47	93.5527
dQOlyC5970	2020-10-21	202103	P2_1-P2_2	5	30.93	6	75.37	186	2331	92.6263	dQOlyC5970	0	1	0	0	0	7.38	200	912.6	915.4	914	2	1.1	29.2	0.16	39	106.75	16	1	0	0	0	0	0	6	75.37	92.6263
dQOlyC5970	2020-10-21	202104	P2_1-P2_2	6	29.98	6.07	72.03	182	2159	92.2279	dQOlyC5970	0	1	0	0	0	7.38	200	912.6	915.4	914	2	1.1	29.2	0.16	39	106.75	16	1	0	0	0	0	0	6.07	72.03	92.2279
dQOlyC5970	2020-10-21	202105	P2_1-P2_2	7	31	5.2	66.32	161	2056	92.7293	dQOlyC5970	0	1	0	0	0	7.38	200	912.6	915.4	914	2	1.1	29.2	0.16	39	106.75	16	1	0	0	0	0	0	5.2	66.32	92.7293
dQOlyC5970	2020-10-21	202106	P2_1-P2_2	8	29.99	6.48	65.26	194	1957	90.9674	dQOlyC5970	0	1	0	0	0	7.38	200	912.6	915.4	914	2	1.1	29.2	0.16	39	106.75	16	1	0	0	0	0	0	6.48	65.26	90.9674
dQOlyC5970	2020-10-21	202107	P2_1-P2_2	9	30.38	6.28	65.12	191	1978	91.2045	dQOlyC5970	0	1	0	0	0	7.38	200	912.6	915.4	914	2	1.1	29.2	0.16	39	106.75	16	1	0	0	0	0	0	6.28	65.12	91.2045
dQOlyC5970	2020-10-21	202108	P2_1-P2_2	10	30.48	5.85	62.05	178	1891	91.3844	dQOlyC5970	0	1	0	0	0	7.38	200	912.6	915.4	914	2	1.1	29.2	0.16	39	106.75	16	1	0	0	0	0	0	5.85	62.05	91.3844
dQOlyC5970	2020-10-21	202109	P2_1-P2_2	11	28.94	5.57	50.52	161	1462	90.0695	dQOlyC5970	0	1	0	0	0	7.38	200	912.6	915.4	914	2	1.1	29.2	0.16	39	106.75	16	1	0	0	0	0	0	5.57	50.52	90.0695
dQOlyC5970	2020-10-21	202110	P2_1-P2_2	12	30.29	3.58	36.77	108	1114	91.1276	dQOlyC5970	0	1	0	0	0	7.38	200	912.6	915.4	914	2	1.1	29.2	0.16	39	106.75	16	1	0	0	0	0	0	3.58	36.77	91.1276
DQDMpFbUBj	2020-10-18	202011	G3_16-G3_17	1	29.96	1.22	47.65	36	1427	97.5036	DQDMpFbUBj	0	1	0	0	0	10.2	150	1110.9	1116.6	1113.75	4	1.1	27.2	0.128	30	68.9	11	1	0.9416	19.1752	25.52	512.16	95.3193	1.0736	41.932	97.5036
DQDMpFbUBj	2020-10-18	202101	G3_16-G3_17	2	30.96	1.2	43	37	1331	97.2851	DQDMpFbUBj	0	1	0	0	0	10.2	150	1110.9	1116.6	1113.75	4	1.1	27.2	0.128	30	68.9	11	1	0.9416	19.1752	25.52	512.16	95.3193	1.056	37.84	97.2851
DQDMpFbUBj	2020-10-18	202102	G3_16-G3_17	3	27.83	1.33	30.9	37	860	95.8734	DQDMpFbUBj	0	1	0	0	0	10.2	150	1110.9	1116.6	1113.75	4	1.1	27.2	0.128	30	68.9	11	1	0.9416	19.1752	25.52	512.16	95.3193	1.1704	27.192	95.8734
DQDMpFbUBj	2020-10-18	202104	G3_16-G3_17	4	25.75	1.88	35	48	901	94.9024	DQDMpFbUBj	0	1	0	0	0	10.2	150	1110.9	1116.6	1113.75	4	1.1	27.2	0.128	30	68.9	11	1	0.9416	19.1752	25.52	512.16	95.3193	1.6544	30.8	94.9024
DQDMpFbUBj	2020-10-18	202105	G3_16-G3_17	5	30.85	1.72	35.43	53	1093	95.3701	DQDMpFbUBj	0	1	0	0	0	10.2	150	1110.9	1116.6	1113.75	4	1.1	27.2	0.128	30	68.9	11	1	0.9416	19.1752	25.52	512.16	95.3193	1.5136	31.1784	95.3701
DQDMpFbUBj	2020-10-18	202106	G3_16-G3_17	6	29.58	1.64	36.33	48	1075	95.6808	DQDMpFbUBj	0	1	0	0	0	10.2	150	1110.9	1116.6	1113.75	4	1.1	27.2	0.128	30	68.9	11	1	0.9416	19.1752	25.52	512.16	95.3193	1.4432	31.9704	95.6808
DQDMpFbUBj	2020-10-18	202107	G3_16-G3_17	7	30.94	1.82	33.24	56	1028	94.8089	DQDMpFbUBj	0	1	0	0	0	10.2	150	1110.9	1116.6	1113.75	4	1.1	27.2	0.128	30	68.9	11	1	0.9416	19.1752	25.52	512.16	95.3193	1.6016	29.2512	94.8089
DQDMpFbUBj	2020-10-18	202108	G3_16-G3_17	8	30.95	1.34	27.69	41	857	95.3841	DQDMpFbUBj	0	1	0	0	0	10.2	150	1110.9	1116.6	1113.75	4	1.1	27.2	0.128	30	68.9	11	1	0.9416	19.1752	25.52	512.16	95.3193	1.1792	24.3672	95.3841
DQDMpFbUBj	2020-10-18	202109	G3_16-G3_17	9	29.51	1.33	26.21	39	774	95.1707	DQDMpFbUBj	0	1	0	0	0	10.2	150	1110.9	1116.6	1113.75	4	1.1	27.2	0.128	30	68.9	11	1	0.9416	19.1752	25.52	512.16	95.3193	1.1704	23.0648	95.1707
DQDMpFbUBj	2020-10-18	202110	G3_16-G3_17	10	30.94	1.31	24.47	40	757	94.9185	DQDMpFbUBj	0	1	0	0	0	10.2	150	1110.9	1116.6	1113.75	4	1.1	27.2	0.128	30	68.9	11	1	0.9416	19.1752	25.52	512.16	95.3193	1.1528	21.5336	94.9185
dDLijK8072	2020-10-24	202011	GⅠ1-GⅠ4+5\1	1	25.73	1.51	69.71	39	1794	97.8798	dDLijK8072	0	1	0	0	0	9.06	300	990.7	998.7	994.7	1.6	0.3	27.9	0.046	48	84.74	13	1	0	0	0	0	0	0.0355597	1.64163	97.8798
dDLijK8072	2020-10-24	202012	GⅠ1-GⅠ4+5\1	2	30.98	3.49	76.27	108	2363	95.6244	dDLijK8072	0	1	0	0	0	9.06	300	990.7	998.7	994.7	1.6	0.3	27.9	0.046	48	84.74	13	1	0	0	0	0	0	0.0821877	1.79612	95.6244
dDLijK8072	2020-10-24	202101	GⅠ1-GⅠ4+5\1	3	30.96	2.77	60.05	86	1859	95.5906	dDLijK8072	0	1	0	0	0	9.06	300	990.7	998.7	994.7	1.6	0.3	27.9	0.046	48	84.74	13	1	0	0	0	0	0	0.0652321	1.41415	95.5906
dDLijK8072	2020-10-24	202102	GⅠ1-GⅠ4+5\1	4	28	2.81	47.92	79	1342	94.4609	dDLijK8072	0	1	0	0	0	9.06	300	990.7	998.7	994.7	1.6	0.3	27.9	0.046	48	84.74	13	1	0	0	0	0	0	0.0661741	1.12849	94.4609
dDLijK8072	2020-10-24	202103	GⅠ1-GⅠ4+5\1	5	31	2.69	47.56	83	1474	94.6468	dDLijK8072	0	1	0	0	0	9.06	300	990.7	998.7	994.7	1.6	0.3	27.9	0.046	48	84.74	13	1	0	0	0	0	0	0.0633481	1.12001	94.6468
dDLijK8072	2020-10-24	202104	GⅠ1-GⅠ4+5\1	6	27	2.73	48.21	74	1302	94.6408	dDLijK8072	0	1	0	0	0	9.06	300	990.7	998.7	994.7	1.6	0.3	27.9	0.046	48	84.74	13	1	0	0	0	0	0	0.0642901	1.13532	94.6408
dDLijK8072	2020-10-24	202105	GⅠ1-GⅠ4+5\1	7	30.92	2.02	49.56	62	1532	96.0838	dDLijK8072	0	1	0	0	0	9.06	300	990.7	998.7	994.7	1.6	0.3	27.9	0.046	48	84.74	13	1	0	0	0	0	0	0.04757	1.16711	96.0838
dDLijK8072	2020-10-24	202106	GⅠ1-GⅠ4+5\1	8	29.63	1.97	49.92	58	1479	96.2035	dDLijK8072	0	1	0	0	0	9.06	300	990.7	998.7	994.7	1.6	0.3	27.9	0.046	48	84.74	13	1	0	0	0	0	0	0.0463925	1.17559	96.2035
dDLijK8072	2020-10-24	202107	GⅠ1-GⅠ4+5\1	9	30.31	1.66	50.29	50	1524	96.8046	dDLijK8072	0	1	0	0	0	9.06	300	990.7	998.7	994.7	1.6	0.3	27.9	0.046	48	84.74	13	1	0	0	0	0	0	0.0390922	1.1843	96.8046
dDLijK8072	2020-10-24	202108	GⅠ1-GⅠ4+5\1	10	30.79	1.02	51.22	31	1577	98.0475	dDLijK8072	0	1	0	0	0	9.06	300	990.7	998.7	994.7	1.6	0.3	27.9	0.046	48	84.74	13	1	0	0	0	0	0	0.0240205	1.2062	98.0475
dDLijK8072	2020-10-24	202109	GⅠ1-GⅠ4+5\1	11	29.71	1.35	50.96	40	1514	97.4192	dDLijK8072	0	1	0	0	0	9.06	300	990.7	998.7	994.7	1.6	0.3	27.9	0.046	48	84.74	13	1	0	0	0	0	0	0.0317918	1.20008	97.4192
dDLijK8072	2020-10-24	202110	GⅠ1-GⅠ4+5\1	12	31	1.32	50.8	41	1575	97.4674	dDLijK8072	0	1	0	0	0	9.06	300	990.7	998.7	994.7	1.6	0.3	27.9	0.046	48	84.74	13	1	0	0	0	0	0	0.0310853	1.19631	97.4674
dDLijK8072	2020-10-24	202011	GⅠ4+5\2-GⅠ4+5\3	1	25.73	1.51	69.71	39	1794	97.8798	dDLijK8072	0	1	0	0	0	9.06	300	1000.3	1001.6	1000.95	1.1	0.4	21.1	0.033	45	84.7	13	1	0	0	0	0	0	0.0340137	1.57026	97.8798
dDLijK8072	2020-10-24	202012	GⅠ4+5\2-GⅠ4+5\3	2	30.98	3.49	76.27	108	2363	95.6244	dDLijK8072	0	1	0	0	0	9.06	300	1000.3	1001.6	1000.95	1.1	0.4	21.1	0.033	45	84.7	13	1	0	0	0	0	0	0.0786143	1.71803	95.6244
dDLijK8072	2020-10-24	202101	GⅠ4+5\2-GⅠ4+5\3	3	30.96	2.77	60.05	86	1859	95.5906	dDLijK8072	0	1	0	0	0	9.06	300	1000.3	1001.6	1000.95	1.1	0.4	21.1	0.033	45	84.7	13	1	0	0	0	0	0	0.0623959	1.35266	95.5906
dDLijK8072	2020-10-24	202102	GⅠ4+5\2-GⅠ4+5\3	4	28	2.81	47.92	79	1342	94.4609	dDLijK8072	0	1	0	0	0	9.06	300	1000.3	1001.6	1000.95	1.1	0.4	21.1	0.033	45	84.7	13	1	0	0	0	0	0	0.0632969	1.07943	94.4609
dDLijK8072	2020-10-24	202103	GⅠ4+5\2-GⅠ4+5\3	5	31	2.69	47.56	83	1474	94.6468	dDLijK8072	0	1	0	0	0	9.06	300	1000.3	1001.6	1000.95	1.1	0.4	21.1	0.033	45	84.7	13	1	0	0	0	0	0	0.0605939	1.07132	94.6468
dDLijK8072	2020-10-24	202104	GⅠ4+5\2-GⅠ4+5\3	6	27	2.73	48.21	74	1302	94.6408	dDLijK8072	0	1	0	0	0	9.06	300	1000.3	1001.6	1000.95	1.1	0.4	21.1	0.033	45	84.7	13	1	0	0	0	0	0	0.0614949	1.08596	94.6408
dDLijK8072	2020-10-24	202105	GⅠ4+5\2-GⅠ4+5\3	7	30.92	2.02	49.56	62	1532	96.0838	dDLijK8072	0	1	0	0	0	9.06	300	1000.3	1001.6	1000.95	1.1	0.4	21.1	0.033	45	84.7	13	1	0	0	0	0	0	0.0455017	1.11637	96.0838
dDLijK8072	2020-10-24	202106	GⅠ4+5\2-GⅠ4+5\3	8	29.63	1.97	49.92	58	1479	96.2035	dDLijK8072	0	1	0	0	0	9.06	300	1000.3	1001.6	1000.95	1.1	0.4	21.1	0.033	45	84.7	13	1	0	0	0	0	0	0.0443754	1.12448	96.2035
dDLijK8072	2020-10-24	202107	GⅠ4+5\2-GⅠ4+5\3	9	30.31	1.66	50.29	50	1524	96.8046	dDLijK8072	0	1	0	0	0	9.06	300	1000.3	1001.6	1000.95	1.1	0.4	21.1	0.033	45	84.7	13	1	0	0	0	0	0	0.0373925	1.13281	96.8046
dDLijK8072	2020-10-24	202108	GⅠ4+5\2-GⅠ4+5\3	10	30.79	1.02	51.22	31	1577	98.0475	dDLijK8072	0	1	0	0	0	9.06	300	1000.3	1001.6	1000.95	1.1	0.4	21.1	0.033	45	84.7	13	1	0	0	0	0	0	0.0229761	1.15376	98.0475
dDLijK8072	2020-10-24	202109	GⅠ4+5\2-GⅠ4+5\3	11	29.71	1.35	50.96	40	1514	97.4192	dDLijK8072	0	1	0	0	0	9.06	300	1000.3	1001.6	1000.95	1.1	0.4	21.1	0.033	45	84.7	13	1	0	0	0	0	0	0.0304096	1.1479	97.4192
dDLijK8072	2020-10-24	202110	GⅠ4+5\2-GⅠ4+5\3	12	31	1.32	50.8	41	1575	97.4674	dDLijK8072	0	1	0	0	0	9.06	300	1000.3	1001.6	1000.95	1.1	0.4	21.1	0.033	45	84.7	13	1	0	0	0	0	0	0.0297338	1.1443	97.4674
dDLijK8072	2020-10-24	202011	GⅠ8-GⅠ9	1	25.73	1.51	69.71	39	1794	97.8798	dDLijK8072	0	1	0	0	0	9.06	300	1008.3	1013.7	1011	2.6	1	24.4	0.047	38	97.02	15	1	0	0	0	0	0	0.121109	5.59108	97.8798
dDLijK8072	2020-10-24	202012	GⅠ8-GⅠ9	2	30.98	3.49	76.27	108	2363	95.6244	dDLijK8072	0	1	0	0	0	9.06	300	1008.3	1013.7	1011	2.6	1	24.4	0.047	38	97.02	15	1	0	0	0	0	0	0.279915	6.11722	95.6244
dDLijK8072	2020-10-24	202101	GⅠ8-GⅠ9	3	30.96	2.77	60.05	86	1859	95.5906	dDLijK8072	0	1	0	0	0	9.06	300	1008.3	1013.7	1011	2.6	1	24.4	0.047	38	97.02	15	1	0	0	0	0	0	0.222167	4.8163	95.5906
dDLijK8072	2020-10-24	202102	GⅠ8-GⅠ9	4	28	2.81	47.92	79	1342	94.4609	dDLijK8072	0	1	0	0	0	9.06	300	1008.3	1013.7	1011	2.6	1	24.4	0.047	38	97.02	15	1	0	0	0	0	0	0.225375	3.84341	94.4609
dDLijK8072	2020-10-24	202103	GⅠ8-GⅠ9	5	31	2.69	47.56	83	1474	94.6468	dDLijK8072	0	1	0	0	0	9.06	300	1008.3	1013.7	1011	2.6	1	24.4	0.047	38	97.02	15	1	0	0	0	0	0	0.215751	3.81454	94.6468
dDLijK8072	2020-10-24	202104	GⅠ8-GⅠ9	6	27	2.73	48.21	74	1302	94.6408	dDLijK8072	0	1	0	0	0	9.06	300	1008.3	1013.7	1011	2.6	1	24.4	0.047	38	97.02	15	1	0	0	0	0	0	0.218959	3.86667	94.6408
dDLijK8072	2020-10-24	202105	GⅠ8-GⅠ9	7	30.92	2.02	49.56	62	1532	96.0838	dDLijK8072	0	1	0	0	0	9.06	300	1008.3	1013.7	1011	2.6	1	24.4	0.047	38	97.02	15	1	0	0	0	0	0	0.162014	3.97495	96.0838
dDLijK8072	2020-10-24	202106	GⅠ8-GⅠ9	8	29.63	1.97	49.92	58	1479	96.2035	dDLijK8072	0	1	0	0	0	9.06	300	1008.3	1013.7	1011	2.6	1	24.4	0.047	38	97.02	15	1	0	0	0	0	0	0.158003	4.00382	96.2035
dDLijK8072	2020-10-24	202107	GⅠ8-GⅠ9	9	30.31	1.66	50.29	50	1524	96.8046	dDLijK8072	0	1	0	0	0	9.06	300	1008.3	1013.7	1011	2.6	1	24.4	0.047	38	97.02	15	1	0	0	0	0	0	0.13314	4.0335	96.8046
dDLijK8072	2020-10-24	202108	GⅠ8-GⅠ9	10	30.79	1.02	51.22	31	1577	98.0475	dDLijK8072	0	1	0	0	0	9.06	300	1008.3	1013.7	1011	2.6	1	24.4	0.047	38	97.02	15	1	0	0	0	0	0	0.0818089	4.10809	98.0475
dDLijK8072	2020-10-24	202109	GⅠ8-GⅠ9	11	29.71	1.35	50.96	40	1514	97.4192	dDLijK8072	0	1	0	0	0	9.06	300	1008.3	1013.7	1011	2.6	1	24.4	0.047	38	97.02	15	1	0	0	0	0	0	0.108276	4.08724	97.4192
dDLijK8072	2020-10-24	202110	GⅠ8-GⅠ9	12	31	1.32	50.8	41	1575	97.4674	dDLijK8072	0	1	0	0	0	9.06	300	1008.3	1013.7	1011	2.6	1	24.4	0.047	38	97.02	15	1	0	0	0	0	0	0.10587	4.0744	97.4674
WBHTPf7569	2020-11-20	202101	S3_2-3	1	30.98	3.62	53.59	112	1660	93.6724	WBHTPf7569	0	1	0	0	0	9.53	250	960	961.6	960.8	2.2	1.1	28.4	0.07	47	91.7	14	1	0.14471	0.832529	4.46636	25.8155	85.192	0.323364	4.78704	93.6724
WBHTPf7569	2020-11-20	202102	S3_2-3	2	27.98	4.31	42.31	121	1184	90.755	WBHTPf7569	0	1	0	0	0	9.53	250	960	961.6	960.8	2.2	1.1	28.4	0.07	47	91.7	14	1	0.14471	0.832529	4.46636	25.8155	85.192	0.385	3.77943	90.755
WBHTPf7569	2020-11-20	202103	S3_2-3	3	30.83	4.32	38.67	133	1192	89.9512	WBHTPf7569	0	1	0	0	0	9.53	250	960	961.6	960.8	2.2	1.1	28.4	0.07	47	91.7	14	1	0.14471	0.832529	4.46636	25.8155	85.192	0.385893	3.45428	89.9512
WBHTPf7569	2020-11-20	202104	S3_2-3	4	29.69	3.38	31.29	100	929	90.2509	WBHTPf7569	0	1	0	0	0	9.53	250	960	961.6	960.8	2.2	1.1	28.4	0.07	47	91.7	14	1	0.14471	0.832529	4.46636	25.8155	85.192	0.301926	2.79505	90.2509
WBHTPf7569	2020-11-20	202105	S3_2-3	5	31	3.05	28.4	95	880	90.3021	WBHTPf7569	0	1	0	0	0	9.53	250	960	961.6	960.8	2.2	1.1	28.4	0.07	47	91.7	14	1	0.14471	0.832529	4.46636	25.8155	85.192	0.272448	2.53689	90.3021
WBHTPf7569	2020-11-20	202106	S3_2-3	6	29.98	3.29	28.78	99	863	89.7412	WBHTPf7569	0	1	0	0	0	9.53	250	960	961.6	960.8	2.2	1.1	28.4	0.07	47	91.7	14	1	0.14471	0.832529	4.46636	25.8155	85.192	0.293886	2.57084	89.7412
WBHTPf7569	2020-11-20	202107	S3_2-3	7	30.98	3.39	26.38	105	817	88.6127	WBHTPf7569	0	1	0	0	0	9.53	250	960	961.6	960.8	2.2	1.1	28.4	0.07	47	91.7	14	1	0.14471	0.832529	4.46636	25.8155	85.192	0.302819	2.35645	88.6127
WBHTPf7569	2020-11-20	202108	S3_2-3	8	30.98	3.76	27.14	116	841	87.8317	WBHTPf7569	0	1	0	0	0	9.53	250	960	961.6	960.8	2.2	1.1	28.4	0.07	47	91.7	14	1	0.14471	0.832529	4.46636	25.8155	85.192	0.33587	2.42434	87.8317
WBHTPf7569	2020-11-20	202109	S3_2-3	9	29.75	4.89	29.98	145	892	85.9765	WBHTPf7569	0	1	0	0	0	9.53	250	960	961.6	960.8	2.2	1.1	28.4	0.07	47	91.7	14	1	0.14471	0.832529	4.46636	25.8155	85.192	0.43681	2.67803	85.9765
WBHTPf7569	2020-11-20	202110	S3_2-3	10	30.19	4.35	24.78	131	748	85.0669	WBHTPf7569	0	1	0	0	0	9.53	250	960	961.6	960.8	2.2	1.1	28.4	0.07	47	91.7	14	1	0.14471	0.832529	4.46636	25.8155	85.192	0.388573	2.21353	85.0669
WBHTPf7569	2020-11-20	202111	S3_2-3	11	30	3.41	23.21	102	696	87.1901	WBHTPf7569	0	1	0	0	0	9.53	250	960	961.6	960.8	2.2	1.1	28.4	0.07	47	91.7	14	1	0.14471	0.832529	4.46636	25.8155	85.192	0.304606	2.07328	87.1901
WBHTPf7569	2020-11-20	202101	S3_3-S3_4	1	30.98	3.62	53.59	112	1660	93.6724	WBHTPf7569	0	1	0	0	0	9.53	250	962.9	967.2	965.05	3.8	1.9	28.7	0.08	39	103.6	16	1	0.285661	1.64343	8.81671	50.9606	85.192	0.638329	9.44974	93.6724
WBHTPf7569	2020-11-20	202102	S3_3-S3_4	2	27.98	4.31	42.31	121	1184	90.755	WBHTPf7569	0	1	0	0	0	9.53	250	962.9	967.2	965.05	3.8	1.9	28.7	0.08	39	103.6	16	1	0.285661	1.64343	8.81671	50.9606	85.192	0.76	7.4607	90.755
WBHTPf7569	2020-11-20	202103	S3_3-S3_4	3	30.83	4.32	38.67	133	1192	89.9512	WBHTPf7569	0	1	0	0	0	9.53	250	962.9	967.2	965.05	3.8	1.9	28.7	0.08	39	103.6	16	1	0.285661	1.64343	8.81671	50.9606	85.192	0.761763	6.81884	89.9512
WBHTPf7569	2020-11-20	202104	S3_3-S3_4	4	29.69	3.38	31.29	100	929	90.2509	WBHTPf7569	0	1	0	0	0	9.53	250	962.9	967.2	965.05	3.8	1.9	28.7	0.08	39	103.6	16	1	0.285661	1.64343	8.81671	50.9606	85.192	0.596009	5.51749	90.2509
WBHTPf7569	2020-11-20	202105	S3_3-S3_4	5	31	3.05	28.4	95	880	90.3021	WBHTPf7569	0	1	0	0	0	9.53	250	962.9	967.2	965.05	3.8	1.9	28.7	0.08	39	103.6	16	1	0.285661	1.64343	8.81671	50.9606	85.192	0.537819	5.00789	90.3021
WBHTPf7569	2020-11-20	202106	S3_3-S3_4	6	29.98	3.29	28.78	99	863	89.7412	WBHTPf7569	0	1	0	0	0	9.53	250	962.9	967.2	965.05	3.8	1.9	28.7	0.08	39	103.6	16	1	0.285661	1.64343	8.81671	50.9606	85.192	0.580139	5.0749	89.7412
WBHTPf7569	2020-11-20	202107	S3_3-S3_4	7	30.98	3.39	26.38	105	817	88.6127	WBHTPf7569	0	1	0	0	0	9.53	250	962.9	967.2	965.05	3.8	1.9	28.7	0.08	39	103.6	16	1	0.285661	1.64343	8.81671	50.9606	85.192	0.597773	4.65169	88.6127
WBHTPf7569	2020-11-20	202108	S3_3-S3_4	8	30.98	3.76	27.14	116	841	87.8317	WBHTPf7569	0	1	0	0	0	9.53	250	962.9	967.2	965.05	3.8	1.9	28.7	0.08	39	103.6	16	1	0.285661	1.64343	8.81671	50.9606	85.192	0.663016	4.78571	87.8317
WBHTPf7569	2020-11-20	202109	S3_3-S3_4	9	29.75	4.89	29.98	145	892	85.9765	WBHTPf7569	0	1	0	0	0	9.53	250	962.9	967.2	965.05	3.8	1.9	28.7	0.08	39	103.6	16	1	0.285661	1.64343	8.81671	50.9606	85.192	0.862274	5.2865	85.9765
[truncated: 2,105 more rows]
