# Supplementary material for: Data-driven intelligent productivity prediction model for horizontal fracture stimulation
Source: Frontiers journal article supplement (doi:10.3389/feart.2025.1601363), 2025-08-01
Supplement: Table_8.xlsx [file Table_8.xlsx]

## Sheet: 01
Post-fracture duration(mon)	Clustering results	present fomraiton pressure(MPa)	well spacing(m)	depth at the top(m)	oil bed depth(m)	Depth of the central part of the oil layer(m)	Effective thickness(m)	Porosity(%)	permeability(μm)	Breakdown pressure(MPa)	Total liquid volume(m^3)	quantity of sand added(m^3)	Number of fracture slits (slits)	Daily oil production from small layer before fracturing (t)	Daily water production from small layer before fracturing (t)	pre-fracture water content(%)	Daily oil production from small layers after fracturing(t)	Production capacity splitting factor(1)	Daily oil increase(t)
1	13.75	150	1143.4	1145.8	1144.6	2.4	1.5	27.5	0.456	21	56.64	9	1	0.44244	2.12888	82.7933	0.528629	0.287298	0.0861895
1	13.75	150	1151	1151.9	1151.45	0.9	0.6	28.3	0.419	31	109.44	18	1	0.162616	0.782457	82.7933	0.194294	0.105595	0.0316784
1	9.36	175	972.1	975.9	974	2.8	0.3	30.6	0.106	26	320	45	1	0.0272281	0.401539	93.6497	0.0688182	0.0149605	0.0415901
2	9.36	175	972.1	975.9	974	2.8	0.3	30.6	0.106	26	320	45	1	0.0272281	0.401539	93.6497	0.0688182	0.0149605	0.0415901
3	9.36	175	972.1	975.9	974	2.8	0.3	30.6	0.106	26	320	45	1	0.0272281	0.401539	93.6497	0.0279761	0.0149605	0.000748024
4	9.36	175	972.1	975.9	974	2.8	0.3	30.6	0.106	26	320	45	1	0.0272281	0.401539	93.6497	0.0279761	0.0149605	0.000748024
1	9.4	175	969.1	970.8	969.95	1.7	0.5	31.4	0.81	36	245	34	1	0.0474988	2.42438	98.0784	0.260759	0.0969363	0.21326
2	9.4	175	969.1	970.8	969.95	1.7	0.5	31.4	0.81	36	245	34	1	0.0474988	2.42438	98.0784	0.343155	0.0969363	0.295656
3	9.4	175	969.1	970.8	969.95	1.7	0.5	31.4	0.81	36	245	34	1	0.0474988	2.42438	98.0784	0.328614	0.0969363	0.281115
4	9.4	175	969.1	970.8	969.95	1.7	0.5	31.4	0.81	36	245	34	1	0.0474988	2.42438	98.0784	0.386776	0.0969363	0.339277
5	9.4	175	969.1	970.8	969.95	1.7	0.5	31.4	0.81	36	245	34	1	0.0474988	2.42438	98.0784	0.421673	0.0969363	0.374174
6	9.4	175	969.1	970.8	969.95	1.7	0.5	31.4	0.81	36	245	34	1	0.0474988	2.42438	98.0784	0.403255	0.0969363	0.355756
1	9.4	175	977.4	981	979.2	3.6	3.1	32.6	1.21	27	320	45	1	0.439921	22.4539	98.0784	2.41508	0.897798	1.97516
2	9.4	175	977.4	981	979.2	3.6	3.1	32.6	1.21	27	320	45	1	0.439921	22.4539	98.0784	3.1782	0.897798	2.73828
3	9.4	175	977.4	981	979.2	3.6	3.1	32.6	1.21	27	320	45	1	0.439921	22.4539	98.0784	3.04354	0.897798	2.60361
4	9.4	175	977.4	981	979.2	3.6	3.1	32.6	1.21	27	320	45	1	0.439921	22.4539	98.0784	3.58221	0.897798	3.14229
5	9.4	175	977.4	981	979.2	3.6	3.1	32.6	1.21	27	320	45	1	0.439921	22.4539	98.0784	3.90542	0.897798	3.4655
6	9.4	175	977.4	981	979.2	3.6	3.1	32.6	1.21	27	320	45	1	0.439921	22.4539	98.0784	3.73484	0.897798	3.29492
1	7.18	175	963.4	967.4	965.4	4	3.1	30	0.926	23	73.68	12	1	0.741771	10.7515	93.5461	1.44494	0.275751	0.703166
2	7.18	175	963.4	967.4	965.4	4	3.1	30	0.926	23	73.68	12	1	0.741771	10.7515	93.5461	1.27949	0.275751	0.537715
3	7.18	175	963.4	967.4	965.4	4	3.1	30	0.926	23	73.68	12	1	0.741771	10.7515	93.5461	1.34015	0.275751	0.598381
4	7.18	175	963.4	967.4	965.4	4	3.1	30	0.926	23	73.68	12	1	0.741771	10.7515	93.5461	1.20503	0.275751	0.463262
5	7.18	175	963.4	967.4	965.4	4	3.1	30	0.926	23	73.68	12	1	0.741771	10.7515	93.5461	1.27673	0.275751	0.534958
6	7.18	175	963.4	967.4	965.4	4	3.1	30	0.926	23	73.68	12	1	0.741771	10.7515	93.5461	1.69311	0.275751	0.951342
1	11.45	150	1088.3	1092.1	1090.2	3.8	2.9	27.3	0.451	20	78.92	12	1	0.263876	9.11031	97.1851	0.613511	0.659689	0.349635
2	11.45	150	1088.3	1092.1	1090.2	3.8	2.9	27.3	0.451	20	78.92	12	1	0.263876	9.11031	97.1851	0.613511	0.659689	0.349635
3	11.45	150	1088.3	1092.1	1090.2	3.8	2.9	27.3	0.451	20	78.92	12	1	0.263876	9.11031	97.1851	0.587123	0.659689	0.323248
4	11.45	150	1088.3	1092.1	1090.2	3.8	2.9	27.3	0.451	20	78.92	12	1	0.263876	9.11031	97.1851	0.587123	0.659689	0.323248
5	11.45	150	1088.3	1092.1	1090.2	3.8	2.9	27.3	0.451	20	78.92	12	1	0.263876	9.11031	97.1851	0.758643	0.659689	0.494767
6	11.45	150	1088.3	1092.1	1090.2	3.8	2.9	27.3	0.451	20	78.92	12	1	0.263876	9.11031	97.1851	0.758643	0.659689	0.494767
1	11.45	150	1088.3	1092.1	1090.2	3.8	2.9	27.3	0.451	20	78.92	12	1	0.263876	9.11031	97.1851	1.29299	0.659689	1.02912
2	11.45	150	1088.3	1092.1	1090.2	3.8	2.9	27.3	0.451	20	78.92	12	1	0.263876	9.11031	97.1851	0.646496	0.659689	0.38262
3	11.45	150	1088.3	1092.1	1090.2	3.8	2.9	27.3	0.451	20	78.92	12	1	0.263876	9.11031	97.1851	0.646496	0.659689	0.38262
4	11.45	150	1088.3	1092.1	1090.2	3.8	2.9	27.3	0.451	20	78.92	12	1	0.263876	9.11031	97.1851	1.15446	0.659689	0.890581
5	11.45	150	1088.3	1092.1	1090.2	3.8	2.9	27.3	0.451	20	78.92	12	1	0.263876	9.11031	97.1851	1.15446	0.659689	0.890581
6	11.45	150	1088.3	1092.1	1090.2	3.8	2.9	27.3	0.451	20	78.92	12	1	0.263876	9.11031	97.1851	1.13467	0.659689	0.87079
1	11.45	150	1111.3	1112.6	1111.95	1.3	1.3	28.2	0.519	43	144.24	24	1	0.136124	4.69969	97.1851	0.316489	0.340311	0.180365
2	11.45	150	1111.3	1112.6	1111.95	1.3	1.3	28.2	0.519	43	144.24	24	1	0.136124	4.69969	97.1851	0.316489	0.340311	0.180365
3	11.45	150	1111.3	1112.6	1111.95	1.3	1.3	28.2	0.519	43	144.24	24	1	0.136124	4.69969	97.1851	0.302877	0.340311	0.166752
4	11.45	150	1111.3	1112.6	1111.95	1.3	1.3	28.2	0.519	43	144.24	24	1	0.136124	4.69969	97.1851	0.302877	0.340311	0.166752
5	11.45	150	1111.3	1112.6	1111.95	1.3	1.3	28.2	0.519	43	144.24	24	1	0.136124	4.69969	97.1851	0.391357	0.340311	0.255233
6	11.45	150	1111.3	1112.6	1111.95	1.3	1.3	28.2	0.519	43	144.24	24	1	0.136124	4.69969	97.1851	0.391357	0.340311	0.255233
1	11.45	150	1111.3	1112.6	1111.95	1.3	1.3	28.2	0.519	43	144.24	24	1	0.136124	4.69969	97.1851	0.667009	0.340311	0.530885
2	11.45	150	1111.3	1112.6	1111.95	1.3	1.3	28.2	0.519	43	144.24	24	1	0.136124	4.69969	97.1851	0.333504	0.340311	0.19738
3	11.45	150	1111.3	1112.6	1111.95	1.3	1.3	28.2	0.519	43	144.24	24	1	0.136124	4.69969	97.1851	0.333504	0.340311	0.19738
4	11.45	150	1111.3	1112.6	1111.95	1.3	1.3	28.2	0.519	43	144.24	24	1	0.136124	4.69969	97.1851	0.595544	0.340311	0.459419
5	11.45	150	1111.3	1112.6	1111.95	1.3	1.3	28.2	0.519	43	144.24	24	1	0.136124	4.69969	97.1851	0.595544	0.340311	0.459419
6	11.45	150	1111.3	1112.6	1111.95	1.3	1.3	28.2	0.519	43	144.24	24	1	0.136124	4.69969	97.1851	0.585334	0.340311	0.44921
1	9.4	150	979.8	982.9	981.35	3.2	1.1	28	0.134	17	148.52	24	1	0.0206054	0.706132	97.1647	0.0887618	0.0396258	0.0681564
2	9.4	150	979.8	982.9	981.35	3.2	1.1	28	0.134	17	148.52	24	1	0.0206054	0.706132	97.1647	0.0542873	0.0396258	0.0336819
3	9.4	150	979.8	982.9	981.35	3.2	1.1	28	0.134	17	148.52	24	1	0.0816291	0.961718	92.1762	0.0907431	0.0396258	0.00911393
4	9.4	150	979.8	982.9	981.35	3.2	1.1	28	0.134	17	148.52	24	1	0.0206054	0.706132	97.1647	0.127991	0.0396258	0.107386
1	9.4	150	995.4	1001.1	998.25	5.7	5.2	31.6	0.687	16	55.92	9	1	0.499395	17.1139	97.1647	2.15124	0.960374	1.65184
2	9.4	150	995.4	1001.1	998.25	5.7	5.2	31.6	0.687	16	55.92	9	1	0.499395	17.1139	97.1647	1.31571	0.960374	0.816318
3	9.4	150	995.4	1001.1	998.25	5.7	5.2	31.6	0.687	16	55.92	9	1	1.97837	23.3083	92.1762	2.19926	0.960374	0.220886
4	9.4	150	995.4	1001.1	998.25	5.7	5.2	31.6	0.687	16	55.92	9	1	0.499395	17.1139	97.1647	3.10201	0.960374	2.60261
1	9.4	150	960.6	962.8	961.7	1.2	0.3	26	0.113	21	143.52	24	1	0.0121155	0.699901	98.2984	0.0335505	0.0465979	0.0214351
2	9.4	150	960.6	962.8	961.7	1.2	0.3	26	0.113	21	143.52	24	1	0.0121155	0.699901	98.2984	0.0521897	0.0465979	0.0400742
3	9.4	150	960.6	962.8	961.7	1.2	0.3	26	0.113	21	143.52	24	1	0.0121155	0.699901	98.2984	0.0591794	0.0465979	0.0470639
4	9.4	150	960.6	962.8	961.7	1.2	0.3	26	0.113	21	143.52	24	1	0.0121155	0.699901	98.2984	0.0531216	0.0465979	0.0410062
1	9.4	150	964.6	967.3	965.95	2	0.8	28.4	0.327	20	143.52	24	1	0.0934928	5.40101	98.2984	0.258903	0.359588	0.16541
2	9.4	150	964.6	967.3	965.95	2	0.8	28.4	0.327	20	143.52	24	1	0.0934928	5.40101	98.2984	0.402738	0.359588	0.309245
3	9.4	150	964.6	967.3	965.95	2	0.8	28.4	0.327	20	143.52	24	1	0.0934928	5.40101	98.2984	0.456676	0.359588	0.363184
4	9.4	150	964.6	967.3	965.95	2	0.8	28.4	0.327	20	143.52	24	1	0.0934928	5.40101	98.2984	0.40993	0.359588	0.316437
1	9.4	150	969	970.2	969.6	1.2	0.9	29.5	0.48	18	143.52	24	1	0.154392	8.91909	98.2984	0.427546	0.593814	0.273155
2	9.4	150	969	970.2	969.6	1.2	0.9	29.5	0.48	18	143.52	24	1	0.154392	8.91909	98.2984	0.665072	0.593814	0.51068
3	9.4	150	969	970.2	969.6	1.2	0.9	29.5	0.48	18	143.52	24	1	0.154392	8.91909	98.2984	0.754144	0.593814	0.599753
4	9.4	150	969	970.2	969.6	1.2	0.9	29.5	0.48	18	143.52	24	1	0.154392	8.91909	98.2984	0.676948	0.593814	0.522557
1	11.61	175	933.9	937.5	935.7	3.6	2.2	29.6	0.491	22	70	12	1	0.293367	1.39131	82.5862	0.528641	0.0580924	0.235274
2	11.61	175	933.9	937.5	935.7	3.6	2.2	29.6	0.491	22	70	12	1	0.293367	1.39131	82.5862	0.328803	0.0580924	0.0354364
3	11.61	175	933.9	937.5	935.7	3.6	2.2	29.6	0.491	22	70	12	1	0.293367	1.39131	82.5862	0.387477	0.0580924	0.0941098
4	11.61	175	933.9	937.5	935.7	3.6	2.2	29.6	0.491	22	70	12	1	0.293367	1.39131	82.5862	0.414199	0.0580924	0.120832
5	11.61	175	933.9	937.5	935.7	3.6	2.2	29.6	0.491	22	70	12	1	0.293367	1.39131	82.5862	0.479263	0.0580924	0.185896
6	11.61	175	933.9	937.5	935.7	3.6	2.2	29.6	0.491	22	70	12	1	0.293367	1.39131	82.5862	0.351459	0.0580924	0.0580924
1	11.61	175	939.6	942.6	941.1	3	2.5	29.4	1.016	23	70	12	1	0.689828	3.27156	82.5862	1.24306	0.1366	0.553228
2	11.61	175	939.6	942.6	941.1	3	2.5	29.4	1.016	23	70	12	1	0.689828	3.27156	82.5862	0.773153	0.1366	0.0833257
3	11.61	175	939.6	942.6	941.1	3	2.5	29.4	1.016	23	70	12	1	0.689828	3.27156	82.5862	0.911119	0.1366	0.221291
4	11.61	175	939.6	942.6	941.1	3	2.5	29.4	1.016	23	70	12	1	0.689828	3.27156	82.5862	0.973955	0.1366	0.284127
5	11.61	175	939.6	942.6	941.1	3	2.5	29.4	1.016	23	70	12	1	0.689828	3.27156	82.5862	1.12695	0.1366	0.437119
6	11.61	175	939.6	942.6	941.1	3	2.5	29.4	1.016	23	70	12	1	0.689828	3.27156	82.5862	0.826427	0.1366	0.1366
1	11.61	175	944.3	946.2	945.25	1.9	1.1	27.2	0.078	20	80	14	1	0.0233021	0.110512	82.5862	0.0419898	0.00461427	0.0186878
2	11.61	175	944.3	946.2	945.25	1.9	1.1	27.2	0.078	20	80	14	1	0.0233021	0.110512	82.5862	0.0261168	0.00461427	0.0028147
3	11.61	175	944.3	946.2	945.25	1.9	1.1	27.2	0.078	20	80	14	1	0.0233021	0.110512	82.5862	0.0307772	0.00461427	0.00747511
4	11.61	175	944.3	946.2	945.25	1.9	1.1	27.2	0.078	20	80	14	1	0.0233021	0.110512	82.5862	0.0328997	0.00461427	0.00959768
5	11.61	175	944.3	946.2	945.25	1.9	1.1	27.2	0.078	20	80	14	1	0.0233021	0.110512	82.5862	0.0380677	0.00461427	0.0147657
6	11.61	175	944.3	946.2	945.25	1.9	1.1	27.2	0.078	20	80	14	1	0.0233021	0.110512	82.5862	0.0279163	0.00461427	0.00461427
1	9.41	150	989.2	993.2	991.2	4	1.7	31.1	0.676	25	143.76	24	1	0.213947	7.32921	97.1637	1.97442	0.611277	1.76048
2	9.41	150	989.2	993.2	991.2	4	1.7	31.1	0.676	25	143.76	24	1	0.213947	7.32921	97.1637	2.79965	0.611277	2.5857
3	9.41	150	989.2	993.2	991.2	4	1.7	31.1	0.676	25	143.76	24	1	0.213947	7.32921	97.1637	2.49401	0.611277	2.28006
4	9.41	150	989.2	993.2	991.2	4	1.7	31.1	0.676	25	143.76	24	1	0.213947	7.32921	97.1637	2.33508	0.611277	2.12113
5	9.41	150	989.2	993.2	991.2	4	1.7	31.1	0.676	25	143.76	24	1	0.213947	7.32921	97.1637	2.44511	0.611277	2.23116
6	9.41	150	989.2	993.2	991.2	4	1.7	31.1	0.676	25	143.76	24	1	0.213947	7.32921	97.1637	1.68101	0.611277	1.46706
1	11.33	150	1092.8	1097.2	1095	4.4	4.1	28.2	0.461	27	56.4	9	1	0.382224	14.4099	97.416	1.40467	0.955561	1.02245
2	11.33	150	1092.8	1097.2	1095	4.4	4.1	28.2	0.461	27	56.4	9	1	0.382224	14.4099	97.416	2.26468	0.955561	1.88246
3	11.33	150	1092.8	1097.2	1095	4.4	4.1	28.2	0.461	27	56.4	9	1	0.382224	14.4099	97.416	2.43668	0.955561	2.05446
4	11.33	150	1092.8	1097.2	1095	4.4	4.1	28.2	0.461	27	56.4	9	1	0.382224	14.4099	97.416	2.84757	0.955561	2.46535
5	11.33	150	1092.8	1097.2	1095	4.4	4.1	28.2	0.461	27	56.4	9	1	0.382224	14.4099	97.416	3.13424	0.955561	2.75202
6	11.33	150	1092.8	1097.2	1095	4.4	4.1	28.2	0.461	27	56.4	9	1	0.382224	14.4099	97.416	2.91446	0.955561	2.53224
1	11.33	150	1110.1	1113	1111.55	1	0.3	26.6	0.251	22	138.72	23	1	0.0152275	0.574077	97.416	0.0559611	0.0380688	0.0407336
2	11.33	150	1110.1	1113	1111.55	1	0.3	26.6	0.251	22	138.72	23	1	0.0152275	0.574077	97.416	0.090223	0.0380688	0.0749954
3	11.33	150	1110.1	1113	1111.55	1	0.3	26.6	0.251	22	138.72	23	1	0.0152275	0.574077	97.416	0.0970753	0.0380688	0.0818478
4	11.33	150	1110.1	1113	1111.55	1	0.3	26.6	0.251	22	138.72	23	1	0.0152275	0.574077	97.416	0.113445	0.0380688	0.0982174
5	11.33	150	1110.1	1113	1111.55	1	0.3	26.6	0.251	22	138.72	23	1	0.0152275	0.574077	97.416	0.124866	0.0380688	0.109638
6	11.33	150	1110.1	1113	1111.55	1	0.3	26.6	0.251	22	138.72	23	1	0.0152275	0.574077	97.416	0.11611	0.0380688	0.100882
1	11.33	150	1115.4	1117.7	1116.55	0.8	0.2	25.2	0.063	27	168.24	24	1	0.00254803	0.0960607	97.416	0.009364	0.00637007	0.00681598
2	11.33	150	1115.4	1117.7	1116.55	0.8	0.2	25.2	0.063	27	168.24	24	1	0.00254803	0.0960607	97.416	0.0150971	0.00637007	0.012549
3	11.33	150	1115.4	1117.7	1116.55	0.8	0.2	25.2	0.063	27	168.24	24	1	0.00254803	0.0960607	97.416	0.0162437	0.00637007	0.0136957
4	11.33	150	1115.4	1117.7	1116.55	0.8	0.2	25.2	0.063	27	168.24	24	1	0.00254803	0.0960607	97.416	0.0189828	0.00637007	0.0164348
5	11.33	150	1115.4	1117.7	1116.55	0.8	0.2	25.2	0.063	27	168.24	24	1	0.00254803	0.0960607	97.416	0.0208938	0.00637007	0.0183458
6	11.33	150	1115.4	1117.7	1116.55	0.8	0.2	25.2	0.063	27	168.24	24	1	0.00254803	0.0960607	97.416	0.0194287	0.00637007	0.0168807
1	11.65	175	990.1	992.8	991.45	2.7	2.1	31.3	2.26	26	120	15	1	0.273761	2.96249	91.5408	0.682447	0.195544	0.408686
2	11.65	175	990.1	992.8	991.45	2.7	2.1	31.3	2.26	26	120	15	1	0.273761	2.96249	91.5408	0.533834	0.195544	0.260073
3	11.65	175	990.1	992.8	991.45	2.7	2.1	31.3	2.26	26	120	15	1	0.549478	5.91128	91.4952	0.647249	0.195544	0.0977718
4	11.65	175	990.1	992.8	991.45	2.7	2.1	31.3	2.26	26	120	15	1	0.273761	2.96249	91.5408	0.641383	0.195544	0.367622
1	11.65	175	1010.7	1021.1	1015.9	10.4	9.2	29.6	1.142	23	100	15	1	0.606035	6.55817	91.5408	1.51076	0.432882	0.904724
2	11.65	175	1010.7	1021.1	1015.9	10.4	9.2	29.6	1.142	23	100	15	1	0.606035	6.55817	91.5408	1.18177	0.432882	0.575733
3	11.65	175	1010.7	1021.1	1015.9	10.4	9.2	29.6	1.142	23	100	15	1	1.2164	13.086	91.4952	1.43284	0.432882	0.216441
4	11.65	175	1010.7	1021.1	1015.9	10.4	9.2	29.6	1.142	23	100	15	1	0.606035	6.55817	91.5408	1.41985	0.432882	0.813819
1	9.64	150	952.2	954.1	953.15	1.9	1.8	30.4	0.639	26	90.96	15	1	0.106634	3.71441	97.2093	0.197717	0.222154	0.091083
2	9.64	150	952.2	954.1	953.15	1.9	1.8	30.4	0.639	26	90.96	15	1	0.106634	3.71441	97.2093	0.135514	0.222154	0.02888
3	9.64	150	952.2	954.1	953.15	1.9	1.8	30.4	0.639	26	90.96	15	1	0.106634	3.71441	97.2093	0.168837	0.222154	0.062203
4	9.64	150	952.2	954.1	953.15	1.9	1.8	30.4	0.639	26	90.96	15	1	0.106634	3.71441	97.2093	0.21771	0.222154	0.111077
5	9.64	150	952.2	954.1	953.15	1.9	1.8	30.4	0.639	26	90.96	15	1	0.106634	3.71441	97.2093	0.277692	0.222154	0.171058
6	9.64	150	952.2	954.1	953.15	1.9	1.8	30.4	0.639	26	90.96	15	1	0.106634	3.71441	97.2093	0.255477	0.222154	0.148843
1	9.83	125	856.2	857.5	856.85	1.3	0.9	26.7	0.202	19	143.28	24	1	0.263287	2.24654	89.5098	0.431314	0.0661524	0.168027
2	9.83	125	856.2	857.5	856.85	1.3	0.9	26.7	0.202	19	143.28	24	1	0.263287	2.24654	89.5098	0.447852	0.0661524	0.184565
3	9.83	125	856.2	857.5	856.85	1.3	0.9	26.7	0.202	19	143.28	24	1	0.263287	2.24654	89.5098	0.430652	0.0661524	0.167366
4	9.83	125	856.2	857.5	856.85	1.3	0.9	26.7	0.202	19	143.28	24	1	0.263287	2.24654	89.5098	0.389638	0.0661524	0.126351
5	9.83	125	856.2	857.5	856.85	1.3	0.9	26.7	0.202	19	143.28	24	1	0.263287	2.24654	89.5098	0.289086	0.0661524	0.0257994
1	9.83	125	867.1	869.6	868.35	2.1	0.8	30.8	0.292	17	143.28	24	1	0.338304	2.88664	89.5098	0.554207	0.0850011	0.215903
2	9.83	125	867.1	869.6	868.35	2.1	0.8	30.8	0.292	17	143.28	24	1	0.338304	2.88664	89.5098	0.575457	0.0850011	0.237153
3	9.83	125	867.1	869.6	868.35	2.1	0.8	30.8	0.292	17	143.28	24	1	0.338304	2.88664	89.5098	0.553357	0.0850011	0.215053
4	9.83	125	867.1	869.6	868.35	2.1	0.8	30.8	0.292	17	143.28	24	1	0.338304	2.88664	89.5098	0.500656	0.0850011	0.162352
5	9.83	125	867.1	869.6	868.35	2.1	0.8	30.8	0.292	17	143.28	24	1	0.338304	2.88664	89.5098	0.371455	0.0850011	0.0331504
1	9.83	125	872.5	876.4	874.45	3.9	3	32.7	0.582	19	143.28	24	1	2.52859	21.5756	89.5098	4.14232	0.635325	1.61373
2	9.83	125	872.5	876.4	874.45	3.9	3	32.7	0.582	19	143.28	24	1	2.52859	21.5756	89.5098	4.30115	0.635325	1.77256
3	9.83	125	872.5	876.4	874.45	3.9	3	32.7	0.582	19	143.28	24	1	2.52859	21.5756	89.5098	4.13597	0.635325	1.60737
4	9.83	125	872.5	876.4	874.45	3.9	3	32.7	0.582	19	143.28	24	1	2.52859	21.5756	89.5098	3.74206	0.635325	1.21347
5	9.83	125	872.5	876.4	874.45	3.9	3	32.7	0.582	19	143.28	24	1	2.52859	21.5756	89.5098	2.77637	0.635325	0.247777
1	10	125	925.7	928.7	927.2	2.5	1.8	31.6	1.269	26	62.22	11	1	1.41237	3.19024	69.3137	2.75705	0.451236	1.34468
2	10	125	925.7	928.7	927.2	2.5	1.8	31.6	1.269	26	62.22	11	1	1.41237	3.19024	69.3137	2.75705	0.451236	1.34468
3	10	125	925.7	928.7	927.2	2.5	1.8	31.6	1.269	26	62.22	11	1	1.41237	3.19024	69.3137	2.72095	0.451236	1.30858
4	10	125	925.7	928.7	927.2	2.5	1.8	31.6	1.269	26	62.22	11	1	1.41237	3.19024	69.3137	2.72095	0.451236	1.30858
5	10	125	925.7	928.7	927.2	2.5	1.8	31.6	1.269	26	62.22	11	1	1.41237	3.19024	69.3137	3.34817	0.451236	1.9358
6	10	125	925.7	928.7	927.2	2.5	1.8	31.6	1.269	26	62.22	11	1	1.41237	3.19024	69.3137	3.34817	0.451236	1.9358
1	9.41	150	938	941.4	939.7	3.4	2.9	31.7	0.518	19	61.68	10	1	0.0117356	2.41754	99.5169	0.508544	0.391188	0.496808
2	9.41	150	938	941.4	939.7	3.4	2.9	31.7	0.518	19	61.68	10	1	0.0117356	2.41754	99.5169	0.524192	0.391188	0.512456
1	10.95	150	1061.5	1063.9	1062.7	2.4	1.7	28.1	0.375	23	73.68	12	1	0.0454092	2.56562	98.2609	1.10647	0.151364	1.06106
2	10.95	150	1061.5	1063.9	1062.7	2.4	1.7	28.1	0.375	23	73.68	12	1	0.0454092	2.56562	98.2609	1.5318	0.151364	1.4864
3	10.95	150	1061.5	1063.9	1062.7	2.4	1.7	28.1	0.375	23	73.68	12	1	0.0454092	2.56562	98.2609	1.54997	0.151364	1.50456
4	10.95	150	1061.5	1063.9	1062.7	2.4	1.7	28.1	0.375	23	73.68	12	1	0.0454092	2.56562	98.2609	1.81637	0.151364	1.77096
5	10.95	150	1061.5	1063.9	1062.7	2.4	1.7	28.1	0.375	23	73.68	12	1	0.0454092	2.56562	98.2609	1.87994	0.151364	1.83453
6	10.95	150	1061.5	1063.9	1062.7	2.4	1.7	28.1	0.375	23	73.68	12	1	0.0454092	2.56562	98.2609	2.01768	0.151364	1.97227
1	10.95	150	1075.2	1076	1075.6	0.8	0.4	26.2	0.128	26	73.68	12	1	0.00364698	0.206055	98.2609	0.0888648	0.0121566	0.0852178
2	10.95	150	1075.2	1076	1075.6	0.8	0.4	26.2	0.128	26	73.68	12	1	0.00364698	0.206055	98.2609	0.123025	0.0121566	0.119378
3	10.95	150	1075.2	1076	1075.6	0.8	0.4	26.2	0.128	26	73.68	12	1	0.00364698	0.206055	98.2609	0.124484	0.0121566	0.120837
4	10.95	150	1075.2	1076	1075.6	0.8	0.4	26.2	0.128	26	73.68	12	1	0.00364698	0.206055	98.2609	0.145879	0.0121566	0.142232
5	10.95	150	1075.2	1076	1075.6	0.8	0.4	26.2	0.128	26	73.68	12	1	0.00364698	0.206055	98.2609	0.150985	0.0121566	0.147338
6	10.95	150	1075.2	1076	1075.6	0.8	0.4	26.2	0.128	26	73.68	12	1	0.00364698	0.206055	98.2609	0.162048	0.0121566	0.158401
1	10.95	150	1079.1	1082.8	1080.95	2.9	2.3	28.3	0.415	19	62.16	10	1	0.0679892	3.84139	98.2609	1.65667	0.226631	1.58868
2	10.95	150	1079.1	1082.8	1080.95	2.9	2.3	28.3	0.415	19	62.16	10	1	0.0679892	3.84139	98.2609	2.2935	0.226631	2.22551
3	10.95	150	1079.1	1082.8	1080.95	2.9	2.3	28.3	0.415	19	62.16	10	1	0.0679892	3.84139	98.2609	2.3207	0.226631	2.25271
4	10.95	150	1079.1	1082.8	1080.95	2.9	2.3	28.3	0.415	19	62.16	10	1	0.0679892	3.84139	98.2609	2.71957	0.226631	2.65158
5	10.95	150	1079.1	1082.8	1080.95	2.9	2.3	28.3	0.415	19	62.16	10	1	0.0679892	3.84139	98.2609	2.81475	0.226631	2.74676
6	10.95	150	1079.1	1082.8	1080.95	2.9	2.3	28.3	0.415	19	62.16	10	1	0.0679892	3.84139	98.2609	3.02099	0.226631	2.953
1	9.4	125	918	921.4	919.7	2.3	0.9	30.3	0.327	17	55.92	9	1	0.111268	2.11507	95.0022	0.282525	0.0967551	0.171257
2	9.4	125	918	921.4	919.7	2.3	0.9	30.3	0.327	17	55.92	9	1	0.111268	2.11507	95.0022	0.18964	0.0967551	0.0783716
3	9.4	125	918	921.4	919.7	2.3	0.9	30.3	0.327	17	55.92	9	1	0.111268	2.11507	95.0022	0.164484	0.0967551	0.0532153
4	9.4	125	918	921.4	919.7	2.3	0.9	30.3	0.327	17	55.92	9	1	0.111268	2.11507	95.0022	0.135457	0.0967551	0.0241888
5	9.4	125	918	921.4	919.7	2.3	0.9	30.3	0.327	17	55.92	9	1	0.111268	2.11507	95.0022	0.177062	0.0967551	0.0657935
6	9.4	125	918	921.4	919.7	2.3	0.9	30.3	0.327	17	55.92	9	1	0.111268	2.11507	95.0022	0.337675	0.0967551	0.226407
1	9.41	150	923.9	926.5	925.2	2.2	1.2	29.6	0.306	20	120.24	20	1	0.156581	3.1119	95.2094	0.844378	0.115986	0.687797
2	9.41	150	923.9	926.5	925.2	2.2	1.2	29.6	0.306	20	120.24	20	1	0.156581	3.1119	95.2094	0.418709	0.115986	0.262128
3	9.41	150	923.9	926.5	925.2	2.2	1.2	29.6	0.306	20	120.24	20	1	0.156581	3.1119	95.2094	0.252849	0.115986	0.0962684
4	9.41	150	923.9	926.5	925.2	2.2	1.2	29.6	0.306	20	120.24	20	1	0.156581	3.1119	95.2094	0.292285	0.115986	0.135704
5	9.41	150	923.9	926.5	925.2	2.2	1.2	29.6	0.306	20	120.24	20	1	0.156581	3.1119	95.2094	0.225013	0.115986	0.0684317
6	9.41	150	923.9	926.5	925.2	2.2	1.2	29.6	0.306	20	120.24	20	1	0.156581	3.1119	95.2094	0.310842	0.115986	0.154261
1	11.77	150	1112.8	1114.7	1113.75	1.9	1.7	29.3	0.401	25	44.88	7	1	0.202165	4.3735	95.5817	0.483511	0.168471	0.281346
2	11.77	150	1112.8	1114.7	1113.75	1.9	1.7	29.3	0.401	25	44.88	7	1	0.202165	4.3735	95.5817	0.941751	0.168471	0.739587
3	11.77	150	1112.8	1114.7	1113.75	1.9	1.7	29.3	0.401	25	44.88	7	1	0.202165	4.3735	95.5817	0.911427	0.168471	0.709262
4	11.77	150	1112.8	1114.7	1113.75	1.9	1.7	29.3	0.401	25	44.88	7	1	0.202165	4.3735	95.5817	1.16076	0.168471	0.958599
5	11.77	150	1112.8	1114.7	1113.75	1.9	1.7	29.3	0.401	25	44.88	7	1	0.202165	4.3735	95.5817	1.4539	0.168471	1.25174
6	11.77	150	1112.8	1114.7	1113.75	1.9	1.7	29.3	0.401	25	44.88	7	1	0.202165	4.3735	95.5817	1.15571	0.168471	0.953544
1	11.61	175	992.1	994.9	993.5	2.8	0.2	27.5	0.109	24	90.96	15	1	0.00761572	0.0882822	92.0585	0.0118745	0.00250517	0.00425879
2	11.61	175	992.1	994.9	993.5	2.8	0.2	27.5	0.109	24	90.96	15	1	0.00761572	0.0882822	92.0585	0.0105217	0.00250517	0.002906
3	11.61	175	992.1	994.9	993.5	2.8	0.2	27.5	0.109	24	90.96	15	1	0.00761572	0.0882822	92.0585	0.0115238	0.00250517	0.00390807
4	11.61	175	992.1	994.9	993.5	2.8	0.2	27.5	0.109	24	90.96	15	1	0.00761572	0.0882822	92.0585	0.0194902	0.00250517	0.0118745
5	11.61	175	992.1	994.9	993.5	2.8	0.2	27.5	0.109	24	90.96	15	1	0.00761572	0.0882822	92.0585	0.0312896	0.00250517	0.0236739
6	11.61	175	992.1	994.9	993.5	2.8	0.2	27.5	0.109	24	90.96	15	1	0.00761572	0.0882822	92.0585	0.0340453	0.00250517	0.0264296
1	9.99	175	954	957.4	955.7	3.4	3.3	31.5	1.013	26	143.28	24	1	4.35214	39.5501	90.0867	5.57618	0.906697	1.22404
2	9.99	175	954	957.4	955.7	3.4	3.3	31.5	1.013	26	143.28	24	1	4.35214	39.5501	90.0867	5.04123	0.906697	0.689089
1	7.18	175	943.2	948.8	946	5.2	2.1	30.5	0.27	17	143.52	24	1	0.216982	0.625106	74.2329	0.224028	0.0293615	0.00704676
1	7.18	175	962.2	967	964.6	4.2	2.8	29.5	0.48	20	56.16	9	1	0.514327	1.48173	74.2329	0.53103	0.0695976	0.0167034
1	7.18	175	975.6	981.8	978.7	6.2	6	29.5	1.2	19	56.16	9	1	2.75532	7.93786	74.2329	2.8448	0.372844	0.0894827
1	10.79	175	1025.8	1029.8	1027.8	2.6	1.1	28.5	0.265	22	144.48	24	1	0.0492223	0.892366	94.7724	0.10481	0.0212165	0.0555873
2	10.79	175	1025.8	1029.8	1027.8	2.6	1.1	28.5	0.265	22	144.48	24	1	0.0492223	0.892366	94.7724	0.0804106	0.0212165	0.0311883
3	10.79	175	1025.8	1029.8	1027.8	2.6	1.1	28.5	0.265	22	144.48	24	1	0.0492223	0.892366	94.7724	0.0812592	0.0212165	0.0320369
4	10.79	175	1025.8	1029.8	1027.8	2.6	1.1	28.5	0.265	22	144.48	24	1	0.0492223	0.892366	94.7724	0.0672563	0.0212165	0.018034
5	10.79	175	1025.8	1029.8	1027.8	2.6	1.1	28.5	0.265	22	144.48	24	1	0.0492223	0.892366	94.7724	0.0568602	0.0212165	0.00763794
1	9.15	125	938.6	948.5	943.55	6.7	6.1	31.8	0.936	20	66.68	10	1	1.18472	6.11692	83.7746	4.51581	0.495698	3.33109
2	9.15	125	938.6	948.5	943.55	6.7	6.1	31.8	0.936	20	66.68	10	1	1.18472	6.11692	83.7746	4.51581	0.495698	3.33109
3	9.15	125	938.6	948.5	943.55	6.7	6.1	31.8	0.936	20	66.68	10	1	1.18472	6.11692	83.7746	4.7587	0.495698	3.57398
4	9.15	125	938.6	948.5	943.55	6.7	6.1	31.8	0.936	20	66.68	10	1	1.18472	6.11692	83.7746	4.7587	0.495698	3.57398
5	9.15	125	938.6	948.5	943.55	6.7	6.1	31.8	0.936	20	66.68	10	1	1.18472	6.11692	83.7746	4.74879	0.495698	3.56407
6	9.15	125	938.6	948.5	943.55	6.7	6.1	31.8	0.936	20	66.68	10	1	1.18472	6.11692	83.7746	4.74879	0.495698	3.56407
1	8.87	175	978	983.3	980.65	5.3	0.3	30.4	0.56	27	260	40	1	0.108571	2.03429	94.9333	0.498571	0.047619	0.39
2	8.87	175	978	983.3	980.65	5.3	0.3	30.4	0.56	27	260	40	1	0.108571	2.03429	94.9333	0.445714	0.047619	0.337143
3	8.87	175	978	983.3	980.65	5.3	0.3	30.4	0.56	27	260	40	1	0.108571	2.03429	94.9333	0.435238	0.047619	0.326667
4	8.87	175	978	983.3	980.65	5.3	0.3	30.4	0.56	27	260	40	1	0.108571	2.03429	94.9333	0.369048	0.047619	0.260476
5	8.87	175	978	983.3	980.65	5.3	0.3	30.4	0.56	27	260	40	1	0.108571	2.03429	94.9333	0.249524	0.047619	0.140952
6	8.87	175	978	983.3	980.65	5.3	0.3	30.4	0.56	27	260	40	1	0.108571	2.03429	94.9333	0.169048	0.047619	0.0604762
1	9.83	125	837.7	839.3	838.5	1.6	0.8	29.6	0.419	17	113.76	19	1	0.202661	3.21649	94.0728	0.282682	0.0869791	0.0800208
2	9.83	125	837.7	839.3	838.5	1.6	0.8	29.6	0.419	17	113.76	19	1	0.202661	3.21649	94.0728	0.211359	0.0869791	0.00869791
3	9.83	125	837.7	839.3	838.5	1.6	0.8	29.6	0.419	17	113.76	19	1	0.202661	3.21649	94.0728	0.277463	0.0869791	0.074802
4	9.83	125	837.7	839.3	838.5	1.6	0.8	29.6	0.419	17	113.76	19	1	0.202661	3.21649	94.0728	0.343567	0.0869791	0.140906
5	9.83	125	837.7	839.3	838.5	1.6	0.8	29.6	0.419	17	113.76	19	1	0.202661	3.21649	94.0728	0.337479	0.0869791	0.134818
6	9.83	125	837.7	839.3	838.5	1.6	0.8	29.6	0.419	17	113.76	19	1	0.202661	3.21649	94.0728	0.310515	0.0869791	0.107854
1	9.83	125	868.7	872.4	870.55	3.1	1.7	29.6	0.478	15	113.76	19	1	0.491296	7.79749	94.0728	0.685285	0.210857	0.193988
2	9.83	125	868.7	872.4	870.55	3.1	1.7	29.6	0.478	15	113.76	19	1	0.491296	7.79749	94.0728	0.512382	0.210857	0.0210857
3	9.83	125	868.7	872.4	870.55	3.1	1.7	29.6	0.478	15	113.76	19	1	0.491296	7.79749	94.0728	0.672633	0.210857	0.181337
4	9.83	125	868.7	872.4	870.55	3.1	1.7	29.6	0.478	15	113.76	19	1	0.491296	7.79749	94.0728	0.832884	0.210857	0.341588
5	9.83	125	868.7	872.4	870.55	3.1	1.7	29.6	0.478	15	113.76	19	1	0.491296	7.79749	94.0728	0.818124	0.210857	0.326828
6	9.83	125	868.7	872.4	870.55	3.1	1.7	29.6	0.478	15	113.76	19	1	0.491296	7.79749	94.0728	0.752759	0.210857	0.261462
1	9.83	125	875.3	876.8	876.05	1.5	1.2	30.5	0.488	16	113.76	19	1	0.354053	5.61926	94.0728	0.49385	0.151954	0.139798
2	9.83	125	875.3	876.8	876.05	1.5	1.2	30.5	0.488	16	113.76	19	1	0.354053	5.61926	94.0728	0.369248	0.151954	0.0151954
3	9.83	125	875.3	876.8	876.05	1.5	1.2	30.5	0.488	16	113.76	19	1	0.354053	5.61926	94.0728	0.484733	0.151954	0.13068
4	9.83	125	875.3	876.8	876.05	1.5	1.2	30.5	0.488	16	113.76	19	1	0.354053	5.61926	94.0728	0.600218	0.151954	0.246165
5	9.83	125	875.3	876.8	876.05	1.5	1.2	30.5	0.488	16	113.76	19	1	0.354053	5.61926	94.0728	0.589581	0.151954	0.235529
6	9.83	125	875.3	876.8	876.05	1.5	1.2	30.5	0.488	16	113.76	19	1	0.354053	5.61926	94.0728	0.542475	0.151954	0.188423
1	8.6	125	941.8	942.5	942.15	0.7	0.5	29.2	0.451	21	90.72	15	1	0.0596912	2.94808	98.0154	0.547169	0.110539	0.487478
2	8.6	125	941.8	942.5	942.15	0.7	0.5	29.2	0.451	21	90.72	15	1	0.0596912	2.94808	98.0154	0.427787	0.110539	0.368096
3	8.6	125	941.8	942.5	942.15	0.7	0.5	29.2	0.451	21	90.72	15	1	0.0596912	2.94808	98.0154	0.525061	0.110539	0.46537
4	8.6	125	941.8	942.5	942.15	0.7	0.5	29.2	0.451	21	90.72	15	1	0.0596912	2.94808	98.0154	0.467581	0.110539	0.40789
5	8.6	125	941.8	942.5	942.15	0.7	0.5	29.2	0.451	21	90.72	15	1	0.0596912	2.94808	98.0154	0.324985	0.110539	0.265294
6	8.6	125	941.8	942.5	942.15	0.7	0.5	29.2	0.451	21	90.72	15	1	0.0596912	2.94808	98.0154	0.217762	0.110539	0.158071
1	8.6	125	982.7	986.9	984.8	3.8	1.4	30.5	0.504	17	73.44	12	1	0.186776	9.22468	98.0154	1.71212	0.345882	1.52534
2	8.6	125	982.7	986.9	984.8	3.8	1.4	30.5	0.504	17	73.44	12	1	0.186776	9.22468	98.0154	1.33856	0.345882	1.15179
3	8.6	125	982.7	986.9	984.8	3.8	1.4	30.5	0.504	17	73.44	12	1	0.186776	9.22468	98.0154	1.64294	0.345882	1.45616
4	8.6	125	982.7	986.9	984.8	3.8	1.4	30.5	0.504	17	73.44	12	1	0.186776	9.22468	98.0154	1.46308	0.345882	1.27631
5	8.6	125	982.7	986.9	984.8	3.8	1.4	30.5	0.504	17	73.44	12	1	0.186776	9.22468	98.0154	1.01689	0.345882	0.830118
6	8.6	125	982.7	986.9	984.8	3.8	1.4	30.5	0.504	17	73.44	12	1	0.186776	9.22468	98.0154	0.681388	0.345882	0.494612
1	11.23	175	998.4	1000.2	999.3	1.8	1.6	32	0.712	26	58.16	8	1	0.540224	7.07566	92.9066	0.998596	0.181894	0.458372
2	11.23	175	998.4	1000.2	999.3	1.8	1.6	32	0.712	26	58.16	8	1	0.540224	7.07566	92.9066	0.80397	0.181894	0.263746
3	11.23	175	998.4	1000.2	999.3	1.8	1.6	32	0.712	26	58.16	8	1	0.540224	7.07566	92.9066	0.5475	0.181894	0.00727575
1	11.23	175	1001.6	1009.2	1005.4	6.7	5.4	30.8	0.616	28	56.16	9	1	1.57742	20.6605	92.9066	2.91584	0.531119	1.33842
2	11.23	175	1001.6	1009.2	1005.4	6.7	5.4	30.8	0.616	28	56.16	9	1	1.57742	20.6605	92.9066	2.34755	0.531119	0.770123
3	11.23	175	1001.6	1009.2	1005.4	6.7	5.4	30.8	0.616	28	56.16	9	1	1.57742	20.6605	92.9066	1.59867	0.531119	0.0212448
1	8.6	125	947.3	948.8	948.05	1.5	1	32.4	0.944	25	72.96	12	1	0.0133475	11.7591	99.8866	2.68952	0.667374	2.67617
2	8.6	125	947.3	948.8	948.05	1.5	1	32.4	0.944	25	72.96	12	1	0.0133475	11.7591	99.8866	2.20901	0.667374	2.19566
3	8.6	125	947.3	948.8	948.05	1.5	1	32.4	0.944	25	72.96	12	1	0.0133475	11.7591	99.8866	2.70954	0.667374	2.69619
4	8.6	125	947.3	948.8	948.05	1.5	1	32.4	0.944	25	72.96	12	1	0.0133475	11.7591	99.8866	2.86303	0.667374	2.84969
5	8.6	125	947.3	948.8	948.05	1.5	1	32.4	0.944	25	72.96	12	1	0.0133475	11.7591	99.8866	3.16335	0.667374	3.15
6	8.6	125	947.3	948.8	948.05	1.5	1	32.4	0.944	25	72.96	12	1	0.0133475	11.7591	99.8866	3.25011	0.667374	3.23676
1	10.21	175	1030.5	1033.4	1031.95	2.9	2.3	29.2	0.922	24	114.48	19	1	0.293566	3.56116	92.3843	0.760777	0.0959365	0.467211
2	10.21	175	1030.5	1033.4	1031.95	2.9	2.3	29.2	0.922	24	114.48	19	1	0.293566	3.56116	92.3843	0.526691	0.0959365	0.233126
3	10.21	175	1030.5	1033.4	1031.95	2.9	2.3	29.2	0.922	24	114.48	19	1	0.293566	3.56116	92.3843	0.495032	0.0959365	0.201467
4	10.21	175	1030.5	1033.4	1031.95	2.9	2.3	29.2	0.922	24	114.48	19	1	0.293566	3.56116	92.3843	0.584253	0.0959365	0.290688
5	10.21	175	1030.5	1033.4	1031.95	2.9	2.3	29.2	0.922	24	114.48	19	1	0.293566	3.56116	92.3843	0.572741	0.0959365	0.279175
6	10.21	175	1030.5	1033.4	1031.95	2.9	2.3	29.2	0.922	24	114.48	19	1	0.293566	3.56116	92.3843	0.520935	0.0959365	0.22737
1	10.21	175	1037	1040.4	1038.7	3.4	3	31.6	0.964	25	50.16	8	1	0.400355	4.85659	92.3843	1.03752	0.130835	0.637166
2	10.21	175	1037	1040.4	1038.7	3.4	3	31.6	0.964	25	50.16	8	1	0.400355	4.85659	92.3843	0.718283	0.130835	0.317929
3	10.21	175	1037	1040.4	1038.7	3.4	3	31.6	0.964	25	50.16	8	1	0.400355	4.85659	92.3843	0.675108	0.130835	0.274753
4	10.21	175	1037	1040.4	1038.7	3.4	3	31.6	0.964	25	50.16	8	1	0.400355	4.85659	92.3843	0.796784	0.130835	0.39643
5	10.21	175	1037	1040.4	1038.7	3.4	3	31.6	0.964	25	50.16	8	1	0.400355	4.85659	92.3843	0.781084	0.130835	0.380729
6	10.21	175	1037	1040.4	1038.7	3.4	3	31.6	0.964	25	50.16	8	1	0.400355	4.85659	92.3843	0.710433	0.130835	0.310079
1	10.95	150	972.7	974.7	973.7	2	1.3	30	0.362	35	114.48	19	1	1.8815	11.2665	85.6899	7.0575	0.374801	5.176
2	10.95	150	972.7	974.7	973.7	2	1.3	30	0.362	35	114.48	19	1	1.8815	11.2665	85.6899	5.09354	0.374801	3.21204
3	10.95	150	972.7	974.7	973.7	2	1.3	30	0.362	35	114.48	19	1	1.8815	11.2665	85.6899	4.83493	0.374801	2.95343
4	10.95	150	972.7	974.7	973.7	2	1.3	30	0.362	35	114.48	19	1	1.8815	11.2665	85.6899	5.62201	0.374801	3.74051
5	10.95	150	972.7	974.7	973.7	2	1.3	30	0.362	35	114.48	19	1	1.8815	11.2665	85.6899	3.22704	0.374801	1.34554
6	10.95	150	972.7	974.7	973.7	2	1.3	30	0.362	35	114.48	19	1	1.8815	11.2665	85.6899	1.91148	0.374801	0.0299841
1	10.95	150	994.2	996.7	995.45	2.5	2.5	29.4	0.314	18	118.8	12	1	3.1385	18.7935	85.6899	11.7725	0.625199	8.634
2	10.95	150	994.2	996.7	995.45	2.5	2.5	29.4	0.314	18	118.8	12	1	3.1385	18.7935	85.6899	8.49646	0.625199	5.35796
3	10.95	150	994.2	996.7	995.45	2.5	2.5	29.4	0.314	18	118.8	12	1	3.1385	18.7935	85.6899	8.06507	0.625199	4.92657
4	10.95	150	994.2	996.7	995.45	2.5	2.5	29.4	0.314	18	118.8	12	1	3.1385	18.7935	85.6899	9.37799	0.625199	6.23949
5	10.95	150	994.2	996.7	995.45	2.5	2.5	29.4	0.314	18	118.8	12	1	3.1385	18.7935	85.6899	5.38296	0.625199	2.24446
6	10.95	150	994.2	996.7	995.45	2.5	2.5	29.4	0.314	18	118.8	12	1	3.1385	18.7935	85.6899	3.18852	0.625199	0.0500159
1	11.54	150	1140.3	1144.1	1142.2	3.5	1.7	30.3	0.615	22	73.92	12	1	0.22	12.31	98.2442	1.34	1	1.12
2	11.54	150	1140.3	1144.1	1142.2	3.5	1.7	30.3	0.615	22	73.92	12	1	0.22	12.31	98.2442	1.4	1	1.18
3	11.54	150	1140.3	1144.1	1142.2	3.5	1.7	30.3	0.615	22	73.92	12	1	0.22	12.31	98.2442	1.18	1	0.96
4	11.54	150	1140.3	1144.1	1142.2	3.5	1.7	30.3	0.615	22	73.92	12	1	0.22	12.31	98.2442	1.27	1	1.05
5	11.54	150	1140.3	1144.1	1142.2	3.5	1.7	30.3	0.615	22	73.92	12	1	0.22	12.31	98.2442	0.82	1	0.6
6	11.54	150	1140.3	1144.1	1142.2	3.5	1.7	30.3	0.615	22	73.92	12	1	0.22	12.31	98.2442	0.55	1	0.33
1	10.13	150	978.5	980.2	979.35	1.7	1.1	29.4	0.338	32	91.2	15	1	0.0750264	2.39974	96.9683	0.188669	0.110333	0.113643
2	10.13	150	978.5	980.2	979.35	1.7	1.1	29.4	0.338	32	91.2	15	1	0.0750264	2.39974	96.9683	0.423679	0.110333	0.348652
3	10.13	150	978.5	980.2	979.35	1.7	1.1	29.4	0.338	32	91.2	15	1	0.0750264	2.39974	96.9683	0.622278	0.110333	0.547251
4	10.13	150	978.5	980.2	979.35	1.7	1.1	29.4	0.338	32	91.2	15	1	0.0750264	2.39974	96.9683	0.681858	0.110333	0.606831
5	10.13	150	978.5	980.2	979.35	1.7	1.1	29.4	0.338	32	91.2	15	1	0.0750264	2.39974	96.9683	0.471122	0.110333	0.396095
1	10.13	150	994.5	996.1	995.3	1.6	1.3	31.9	0.852	23	144	24	1	0.223505	7.14888	96.9683	0.56205	0.328684	0.338545
2	10.13	150	994.5	996.1	995.3	1.6	1.3	31.9	0.852	23	144	24	1	0.223505	7.14888	96.9683	1.26215	0.328684	1.03864
3	10.13	150	994.5	996.1	995.3	1.6	1.3	31.9	0.852	23	144	24	1	0.223505	7.14888	96.9683	1.85378	0.328684	1.63027
4	10.13	150	994.5	996.1	995.3	1.6	1.3	31.9	0.852	23	144	24	1	0.223505	7.14888	96.9683	2.03127	0.328684	1.80776
5	10.13	150	994.5	996.1	995.3	1.6	1.3	31.9	0.852	23	144	24	1	0.223505	7.14888	96.9683	1.40348	0.328684	1.17998
1	10.13	150	1056.2	1060.1	1058.15	3.9	2.6	29.4	0.527	20	55.92	9	1	0.175066	9.16554	98.1258	0.649437	0.564728	0.474372
2	10.13	150	1056.2	1060.1	1058.15	3.9	2.6	29.4	0.527	20	55.92	9	1	0.175066	9.16554	98.1258	1.79019	0.564728	1.61512
3	10.13	150	1056.2	1060.1	1058.15	3.9	2.6	29.4	0.527	20	55.92	9	1	0.175066	9.16554	98.1258	1.48524	0.564728	1.31017
4	10.13	150	1056.2	1060.1	1058.15	3.9	2.6	29.4	0.527	20	55.92	9	1	0.175066	9.16554	98.1258	1.94266	0.564728	1.7676
5	10.13	150	1056.2	1060.1	1058.15	3.9	2.6	29.4	0.527	20	55.92	9	1	0.175066	9.16554	98.1258	2.02737	0.564728	1.85231
6	10.13	150	1056.2	1060.1	1058.15	3.9	2.6	29.4	0.527	20	55.92	9	1	0.175066	9.16554	98.1258	1.19158	0.564728	1.01651
1	10.13	150	1063.4	1065.3	1064.35	1.9	0.4	25.8	0.089	21	114.96	19	1	0.00454849	0.238135	98.1258	0.0168734	0.0146725	0.0123249
2	10.13	150	1063.4	1065.3	1064.35	1.9	0.4	25.8	0.089	21	114.96	19	1	0.00454849	0.238135	98.1258	0.046512	0.0146725	0.0419635
3	10.13	150	1063.4	1065.3	1064.35	1.9	0.4	25.8	0.089	21	114.96	19	1	0.00454849	0.238135	98.1258	0.0385888	0.0146725	0.0340403
4	10.13	150	1063.4	1065.3	1064.35	1.9	0.4	25.8	0.089	21	114.96	19	1	0.00454849	0.238135	98.1258	0.0504736	0.0146725	0.0459251
5	10.13	150	1063.4	1065.3	1064.35	1.9	0.4	25.8	0.089	21	114.96	19	1	0.00454849	0.238135	98.1258	0.0526744	0.0146725	0.048126
6	10.13	150	1063.4	1065.3	1064.35	1.9	0.4	25.8	0.089	21	114.96	19	1	0.00454849	0.238135	98.1258	0.0309591	0.0146725	0.0264106
1	10.13	150	1066.7	1068.6	1067.65	1.9	1.5	30.5	0.579	21	114.96	19	1	0.110965	5.80957	98.1258	0.411645	0.357952	0.30068
2	10.13	150	1066.7	1068.6	1067.65	1.9	1.5	30.5	0.579	21	114.96	19	1	0.110965	5.80957	98.1258	1.13471	0.357952	1.02374
3	10.13	150	1066.7	1068.6	1067.65	1.9	1.5	30.5	0.579	21	114.96	19	1	0.110965	5.80957	98.1258	0.941415	0.357952	0.83045
4	10.13	150	1066.7	1068.6	1067.65	1.9	1.5	30.5	0.579	21	114.96	19	1	0.110965	5.80957	98.1258	1.23136	0.357952	1.12039
5	10.13	150	1066.7	1068.6	1067.65	1.9	1.5	30.5	0.579	21	114.96	19	1	0.110965	5.80957	98.1258	1.28505	0.357952	1.17408
6	10.13	150	1066.7	1068.6	1067.65	1.9	1.5	30.5	0.579	21	114.96	19	1	0.110965	5.80957	98.1258	0.75528	0.357952	0.644314
1	10.13	150	1079.7	1081	1080.35	1.3	0.8	29.4	0.19	24	91.44	15	1	0.0194205	1.01676	98.1258	0.0720439	0.0626468	0.0526233
2	10.13	150	1079.7	1081	1080.35	1.3	0.8	29.4	0.19	24	91.44	15	1	0.0194205	1.01676	98.1258	0.19859	0.0626468	0.17917
3	10.13	150	1079.7	1081	1080.35	1.3	0.8	29.4	0.19	24	91.44	15	1	0.0194205	1.01676	98.1258	0.164761	0.0626468	0.145341
4	10.13	150	1079.7	1081	1080.35	1.3	0.8	29.4	0.19	24	91.44	15	1	0.0194205	1.01676	98.1258	0.215505	0.0626468	0.196085
5	10.13	150	1079.7	1081	1080.35	1.3	0.8	29.4	0.19	24	91.44	15	1	0.0194205	1.01676	98.1258	0.224902	0.0626468	0.205482
6	10.13	150	1079.7	1081	1080.35	1.3	0.8	29.4	0.19	24	91.44	15	1	0.0194205	1.01676	98.1258	0.132185	0.0626468	0.112764
1	9.1	125	922.1	925.6	923.85	2	0.6	31.3	0.241	17	90.96	15	1	0.0742354	0.936427	92.6548	0.0912035	0.106051	0.0169681
2	9.1	125	922.1	925.6	923.85	2	0.6	31.3	0.241	17	90.96	15	1	0.0742354	0.936427	92.6548	0.159076	0.106051	0.0848405
3	9.1	125	922.1	925.6	923.85	2	0.6	31.3	0.241	17	90.96	15	1	0.0742354	0.936427	92.6548	0.20998	0.106051	0.135745
4	9.1	125	922.1	925.6	923.85	2	0.6	31.3	0.241	17	90.96	15	1	0.0742354	0.936427	92.6548	0.171802	0.106051	0.0975666
5	9.1	125	922.1	925.6	923.85	2	0.6	31.3	0.241	17	90.96	15	1	0.0742354	0.936427	92.6548	0.176044	0.106051	0.101809
6	9.1	125	922.1	925.6	923.85	2	0.6	31.3	0.241	17	90.96	15	1	0.0742354	0.936427	92.6548	0.267248	0.106051	0.193012
1	9.1	125	933.6	937.5	935.55	2.7	0.9	28.3	0.185	17	90.96	15	1	0.0854785	1.07825	92.6548	0.105017	0.122112	0.019538
2	9.1	125	933.6	937.5	935.55	2.7	0.9	28.3	0.185	17	90.96	15	1	0.0854785	1.07825	92.6548	0.183168	0.122112	0.0976898
3	9.1	125	933.6	937.5	935.55	2.7	0.9	28.3	0.185	17	90.96	15	1	0.0854785	1.07825	92.6548	0.241782	0.122112	0.156304
4	9.1	125	933.6	937.5	935.55	2.7	0.9	28.3	0.185	17	90.96	15	1	0.0854785	1.07825	92.6548	0.197822	0.122112	0.112343
5	9.1	125	933.6	937.5	935.55	2.7	0.9	28.3	0.185	17	90.96	15	1	0.0854785	1.07825	92.6548	0.202706	0.122112	0.117228
6	9.1	125	933.6	937.5	935.55	2.7	0.9	28.3	0.185	17	90.96	15	1	0.0854785	1.07825	92.6548	0.307723	0.122112	0.222244
1	9.1	125	954.6	960.1	957.35	4	1.1	31.8	0.3	15	91.2	15	1	0.169417	2.13707	92.6548	0.208141	0.242024	0.0387239
2	9.1	125	954.6	960.1	957.35	4	1.1	31.8	0.3	15	91.2	15	1	0.169417	2.13707	92.6548	0.363036	0.242024	0.193619
3	9.1	125	954.6	960.1	957.35	4	1.1	31.8	0.3	15	91.2	15	1	0.169417	2.13707	92.6548	0.479208	0.242024	0.309791
4	9.1	125	954.6	960.1	957.35	4	1.1	31.8	0.3	15	91.2	15	1	0.169417	2.13707	92.6548	0.392079	0.242024	0.222662
5	9.1	125	954.6	960.1	957.35	4	1.1	31.8	0.3	15	91.2	15	1	0.169417	2.13707	92.6548	0.40176	0.242024	0.232343
6	9.1	125	954.6	960.1	957.35	4	1.1	31.8	0.3	15	91.2	15	1	0.169417	2.13707	92.6548	0.609901	0.242024	0.440484
1	8.09	150	935.7	940.2	937.95	3.7	1.2	29.3	0.208	17	55.92	9	1	0.400521	10.2858	96.252	1.03323	0.580465	0.632707
2	8.09	150	935.7	940.2	937.95	3.7	1.2	29.3	0.208	17	55.92	9	1	0.400521	10.2858	96.252	1.79364	0.580465	1.39312
3	8.09	150	935.7	940.2	937.95	3.7	1.2	29.3	0.208	17	55.92	9	1	0.400521	10.2858	96.252	2.60048	0.580465	2.19996
4	8.09	150	935.7	940.2	937.95	3.7	1.2	29.3	0.208	17	55.92	9	1	0.400521	10.2858	96.252	2.28123	0.580465	1.88071
5	8.09	150	935.7	940.2	937.95	3.7	1.2	29.3	0.208	17	55.92	9	1	0.400521	10.2858	96.252	1.90393	0.580465	1.5034
6	8.09	150	935.7	940.2	937.95	3.7	1.2	29.3	0.208	17	55.92	9	1	0.400521	10.2858	96.252	1.753	0.580465	1.35248
1	8.09	150	943.6	945.1	944.35	1.5	0.4	29.6	0.451	23	55.92	9	1	0.289479	7.43416	96.252	0.746772	0.419535	0.457293
2	8.09	150	943.6	945.1	944.35	1.5	0.4	29.6	0.451	23	55.92	9	1	0.289479	7.43416	96.252	1.29636	0.419535	1.00688
3	8.09	150	943.6	945.1	944.35	1.5	0.4	29.6	0.451	23	55.92	9	1	0.289479	7.43416	96.252	1.87952	0.419535	1.59004
4	8.09	150	943.6	945.1	944.35	1.5	0.4	29.6	0.451	23	55.92	9	1	0.289479	7.43416	96.252	1.64877	0.419535	1.35929
5	8.09	150	943.6	945.1	944.35	1.5	0.4	29.6	0.451	23	55.92	9	1	0.289479	7.43416	96.252	1.37607	0.419535	1.0866
6	8.09	150	943.6	945.1	944.35	1.5	0.4	29.6	0.451	23	55.92	9	1	0.289479	7.43416	96.252	1.267	0.419535	0.977516
1	9.37	150	933.2	936.9	935.05	3.7	2	28.9	0.273	21	56.16	9	1	0.0857802	2.46025	96.6308	0.784797	0.182511	0.699017
2	9.37	150	933.2	936.9	935.05	3.7	2	28.9	0.273	21	56.16	9	1	0.0857802	2.46025	96.6308	0.786623	0.182511	0.700842
3	9.37	150	933.2	936.9	935.05	3.7	2	28.9	0.273	21	56.16	9	1	0.0857802	2.46025	96.6308	0.766546	0.182511	0.680766
4	9.37	150	933.2	936.9	935.05	3.7	2	28.9	0.273	21	56.16	9	1	0.0857802	2.46025	96.6308	0.565784	0.182511	0.480004
5	9.37	150	933.2	936.9	935.05	3.7	2	28.9	0.273	21	56.16	9	1	0.0857802	2.46025	96.6308	0.450802	0.182511	0.365022
6	9.37	150	933.2	936.9	935.05	3.7	2	28.9	0.273	21	56.16	9	1	0.0857802	2.46025	96.6308	0.319394	0.182511	0.233614
1	9.37	150	940.1	946.8	943.45	6.7	4.6	29.9	0.527	21	56.16	9	1	0.380858	10.9233	96.6308	3.48444	0.810336	3.10359
2	9.37	150	940.1	946.8	943.45	6.7	4.6	29.9	0.527	21	56.16	9	1	0.380858	10.9233	96.6308	3.49255	0.810336	3.11169
3	9.37	150	940.1	946.8	943.45	6.7	4.6	29.9	0.527	21	56.16	9	1	0.380858	10.9233	96.6308	3.40341	0.810336	3.02255
4	9.37	150	940.1	946.8	943.45	6.7	4.6	29.9	0.527	21	56.16	9	1	0.380858	10.9233	96.6308	2.51204	0.810336	2.13118
5	9.37	150	940.1	946.8	943.45	6.7	4.6	29.9	0.527	21	56.16	9	1	0.380858	10.9233	96.6308	2.00153	0.810336	1.62067
6	9.37	150	940.1	946.8	943.45	6.7	4.6	29.9	0.527	21	56.16	9	1	0.380858	10.9233	96.6308	1.41809	0.810336	1.03723
1	9.37	150	956	961.4	958.7	4.4	0.2	26.6	0.107	31	56.4	9	1	0.00336208	0.0964273	96.6308	0.0307595	0.00715336	0.0273974
2	9.37	150	956	961.4	958.7	4.4	0.2	26.6	0.107	31	56.4	9	1	0.00336208	0.0964273	96.6308	0.030831	0.00715336	0.0274689
3	9.37	150	956	961.4	958.7	4.4	0.2	26.6	0.107	31	56.4	9	1	0.00336208	0.0964273	96.6308	0.0300441	0.00715336	0.026682
4	9.37	150	956	961.4	958.7	4.4	0.2	26.6	0.107	31	56.4	9	1	0.00336208	0.0964273	96.6308	0.0221754	0.00715336	0.0188133
5	9.37	150	956	961.4	958.7	4.4	0.2	26.6	0.107	31	56.4	9	1	0.00336208	0.0964273	96.6308	0.0176688	0.00715336	0.0143067
6	9.37	150	956	961.4	958.7	4.4	0.2	26.6	0.107	31	56.4	9	1	0.00336208	0.0964273	96.6308	0.0125184	0.00715336	0.0091563
1	10.19	175	984.3	988	986.15	3.7	3.2	31.9	0.91	33	440	60	1	0.742974	16.7683	95.7572	4.0292	0.571518	3.28623
2	10.19	175	984.3	988	986.15	3.7	3.2	31.9	0.91	33	440	60	1	0.742974	16.7683	95.7572	4.64644	0.571518	3.90347
3	10.19	175	984.3	988	986.15	3.7	3.2	31.9	0.91	33	440	60	1	0.742974	16.7683	95.7572	3.81774	0.571518	3.07477
4	10.19	175	984.3	988	986.15	3.7	3.2	31.9	0.91	33	440	60	1	0.742974	16.7683	95.7572	3.52627	0.571518	2.78329
5	10.19	175	984.3	988	986.15	3.7	3.2	31.9	0.91	33	440	60	1	0.742974	16.7683	95.7572	3.06905	0.571518	2.32608
6	10.19	175	984.3	988	986.15	3.7	3.2	31.9	0.91	33	440	60	1	0.742974	16.7683	95.7572	2.33751	0.571518	1.59454
1	10.19	175	994.6	998.5	996.55	3.1	0.4	29.1	0.168	33	415	60	1	0.0171455	0.386962	95.7572	0.0929816	0.0131889	0.0758361
2	10.19	175	994.6	998.5	996.55	3.1	0.4	29.1	0.168	33	415	60	1	0.0171455	0.386962	95.7572	0.107226	0.0131889	0.0900801
3	10.19	175	994.6	998.5	996.55	3.1	0.4	29.1	0.168	33	415	60	1	0.0171455	0.386962	95.7572	0.0881017	0.0131889	0.0709562
4	10.19	175	994.6	998.5	996.55	3.1	0.4	29.1	0.168	33	415	60	1	0.0171455	0.386962	95.7572	0.0813754	0.0131889	0.0642299
5	10.19	175	994.6	998.5	996.55	3.1	0.4	29.1	0.168	33	415	60	1	0.0171455	0.386962	95.7572	0.0708243	0.0131889	0.0536788
6	10.19	175	994.6	998.5	996.55	3.1	0.4	29.1	0.168	33	415	60	1	0.0171455	0.386962	95.7572	0.0539425	0.0131889	0.036797
1	8.94	150	991.2	996.5	993.85	5.3	4	28.7	0.427	25	91.2	15	1	0.336255	11.0787	97.0543	2.49094	0.442441	2.15469
2	8.94	150	991.2	996.5	993.85	5.3	4	28.7	0.427	25	91.2	15	1	0.336255	11.0787	97.0543	1.32732	0.442441	0.991068
3	8.94	150	991.2	996.5	993.85	5.3	4	28.7	0.427	25	91.2	15	1	0.336255	11.0787	97.0543	0.999917	0.442441	0.663662
4	8.94	150	991.2	996.5	993.85	5.3	4	28.7	0.427	25	91.2	15	1	0.336255	11.0787	97.0543	0.738877	0.442441	0.402621
5	8.94	150	991.2	996.5	993.85	5.3	4	28.7	0.427	25	91.2	15	1	0.336255	11.0787	97.0543	0.588447	0.442441	0.252191
6	8.94	150	991.2	996.5	993.85	5.3	4	28.7	0.427	25	91.2	15	1	0.336255	11.0787	97.0543	0.539778	0.442441	0.203523
1	8.94	150	998.1	1000.2	999.15	2.1	1.9	31.9	0.686	21	55.92	9	1	0.256601	8.45434	97.0543	1.90088	0.337633	1.64427
2	8.94	150	998.1	1000.2	999.15	2.1	1.9	31.9	0.686	21	55.92	9	1	0.256601	8.45434	97.0543	1.0129	0.337633	0.756299
3	8.94	150	998.1	1000.2	999.15	2.1	1.9	31.9	0.686	21	55.92	9	1	0.256601	8.45434	97.0543	0.763051	0.337633	0.50645
4	8.94	150	998.1	1000.2	999.15	2.1	1.9	31.9	0.686	21	55.92	9	1	0.256601	8.45434	97.0543	0.563848	0.337633	0.307246
5	8.94	150	998.1	1000.2	999.15	2.1	1.9	31.9	0.686	21	55.92	9	1	0.256601	8.45434	97.0543	0.449052	0.337633	0.192451
6	8.94	150	998.1	1000.2	999.15	2.1	1.9	31.9	0.686	21	55.92	9	1	0.256601	8.45434	97.0543	0.411913	0.337633	0.155311
1	8.94	150	1003.7	1006	1004.85	2.3	1.5	30.6	0.566	27	55.92	9	1	0.167143	5.50693	97.0543	1.23818	0.219925	1.07104
2	8.94	150	1003.7	1006	1004.85	2.3	1.5	30.6	0.566	27	55.92	9	1	0.167143	5.50693	97.0543	0.659776	0.219925	0.492633
3	8.94	150	1003.7	1006	1004.85	2.3	1.5	30.6	0.566	27	55.92	9	1	0.167143	5.50693	97.0543	0.497031	0.219925	0.329888
4	8.94	150	1003.7	1006	1004.85	2.3	1.5	30.6	0.566	27	55.92	9	1	0.167143	5.50693	97.0543	0.367275	0.219925	0.200132
5	8.94	150	1003.7	1006	1004.85	2.3	1.5	30.6	0.566	27	55.92	9	1	0.167143	5.50693	97.0543	0.292501	0.219925	0.125357
6	8.94	150	1003.7	1006	1004.85	2.3	1.5	30.6	0.566	27	55.92	9	1	0.167143	5.50693	97.0543	0.268309	0.219925	0.101166
1	9.54	175	1002	1005.7	1003.85	3.7	2.9	30	0.92	37	90.96	15	1	0.499251	7.05661	93.3925	0.622504	0.156016	0.123253
2	9.54	175	1002	1005.7	1003.85	3.7	2.9	30	0.92	37	90.96	15	1	0.499251	7.05661	93.3925	0.700512	0.156016	0.201261
3	9.54	175	1002	1005.7	1003.85	3.7	2.9	30	0.92	37	90.96	15	1	0.499251	7.05661	93.3925	0.911134	0.156016	0.411882
4	9.54	175	1002	1005.7	1003.85	3.7	2.9	30	0.92	37	90.96	15	1	0.499251	7.05661	93.3925	0.800363	0.156016	0.301111
5	9.54	175	1002	1005.7	1003.85	3.7	2.9	30	0.92	37	90.96	15	1	0.499251	7.05661	93.3925	0.714554	0.156016	0.215302
1	9.54	175	1012.2	1016.3	1014.25	4.1	3.9	32.3	1.205	41	90.96	15	1	0.879397	12.4297	93.3925	1.0965	0.274812	0.217101
2	9.54	175	1012.2	1016.3	1014.25	4.1	3.9	32.3	1.205	41	90.96	15	1	0.879397	12.4297	93.3925	1.2339	0.274812	0.354507
3	9.54	175	1012.2	1016.3	1014.25	4.1	3.9	32.3	1.205	41	90.96	15	1	0.879397	12.4297	93.3925	1.6049	0.274812	0.725503
4	9.54	175	1012.2	1016.3	1014.25	4.1	3.9	32.3	1.205	41	90.96	15	1	0.879397	12.4297	93.3925	1.40978	0.274812	0.530387
5	9.54	175	1012.2	1016.3	1014.25	4.1	3.9	32.3	1.205	41	90.96	15	1	0.879397	12.4297	93.3925	1.25864	0.274812	0.37924
1	8.77	150	982.7	988.4	985.55	5.3	3.2	30.6	0.728	23	73.68	12	1	0.996226	17.2619	94.5437	2.59623	0.603774	1.6
2	8.77	150	982.7	988.4	985.55	5.3	3.2	30.6	0.728	23	73.68	12	1	0.996226	17.2619	94.5437	2.7834	0.603774	1.78717
3	8.77	150	982.7	988.4	985.55	5.3	3.2	30.6	0.728	23	73.68	12	1	0.996226	17.2619	94.5437	2.68679	0.603774	1.69057
4	8.77	150	982.7	988.4	985.55	5.3	3.2	30.6	0.728	23	73.68	12	1	0.996226	17.2619	94.5437	1.63019	0.603774	0.633962
5	8.77	150	982.7	988.4	985.55	5.3	3.2	30.6	0.728	23	73.68	12	1	0.996226	17.2619	94.5437	1.87774	0.603774	0.881509
6	8.77	150	982.7	988.4	985.55	5.3	3.2	30.6	0.728	23	73.68	12	1	0.996226	17.2619	94.5437	1.67245	0.603774	0.676226
1	10.02	125	946.3	950	948.15	3.7	3	31.6	0.987	34	55.92	9	1	0.116134	3.73876	96.9874	0.374625	0.374625	0.258491
2	10.02	125	946.3	950	948.15	3.7	3	31.6	0.987	34	55.92	9	1	0.116134	3.73876	96.9874	0.865384	0.374625	0.74925
3	10.02	125	946.3	950	948.15	3.7	3	31.6	0.987	34	55.92	9	1	0.116134	3.73876	96.9874	0.805444	0.374625	0.68931
4	10.02	125	946.3	950	948.15	3.7	3	31.6	0.987	34	55.92	9	1	0.116134	3.73876	96.9874	0.47952	0.374625	0.363386
5	10.02	125	946.3	950	948.15	3.7	3	31.6	0.987	34	55.92	9	1	0.116134	3.73876	96.9874	0.453296	0.374625	0.337163
1	10.02	125	951.9	953.8	952.85	1.9	1.8	31.6	0.926	40	55.92	9	1	0.0653738	2.10461	96.9874	0.210883	0.210883	0.145509
2	10.02	125	951.9	953.8	952.85	1.9	1.8	31.6	0.926	40	55.92	9	1	0.0653738	2.10461	96.9874	0.48714	0.210883	0.421766
3	10.02	125	951.9	953.8	952.85	1.9	1.8	31.6	0.926	40	55.92	9	1	0.0653738	2.10461	96.9874	0.453399	0.210883	0.388025
4	10.02	125	951.9	953.8	952.85	1.9	1.8	31.6	0.926	40	55.92	9	1	0.0653738	2.10461	96.9874	0.269931	0.210883	0.204557
5	10.02	125	951.9	953.8	952.85	1.9	1.8	31.6	0.926	40	55.92	9	1	0.0653738	2.10461	96.9874	0.255169	0.210883	0.189795
1	10.02	125	956.1	957.6	956.85	1.5	0.9	31.5	0.671	35	55.92	9	1	0.0236856	0.762525	96.9874	0.0764053	0.0764053	0.0527197
2	10.02	125	956.1	957.6	956.85	1.5	0.9	31.5	0.671	35	55.92	9	1	0.0236856	0.762525	96.9874	0.176496	0.0764053	0.152811
3	10.02	125	956.1	957.6	956.85	1.5	0.9	31.5	0.671	35	55.92	9	1	0.0236856	0.762525	96.9874	0.164271	0.0764053	0.140586
4	10.02	125	956.1	957.6	956.85	1.5	0.9	31.5	0.671	35	55.92	9	1	0.0236856	0.762525	96.9874	0.0977988	0.0764053	0.0741132
5	10.02	125	956.1	957.6	956.85	1.5	0.9	31.5	0.671	35	55.92	9	1	0.0236856	0.762525	96.9874	0.0924504	0.0764053	0.0687648
1	10.17	150	919	922	920.5	3	2.3	31.6	1.215	17	73.68	12	1	0.0341099	0.835694	96.0784	0.503122	0.426374	0.469012
1	9.78	150	1056	1059.3	1057.65	3.3	2.4	30.7	0.501	26	74.16	12	1	0.754306	6.07147	88.9492	2.44339	0.462764	1.68909
2	9.78	150	1056	1059.3	1057.65	3.3	2.4	30.7	0.501	26	74.16	12	1	0.754306	6.07147	88.9492	3.09126	0.462764	2.33696
3	9.78	150	1056	1059.3	1057.65	3.3	2.4	30.7	0.501	26	74.16	12	1	0.754306	6.07147	88.9492	2.91541	0.462764	2.16111
4	9.78	150	1056	1059.3	1057.65	3.3	2.4	30.7	0.501	26	74.16	12	1	0.754306	6.07147	88.9492	2.0593	0.462764	1.30499
5	9.78	150	1056	1059.3	1057.65	3.3	2.4	30.7	0.501	26	74.16	12	1	0.754306	6.07147	88.9492	1.96212	0.462764	1.20781
1	9.78	150	1066.7	1070.4	1068.55	3.7	3.3	28.4	0.423	31	74.16	12	1	0.875694	7.04853	88.9492	2.83661	0.537236	1.96091
2	9.78	150	1066.7	1070.4	1068.55	3.7	3.3	28.4	0.423	31	74.16	12	1	0.875694	7.04853	88.9492	3.58874	0.537236	2.71304
3	9.78	150	1066.7	1070.4	1068.55	3.7	3.3	28.4	0.423	31	74.16	12	1	0.875694	7.04853	88.9492	3.38459	0.537236	2.50889
4	9.78	150	1066.7	1070.4	1068.55	3.7	3.3	28.4	0.423	31	74.16	12	1	0.875694	7.04853	88.9492	2.3907	0.537236	1.51501
5	9.78	150	1066.7	1070.4	1068.55	3.7	3.3	28.4	0.423	31	74.16	12	1	0.875694	7.04853	88.9492	2.27788	0.537236	1.40219
1	10.17	150	969.8	972.6	971.2	2.8	2.7	30.5	0.444	18	91.2	15	1	0.284886	17.5205	98.4	1.89924	0.94962	1.61435
2	10.17	150	969.8	972.6	971.2	2.8	2.7	30.5	0.444	18	91.2	15	1	0.284886	17.5205	98.4	1.20602	0.94962	0.921131
3	10.17	150	969.8	972.6	971.2	2.8	2.7	30.5	0.444	18	91.2	15	1	0.284886	17.5205	98.4	1.83277	0.94962	1.54788
4	10.17	150	969.8	972.6	971.2	2.8	2.7	30.5	0.444	18	91.2	15	1	0.284886	17.5205	98.4	0.902139	0.94962	0.617253
5	10.17	150	969.8	972.6	971.2	2.8	2.7	30.5	0.444	18	91.2	15	1	0.284886	17.5205	98.4	1.97521	0.94962	1.69032
6	10.17	150	969.8	972.6	971.2	2.8	2.7	30.5	0.444	18	91.2	15	1	0.284886	17.5205	98.4	1.70932	0.94962	1.42443
1	10.17	150	974.1	975.6	974.85	1.1	0.6	26.6	0.106	21	114.48	19	1	0.0151141	0.929515	98.4	0.10076	0.0503802	0.0856464
2	10.17	150	974.1	975.6	974.85	1.1	0.6	26.6	0.106	21	114.48	19	1	0.0151141	0.929515	98.4	0.0639829	0.0503802	0.0488688
3	10.17	150	974.1	975.6	974.85	1.1	0.6	26.6	0.106	21	114.48	19	1	0.0151141	0.929515	98.4	0.0972338	0.0503802	0.0821198
4	10.17	150	974.1	975.6	974.85	1.1	0.6	26.6	0.106	21	114.48	19	1	0.0151141	0.929515	98.4	0.0478612	0.0503802	0.0327471
5	10.17	150	974.1	975.6	974.85	1.1	0.6	26.6	0.106	21	114.48	19	1	0.0151141	0.929515	98.4	0.104791	0.0503802	0.0896768
6	10.17	150	974.1	975.6	974.85	1.1	0.6	26.6	0.106	21	114.48	19	1	0.0151141	0.929515	98.4	0.0906844	0.0503802	0.0755703
1	8.91	106	936.1	940.8	938.45	4.1	2.9	31.6	0.83	24	55.92	9	1	0.680197	17.8122	96.3217	1.8911	0.747469	1.2109
2	8.91	106	936.1	940.8	938.45	4.1	2.9	31.6	0.83	24	55.92	9	1	0.680197	17.8122	96.3217	2.25736	0.747469	1.57716
3	8.91	106	936.1	940.8	938.45	4.1	2.9	31.6	0.83	24	55.92	9	1	0.680197	17.8122	96.3217	2.55634	0.747469	1.87615
4	8.91	106	936.1	940.8	938.45	4.1	2.9	31.6	0.83	24	55.92	9	1	0.680197	17.8122	96.3217	2.68341	0.747469	2.00322
5	8.91	106	936.1	940.8	938.45	4.1	2.9	31.6	0.83	24	55.92	9	1	0.680197	17.8122	96.3217	3.88684	0.747469	3.20664
6	8.91	106	936.1	940.8	938.45	4.1	2.9	31.6	0.83	24	55.92	9	1	0.680197	17.8122	96.3217	3.6028	0.747469	2.9226
1	11.23	175	989.2	995.5	992.35	5.5	4.2	28.6	1.004	25	90.96	15	1	0.602391	10.531	94.5893	1.4859	0.308919	0.883507
2	11.23	175	989.2	995.5	992.35	5.5	4.2	28.6	1.004	25	90.96	15	1	0.602391	10.531	94.5893	1.2573	0.308919	0.654907
3	11.23	175	989.2	995.5	992.35	5.5	4.2	28.6	1.004	25	90.96	15	1	0.602391	10.531	94.5893	1.27274	0.308919	0.670353
4	11.23	175	989.2	995.5	992.35	5.5	4.2	28.6	1.004	25	90.96	15	1	0.602391	10.531	94.5893	1.34997	0.308919	0.747583
5	11.23	175	989.2	995.5	992.35	5.5	4.2	28.6	1.004	25	90.96	15	1	0.602391	10.531	94.5893	1.07195	0.308919	0.469556
6	11.23	175	989.2	995.5	992.35	5.5	4.2	28.6	1.004	25	90.96	15	1	0.602391	10.531	94.5893	0.926756	0.308919	0.324364
1	9.86	175	968.8	971.3	970.05	2.5	1.8	31	0.559	27	114.52	19	1	0.729946	15.7416	95.5684	1.5247	0.341096	0.794754
2	9.86	175	968.8	971.3	970.05	2.5	1.8	31	0.559	27	114.52	19	1	0.729946	15.7416	95.5684	1.42578	0.341096	0.695836
3	9.86	175	968.8	971.3	970.05	2.5	1.8	31	0.559	27	114.52	19	1	0.729946	15.7416	95.5684	1.21089	0.341096	0.480946
4	9.86	175	968.8	971.3	970.05	2.5	1.8	31	0.559	27	114.52	19	1	0.729946	15.7416	95.5684	1.14949	0.341096	0.419548
5	9.86	175	968.8	971.3	970.05	2.5	1.8	31	0.559	27	114.52	19	1	0.729946	15.7416	95.5684	1.00282	0.341096	0.272877
6	9.86	175	968.8	971.3	970.05	2.5	1.8	31	0.559	27	114.52	19	1	0.729946	15.7416	95.5684	0.866385	0.341096	0.136439
1	6.64	106	965.8	971.8	968.8	6	5.7	32.3	1.458	46	340	50	1	0.214784	14.8115	98.5706	5.75622	0.859137	5.54143
2	6.64	106	965.8	971.8	968.8	6	5.7	32.3	1.458	46	340	50	1	0.214784	14.8115	98.5706	4.51047	0.859137	4.29568
3	6.64	106	965.8	971.8	968.8	6	5.7	32.3	1.458	46	340	50	1	0.214784	14.8115	98.5706	6.57239	0.859137	6.35761
4	6.64	106	965.8	971.8	968.8	6	5.7	32.3	1.458	46	340	50	1	0.214784	14.8115	98.5706	5.04313	0.859137	4.82835
5	6.64	106	965.8	971.8	968.8	6	5.7	32.3	1.458	46	340	50	1	0.214784	14.8115	98.5706	3.81457	0.859137	3.59978
6	6.64	106	965.8	971.8	968.8	6	5.7	32.3	1.458	46	340	50	1	0.214784	14.8115	98.5706	2.61178	0.859137	2.39699
1	8.72	106	969.6	973	971.3	3.4	2.8	32.7	0.95	36	329.4	45	1	0.193818	18.6153	98.9696	2.66646	0.293663	2.47264
2	8.72	106	969.6	973	971.3	3.4	2.8	32.7	0.95	36	329.4	45	1	0.193818	18.6153	98.9696	2.56662	0.293663	2.3728
3	8.72	106	969.6	973	971.3	3.4	2.8	32.7	0.95	36	329.4	45	1	0.193818	18.6153	98.9696	2.1966	0.293663	2.00278
4	8.72	106	969.6	973	971.3	3.4	2.8	32.7	0.95	36	329.4	45	1	0.193818	18.6153	98.9696	1.9558	0.293663	1.76198
5	8.72	106	969.6	973	971.3	3.4	2.8	32.7	0.95	36	329.4	45	1	0.193818	18.6153	98.9696	1.83833	0.293663	1.64451
6	8.72	106	969.6	973	971.3	3.4	2.8	32.7	0.95	36	329.4	45	1	0.193818	18.6153	98.9696	1.65332	0.293663	1.45951
1	9.06	125	945.7	950.9	948.3	5.2	3.7	32.8	1.288	15	56	9	1	1.3788	13.5314	90.7526	2.03123	0.434952	0.652429
2	9.06	125	945.7	950.9	948.3	5.2	3.7	32.8	1.288	15	56	9	1	1.3788	13.5314	90.7526	2.38354	0.434952	1.00474
3	9.06	125	945.7	950.9	948.3	5.2	3.7	32.8	1.288	15	56	9	1	1.3788	13.5314	90.7526	2.2487	0.434952	0.869905
4	9.06	125	945.7	950.9	948.3	5.2	3.7	32.8	1.288	15	56	9	1	1.3788	13.5314	90.7526	2.84894	0.434952	1.47014
5	9.06	125	945.7	950.9	948.3	5.2	3.7	32.8	1.288	15	56	9	1	1.3788	13.5314	90.7526	2.36614	0.434952	0.987342
6	9.06	125	945.7	950.9	948.3	5.2	3.7	32.8	1.288	15	56	9	1	1.3788	13.5314	90.7526	3.71014	0.434952	2.33135
1	9.77	150	1040.7	1046.7	1043.7	5.1	3.4	31.5	0.91	25	71.28	11.5	1	0.246993	10.703	97.7444	2.34327	0.633316	2.09627
2	9.77	150	1040.7	1046.7	1043.7	5.1	3.4	31.5	0.91	25	71.28	11.5	1	0.246993	10.703	97.7444	2.5206	0.633316	2.2736
3	9.77	150	1040.7	1046.7	1043.7	5.1	3.4	31.5	0.91	25	71.28	11.5	1	0.246993	10.703	97.7444	0.614316	0.633316	0.367323
4	9.77	150	1040.7	1046.7	1043.7	5.1	3.4	31.5	0.91	25	71.28	11.5	1	0.246993	10.703	97.7444	0.538318	0.633316	0.291325
5	9.77	150	1040.7	1046.7	1043.7	5.1	3.4	31.5	0.91	25	71.28	11.5	1	0.246993	10.703	97.7444	0.873976	0.633316	0.626982
6	9.77	150	1040.7	1046.7	1043.7	5.1	3.4	31.5	0.91	25	71.28	11.5	1	0.246993	10.703	97.7444	1.04497	0.633316	0.797978
1	9.77	150	1048.7	1051.8	1050.25	3.1	3	31.6	0.454	29	71.28	11.5	1	0.108728	4.71155	97.7444	1.03152	0.27879	0.922794
2	9.77	150	1048.7	1051.8	1050.25	3.1	3	31.6	0.454	29	71.28	11.5	1	0.108728	4.71155	97.7444	1.10958	0.27879	1.00086
3	9.77	150	1048.7	1051.8	1050.25	3.1	3	31.6	0.454	29	71.28	11.5	1	0.108728	4.71155	97.7444	0.270426	0.27879	0.161698
4	9.77	150	1048.7	1051.8	1050.25	3.1	3	31.6	0.454	29	71.28	11.5	1	0.108728	4.71155	97.7444	0.236971	0.27879	0.128243
5	9.77	150	1048.7	1051.8	1050.25	3.1	3	31.6	0.454	29	71.28	11.5	1	0.108728	4.71155	97.7444	0.38473	0.27879	0.276002
6	9.77	150	1048.7	1051.8	1050.25	3.1	3	31.6	0.454	29	71.28	11.5	1	0.108728	4.71155	97.7444	0.460003	0.27879	0.351275
1	9.77	150	1055.8	1058.4	1057.1	2.2	0.4	28.2	0.113	22	132.48	22	1	0.0036083	0.15636	97.7444	0.0342326	0.00925206	0.0306243
2	9.77	150	1055.8	1058.4	1057.1	2.2	0.4	28.2	0.113	22	132.48	22	1	0.0036083	0.15636	97.7444	0.0368232	0.00925206	0.0332149
3	9.77	150	1055.8	1058.4	1057.1	2.2	0.4	28.2	0.113	22	132.48	22	1	0.0036083	0.15636	97.7444	0.0089745	0.00925206	0.00536619
4	9.77	150	1055.8	1058.4	1057.1	2.2	0.4	28.2	0.113	22	132.48	22	1	0.0036083	0.15636	97.7444	0.00786425	0.00925206	0.00425595
5	9.77	150	1055.8	1058.4	1057.1	2.2	0.4	28.2	0.113	22	132.48	22	1	0.0036083	0.15636	97.7444	0.0127678	0.00925206	0.00915954
6	9.77	150	1055.8	1058.4	1057.1	2.2	0.4	28.2	0.113	22	132.48	22	1	0.0036083	0.15636	97.7444	0.0152659	0.00925206	0.0116576
1	9.77	150	1065.3	1068.3	1066.8	2.1	0.8	31.6	0.376	34	91.44	15	1	0.0240128	1.04055	97.7444	0.227813	0.0615712	0.203801
2	9.77	150	1065.3	1068.3	1066.8	2.1	0.8	31.6	0.376	34	91.44	15	1	0.0240128	1.04055	97.7444	0.245053	0.0615712	0.221041
3	9.77	150	1065.3	1068.3	1066.8	2.1	0.8	31.6	0.376	34	91.44	15	1	0.0240128	1.04055	97.7444	0.0597241	0.0615712	0.0357113
4	9.77	150	1065.3	1068.3	1066.8	2.1	0.8	31.6	0.376	34	91.44	15	1	0.0240128	1.04055	97.7444	0.0523355	0.0615712	0.0283228
5	9.77	150	1065.3	1068.3	1066.8	2.1	0.8	31.6	0.376	34	91.44	15	1	0.0240128	1.04055	97.7444	0.0849683	0.0615712	0.0609555
6	9.77	150	1065.3	1068.3	1066.8	2.1	0.8	31.6	0.376	34	91.44	15	1	0.0240128	1.04055	97.7444	0.101593	0.0615712	0.0775797
1	9.77	150	1071.1	1072.7	1071.9	1.6	0.6	27.5	0.139	32	91.68	15	1	0.0066578	0.288505	97.7444	0.0631637	0.0170713	0.0565059
2	9.77	150	1071.1	1072.7	1071.9	1.6	0.6	27.5	0.139	32	91.68	15	1	0.0066578	0.288505	97.7444	0.0679437	0.0170713	0.0612859
3	9.77	150	1071.1	1072.7	1071.9	1.6	0.6	27.5	0.139	32	91.68	15	1	0.0066578	0.288505	97.7444	0.0165591	0.0170713	0.00990134
4	9.77	150	1071.1	1072.7	1071.9	1.6	0.6	27.5	0.139	32	91.68	15	1	0.0066578	0.288505	97.7444	0.0145106	0.0170713	0.00785279
5	9.77	150	1071.1	1072.7	1071.9	1.6	0.6	27.5	0.139	32	91.68	15	1	0.0066578	0.288505	97.7444	0.0235584	0.0170713	0.0169006
6	9.77	150	1071.1	1072.7	1071.9	1.6	0.6	27.5	0.139	32	91.68	15	1	0.0066578	0.288505	97.7444	0.0281676	0.0170713	0.0215098
1	10.13	150	1091.5	1093.1	1092.3	1.6	0.2	25.6	0.069	24	91.28	15	1	0.00430911	0.0988992	95.8248	0.0143637	0.00350334	0.0100546
2	10.13	150	1091.5	1093.1	1092.3	1.6	0.2	25.6	0.069	24	91.28	15	1	0.00430911	0.0988992	95.8248	0.0118763	0.00350334	0.00756721
3	10.13	150	1091.5	1093.1	1092.3	1.6	0.2	25.6	0.069	24	91.28	15	1	0.00430911	0.0988992	95.8248	0.00462441	0.00350334	0.0003153
4	10.13	150	1091.5	1093.1	1092.3	1.6	0.2	25.6	0.069	24	91.28	15	1	0.00430911	0.0988992	95.8248	0.00518494	0.00350334	0.000875835
5	10.13	150	1091.5	1093.1	1092.3	1.6	0.2	25.6	0.069	24	91.28	15	1	0.00430911	0.0988992	95.8248	0.00753218	0.00350334	0.00322307
6	10.13	150	1091.5	1093.1	1092.3	1.6	0.2	25.6	0.069	24	91.28	15	1	0.00430911	0.0988992	95.8248	0.00788251	0.00350334	0.00357341
1	10.13	150	1100.5	1102.5	1101.5	2	1	28.3	0.331	22	91.28	15	1	0.103356	2.37215	95.8248	0.34452	0.0840293	0.241164
2	10.13	150	1100.5	1102.5	1101.5	2	1	28.3	0.331	22	91.28	15	1	0.103356	2.37215	95.8248	0.284859	0.0840293	0.181503
3	10.13	150	1100.5	1102.5	1101.5	2	1	28.3	0.331	22	91.28	15	1	0.103356	2.37215	95.8248	0.110919	0.0840293	0.00756264
4	10.13	150	1100.5	1102.5	1101.5	2	1	28.3	0.331	22	91.28	15	1	0.103356	2.37215	95.8248	0.124363	0.0840293	0.0210073
5	10.13	150	1100.5	1102.5	1101.5	2	1	28.3	0.331	22	91.28	15	1	0.103356	2.37215	95.8248	0.180663	0.0840293	0.077307
6	10.13	150	1100.5	1102.5	1101.5	2	1	28.3	0.331	22	91.28	15	1	0.103356	2.37215	95.8248	0.189066	0.0840293	0.0857099
1	10.13	150	1104.4	1108.9	1106.65	4.5	4.1	30	0.648	22	53.76	8.5	1	0.829597	19.0403	95.8248	2.76532	0.674469	1.93573
2	10.13	150	1104.4	1108.9	1106.65	4.5	4.1	30	0.648	22	53.76	8.5	1	0.829597	19.0403	95.8248	2.28645	0.674469	1.45685
3	10.13	150	1104.4	1108.9	1106.65	4.5	4.1	30	0.648	22	53.76	8.5	1	0.829597	19.0403	95.8248	0.890299	0.674469	0.0607022
4	10.13	150	1104.4	1108.9	1106.65	4.5	4.1	30	0.648	22	53.76	8.5	1	0.829597	19.0403	95.8248	0.998214	0.674469	0.168617
5	10.13	150	1104.4	1108.9	1106.65	4.5	4.1	30	0.648	22	53.76	8.5	1	0.829597	19.0403	95.8248	1.45011	0.674469	0.620511
6	10.13	150	1104.4	1108.9	1106.65	4.5	4.1	30	0.648	22	53.76	8.5	1	0.829597	19.0403	95.8248	1.51755	0.674469	0.687958
1	10.13	150	1122.3	1125.6	1123.95	1.8	0.7	28.3	0.301	41	91.56	15	1	0.0657919	1.51001	95.8248	0.219306	0.0534894	0.153515
2	10.13	150	1122.3	1125.6	1123.95	1.8	0.7	28.3	0.301	41	91.56	15	1	0.0657919	1.51001	95.8248	0.181329	0.0534894	0.115537
3	10.13	150	1122.3	1125.6	1123.95	1.8	0.7	28.3	0.301	41	91.56	15	1	0.0657919	1.51001	95.8248	0.070606	0.0534894	0.00481404
4	10.13	150	1122.3	1125.6	1123.95	1.8	0.7	28.3	0.301	41	91.56	15	1	0.0657919	1.51001	95.8248	0.0791643	0.0534894	0.0133723
5	10.13	150	1122.3	1125.6	1123.95	1.8	0.7	28.3	0.301	41	91.56	15	1	0.0657919	1.51001	95.8248	0.115002	0.0534894	0.0492102
6	10.13	150	1122.3	1125.6	1123.95	1.8	0.7	28.3	0.301	41	91.56	15	1	0.0657919	1.51001	95.8248	0.120351	0.0534894	0.0545592
1	11.77	150	1084.7	1088.5	1086.6	3.1	2.1	28.4	0.356	26	62.16	10	1	0.836741	6.86076	89.1297	3.1827	0.256669	2.34596
2	11.77	150	1084.7	1088.5	1086.6	3.1	2.1	28.4	0.356	26	62.16	10	1	0.836741	6.86076	89.1297	1.92245	0.256669	1.08571
3	11.77	150	1084.7	1088.5	1086.6	3.1	2.1	28.4	0.356	26	62.16	10	1	0.836741	6.86076	89.1297	1.38088	0.256669	0.544138
4	11.77	150	1084.7	1088.5	1086.6	3.1	2.1	28.4	0.356	26	62.16	10	1	0.836741	6.86076	89.1297	1.14731	0.256669	0.31057
5	11.77	150	1084.7	1088.5	1086.6	3.1	2.1	28.4	0.356	26	62.16	10	1	0.836741	6.86076	89.1297	1.30901	0.256669	0.472271
6	11.77	150	1084.7	1088.5	1086.6	3.1	2.1	28.4	0.356	26	62.16	10	1	0.836741	6.86076	89.1297	1.12421	0.256669	0.287469
1	11.77	150	1093	1096.5	1094.75	3.5	3.4	28.6	0.365	21	62.16	10	1	1.38897	11.3887	89.1297	5.28321	0.426065	3.89424
2	11.77	150	1093	1096.5	1094.75	3.5	3.4	28.6	0.365	21	62.16	10	1	1.38897	11.3887	89.1297	3.19123	0.426065	1.80226
3	11.77	150	1093	1096.5	1094.75	3.5	3.4	28.6	0.365	21	62.16	10	1	1.38897	11.3887	89.1297	2.29223	0.426065	0.903258
4	11.77	150	1093	1096.5	1094.75	3.5	3.4	28.6	0.365	21	62.16	10	1	1.38897	11.3887	89.1297	1.90451	0.426065	0.515539
5	11.77	150	1093	1096.5	1094.75	3.5	3.4	28.6	0.365	21	62.16	10	1	1.38897	11.3887	89.1297	2.17293	0.426065	0.78396
6	11.77	150	1093	1096.5	1094.75	3.5	3.4	28.6	0.365	21	62.16	10	1	1.38897	11.3887	89.1297	1.86617	0.426065	0.477193
1	11.77	150	1100.2	1102.5	1101.35	0.7	0.5	27.9	0.181	31	91.28	15	1	0.101291	0.830523	89.1297	0.385278	0.0310708	0.283987
2	11.77	150	1100.2	1102.5	1101.35	0.7	0.5	27.9	0.181	31	91.28	15	1	0.101291	0.830523	89.1297	0.23272	0.0310708	0.13143
3	11.77	150	1100.2	1102.5	1101.35	0.7	0.5	27.9	0.181	31	91.28	15	1	0.101291	0.830523	89.1297	0.167161	0.0310708	0.0658702
4	11.77	150	1100.2	1102.5	1101.35	0.7	0.5	27.9	0.181	31	91.28	15	1	0.101291	0.830523	89.1297	0.138887	0.0310708	0.0375957
5	11.77	150	1100.2	1102.5	1101.35	0.7	0.5	27.9	0.181	31	91.28	15	1	0.101291	0.830523	89.1297	0.158461	0.0310708	0.0571703
6	11.77	150	1100.2	1102.5	1101.35	0.7	0.5	27.9	0.181	31	91.28	15	1	0.101291	0.830523	89.1297	0.13609	0.0310708	0.0347993
1	11.77	150	1107	1112	1109.5	3.4	2	28.6	0.352	21	91.28	15	1	0.787942	6.46064	89.1297	2.99708	0.2417	2.20914
2	11.77	150	1107	1112	1109.5	3.4	2	28.6	0.352	21	91.28	15	1	0.787942	6.46064	89.1297	1.81033	0.2417	1.02239
3	11.77	150	1107	1112	1109.5	3.4	2	28.6	0.352	21	91.28	15	1	0.787942	6.46064	89.1297	1.30035	0.2417	0.512404
4	11.77	150	1107	1112	1109.5	3.4	2	28.6	0.352	21	91.28	15	1	0.787942	6.46064	89.1297	1.0804	0.2417	0.292457
5	11.77	150	1107	1112	1109.5	3.4	2	28.6	0.352	21	91.28	15	1	0.787942	6.46064	89.1297	1.23267	0.2417	0.444728
6	11.77	150	1107	1112	1109.5	3.4	2	28.6	0.352	21	91.28	15	1	0.787942	6.46064	89.1297	1.05865	0.2417	0.270704
1	11.77	150	1113.5	1116.3	1114.9	1.2	0.8	27.7	0.162	29	91.28	15	1	0.145053	1.18935	89.1297	0.551736	0.0444948	0.406682
2	11.77	150	1113.5	1116.3	1114.9	1.2	0.8	27.7	0.162	29	91.28	15	1	0.145053	1.18935	89.1297	0.333266	0.0444948	0.188213
3	11.77	150	1113.5	1116.3	1114.9	1.2	0.8	27.7	0.162	29	91.28	15	1	0.145053	1.18935	89.1297	0.239382	0.0444948	0.094329
4	11.77	150	1113.5	1116.3	1114.9	1.2	0.8	27.7	0.162	29	91.28	15	1	0.145053	1.18935	89.1297	0.198892	0.0444948	0.0538387
5	11.77	150	1113.5	1116.3	1114.9	1.2	0.8	27.7	0.162	29	91.28	15	1	0.145053	1.18935	89.1297	0.226923	0.0444948	0.0818704
6	11.77	150	1113.5	1116.3	1114.9	1.2	0.8	27.7	0.162	29	91.28	15	1	0.145053	1.18935	89.1297	0.194887	0.0444948	0.0498342
1	10.64	150	1103.3	1106.7	1105	3	2.6	29.5	0.579	22	95.04	11.5	1	0.146624	6.20064	97.69	0.868166	0.385852	0.721542
2	10.64	150	1103.3	1106.7	1105	3	2.6	29.5	0.579	22	95.04	11.5	1	0.146624	6.20064	97.69	0.447588	0.385852	0.300964
3	10.64	150	1103.3	1106.7	1105	3	2.6	29.5	0.579	22	95.04	11.5	1	0.146624	6.20064	97.69	0.351125	0.385852	0.204501
4	10.64	150	1103.3	1106.7	1105	3	2.6	29.5	0.579	22	95.04	11.5	1	0.146624	6.20064	97.69	0.401286	0.385852	0.254662
5	10.64	150	1103.3	1106.7	1105	3	2.6	29.5	0.579	22	95.04	11.5	1	0.146624	6.20064	97.69	0.459163	0.385852	0.31254
6	10.64	150	1103.3	1106.7	1105	3	2.6	29.5	0.579	22	95.04	11.5	1	0.146624	6.20064	97.69	0.594211	0.385852	0.447588
1	10.64	150	1125.6	1126.7	1126.15	1.1	1.1	29.2	0.463	20	91.44	15	1	0.049605	2.09777	97.69	0.293714	0.13054	0.244109
2	10.64	150	1125.6	1126.7	1126.15	1.1	1.1	29.2	0.463	20	91.44	15	1	0.049605	2.09777	97.69	0.151426	0.13054	0.101821
3	10.64	150	1125.6	1126.7	1126.15	1.1	1.1	29.2	0.463	20	91.44	15	1	0.049605	2.09777	97.69	0.118791	0.13054	0.069186
4	10.64	150	1125.6	1126.7	1126.15	1.1	1.1	29.2	0.463	20	91.44	15	1	0.049605	2.09777	97.69	0.135761	0.13054	0.0861561
5	10.64	150	1125.6	1126.7	1126.15	1.1	1.1	29.2	0.463	20	91.44	15	1	0.049605	2.09777	97.69	0.155342	0.13054	0.105737
6	10.64	150	1125.6	1126.7	1126.15	1.1	1.1	29.2	0.463	20	91.44	15	1	0.049605	2.09777	97.69	0.201031	0.13054	0.151426
1	10.64	150	1128.2	1132.9	1130.55	4.7	2.6	29.8	0.554	20	71.04	11.5	1	0.140293	5.9329	97.69	0.830681	0.369191	0.690388
2	10.64	150	1128.2	1132.9	1130.55	4.7	2.6	29.8	0.554	20	71.04	11.5	1	0.140293	5.9329	97.69	0.428262	0.369191	0.287969
3	10.64	150	1128.2	1132.9	1130.55	4.7	2.6	29.8	0.554	20	71.04	11.5	1	0.140293	5.9329	97.69	0.335964	0.369191	0.195671
4	10.64	150	1128.2	1132.9	1130.55	4.7	2.6	29.8	0.554	20	71.04	11.5	1	0.140293	5.9329	97.69	0.383959	0.369191	0.243666
5	10.64	150	1128.2	1132.9	1130.55	4.7	2.6	29.8	0.554	20	71.04	11.5	1	0.140293	5.9329	97.69	0.439338	0.369191	0.299045
6	10.64	150	1128.2	1132.9	1130.55	4.7	2.6	29.8	0.554	20	71.04	11.5	1	0.140293	5.9329	97.69	0.568555	0.369191	0.428262
1	10.64	150	1134	1135.4	1134.7	1.4	0.8	29.6	0.558	22	119.8	19	1	0.0434787	1.83869	97.69	0.257439	0.114418	0.213961
2	10.64	150	1134	1135.4	1134.7	1.4	0.8	29.6	0.558	22	119.8	19	1	0.0434787	1.83869	97.69	0.132724	0.114418	0.0892457
3	10.64	150	1134	1135.4	1134.7	1.4	0.8	29.6	0.558	22	119.8	19	1	0.0434787	1.83869	97.69	0.10412	0.114418	0.0606413
4	10.64	150	1134	1135.4	1134.7	1.4	0.8	29.6	0.558	22	119.8	19	1	0.0434787	1.83869	97.69	0.118994	0.114418	0.0755156
5	10.64	150	1134	1135.4	1134.7	1.4	0.8	29.6	0.558	22	119.8	19	1	0.0434787	1.83869	97.69	0.136157	0.114418	0.0926782
6	10.64	150	1134	1135.4	1134.7	1.4	0.8	29.6	0.558	22	119.8	19	1	0.0434787	1.83869	97.69	0.176203	0.114418	0.132724
1	10.93	150	891.7	895.9	893.8	4.2	2.7	32	1.2	19	52.64	8.5	1	2.11602	26.2963	92.5524	5.49371	0.993438	3.37769
2	10.93	150	891.7	895.9	893.8	4.2	2.7	32	1.2	19	52.64	8.5	1	2.11602	26.2963	92.5524	4.78837	0.993438	2.67235
3	10.93	150	891.7	895.9	893.8	4.2	2.7	32	1.2	19	52.64	8.5	1	2.11602	26.2963	92.5524	4.14264	0.993438	2.02661
4	10.93	150	891.7	895.9	893.8	4.2	2.7	32	1.2	19	52.64	8.5	1	2.11602	26.2963	92.5524	4.7387	0.993438	2.62268
5	10.93	150	891.7	895.9	893.8	4.2	2.7	32	1.2	19	52.64	8.5	1	2.11602	26.2963	92.5524	4.30159	0.993438	2.18556
6	10.93	150	891.7	895.9	893.8	4.2	2.7	32	1.2	19	52.64	8.5	1	2.11602	26.2963	92.5524	5.55332	0.993438	3.4373
1	10.93	150	902.2	904.5	903.35	2.3	0.2	27.4	0.107	22	143.92	24	1	0.0139762	0.173686	92.5524	0.0362856	0.0065616	0.0223094
2	10.93	150	902.2	904.5	903.35	2.3	0.2	27.4	0.107	22	143.92	24	1	0.0139762	0.173686	92.5524	0.0316269	0.0065616	0.0176507
3	10.93	150	902.2	904.5	903.35	2.3	0.2	27.4	0.107	22	143.92	24	1	0.0139762	0.173686	92.5524	0.0273619	0.0065616	0.0133857
4	10.93	150	902.2	904.5	903.35	2.3	0.2	27.4	0.107	22	143.92	24	1	0.0139762	0.173686	92.5524	0.0312988	0.0065616	0.0173226
5	10.93	150	902.2	904.5	903.35	2.3	0.2	27.4	0.107	22	143.92	24	1	0.0139762	0.173686	92.5524	0.0284117	0.0065616	0.0144355
6	10.93	150	902.2	904.5	903.35	2.3	0.2	27.4	0.107	22	143.92	24	1	0.0139762	0.173686	92.5524	0.0366793	0.0065616	0.0227031
1	10.13	150	908.4	910.2	909.3	1.8	1.6	29.8	0.357	23	73.44	12	1	0.509444	18.795	97.361	1.24056	0.388889	0.731111
2	10.13	150	908.4	910.2	909.3	1.8	1.6	29.8	0.357	23	73.44	12	1	0.509444	18.795	97.361	1.29889	0.388889	0.789444
3	10.13	150	908.4	910.2	909.3	1.8	1.6	29.8	0.357	23	73.44	12	1	0.509444	18.795	97.361	1.64889	0.388889	1.13944
4	10.13	150	908.4	910.2	909.3	1.8	1.6	29.8	0.357	23	73.44	12	1	0.509444	18.795	97.361	2.01833	0.388889	1.50889
5	10.13	150	908.4	910.2	909.3	1.8	1.6	29.8	0.357	23	73.44	12	1	0.509444	18.795	97.361	1.25222	0.388889	0.742778
6	10.13	150	908.4	910.2	909.3	1.8	1.6	29.8	0.357	23	73.44	12	1	0.509444	18.795	97.361	1.09667	0.388889	0.587222
1	10.13	150	912.2	915.5	913.85	2.8	2.2	31.5	0.408	24	114.4	19	1	0.800556	29.535	97.361	1.94944	0.611111	1.14889
2	10.13	150	912.2	915.5	913.85	2.8	2.2	31.5	0.408	24	114.4	19	1	0.800556	29.535	97.361	2.04111	0.611111	1.24056
3	10.13	150	912.2	915.5	913.85	2.8	2.2	31.5	0.408	24	114.4	19	1	0.800556	29.535	97.361	2.59111	0.611111	1.79056
4	10.13	150	912.2	915.5	913.85	2.8	2.2	31.5	0.408	24	114.4	19	1	0.800556	29.535	97.361	3.17167	0.611111	2.37111
5	10.13	150	912.2	915.5	913.85	2.8	2.2	31.5	0.408	24	114.4	19	1	0.800556	29.535	97.361	1.96778	0.611111	1.16722
6	10.13	150	912.2	915.5	913.85	2.8	2.2	31.5	0.408	24	114.4	19	1	0.800556	29.535	97.361	1.72333	0.611111	0.922778
1	11.54	150	1094.5	1099.7	1097.1	5.2	4.9	28.8	0.536	22	62.16	10	1	1.02926	19.8416	95.0684	4.35955	0.538881	3.33029
2	11.54	150	1094.5	1099.7	1097.1	5.2	4.9	28.8	0.536	22	62.16	10	1	1.02926	19.8416	95.0684	4.32183	0.538881	3.29257
3	11.54	150	1094.5	1099.7	1097.1	5.2	4.9	28.8	0.536	22	62.16	10	1	1.02926	19.8416	95.0684	2.55969	0.538881	1.53042
4	11.54	150	1094.5	1099.7	1097.1	5.2	4.9	28.8	0.536	22	62.16	10	1	1.02926	19.8416	95.0684	3.11473	0.538881	2.08547
5	11.54	150	1094.5	1099.7	1097.1	5.2	4.9	28.8	0.536	22	62.16	10	1	1.02926	19.8416	95.0684	2.67285	0.538881	1.64359
6	11.54	150	1094.5	1099.7	1097.1	5.2	4.9	28.8	0.536	22	62.16	10	1	1.02926	19.8416	95.0684	2.41958	0.538881	1.39031
1	11.54	150	1102	1106	1104	2.3	2.1	28.2	0.618	25	91.56	15	1	0.508597	9.80446	95.0684	2.15421	0.266281	1.64562
2	11.54	150	1102	1106	1104	2.3	2.1	28.2	0.618	25	91.56	15	1	0.508597	9.80446	95.0684	2.13557	0.266281	1.62698
3	11.54	150	1102	1106	1104	2.3	2.1	28.2	0.618	25	91.56	15	1	0.508597	9.80446	95.0684	1.26483	0.266281	0.756238
4	11.54	150	1102	1106	1104	2.3	2.1	28.2	0.618	25	91.56	15	1	0.508597	9.80446	95.0684	1.5391	0.266281	1.03051
5	11.54	150	1102	1106	1104	2.3	2.1	28.2	0.618	25	91.56	15	1	0.508597	9.80446	95.0684	1.32075	0.266281	0.812157
6	11.54	150	1102	1106	1104	2.3	2.1	28.2	0.618	25	91.56	15	1	0.508597	9.80446	95.0684	1.1956	0.266281	0.687005
1	11.54	150	1123.1	1126.1	1124.6	2.1	1.3	25.6	0.252	25	139.16	23	1	0.128384	2.47491	95.0684	0.543782	0.0672165	0.415398
2	11.54	150	1123.1	1126.1	1124.6	2.1	1.3	25.6	0.252	25	139.16	23	1	0.128384	2.47491	95.0684	0.539077	0.0672165	0.410693
3	11.54	150	1123.1	1126.1	1124.6	2.1	1.3	25.6	0.252	25	139.16	23	1	0.128384	2.47491	95.0684	0.319279	0.0672165	0.190895
4	11.54	150	1123.1	1126.1	1124.6	2.1	1.3	25.6	0.252	25	139.16	23	1	0.128384	2.47491	95.0684	0.388512	0.0672165	0.260128
5	11.54	150	1123.1	1126.1	1124.6	2.1	1.3	25.6	0.252	25	139.16	23	1	0.128384	2.47491	95.0684	0.333394	0.0672165	0.20501
6	11.54	150	1123.1	1126.1	1124.6	2.1	1.3	25.6	0.252	25	139.16	23	1	0.128384	2.47491	95.0684	0.301802	0.0672165	0.173419
1	9.77	150	1040.5	1041.4	1040.95	0.9	0.9	29.5	0.443	33	91.56	15	1	0.300585	4.99058	94.3191	0.496182	0.143821	0.195596
2	9.77	150	1040.5	1041.4	1040.95	0.9	0.9	29.5	0.443	33	91.56	15	1	0.300585	4.99058	94.3191	0.386878	0.143821	0.0862925
1	9.77	150	1043.8	1048	1045.9	3.6	2.3	31.1	0.499	27	62.16	10	1	0.865267	14.3659	94.3191	1.42831	0.414003	0.563045
2	9.77	150	1043.8	1048	1045.9	3.6	2.3	31.1	0.499	27	62.16	10	1	0.865267	14.3659	94.3191	1.11367	0.414003	0.248402
1	9.4	125	906.1	910.7	908.4	4.4	3.2	32.1	1.276	23	49.84	8	1	0.24717	6.40615	96.285	2.21237	0.405196	1.9652
2	9.4	125	906.1	910.7	908.4	4.4	3.2	32.1	1.276	23	49.84	8	1	0.24717	6.40615	96.285	2.94983	0.405196	2.70266
3	9.4	125	906.1	910.7	908.4	4.4	3.2	32.1	1.276	23	49.84	8	1	0.24717	6.40615	96.285	2.59731	0.405196	2.35014
4	9.4	125	906.1	910.7	908.4	4.4	3.2	32.1	1.276	23	49.84	8	1	0.24717	6.40615	96.285	2.29341	0.405196	2.04624
5	9.4	125	906.1	910.7	908.4	4.4	3.2	32.1	1.276	23	49.84	8	1	0.24717	6.40615	96.285	1.98546	0.405196	1.73829
6	9.4	125	906.1	910.7	908.4	4.4	3.2	32.1	1.276	23	49.84	8	1	0.24717	6.40615	96.285	2.40686	0.405196	2.15969
1	9.4	125	912.2	914.3	913.25	1.8	0.7	31	0.556	23	91	15	1	0.0235596	0.610617	96.285	0.210877	0.0386222	0.187318
2	9.4	125	912.2	914.3	913.25	1.8	0.7	31	0.556	23	91	15	1	0.0235596	0.610617	96.285	0.28117	0.0386222	0.25761
3	9.4	125	912.2	914.3	913.25	1.8	0.7	31	0.556	23	91	15	1	0.0235596	0.610617	96.285	0.247568	0.0386222	0.224009
4	9.4	125	912.2	914.3	913.25	1.8	0.7	31	0.556	23	91	15	1	0.0235596	0.610617	96.285	0.218602	0.0386222	0.195042
5	9.4	125	912.2	914.3	913.25	1.8	0.7	31	0.556	23	91	15	1	0.0235596	0.610617	96.285	0.189249	0.0386222	0.165689
6	9.4	125	912.2	914.3	913.25	1.8	0.7	31	0.556	23	91	15	1	0.0235596	0.610617	96.285	0.229416	0.0386222	0.205856
1	9.4	106	895	898.8	896.9	3	1.2	30.1	0.417	21	90.44	15	1	0.32681	3.2938	90.9736	0.707061	0.102771	0.380251
2	9.4	106	895	898.8	896.9	3	1.2	30.1	0.417	21	90.44	15	1	0.32681	3.2938	90.9736	1.27744	0.102771	0.950627
3	9.4	106	895	898.8	896.9	3	1.2	30.1	0.417	21	90.44	15	1	0.32681	3.2938	90.9736	0.668008	0.102771	0.341198
4	9.4	106	895	898.8	896.9	3	1.2	30.1	0.417	21	90.44	15	1	0.32681	3.2938	90.9736	1.34013	0.102771	1.01332
5	9.4	106	895	898.8	896.9	3	1.2	30.1	0.417	21	90.44	15	1	0.32681	3.2938	90.9736	1.63302	0.102771	1.30621
6	9.4	106	895	898.8	896.9	3	1.2	30.1	0.417	21	90.44	15	1	0.32681	3.2938	90.9736	1.84165	0.102771	1.51484
1	9.4	106	911	912.4	911.7	0.9	0.6	29.3	0.157	20	90.72	15	1	0.0615218	0.620055	90.9736	0.133104	0.0193465	0.071582
2	9.4	106	911	912.4	911.7	0.9	0.6	29.3	0.157	20	90.72	15	1	0.0615218	0.620055	90.9736	0.240477	0.0193465	0.178955
3	9.4	106	911	912.4	911.7	0.9	0.6	29.3	0.157	20	90.72	15	1	0.0615218	0.620055	90.9736	0.125752	0.0193465	0.0642304
4	9.4	106	911	912.4	911.7	0.9	0.6	29.3	0.157	20	90.72	15	1	0.0615218	0.620055	90.9736	0.252278	0.0193465	0.190756
5	9.4	106	911	912.4	911.7	0.9	0.6	29.3	0.157	20	90.72	15	1	0.0615218	0.620055	90.9736	0.307416	0.0193465	0.245894
6	9.4	106	911	912.4	911.7	0.9	0.6	29.3	0.157	20	90.72	15	1	0.0615218	0.620055	90.9736	0.346689	0.0193465	0.285167
1	9.4	106	919.8	923.3	921.55	3.5	1.3	29	0.208	19	90.72	15	1	0.176598	1.77986	90.9736	0.382073	0.0555339	0.205475
2	9.4	106	919.8	923.3	921.55	3.5	1.3	29	0.208	19	90.72	15	1	0.176598	1.77986	90.9736	0.690286	0.0555339	0.513688
3	9.4	106	919.8	923.3	921.55	3.5	1.3	29	0.208	19	90.72	15	1	0.176598	1.77986	90.9736	0.36097	0.0555339	0.184372
4	9.4	106	919.8	923.3	921.55	3.5	1.3	29	0.208	19	90.72	15	1	0.176598	1.77986	90.9736	0.724162	0.0555339	0.547564
5	9.4	106	919.8	923.3	921.55	3.5	1.3	29	0.208	19	90.72	15	1	0.176598	1.77986	90.9736	0.882433	0.0555339	0.705836
6	9.4	106	919.8	923.3	921.55	3.5	1.3	29	0.208	19	90.72	15	1	0.176598	1.77986	90.9736	0.995167	0.0555339	0.818569
1	9.02	125	948.2	949	948.6	0.8	0.2	30.4	0.11	20	91	15	1	0.0357751	0.280318	88.6821	0.0564331	0.00684037	0.0206579
2	9.02	125	948.2	949	948.6	0.8	0.2	30.4	0.11	20	91	15	1	0.0357751	0.280318	88.6821	0.0720291	0.00684037	0.036254
3	9.02	125	948.2	949	948.6	0.8	0.2	30.4	0.11	20	91	15	1	0.0357751	0.280318	88.6821	0.0731236	0.00684037	0.0373484
4	9.02	125	948.2	949	948.6	0.8	0.2	30.4	0.11	20	91	15	1	0.0357751	0.280318	88.6821	0.0930974	0.00684037	0.0573223
5	9.02	125	948.2	949	948.6	0.8	0.2	30.4	0.11	20	91	15	1	0.0357751	0.280318	88.6821	0.0969281	0.00684037	0.0611529
1	9.02	125	950.7	952.3	951.5	1.6	0.4	29	0.109	25	91	15	1	0.0708998	0.55554	88.6821	0.11184	0.0135564	0.0409402
2	9.02	125	950.7	952.3	951.5	1.6	0.4	29	0.109	25	91	15	1	0.0708998	0.55554	88.6821	0.142749	0.0135564	0.0718488
3	9.02	125	950.7	952.3	951.5	1.6	0.4	29	0.109	25	91	15	1	0.0708998	0.55554	88.6821	0.144918	0.0135564	0.0740178
4	9.02	125	950.7	952.3	951.5	1.6	0.4	29	0.109	25	91	15	1	0.0708998	0.55554	88.6821	0.184502	0.0135564	0.113602
5	9.02	125	950.7	952.3	951.5	1.6	0.4	29	0.109	25	91	15	1	0.0708998	0.55554	88.6821	0.192094	0.0135564	0.121194
1	9.02	125	969.2	972.1	970.65	1.7	0.4	30.4	0.162	21	91.28	15	1	0.105374	0.825665	88.6821	0.166221	0.020148	0.060847
2	9.02	125	969.2	972.1	970.65	1.7	0.4	30.4	0.162	21	91.28	15	1	0.105374	0.825665	88.6821	0.212158	0.020148	0.106784
3	9.02	125	969.2	972.1	970.65	1.7	0.4	30.4	0.162	21	91.28	15	1	0.105374	0.825665	88.6821	0.215382	0.020148	0.110008
4	9.02	125	969.2	972.1	970.65	1.7	0.4	30.4	0.162	21	91.28	15	1	0.105374	0.825665	88.6821	0.274214	0.020148	0.16884
5	9.02	125	969.2	972.1	970.65	1.7	0.4	30.4	0.162	21	91.28	15	1	0.105374	0.825665	88.6821	0.285497	0.020148	0.180123
1	9.02	125	985.5	989.7	987.6	2.2	0.9	30	0.614	20	91.28	15	1	0.898606	7.04109	88.6821	1.4175	0.171818	0.518889
2	9.02	125	985.5	989.7	987.6	2.2	0.9	30	0.614	20	91.28	15	1	0.898606	7.04109	88.6821	1.80924	0.171818	0.910634
3	9.02	125	985.5	989.7	987.6	2.2	0.9	30	0.614	20	91.28	15	1	0.898606	7.04109	88.6821	1.83673	0.171818	0.938124
4	9.02	125	985.5	989.7	987.6	2.2	0.9	30	0.614	20	91.28	15	1	0.898606	7.04109	88.6821	2.33844	0.171818	1.43983
5	9.02	125	985.5	989.7	987.6	2.2	0.9	30	0.614	20	91.28	15	1	0.898606	7.04109	88.6821	2.43466	0.171818	1.53605
1	11.54	150	1125	1129.2	1127.1	1.4	0.3	27.6	0.289	27	144.2	24	1	0.0579582	1.12338	95.0938	0.179709	0.0388981	0.121751
2	11.54	150	1125	1129.2	1127.1	1.4	0.3	27.6	0.289	27	144.2	24	1	0.0579582	1.12338	95.0938	0.177375	0.0388981	0.119417
3	11.54	150	1125	1129.2	1127.1	1.4	0.3	27.6	0.289	27	144.2	24	1	0.0579582	1.12338	95.0938	0.157926	0.0388981	0.0999681
4	11.54	150	1125	1129.2	1127.1	1.4	0.3	27.6	0.289	27	144.2	24	1	0.0579582	1.12338	95.0938	0.123696	0.0388981	0.0657378
5	11.54	150	1125	1129.2	1127.1	1.4	0.3	27.6	0.289	27	144.2	24	1	0.0579582	1.12338	95.0938	0.0925775	0.0388981	0.0346193
6	11.54	150	1125	1129.2	1127.1	1.4	0.3	27.6	0.289	27	144.2	24	1	0.0579582	1.12338	95.0938	0.110082	0.0388981	0.0521235
1	11.54	150	1132.9	1134.7	1133.8	1.1	0.7	29.7	0.482	26	144.2	24	1	0.225549	4.37171	95.0938	0.699353	0.151375	0.473804
2	11.54	150	1132.9	1134.7	1133.8	1.1	0.7	29.7	0.482	26	144.2	24	1	0.225549	4.37171	95.0938	0.690271	0.151375	0.464722
3	11.54	150	1132.9	1134.7	1133.8	1.1	0.7	29.7	0.482	26	144.2	24	1	0.225549	4.37171	95.0938	0.614583	0.151375	0.389034
4	11.54	150	1132.9	1134.7	1133.8	1.1	0.7	29.7	0.482	26	144.2	24	1	0.225549	4.37171	95.0938	0.481373	0.151375	0.255824
5	11.54	150	1132.9	1134.7	1133.8	1.1	0.7	29.7	0.482	26	144.2	24	1	0.225549	4.37171	95.0938	0.360273	0.151375	0.134724
6	11.54	150	1132.9	1134.7	1133.8	1.1	0.7	29.7	0.482	26	144.2	24	1	0.225549	4.37171	95.0938	0.428392	0.151375	0.202843
1	11.54	150	1141.2	1144.5	1142.85	3.3	2.5	30.3	0.564	21	53.76	8.5	1	0.942573	18.2695	95.0938	2.92261	0.632599	1.98003
2	11.54	150	1141.2	1144.5	1142.85	3.3	2.5	30.3	0.564	21	53.76	8.5	1	0.942573	18.2695	95.0938	2.88465	0.632599	1.94208
3	11.54	150	1141.2	1144.5	1142.85	3.3	2.5	30.3	0.564	21	53.76	8.5	1	0.942573	18.2695	95.0938	2.56835	0.632599	1.62578
4	11.54	150	1141.2	1144.5	1142.85	3.3	2.5	30.3	0.564	21	53.76	8.5	1	0.942573	18.2695	95.0938	2.01166	0.632599	1.06909
5	11.54	150	1141.2	1144.5	1142.85	3.3	2.5	30.3	0.564	21	53.76	8.5	1	0.942573	18.2695	95.0938	1.50559	0.632599	0.563013
6	11.54	150	1141.2	1144.5	1142.85	3.3	2.5	30.3	0.564	21	53.76	8.5	1	0.942573	18.2695	95.0938	1.79026	0.632599	0.847683
1	11.54	150	1148	1154.5	1151.25	5.7	0.8	29.4	0.346	21	144.2	24	1	0.185038	3.58652	95.0938	0.573743	0.124187	0.388705
2	11.54	150	1148	1154.5	1151.25	5.7	0.8	29.4	0.346	21	144.2	24	1	0.185038	3.58652	95.0938	0.566292	0.124187	0.381254
3	11.54	150	1148	1154.5	1151.25	5.7	0.8	29.4	0.346	21	144.2	24	1	0.185038	3.58652	95.0938	0.504198	0.124187	0.31916
4	11.54	150	1148	1154.5	1151.25	5.7	0.8	29.4	0.346	21	144.2	24	1	0.185038	3.58652	95.0938	0.394914	0.124187	0.209876
5	11.54	150	1148	1154.5	1151.25	5.7	0.8	29.4	0.346	21	144.2	24	1	0.185038	3.58652	95.0938	0.295565	0.124187	0.110526
6	11.54	150	1148	1154.5	1151.25	5.7	0.8	29.4	0.346	21	144.2	24	1	0.185038	3.58652	95.0938	0.351449	0.124187	0.16641
1	11.54	150	1155.9	1156.4	1156.15	0.5	0.5	27.7	0.236	31	115.08	19	1	0.078882	1.52893	95.0938	0.244587	0.0529409	0.165705
2	11.54	150	1155.9	1156.4	1156.15	0.5	0.5	27.7	0.236	31	115.08	19	1	0.078882	1.52893	95.0938	0.241411	0.0529409	0.162529
3	11.54	150	1155.9	1156.4	1156.15	0.5	0.5	27.7	0.236	31	115.08	19	1	0.078882	1.52893	95.0938	0.21494	0.0529409	0.136058
4	11.54	150	1155.9	1156.4	1156.15	0.5	0.5	27.7	0.236	31	115.08	19	1	0.078882	1.52893	95.0938	0.168352	0.0529409	0.0894701
5	11.54	150	1155.9	1156.4	1156.15	0.5	0.5	27.7	0.236	31	115.08	19	1	0.078882	1.52893	95.0938	0.125999	0.0529409	0.0471174
6	11.54	150	1155.9	1156.4	1156.15	0.5	0.5	27.7	0.236	31	115.08	19	1	0.078882	1.52893	95.0938	0.149823	0.0529409	0.0709408
1	10.3	150	1059.5	1061.1	1060.3	1.6	0.4	27.6	0.151	20	91.56	15	1	0.00245706	0.481471	99.4923	0.0154124	0.0111684	0.0129554
2	10.3	150	1059.5	1061.1	1060.3	1.6	0.4	27.6	0.151	20	91.56	15	1	0.00245706	0.481471	99.4923	0.0214434	0.0111684	0.0189863
3	10.3	150	1059.5	1061.1	1060.3	1.6	0.4	27.6	0.151	20	91.56	15	1	0.00245706	0.481471	99.4923	0.0142956	0.0111684	0.0118385
4	10.3	150	1059.5	1061.1	1060.3	1.6	0.4	27.6	0.151	20	91.56	15	1	0.00245706	0.481471	99.4923	0.0139605	0.0111684	0.0115035
5	10.3	150	1059.5	1061.1	1060.3	1.6	0.4	27.6	0.151	20	91.56	15	1	0.00245706	0.481471	99.4923	0.0163059	0.0111684	0.0138489
6	10.3	150	1059.5	1061.1	1060.3	1.6	0.4	27.6	0.151	20	91.56	15	1	0.00245706	0.481471	99.4923	0.02122	0.0111684	0.018763
1	10.3	150	1069.4	1077.3	1073.35	7.3	5	30.5	0.695	20	53.48	8.5	1	0.141362	27.7005	99.4923	0.886725	0.642555	0.745363
2	10.3	150	1069.4	1077.3	1073.35	7.3	5	30.5	0.695	20	53.48	8.5	1	0.141362	27.7005	99.4923	1.2337	0.642555	1.09234
3	10.3	150	1069.4	1077.3	1073.35	7.3	5	30.5	0.695	20	53.48	8.5	1	0.141362	27.7005	99.4923	0.82247	0.642555	0.681108
4	10.3	150	1069.4	1077.3	1073.35	7.3	5	30.5	0.695	20	53.48	8.5	1	0.141362	27.7005	99.4923	0.803193	0.642555	0.661831
5	10.3	150	1069.4	1077.3	1073.35	7.3	5	30.5	0.695	20	53.48	8.5	1	0.141362	27.7005	99.4923	0.93813	0.642555	0.796768
6	10.3	150	1069.4	1077.3	1073.35	7.3	5	30.5	0.695	20	53.48	8.5	1	0.141362	27.7005	99.4923	1.22085	0.642555	1.07949
1	10.3	150	1078.5	1080.3	1079.4	1.8	1.5	30.4	0.365	18	148.92	24	1	0.0222721	4.36433	99.4923	0.139707	0.101237	0.117435
2	10.3	150	1078.5	1080.3	1079.4	1.8	1.5	30.4	0.365	18	148.92	24	1	0.0222721	4.36433	99.4923	0.194375	0.101237	0.172103
3	10.3	150	1078.5	1080.3	1079.4	1.8	1.5	30.4	0.365	18	148.92	24	1	0.0222721	4.36433	99.4923	0.129583	0.101237	0.107311
4	10.3	150	1078.5	1080.3	1079.4	1.8	1.5	30.4	0.365	18	148.92	24	1	0.0222721	4.36433	99.4923	0.126546	0.101237	0.104274
5	10.3	150	1078.5	1080.3	1079.4	1.8	1.5	30.4	0.365	18	148.92	24	1	0.0222721	4.36433	99.4923	0.147806	0.101237	0.125534
6	10.3	150	1078.5	1080.3	1079.4	1.8	1.5	30.4	0.365	18	148.92	24	1	0.0222721	4.36433	99.4923	0.19235	0.101237	0.170078
1	10.3	150	1089	1091.5	1090.25	2.5	2.1	31.3	0.607	28	65.24	10.5	1	0.0518544	10.1611	99.4923	0.325269	0.235702	0.273414
2	10.3	150	1089	1091.5	1090.25	2.5	2.1	31.3	0.607	28	65.24	10.5	1	0.0518544	10.1611	99.4923	0.452548	0.235702	0.400693
3	10.3	150	1089	1091.5	1090.25	2.5	2.1	31.3	0.607	28	65.24	10.5	1	0.0518544	10.1611	99.4923	0.301699	0.235702	0.249844
4	10.3	150	1089	1091.5	1090.25	2.5	2.1	31.3	0.607	28	65.24	10.5	1	0.0518544	10.1611	99.4923	0.294628	0.235702	0.242773
5	10.3	150	1089	1091.5	1090.25	2.5	2.1	31.3	0.607	28	65.24	10.5	1	0.0518544	10.1611	99.4923	0.344125	0.235702	0.29227
6	10.3	150	1089	1091.5	1090.25	2.5	2.1	31.3	0.607	28	65.24	10.5	1	0.0518544	10.1611	99.4923	0.447834	0.235702	0.395979
1	9.28	150	1015.3	1018	1016.65	2	1.2	29.4	0.252	28	114.52	19	1	0.632307	4.49011	87.6561	1.3335	0.246034	0.701196
2	9.28	150	1015.3	1018	1016.65	2	1.2	29.4	0.252	28	114.52	19	1	0.632307	4.49011	87.6561	0.720879	0.246034	0.0885721
3	9.28	150	1015.3	1018	1016.65	2	1.2	29.4	0.252	28	114.52	19	1	0.632307	4.49011	87.6561	0.693815	0.246034	0.0615084
1	9.28	150	1020	1021	1020.5	1	0.9	29.3	0.252	32	91.28	15	1	0.47423	3.36759	87.6561	1.00013	0.184525	0.525897
2	9.28	150	1020	1021	1020.5	1	0.9	29.3	0.252	32	91.28	15	1	0.47423	3.36759	87.6561	0.540659	0.184525	0.0664291
3	9.28	150	1020	1021	1020.5	1	0.9	29.3	0.252	32	91.28	15	1	0.47423	3.36759	87.6561	0.520361	0.184525	0.0461313
1	9.96	106	964.7	965.7	965.2	1	0.3	31	0.482	43	310	45	1	0.0633164	1.28152	95.2919	0.12683	0.0197247	0.0635136
2	9.96	106	964.7	965.7	965.2	1	0.3	31	0.482	43	310	45	1	0.0633164	1.28152	95.2919	0.148133	0.0197247	0.0848163
3	9.96	106	964.7	965.7	965.2	1	0.3	31	0.482	43	310	45	1	0.0633164	1.28152	95.2919	0.102569	0.0197247	0.0392522
4	9.96	106	964.7	965.7	965.2	1	0.3	31	0.482	43	310	45	1	0.0633164	1.28152	95.2919	0.0950732	0.0197247	0.0317568
5	9.96	106	964.7	965.7	965.2	1	0.3	31	0.482	43	310	45	1	0.0633164	1.28152	95.2919	0.102174	0.0197247	0.0388577
6	9.96	106	964.7	965.7	965.2	1	0.3	31	0.482	43	310	45	1	0.0633164	1.28152	95.2919	0.128408	0.0197247	0.0650916
1	9.96	106	970.9	977	973.95	6.1	5.3	31.7	1.211	42	335	50	1	2.8104	56.8821	95.2919	5.62955	0.875513	2.81915
2	9.96	106	970.9	977	973.95	6.1	5.3	31.7	1.211	42	335	50	1	2.8104	56.8821	95.2919	6.5751	0.875513	3.76471
3	9.96	106	970.9	977	973.95	6.1	5.3	31.7	1.211	42	335	50	1	2.8104	56.8821	95.2919	4.55267	0.875513	1.74227
4	9.96	106	970.9	977	973.95	6.1	5.3	31.7	1.211	42	335	50	1	2.8104	56.8821	95.2919	4.21997	0.875513	1.40958
5	9.96	106	970.9	977	973.95	6.1	5.3	31.7	1.211	42	335	50	1	2.8104	56.8821	95.2919	4.53516	0.875513	1.72476
6	9.96	106	970.9	977	973.95	6.1	5.3	31.7	1.211	42	335	50	1	2.8104	56.8821	95.2919	5.69959	0.875513	2.88919
1	9.87	175	975.8	982.6	979.2	6.7	1.3	28.8	0.387	28	73.68	12	1	0.59698	11.5385	95.0807	1.49591	0.230494	0.898928
2	9.87	175	975.8	982.6	979.2	6.7	1.3	28.8	0.387	28	73.68	12	1	0.59698	11.5385	95.0807	1.14325	0.230494	0.546272
3	9.87	175	975.8	982.6	979.2	6.7	1.3	28.8	0.387	28	73.68	12	1	0.59698	11.5385	95.0807	1.00496	0.230494	0.407975
4	9.87	175	975.8	982.6	979.2	6.7	1.3	28.8	0.387	28	73.68	12	1	0.59698	11.5385	95.0807	1.09024	0.230494	0.493258
5	9.87	175	975.8	982.6	979.2	6.7	1.3	28.8	0.387	28	73.68	12	1	0.59698	11.5385	95.0807	1.22392	0.230494	0.626945
6	9.87	175	975.8	982.6	979.2	6.7	1.3	28.8	0.387	28	73.68	12	1	0.59698	11.5385	95.0807	1.00726	0.230494	0.41028
1	9.87	175	1001	1003.2	1002.1	2.2	1.9	29	0.407	28	38.64	6	1	0.917601	17.7356	95.0807	2.29932	0.354286	1.38172
2	9.87	175	1001	1003.2	1002.1	2.2	1.9	29	0.407	28	38.64	6	1	0.917601	17.7356	95.0807	1.75726	0.354286	0.839658
3	9.87	175	1001	1003.2	1002.1	2.2	1.9	29	0.407	28	38.64	6	1	0.917601	17.7356	95.0807	1.54469	0.354286	0.627086
4	9.87	175	1001	1003.2	1002.1	2.2	1.9	29	0.407	28	38.64	6	1	0.917601	17.7356	95.0807	1.67577	0.354286	0.758172
5	9.87	175	1001	1003.2	1002.1	2.2	1.9	29	0.407	28	38.64	6	1	0.917601	17.7356	95.0807	1.88126	0.354286	0.963658
6	9.87	175	1001	1003.2	1002.1	2.2	1.9	29	0.407	28	38.64	6	1	0.917601	17.7356	95.0807	1.54823	0.354286	0.630629
1	9.87	175	1005.1	1007.6	1006.35	2	0.9	31.3	1.007	29	38.64	6	1	1.07542	20.7859	95.0807	2.69478	0.41522	1.61936
2	9.87	175	1005.1	1007.6	1006.35	2	0.9	31.3	1.007	29	38.64	6	1	1.07542	20.7859	95.0807	2.05949	0.41522	0.984071
3	9.87	175	1005.1	1007.6	1006.35	2	0.9	31.3	1.007	29	38.64	6	1	1.07542	20.7859	95.0807	1.81036	0.41522	0.734939
4	9.87	175	1005.1	1007.6	1006.35	2	0.9	31.3	1.007	29	38.64	6	1	1.07542	20.7859	95.0807	1.96399	0.41522	0.88857
5	9.87	175	1005.1	1007.6	1006.35	2	0.9	31.3	1.007	29	38.64	6	1	1.07542	20.7859	95.0807	2.20482	0.41522	1.1294
6	9.87	175	1005.1	1007.6	1006.35	2	0.9	31.3	1.007	29	38.64	6	1	1.07542	20.7859	95.0807	1.81451	0.41522	0.739091
1	10.64	150	1102.2	1105	1103.6	2.5	1	27	0.211	21	114.8	19	1	0.322291	4.94516	93.8815	1.16495	0.16786	0.842657
2	10.64	150	1102.2	1105	1103.6	2.5	1	27	0.211	21	114.8	19	1	0.322291	4.94516	93.8815	0.513652	0.16786	0.19136
3	10.64	150	1102.2	1105	1103.6	2.5	1	27	0.211	21	114.8	19	1	0.322291	4.94516	93.8815	0.394471	0.16786	0.0721798
4	10.64	150	1102.2	1105	1103.6	2.5	1	27	0.211	21	114.8	19	1	0.322291	4.94516	93.8815	0.365935	0.16786	0.0436436
5	10.64	150	1102.2	1105	1103.6	2.5	1	27	0.211	21	114.8	19	1	0.322291	4.94516	93.8815	0.374328	0.16786	0.0520366
1	10.64	150	1110.3	1115.6	1112.95	1.5	0.6	26.7	0.206	21	114.8	19	1	0.188792	2.89678	93.8815	0.682406	0.0983294	0.493613
2	10.64	150	1110.3	1115.6	1112.95	1.5	0.6	26.7	0.206	21	114.8	19	1	0.188792	2.89678	93.8815	0.300888	0.0983294	0.112095
3	10.64	150	1110.3	1115.6	1112.95	1.5	0.6	26.7	0.206	21	114.8	19	1	0.188792	2.89678	93.8815	0.231074	0.0983294	0.0422816
4	10.64	150	1110.3	1115.6	1112.95	1.5	0.6	26.7	0.206	21	114.8	19	1	0.188792	2.89678	93.8815	0.214358	0.0983294	0.0255656
5	10.64	150	1110.3	1115.6	1112.95	1.5	0.6	26.7	0.206	21	114.8	19	1	0.188792	2.89678	93.8815	0.219274	0.0983294	0.0304821
1	10.64	150	1126	1128.4	1127.2	1.5	1.4	28.2	0.488	25	91.56	15	1	1.04355	16.012	93.8815	3.772	0.543516	2.72845
2	10.64	150	1126	1128.4	1127.2	1.5	1.4	28.2	0.488	25	91.56	15	1	1.04355	16.012	93.8815	1.66316	0.543516	0.619609
3	10.64	150	1126	1128.4	1127.2	1.5	1.4	28.2	0.488	25	91.56	15	1	1.04355	16.012	93.8815	1.27726	0.543516	0.233712
4	10.64	150	1126	1128.4	1127.2	1.5	1.4	28.2	0.488	25	91.56	15	1	1.04355	16.012	93.8815	1.18487	0.543516	0.141314
5	10.64	150	1126	1128.4	1127.2	1.5	1.4	28.2	0.488	25	91.56	15	1	1.04355	16.012	93.8815	1.21204	0.543516	0.16849
1	10.64	150	1069.7	1071.1	1070.4	1.4	1.1	27	0.246	36	91.56	15	1	0.0547281	3.80664	98.5827	0.436811	0.101348	0.382083
2	10.64	150	1069.7	1071.1	1070.4	1.4	1.1	27	0.246	36	91.56	15	1	0.0547281	3.80664	98.5827	0.278708	0.101348	0.22398
3	10.64	150	1069.7	1071.1	1070.4	1.4	1.1	27	0.246	36	91.56	15	1	0.0547281	3.80664	98.5827	0.154049	0.101348	0.0993213
4	10.64	150	1069.7	1071.1	1070.4	1.4	1.1	27	0.246	36	91.56	15	1	0.0547281	3.80664	98.5827	0.18344	0.101348	0.128712
5	10.64	150	1069.7	1071.1	1070.4	1.4	1.1	27	0.246	36	91.56	15	1	0.0547281	3.80664	98.5827	0.219926	0.101348	0.165198
6	10.64	150	1069.7	1071.1	1070.4	1.4	1.1	27	0.246	36	91.56	15	1	0.0547281	3.80664	98.5827	0.215872	0.101348	0.161144
1	10.64	150	1083.7	1085	1084.35	1.3	0.6	28.2	0.357	25	91.56	15	1	0.0433213	3.01324	98.5827	0.345769	0.0802247	0.302447
2	10.64	150	1083.7	1085	1084.35	1.3	0.6	28.2	0.357	25	91.56	15	1	0.0433213	3.01324	98.5827	0.220618	0.0802247	0.177297
3	10.64	150	1083.7	1085	1084.35	1.3	0.6	28.2	0.357	25	91.56	15	1	0.0433213	3.01324	98.5827	0.121942	0.0802247	0.0786202
4	10.64	150	1083.7	1085	1084.35	1.3	0.6	28.2	0.357	25	91.56	15	1	0.0433213	3.01324	98.5827	0.145207	0.0802247	0.101885
5	10.64	150	1083.7	1085	1084.35	1.3	0.6	28.2	0.357	25	91.56	15	1	0.0433213	3.01324	98.5827	0.174088	0.0802247	0.130766
6	10.64	150	1083.7	1085	1084.35	1.3	0.6	28.2	0.357	25	91.56	15	1	0.0433213	3.01324	98.5827	0.170879	0.0802247	0.127557
1	10.64	150	1099.8	1101.9	1100.85	1.4	0.4	26.6	0.209	23	70.84	11.5	1	0.0169079	1.17604	98.5827	0.13495	0.0313109	0.118042
2	10.64	150	1099.8	1101.9	1100.85	1.4	0.4	26.6	0.209	23	70.84	11.5	1	0.0169079	1.17604	98.5827	0.0861049	0.0313109	0.069197
3	10.64	150	1099.8	1101.9	1100.85	1.4	0.4	26.6	0.209	23	70.84	11.5	1	0.0169079	1.17604	98.5827	0.0475925	0.0313109	0.0306846
4	10.64	150	1099.8	1101.9	1100.85	1.4	0.4	26.6	0.209	23	70.84	11.5	1	0.0169079	1.17604	98.5827	0.0566727	0.0313109	0.0397648
5	10.64	150	1099.8	1101.9	1100.85	1.4	0.4	26.6	0.209	23	70.84	11.5	1	0.0169079	1.17604	98.5827	0.0679446	0.0313109	0.0510367
6	10.64	150	1099.8	1101.9	1100.85	1.4	0.4	26.6	0.209	23	70.84	11.5	1	0.0169079	1.17604	98.5827	0.0666921	0.0313109	0.0497843
1	11.54	150	1113.6	1115.4	1114.5	1.8	1.8	29.6	0.609	24	53.48	8.5	1	0.514777	9.53947	94.88	3.08637	0.229811	2.57159
2	11.54	150	1113.6	1115.4	1114.5	1.8	1.8	29.6	0.609	24	53.48	8.5	1	0.514777	9.53947	94.88	1.92352	0.229811	1.40874
3	11.54	150	1113.6	1115.4	1114.5	1.8	1.8	29.6	0.609	24	53.48	8.5	1	0.514777	9.53947	94.88	1.75806	0.229811	1.24328
4	11.54	150	1113.6	1115.4	1114.5	1.8	1.8	29.6	0.609	24	53.48	8.5	1	0.514777	9.53947	94.88	0.848004	0.229811	0.333226
5	11.54	150	1113.6	1115.4	1114.5	1.8	1.8	29.6	0.609	24	53.48	8.5	1	0.514777	9.53947	94.88	0.788253	0.229811	0.273475
6	11.54	150	1113.6	1115.4	1114.5	1.8	1.8	29.6	0.609	24	53.48	8.5	1	0.514777	9.53947	94.88	0.845706	0.229811	0.330928
1	11.54	150	1120.2	1124.8	1122.5	4.6	3.6	29.5	0.65	25	53.48	8.5	1	1.09887	20.3634	94.88	6.5883	0.490566	5.48943
2	11.54	150	1120.2	1124.8	1122.5	4.6	3.6	29.5	0.65	25	53.48	8.5	1	1.09887	20.3634	94.88	4.10604	0.490566	3.00717
3	11.54	150	1120.2	1124.8	1122.5	4.6	3.6	29.5	0.65	25	53.48	8.5	1	1.09887	20.3634	94.88	3.75283	0.490566	2.65396
4	11.54	150	1120.2	1124.8	1122.5	4.6	3.6	29.5	0.65	25	53.48	8.5	1	1.09887	20.3634	94.88	1.81019	0.490566	0.711321
5	11.54	150	1120.2	1124.8	1122.5	4.6	3.6	29.5	0.65	25	53.48	8.5	1	1.09887	20.3634	94.88	1.68264	0.490566	0.583774
6	11.54	150	1120.2	1124.8	1122.5	4.6	3.6	29.5	0.65	25	53.48	8.5	1	1.09887	20.3634	94.88	1.80528	0.490566	0.706415
1	10.24	150	1067	1068.2	1067.6	1.2	0.8	28.8	0.3	27	53.48	8.5	1	0.0276232	6.03798	99.5446	0.568579	0.230194	0.540955
2	10.24	150	1067	1068.2	1067.6	1.2	0.8	28.8	0.3	27	53.48	8.5	1	0.0276232	6.03798	99.5446	0.283138	0.230194	0.255515
3	10.24	150	1067	1068.2	1067.6	1.2	0.8	28.8	0.3	27	53.48	8.5	1	0.0276232	6.03798	99.5446	0.179551	0.230194	0.151928
4	10.24	150	1067	1068.2	1067.6	1.2	0.8	28.8	0.3	27	53.48	8.5	1	0.0276232	6.03798	99.5446	0.168041	0.230194	0.140418
5	10.24	150	1067	1068.2	1067.6	1.2	0.8	28.8	0.3	27	53.48	8.5	1	0.0276232	6.03798	99.5446	0.158834	0.230194	0.13121
6	10.24	150	1067	1068.2	1067.6	1.2	0.8	28.8	0.3	27	53.48	8.5	1	0.0276232	6.03798	99.5446	0.105889	0.230194	0.0782659
1	10.24	150	1078.7	1082.2	1080.45	2.6	1	28.8	0.326	24	53.48	8.5	1	0.0375216	8.20159	99.5446	0.772319	0.31268	0.734798
2	10.24	150	1078.7	1082.2	1080.45	2.6	1	28.8	0.326	24	53.48	8.5	1	0.0375216	8.20159	99.5446	0.384596	0.31268	0.347075
3	10.24	150	1078.7	1082.2	1080.45	2.6	1	28.8	0.326	24	53.48	8.5	1	0.0375216	8.20159	99.5446	0.24389	0.31268	0.206369
4	10.24	150	1078.7	1082.2	1080.45	2.6	1	28.8	0.326	24	53.48	8.5	1	0.0375216	8.20159	99.5446	0.228256	0.31268	0.190735
5	10.24	150	1078.7	1082.2	1080.45	2.6	1	28.8	0.326	24	53.48	8.5	1	0.0375216	8.20159	99.5446	0.215749	0.31268	0.178228
6	10.24	150	1078.7	1082.2	1080.45	2.6	1	28.8	0.326	24	53.48	8.5	1	0.0375216	8.20159	99.5446	0.143833	0.31268	0.106311
1	10.24	150	1091.4	1092.6	1092	1.2	1.1	27.9	0.181	30	91.28	15	1	0.0229158	5.00901	99.5446	0.471683	0.190965	0.448768
2	10.24	150	1091.4	1092.6	1092	1.2	1.1	27.9	0.181	30	91.28	15	1	0.0229158	5.00901	99.5446	0.234887	0.190965	0.211971
3	10.24	150	1091.4	1092.6	1092	1.2	1.1	27.9	0.181	30	91.28	15	1	0.0229158	5.00901	99.5446	0.148953	0.190965	0.126037
4	10.24	150	1091.4	1092.6	1092	1.2	1.1	27.9	0.181	30	91.28	15	1	0.0229158	5.00901	99.5446	0.139404	0.190965	0.116489
5	10.24	150	1091.4	1092.6	1092	1.2	1.1	27.9	0.181	30	91.28	15	1	0.0229158	5.00901	99.5446	0.131766	0.190965	0.10885
6	10.24	150	1091.4	1092.6	1092	1.2	1.1	27.9	0.181	30	91.28	15	1	0.0229158	5.00901	99.5446	0.0878439	0.190965	0.0649281
1	10.13	150	942.7	946.1	944.4	2.6	1	27.4	0.28	28	114.72	19	1	0.0185829	0.738191	97.5445	0.0698462	0.0640791	0.0512633
2	10.13	150	942.7	946.1	944.4	2.6	1	27.4	0.28	28	114.72	19	1	0.0185829	0.738191	97.5445	0.0621567	0.0640791	0.0435738
3	10.13	150	942.7	946.1	944.4	2.6	1	27.4	0.28	28	114.72	19	1	0.0185829	0.738191	97.5445	0.0531856	0.0640791	0.0346027
4	10.13	150	942.7	946.1	944.4	2.6	1	27.4	0.28	28	114.72	19	1	0.0185829	0.738191	97.5445	0.0487001	0.0640791	0.0301172
5	10.13	150	942.7	946.1	944.4	2.6	1	27.4	0.28	28	114.72	19	1	0.0185829	0.738191	97.5445	0.0378067	0.0640791	0.0192237
6	10.13	150	942.7	946.1	944.4	2.6	1	27.4	0.28	28	114.72	19	1	0.0185829	0.738191	97.5445	0.0557488	0.0640791	0.0371659
1	10.13	150	950	955.7	952.85	5.2	2.7	30.1	0.483	28	53.04	8.5	1	0.08655	3.43813	97.5445	0.325309	0.298448	0.238759
2	10.13	150	950	955.7	952.85	5.2	2.7	30.1	0.483	28	53.04	8.5	1	0.08655	3.43813	97.5445	0.289495	0.298448	0.202945
3	10.13	150	950	955.7	952.85	5.2	2.7	30.1	0.483	28	53.04	8.5	1	0.08655	3.43813	97.5445	0.247712	0.298448	0.161162
4	10.13	150	950	955.7	952.85	5.2	2.7	30.1	0.483	28	53.04	8.5	1	0.08655	3.43813	97.5445	0.226821	0.298448	0.140271
5	10.13	150	950	955.7	952.85	5.2	2.7	30.1	0.483	28	53.04	8.5	1	0.08655	3.43813	97.5445	0.176085	0.298448	0.0895345
6	10.13	150	950	955.7	952.85	5.2	2.7	30.1	0.483	28	53.04	8.5	1	0.08655	3.43813	97.5445	0.25965	0.298448	0.1731
1	10.08	150	945.5	951.2	948.35	4.1	3	32.5	0.619	23	52.8	8.5	1	1.50886	10.4741	87.4083	2.54163	0.366229	1.03277
2	10.08	150	945.5	951.2	948.35	4.1	3	32.5	0.619	23	52.8	8.5	1	1.50886	10.4741	87.4083	2.86025	0.366229	1.35138
3	10.08	150	945.5	951.2	948.35	4.1	3	32.5	0.619	23	52.8	8.5	1	1.50886	10.4741	87.4083	3.40227	0.366229	1.8934
4	10.08	150	945.5	951.2	948.35	4.1	3	32.5	0.619	23	52.8	8.5	1	1.50886	10.4741	87.4083	3.4865	0.366229	1.97764
5	10.08	150	945.5	951.2	948.35	4.1	3	32.5	0.619	23	52.8	8.5	1	1.50886	10.4741	87.4083	2.91518	0.366229	1.40632
6	10.08	150	945.5	951.2	948.35	4.1	3	32.5	0.619	23	52.8	8.5	1	1.50886	10.4741	87.4083	2.8456	0.366229	1.33674
1	10.08	150	954.3	956.5	955.4	2.2	0.2	27.2	0.047	22	114.24	19	1	0.00763775	0.0530194	87.4083	0.0128655	0.00185382	0.00522778
2	10.08	150	954.3	956.5	955.4	2.2	0.2	27.2	0.047	22	114.24	19	1	0.00763775	0.0530194	87.4083	0.0144784	0.00185382	0.00684061
3	10.08	150	954.3	956.5	955.4	2.2	0.2	27.2	0.047	22	114.24	19	1	0.00763775	0.0530194	87.4083	0.017222	0.00185382	0.00958427
4	10.08	150	954.3	956.5	955.4	2.2	0.2	27.2	0.047	22	114.24	19	1	0.00763775	0.0530194	87.4083	0.0176484	0.00185382	0.0100106
5	10.08	150	954.3	956.5	955.4	2.2	0.2	27.2	0.047	22	114.24	19	1	0.00763775	0.0530194	87.4083	0.0147564	0.00185382	0.00711868
6	10.08	150	954.3	956.5	955.4	2.2	0.2	27.2	0.047	22	114.24	19	1	0.00763775	0.0530194	87.4083	0.0144042	0.00185382	0.00676646
1	10.08	150	957.8	961.1	959.45	2.9	1.1	29.3	0.532	23	114.48	19	1	0.475491	3.30074	87.4083	0.800948	0.11541	0.325457
2	10.08	150	957.8	961.1	959.45	2.9	1.1	29.3	0.532	23	114.48	19	1	0.475491	3.30074	87.4083	0.901355	0.11541	0.425864
3	10.08	150	957.8	961.1	959.45	2.9	1.1	29.3	0.532	23	114.48	19	1	0.475491	3.30074	87.4083	1.07216	0.11541	0.596672
4	10.08	150	957.8	961.1	959.45	2.9	1.1	29.3	0.532	23	114.48	19	1	0.475491	3.30074	87.4083	1.09871	0.11541	0.623216
5	10.08	150	957.8	961.1	959.45	2.9	1.1	29.3	0.532	23	114.48	19	1	0.475491	3.30074	87.4083	0.918667	0.11541	0.443176
6	10.08	150	957.8	961.1	959.45	2.9	1.1	29.3	0.532	23	114.48	19	1	0.475491	3.30074	87.4083	0.896739	0.11541	0.421248
1	9.86	175	947.1	949.5	948.3	2	0.4	27.2	0.092	28	102.76	17	1	0.0095629	0.16548	94.5368	0.0202692	0.00519723	0.0107063
2	9.86	175	947.1	949.5	948.3	2	0.4	27.2	0.092	28	102.76	17	1	0.0095629	0.16548	94.5368	0.0228678	0.00519723	0.0133049
3	9.86	175	947.1	949.5	948.3	2	0.4	27.2	0.092	28	102.76	17	1	0.0095629	0.16548	94.5368	0.0226599	0.00519723	0.013097
4	9.86	175	947.1	949.5	948.3	2	0.4	27.2	0.092	28	102.76	17	1	0.0095629	0.16548	94.5368	0.0226599	0.00519723	0.013097
5	9.86	175	947.1	949.5	948.3	2	0.4	27.2	0.092	28	102.76	17	1	0.0095629	0.16548	94.5368	0.0226079	0.00519723	0.013045
6	9.86	175	947.1	949.5	948.3	2	0.4	27.2	0.092	28	102.76	17	1	0.0095629	0.16548	94.5368	0.0189179	0.00519723	0.00935501
1	9.86	175	974.8	978	976.4	3.2	1.1	28.9	0.833	28	105.84	17.5	1	0.238111	4.12035	94.5368	0.504692	0.129408	0.266581
2	9.86	175	974.8	978	976.4	3.2	1.1	28.9	0.833	28	105.84	17.5	1	0.238111	4.12035	94.5368	0.569396	0.129408	0.331285
3	9.86	175	974.8	978	976.4	3.2	1.1	28.9	0.833	28	105.84	17.5	1	0.238111	4.12035	94.5368	0.564219	0.129408	0.326108
4	9.86	175	974.8	978	976.4	3.2	1.1	28.9	0.833	28	105.84	17.5	1	0.238111	4.12035	94.5368	0.564219	0.129408	0.326108
5	9.86	175	974.8	978	976.4	3.2	1.1	28.9	0.833	28	105.84	17.5	1	0.238111	4.12035	94.5368	0.562925	0.129408	0.324814
6	9.86	175	974.8	978	976.4	3.2	1.1	28.9	0.833	28	105.84	17.5	1	0.238111	4.12035	94.5368	0.471046	0.129408	0.232935
1	8.68	175	953.7	955.4	954.55	1.7	1.5	29.8	0.466	29	91.28	15	1	0.114041	1.88568	94.2971	0.237525	0.0726377	0.123484
2	8.68	175	953.7	955.4	954.55	1.7	1.5	29.8	0.466	29	91.28	15	1	0.114041	1.88568	94.2971	0.212102	0.0726377	0.0980609
3	8.68	175	953.7	955.4	954.55	1.7	1.5	29.8	0.466	29	91.28	15	1	0.114041	1.88568	94.2971	0.215734	0.0726377	0.101693
4	8.68	175	953.7	955.4	954.55	1.7	1.5	29.8	0.466	29	91.28	15	1	0.114041	1.88568	94.2971	0.241157	0.0726377	0.127116
5	8.68	175	953.7	955.4	954.55	1.7	1.5	29.8	0.466	29	91.28	15	1	0.114041	1.88568	94.2971	0.318153	0.0726377	0.204112
6	8.68	175	953.7	955.4	954.55	1.7	1.5	29.8	0.466	29	91.28	15	1	0.114041	1.88568	94.2971	0.302173	0.0726377	0.188132
1	8.68	175	967.5	970.7	969.1	2.8	2.2	29.9	1.2	26	143.64	24	1	0.430714	7.12186	94.2971	0.897091	0.27434	0.466378
2	8.68	175	967.5	970.7	969.1	2.8	2.2	29.9	1.2	26	143.64	24	1	0.430714	7.12186	94.2971	0.801072	0.27434	0.370359
3	8.68	175	967.5	970.7	969.1	2.8	2.2	29.9	1.2	26	143.64	24	1	0.430714	7.12186	94.2971	0.814789	0.27434	0.384076
4	8.68	175	967.5	970.7	969.1	2.8	2.2	29.9	1.2	26	143.64	24	1	0.430714	7.12186	94.2971	0.910808	0.27434	0.480095
5	8.68	175	967.5	970.7	969.1	2.8	2.2	29.9	1.2	26	143.64	24	1	0.430714	7.12186	94.2971	1.20161	0.27434	0.770895
6	8.68	175	967.5	970.7	969.1	2.8	2.2	29.9	1.2	26	143.64	24	1	0.430714	7.12186	94.2971	1.14125	0.27434	0.71054
1	9.31	125	932.7	934.7	933.7	2	0.4	31.2	0.819	20	58.8	9.5	1	0.0893936	0.771627	89.6177	0.177401	0.0346487	0.0880077
2	9.31	125	932.7	934.7	933.7	2	0.4	31.2	0.819	20	58.8	9.5	1	0.0893936	0.771627	89.6177	0.196458	0.0346487	0.107064
3	9.31	125	932.7	934.7	933.7	2	0.4	31.2	0.819	20	58.8	9.5	1	0.0893936	0.771627	89.6177	0.192647	0.0346487	0.103253
4	9.31	125	932.7	934.7	933.7	2	0.4	31.2	0.819	20	58.8	9.5	1	0.0893936	0.771627	89.6177	0.203734	0.0346487	0.114341
5	9.31	125	932.7	934.7	933.7	2	0.4	31.2	0.819	20	58.8	9.5	1	0.0893936	0.771627	89.6177	0.182252	0.0346487	0.0928585
6	9.31	125	932.7	934.7	933.7	2	0.4	31.2	0.819	20	58.8	9.5	1	0.0893936	0.771627	89.6177	0.144832	0.0346487	0.0554379
1	9.31	125	946.2	950.4	948.3	4	3.1	33	1.257	21	47.04	7.5	1	1.06331	9.17826	89.6177	2.11013	0.412136	1.04682
2	9.31	125	946.2	950.4	948.3	4	3.1	33	1.257	21	47.04	7.5	1	1.06331	9.17826	89.6177	2.33681	0.412136	1.2735
3	9.31	125	946.2	950.4	948.3	4	3.1	33	1.257	21	47.04	7.5	1	1.06331	9.17826	89.6177	2.29147	0.412136	1.22816
4	9.31	125	946.2	950.4	948.3	4	3.1	33	1.257	21	47.04	7.5	1	1.06331	9.17826	89.6177	2.42336	0.412136	1.36005
5	9.31	125	946.2	950.4	948.3	4	3.1	33	1.257	21	47.04	7.5	1	1.06331	9.17826	89.6177	2.16783	0.412136	1.10452
6	9.31	125	946.2	950.4	948.3	4	3.1	33	1.257	21	47.04	7.5	1	1.06331	9.17826	89.6177	1.72273	0.412136	0.659417
1	7.92	125	930	931.6	930.8	1.6	1.3	32.5	1.032	32	47.04	7.5	1	0.251079	3.82198	93.8356	1.68084	0.232481	1.42976
2	7.92	125	930	931.6	930.8	1.6	1.3	32.5	1.032	32	47.04	7.5	1	0.251079	3.82198	93.8356	1.26237	0.232481	1.01129
3	7.92	125	930	931.6	930.8	1.6	1.3	32.5	1.032	32	47.04	7.5	1	0.251079	3.82198	93.8356	1.21355	0.232481	0.96247
4	7.92	125	930	931.6	930.8	1.6	1.3	32.5	1.032	32	47.04	7.5	1	0.251079	3.82198	93.8356	1.75988	0.232481	1.5088
5	7.92	125	930	931.6	930.8	1.6	1.3	32.5	1.032	32	47.04	7.5	1	0.251079	3.82198	93.8356	1.71106	0.232481	1.45998
6	7.92	125	930	931.6	930.8	1.6	1.3	32.5	1.032	32	47.04	7.5	1	0.251079	3.82198	93.8356	1.47393	0.232481	1.22285
1	7.92	125	958.7	963.9	961.3	5.2	2.5	31.7	0.496	21	41.44	6.5	1	0.232065	3.53254	93.8356	1.55355	0.214875	1.32148
2	7.92	125	958.7	963.9	961.3	5.2	2.5	31.7	0.496	21	41.44	6.5	1	0.232065	3.53254	93.8356	1.16677	0.214875	0.934706
3	7.92	125	958.7	963.9	961.3	5.2	2.5	31.7	0.496	21	41.44	6.5	1	0.232065	3.53254	93.8356	1.12165	0.214875	0.889582
4	7.92	125	958.7	963.9	961.3	5.2	2.5	31.7	0.496	21	41.44	6.5	1	0.232065	3.53254	93.8356	1.6266	0.214875	1.39454
5	7.92	125	958.7	963.9	961.3	5.2	2.5	31.7	0.496	21	41.44	6.5	1	0.232065	3.53254	93.8356	1.58148	0.214875	1.34941
6	7.92	125	958.7	963.9	961.3	5.2	2.5	31.7	0.496	21	41.44	6.5	1	0.232065	3.53254	93.8356	1.36231	0.214875	1.13024
1	7.92	125	970.5	974	972.25	3.5	1.8	29.5	0.787	26	47.32	7.5	1	0.265115	4.03565	93.8356	1.7748	0.245477	1.50968
2	7.92	125	970.5	974	972.25	3.5	1.8	29.5	0.787	26	47.32	7.5	1	0.265115	4.03565	93.8356	1.33294	0.245477	1.06783
3	7.92	125	970.5	974	972.25	3.5	1.8	29.5	0.787	26	47.32	7.5	1	0.265115	4.03565	93.8356	1.28139	0.245477	1.01628
4	7.92	125	970.5	974	972.25	3.5	1.8	29.5	0.787	26	47.32	7.5	1	0.265115	4.03565	93.8356	1.85826	0.245477	1.59315
5	7.92	125	970.5	974	972.25	3.5	1.8	29.5	0.787	26	47.32	7.5	1	0.265115	4.03565	93.8356	1.80671	0.245477	1.5416
6	7.92	125	970.5	974	972.25	3.5	1.8	29.5	0.787	26	47.32	7.5	1	0.265115	4.03565	93.8356	1.55633	0.245477	1.29121
1	9.56	150	966.9	969.1	968	2.2	2.2	31.7	0.588	21	70.28	11.5	1	0.372113	15.9839	97.7249	2.03816	0.845711	1.66605
2	9.56	150	966.9	969.1	968	2.2	2.2	31.7	0.588	21	70.28	11.5	1	0.372113	15.9839	97.7249	1.92822	0.845711	1.55611
3	9.56	150	966.9	969.1	968	2.2	2.2	31.7	0.588	21	70.28	11.5	1	0.372113	15.9839	97.7249	1.57302	0.845711	1.20091
4	9.56	150	966.9	969.1	968	2.2	2.2	31.7	0.588	21	70.28	11.5	1	0.372113	15.9839	97.7249	1.75062	0.845711	1.37851
5	9.56	150	966.9	969.1	968	2.2	2.2	31.7	0.588	21	70.28	11.5	1	0.372113	15.9839	97.7249	1.0656	0.845711	0.693483
6	9.56	150	966.9	969.1	968	2.2	2.2	31.7	0.588	21	70.28	11.5	1	0.372113	15.9839	97.7249	0.854168	0.845711	0.482055
1	9.56	150	972.4	974.4	973.4	2	0.8	29.2	0.113	24	113.96	19	1	0.0260042	1.117	97.7249	0.142432	0.0591004	0.116428
2	9.56	150	972.4	974.4	973.4	2	0.8	29.2	0.113	24	113.96	19	1	0.0260042	1.117	97.7249	0.134749	0.0591004	0.108745
3	9.56	150	972.4	974.4	973.4	2	0.8	29.2	0.113	24	113.96	19	1	0.0260042	1.117	97.7249	0.109927	0.0591004	0.0839226
4	9.56	150	972.4	974.4	973.4	2	0.8	29.2	0.113	24	113.96	19	1	0.0260042	1.117	97.7249	0.122338	0.0591004	0.0963337
5	9.56	150	972.4	974.4	973.4	2	0.8	29.2	0.113	24	113.96	19	1	0.0260042	1.117	97.7249	0.0744665	0.0591004	0.0484623
6	9.56	150	972.4	974.4	973.4	2	0.8	29.2	0.113	24	113.96	19	1	0.0260042	1.117	97.7249	0.0596914	0.0591004	0.0336872
1	12.57	150	1061.2	1063.3	1062.25	2.1	0.5	26.7	0.282	26	136.08	22.5	1	0.753867	11.0845	93.632	3.07804	0.297971	2.32418
2	12.57	150	1061.2	1063.3	1062.25	2.1	0.5	26.7	0.282	26	136.08	22.5	1	0.753867	11.0845	93.632	2.53276	0.297971	1.77889
3	12.57	150	1061.2	1063.3	1062.25	2.1	0.5	26.7	0.282	26	136.08	22.5	1	0.753867	11.0845	93.632	1.79081	0.297971	1.03694
4	12.57	150	1061.2	1063.3	1062.25	2.1	0.5	26.7	0.282	26	136.08	22.5	1	0.753867	11.0845	93.632	1.33193	0.297971	0.578064
5	12.57	150	1061.2	1063.3	1062.25	2.1	0.5	26.7	0.282	26	136.08	22.5	1	0.753867	11.0845	93.632	1.26042	0.297971	0.506551
6	12.57	150	1061.2	1063.3	1062.25	2.1	0.5	26.7	0.282	26	136.08	22.5	1	0.753867	11.0845	93.632	1.07866	0.297971	0.324789
1	12.57	150	1068	1072.4	1070.2	3	1.9	19.2	0.009	26	94.92	15	1	0.0914265	1.34429	93.632	0.373295	0.0361369	0.281868
2	12.57	150	1068	1072.4	1070.2	3	1.9	19.2	0.009	26	94.92	15	1	0.0914265	1.34429	93.632	0.307164	0.0361369	0.215738
3	12.57	150	1068	1072.4	1070.2	3	1.9	19.2	0.009	26	94.92	15	1	0.0914265	1.34429	93.632	0.217183	0.0361369	0.125757
4	12.57	150	1068	1072.4	1070.2	3	1.9	19.2	0.009	26	94.92	15	1	0.0914265	1.34429	93.632	0.161532	0.0361369	0.0701057
5	12.57	150	1068	1072.4	1070.2	3	1.9	19.2	0.009	26	94.92	15	1	0.0914265	1.34429	93.632	0.152859	0.0361369	0.0614328
6	12.57	150	1068	1072.4	1070.2	3	1.9	19.2	0.009	26	94.92	15	1	0.0914265	1.34429	93.632	0.130816	0.0361369	0.0393893
1	12.57	150	1079.1	1082	1080.55	1.7	0.9	27	0.315	27	94.92	15	1	1.51575	22.287	93.632	6.18883	0.599112	4.67308
2	12.57	150	1079.1	1082	1080.55	1.7	0.9	27	0.315	27	94.92	15	1	1.51575	22.287	93.632	5.09246	0.599112	3.5767
3	12.57	150	1079.1	1082	1080.55	1.7	0.9	27	0.315	27	94.92	15	1	1.51575	22.287	93.632	3.60067	0.599112	2.08491
4	12.57	150	1079.1	1082	1080.55	1.7	0.9	27	0.315	27	94.92	15	1	1.51575	22.287	93.632	2.67803	0.599112	1.16228
5	12.57	150	1079.1	1082	1080.55	1.7	0.9	27	0.315	27	94.92	15	1	1.51575	22.287	93.632	2.53425	0.599112	1.01849
6	12.57	150	1079.1	1082	1080.55	1.7	0.9	27	0.315	27	94.92	15	1	1.51575	22.287	93.632	2.16879	0.599112	0.653033
1	12.57	150	1084.3	1086.5	1085.4	1.7	0.3	24.4	0.064	27	94.92	15	1	0.102654	1.50938	93.632	0.419138	0.0405748	0.316484
2	12.57	150	1084.3	1086.5	1085.4	1.7	0.3	24.4	0.064	27	94.92	15	1	0.102654	1.50938	93.632	0.344886	0.0405748	0.242232
3	12.57	150	1084.3	1086.5	1085.4	1.7	0.3	24.4	0.064	27	94.92	15	1	0.102654	1.50938	93.632	0.243855	0.0405748	0.1412
4	12.57	150	1084.3	1086.5	1085.4	1.7	0.3	24.4	0.064	27	94.92	15	1	0.102654	1.50938	93.632	0.181369	0.0405748	0.0787151
5	12.57	150	1084.3	1086.5	1085.4	1.7	0.3	24.4	0.064	27	94.92	15	1	0.102654	1.50938	93.632	0.171631	0.0405748	0.0689772
6	12.57	150	1084.3	1086.5	1085.4	1.7	0.3	24.4	0.064	27	94.92	15	1	0.102654	1.50938	93.632	0.146881	0.0405748	0.0442265
1	12.57	150	1088	1091.5	1089.75	0.9	0.2	24.3	0.062	28	94.92	15	1	0.0662975	0.97481	93.632	0.270693	0.0262046	0.204396
2	12.57	150	1088	1091.5	1089.75	0.9	0.2	24.3	0.062	28	94.92	15	1	0.0662975	0.97481	93.632	0.222739	0.0262046	0.156441
3	12.57	150	1088	1091.5	1089.75	0.9	0.2	24.3	0.062	28	94.92	15	1	0.0662975	0.97481	93.632	0.157489	0.0262046	0.0911919
4	12.57	150	1088	1091.5	1089.75	0.9	0.2	24.3	0.062	28	94.92	15	1	0.0662975	0.97481	93.632	0.117134	0.0262046	0.0508369
5	12.57	150	1088	1091.5	1089.75	0.9	0.2	24.3	0.062	28	94.92	15	1	0.0662975	0.97481	93.632	0.110845	0.0262046	0.0445478
6	12.57	150	1088	1091.5	1089.75	0.9	0.2	24.3	0.062	28	94.92	15	1	0.0662975	0.97481	93.632	0.0948605	0.0262046	0.028563
1	8.09	150	914	916	915	2	1.3	29.3	0.339	23	70.28	11.5	1	0.553764	11.5905	95.4401	0.799347	0.481534	0.245582
2	8.09	150	914	916	915	2	1.3	29.3	0.339	23	70.28	11.5	1	0.553764	11.5905	95.4401	1.08827	0.481534	0.534503
3	8.09	150	914	916	915	2	1.3	29.3	0.339	23	70.28	11.5	1	0.553764	11.5905	95.4401	1.17976	0.481534	0.625994
4	8.09	150	914	916	915	2	1.3	29.3	0.339	23	70.28	11.5	1	0.553764	11.5905	95.4401	1.36274	0.481534	0.808977
5	8.09	150	914	916	915	2	1.3	29.3	0.339	23	70.28	11.5	1	0.553764	11.5905	95.4401	1.39645	0.481534	0.842685
1	8.59	106	902	905.6	903.8	1.9	1.5	32	0.331	18	89.04	15	1	0.231588	8.24712	97.2686	0.231588	0.643301	3.60822e-16
2	8.59	106	902	905.6	903.8	1.9	1.5	32	0.331	18	89.04	15	1	0.231588	8.24712	97.2686	0.836292	0.643301	0.604703
3	8.59	106	902	905.6	903.8	1.9	1.5	32	0.331	18	89.04	15	1	0.231588	8.24712	97.2686	0.283053	0.643301	0.0514641
4	8.59	106	902	905.6	903.8	1.9	1.5	32	0.331	18	89.04	15	1	0.231588	8.24712	97.2686	0.46961	0.643301	0.238022
5	8.59	106	902	905.6	903.8	1.9	1.5	32	0.331	18	89.04	15	1	0.231588	8.24712	97.2686	0.411713	0.643301	0.180124
6	8.59	106	902	905.6	903.8	1.9	1.5	32	0.331	18	89.04	15	1	0.231588	8.24712	97.2686	0.244455	0.643301	0.012866
1	8.91	106	930.6	935.9	933.25	4.9	3.6	32.2	0.977	28	52.92	8.5	1	2.85408	16.4764	85.2354	3.14362	0.68939	0.289544
2	8.91	106	930.6	935.9	933.25	4.9	3.6	32.2	0.977	28	52.92	8.5	1	2.85408	16.4764	85.2354	2.92301	0.68939	0.068939
3	8.91	106	930.6	935.9	933.25	4.9	3.6	32.2	0.977	28	52.92	8.5	1	2.85408	16.4764	85.2354	3.054	0.68939	0.199923
4	8.91	106	930.6	935.9	933.25	4.9	3.6	32.2	0.977	28	52.92	8.5	1	2.85408	16.4764	85.2354	3.1643	0.68939	0.310226
1	9.31	125	962.7	967.6	965.15	4	1.1	31.9	0.608	26	38.64	6	1	0.355074	11.4311	96.9874	0.977409	0.381801	0.622335
2	9.31	125	962.7	967.6	965.15	4	1.1	31.9	0.608	26	38.64	6	1	0.355074	11.4311	96.9874	0.733057	0.381801	0.377983
3	9.31	125	962.7	967.6	965.15	4	1.1	31.9	0.608	26	38.64	6	1	0.355074	11.4311	96.9874	0.549793	0.381801	0.194718
4	9.31	125	962.7	967.6	965.15	4	1.1	31.9	0.608	26	38.64	6	1	0.355074	11.4311	96.9874	0.568883	0.381801	0.213808
5	9.31	125	962.7	967.6	965.15	4	1.1	31.9	0.608	26	38.64	6	1	0.355074	11.4311	96.9874	1.16067	0.381801	0.805599
6	9.31	125	962.7	967.6	965.15	4	1.1	31.9	0.608	26	38.64	6	1	0.355074	11.4311	96.9874	1.16831	0.381801	0.813235
1	9.31	125	973.4	977.3	975.35	2.9	1.3	31.7	0.553	26	38.64	6	1	0.381673	12.2874	96.9874	1.05063	0.410401	0.668954
2	9.31	125	973.4	977.3	975.35	2.9	1.3	31.7	0.553	26	38.64	6	1	0.381673	12.2874	96.9874	0.787971	0.410401	0.406297
3	9.31	125	973.4	977.3	975.35	2.9	1.3	31.7	0.553	26	38.64	6	1	0.381673	12.2874	96.9874	0.590978	0.410401	0.209305
4	9.31	125	973.4	977.3	975.35	2.9	1.3	31.7	0.553	26	38.64	6	1	0.381673	12.2874	96.9874	0.611498	0.410401	0.229825
5	9.31	125	973.4	977.3	975.35	2.9	1.3	31.7	0.553	26	38.64	6	1	0.381673	12.2874	96.9874	1.24762	0.410401	0.865947
6	9.31	125	973.4	977.3	975.35	2.9	1.3	31.7	0.553	26	38.64	6	1	0.381673	12.2874	96.9874	1.25583	0.410401	0.874155
1	9.31	125	978.9	983.3	981.1	3.3	0.7	30.6	0.52	23	73.44	12	1	0.193252	6.22148	96.9874	0.531963	0.207798	0.338711
2	9.31	125	978.9	983.3	981.1	3.3	0.7	30.6	0.52	23	73.44	12	1	0.193252	6.22148	96.9874	0.398972	0.207798	0.20572
3	9.31	125	978.9	983.3	981.1	3.3	0.7	30.6	0.52	23	73.44	12	1	0.193252	6.22148	96.9874	0.299229	0.207798	0.105977
4	9.31	125	978.9	983.3	981.1	3.3	0.7	30.6	0.52	23	73.44	12	1	0.193252	6.22148	96.9874	0.309619	0.207798	0.116367
5	9.31	125	978.9	983.3	981.1	3.3	0.7	30.6	0.52	23	73.44	12	1	0.193252	6.22148	96.9874	0.631706	0.207798	0.438454
6	9.31	125	978.9	983.3	981.1	3.3	0.7	30.6	0.52	23	73.44	12	1	0.193252	6.22148	96.9874	0.635862	0.207798	0.44261
1	9.96	175	1000.7	1004	1002.35	2.6	0.7	28.1	0.424	31	340	50	1	0.0613134	3.16305	98.0984	0.222892	0.0721334	0.161579
2	9.96	175	1000.7	1004	1002.35	2.6	0.7	28.1	0.424	31	340	50	1	0.0613134	3.16305	98.0984	0.107479	0.0721334	0.0461654
3	9.96	175	1000.7	1004	1002.35	2.6	0.7	28.1	0.424	31	340	50	1	0.0613134	3.16305	98.0984	0.0880027	0.0721334	0.0266894
4	9.96	175	1000.7	1004	1002.35	2.6	0.7	28.1	0.424	31	340	50	1	0.0613134	3.16305	98.0984	0.113971	0.0721334	0.0526574
5	9.96	175	1000.7	1004	1002.35	2.6	0.7	28.1	0.424	31	340	50	1	0.0613134	3.16305	98.0984	0.154365	0.0721334	0.0930521
6	9.96	175	1000.7	1004	1002.35	2.6	0.7	28.1	0.424	31	340	50	1	0.0613134	3.16305	98.0984	0.135611	0.0721334	0.0742974
1	9.96	125	971.2	976.6	973.9	3.2	2	31.5	0.57	24	340	50	1	0.254171	6.85986	96.4272	0.723836	0.138137	0.469664
2	9.96	125	971.2	976.6	973.9	3.2	2	31.5	0.57	24	340	50	1	0.254171	6.85986	96.4272	0.685158	0.138137	0.430986
3	9.96	125	971.2	976.6	973.9	3.2	2	31.5	0.57	24	340	50	1	0.254171	6.85986	96.4272	0.320477	0.138137	0.0663056
4	9.96	125	971.2	976.6	973.9	3.2	2	31.5	0.57	24	340	50	1	0.254171	6.85986	96.4272	0.338435	0.138137	0.0842633
5	9.96	125	971.2	976.6	973.9	3.2	2	31.5	0.57	24	340	50	1	0.254171	6.85986	96.4272	0.368825	0.138137	0.114653
1	8.6	125	913	915.3	914.15	2.3	1.6	32.6	1.161	19	52.78	8.5	1	0.363349	4.66701	92.7769	1.33632	0.134574	0.972967
2	8.6	125	913	915.3	914.15	2.3	1.6	32.6	1.161	19	52.78	8.5	1	0.363349	4.66701	92.7769	0.811479	0.134574	0.44813
3	8.6	125	913	915.3	914.15	2.3	1.6	32.6	1.161	19	52.78	8.5	1	0.363349	4.66701	92.7769	0.606927	0.134574	0.243578
4	8.6	125	913	915.3	914.15	2.3	1.6	32.6	1.161	19	52.78	8.5	1	0.363349	4.66701	92.7769	0.853197	0.134574	0.489848
5	8.6	125	913	915.3	914.15	2.3	1.6	32.6	1.161	19	52.78	8.5	1	0.363349	4.66701	92.7769	0.678251	0.134574	0.314902
6	8.6	125	913	915.3	914.15	2.3	1.6	32.6	1.161	19	52.78	8.5	1	0.363349	4.66701	92.7769	0.64999	0.134574	0.286642
1	8.6	125	916.7	919	917.85	1.9	0.6	29.1	0.442	22	70.84	11.5	1	0.0518734	0.666285	92.7769	0.190779	0.0192124	0.138906
2	8.6	125	916.7	919	917.85	1.9	0.6	29.1	0.442	22	70.84	11.5	1	0.0518734	0.666285	92.7769	0.115851	0.0192124	0.0639772
3	8.6	125	916.7	919	917.85	1.9	0.6	29.1	0.442	22	70.84	11.5	1	0.0518734	0.666285	92.7769	0.0866478	0.0192124	0.0347744
4	8.6	125	916.7	919	917.85	1.9	0.6	29.1	0.442	22	70.84	11.5	1	0.0518734	0.666285	92.7769	0.121806	0.0192124	0.0699331
5	8.6	125	916.7	919	917.85	1.9	0.6	29.1	0.442	22	70.84	11.5	1	0.0518734	0.666285	92.7769	0.0968304	0.0192124	0.044957
6	8.6	125	916.7	919	917.85	1.9	0.6	29.1	0.442	22	70.84	11.5	1	0.0518734	0.666285	92.7769	0.0927958	0.0192124	0.0409224
1	8.6	125	935.8	940.4	938.1	4.2	2.6	32.6	0.995	20	38.4	6	1	0.50602	6.49955	92.7769	1.86103	0.187415	1.35501
2	8.6	125	935.8	940.4	938.1	4.2	2.6	32.6	0.995	20	38.4	6	1	0.50602	6.49955	92.7769	1.13011	0.187415	0.624092
3	8.6	125	935.8	940.4	938.1	4.2	2.6	32.6	0.995	20	38.4	6	1	0.50602	6.49955	92.7769	0.845241	0.187415	0.339221
4	8.6	125	935.8	940.4	938.1	4.2	2.6	32.6	0.995	20	38.4	6	1	0.50602	6.49955	92.7769	1.18821	0.187415	0.68219
5	8.6	125	935.8	940.4	938.1	4.2	2.6	32.6	0.995	20	38.4	6	1	0.50602	6.49955	92.7769	0.944571	0.187415	0.438551
6	8.6	125	935.8	940.4	938.1	4.2	2.6	32.6	0.995	20	38.4	6	1	0.50602	6.49955	92.7769	0.905214	0.187415	0.399194
1	8.6	125	942.3	943.5	942.9	1.2	1	31.9	0.412	19	70.56	11.5	1	0.0805877	1.0351	92.7769	0.296384	0.0298473	0.215796
2	8.6	125	942.3	943.5	942.9	1.2	1	31.9	0.412	19	70.56	11.5	1	0.0805877	1.0351	92.7769	0.179979	0.0298473	0.0993915
3	8.6	125	942.3	943.5	942.9	1.2	1	31.9	0.412	19	70.56	11.5	1	0.0805877	1.0351	92.7769	0.134611	0.0298473	0.0540236
4	8.6	125	942.3	943.5	942.9	1.2	1	31.9	0.412	19	70.56	11.5	1	0.0805877	1.0351	92.7769	0.189232	0.0298473	0.108644
5	8.6	125	942.3	943.5	942.9	1.2	1	31.9	0.412	19	70.56	11.5	1	0.0805877	1.0351	92.7769	0.15043	0.0298473	0.0698426
6	8.6	125	942.3	943.5	942.9	1.2	1	31.9	0.412	19	70.56	11.5	1	0.0805877	1.0351	92.7769	0.144162	0.0298473	0.0635747
1	8.6	125	945.2	952.4	948.8	7.2	5.8	32.3	1.413	20	38.4	6	1	1.60303	20.59	92.7769	5.89559	0.593715	4.29256
2	8.6	125	945.2	952.4	948.8	7.2	5.8	32.3	1.413	20	38.4	6	1	1.60303	20.59	92.7769	3.5801	0.593715	1.97707
3	8.6	125	945.2	952.4	948.8	7.2	5.8	32.3	1.413	20	38.4	6	1	1.60303	20.59	92.7769	2.67765	0.593715	1.07462
4	8.6	125	945.2	952.4	948.8	7.2	5.8	32.3	1.413	20	38.4	6	1	1.60303	20.59	92.7769	3.76415	0.593715	2.16112
5	8.6	125	945.2	952.4	948.8	7.2	5.8	32.3	1.413	20	38.4	6	1	1.60303	20.59	92.7769	2.99232	0.593715	1.38929
6	8.6	125	945.2	952.4	948.8	7.2	5.8	32.3	1.413	20	38.4	6	1	1.60303	20.59	92.7769	2.86764	0.593715	1.26461
1	9.78	150	1005.5	1008.8	1007.15	3.3	1.5	27.9	0.393	21	114.48	19	1	0.460481	22.4882	97.9934	3.20663	0.837239	2.74614
2	9.78	150	1005.5	1008.8	1007.15	3.3	1.5	27.9	0.393	21	114.48	19	1	0.460481	22.4882	97.9934	1.69122	0.837239	1.23074
3	9.78	150	1005.5	1008.8	1007.15	3.3	1.5	27.9	0.393	21	114.48	19	1	0.460481	22.4882	97.9934	2.4866	0.837239	2.02612
4	9.78	150	1005.5	1008.8	1007.15	3.3	1.5	27.9	0.393	21	114.48	19	1	0.460481	22.4882	97.9934	2.67079	0.837239	2.21031
5	9.78	150	1005.5	1008.8	1007.15	3.3	1.5	27.9	0.393	21	114.48	19	1	0.460481	22.4882	97.9934	2.81312	0.837239	2.35264
6	9.78	150	1005.5	1008.8	1007.15	3.3	1.5	27.9	0.393	21	114.48	19	1	0.460481	22.4882	97.9934	1.54889	0.837239	1.08841
1	9.78	150	1010.2	1012	1011.1	1.4	0.6	28.4	0.191	21	96.2	15	1	0.0895185	4.37176	97.9934	0.623375	0.162761	0.533856
2	9.78	150	1010.2	1012	1011.1	1.4	0.6	28.4	0.191	21	96.2	15	1	0.0895185	4.37176	97.9934	0.328777	0.162761	0.239259
3	9.78	150	1010.2	1012	1011.1	1.4	0.6	28.4	0.191	21	96.2	15	1	0.0895185	4.37176	97.9934	0.4834	0.162761	0.393882
4	9.78	150	1010.2	1012	1011.1	1.4	0.6	28.4	0.191	21	96.2	15	1	0.0895185	4.37176	97.9934	0.519207	0.162761	0.429689
5	9.78	150	1010.2	1012	1011.1	1.4	0.6	28.4	0.191	21	96.2	15	1	0.0895185	4.37176	97.9934	0.546877	0.162761	0.457358
6	9.78	150	1010.2	1012	1011.1	1.4	0.6	28.4	0.191	21	96.2	15	1	0.0895185	4.37176	97.9934	0.301108	0.162761	0.211589
1	9.31	125	942.7	946.9	944.8	4.2	2.1	31	0.787	17	47.28	7.5	1	0.351562	8.45672	96.0087	0.722351	0.274658	0.370788
2	9.31	125	942.7	946.9	944.8	4.2	2.1	31	0.787	17	47.28	7.5	1	0.351562	8.45672	96.0087	0.876159	0.274658	0.524597
3	9.31	125	942.7	946.9	944.8	4.2	2.1	31	0.787	17	47.28	7.5	1	0.351562	8.45672	96.0087	0.95581	0.274658	0.604248
4	9.31	125	942.7	946.9	944.8	4.2	2.1	31	0.787	17	47.28	7.5	1	0.351562	8.45672	96.0087	0.988769	0.274658	0.637207
5	9.31	125	942.7	946.9	944.8	4.2	2.1	31	0.787	17	47.28	7.5	1	0.351562	8.45672	96.0087	0.862426	0.274658	0.510864
6	9.31	125	942.7	946.9	944.8	4.2	2.1	31	0.787	17	47.28	7.5	1	0.351562	8.45672	96.0087	0.873413	0.274658	0.52185
1	9.31	125	964.7	966.8	965.75	1	0.3	28	0.191	23	91.2	15	1	0.0121889	0.293199	96.0087	0.0250443	0.00952254	0.0128554
2	9.31	125	964.7	966.8	965.75	1	0.3	28	0.191	23	91.2	15	1	0.0121889	0.293199	96.0087	0.0303769	0.00952254	0.0181881
3	9.31	125	964.7	966.8	965.75	1	0.3	28	0.191	23	91.2	15	1	0.0121889	0.293199	96.0087	0.0331385	0.00952254	0.0209496
4	9.31	125	964.7	966.8	965.75	1	0.3	28	0.191	23	91.2	15	1	0.0121889	0.293199	96.0087	0.0342812	0.00952254	0.0220923
5	9.31	125	964.7	966.8	965.75	1	0.3	28	0.191	23	91.2	15	1	0.0121889	0.293199	96.0087	0.0299008	0.00952254	0.0177119
6	9.31	125	964.7	966.8	965.75	1	0.3	28	0.191	23	91.2	15	1	0.0121889	0.293199	96.0087	0.0302817	0.00952254	0.0180928
2	9.4	125	922.5	924.3	923.4	1.8	0.7	30.4	0.445	27	70.28	21	1	0.165271	2.78087	94.3902	0.19593	0.0479047	0.030659
3	9.4	125	922.5	924.3	923.4	1.8	0.7	30.4	0.445	27	70.28	21	1	0.165271	2.78087	94.3902	0.168624	0.0479047	0.00335333
4	9.4	125	922.5	924.3	923.4	1.8	0.7	30.4	0.445	27	70.28	21	1	0.165271	2.78087	94.3902	0.179163	0.0479047	0.0138923
2	9.4	125	925.8	933.9	929.85	8.1	5.5	30.2	0.704	20	70.28	11.5	1	2.05435	34.5666	94.3902	2.43544	0.595463	0.381097
3	9.4	125	925.8	933.9	929.85	8.1	5.5	30.2	0.704	20	70.28	11.5	1	2.05435	34.5666	94.3902	2.09603	0.595463	0.0416824
4	9.4	125	925.8	933.9	929.85	8.1	5.5	30.2	0.704	20	70.28	11.5	1	2.05435	34.5666	94.3902	2.22703	0.595463	0.172684
2	9.4	125	937.2	938.4	937.8	1.2	0.6	30	0.41	25	82.04	13.5	1	0.130519	2.19612	94.3902	0.154731	0.0378316	0.0242122
3	9.4	125	937.2	938.4	937.8	1.2	0.6	30	0.41	25	82.04	13.5	1	0.130519	2.19612	94.3902	0.133167	0.0378316	0.00264821
4	9.4	125	937.2	938.4	937.8	1.2	0.6	30	0.41	25	82.04	13.5	1	0.130519	2.19612	94.3902	0.14149	0.0378316	0.0109712
1	9.51	175	1082.5	1084.6	1083.55	2.1	1.6	27.5	0.064	38	91.56	15	1	0.0333706	0.710461	95.5137	0.0395824	0.0144461	0.00621184
2	9.51	175	1082.5	1084.6	1083.55	2.1	1.6	27.5	0.064	38	91.56	15	1	0.0333706	0.710461	95.5137	0.0371266	0.0144461	0.003756
3	9.51	175	1082.5	1084.6	1083.55	2.1	1.6	27.5	0.064	38	91.56	15	1	0.0333706	0.710461	95.5137	0.0339484	0.0144461	0.000577845
4	9.51	175	1082.5	1084.6	1083.55	2.1	1.6	27.5	0.064	38	91.56	15	1	0.0333706	0.710461	95.5137	0.0401603	0.0144461	0.00678968
1	9.51	175	1086.5	1090.5	1088.5	4	4	29.8	0.525	28	91.56	15	1	0.684358	14.57	95.5137	0.811749	0.296259	0.127391
2	9.51	175	1086.5	1090.5	1088.5	4	4	29.8	0.525	28	91.56	15	1	0.684358	14.57	95.5137	0.761385	0.296259	0.0770273
3	9.51	175	1086.5	1090.5	1088.5	4	4	29.8	0.525	28	91.56	15	1	0.684358	14.57	95.5137	0.696208	0.296259	0.0118503
4	9.51	175	1086.5	1090.5	1088.5	4	4	29.8	0.525	28	91.56	15	1	0.684358	14.57	95.5137	0.823599	0.296259	0.139242
1	9.51	175	1106	1109.4	1107.7	3.4	3	31.2	0.617	32	141.12	23.5	1	0.603212	12.8424	95.5137	0.715499	0.261131	0.112286
2	9.51	175	1106	1109.4	1107.7	3.4	3	31.2	0.617	32	141.12	23.5	1	0.603212	12.8424	95.5137	0.671106	0.261131	0.067894
3	9.51	175	1106	1109.4	1107.7	3.4	3	31.2	0.617	32	141.12	23.5	1	0.603212	12.8424	95.5137	0.613658	0.261131	0.0104452
4	9.51	175	1106	1109.4	1107.7	3.4	3	31.2	0.617	32	141.12	23.5	1	0.603212	12.8424	95.5137	0.725944	0.261131	0.122732
4	9.86	150	872.7	879.1	875.9	5.7	3.7	31.5	0.608	22	70	11.5	1	0.187685	5.64247	96.7808	0.321746	0.297913	0.134061
5	9.86	150	872.7	879.1	875.9	5.7	3.7	31.5	0.608	22	70	11.5	1	0.187685	5.64247	96.7808	0.315788	0.297913	0.128103
6	9.86	150	872.7	879.1	875.9	5.7	3.7	31.5	0.608	22	70	11.5	1	0.187685	5.64247	96.7808	0.345579	0.297913	0.157894
4	9.86	150	881.6	883.8	882.7	2.2	1.8	29.5	0.588	20	70	11.5	1	0.0883028	2.65469	96.7808	0.151376	0.140163	0.0630734
5	9.86	150	881.6	883.8	882.7	2.2	1.8	29.5	0.588	20	70	11.5	1	0.0883028	2.65469	96.7808	0.148573	0.140163	0.0602702
6	9.86	150	881.6	883.8	882.7	2.2	1.8	29.5	0.588	20	70	11.5	1	0.0883028	2.65469	96.7808	0.162589	0.140163	0.0742865
1	12.38	150	1107.9	1110.7	1109.3	2.8	2.2	28	0.409	25	70.56	11.5	1	0.392891	7.56563	95.0633	1.17867	0.197433	0.785783
2	12.38	150	1107.9	1110.7	1109.3	2.8	2.2	28	0.409	25	70.56	11.5	1	0.392891	7.56563	95.0633	0.691015	0.197433	0.298124
3	12.38	150	1107.9	1110.7	1109.3	2.8	2.2	28	0.409	25	70.56	11.5	1	0.392891	7.56563	95.0633	0.669297	0.197433	0.276406
4	12.38	150	1107.9	1110.7	1109.3	2.8	2.2	28	0.409	25	70.56	11.5	1	0.392891	7.56563	95.0633	0.560709	0.197433	0.167818
5	12.38	150	1107.9	1110.7	1109.3	2.8	2.2	28	0.409	25	70.56	11.5	1	0.392891	7.56563	95.0633	0.531094	0.197433	0.138203
6	12.38	150	1107.9	1110.7	1109.3	2.8	2.2	28	0.409	25	70.56	11.5	1	0.392891	7.56563	95.0633	0.48371	0.197433	0.0908191
1	12.38	150	1128.9	1135.7	1132.3	6.4	5.4	29.1	0.544	31	53.48	8.5	1	1.28268	24.6997	95.0633	3.84805	0.644564	2.56536
2	12.38	150	1128.9	1135.7	1132.3	6.4	5.4	29.1	0.544	31	53.48	8.5	1	1.28268	24.6997	95.0633	2.25597	0.644564	0.973291
3	12.38	150	1128.9	1135.7	1132.3	6.4	5.4	29.1	0.544	31	53.48	8.5	1	1.28268	24.6997	95.0633	2.18507	0.644564	0.902389
4	12.38	150	1128.9	1135.7	1132.3	6.4	5.4	29.1	0.544	31	53.48	8.5	1	1.28268	24.6997	95.0633	1.83056	0.644564	0.547879
5	12.38	150	1128.9	1135.7	1132.3	6.4	5.4	29.1	0.544	31	53.48	8.5	1	1.28268	24.6997	95.0633	1.73388	0.644564	0.451195
6	12.38	150	1128.9	1135.7	1132.3	6.4	5.4	29.1	0.544	31	53.48	8.5	1	1.28268	24.6997	95.0633	1.57918	0.644564	0.296499
4	10.44	175	998.1	1003.2	1000.65	2.9	2.1	31.6	0.587	21	82.32	13.5	1	0.456099	13.5001	96.7319	0.544234	0.220337	0.088135
5	10.44	175	998.1	1003.2	1000.65	2.9	2.1	31.6	0.587	21	82.32	13.5	1	0.456099	13.5001	96.7319	0.658809	0.220337	0.20271
6	10.44	175	998.1	1003.2	1000.65	2.9	2.1	31.6	0.587	21	82.32	13.5	1	0.456099	13.5001	96.7319	0.577284	0.220337	0.121186
4	10.44	175	1021	1022.4	1021.7	1.4	1.2	29.2	0.222	25	120.48	20	1	0.0985679	2.91751	96.7319	0.117615	0.0476173	0.0190469
5	10.44	175	1021	1022.4	1021.7	1.4	1.2	29.2	0.222	25	120.48	20	1	0.0985679	2.91751	96.7319	0.142376	0.0476173	0.043808
6	10.44	175	1021	1022.4	1021.7	1.4	1.2	29.2	0.222	25	120.48	20	1	0.0985679	2.91751	96.7319	0.124757	0.0476173	0.0261895
4	10.44	175	1024.4	1028.6	1026.5	3.7	3	31.6	0.674	23	91.2	15	1	0.748139	22.1442	96.7319	0.892707	0.36142	0.144568
5	10.44	175	1024.4	1028.6	1026.5	3.7	3	31.6	0.674	23	91.2	15	1	0.748139	22.1442	96.7319	1.08065	0.36142	0.332506
6	10.44	175	1024.4	1028.6	1026.5	3.7	3	31.6	0.674	23	91.2	15	1	0.748139	22.1442	96.7319	0.94692	0.36142	0.198781
1	11.54	150	1080.6	1084.4	1082.5	3.8	3.8	28.8	0.542	28	71.04	11.5	1	0.39	24.26	98.4178	1.53	1	1.14
2	11.54	150	1080.6	1084.4	1082.5	3.8	3.8	28.8	0.542	28	71.04	11.5	1	0.39	24.26	98.4178	1.04	1	0.65
3	11.54	150	1080.6	1084.4	1082.5	3.8	3.8	28.8	0.542	28	71.04	11.5	1	0.39	24.26	98.4178	0.85	1	0.46
4	11.54	150	1080.6	1084.4	1082.5	3.8	3.8	28.8	0.542	28	71.04	11.5	1	0.39	24.26	98.4178	0.72	1	0.33
5	11.54	150	1080.6	1084.4	1082.5	3.8	3.8	28.8	0.542	28	71.04	11.5	1	0.39	24.26	98.4178	0.65	1	0.26
6	11.54	150	1080.6	1084.4	1082.5	3.8	3.8	28.8	0.542	28	71.04	11.5	1	0.39	24.26	98.4178	0.48	1	0.09
1	12.38	150	1112.7	1116.7	1114.7	4	3.9	31.1	1.049	25	53.52	8.5	1	0.1698	14.2349	98.8212	0.602387	0.404287	0.432587
2	12.38	150	1112.7	1116.7	1114.7	4	3.9	31.1	1.049	25	53.52	8.5	1	0.1698	14.2349	98.8212	0.699416	0.404287	0.529616
3	12.38	150	1112.7	1116.7	1114.7	4	3.9	31.1	1.049	25	53.52	8.5	1	0.1698	14.2349	98.8212	3.28685	0.404287	3.11705
4	12.38	150	1112.7	1116.7	1114.7	4	3.9	31.1	1.049	25	53.52	8.5	1	0.1698	14.2349	98.8212	3.13322	0.404287	2.96342
5	12.38	150	1112.7	1116.7	1114.7	4	3.9	31.1	1.049	25	53.52	8.5	1	0.1698	14.2349	98.8212	2.02143	0.404287	1.85163
6	12.38	150	1112.7	1116.7	1114.7	4	3.9	31.1	1.049	25	53.52	8.5	1	0.1698	14.2349	98.8212	1.37458	0.404287	1.20477
1	12.38	150	1118.7	1121.3	1120	2.1	0.2	27.2	0.102	23	114.72	19	1	0.000846699	0.0709816	98.8212	0.00300377	0.00201595	0.00215707
2	12.38	150	1118.7	1121.3	1120	2.1	0.2	27.2	0.102	23	114.72	19	1	0.000846699	0.0709816	98.8212	0.00348759	0.00201595	0.00264089
3	12.38	150	1118.7	1121.3	1120	2.1	0.2	27.2	0.102	23	114.72	19	1	0.000846699	0.0709816	98.8212	0.0163897	0.00201595	0.015543
4	12.38	150	1118.7	1121.3	1120	2.1	0.2	27.2	0.102	23	114.72	19	1	0.000846699	0.0709816	98.8212	0.0156236	0.00201595	0.0147769
5	12.38	150	1118.7	1121.3	1120	2.1	0.2	27.2	0.102	23	114.72	19	1	0.000846699	0.0709816	98.8212	0.0100797	0.00201595	0.00923305
6	12.38	150	1118.7	1121.3	1120	2.1	0.2	27.2	0.102	23	114.72	19	1	0.000846699	0.0709816	98.8212	0.00685423	0.00201595	0.00600753
1	12.38	150	1111.4	1119.1	1115.25	7.7	6.4	29.9	0.476	24	53.52	8.5	1	1.38767	23.5359	94.4323	1.67248	0.605971	0.284807
3	12.38	150	1111.4	1119.1	1115.25	7.7	6.4	29.9	0.476	24	53.52	8.5	1	1.38767	23.5359	94.4323	1.70278	0.605971	0.315105
4	12.38	150	1111.4	1119.1	1115.25	7.7	6.4	29.9	0.476	24	53.52	8.5	1	1.38767	23.5359	94.4323	2.03	0.605971	0.64233
1	12.38	150	1120.6	1123.7	1122.15	0.9	0.4	25.2	0.063	38	91.68	15	1	0.0114789	0.194691	94.4323	0.0138349	0.00501263	0.00235594
3	12.38	150	1120.6	1123.7	1122.15	0.9	0.4	25.2	0.063	38	91.68	15	1	0.0114789	0.194691	94.4323	0.0140855	0.00501263	0.00260657
4	12.38	150	1120.6	1123.7	1122.15	0.9	0.4	25.2	0.063	38	91.68	15	1	0.0114789	0.194691	94.4323	0.0167923	0.00501263	0.00531339
1	12.38	150	1134	1138.3	1136.15	4.3	4.1	30.1	0.477	33	53.52	8.5	1	0.890847	15.1094	94.4323	1.07368	0.389016	0.182838
3	12.38	150	1134	1138.3	1136.15	4.3	4.1	30.1	0.477	33	53.52	8.5	1	0.890847	15.1094	94.4323	1.09313	0.389016	0.202288
4	12.38	150	1134	1138.3	1136.15	4.3	4.1	30.1	0.477	33	53.52	8.5	1	0.890847	15.1094	94.4323	1.3032	0.389016	0.412357
1	10.61	150	1105	1106.9	1105.95	1.1	0.2	25.4	0.064	27	115.08	19	1	0.0286233	0.220939	88.5306	0.0813866	0.0114953	0.0527634
2	10.61	150	1105	1106.9	1105.95	1.1	0.2	25.4	0.064	27	115.08	19	1	0.0286233	0.220939	88.5306	0.101503	0.0114953	0.0728801
3	10.61	150	1105	1106.9	1105.95	1.1	0.2	25.4	0.064	27	115.08	19	1	0.0286233	0.220939	88.5306	0.0358653	0.0114953	0.00724203
4	10.61	150	1105	1106.9	1105.95	1.1	0.2	25.4	0.064	27	115.08	19	1	0.0286233	0.220939	88.5306	0.034026	0.0114953	0.00540278
5	10.61	150	1105	1106.9	1105.95	1.1	0.2	25.4	0.064	27	115.08	19	1	0.0286233	0.220939	88.5306	0.0513839	0.0114953	0.0227607
6	10.61	150	1105	1106.9	1105.95	1.1	0.2	25.4	0.064	27	115.08	19	1	0.0286233	0.220939	88.5306	0.06104	0.0114953	0.0324167
1	10.61	150	1121.1	1126.4	1123.75	3.7	2.7	28.5	0.403	49	91.56	15	1	2.4332	18.7816	88.5306	6.9185	0.977189	4.4853
2	10.61	150	1121.1	1126.4	1123.75	3.7	2.7	28.5	0.403	49	91.56	15	1	2.4332	18.7816	88.5306	8.62858	0.977189	6.19538
3	10.61	150	1121.1	1126.4	1123.75	3.7	2.7	28.5	0.403	49	91.56	15	1	2.4332	18.7816	88.5306	3.04883	0.977189	0.615629
4	10.61	150	1121.1	1126.4	1123.75	3.7	2.7	28.5	0.403	49	91.56	15	1	2.4332	18.7816	88.5306	2.89248	0.977189	0.459279
5	10.61	150	1121.1	1126.4	1123.75	3.7	2.7	28.5	0.403	49	91.56	15	1	2.4332	18.7816	88.5306	4.36804	0.977189	1.93483
6	10.61	150	1121.1	1126.4	1123.75	3.7	2.7	28.5	0.403	49	91.56	15	1	2.4332	18.7816	88.5306	5.18887	0.977189	2.75567
1	10.17	150	965.1	966.5	965.8	1.4	1.2	29.2	0.464	22	70.56	11.5	1	0.160843	1.528	90.4762	0.886309	0.0837722	0.725467
2	10.17	150	965.1	966.5	965.8	1.4	1.2	29.2	0.464	22	70.56	11.5	1	0.160843	1.528	90.4762	0.573002	0.0837722	0.412159
3	10.17	150	965.1	966.5	965.8	1.4	1.2	29.2	0.464	22	70.56	11.5	1	0.160843	1.528	90.4762	0.409646	0.0837722	0.248803
4	10.17	150	965.1	966.5	965.8	1.4	1.2	29.2	0.464	22	70.56	11.5	1	0.160843	1.528	90.4762	0.318334	0.0837722	0.157492
5	10.17	150	965.1	966.5	965.8	1.4	1.2	29.2	0.464	22	70.56	11.5	1	0.160843	1.528	90.4762	0.21697	0.0837722	0.0561273
6	10.17	150	965.1	966.5	965.8	1.4	1.2	29.2	0.464	22	70.56	11.5	1	0.160843	1.528	90.4762	0.249641	0.0837722	0.0887985
1	10.72	175	983.5	983.8	983.65	0.3	0.3	28.6	0.127	33	91.44	15	1	0.140392	1.00694	87.7636	0.348292	0.0298706	0.2079
2	10.72	175	983.5	983.8	983.65	0.3	0.3	28.6	0.127	33	91.44	15	1	0.140392	1.00694	87.7636	0.340525	0.0298706	0.200133
3	10.72	175	983.5	983.8	983.65	0.3	0.3	28.6	0.127	33	91.44	15	1	0.140392	1.00694	87.7636	0.335149	0.0298706	0.194757
4	10.72	175	983.5	983.8	983.65	0.3	0.3	28.6	0.127	33	91.44	15	1	0.140392	1.00694	87.7636	0.318122	0.0298706	0.17773
5	10.72	175	983.5	983.8	983.65	0.3	0.3	28.6	0.127	33	91.44	15	1	0.140392	1.00694	87.7636	0.32798	0.0298706	0.187588
6	10.72	175	983.5	983.8	983.65	0.3	0.3	28.6	0.127	33	91.44	15	1	0.140392	1.00694	87.7636	0.305577	0.0298706	0.165185
1	10.72	175	989.7	993.1	991.4	3.4	2.3	31.1	0.426	20	119	19	1	3.6104	25.895	87.7636	8.95685	0.768169	5.34646
2	10.72	175	989.7	993.1	991.4	3.4	2.3	31.1	0.426	20	119	19	1	3.6104	25.895	87.7636	8.75713	0.768169	5.14673
3	10.72	175	989.7	993.1	991.4	3.4	2.3	31.1	0.426	20	119	19	1	3.6104	25.895	87.7636	8.61886	0.768169	5.00846
4	10.72	175	989.7	993.1	991.4	3.4	2.3	31.1	0.426	20	119	19	1	3.6104	25.895	87.7636	8.181	0.768169	4.57061
5	10.72	175	989.7	993.1	991.4	3.4	2.3	31.1	0.426	20	119	19	1	3.6104	25.895	87.7636	8.4345	0.768169	4.8241
6	10.72	175	989.7	993.1	991.4	3.4	2.3	31.1	0.426	20	119	19	1	3.6104	25.895	87.7636	7.85837	0.768169	4.24798
1	9.97	175	977.8	980.3	979.05	2.1	1.7	26.4	0.925	27	144.48	24	1	0.586572	6.54347	91.7732	0.705102	0.303923	0.11853
2	9.97	175	977.8	980.3	979.05	2.1	1.7	26.4	0.925	27	144.48	24	1	0.586572	6.54347	91.7732	1.49226	0.303923	0.905692
3	9.97	175	977.8	980.3	979.05	2.1	1.7	26.4	0.925	27	144.48	24	1	0.586572	6.54347	91.7732	1.24913	0.303923	0.662553
4	9.97	175	977.8	980.3	979.05	2.1	1.7	26.4	0.925	27	144.48	24	1	0.586572	6.54347	91.7732	0.987751	0.303923	0.401179
5	9.97	175	977.8	980.3	979.05	2.1	1.7	26.4	0.925	27	144.48	24	1	0.586572	6.54347	91.7732	1.08197	0.303923	0.495395
6	9.97	175	977.8	980.3	979.05	2.1	1.7	26.4	0.925	27	144.48	24	1	0.586572	6.54347	91.7732	0.975594	0.303923	0.389022
1	9.65	175	964.9	962.8	963.85	2.1	0.3	22.6	0.126	24	91	15	1	0.0219535	0.306458	93.3153	0.0379736	0.0148334	0.0160201
2	9.65	175	964.9	962.8	963.85	2.1	0.3	22.6	0.126	24	91	15	1	0.0219535	0.306458	93.3153	0.0382702	0.0148334	0.0163168
3	9.65	175	964.9	962.8	963.85	2.1	0.3	22.6	0.126	24	91	15	1	0.0219535	0.306458	93.3153	0.0462803	0.0148334	0.0243268
4	9.65	175	964.9	962.8	963.85	2.1	0.3	22.6	0.126	24	91	15	1	0.0219535	0.306458	93.3153	0.0428686	0.0148334	0.0209151
5	9.65	175	964.9	962.8	963.85	2.1	0.3	22.6	0.126	24	91	15	1	0.0219535	0.306458	93.3153	0.0425719	0.0148334	0.0206185
6	9.65	175	964.9	962.8	963.85	2.1	0.3	22.6	0.126	24	91	15	1	0.0219535	0.306458	93.3153	0.0418302	0.0148334	0.0198768
1	9.65	175	968.7	973	970.85	4.3	2.7	28.5	0.251	27	169.68	28.5	1	0.393594	5.49436	93.3153	0.680812	0.265942	0.287217
2	9.65	175	968.7	973	970.85	4.3	2.7	28.5	0.251	27	169.68	28.5	1	0.393594	5.49436	93.3153	0.68613	0.265942	0.292536
3	9.65	175	968.7	973	970.85	4.3	2.7	28.5	0.251	27	169.68	28.5	1	0.393594	5.49436	93.3153	0.829739	0.265942	0.436145
4	9.65	175	968.7	973	970.85	4.3	2.7	28.5	0.251	27	169.68	28.5	1	0.393594	5.49436	93.3153	0.768572	0.265942	0.374978
5	9.65	175	968.7	973	970.85	4.3	2.7	28.5	0.251	27	169.68	28.5	1	0.393594	5.49436	93.3153	0.763254	0.265942	0.369659
6	9.65	175	968.7	973	970.85	4.3	2.7	28.5	0.251	27	169.68	28.5	1	0.393594	5.49436	93.3153	0.749956	0.265942	0.356362
1	8.4	175	953	956.7	954.85	3.2	2.5	30.1	0.622	22	201.04	34	1	1.55963	11.1491	87.7278	2.16187	0.51473	0.602234
2	8.4	175	953	956.7	954.85	3.2	2.5	30.1	0.622	22	201.04	34	1	1.55963	11.1491	87.7278	2.25452	0.51473	0.694886
3	8.4	175	953	956.7	954.85	3.2	2.5	30.1	0.622	22	201.04	34	1	1.55963	11.1491	87.7278	2.49129	0.51473	0.931662
4	8.4	175	953	956.7	954.85	3.2	2.5	30.1	0.622	22	201.04	34	1	1.55963	11.1491	87.7278	2.19275	0.51473	0.633118
5	8.4	175	953	956.7	954.85	3.2	2.5	30.1	0.622	22	201.04	34	1	1.55963	11.1491	87.7278	2.04348	0.51473	0.483846
6	8.4	175	953	956.7	954.85	3.2	2.5	30.1	0.622	22	201.04	34	1	1.55963	11.1491	87.7278	2.16187	0.51473	0.602234
1	8.4	175	966.4	968.9	967.65	2.5	2	30.3	0.733	21	201.32	34	1	1.47037	10.5109	87.7278	2.03813	0.48527	0.567766
2	8.4	175	966.4	968.9	967.65	2.5	2	30.3	0.733	21	201.32	34	1	1.47037	10.5109	87.7278	2.12548	0.48527	0.655114
3	8.4	175	966.4	968.9	967.65	2.5	2	30.3	0.733	21	201.32	34	1	1.47037	10.5109	87.7278	2.34871	0.48527	0.878338
4	8.4	175	966.4	968.9	967.65	2.5	2	30.3	0.733	21	201.32	34	1	1.47037	10.5109	87.7278	2.06725	0.48527	0.596882
5	8.4	175	966.4	968.9	967.65	2.5	2	30.3	0.733	21	201.32	34	1	1.47037	10.5109	87.7278	1.92652	0.48527	0.456154
6	8.4	175	966.4	968.9	967.65	2.5	2	30.3	0.733	21	201.32	34	1	1.47037	10.5109	87.7278	2.03813	0.48527	0.567766
1	11.33	150	909.4	911.5	910.45	2.1	1.2	31.3	1.004	21	70.28	11.5	1	0.361967	4.58812	92.6877	0.704758	0.239713	0.34279
2	11.33	150	909.4	911.5	910.45	2.1	1.2	31.3	1.004	21	70.28	11.5	1	0.361967	4.58812	92.6877	0.381144	0.239713	0.0191771
1	10.46	150	1042.3	1044.9	1043.6	2.6	1.7	29.4	0.33	26	53.48	8.5	1	0.293635	9.38059	96.9648	0.791766	0.524348	0.498131
2	10.46	150	1042.3	1044.9	1043.6	2.6	1.7	29.4	0.33	26	53.48	8.5	1	0.293635	9.38059	96.9648	0.891392	0.524348	0.597757
3	10.46	150	1042.3	1044.9	1043.6	2.6	1.7	29.4	0.33	26	53.48	8.5	1	0.293635	9.38059	96.9648	1.08016	0.524348	0.786522
4	10.46	150	1042.3	1044.9	1043.6	2.6	1.7	29.4	0.33	26	53.48	8.5	1	0.293635	9.38059	96.9648	1.71462	0.524348	1.42098
5	10.46	150	1042.3	1044.9	1043.6	2.6	1.7	29.4	0.33	26	53.48	8.5	1	0.293635	9.38059	96.9648	1.70937	0.524348	1.41574
6	10.46	150	1042.3	1044.9	1043.6	2.6	1.7	29.4	0.33	26	53.48	8.5	1	0.293635	9.38059	96.9648	1.95582	0.524348	1.66218
1	10.46	150	1065.9	1068.3	1067.1	2.4	0.5	29.6	0.309	26	114.8	19	1	0.0808674	2.58342	96.9648	0.218053	0.144406	0.137186
2	10.46	150	1065.9	1068.3	1067.1	2.4	0.5	29.6	0.309	26	114.8	19	1	0.0808674	2.58342	96.9648	0.24549	0.144406	0.164623
3	10.46	150	1065.9	1068.3	1067.1	2.4	0.5	29.6	0.309	26	114.8	19	1	0.0808674	2.58342	96.9648	0.297476	0.144406	0.216609
4	10.46	150	1065.9	1068.3	1067.1	2.4	0.5	29.6	0.309	26	114.8	19	1	0.0808674	2.58342	96.9648	0.472208	0.144406	0.39134
5	10.46	150	1065.9	1068.3	1067.1	2.4	0.5	29.6	0.309	26	114.8	19	1	0.0808674	2.58342	96.9648	0.470764	0.144406	0.389896
6	10.46	150	1065.9	1068.3	1067.1	2.4	0.5	29.6	0.309	26	114.8	19	1	0.0808674	2.58342	96.9648	0.538634	0.144406	0.457767
1	9.3	150	967.8	970.2	969	2.4	1.7	29.3	0.522	31	73.64	12	1	0.172957	1.48586	89.5735	1.86322	0.262056	1.69026
2	9.3	150	967.8	970.2	969	2.4	1.7	29.3	0.522	31	73.64	12	1	0.172957	1.48586	89.5735	1.83439	0.262056	1.66143
3	9.3	150	967.8	970.2	969	2.4	1.7	29.3	0.522	31	73.64	12	1	0.172957	1.48586	89.5735	1.58282	0.262056	1.40986
4	9.3	150	967.8	970.2	969	2.4	1.7	29.3	0.522	31	73.64	12	1	0.172957	1.48586	89.5735	1.28932	0.262056	1.11636
5	9.3	150	967.8	970.2	969	2.4	1.7	29.3	0.522	31	73.64	12	1	0.172957	1.48586	89.5735	0.946022	0.262056	0.773065
6	9.3	150	967.8	970.2	969	2.4	1.7	29.3	0.522	31	73.64	12	1	0.172957	1.48586	89.5735	1.86322	0.262056	1.69026
1	9.3	150	979.8	984	981.9	3.3	2.1	31.6	0.659	31	56	9	1	0.269726	2.31719	89.5735	2.90569	0.408676	2.63596
2	9.3	150	979.8	984	981.9	3.3	2.1	31.6	0.659	31	56	9	1	0.269726	2.31719	89.5735	2.86073	0.408676	2.59101
3	9.3	150	979.8	984	981.9	3.3	2.1	31.6	0.659	31	56	9	1	0.269726	2.31719	89.5735	2.4684	0.408676	2.19868
4	9.3	150	979.8	984	981.9	3.3	2.1	31.6	0.659	31	56	9	1	0.269726	2.31719	89.5735	2.01069	0.408676	1.74096
5	9.3	150	979.8	984	981.9	3.3	2.1	31.6	0.659	31	56	9	1	0.269726	2.31719	89.5735	1.47532	0.408676	1.20559
6	9.3	150	979.8	984	981.9	3.3	2.1	31.6	0.659	31	56	9	1	0.269726	2.31719	89.5735	2.90569	0.408676	2.63596
1	7.4	150	902.8	905.7	904.25	0.9	0.2	27.1	0.107	22	91.68	15	1	0.0101405	0.280285	96.5084	0.0287434	0.00729529	0.018603
2	7.4	150	902.8	905.7	904.25	0.9	0.2	27.1	0.107	22	91.68	15	1	0.0101405	0.280285	96.5084	0.0231261	0.00729529	0.0129856
3	7.4	150	902.8	905.7	904.25	0.9	0.2	27.1	0.107	22	91.68	15	1	0.0101405	0.280285	96.5084	0.0338501	0.00729529	0.0237097
4	7.4	150	902.8	905.7	904.25	0.9	0.2	27.1	0.107	22	91.68	15	1	0.0101405	0.280285	96.5084	0.0393216	0.00729529	0.0291812
5	7.4	150	902.8	905.7	904.25	0.9	0.2	27.1	0.107	22	91.68	15	1	0.0101405	0.280285	96.5084	0.0445013	0.00729529	0.0343608
6	7.4	150	902.8	905.7	904.25	0.9	0.2	27.1	0.107	22	91.68	15	1	0.0101405	0.280285	96.5084	0.0329747	0.00729529	0.0228343
1	9.64	150	919.2	921.7	920.45	2.5	1.1	28.6	0.461	23	84.84	14	1	0.25701	4.30107	94.3614	0.572597	0.0732222	0.315587
2	9.64	150	919.2	921.7	920.45	2.5	1.1	28.6	0.461	23	84.84	14	1	0.25701	4.30107	94.3614	0.576258	0.0732222	0.319249
3	9.64	150	919.2	921.7	920.45	2.5	1.1	28.6	0.461	23	84.84	14	1	0.25701	4.30107	94.3614	0.699272	0.0732222	0.442262
4	9.64	150	919.2	921.7	920.45	2.5	1.1	28.6	0.461	23	84.84	14	1	0.25701	4.30107	94.3614	0.700004	0.0732222	0.442994
5	9.64	150	919.2	921.7	920.45	2.5	1.1	28.6	0.461	23	84.84	14	1	0.25701	4.30107	94.3614	0.543308	0.0732222	0.286299
6	9.64	150	919.2	921.7	920.45	2.5	1.1	28.6	0.461	23	84.84	14	1	0.25701	4.30107	94.3614	0.442262	0.0732222	0.185252
1	10.24	150	1103.5	1106.5	1105	2.6	1.5	28.2	0.412	25	73.36	12	1	0.436807	8.00143	94.8235	1.09841	0.182765	0.661608
2	10.24	150	1103.5	1106.5	1105	2.6	1.5	28.2	0.412	25	73.36	12	1	0.436807	8.00143	94.8235	0.891891	0.182765	0.455084
3	10.24	150	1103.5	1106.5	1105	2.6	1.5	28.2	0.412	25	73.36	12	1	0.436807	8.00143	94.8235	0.804164	0.182765	0.367357
4	10.24	150	1103.5	1106.5	1105	2.6	1.5	28.2	0.412	25	73.36	12	1	0.436807	8.00143	94.8235	0.550121	0.182765	0.113314
6	10.24	150	1103.5	1106.5	1105	2.6	1.5	28.2	0.412	25	73.36	12	1	0.436807	8.00143	94.8235	0.445945	0.182765	0.00913823
1	10.24	150	1127.9	1131.4	1129.65	2.2	0.6	25.8	0.072	25	120.96	20	1	0.0305341	0.559323	94.8235	0.0767824	0.0127758	0.0462483
2	10.24	150	1127.9	1131.4	1129.65	2.2	0.6	25.8	0.072	25	120.96	20	1	0.0305341	0.559323	94.8235	0.0623458	0.0127758	0.0318117
3	10.24	150	1127.9	1131.4	1129.65	2.2	0.6	25.8	0.072	25	120.96	20	1	0.0305341	0.559323	94.8235	0.0562134	0.0127758	0.0256793
4	10.24	150	1127.9	1131.4	1129.65	2.2	0.6	25.8	0.072	25	120.96	20	1	0.0305341	0.559323	94.8235	0.0384551	0.0127758	0.00792098
6	10.24	150	1127.9	1131.4	1129.65	2.2	0.6	25.8	0.072	25	120.96	20	1	0.0305341	0.559323	94.8235	0.0311729	0.0127758	0.000638789
1	7.69	150	940.7	943.1	941.9	2.4	1	30.9	0.355	21	82.04	13.5	1	0.11294	5.41894	97.9584	0.990395	0.217192	0.877455
2	7.69	150	940.7	943.1	941.9	2.4	1	30.9	0.355	21	82.04	13.5	1	0.11294	5.41894	97.9584	1.08813	0.217192	0.975191
3	7.69	150	940.7	943.1	941.9	2.4	1	30.9	0.355	21	82.04	13.5	1	0.11294	5.41894	97.9584	0.831845	0.217192	0.718905
4	7.69	150	940.7	943.1	941.9	2.4	1	30.9	0.355	21	82.04	13.5	1	0.11294	5.41894	97.9584	1.16198	0.217192	1.04904
5	7.69	150	940.7	943.1	941.9	2.4	1	30.9	0.355	21	82.04	13.5	1	0.11294	5.41894	97.9584	1.44867	0.217192	1.33573
6	7.69	150	940.7	943.1	941.9	2.4	1	30.9	0.355	21	82.04	13.5	1	0.11294	5.41894	97.9584	1.31618	0.217192	1.20324
1	10.13	150	1014.8	1019.1	1016.95	4.3	2.7	28.5	0.199	23	70.56	11.5	1	0.236775	9.8339	97.6489	0.617675	0.257365	0.3809
2	10.13	150	1014.8	1019.1	1016.95	4.3	2.7	28.5	0.199	23	70.56	11.5	1	0.236775	9.8339	97.6489	0.872466	0.257365	0.63569
3	10.13	150	1014.8	1019.1	1016.95	4.3	2.7	28.5	0.199	23	70.56	11.5	1	0.236775	9.8339	97.6489	0.911071	0.257365	0.674295
4	10.13	150	1014.8	1019.1	1016.95	4.3	2.7	28.5	0.199	23	70.56	11.5	1	0.236775	9.8339	97.6489	0.805551	0.257365	0.568776
5	10.13	150	1014.8	1019.1	1016.95	4.3	2.7	28.5	0.199	23	70.56	11.5	1	0.236775	9.8339	97.6489	1.10409	0.257365	0.867319
6	10.13	150	1014.8	1019.1	1016.95	4.3	2.7	28.5	0.199	23	70.56	11.5	1	0.236775	9.8339	97.6489	0.890481	0.257365	0.653706
2	10.09	150	970.1	972.2	971.15	2.1	1.2	30.9	1.018	21	70.56	11.5	1	0.355477	4.82659	93.1402	0.742552	0.11285	0.387075
3	10.09	150	970.1	972.2	971.15	2.1	1.2	30.9	1.018	21	70.56	11.5	1	0.355477	4.82659	93.1402	0.699669	0.11285	0.344192
4	10.09	150	970.1	972.2	971.15	2.1	1.2	30.9	1.018	21	70.56	11.5	1	0.355477	4.82659	93.1402	1.00211	0.11285	0.64663
5	10.09	150	970.1	972.2	971.15	2.1	1.2	30.9	1.018	21	70.56	11.5	1	0.355477	4.82659	93.1402	0.750452	0.11285	0.394975
6	10.09	150	970.1	972.2	971.15	2.1	1.2	30.9	1.018	21	70.56	11.5	1	0.355477	4.82659	93.1402	0.442372	0.11285	0.0868944
2	10.09	106	988.6	990.9	989.75	2.3	1.8	32.5	0.716	22	70.56	11.5	1	0.375032	5.0921	93.1402	0.7834	0.119058	0.408368
3	10.09	106	988.6	990.9	989.75	2.3	1.8	32.5	0.716	22	70.56	11.5	1	0.375032	5.0921	93.1402	0.738158	0.119058	0.363126
4	10.09	106	988.6	990.9	989.75	2.3	1.8	32.5	0.716	22	70.56	11.5	1	0.375032	5.0921	93.1402	1.05723	0.119058	0.682201
5	10.09	106	988.6	990.9	989.75	2.3	1.8	32.5	0.716	22	70.56	11.5	1	0.375032	5.0921	93.1402	0.791734	0.119058	0.416702
6	10.09	106	988.6	990.9	989.75	2.3	1.8	32.5	0.716	22	70.56	11.5	1	0.375032	5.0921	93.1402	0.466706	0.119058	0.0916745
2	10.09	106	994.6	999.5	997.05	4.2	2.5	31.4	0.804	19	70.56	11.5	1	0.584896	7.94159	93.1402	1.22178	0.185681	0.636887
3	10.09	106	994.6	999.5	997.05	4.2	2.5	31.4	0.804	19	70.56	11.5	1	0.584896	7.94159	93.1402	1.15122	0.185681	0.566328
4	10.09	106	994.6	999.5	997.05	4.2	2.5	31.4	0.804	19	70.56	11.5	1	0.584896	7.94159	93.1402	1.64885	0.185681	1.06395
5	10.09	106	994.6	999.5	997.05	4.2	2.5	31.4	0.804	19	70.56	11.5	1	0.584896	7.94159	93.1402	1.23478	0.185681	0.649885
6	10.09	106	994.6	999.5	997.05	4.2	2.5	31.4	0.804	19	70.56	11.5	1	0.584896	7.94159	93.1402	0.727871	0.185681	0.142975
1	10.24	150	1119.6	1121	1120.3	1.4	1.2	28.4	0.321	26	91.28	15	1	0.370339	3.80191	91.1238	2.29325	0.118698	1.92291
2	10.24	150	1119.6	1121	1120.3	1.4	1.2	28.4	0.321	26	91.28	15	1	0.370339	3.80191	91.1238	1.81134	0.118698	1.441
3	10.24	150	1119.6	1121	1120.3	1.4	1.2	28.4	0.321	26	91.28	15	1	0.370339	3.80191	91.1238	1.36384	0.118698	0.993505
4	10.24	150	1119.6	1121	1120.3	1.4	1.2	28.4	0.321	26	91.28	15	1	0.370339	3.80191	91.1238	1.32349	0.118698	0.953148
5	10.24	150	1119.6	1121	1120.3	1.4	1.2	28.4	0.321	26	91.28	15	1	0.370339	3.80191	91.1238	0.92466	0.118698	0.554321
6	10.24	150	1119.6	1121	1120.3	1.4	1.2	28.4	0.321	26	91.28	15	1	0.370339	3.80191	91.1238	0.718125	0.118698	0.347786
1	10.24	150	1137.8	1139.3	1138.55	1.5	1	29.1	0.378	27	62.44	10	1	0.363417	3.73085	91.1238	2.25039	0.11648	1.88697
2	10.24	150	1137.8	1139.3	1138.55	1.5	1	29.1	0.378	27	62.44	10	1	0.363417	3.73085	91.1238	1.77748	0.11648	1.41406
3	10.24	150	1137.8	1139.3	1138.55	1.5	1	29.1	0.378	27	62.44	10	1	0.363417	3.73085	91.1238	1.33835	0.11648	0.974935
4	10.24	150	1137.8	1139.3	1138.55	1.5	1	29.1	0.378	27	62.44	10	1	0.363417	3.73085	91.1238	1.29875	0.11648	0.935332
5	10.24	150	1137.8	1139.3	1138.55	1.5	1	29.1	0.378	27	62.44	10	1	0.363417	3.73085	91.1238	0.907377	0.11648	0.54396
6	10.24	150	1137.8	1139.3	1138.55	1.5	1	29.1	0.378	27	62.44	10	1	0.363417	3.73085	91.1238	0.704702	0.11648	0.341286
1	9.64	150	952.2	954.1	953.15	1.9	1.8	30.4	0.639	27	140.56	23.5	1	0.308793	5.34724	94.5405	0.515396	0.222154	0.206603
2	9.64	150	952.2	954.1	953.15	1.9	1.8	30.4	0.639	27	140.56	23.5	1	0.308793	5.34724	94.5405	0.519839	0.222154	0.211046
3	9.64	150	952.2	954.1	953.15	1.9	1.8	30.4	0.639	27	140.56	23.5	1	0.308793	5.34724	94.5405	0.486516	0.222154	0.177723
5	9.64	150	952.2	954.1	953.15	1.9	1.8	30.4	0.639	27	140.56	23.5	1	0.308793	5.34724	94.5405	0.328787	0.222154	0.0199938
6	9.64	150	952.2	954.1	953.15	1.9	1.8	30.4	0.639	27	140.56	23.5	1	0.308793	5.34724	94.5405	0.322123	0.222154	0.0133292
1	12.64	150	1089.6	1091.6	1090.6	2	1.8	30.6	0.41	25	61.88	10	1	0.37746	8.82952	95.9003	0.709397	0.189678	0.331937
2	12.64	150	1089.6	1091.6	1090.6	2	1.8	30.6	0.41	25	61.88	10	1	0.37746	8.82952	95.9003	0.648699	0.189678	0.27124
3	12.64	150	1089.6	1091.6	1090.6	2	1.8	30.6	0.41	25	61.88	10	1	0.37746	8.82952	95.9003	0.493163	0.189678	0.115704
4	12.64	150	1089.6	1091.6	1090.6	2	1.8	30.6	0.41	25	61.88	10	1	0.37746	8.82952	95.9003	0.498854	0.189678	0.121394
5	12.64	150	1089.6	1091.6	1090.6	2	1.8	30.6	0.41	25	61.88	10	1	0.37746	8.82952	95.9003	0.428673	0.189678	0.0512131
6	12.64	150	1089.6	1091.6	1090.6	2	1.8	30.6	0.41	25	61.88	10	1	0.37746	8.82952	95.9003	0.608867	0.189678	0.231407
1	12.64	150	1096	1097.4	1096.7	1.4	1	19.3	0.409	25	115.36	19	1	0.209188	4.89333	95.9003	0.393148	0.10512	0.18396
2	12.64	150	1096	1097.4	1096.7	1.4	1	19.3	0.409	25	115.36	19	1	0.209188	4.89333	95.9003	0.35951	0.10512	0.150321
3	12.64	150	1096	1097.4	1096.7	1.4	1	19.3	0.409	25	115.36	19	1	0.209188	4.89333	95.9003	0.273311	0.10512	0.0641231
4	12.64	150	1096	1097.4	1096.7	1.4	1	19.3	0.409	25	115.36	19	1	0.209188	4.89333	95.9003	0.276465	0.10512	0.0672767
5	12.64	150	1096	1097.4	1096.7	1.4	1	19.3	0.409	25	115.36	19	1	0.209188	4.89333	95.9003	0.237571	0.10512	0.0283823
6	12.64	150	1096	1097.4	1096.7	1.4	1	19.3	0.409	25	115.36	19	1	0.209188	4.89333	95.9003	0.337434	0.10512	0.128246
1	8.94	175	989.8	991.2	990.5	1.4	0.4	30.1	0.166	30	310	40	1	0.104428	3.24409	96.8814	0.998892	0.0401645	0.894464
2	8.94	175	989.8	991.2	990.5	1.4	0.4	30.1	0.166	30	310	40	1	0.104428	3.24409	96.8814	0.846668	0.0401645	0.742241
3	8.94	175	989.8	991.2	990.5	1.4	0.4	30.1	0.166	30	310	40	1	0.104428	3.24409	96.8814	0.544631	0.0401645	0.440203
4	8.94	175	989.8	991.2	990.5	1.4	0.4	30.1	0.166	30	310	40	1	0.104428	3.24409	96.8814	0.466712	0.0401645	0.362284
5	8.94	175	989.8	991.2	990.5	1.4	0.4	30.1	0.166	30	310	40	1	0.104428	3.24409	96.8814	0.334571	0.0401645	0.230143
6	8.94	175	989.8	991.2	990.5	1.4	0.4	30.1	0.166	30	310	40	1	0.104428	3.24409	96.8814	0.218495	0.0401645	0.114067
1	10.77	175	955.4	961.2	958.3	4.2	1.6	30.5	1.013	19	273.84	46	1	0.569274	9.94492	94.5857	0.879301	0.267265	0.310027
2	10.77	175	955.4	961.2	958.3	4.2	1.6	30.5	1.013	19	273.84	46	1	0.569274	9.94492	94.5857	0.76705	0.267265	0.197776
4	10.77	175	955.4	961.2	958.3	4.2	1.6	30.5	1.013	19	273.84	46	1	0.569274	9.94492	94.5857	1.38443	0.267265	0.815157
5	10.77	175	955.4	961.2	958.3	4.2	1.6	30.5	1.013	19	273.84	46	1	0.569274	9.94492	94.5857	1.49935	0.267265	0.930081
6	10.77	175	955.4	961.2	958.3	4.2	1.6	30.5	1.013	19	273.84	46	1	0.569274	9.94492	94.5857	1.86283	0.267265	1.29356
1	10.77	175	955.3	959.7	957.5	4.4	2.1	29.5	0.436	26	202.16	34	1	1.59522	26.7101	94.3642	2.77064	0.559726	1.17542
2	10.77	175	955.3	959.7	957.5	4.4	2.1	29.5	0.436	26	202.16	34	1	1.59522	26.7101	94.3642	2.61952	0.559726	1.0243
3	10.77	175	955.3	959.7	957.5	4.4	2.1	29.5	0.436	26	202.16	34	1	1.59522	26.7101	94.3642	2.66989	0.559726	1.07467
4	10.77	175	955.3	959.7	957.5	4.4	2.1	29.5	0.436	26	202.16	34	1	1.59522	26.7101	94.3642	2.6475	0.559726	1.05229
5	10.77	175	955.3	959.7	957.5	4.4	2.1	29.5	0.436	26	202.16	34	1	1.59522	26.7101	94.3642	3.01133	0.559726	1.41611
6	10.77	175	955.3	959.7	957.5	4.4	2.1	29.5	0.436	26	202.16	34	1	1.59522	26.7101	94.3642	3.41993	0.559726	1.82471
1	7.92	125	941.3	943.9	942.6	1.7	0.6	27.8	0.105	23	91	15	1	0.0799282	3.54399	97.7944	0.277487	0.0754039	0.197558
2	7.92	125	941.3	943.9	942.6	1.7	0.6	27.8	0.105	23	91	15	1	0.0799282	3.54399	97.7944	0.249587	0.0754039	0.169659
3	7.92	125	941.3	943.9	942.6	1.7	0.6	27.8	0.105	23	91	15	1	0.0799282	3.54399	97.7944	0.128941	0.0754039	0.0490126
4	7.92	125	941.3	943.9	942.6	1.7	0.6	27.8	0.105	23	91	15	1	0.0799282	3.54399	97.7944	0.100287	0.0754039	0.0203591
5	7.92	125	941.3	943.9	942.6	1.7	0.6	27.8	0.105	23	91	15	1	0.0799282	3.54399	97.7944	0.265422	0.0754039	0.185494
6	7.92	125	941.3	943.9	942.6	1.7	0.6	27.8	0.105	23	91	15	1	0.0799282	3.54399	97.7944	0.19605	0.0754039	0.116122
1	7.92	125	949.6	950.6	950.1	0.7	0.2	26.2	0.062	17	91	15	1	0.0157319	0.697546	97.7944	0.0546164	0.0148414	0.0388845
2	7.92	125	949.6	950.6	950.1	0.7	0.2	26.2	0.062	17	91	15	1	0.0157319	0.697546	97.7944	0.0491251	0.0148414	0.0333932
3	7.92	125	949.6	950.6	950.1	0.7	0.2	26.2	0.062	17	91	15	1	0.0157319	0.697546	97.7944	0.0253788	0.0148414	0.00964692
4	7.92	125	949.6	950.6	950.1	0.7	0.2	26.2	0.062	17	91	15	1	0.0157319	0.697546	97.7944	0.0197391	0.0148414	0.00400718
5	7.92	125	949.6	950.6	950.1	0.7	0.2	26.2	0.062	17	91	15	1	0.0157319	0.697546	97.7944	0.0522418	0.0148414	0.0365099
6	7.92	125	949.6	950.6	950.1	0.7	0.2	26.2	0.062	17	91	15	1	0.0157319	0.697546	97.7944	0.0385877	0.0148414	0.0228558
1	8.94	175	974.9	977.9	976.4	2.5	0.3	28.2	0.21	26	280	40	1	0.00451554	0.350431	98.7278	0.0210513	0.00635991	0.0165358
2	8.94	175	974.9	977.9	976.4	2.5	0.3	28.2	0.21	26	280	40	1	0.00451554	0.350431	98.7278	0.0419754	0.00635991	0.0374599
3	8.94	175	974.9	977.9	976.4	2.5	0.3	28.2	0.21	26	280	40	1	0.00451554	0.350431	98.7278	0.042675	0.00635991	0.0381595
4	8.94	175	974.9	977.9	976.4	2.5	0.3	28.2	0.21	26	280	40	1	0.00451554	0.350431	98.7278	0.0350431	0.00635991	0.0305276
5	8.94	175	974.9	977.9	976.4	2.5	0.3	28.2	0.21	26	280	40	1	0.00451554	0.350431	98.7278	0.0255032	0.00635991	0.0209877
6	8.94	175	974.9	977.9	976.4	2.5	0.3	28.2	0.21	26	280	40	1	0.00451554	0.350431	98.7278	0.0302732	0.00635991	0.0257576
1	10.19	175	925.5	929.6	927.55	4.1	3	31.6	0.587	23	91	15	1	0.311593	0.673041	68.3544	1.01704	0.124637	0.705447
2	10.19	175	925.5	929.6	927.55	4.1	3	31.6	0.587	23	91	15	1	0.311593	0.673041	68.3544	1.2015	0.124637	0.88991
3	10.19	175	925.5	929.6	927.55	4.1	3	31.6	0.587	23	91	15	1	0.311593	0.673041	68.3544	1.13669	0.124637	0.825099
4	10.19	175	925.5	929.6	927.55	4.1	3	31.6	0.587	23	91	15	1	0.311593	0.673041	68.3544	1.07313	0.124637	0.761534
5	10.19	175	925.5	929.6	927.55	4.1	3	31.6	0.587	23	91	15	1	0.311593	0.673041	68.3544	1.02452	0.124637	0.712925
6	10.19	175	925.5	929.6	927.55	4.1	3	31.6	0.587	23	91	15	1	0.311593	0.673041	68.3544	1.03947	0.124637	0.727882
1	10.19	175	938.1	941.4	939.75	3.3	2.6	31.7	0.716	23	114.24	19	1	0.329393	0.71149	68.3544	1.07514	0.131757	0.745747
2	10.19	175	938.1	941.4	939.75	3.3	2.6	31.7	0.716	23	114.24	19	1	0.329393	0.71149	68.3544	1.27014	0.131757	0.940748
3	10.19	175	938.1	941.4	939.75	3.3	2.6	31.7	0.716	23	114.24	19	1	0.329393	0.71149	68.3544	1.20163	0.131757	0.872234
4	10.19	175	938.1	941.4	939.75	3.3	2.6	31.7	0.716	23	114.24	19	1	0.329393	0.71149	68.3544	1.13443	0.131757	0.805038
5	10.19	175	938.1	941.4	939.75	3.3	2.6	31.7	0.716	23	114.24	19	1	0.329393	0.71149	68.3544	1.08305	0.131757	0.753652
6	10.19	175	938.1	941.4	939.75	3.3	2.6	31.7	0.716	23	114.24	19	1	0.329393	0.71149	68.3544	1.09886	0.131757	0.769463
1	11.08	175	954.5	959.7	957.1	2.3	0.2	24.1	0.03	22	161.28	28.5	1	0.00487405	0.0945148	95.096	0.0119243	0.00149054	0.00705023
2	11.08	175	954.5	959.7	957.1	2.3	0.2	24.1	0.03	22	161.28	28.5	1	0.00487405	0.0945148	95.096	0.0152929	0.00149054	0.0104188
3	11.08	175	954.5	959.7	957.1	2.3	0.2	24.1	0.03	22	161.28	28.5	1	0.00487405	0.0945148	95.096	0.0153823	0.00149054	0.0105083
4	11.08	175	954.5	959.7	957.1	2.3	0.2	24.1	0.03	22	161.28	28.5	1	0.00487405	0.0945148	95.096	0.0122522	0.00149054	0.00737815
5	11.08	175	954.5	959.7	957.1	2.3	0.2	24.1	0.03	22	161.28	28.5	1	0.00487405	0.0945148	95.096	0.0123267	0.00149054	0.00745268
6	11.08	175	954.5	959.7	957.1	2.3	0.2	24.1	0.03	22	161.28	28.5	1	0.00487405	0.0945148	95.096	0.0126546	0.00149054	0.00778059
1	8.6	175	967.5	970.6	969.05	2.3	1.2	28.8	0.3454	29	340.45	50	1	0.17687	18.2918	99.0423	0.241677	0.135015	0.0648072
2	8.6	175	967.5	970.6	969.05	2.3	1.2	28.8	0.3454	29	340.45	50	1	0.17687	18.2918	99.0423	0.843844	0.135015	0.666974
3	8.6	175	967.5	970.6	969.05	2.3	1.2	28.8	0.3454	29	340.45	50	1	0.17687	18.2918	99.0423	0.63187	0.135015	0.455001
4	8.6	175	967.5	970.6	969.05	2.3	1.2	28.8	0.3454	29	340.45	50	1	0.17687	18.2918	99.0423	0.527909	0.135015	0.351039
5	8.6	175	967.5	970.6	969.05	2.3	1.2	28.8	0.3454	29	340.45	50	1	0.17687	18.2918	99.0423	0.911352	0.135015	0.734482
6	8.6	175	967.5	970.6	969.05	2.3	1.2	28.8	0.3454	29	340.45	50	1	0.17687	18.2918	99.0423	1.01261	0.135015	0.835743
3	10.05	125	947	952.3	949.65	4.8	3.9	31.2	0.915	24	38.64	6	1	0.776969	23.908	96.8525	1.46761	0.539562	0.690639
5	10.05	125	947	952.3	949.65	4.8	3.9	31.2	0.915	24	38.64	6	1	0.776969	23.908	96.8525	2.74637	0.539562	1.9694
6	10.05	125	947	952.3	949.65	4.8	3.9	31.2	0.915	24	38.64	6	1	0.776969	23.908	96.8525	1.83991	0.539562	1.06294
3	10.05	125	965.4	967.6	966.5	2	1.6	30.4	0.402	22	70.32	11.5	1	0.140044	4.30927	96.8525	0.264527	0.0972527	0.124483
5	10.05	125	965.4	967.6	966.5	2	1.6	30.4	0.402	22	70.32	11.5	1	0.140044	4.30927	96.8525	0.495016	0.0972527	0.354972
6	10.05	125	965.4	967.6	966.5	2	1.6	30.4	0.402	22	70.32	11.5	1	0.140044	4.30927	96.8525	0.331632	0.0972527	0.191588
1	11.54	150	1061	1062.4	1061.7	1.4	0.8	29.3	0.199	0	70.84	11.5	1	0.104673	2.0913	95.2334	0.246035	0.10791	0.141362
1	11.54	150	1084.8	1088.7	1086.75	2.9	1.5	29.2	0.659	0	70.84	11.5	1	0.649932	12.9852	95.2334	1.52768	0.670033	0.877744
1	11.61	175	959.1	963	961.05	3.9	3.2	29	0.25	23	73.92	12	1	0.438527	1.91327	81.3535	0.64666	0.111301	0.208133
1	9.95	150	926.7	930.1	928.4	3.4	1.7	29.4	0.697	15	70.8	11.5	1	0.349504	7.91112	95.769	1.09374	0.411181	0.744237
2	9.95	150	926.7	930.1	928.4	3.4	1.7	29.4	0.697	15	70.8	11.5	1	0.349504	7.91112	95.769	0.657889	0.411181	0.308386
6	9.95	150	926.7	930.1	928.4	3.4	1.7	29.4	0.697	15	70.8	11.5	1	0.349504	7.91112	95.769	0.38651	0.411181	0.0370063
1	9.95	150	933.9	939.9	936.9	4.8	2.8	31.6	0.606	14	70.8	11.5	1	0.500496	11.3289	95.769	1.56626	0.588819	1.06576
2	9.95	150	933.9	939.9	936.9	4.8	2.8	31.6	0.606	14	70.8	11.5	1	0.500496	11.3289	95.769	0.942111	0.588819	0.441614
6	9.95	150	933.9	939.9	936.9	4.8	2.8	31.6	0.606	14	70.8	11.5	1	0.500496	11.3289	95.769	0.55349	0.588819	0.0529937
1	7.4	150	879.7	882.8	881.25	1.5	0.2	26.4	0.039	17	90.72	15	1	0.00356781	0.023539	86.838	0.00466232	0.00142144	0.00109451
2	7.4	150	879.7	882.8	881.25	1.5	0.2	26.4	0.039	17	90.72	15	1	0.00356781	0.023539	86.838	0.00358202	0.00142144	1.42144e-05
4	7.4	150	879.7	882.8	881.25	1.5	0.2	26.4	0.039	17	90.72	15	1	0.00356781	0.023539	86.838	0.0182228	0.00142144	0.014655
5	7.4	150	879.7	882.8	881.25	1.5	0.2	26.4	0.039	17	90.72	15	1	0.00356781	0.023539	86.838	0.0131625	0.00142144	0.00959471
6	7.4	150	879.7	882.8	881.25	1.5	0.2	26.4	0.039	17	90.72	15	1	0.00356781	0.023539	86.838	0.0110588	0.00142144	0.00749098
1	7.4	150	893.8	895.5	894.65	1.7	1.2	30.6	0.72	19	90.72	15	1	0.395204	2.6074	86.838	0.516441	0.157452	0.121238
2	7.4	150	893.8	895.5	894.65	1.7	1.2	30.6	0.72	19	90.72	15	1	0.395204	2.6074	86.838	0.396778	0.157452	0.00157452
4	7.4	150	893.8	895.5	894.65	1.7	1.2	30.6	0.72	19	90.72	15	1	0.395204	2.6074	86.838	2.01853	0.157452	1.62333
5	7.4	150	893.8	895.5	894.65	1.7	1.2	30.6	0.72	19	90.72	15	1	0.395204	2.6074	86.838	1.458	0.157452	1.0628
6	7.4	150	893.8	895.5	894.65	1.7	1.2	30.6	0.72	19	90.72	15	1	0.395204	2.6074	86.838	1.22497	0.157452	0.82977
1	7.4	150	906.6	909.2	907.9	1.9	1.3	28.5	0.205	28	91	15	1	0.1219	0.80425	86.838	0.159296	0.0485658	0.0373957
2	7.4	150	906.6	909.2	907.9	1.9	1.3	28.5	0.205	28	91	15	1	0.1219	0.80425	86.838	0.122386	0.0485658	0.000485658
4	7.4	150	906.6	909.2	907.9	1.9	1.3	28.5	0.205	28	91	15	1	0.1219	0.80425	86.838	0.622614	0.0485658	0.500713
5	7.4	150	906.6	909.2	907.9	1.9	1.3	28.5	0.205	28	91	15	1	0.1219	0.80425	86.838	0.449719	0.0485658	0.327819
6	7.4	150	906.6	909.2	907.9	1.9	1.3	28.5	0.205	28	91	15	1	0.1219	0.80425	86.838	0.377842	0.0485658	0.255942
2	9.86	150	871.5	879.8	875.65	7.3	5	30.4	0.63	20	70.28	11.5	1	0.714497	18.3905	96.2602	1.29438	0.517751	0.579882
3	9.86	150	871.5	879.8	875.65	7.3	5	30.4	0.63	20	70.28	11.5	1	0.714497	18.3905	96.2602	1.18565	0.517751	0.471154
4	9.86	150	871.5	879.8	875.65	7.3	5	30.4	0.63	20	70.28	11.5	1	0.714497	18.3905	96.2602	1.02515	0.517751	0.310651
5	9.86	150	871.5	879.8	875.65	7.3	5	30.4	0.63	20	70.28	11.5	1	0.714497	18.3905	96.2602	0.994083	0.517751	0.279586
6	9.86	150	871.5	879.8	875.65	7.3	5	30.4	0.63	20	70.28	11.5	1	0.714497	18.3905	96.2602	0.802515	0.517751	0.0880178
2	9.86	150	882.9	885.5	884.2	2.6	0.2	28	0.067	21	113.68	19	1	0.00303945	0.0782327	96.2602	0.00550625	0.0022025	0.0024668
3	9.86	150	882.9	885.5	884.2	2.6	0.2	28	0.067	21	113.68	19	1	0.00303945	0.0782327	96.2602	0.00504372	0.0022025	0.00200427
4	9.86	150	882.9	885.5	884.2	2.6	0.2	28	0.067	21	113.68	19	1	0.00303945	0.0782327	96.2602	0.00436095	0.0022025	0.0013215
5	9.86	150	882.9	885.5	884.2	2.6	0.2	28	0.067	21	113.68	19	1	0.00303945	0.0782327	96.2602	0.0042288	0.0022025	0.00118935
6	9.86	150	882.9	885.5	884.2	2.6	0.2	28	0.067	21	113.68	19	1	0.00303945	0.0782327	96.2602	0.00341387	0.0022025	0.000374425
3	10.05	125	961.4	963.9	962.65	1.4	0.8	31.6	0.359	35	105.84	17.5	1	0.0820395	0.931707	91.9073	0.101683	0.0385162	0.0196433
1	9.3	150	953.6	958	955.8	4.4	3.5	31.4	0.311	23	91	15	1	0.439869	3.88008	89.8177	0.541691	0.135762	0.101822
3	9.3	150	953.6	958	955.8	4.4	3.5	31.4	0.311	23	91	15	1	0.439869	3.88008	89.8177	0.538976	0.135762	0.0991064
4	9.3	150	953.6	958	955.8	4.4	3.5	31.4	0.311	23	91	15	1	0.439869	3.88008	89.8177	0.598711	0.135762	0.158842
5	9.3	150	953.6	958	955.8	4.4	3.5	31.4	0.311	23	91	15	1	0.439869	3.88008	89.8177	2.12332	0.135762	1.68345
6	9.3	150	953.6	958	955.8	4.4	3.5	31.4	0.311	23	91	15	1	0.439869	3.88008	89.8177	1.29789	0.135762	0.858017
1	8.72	175	1000.1	1002.8	1001.45	2.7	2	28.9	0.751	22	114.8	19	1	0.561823	5.14284	90.1515	1.43071	0.227459	0.868892
2	8.72	175	1000.1	1002.8	1001.45	2.7	2	28.9	0.751	22	114.8	19	1	0.561823	5.14284	90.1515	1.34883	0.227459	0.787007
3	8.72	175	1000.1	1002.8	1001.45	2.7	2	28.9	0.751	22	114.8	19	1	0.561823	5.14284	90.1515	1.18278	0.227459	0.620962
4	8.72	175	1000.1	1002.8	1001.45	2.7	2	28.9	0.751	22	114.8	19	1	0.561823	5.14284	90.1515	1.06223	0.227459	0.500409
5	8.72	175	1000.1	1002.8	1001.45	2.7	2	28.9	0.751	22	114.8	19	1	0.561823	5.14284	90.1515	1.18506	0.227459	0.623237
6	8.72	175	1000.1	1002.8	1001.45	2.7	2	28.9	0.751	22	114.8	19	1	0.561823	5.14284	90.1515	1.22145	0.227459	0.65963
1	8.72	175	1009.4	1010.8	1010.1	1.4	1.4	29.9	0.995	28	91.28	15	1	0.521051	4.76962	90.1515	1.32689	0.210952	0.805836
2	8.72	175	1009.4	1010.8	1010.1	1.4	1.4	29.9	0.995	28	91.28	15	1	0.521051	4.76962	90.1515	1.25094	0.210952	0.729894
3	8.72	175	1009.4	1010.8	1010.1	1.4	1.4	29.9	0.995	28	91.28	15	1	0.521051	4.76962	90.1515	1.09695	0.210952	0.575899
4	8.72	175	1009.4	1010.8	1010.1	1.4	1.4	29.9	0.995	28	91.28	15	1	0.521051	4.76962	90.1515	0.985146	0.210952	0.464094
5	8.72	175	1009.4	1010.8	1010.1	1.4	1.4	29.9	0.995	28	91.28	15	1	0.521051	4.76962	90.1515	1.09906	0.210952	0.578008
6	8.72	175	1009.4	1010.8	1010.1	1.4	1.4	29.9	0.995	28	91.28	15	1	0.521051	4.76962	90.1515	1.13281	0.210952	0.611761
1	8.72	175	1018	1020	1019	2	1.4	28.7	0.294	25	140.28	23.5	1	0.153959	1.40932	90.1515	0.392065	0.0623315	0.238106
2	8.72	175	1018	1020	1019	2	1.4	28.7	0.294	25	140.28	23.5	1	0.153959	1.40932	90.1515	0.369626	0.0623315	0.215667
3	8.72	175	1018	1020	1019	2	1.4	28.7	0.294	25	140.28	23.5	1	0.153959	1.40932	90.1515	0.324124	0.0623315	0.170165
4	8.72	175	1018	1020	1019	2	1.4	28.7	0.294	25	140.28	23.5	1	0.153959	1.40932	90.1515	0.291088	0.0623315	0.137129
5	8.72	175	1018	1020	1019	2	1.4	28.7	0.294	25	140.28	23.5	1	0.153959	1.40932	90.1515	0.324747	0.0623315	0.170788
6	8.72	175	1018	1020	1019	2	1.4	28.7	0.294	25	140.28	23.5	1	0.153959	1.40932	90.1515	0.33472	0.0623315	0.180761
3	9.33	125	925.9	928.9	927.4	2.5	1	26.4	0.111	20	91	15	1	0.0245536	0.186314	88.3559	0.0671377	0.00732944	0.0425841
5	9.33	125	925.9	928.9	927.4	2.5	1	26.4	0.111	20	91	15	1	0.0245536	0.186314	88.3559	0.0716086	0.00732944	0.047055
6	9.33	125	925.9	928.9	927.4	2.5	1	26.4	0.111	20	91	15	1	0.0245536	0.186314	88.3559	0.070949	0.00732944	0.0463954
3	9.33	125	939.9	942.9	941.4	3	1.4	31.2	0.953	19	52.8	8.5	1	0.29513	2.23947	88.3559	0.806983	0.0880986	0.511853
5	9.33	125	939.9	942.9	941.4	3	1.4	31.2	0.953	19	52.8	8.5	1	0.29513	2.23947	88.3559	0.860723	0.0880986	0.565593
6	9.33	125	939.9	942.9	941.4	3	1.4	31.2	0.953	19	52.8	8.5	1	0.29513	2.23947	88.3559	0.852794	0.0880986	0.557664
1	10	125	943.1	947.8	945.45	2	0.5	29.5	0.167	24	73.36	15	1	0.0670969	0.204622	75.3065	0.125311	0.0158622	0.0582141
2	10	125	943.1	947.8	945.45	2	0.5	29.5	0.167	24	73.36	15	1	0.0670969	0.204622	75.3065	0.124042	0.0158622	0.0569452
3	10	125	943.1	947.8	945.45	2	0.5	29.5	0.167	24	73.36	15	1	0.0670969	0.204622	75.3065	0.133242	0.0158622	0.0661452
4	10	125	943.1	947.8	945.45	2	0.5	29.5	0.167	24	73.36	15	1	0.0670969	0.204622	75.3065	0.155608	0.0158622	0.0885109
5	10	125	943.1	947.8	945.45	2	0.5	29.5	0.167	24	73.36	15	1	0.0670969	0.204622	75.3065	0.162904	0.0158622	0.0958075
6	10	125	943.1	947.8	945.45	2	0.5	29.5	0.167	24	73.36	15	1	0.0670969	0.204622	75.3065	0.144187	0.0158622	0.0770901
1	10	125	960.3	962.9	961.6	2.6	2.2	29.6	0.323	21	59.36	9.5	1	0.571007	1.74137	75.3065	1.06642	0.13499	0.495413
2	10	125	960.3	962.9	961.6	2.6	2.2	29.6	0.323	21	59.36	9.5	1	0.571007	1.74137	75.3065	1.05562	0.13499	0.484614
3	10	125	960.3	962.9	961.6	2.6	2.2	29.6	0.323	21	59.36	9.5	1	0.571007	1.74137	75.3065	1.13391	0.13499	0.562908
4	10	125	960.3	962.9	961.6	2.6	2.2	29.6	0.323	21	59.36	9.5	1	0.571007	1.74137	75.3065	1.32425	0.13499	0.753243
5	10	125	960.3	962.9	961.6	2.6	2.2	29.6	0.323	21	59.36	9.5	1	0.571007	1.74137	75.3065	1.38635	0.13499	0.815339
6	10	125	960.3	962.9	961.6	2.6	2.2	29.6	0.323	21	59.36	9.5	1	0.571007	1.74137	75.3065	1.22706	0.13499	0.656051
1	10.64	150	910.1	913.3	911.7	3.2	0.9	29.4	0.207	21	90.72	15	1	0.108942	2.73565	96.1702	0.292374	0.0931128	0.183432
2	10.64	150	910.1	913.3	911.7	3.2	0.9	29.4	0.207	21	90.72	15	1	0.108942	2.73565	96.1702	0.33893	0.0931128	0.229989
3	10.64	150	910.1	913.3	911.7	3.2	0.9	29.4	0.207	21	90.72	15	1	0.108942	2.73565	96.1702	0.244887	0.0931128	0.135945
4	10.64	150	910.1	913.3	911.7	3.2	0.9	29.4	0.207	21	90.72	15	1	0.108942	2.73565	96.1702	0.189019	0.0931128	0.080077
5	10.64	150	910.1	913.3	911.7	3.2	0.9	29.4	0.207	21	90.72	15	1	0.108942	2.73565	96.1702	0.139669	0.0931128	0.0307272
1	10.64	150	916.2	918.2	917.2	1.6	1.1	29.3	0.281	24	90.72	15	1	0.180751	4.53886	96.1702	0.485093	0.154488	0.304342
2	10.64	150	916.2	918.2	917.2	1.6	1.1	29.3	0.281	24	90.72	15	1	0.180751	4.53886	96.1702	0.562337	0.154488	0.381586
3	10.64	150	916.2	918.2	917.2	1.6	1.1	29.3	0.281	24	90.72	15	1	0.180751	4.53886	96.1702	0.406304	0.154488	0.225553
4	10.64	150	916.2	918.2	917.2	1.6	1.1	29.3	0.281	24	90.72	15	1	0.180751	4.53886	96.1702	0.313611	0.154488	0.13286
5	10.64	150	916.2	918.2	917.2	1.6	1.1	29.3	0.281	24	90.72	15	1	0.180751	4.53886	96.1702	0.231732	0.154488	0.0509811
1	10.64	150	920.2	924.1	922.15	3.9	2.6	31.7	0.579	21	114.52	19	1	0.880307	22.1055	96.1702	2.36253	0.752399	1.48223
2	10.64	150	920.2	924.1	922.15	3.9	2.6	31.7	0.579	21	114.52	19	1	0.880307	22.1055	96.1702	2.73873	0.752399	1.85843
3	10.64	150	920.2	924.1	922.15	3.9	2.6	31.7	0.579	21	114.52	19	1	0.880307	22.1055	96.1702	1.97881	0.752399	1.0985
4	10.64	150	920.2	924.1	922.15	3.9	2.6	31.7	0.579	21	114.52	19	1	0.880307	22.1055	96.1702	1.52737	0.752399	0.647063
5	10.64	150	920.2	924.1	922.15	3.9	2.6	31.7	0.579	21	114.52	19	1	0.880307	22.1055	96.1702	1.1286	0.752399	0.248292
2	9.97	175	989.2	994.5	991.85	4.8	3.4	30.2	0.75	22	70.8	11.5	1	1.20343	13.2145	91.6532	1.71034	0.386956	0.506912
3	9.97	175	989.2	994.5	991.85	4.8	3.4	30.2	0.75	22	70.8	11.5	1	1.20343	13.2145	91.6532	2.31787	0.386956	1.11443
4	9.97	175	989.2	994.5	991.85	4.8	3.4	30.2	0.75	22	70.8	11.5	1	1.20343	13.2145	91.6532	2.14374	0.386956	0.940303
5	9.97	175	989.2	994.5	991.85	4.8	3.4	30.2	0.75	22	70.8	11.5	1	1.20343	13.2145	91.6532	2.13987	0.386956	0.936433
6	9.97	175	989.2	994.5	991.85	4.8	3.4	30.2	0.75	22	70.8	11.5	1	1.20343	13.2145	91.6532	1.70648	0.386956	0.503043
2	9.97	175	1004.6	1007.7	1006.15	2	0.9	29.7	0.51	25	114.8	19	1	0.216618	2.37862	91.6532	0.307862	0.069652	0.0912442
3	9.97	175	1004.6	1007.7	1006.15	2	0.9	29.7	0.51	25	114.8	19	1	0.216618	2.37862	91.6532	0.417216	0.069652	0.200598
4	9.97	175	1004.6	1007.7	1006.15	2	0.9	29.7	0.51	25	114.8	19	1	0.216618	2.37862	91.6532	0.385872	0.069652	0.169254
5	9.97	175	1004.6	1007.7	1006.15	2	0.9	29.7	0.51	25	114.8	19	1	0.216618	2.37862	91.6532	0.385176	0.069652	0.168558
6	9.97	175	1004.6	1007.7	1006.15	2	0.9	29.7	0.51	25	114.8	19	1	0.216618	2.37862	91.6532	0.307166	0.069652	0.0905477
1	9.65	175	963	966.5	964.75	2.2	0.9	29.9	0.515	23	91	15	1	0.0773352	1.72183	95.7016	0.152114	0.0639134	0.0747787
2	9.65	175	963	966.5	964.75	2.2	0.9	29.9	0.515	23	91	15	1	0.0773352	1.72183	95.7016	0.138053	0.0639134	0.0607177
3	9.65	175	963	966.5	964.75	2.2	0.9	29.9	0.515	23	91	15	1	0.0773352	1.72183	95.7016	0.19174	0.0639134	0.114405
4	9.65	175	963	966.5	964.75	2.2	0.9	29.9	0.515	23	91	15	1	0.0773352	1.72183	95.7016	0.163618	0.0639134	0.0862831
5	9.65	175	963	966.5	964.75	2.2	0.9	29.9	0.515	23	91	15	1	0.0773352	1.72183	95.7016	0.188545	0.0639134	0.111209
6	9.65	175	963	966.5	964.75	2.2	0.9	29.9	0.515	23	91	15	1	0.0773352	1.72183	95.7016	0.149557	0.0639134	0.0722221
1	9.65	175	969.7	977.6	973.65	7.9	5.2	29.6	0.717	24	96.56	15	1	0.622085	13.8504	95.7016	1.22361	0.51412	0.601521
2	9.65	175	969.7	977.6	973.65	7.9	5.2	29.6	0.717	24	96.56	15	1	0.622085	13.8504	95.7016	1.1105	0.51412	0.488414
3	9.65	175	969.7	977.6	973.65	7.9	5.2	29.6	0.717	24	96.56	15	1	0.622085	13.8504	95.7016	1.54236	0.51412	0.920275
4	9.65	175	969.7	977.6	973.65	7.9	5.2	29.6	0.717	24	96.56	15	1	0.622085	13.8504	95.7016	1.31615	0.51412	0.694062
5	9.65	175	969.7	977.6	973.65	7.9	5.2	29.6	0.717	24	96.56	15	1	0.622085	13.8504	95.7016	1.51665	0.51412	0.894569
6	9.65	175	969.7	977.6	973.65	7.9	5.2	29.6	0.717	24	96.56	15	1	0.622085	13.8504	95.7016	1.20304	0.51412	0.580956
1	9.65	175	979.3	982.5	980.9	2.5	1.7	28.7	0.614	21	91	15	1	0.174159	3.87755	95.7016	0.34256	0.143933	0.168401
2	9.65	175	979.3	982.5	980.9	2.5	1.7	28.7	0.614	21	91	15	1	0.174159	3.87755	95.7016	0.310895	0.143933	0.136736
3	9.65	175	979.3	982.5	980.9	2.5	1.7	28.7	0.614	21	91	15	1	0.174159	3.87755	95.7016	0.431798	0.143933	0.25764
4	9.65	175	979.3	982.5	980.9	2.5	1.7	28.7	0.614	21	91	15	1	0.174159	3.87755	95.7016	0.368468	0.143933	0.194309
5	9.65	175	979.3	982.5	980.9	2.5	1.7	28.7	0.614	21	91	15	1	0.174159	3.87755	95.7016	0.424601	0.143933	0.250443
6	9.65	175	979.3	982.5	980.9	2.5	1.7	28.7	0.614	21	91	15	1	0.174159	3.87755	95.7016	0.336803	0.143933	0.162644
1	10.05	125	954.3	956.3	955.3	1.2	0.9	31.6	0.448	19	70.84	11.5	1	0.358906	24.07	98.5308	0.884134	0.291793	0.525228
2	10.05	125	954.3	956.3	955.3	1.2	0.9	31.6	0.448	19	70.84	11.5	1	0.358906	24.07	98.5308	1.02711	0.291793	0.668207
3	10.05	125	954.3	956.3	955.3	1.2	0.9	31.6	0.448	19	70.84	11.5	1	0.358906	24.07	98.5308	1.58736	0.291793	1.22845
4	10.05	125	954.3	956.3	955.3	1.2	0.9	31.6	0.448	19	70.84	11.5	1	0.358906	24.07	98.5308	1.71283	0.291793	1.35392
5	10.05	125	954.3	956.3	955.3	1.2	0.9	31.6	0.448	19	70.84	11.5	1	0.358906	24.07	98.5308	1.09422	0.291793	0.735319
6	10.05	125	954.3	956.3	955.3	1.2	0.9	31.6	0.448	19	70.84	11.5	1	0.358906	24.07	98.5308	1.10006	0.291793	0.741155
1	10.05	125	958	958.8	958.4	0.4	0.4	29.9	0.186	26	91.28	15	1	0.0662267	4.44149	98.5308	0.163144	0.0538428	0.0969171
2	10.05	125	958	958.8	958.4	0.4	0.4	29.9	0.186	26	91.28	15	1	0.0662267	4.44149	98.5308	0.189527	0.0538428	0.1233
3	10.05	125	958	958.8	958.4	0.4	0.4	29.9	0.186	26	91.28	15	1	0.0662267	4.44149	98.5308	0.292905	0.0538428	0.226678
4	10.05	125	958	958.8	958.4	0.4	0.4	29.9	0.186	26	91.28	15	1	0.0662267	4.44149	98.5308	0.316057	0.0538428	0.249831
5	10.05	125	958	958.8	958.4	0.4	0.4	29.9	0.186	26	91.28	15	1	0.0662267	4.44149	98.5308	0.201911	0.0538428	0.135684
6	10.05	125	958	958.8	958.4	0.4	0.4	29.9	0.186	26	91.28	15	1	0.0662267	4.44149	98.5308	0.202987	0.0538428	0.136761
1	8.94	175	972.5	974.7	973.6	1.1	0.2	29.2	0.154	29	330	50	1	0.00657592	0.411214	98.426	0.0187713	0.0039854	0.0121953
2	8.94	175	972.5	974.7	973.6	1.1	0.2	29.2	0.154	29	330	50	1	0.00657592	0.411214	98.426	0.0238726	0.0039854	0.0172967
3	8.94	175	972.5	974.7	973.6	1.1	0.2	29.2	0.154	29	330	50	1	0.00657592	0.411214	98.426	0.0189705	0.0039854	0.0123946
4	8.94	175	972.5	974.7	973.6	1.1	0.2	29.2	0.154	29	330	50	1	0.00657592	0.411214	98.426	0.0093657	0.0039854	0.00278978
5	8.94	175	972.5	974.7	973.6	1.1	0.2	29.2	0.154	29	330	50	1	0.00657592	0.411214	98.426	0.00745271	0.0039854	0.000876789
6	8.94	175	972.5	974.7	973.6	1.1	0.2	29.2	0.154	29	330	50	1	0.00657592	0.411214	98.426	0.00713387	0.0039854	0.000557957
1	8.94	175	989.6	993.5	991.55	3.4	0.3	28.9	0.124	26	350	50	1	0.00794234	0.496661	98.426	0.0226718	0.00481354	0.0147294
2	8.94	175	989.6	993.5	991.55	3.4	0.3	28.9	0.124	26	350	50	1	0.00794234	0.496661	98.426	0.0288331	0.00481354	0.0208908
3	8.94	175	989.6	993.5	991.55	3.4	0.3	28.9	0.124	26	350	50	1	0.00794234	0.496661	98.426	0.0229125	0.00481354	0.0149701
4	8.94	175	989.6	993.5	991.55	3.4	0.3	28.9	0.124	26	350	50	1	0.00794234	0.496661	98.426	0.0113118	0.00481354	0.00336948
5	8.94	175	989.6	993.5	991.55	3.4	0.3	28.9	0.124	26	350	50	1	0.00794234	0.496661	98.426	0.00900132	0.00481354	0.00105898
6	8.94	175	989.6	993.5	991.55	3.4	0.3	28.9	0.124	26	350	50	1	0.00794234	0.496661	98.426	0.00861624	0.00481354	0.000673896
5	8.1	150	919.6	922	920.8	1.5	0.6	28.4	0.164	21	114.52	19	1	0.138316	2.02056	93.5932	0.173471	0.0576315	0.0351552
6	8.1	150	919.6	922	920.8	1.5	0.6	28.4	0.164	21	114.52	19	1	0.138316	2.02056	93.5932	0.30026	0.0576315	0.161944
5	8.1	150	928.3	930.9	929.6	2.1	0.3	28.3	0.107	18	114.52	19	1	0.0451212	0.659146	93.5932	0.0565896	0.0188005	0.0114683
6	8.1	150	928.3	930.9	929.6	2.1	0.3	28.3	0.107	18	114.52	19	1	0.0451212	0.659146	93.5932	0.0979507	0.0188005	0.0528294
5	8.1	150	935.7	937	936.35	1.3	0.6	30.6	0.487	18	114.24	19	1	0.41073	6.00008	93.5932	0.515124	0.171137	0.104394
6	8.1	150	935.7	937	936.35	1.3	0.6	30.6	0.487	18	114.24	19	1	0.41073	6.00008	93.5932	0.891626	0.171137	0.480896
5	8.1	150	943.2	948.5	945.85	4.6	2.9	29.1	0.443	17	91	15	1	1.80583	26.3802	93.5932	2.26482	0.752431	0.458983
6	8.1	150	943.2	948.5	945.85	4.6	2.9	29.1	0.443	17	91	15	1	1.80583	26.3802	93.5932	3.92016	0.752431	2.11433
1	8.01	150	1056	1059.3	1057.65	3.3	2.4	30.7	0.501	24	115.08	19	1	1.67886	7.8067	82.3009	1.93069	0.419715	0.251829
2	8.01	150	1056	1059.3	1057.65	3.3	2.4	30.7	0.501	24	115.08	19	1	1.67886	7.8067	82.3009	2.11956	0.419715	0.440701
4	8.01	150	1056	1059.3	1057.65	3.3	2.4	30.7	0.501	24	115.08	19	1	1.67886	7.8067	82.3009	3.06812	0.419715	1.38926
5	8.01	150	1056	1059.3	1057.65	3.3	2.4	30.7	0.501	24	115.08	19	1	1.67886	7.8067	82.3009	3.62214	0.419715	1.94328
6	8.01	150	1056	1059.3	1057.65	3.3	2.4	30.7	0.501	24	115.08	19	1	1.67886	7.8067	82.3009	2.82888	0.419715	1.15002
1	8.01	150	1066.7	1070.4	1068.55	3.7	3.3	28.4	0.423	26	115.08	19	1	1.94904	9.06302	82.3009	2.24139	0.487259	0.292355
2	8.01	150	1066.7	1070.4	1068.55	3.7	3.3	28.4	0.423	26	115.08	19	1	1.94904	9.06302	82.3009	2.46066	0.487259	0.511622
4	8.01	150	1066.7	1070.4	1068.55	3.7	3.3	28.4	0.423	26	115.08	19	1	1.94904	9.06302	82.3009	3.56186	0.487259	1.61283
5	8.01	150	1066.7	1070.4	1068.55	3.7	3.3	28.4	0.423	26	115.08	19	1	1.94904	9.06302	82.3009	4.20505	0.487259	2.25601
6	8.01	150	1066.7	1070.4	1068.55	3.7	3.3	28.4	0.423	26	115.08	19	1	1.94904	9.06302	82.3009	3.28413	0.487259	1.33509
1	8.01	150	1072	1074.4	1073.2	2.4	1.3	29.5	0.205	27	115.08	19	1	0.372103	1.73028	82.3009	0.427918	0.0930257	0.0558154
2	8.01	150	1072	1074.4	1073.2	2.4	1.3	29.5	0.205	27	115.08	19	1	0.372103	1.73028	82.3009	0.46978	0.0930257	0.097677
4	8.01	150	1072	1074.4	1073.2	2.4	1.3	29.5	0.205	27	115.08	19	1	0.372103	1.73028	82.3009	0.680018	0.0930257	0.307915
5	8.01	150	1072	1074.4	1073.2	2.4	1.3	29.5	0.205	27	115.08	19	1	0.372103	1.73028	82.3009	0.802812	0.0930257	0.430709
6	8.01	150	1072	1074.4	1073.2	2.4	1.3	29.5	0.205	27	115.08	19	1	0.372103	1.73028	82.3009	0.626993	0.0930257	0.25489
1	11.09	150	1074.7	1077	1075.85	1.5	1.5	28.4	0.47	20	91.84	15	1	0.291238	8.15467	96.5517	1.39862	0.338649	1.10738
2	11.09	150	1074.7	1077	1075.85	1.5	1.5	28.4	0.47	20	91.84	15	1	0.291238	8.15467	96.5517	1.21914	0.338649	0.927899
3	11.09	150	1074.7	1077	1075.85	1.5	1.5	28.4	0.47	20	91.84	15	1	0.291238	8.15467	96.5517	0.751801	0.338649	0.460563
6	11.09	150	1074.7	1077	1075.85	1.5	1.5	28.4	0.47	20	91.84	15	1	0.291238	8.15467	96.5517	0.612955	0.338649	0.321717
1	11.09	150	1080.7	1081.5	1081.1	0.8	0.8	29.3	0.419	24	114.52	19	1	0.138472	3.87723	96.5517	0.66499	0.161015	0.526517
2	11.09	150	1080.7	1081.5	1081.1	0.8	0.8	29.3	0.419	24	114.52	19	1	0.138472	3.87723	96.5517	0.579652	0.161015	0.44118
3	11.09	150	1080.7	1081.5	1081.1	0.8	0.8	29.3	0.419	24	114.52	19	1	0.138472	3.87723	96.5517	0.357452	0.161015	0.21898
6	11.09	150	1080.7	1081.5	1081.1	0.8	0.8	29.3	0.419	24	114.52	19	1	0.138472	3.87723	96.5517	0.291436	0.161015	0.152964
1	10.62	150	1135.9	1139.3	1137.6	2.2	1.5	27.6	0.334	25	90.44	15	1	0.0734168	4.77035	98.4843	0.804089	0.174802	0.730672
2	10.62	150	1135.9	1139.3	1137.6	2.2	1.5	27.6	0.334	25	90.44	15	1	0.0734168	4.77035	98.4843	0.51217	0.174802	0.438753
3	10.62	150	1135.9	1139.3	1137.6	2.2	1.5	27.6	0.334	25	90.44	15	1	0.0734168	4.77035	98.4843	0.48595	0.174802	0.412533
4	10.62	150	1135.9	1139.3	1137.6	2.2	1.5	27.6	0.334	25	90.44	15	1	0.0734168	4.77035	98.4843	0.543634	0.174802	0.470217
5	10.62	150	1135.9	1139.3	1137.6	2.2	1.5	27.6	0.334	25	90.44	15	1	0.0734168	4.77035	98.4843	0.38806	0.174802	0.314644
6	10.62	150	1135.9	1139.3	1137.6	2.2	1.5	27.6	0.334	25	90.44	15	1	0.0734168	4.77035	98.4843	0.527902	0.174802	0.454485
1	10.62	150	1156.1	1156.5	1156.3	0.4	0.2	25.7	0.148	35	82.88	13.5	1	0.0043376	0.281841	98.4843	0.0475071	0.0103276	0.0431695
2	10.62	150	1156.1	1156.5	1156.3	0.4	0.2	25.7	0.148	35	82.88	13.5	1	0.0043376	0.281841	98.4843	0.0302599	0.0103276	0.0259223
3	10.62	150	1156.1	1156.5	1156.3	0.4	0.2	25.7	0.148	35	82.88	13.5	1	0.0043376	0.281841	98.4843	0.0287108	0.0103276	0.0243732
4	10.62	150	1156.1	1156.5	1156.3	0.4	0.2	25.7	0.148	35	82.88	13.5	1	0.0043376	0.281841	98.4843	0.0321189	0.0103276	0.0277813
5	10.62	150	1156.1	1156.5	1156.3	0.4	0.2	25.7	0.148	35	82.88	13.5	1	0.0043376	0.281841	98.4843	0.0229273	0.0103276	0.0185897
6	10.62	150	1156.1	1156.5	1156.3	0.4	0.2	25.7	0.148	35	82.88	13.5	1	0.0043376	0.281841	98.4843	0.0311894	0.0103276	0.0268518
3	8.94	175	986.7	989	987.85	2.3	1.8	29.6	0.416	43	426.9	50	1	1.25777	39.7101	96.9299	1.67021	0.340859	0.41244
4	8.94	175	986.7	989	987.85	2.3	1.8	29.6	0.416	43	426.9	50	1	1.25777	39.7101	96.9299	1.40434	0.340859	0.14657
5	8.94	175	986.7	989	987.85	2.3	1.8	29.6	0.416	43	426.9	50	1	1.25777	39.7101	96.9299	1.39752	0.340859	0.139752
3	8.94	175	998.5	999.5	999	1	0.2	29.6	0.103	35	405.75	50	1	0.0346021	1.09245	96.9299	0.0459487	0.00937728	0.0113465
4	8.94	175	998.5	999.5	999	1	0.2	29.6	0.103	35	405.75	50	1	0.0346021	1.09245	96.9299	0.0386344	0.00937728	0.00403223
5	8.94	175	998.5	999.5	999	1	0.2	29.6	0.103	35	405.75	50	1	0.0346021	1.09245	96.9299	0.0384468	0.00937728	0.00384468
1	9.77	150	1067.4	1068.7	1068.05	1.3	0.6	27	0.165	28	91.56	15	1	0.00665412	0.507044	98.7047	0.0485751	0.0665412	0.041921
2	9.77	150	1067.4	1068.7	1068.05	1.3	0.6	27	0.165	28	91.56	15	1	0.00665412	0.507044	98.7047	0.0379285	0.0665412	0.0312744
3	9.77	150	1067.4	1068.7	1068.05	1.3	0.6	27	0.165	28	91.56	15	1	0.00665412	0.507044	98.7047	0.0405901	0.0665412	0.033936
4	9.77	150	1067.4	1068.7	1068.05	1.3	0.6	27	0.165	28	91.56	15	1	0.00665412	0.507044	98.7047	0.0585563	0.0665412	0.0519021
5	9.77	150	1067.4	1068.7	1068.05	1.3	0.6	27	0.165	28	91.56	15	1	0.00665412	0.507044	98.7047	0.0665412	0.0665412	0.0598871
6	9.77	150	1067.4	1068.7	1068.05	1.3	0.6	27	0.165	28	91.56	15	1	0.00665412	0.507044	98.7047	0.0499059	0.0665412	0.0432518
1	9.13	150	989.2	993.2	991.2	4	1.7	31.1	0.676	25	169.96	28.5	1	0.531811	6.98078	92.9211	0.849674	0.611277	0.317864
2	9.13	150	989.2	993.2	991.2	4	1.7	31.1	0.676	25	169.96	28.5	1	0.531811	6.98078	92.9211	0.623502	0.611277	0.0916915
1	10.62	150	1088.3	1092.1	1090.2	3.8	2.9	27.2	0.451	25	91.28	15	1	0.897177	15.9513	94.675	3.21928	0.659689	2.32211
2	10.62	150	1088.3	1092.1	1090.2	3.8	2.9	27.2	0.451	25	91.28	15	1	0.897177	15.9513	94.675	1.97247	0.659689	1.07529
3	10.62	150	1088.3	1092.1	1090.2	3.8	2.9	27.2	0.451	25	91.28	15	1	0.897177	15.9513	94.675	1.92629	0.659689	1.02912
4	10.62	150	1088.3	1092.1	1090.2	3.8	2.9	27.2	0.451	25	91.28	15	1	0.897177	15.9513	94.675	1.39854	0.659689	0.501364
5	10.62	150	1088.3	1092.1	1090.2	3.8	2.9	27.2	0.451	25	91.28	15	1	0.897177	15.9513	94.675	1.11487	0.659689	0.217697
6	10.62	150	1088.3	1092.1	1090.2	3.8	2.9	27.2	0.451	25	91.28	15	1	0.897177	15.9513	94.675	1.13467	0.659689	0.237488
1	10.62	150	1111.3	1112.6	1111.95	1.3	1.3	28.2	0.519	27	169.68	28.5	1	0.462823	8.22871	94.675	1.66072	0.340311	1.19789
2	10.62	150	1111.3	1112.6	1111.95	1.3	1.3	28.2	0.519	27	169.68	28.5	1	0.462823	8.22871	94.675	1.01753	0.340311	0.554706
3	10.62	150	1111.3	1112.6	1111.95	1.3	1.3	28.2	0.519	27	169.68	28.5	1	0.462823	8.22871	94.675	0.993707	0.340311	0.530885
4	10.62	150	1111.3	1112.6	1111.95	1.3	1.3	28.2	0.519	27	169.68	28.5	1	0.462823	8.22871	94.675	0.721459	0.340311	0.258636
5	10.62	150	1111.3	1112.6	1111.95	1.3	1.3	28.2	0.519	27	169.68	28.5	1	0.462823	8.22871	94.675	0.575125	0.340311	0.112303
6	10.62	150	1111.3	1112.6	1111.95	1.3	1.3	28.2	0.519	27	169.68	28.5	1	0.462823	8.22871	94.675	0.585334	0.340311	0.122512
1	8.87	150	1096.6	1098.5	1097.55	1.9	0.6	27	0.191	27	115.08	19	1	0.00861465	1.0194	99.162	0.0211777	0.0358944	0.012563
2	8.87	150	1096.6	1098.5	1097.55	1.9	0.6	27	0.191	27	115.08	19	1	0.00861465	1.0194	99.162	0.0294334	0.0358944	0.0208187
3	8.87	150	1096.6	1098.5	1097.55	1.9	0.6	27	0.191	27	115.08	19	1	0.00861465	1.0194	99.162	0.0337407	0.0358944	0.0251261
4	8.87	150	1096.6	1098.5	1097.55	1.9	0.6	27	0.191	27	115.08	19	1	0.00861465	1.0194	99.162	0.044509	0.0358944	0.0358944
5	8.87	150	1096.6	1098.5	1097.55	1.9	0.6	27	0.191	27	115.08	19	1	0.00861465	1.0194	99.162	0.0208187	0.0358944	0.0122041
6	8.87	150	1096.6	1098.5	1097.55	1.9	0.6	27	0.191	27	115.08	19	1	0.00861465	1.0194	99.162	0.0222545	0.0358944	0.0136399
1	8.87	150	1101.3	1105.3	1103.3	1.7	1.6	28.4	0.407	27	115.08	19	1	0.0489517	5.79261	99.162	0.12034	0.203965	0.0713879
2	8.87	150	1101.3	1105.3	1103.3	1.7	1.6	28.4	0.407	27	115.08	19	1	0.0489517	5.79261	99.162	0.167252	0.203965	0.1183
3	8.87	150	1101.3	1105.3	1103.3	1.7	1.6	28.4	0.407	27	115.08	19	1	0.0489517	5.79261	99.162	0.191727	0.203965	0.142776
4	8.87	150	1101.3	1105.3	1103.3	1.7	1.6	28.4	0.407	27	115.08	19	1	0.0489517	5.79261	99.162	0.252917	0.203965	0.203965
5	8.87	150	1101.3	1105.3	1103.3	1.7	1.6	28.4	0.407	27	115.08	19	1	0.0489517	5.79261	99.162	0.1183	0.203965	0.0693482
6	8.87	150	1101.3	1105.3	1103.3	1.7	1.6	28.4	0.407	27	115.08	19	1	0.0489517	5.79261	99.162	0.126458	0.203965	0.0775068
1	8.87	150	1118.5	1118.9	1118.7	0.4	0.4	27.6	0.251	33	71.12	11.5	1	0.00754722	0.893087	99.162	0.0185536	0.0314467	0.0110064
2	8.87	150	1118.5	1118.9	1118.7	0.4	0.4	27.6	0.251	33	71.12	11.5	1	0.00754722	0.893087	99.162	0.0257863	0.0314467	0.0182391
3	8.87	150	1118.5	1118.9	1118.7	0.4	0.4	27.6	0.251	33	71.12	11.5	1	0.00754722	0.893087	99.162	0.0295599	0.0314467	0.0220127
4	8.87	150	1118.5	1118.9	1118.7	0.4	0.4	27.6	0.251	33	71.12	11.5	1	0.00754722	0.893087	99.162	0.038994	0.0314467	0.0314467
5	8.87	150	1118.5	1118.9	1118.7	0.4	0.4	27.6	0.251	33	71.12	11.5	1	0.00754722	0.893087	99.162	0.0182391	0.0314467	0.0106919
6	8.87	150	1118.5	1118.9	1118.7	0.4	0.4	27.6	0.251	33	71.12	11.5	1	0.00754722	0.893087	99.162	0.019497	0.0314467	0.0119498
1	7.73	175	993.1	998.3	995.7	4.5	3.4	32	0.993	30	365	51.5	1	0.806472	52.7896	98.4953	4.60718	0.857949	3.80071
2	7.73	175	993.1	998.3	995.7	4.5	3.4	32	0.993	30	365	51.5	1	0.806472	52.7896	98.4953	3.91225	0.857949	3.10577
3	7.73	175	993.1	998.3	995.7	4.5	3.4	32	0.993	30	365	51.5	1	0.806472	52.7896	98.4953	4.62434	0.857949	3.81787
4	7.73	175	993.1	998.3	995.7	4.5	3.4	32	0.993	30	365	51.5	1	0.806472	52.7896	98.4953	4.28116	0.857949	3.47469
5	7.73	175	993.1	998.3	995.7	4.5	3.4	32	0.993	30	365	51.5	1	0.806472	52.7896	98.4953	5.29354	0.857949	4.48707
6	7.73	175	993.1	998.3	995.7	4.5	3.4	32	0.993	30	365	51.5	1	0.806472	52.7896	98.4953	5.6453	0.857949	4.83883
4	9.28	150	1010.2	1013.7	1011.95	2.7	1.3	29.6	0.344	21	91.56	15	1	0.21717	4.3246	95.2184	0.393301	0.171	0.17613
5	9.28	150	1010.2	1013.7	1011.95	2.7	1.3	29.6	0.344	21	91.56	15	1	0.21717	4.3246	95.2184	0.340291	0.171	0.12312
6	9.28	150	1010.2	1013.7	1011.95	2.7	1.3	29.6	0.344	21	91.56	15	1	0.21717	4.3246	95.2184	0.381331	0.171	0.16416
4	9.28	150	1014.8	1019.5	1017.15	3.5	2.4	30.9	0.572	20	89.56	11.5	1	0.666663	13.2755	95.2184	1.20734	0.524931	0.540679
5	9.28	150	1014.8	1019.5	1017.15	3.5	2.4	30.9	0.572	20	89.56	11.5	1	0.666663	13.2755	95.2184	1.04461	0.524931	0.37795
6	9.28	150	1014.8	1019.5	1017.15	3.5	2.4	30.9	0.572	20	89.56	11.5	1	0.666663	13.2755	95.2184	1.1706	0.524931	0.503934
5	10.66	125	947	949.8	948.4	2.8	1	31.8	0.528	21	83.16	13.5	1	0.233076	4.26541	94.8188	0.3239	0.109426	0.0908232
6	10.66	125	947	949.8	948.4	2.8	1	31.8	0.528	21	83.16	13.5	1	0.233076	4.26541	94.8188	0.40378	0.109426	0.170704
5	10.66	125	967.6	969.2	968.4	1.6	0.5	30	0.376	20	91.56	15	1	0.0829893	1.51874	94.8188	0.115328	0.0389621	0.0323386
6	10.66	125	967.6	969.2	968.4	1.6	0.5	30	0.376	20	91.56	15	1	0.0829893	1.51874	94.8188	0.14377	0.0389621	0.0607809
1	9.3	150	977.3	978.3	977.8	1	0.5	29.2	0.123	26	99.68	16.5	1	0.0546956	0.868791	94.0773	0.0646568	0.0181111	0.00996113
2	9.3	150	977.3	978.3	977.8	1	0.5	29.2	0.123	26	99.68	16.5	1	0.0546956	0.868791	94.0773	0.0820435	0.0181111	0.0273478
3	9.3	150	977.3	978.3	977.8	1	0.5	29.2	0.123	26	99.68	16.5	1	0.0546956	0.868791	94.0773	0.0762479	0.0181111	0.0215523
5	9.3	150	977.3	978.3	977.8	1	0.5	29.2	0.123	26	99.68	16.5	1	0.0546956	0.868791	94.0773	0.0670112	0.0181111	0.0123156
6	9.3	150	977.3	978.3	977.8	1	0.5	29.2	0.123	26	99.68	16.5	1	0.0546956	0.868791	94.0773	0.0767912	0.0181111	0.0220956
1	9.3	150	990.7	993.4	992.05	2.7	1.5	31.6	0.434	24	99.68	16.5	1	0.578973	9.19647	94.0773	0.684416	0.191713	0.105442
2	9.3	150	990.7	993.4	992.05	2.7	1.5	31.6	0.434	24	99.68	16.5	1	0.578973	9.19647	94.0773	0.86846	0.191713	0.289487
3	9.3	150	990.7	993.4	992.05	2.7	1.5	31.6	0.434	24	99.68	16.5	1	0.578973	9.19647	94.0773	0.807112	0.191713	0.228139
5	9.3	150	990.7	993.4	992.05	2.7	1.5	31.6	0.434	24	99.68	16.5	1	0.578973	9.19647	94.0773	0.709338	0.191713	0.130365
6	9.3	150	990.7	993.4	992.05	2.7	1.5	31.6	0.434	24	99.68	16.5	1	0.578973	9.19647	94.0773	0.812863	0.191713	0.23389
1	9.78	150	1115.9	1116.9	1116.4	1	0.7	27.4	0.251	29	70.84	11.5	1	0.100762	2.10638	95.4347	0.455695	0.056608	0.354932
2	9.78	150	1115.9	1116.9	1116.4	1	0.7	27.4	0.251	29	70.84	11.5	1	0.100762	2.10638	95.4347	0.508906	0.056608	0.408144
3	9.78	150	1115.9	1116.9	1116.4	1	0.7	27.4	0.251	29	70.84	11.5	1	0.100762	2.10638	95.4347	0.508906	0.056608	0.408144
4	9.78	150	1115.9	1116.9	1116.4	1	0.7	27.4	0.251	29	70.84	11.5	1	0.100762	2.10638	95.4347	0.328893	0.056608	0.22813
5	9.78	150	1115.9	1116.9	1116.4	1	0.7	27.4	0.251	29	70.84	11.5	1	0.100762	2.10638	95.4347	0.319269	0.056608	0.218507
6	9.78	150	1115.9	1116.9	1116.4	1	0.7	27.4	0.251	29	70.84	11.5	1	0.100762	2.10638	95.4347	0.312476	0.056608	0.211714
1	9.78	150	1135.8	1138	1136.9	2.2	1.4	27.4	0.285	30	53.76	8.5	1	0.228823	4.78342	95.4347	1.03484	0.128552	0.806022
2	9.78	150	1135.8	1138	1136.9	2.2	1.4	27.4	0.285	30	53.76	8.5	1	0.228823	4.78342	95.4347	1.15568	0.128552	0.926861
3	9.78	150	1135.8	1138	1136.9	2.2	1.4	27.4	0.285	30	53.76	8.5	1	0.228823	4.78342	95.4347	1.15568	0.128552	0.926861
4	9.78	150	1135.8	1138	1136.9	2.2	1.4	27.4	0.285	30	53.76	8.5	1	0.228823	4.78342	95.4347	0.746888	0.128552	0.518065
5	9.78	150	1135.8	1138	1136.9	2.2	1.4	27.4	0.285	30	53.76	8.5	1	0.228823	4.78342	95.4347	0.725034	0.128552	0.496211
6	9.78	150	1135.8	1138	1136.9	2.2	1.4	27.4	0.285	30	53.76	8.5	1	0.228823	4.78342	95.4347	0.709608	0.128552	0.480785
1	9.78	150	1140.4	1145.1	1142.75	3.4	2.1	28.3	0.407	26	71.12	11.5	1	0.490162	10.2466	95.4347	2.21675	0.275372	1.72658
2	9.78	150	1140.4	1145.1	1142.75	3.4	2.1	28.3	0.407	26	71.12	11.5	1	0.490162	10.2466	95.4347	2.4756	0.275372	1.98543
3	9.78	150	1140.4	1145.1	1142.75	3.4	2.1	28.3	0.407	26	71.12	11.5	1	0.490162	10.2466	95.4347	2.4756	0.275372	1.98543
4	9.78	150	1140.4	1145.1	1142.75	3.4	2.1	28.3	0.407	26	71.12	11.5	1	0.490162	10.2466	95.4347	1.59991	0.275372	1.10975
5	9.78	150	1140.4	1145.1	1142.75	3.4	2.1	28.3	0.407	26	71.12	11.5	1	0.490162	10.2466	95.4347	1.5531	0.275372	1.06294
6	9.78	150	1140.4	1145.1	1142.75	3.4	2.1	28.3	0.407	26	71.12	11.5	1	0.490162	10.2466	95.4347	1.52005	0.275372	1.02989
1	8.94	175	962.8	964.3	963.55	1.5	0.5	30.8	0.358	26	360	51.5	1	0.0417828	0.947076	95.7746	0.244386	0.0217619	0.202603
2	8.94	175	962.8	964.3	963.55	1.5	0.5	30.8	0.358	26	360	51.5	1	0.0417828	0.947076	95.7746	0.209784	0.0217619	0.168002
3	8.94	175	962.8	964.3	963.55	1.5	0.5	30.8	0.358	26	360	51.5	1	0.0417828	0.947076	95.7746	0.226323	0.0217619	0.184541
4	8.94	175	962.8	964.3	963.55	1.5	0.5	30.8	0.358	26	360	51.5	1	0.0417828	0.947076	95.7746	0.166478	0.0217619	0.124695
5	8.94	175	962.8	964.3	963.55	1.5	0.5	30.8	0.358	26	360	51.5	1	0.0417828	0.947076	95.7746	0.172136	0.0217619	0.130354
6	8.94	175	962.8	964.3	963.55	1.5	0.5	30.8	0.358	26	360	51.5	1	0.0417828	0.947076	95.7746	0.186499	0.0217619	0.144716
1	8.94	175	973.6	976.9	975.25	3.3	3.1	32.4	1.216	25	360	51.5	1	0.879912	19.9447	95.7746	5.14657	0.458288	4.26666
2	8.94	175	973.6	976.9	975.25	3.3	3.1	32.4	1.216	25	360	51.5	1	0.879912	19.9447	95.7746	4.41789	0.458288	3.53798
3	8.94	175	973.6	976.9	975.25	3.3	3.1	32.4	1.216	25	360	51.5	1	0.879912	19.9447	95.7746	4.76619	0.458288	3.88628
4	8.94	175	973.6	976.9	975.25	3.3	3.1	32.4	1.216	25	360	51.5	1	0.879912	19.9447	95.7746	3.5059	0.458288	2.62599
5	8.94	175	973.6	976.9	975.25	3.3	3.1	32.4	1.216	25	360	51.5	1	0.879912	19.9447	95.7746	3.62506	0.458288	2.74514
6	8.94	175	973.6	976.9	975.25	3.3	3.1	32.4	1.216	25	360	51.5	1	0.879912	19.9447	95.7746	3.92753	0.458288	3.04761
1	8.94	175	978.3	981.1	979.7	2.8	0.6	29.4	0.486	33	360	51.5	1	0.0680662	1.54283	95.7746	0.398117	0.0354512	0.33005
2	8.94	175	978.3	981.1	979.7	2.8	0.6	29.4	0.486	33	360	51.5	1	0.0680662	1.54283	95.7746	0.341749	0.0354512	0.273683
3	8.94	175	978.3	981.1	979.7	2.8	0.6	29.4	0.486	33	360	51.5	1	0.0680662	1.54283	95.7746	0.368692	0.0354512	0.300626
4	8.94	175	978.3	981.1	979.7	2.8	0.6	29.4	0.486	33	360	51.5	1	0.0680662	1.54283	95.7746	0.271201	0.0354512	0.203135
5	8.94	175	978.3	981.1	979.7	2.8	0.6	29.4	0.486	33	360	51.5	1	0.0680662	1.54283	95.7746	0.280419	0.0354512	0.212352
6	8.94	175	978.3	981.1	979.7	2.8	0.6	29.4	0.486	33	360	51.5	1	0.0680662	1.54283	95.7746	0.303816	0.0354512	0.23575
1	8.21	150	962.7	965.1	963.9	2.4	2.1	30	0.367	22	53.2	8.5	1	0.796675	27.004	97.1343	1.3029	0.82987	0.506221
2	8.21	150	962.7	965.1	963.9	2.4	2.1	30	0.367	22	53.2	8.5	1	0.796675	27.004	97.1343	0.979246	0.82987	0.182571
3	8.21	150	962.7	965.1	963.9	2.4	2.1	30	0.367	22	53.2	8.5	1	0.796675	27.004	97.1343	1.00414	0.82987	0.207467
4	8.21	150	962.7	965.1	963.9	2.4	2.1	30	0.367	22	53.2	8.5	1	0.796675	27.004	97.1343	0.962649	0.82987	0.165974
1	8.21	150	974.9	976.9	975.9	2	0.2	26.3	0.079	29	170.52	28.5	1	0.0163325	0.553604	97.1343	0.0267105	0.017013	0.0103779
2	8.21	150	974.9	976.9	975.9	2	0.2	26.3	0.079	29	170.52	28.5	1	0.0163325	0.553604	97.1343	0.0200754	0.017013	0.00374287
3	8.21	150	974.9	976.9	975.9	2	0.2	26.3	0.079	29	170.52	28.5	1	0.0163325	0.553604	97.1343	0.0205858	0.017013	0.00425326
4	8.21	150	974.9	976.9	975.9	2	0.2	26.3	0.079	29	170.52	28.5	1	0.0163325	0.553604	97.1343	0.0197351	0.017013	0.00340261
3	11.41	175	947.1	949.5	948.3	2	0.4	27.2	0.092	0	105.56	17	1	0.0163193	0.186944	91.9714	0.0185021	0.00519723	0.00218284
4	11.41	175	947.1	949.5	948.3	2	0.4	27.2	0.092	0	105.56	17	1	0.0163193	0.186944	91.9714	0.0173068	0.00519723	0.000987473
3	11.41	175	974.8	978	976.4	3.2	1.1	28.9	0.833	0	105.84	17.5	1	0.406341	4.65481	91.9714	0.460693	0.129408	0.0543514
4	11.41	175	974.8	978	976.4	3.2	1.1	28.9	0.833	0	105.84	17.5	1	0.406341	4.65481	91.9714	0.430929	0.129408	0.0245875
1	10.25	150	1146.9	1148.4	1147.65	1.5	0.7	27.9	0.206	26	115.08	19	1	0.0818414	1.38448	94.4186	0.156863	0.113669	0.0750213
2	10.25	150	1146.9	1148.4	1147.65	1.5	0.7	27.9	0.206	26	115.08	19	1	0.0818414	1.38448	94.4186	0.345553	0.113669	0.263711
3	10.25	150	1146.9	1148.4	1147.65	1.5	0.7	27.9	0.206	26	115.08	19	1	0.0818414	1.38448	94.4186	0.240977	0.113669	0.159136
4	10.25	150	1146.9	1148.4	1147.65	1.5	0.7	27.9	0.206	26	115.08	19	1	0.0818414	1.38448	94.4186	0.107985	0.113669	0.0261438
1	10.25	150	1151.5	1153.4	1152.45	1.9	0.7	27.3	0.226	27	115.08	19	1	0.0897872	1.5189	94.4186	0.172092	0.124704	0.0823049
2	10.25	150	1151.5	1153.4	1152.45	1.9	0.7	27.3	0.226	27	115.08	19	1	0.0897872	1.5189	94.4186	0.379101	0.124704	0.289314
3	10.25	150	1151.5	1153.4	1152.45	1.9	0.7	27.3	0.226	27	115.08	19	1	0.0897872	1.5189	94.4186	0.264373	0.124704	0.174586
4	10.25	150	1151.5	1153.4	1152.45	1.9	0.7	27.3	0.226	27	115.08	19	1	0.0897872	1.5189	94.4186	0.118469	0.124704	0.028682
1	10.25	150	1155	1157.5	1156.25	1.5	0.5	26.5	0.102	27	115.08	19	1	0.0289453	0.489658	94.4186	0.0554785	0.0402018	0.0265332
2	10.25	150	1155	1157.5	1156.25	1.5	0.5	26.5	0.102	27	115.08	19	1	0.0289453	0.489658	94.4186	0.122213	0.0402018	0.0932682
3	10.25	150	1155	1157.5	1156.25	1.5	0.5	26.5	0.102	27	115.08	19	1	0.0289453	0.489658	94.4186	0.0852278	0.0402018	0.0562825
4	10.25	150	1155	1157.5	1156.25	1.5	0.5	26.5	0.102	27	115.08	19	1	0.0289453	0.489658	94.4186	0.0381917	0.0402018	0.00924641
3	9.78	150	1073.8	1074.9	1074.35	1.1	0.6	27.4	0.217	34	91.28	15	1	0.110528	0.749709	87.1514	0.213465	0.0151824	0.102937
4	9.78	150	1073.8	1074.9	1074.35	1.1	0.6	27.4	0.217	34	91.28	15	1	0.110528	0.749709	87.1514	0.192817	0.0151824	0.0822888
5	9.78	150	1073.8	1074.9	1074.35	1.1	0.6	27.4	0.217	34	91.28	15	1	0.110528	0.749709	87.1514	0.176268	0.0151824	0.0657399
6	9.78	150	1073.8	1074.9	1074.35	1.1	0.6	27.4	0.217	34	91.28	15	1	0.110528	0.749709	87.1514	0.126318	0.0151824	0.0157897
3	9.78	150	1078	1079.7	1078.85	1.7	0.9	28	0.334	33	91.28	15	1	0.255182	1.73089	87.1514	0.492839	0.0350525	0.237656
4	9.78	150	1078	1079.7	1078.85	1.7	0.9	28	0.334	33	91.28	15	1	0.255182	1.73089	87.1514	0.445167	0.0350525	0.189985
5	9.78	150	1078	1079.7	1078.85	1.7	0.9	28	0.334	33	91.28	15	1	0.255182	1.73089	87.1514	0.40696	0.0350525	0.151777
6	9.78	150	1078	1079.7	1078.85	1.7	0.9	28	0.334	33	91.28	15	1	0.255182	1.73089	87.1514	0.291637	0.0350525	0.0364546
3	9.78	150	1082.6	1088.6	1085.6	6	5.5	29.2	0.549	28	71.12	11.5	1	2.56328	17.3867	87.1514	4.95052	0.3521	2.38723
4	9.78	150	1082.6	1088.6	1085.6	6	5.5	29.2	0.549	28	71.12	11.5	1	2.56328	17.3867	87.1514	4.47166	0.3521	1.90838
5	9.78	150	1082.6	1088.6	1085.6	6	5.5	29.2	0.549	28	71.12	11.5	1	2.56328	17.3867	87.1514	4.08788	0.3521	1.52459
6	9.78	150	1082.6	1088.6	1085.6	6	5.5	29.2	0.549	28	71.12	11.5	1	2.56328	17.3867	87.1514	2.92947	0.3521	0.366184
1	10.8	150	1021.3	1026.6	1023.95	5.3	3	30.6	0.397	28	91	15	1	0.223902	17.0478	98.7036	0.604013	0.520701	0.380112
2	10.8	150	1021.3	1026.6	1023.95	5.3	3	30.6	0.397	28	91	15	1	0.223902	17.0478	98.7036	0.463424	0.520701	0.239523
3	10.8	150	1021.3	1026.6	1023.95	5.3	3	30.6	0.397	28	91	15	1	0.223902	17.0478	98.7036	0.567564	0.520701	0.343663
4	10.8	150	1021.3	1026.6	1023.95	5.3	3	30.6	0.397	28	91	15	1	0.223902	17.0478	98.7036	0.577978	0.520701	0.354077
5	10.8	150	1021.3	1026.6	1023.95	5.3	3	30.6	0.397	28	91	15	1	0.223902	17.0478	98.7036	0.770638	0.520701	0.546736
6	10.8	150	1021.3	1026.6	1023.95	5.3	3	30.6	0.397	28	91	15	1	0.223902	17.0478	98.7036	1.14034	0.520701	0.916434
1	10.8	150	1043.6	1046.2	1044.9	2.6	1.9	31.6	0.577	32	99.96	16.5	1	0.206098	15.6922	98.7036	0.555987	0.479299	0.349888
2	10.8	150	1043.6	1046.2	1044.9	2.6	1.9	31.6	0.577	32	99.96	16.5	1	0.206098	15.6922	98.7036	0.426576	0.479299	0.220477
3	10.8	150	1043.6	1046.2	1044.9	2.6	1.9	31.6	0.577	32	99.96	16.5	1	0.206098	15.6922	98.7036	0.522436	0.479299	0.316337
4	10.8	150	1043.6	1046.2	1044.9	2.6	1.9	31.6	0.577	32	99.96	16.5	1	0.206098	15.6922	98.7036	0.532022	0.479299	0.325923
5	10.8	150	1043.6	1046.2	1044.9	2.6	1.9	31.6	0.577	32	99.96	16.5	1	0.206098	15.6922	98.7036	0.709362	0.479299	0.503264
6	10.8	150	1043.6	1046.2	1044.9	2.6	1.9	31.6	0.577	32	99.96	16.5	1	0.206098	15.6922	98.7036	1.04966	0.479299	0.843566
2	9.67	125	926.3	931.1	928.7	3.8	1.9	29.4	0.357	34	70.56	11.5	1	2.55579	6.80118	72.6857	4.6464	0.534684	2.09061
3	9.67	125	926.3	931.1	928.7	3.8	1.9	29.4	0.357	34	70.56	11.5	1	2.55579	6.80118	72.6857	4.96187	0.534684	2.40608
4	9.67	125	926.3	931.1	928.7	3.8	1.9	29.4	0.357	34	70.56	11.5	1	2.55579	6.80118	72.6857	5.71577	0.534684	3.15998
5	9.67	125	926.3	931.1	928.7	3.8	1.9	29.4	0.357	34	70.56	11.5	1	2.55579	6.80118	72.6857	6.12213	0.534684	3.56634
6	9.67	125	926.3	931.1	928.7	3.8	1.9	29.4	0.357	34	70.56	11.5	1	2.55579	6.80118	72.6857	4.57689	0.534684	2.02111
1	9.85	125	979.8	983.6	981.7	3.8	1.8	31.4	0.807	24	91.28	15	1	2.49049	36.1674	93.5576	4.99942	0.922403	2.50894
2	9.85	125	979.8	983.6	981.7	3.8	1.8	31.4	0.807	24	91.28	15	1	2.49049	36.1674	93.5576	4.16926	0.922403	1.67877
3	9.85	125	979.8	983.6	981.7	3.8	1.8	31.4	0.807	24	91.28	15	1	2.49049	36.1674	93.5576	5.64511	0.922403	3.15462
4	9.85	125	979.8	983.6	981.7	3.8	1.8	31.4	0.807	24	91.28	15	1	2.49049	36.1674	93.5576	6.53061	0.922403	4.04012
5	9.85	125	979.8	983.6	981.7	3.8	1.8	31.4	0.807	24	91.28	15	1	2.49049	36.1674	93.5576	8.55067	0.922403	6.06019
6	9.85	125	979.8	983.6	981.7	3.8	1.8	31.4	0.807	24	91.28	15	1	2.49049	36.1674	93.5576	8.93808	0.922403	6.4476
1	9.85	125	992.1	993.4	992.75	1.3	0.4	27.7	0.076	27	141.12	23.5	1	0.0521209	0.756911	93.5576	0.104628	0.019304	0.052507
2	9.85	125	992.1	993.4	992.75	1.3	0.4	27.7	0.076	27	141.12	23.5	1	0.0521209	0.756911	93.5576	0.0872543	0.019304	0.0351334
3	9.85	125	992.1	993.4	992.75	1.3	0.4	27.7	0.076	27	141.12	23.5	1	0.0521209	0.756911	93.5576	0.118141	0.019304	0.0660198
4	9.85	125	992.1	993.4	992.75	1.3	0.4	27.7	0.076	27	141.12	23.5	1	0.0521209	0.756911	93.5576	0.136673	0.019304	0.0845517
5	9.85	125	992.1	993.4	992.75	1.3	0.4	27.7	0.076	27	141.12	23.5	1	0.0521209	0.756911	93.5576	0.178948	0.019304	0.126828
6	9.85	125	992.1	993.4	992.75	1.3	0.4	27.7	0.076	27	141.12	23.5	1	0.0521209	0.756911	93.5576	0.187056	0.019304	0.134935
3	9.11	150	922.6	924.2	923.4	1.6	1.5	30.8	0.452	20	53.04	8.5	1	2.64795	37.8943	93.4687	2.83581	0.894577	0.187861
3	9.11	150	932.4	935.8	934.1	2.2	0.4	28.4	0.066	22	140.84	23.5	1	0.103106	1.47553	93.4687	0.110421	0.0348331	0.00731495
1	11.67	150	1054.1	1056.4	1055.25	2.3	0.8	29.6	0.309	0	91.56	15	1	0.230201	3.86147	94.3739	0.644562	0.118052	0.414361
2	11.67	150	1054.1	1056.4	1055.25	2.3	0.8	29.6	0.309	0	91.56	15	1	0.230201	3.86147	94.3739	0.743725	0.118052	0.513524
3	11.67	150	1054.1	1056.4	1055.25	2.3	0.8	29.6	0.309	0	91.56	15	1	0.230201	3.86147	94.3739	0.704768	0.118052	0.474567
4	11.67	150	1054.1	1056.4	1055.25	2.3	0.8	29.6	0.309	0	91.56	15	1	0.230201	3.86147	94.3739	0.705948	0.118052	0.475748
5	11.67	150	1054.1	1056.4	1055.25	2.3	0.8	29.6	0.309	0	91.56	15	1	0.230201	3.86147	94.3739	0.950315	0.118052	0.720115
6	11.67	150	1054.1	1056.4	1055.25	2.3	0.8	29.6	0.309	0	91.56	15	1	0.230201	3.86147	94.3739	0.934968	0.118052	0.704768
1	11.67	150	1072.9	1074.5	1073.7	1.6	0.8	29.5	0.246	50	53.52	8.5	1	0.183266	3.07418	94.3739	0.513146	0.0939828	0.32988
2	11.67	150	1072.9	1074.5	1073.7	1.6	0.8	29.5	0.246	50	53.52	8.5	1	0.183266	3.07418	94.3739	0.592092	0.0939828	0.408825
3	11.67	150	1072.9	1074.5	1073.7	1.6	0.8	29.5	0.246	50	53.52	8.5	1	0.183266	3.07418	94.3739	0.561077	0.0939828	0.377811
4	11.67	150	1072.9	1074.5	1073.7	1.6	0.8	29.5	0.246	50	53.52	8.5	1	0.183266	3.07418	94.3739	0.562017	0.0939828	0.378751
5	11.67	150	1072.9	1074.5	1073.7	1.6	0.8	29.5	0.246	50	53.52	8.5	1	0.183266	3.07418	94.3739	0.756562	0.0939828	0.573295
6	11.67	150	1072.9	1074.5	1073.7	1.6	0.8	29.5	0.246	50	53.52	8.5	1	0.183266	3.07418	94.3739	0.744344	0.0939828	0.561077
1	9.4	125	851.7	853.8	852.75	1.3	0.6	26.8	0.066	28	70.56	11.5	1	0.221084	4.37291	95.1875	2.02227	0.325123	1.80118
2	9.4	125	851.7	853.8	852.75	1.3	0.6	26.8	0.066	28	70.56	11.5	1	0.221084	4.37291	95.1875	1.74266	0.325123	1.52158
3	9.4	125	851.7	853.8	852.75	1.3	0.6	26.8	0.066	28	70.56	11.5	1	0.221084	4.37291	95.1875	1.92798	0.325123	1.7069
4	9.4	125	851.7	853.8	852.75	1.3	0.6	26.8	0.066	28	70.56	11.5	1	0.221084	4.37291	95.1875	1.5931	0.325123	1.37202
5	9.4	125	851.7	853.8	852.75	1.3	0.6	26.8	0.066	28	70.56	11.5	1	0.221084	4.37291	95.1875	1.51507	0.325123	1.29399
6	9.4	125	851.7	853.8	852.75	1.3	0.6	26.8	0.066	28	70.56	11.5	1	0.221084	4.37291	95.1875	1.3135	0.325123	1.09241
1	9.4	125	860	861.2	860.6	1.2	0.2	27.3	0.083	23	70.56	11.5	1	0.0926765	1.83309	95.1875	0.847718	0.136289	0.755041
2	9.4	125	860	861.2	860.6	1.2	0.2	27.3	0.083	23	70.56	11.5	1	0.0926765	1.83309	95.1875	0.730509	0.136289	0.637833
3	9.4	125	860	861.2	860.6	1.2	0.2	27.3	0.083	23	70.56	11.5	1	0.0926765	1.83309	95.1875	0.808194	0.136289	0.715517
4	9.4	125	860	861.2	860.6	1.2	0.2	27.3	0.083	23	70.56	11.5	1	0.0926765	1.83309	95.1875	0.667816	0.136289	0.57514
5	9.4	125	860	861.2	860.6	1.2	0.2	27.3	0.083	23	70.56	11.5	1	0.0926765	1.83309	95.1875	0.635107	0.136289	0.54243
6	9.4	125	860	861.2	860.6	1.2	0.2	27.3	0.083	23	70.56	11.5	1	0.0926765	1.83309	95.1875	0.550608	0.136289	0.457931
2	10.77	175	946.3	952.4	949.35	6.1	5.7	31.9	0.634	25	100.76	18	1	2.13989	37.1092	94.5479	2.75475	0.484138	0.614855
3	10.77	175	946.3	952.4	949.35	6.1	5.7	31.9	0.634	25	100.76	18	1	2.13989	37.1092	94.5479	3.35992	0.484138	1.22003
4	10.77	175	946.3	952.4	949.35	6.1	5.7	31.9	0.634	25	100.76	18	1	2.13989	37.1092	94.5479	3.95057	0.484138	1.81068
5	10.77	175	946.3	952.4	949.35	6.1	5.7	31.9	0.634	25	100.76	18	1	2.13989	37.1092	94.5479	3.86342	0.484138	1.72353
6	10.77	175	946.3	952.4	949.35	6.1	5.7	31.9	0.634	25	100.76	18	1	2.13989	37.1092	94.5479	3.23888	0.484138	1.09899
2	10.77	175	954.4	956.7	955.55	2.3	1.5	29.6	0.515	23	109.76	19	1	0.457431	7.9326	94.5479	0.588865	0.103491	0.131434
3	10.77	175	954.4	956.7	955.55	2.3	1.5	29.6	0.515	23	109.76	19	1	0.457431	7.9326	94.5479	0.718229	0.103491	0.260798
4	10.77	175	954.4	956.7	955.55	2.3	1.5	29.6	0.515	23	109.76	19	1	0.457431	7.9326	94.5479	0.844489	0.103491	0.387057
5	10.77	175	954.4	956.7	955.55	2.3	1.5	29.6	0.515	23	109.76	19	1	0.457431	7.9326	94.5479	0.82586	0.103491	0.368429
6	10.77	175	954.4	956.7	955.55	2.3	1.5	29.6	0.515	23	109.76	19	1	0.457431	7.9326	94.5479	0.692356	0.103491	0.234925
2	10.77	175	958.6	960.6	959.6	1.6	0.7	25.4	0.137	28	132.16	23	1	0.0567866	0.984772	94.5479	0.0731031	0.0128477	0.0163165
3	10.77	175	958.6	960.6	959.6	1.6	0.7	25.4	0.137	28	132.16	23	1	0.0567866	0.984772	94.5479	0.0891627	0.0128477	0.0323761
4	10.77	175	958.6	960.6	959.6	1.6	0.7	25.4	0.137	28	132.16	23	1	0.0567866	0.984772	94.5479	0.104837	0.0128477	0.0480502
5	10.77	175	958.6	960.6	959.6	1.6	0.7	25.4	0.137	28	132.16	23	1	0.0567866	0.984772	94.5479	0.102524	0.0128477	0.0457376
6	10.77	175	958.6	960.6	959.6	1.6	0.7	25.4	0.137	28	132.16	23	1	0.0567866	0.984772	94.5479	0.0859508	0.0128477	0.0291642
1	10.62	150	1094.5	1099.7	1097.1	5.2	4.9	28.8	0.536	23	71.12	11.5	1	1.09932	10.2819	90.3409	1.84836	0.538881	0.749045
2	10.62	150	1094.5	1099.7	1097.1	5.2	4.9	28.8	0.536	23	71.12	11.5	1	1.09932	10.2819	90.3409	2.26869	0.538881	1.16937
3	10.62	150	1094.5	1099.7	1097.1	5.2	4.9	28.8	0.536	23	71.12	11.5	1	1.09932	10.2819	90.3409	1.76753	0.538881	0.668213
4	10.62	150	1094.5	1099.7	1097.1	5.2	4.9	28.8	0.536	23	71.12	11.5	1	1.09932	10.2819	90.3409	1.69748	0.538881	0.598158
5	10.62	150	1094.5	1099.7	1097.1	5.2	4.9	28.8	0.536	23	71.12	11.5	1	1.09932	10.2819	90.3409	1.40109	0.538881	0.301774
1	10.62	150	1102	1106	1104	2.3	2.1	28.2	0.618	21	114.24	19	1	0.543213	5.08064	90.3409	0.913344	0.266281	0.37013
2	10.62	150	1102	1106	1104	2.3	2.1	28.2	0.618	21	114.24	19	1	0.543213	5.08064	90.3409	1.12104	0.266281	0.57783
3	10.62	150	1102	1106	1104	2.3	2.1	28.2	0.618	21	114.24	19	1	0.543213	5.08064	90.3409	0.873401	0.266281	0.330188
4	10.62	150	1102	1106	1104	2.3	2.1	28.2	0.618	21	114.24	19	1	0.543213	5.08064	90.3409	0.838785	0.266281	0.295572
5	10.62	150	1102	1106	1104	2.3	2.1	28.2	0.618	21	114.24	19	1	0.543213	5.08064	90.3409	0.69233	0.266281	0.149117
1	10.62	150	1123.1	1126.1	1124.6	2.1	1.3	25.6	0.252	18	141.4	23.5	1	0.137122	1.28249	90.3409	0.230553	0.0672165	0.093431
2	10.62	150	1123.1	1126.1	1124.6	2.1	1.3	25.6	0.252	18	141.4	23.5	1	0.137122	1.28249	90.3409	0.282982	0.0672165	0.14586
3	10.62	150	1123.1	1126.1	1124.6	2.1	1.3	25.6	0.252	18	141.4	23.5	1	0.137122	1.28249	90.3409	0.22047	0.0672165	0.0833485
4	10.62	150	1123.1	1126.1	1124.6	2.1	1.3	25.6	0.252	18	141.4	23.5	1	0.137122	1.28249	90.3409	0.211732	0.0672165	0.0746104
5	10.62	150	1123.1	1126.1	1124.6	2.1	1.3	25.6	0.252	18	141.4	23.5	1	0.137122	1.28249	90.3409	0.174763	0.0672165	0.0376413
2	11.6	175	951	954.2	952.6	2.1	0.3	25.5	0.042	25	169.96	28.5	1	0.0112273	0.122072	91.5774	0.0131949	0.00385817	0.00196766
3	11.6	175	951	954.2	952.6	2.1	0.3	25.5	0.042	25	169.96	28.5	1	0.0112273	0.122072	91.5774	0.0168988	0.00385817	0.0056715
4	11.6	175	951	954.2	952.6	2.1	0.3	25.5	0.042	25	169.96	28.5	1	0.0112273	0.122072	91.5774	0.0134264	0.00385817	0.00219915
5	11.6	175	951	954.2	952.6	2.1	0.3	25.5	0.042	25	169.96	28.5	1	0.0112273	0.122072	91.5774	0.0147382	0.00385817	0.00351093
6	11.6	175	951	954.2	952.6	2.1	0.3	25.5	0.042	25	169.96	28.5	1	0.0112273	0.122072	91.5774	0.0168988	0.00385817	0.0056715
2	11.6	175	955.4	956.6	956	1.2	0.3	27.6	0.125	25	271.88	46	1	0.0334145	0.363311	91.5774	0.0392706	0.0114826	0.00585615
3	11.6	175	955.4	956.6	956	1.2	0.3	27.6	0.125	25	271.88	46	1	0.0334145	0.363311	91.5774	0.050294	0.0114826	0.0168795
4	11.6	175	955.4	956.6	956	1.2	0.3	27.6	0.125	25	271.88	46	1	0.0334145	0.363311	91.5774	0.0399596	0.0114826	0.0065451
5	11.6	175	955.4	956.6	956	1.2	0.3	27.6	0.125	25	271.88	46	1	0.0334145	0.363311	91.5774	0.0438637	0.0114826	0.0104492
6	11.6	175	955.4	956.6	956	1.2	0.3	27.6	0.125	25	271.88	46	1	0.0334145	0.363311	91.5774	0.050294	0.0114826	0.0168795
1	11.41	175	952.1	954.5	953.3	2.4	0.5	28	0.324	23	272.16	46	1	0.127086	1.2194	90.5617	0.193392	0.0345342	0.0663057
2	11.41	175	952.1	954.5	953.3	2.4	0.5	28	0.324	23	272.16	46	1	0.127086	1.2194	90.5617	0.219983	0.0345342	0.092897
3	11.41	175	952.1	954.5	953.3	2.4	0.5	28	0.324	23	272.16	46	1	0.127086	1.2194	90.5617	0.308736	0.0345342	0.18165
4	11.41	175	952.1	954.5	953.3	2.4	0.5	28	0.324	23	272.16	46	1	0.127086	1.2194	90.5617	0.147116	0.0345342	0.0200298
5	11.41	175	952.1	954.5	953.3	2.4	0.5	28	0.324	23	272.16	46	1	0.127086	1.2194	90.5617	0.135029	0.0345342	0.00794287
6	11.41	175	952.1	954.5	953.3	2.4	0.5	28	0.324	23	272.16	46	1	0.127086	1.2194	90.5617	0.311153	0.0345342	0.184067
1	11.23	150	1053.9	1055.7	1054.8	1.8	0.4	28.5	0.101	22	114.8	19	1	0.0660975	0.277101	80.7407	0.323285	0.0423702	0.257187
2	11.23	150	1053.9	1055.7	1054.8	1.8	0.4	28.5	0.101	22	114.8	19	1	0.0660975	0.277101	80.7407	0.315234	0.0423702	0.249137
3	11.23	150	1053.9	1055.7	1054.8	1.8	0.4	28.5	0.101	22	114.8	19	1	0.0660975	0.277101	80.7407	0.329217	0.0423702	0.263119
4	11.23	150	1053.9	1055.7	1054.8	1.8	0.4	28.5	0.101	22	114.8	19	1	0.0660975	0.277101	80.7407	0.385569	0.0423702	0.319471
5	11.23	150	1053.9	1055.7	1054.8	1.8	0.4	28.5	0.101	22	114.8	19	1	0.0660975	0.277101	80.7407	0.195327	0.0423702	0.129229
6	11.23	150	1053.9	1055.7	1054.8	1.8	0.4	28.5	0.101	22	114.8	19	1	0.0660975	0.277101	80.7407	0.1877	0.0423702	0.121603
1	7.32	175	933.9	937.5	935.7	3.6	2.2	29.6	1.08	23	140.84	23.5	1	0.400005	2.63161	86.8056	0.950388	0.100252	0.550383
2	7.32	175	933.9	937.5	935.7	3.6	2.2	29.6	1.08	23	140.84	23.5	1	0.400005	2.63161	86.8056	1.15691	0.100252	0.756902
3	7.32	175	933.9	937.5	935.7	3.6	2.2	29.6	1.08	23	140.84	23.5	1	0.400005	2.63161	86.8056	0.777955	0.100252	0.37795
4	7.32	175	933.9	937.5	935.7	3.6	2.2	29.6	1.08	23	140.84	23.5	1	0.400005	2.63161	86.8056	0.703768	0.100252	0.303763
5	7.32	175	933.9	937.5	935.7	3.6	2.2	29.6	1.08	23	140.84	23.5	1	0.400005	2.63161	86.8056	0.643617	0.100252	0.243612
6	7.32	175	933.9	937.5	935.7	3.6	2.2	29.6	1.08	23	140.84	23.5	1	0.400005	2.63161	86.8056	0.726826	0.100252	0.326821
1	7.32	175	939.6	942.6	941.1	3	2.5	29.4	2.54	23	140.84	23.5	1	1.06904	7.03314	86.8056	2.53997	0.267929	1.47093
2	7.32	175	939.6	942.6	941.1	3	2.5	29.4	2.54	23	140.84	23.5	1	1.06904	7.03314	86.8056	3.0919	0.267929	2.02286
3	7.32	175	939.6	942.6	941.1	3	2.5	29.4	2.54	23	140.84	23.5	1	1.06904	7.03314	86.8056	2.07913	0.267929	1.01009
4	7.32	175	939.6	942.6	941.1	3	2.5	29.4	2.54	23	140.84	23.5	1	1.06904	7.03314	86.8056	1.88086	0.267929	0.811825
5	7.32	175	939.6	942.6	941.1	3	2.5	29.4	2.54	23	140.84	23.5	1	1.06904	7.03314	86.8056	1.7201	0.267929	0.651068
6	7.32	175	939.6	942.6	941.1	3	2.5	29.4	2.54	23	140.84	23.5	1	1.06904	7.03314	86.8056	1.94249	0.267929	0.873449
1	7.32	175	944.3	946.2	945.25	1.9	1.1	27.6	0.078	27	140.84	23.5	1	0.0144446	0.0950304	86.8056	0.0343196	0.00362021	0.0198749
2	7.32	175	944.3	946.2	945.25	1.9	1.1	27.6	0.078	27	140.84	23.5	1	0.0144446	0.0950304	86.8056	0.0417772	0.00362021	0.0273326
3	7.32	175	944.3	946.2	945.25	1.9	1.1	27.6	0.078	27	140.84	23.5	1	0.0144446	0.0950304	86.8056	0.0280928	0.00362021	0.0136482
4	7.32	175	944.3	946.2	945.25	1.9	1.1	27.6	0.078	27	140.84	23.5	1	0.0144446	0.0950304	86.8056	0.0254139	0.00362021	0.0109692
5	7.32	175	944.3	946.2	945.25	1.9	1.1	27.6	0.078	27	140.84	23.5	1	0.0144446	0.0950304	86.8056	0.0232417	0.00362021	0.0087971
6	7.32	175	944.3	946.2	945.25	1.9	1.1	27.6	0.078	27	140.84	23.5	1	0.0144446	0.0950304	86.8056	0.0262465	0.00362021	0.0118019
1	12.48	175	970.7	972.9	971.8	2.2	1	31.9	0.71	23	271.88	46	1	1.55184	8.9219	85.1835	2.3347	0.463235	0.782867
2	12.48	175	970.7	972.9	971.8	2.2	1	31.9	0.71	23	271.88	46	1	1.55184	8.9219	85.1835	2.40882	0.463235	0.856984
3	12.48	175	970.7	972.9	971.8	2.2	1	31.9	0.71	23	271.88	46	1	1.55184	8.9219	85.1835	2.39956	0.463235	0.84772
4	12.48	175	970.7	972.9	971.8	2.2	1	31.9	0.71	23	271.88	46	1	1.55184	8.9219	85.1835	2.89522	0.463235	1.34338
5	12.48	175	970.7	972.9	971.8	2.2	1	31.9	0.71	23	271.88	46	1	1.55184	8.9219	85.1835	2.56169	0.463235	1.00985
6	12.48	175	970.7	972.9	971.8	2.2	1	31.9	0.71	23	271.88	46	1	1.55184	8.9219	85.1835	2.07066	0.463235	0.518823
6	9.15	150	878.5	881.6	880.05	2.5	1.7	29.5	0.525	27	90.44	15	1	0.17946	4.78103	96.3822	0.349541	0.0625298	0.170081
6	9.15	150	894.2	895.2	894.7	1	0.3	26.1	0.067	28	90.44	15	1	0.00404163	0.107674	96.3822	0.00787203	0.00140823	0.0038304
1	9.05	150	968.5	969	968.75	0.5	0.5	27.6	0.061	31	91	15	1	0.0102574	0.254757	96.1295	0.0180904	0.00932494	0.00783295
2	9.05	150	968.5	969	968.75	0.5	0.5	27.6	0.061	31	91	15	1	0.0102574	0.254757	96.1295	0.0199554	0.00932494	0.00969793
3	9.05	150	968.5	969	968.75	0.5	0.5	27.6	0.061	31	91	15	1	0.0102574	0.254757	96.1295	0.0160389	0.00932494	0.00578146
4	9.05	150	968.5	969	968.75	0.5	0.5	27.6	0.061	31	91	15	1	0.0102574	0.254757	96.1295	0.0229393	0.00932494	0.0126819
5	9.05	150	968.5	969	968.75	0.5	0.5	27.6	0.061	31	91	15	1	0.0102574	0.254757	96.1295	0.0158524	0.00932494	0.00559496
6	9.05	150	968.5	969	968.75	0.5	0.5	27.6	0.061	31	91	15	1	0.0102574	0.254757	96.1295	0.0103507	0.00932494	9.32494e-05
1	10.6	125	952.3	953.6	952.95	1	0.6	29.3	0.309	25	71.12	11.5	1	0.00521017	0.505386	98.9796	0.0580561	0.0744309	0.052846
2	10.6	125	952.3	953.6	952.95	1	0.6	29.3	0.309	25	71.12	11.5	1	0.00521017	0.505386	98.9796	0.0513573	0.0744309	0.0461472
3	10.6	125	952.3	953.6	952.95	1	0.6	29.3	0.309	25	71.12	11.5	1	0.00521017	0.505386	98.9796	0.0543346	0.0744309	0.0491244
4	10.6	125	952.3	953.6	952.95	1	0.6	29.3	0.309	25	71.12	11.5	1	0.00521017	0.505386	98.9796	0.0416813	0.0744309	0.0364712
5	10.6	125	952.3	953.6	952.95	1	0.6	29.3	0.309	25	71.12	11.5	1	0.00521017	0.505386	98.9796	0.0707094	0.0744309	0.0654992
6	10.6	125	952.3	953.6	952.95	1	0.6	29.3	0.309	25	71.12	11.5	1	0.00521017	0.505386	98.9796	0.0543346	0.0744309	0.0491244
1	11.78	175	982.2	985.5	983.85	2	0.7	29	0.491	26	236.04	40	1	0.068012	1.0875	94.1141	0.189809	0.0347	0.121797
2	11.78	175	982.2	985.5	983.85	2	0.7	29	0.491	26	236.04	40	1	0.068012	1.0875	94.1141	0.190503	0.0347	0.122491
3	11.78	175	982.2	985.5	983.85	2	0.7	29	0.491	26	236.04	40	1	0.068012	1.0875	94.1141	0.125614	0.0347	0.057602
4	11.78	175	982.2	985.5	983.85	2	0.7	29	0.491	26	236.04	40	1	0.068012	1.0875	94.1141	0.130125	0.0347	0.062113
5	11.78	175	982.2	985.5	983.85	2	0.7	29	0.491	26	236.04	40	1	0.068012	1.0875	94.1141	0.131513	0.0347	0.063501
6	11.78	175	982.2	985.5	983.85	2	0.7	29	0.491	26	236.04	40	1	0.068012	1.0875	94.1141	0.176276	0.0347	0.108264
1	11.78	175	1001.6	1004.1	1002.85	2.5	1	32	1.007	24	236.04	40	1	0.199267	3.18624	94.1141	0.556118	0.101667	0.356851
2	11.78	175	1001.6	1004.1	1002.85	2.5	1	32	1.007	24	236.04	40	1	0.199267	3.18624	94.1141	0.558151	0.101667	0.358884
3	11.78	175	1001.6	1004.1	1002.85	2.5	1	32	1.007	24	236.04	40	1	0.199267	3.18624	94.1141	0.368034	0.101667	0.168767
4	11.78	175	1001.6	1004.1	1002.85	2.5	1	32	1.007	24	236.04	40	1	0.199267	3.18624	94.1141	0.381251	0.101667	0.181984
5	11.78	175	1001.6	1004.1	1002.85	2.5	1	32	1.007	24	236.04	40	1	0.199267	3.18624	94.1141	0.385317	0.101667	0.18605
6	11.78	175	1001.6	1004.1	1002.85	2.5	1	32	1.007	24	236.04	40	1	0.199267	3.18624	94.1141	0.516468	0.101667	0.317201
2	9.23	175	1070.2	1082.4	1076.3	3.1	2.2	28	0.311	23	113.59	20	1	0.457356	7.39651	94.1767	0.527123	0.129197	0.0697662
3	9.23	175	1070.2	1082.4	1076.3	3.1	2.2	28	0.311	23	113.59	20	1	0.457356	7.39651	94.1767	0.658903	0.129197	0.201547
4	9.23	175	1070.2	1082.4	1076.3	3.1	2.2	28	0.311	23	113.59	20	1	0.457356	7.39651	94.1767	0.820399	0.129197	0.363043
5	9.23	175	1070.2	1082.4	1076.3	3.1	2.2	28	0.311	23	113.59	20	1	0.457356	7.39651	94.1767	0.817815	0.129197	0.360459
6	9.23	175	1070.2	1082.4	1076.3	3.1	2.2	28	0.311	23	113.59	20	1	0.457356	7.39651	94.1767	0.824275	0.129197	0.366919
2	9.23	175	1084.3	1089.9	1087.1	4.8	2.6	28.4	0.434	29	233.47	40	1	0.754284	12.1985	94.1767	0.869344	0.213075	0.11506
3	9.23	175	1084.3	1089.9	1087.1	4.8	2.6	28.4	0.434	29	233.47	40	1	0.754284	12.1985	94.1767	1.08668	0.213075	0.332396
4	9.23	175	1084.3	1089.9	1087.1	4.8	2.6	28.4	0.434	29	233.47	40	1	0.754284	12.1985	94.1767	1.35302	0.213075	0.598739
5	9.23	175	1084.3	1089.9	1087.1	4.8	2.6	28.4	0.434	29	233.47	40	1	0.754284	12.1985	94.1767	1.34876	0.213075	0.594478
6	9.23	175	1084.3	1089.9	1087.1	4.8	2.6	28.4	0.434	29	233.47	40	1	0.754284	12.1985	94.1767	1.35942	0.213075	0.605132
1	11.6	175	961	962.8	961.9	1.8	1.1	27.5	0.168	29	202.16	18	1	0.0335763	0.989463	96.718	0.0781373	0.0207261	0.0445611
2	11.6	175	961	962.8	961.9	1.8	1.1	27.5	0.168	29	202.16	18	1	0.0335763	0.989463	96.718	0.116273	0.0207261	0.0826971
3	11.6	175	961	962.8	961.9	1.8	1.1	27.5	0.168	29	202.16	18	1	0.0335763	0.989463	96.718	0.119382	0.0207261	0.085806
4	11.6	175	961	962.8	961.9	1.8	1.1	27.5	0.168	29	202.16	18	1	0.0335763	0.989463	96.718	0.121455	0.0207261	0.0878786
5	11.6	175	961	962.8	961.9	1.8	1.1	27.5	0.168	29	202.16	18	1	0.0335763	0.989463	96.718	0.133891	0.0207261	0.100314
6	11.6	175	961	962.8	961.9	1.8	1.1	27.5	0.168	29	202.16	18	1	0.0335763	0.989463	96.718	0.137828	0.0207261	0.104252
1	11.6	175	964.3	968	966.15	3.7	3	30.1	0.793	26	71.12	11.5	1	0.43224	12.7377	96.718	1.00589	0.266815	0.573652
2	11.6	175	964.3	968	966.15	3.7	3	30.1	0.793	26	71.12	11.5	1	0.43224	12.7377	96.718	1.49683	0.266815	1.06459
3	11.6	175	964.3	968	966.15	3.7	3	30.1	0.793	26	71.12	11.5	1	0.43224	12.7377	96.718	1.53685	0.266815	1.10461
4	11.6	175	964.3	968	966.15	3.7	3	30.1	0.793	26	71.12	11.5	1	0.43224	12.7377	96.718	1.56353	0.266815	1.13129
5	11.6	175	964.3	968	966.15	3.7	3	30.1	0.793	26	71.12	11.5	1	0.43224	12.7377	96.718	1.72362	0.266815	1.29138
6	11.6	175	964.3	968	966.15	3.7	3	30.1	0.793	26	71.12	11.5	1	0.43224	12.7377	96.718	1.77432	0.266815	1.34208
3	7.76	150	925.2	926.2	925.7	1	0.5	28.6	0.123	23	284.16	19	1	0.0477367	0.553307	92.0577	0.0647138	0.00912747	0.0169771
1	10.82	150	925.4	929.1	927.25	2.8	1.9	30.1	0.313	30	70.84	11.5	1	0.89766	4.891	84.4928	1.22182	0.124675	0.324155
2	10.82	150	925.4	929.1	927.25	2.8	1.9	30.1	0.313	30	70.84	11.5	1	0.89766	4.891	84.4928	1.53226	0.124675	0.634596
3	10.82	150	925.4	929.1	927.25	2.8	1.9	30.1	0.313	30	70.84	11.5	1	0.89766	4.891	84.4928	1.43875	0.124675	0.54109
4	10.82	150	925.4	929.1	927.25	2.8	1.9	30.1	0.313	30	70.84	11.5	1	0.89766	4.891	84.4928	1.27917	0.124675	0.381506
5	10.82	150	925.4	929.1	927.25	2.8	1.9	30.1	0.313	30	70.84	11.5	1	0.89766	4.891	84.4928	1.3415	0.124675	0.443843
6	10.82	150	925.4	929.1	927.25	2.8	1.9	30.1	0.313	30	70.84	11.5	1	0.89766	4.891	84.4928	1.46119	0.124675	0.563531
3	11.82	150	883.3	885.4	884.35	2.1	1	29.6	0.425	11	52.8	8.5	1	0.400272	3.09403	88.545	0.431424	0.0587772	0.0311519
3	11.82	150	895	895.8	895.4	0.8	0.8	28.5	0.368	21	90.96	15	1	0.277271	2.14325	88.545	0.29885	0.0407153	0.0215791
3	11.82	150	897.3	899.3	898.3	2	1.3	29.3	0.463	12	140	23.5	1	0.56688	4.38187	88.545	0.610998	0.0832423	0.0441184
1	10.35	175	919.4	920.6	920	1.2	0.8	31.3	0.622	24	114.24	19	1	0.201107	1.61405	88.9207	0.266119	0.0866839	0.0650129
2	10.35	175	919.4	920.6	920	1.2	0.8	31.3	0.622	24	114.24	19	1	0.201107	1.61405	88.9207	0.261785	0.0866839	0.0606787
3	10.35	175	919.4	920.6	920	1.2	0.8	31.3	0.622	24	114.24	19	1	0.201107	1.61405	88.9207	0.227979	0.0866839	0.026872
1	10.35	175	932.4	937.5	934.95	4.7	2.9	31.6	0.877	22	90.96	15	1	1.02788	8.24964	88.9207	1.36017	0.443053	0.33229
2	10.35	175	932.4	937.5	934.95	4.7	2.9	31.6	0.877	22	90.96	15	1	1.02788	8.24964	88.9207	1.33802	0.443053	0.310137
3	10.35	175	932.4	937.5	934.95	4.7	2.9	31.6	0.877	22	90.96	15	1	1.02788	8.24964	88.9207	1.16523	0.443053	0.137346
1	9.24	125	946.2	950.7	948.45	4.5	3.7	32.2	1.28	19	69.84	11.5	1	0.833362	11.3538	93.162	1.51008	0.626588	0.676715
2	9.24	125	946.2	950.7	948.45	4.5	3.7	32.2	1.28	19	69.84	11.5	1	0.833362	11.3538	93.162	1.52261	0.626588	0.689246
3	9.24	125	946.2	950.7	948.45	4.5	3.7	32.2	1.28	19	69.84	11.5	1	0.833362	11.3538	93.162	2.19932	0.626588	1.36596
4	9.24	125	946.2	950.7	948.45	4.5	3.7	32.2	1.28	19	69.84	11.5	1	0.833362	11.3538	93.162	1.8171	0.626588	0.983743
1	9.24	125	960.8	963.7	962.25	1.4	0.7	28.5	0.292	20	77.28	11.5	1	0.0359669	0.490015	93.162	0.0651731	0.0270428	0.0292062
2	9.24	125	960.8	963.7	962.25	1.4	0.7	28.5	0.292	20	77.28	11.5	1	0.0359669	0.490015	93.162	0.0657139	0.0270428	0.029747
3	9.24	125	960.8	963.7	962.25	1.4	0.7	28.5	0.292	20	77.28	11.5	1	0.0359669	0.490015	93.162	0.0949201	0.0270428	0.0589532
4	9.24	125	960.8	963.7	962.25	1.4	0.7	28.5	0.292	20	77.28	11.5	1	0.0359669	0.490015	93.162	0.078424	0.0270428	0.0424571
1	9.24	125	965.5	968.9	967.2	3.4	1.2	30.4	0.301	23	78.24	11.5	1	0.0635579	0.865917	93.162	0.115169	0.0477879	0.0516109
2	9.24	125	965.5	968.9	967.2	3.4	1.2	30.4	0.301	23	78.24	11.5	1	0.0635579	0.865917	93.162	0.116125	0.0477879	0.0525667
3	9.24	125	965.5	968.9	967.2	3.4	1.2	30.4	0.301	23	78.24	11.5	1	0.0635579	0.865917	93.162	0.167735	0.0477879	0.104178
4	9.24	125	965.5	968.9	967.2	3.4	1.2	30.4	0.301	23	78.24	11.5	1	0.0635579	0.865917	93.162	0.138585	0.0477879	0.075027
1	10.08	150	935.2	938.6	936.9	1.8	0.5	25.3	0.122	24	90.72	15	1	0.0425143	0.451845	91.4001	0.0848393	0.00946867	0.0423249
2	10.08	150	935.2	938.6	936.9	1.8	0.5	25.3	0.122	24	90.72	15	1	0.0425143	0.451845	91.4001	0.0939292	0.00946867	0.0514149
3	10.08	150	935.2	938.6	936.9	1.8	0.5	25.3	0.122	24	90.72	15	1	0.0425143	0.451845	91.4001	0.0901417	0.00946867	0.0476274
4	10.08	150	935.2	938.6	936.9	1.8	0.5	25.3	0.122	24	90.72	15	1	0.0425143	0.451845	91.4001	0.0521724	0.00946867	0.00965804
5	10.08	150	935.2	938.6	936.9	1.8	0.5	25.3	0.122	24	90.72	15	1	0.0425143	0.451845	91.4001	0.0476274	0.00946867	0.00511308
6	10.08	150	935.2	938.6	936.9	1.8	0.5	25.3	0.122	24	90.72	15	1	0.0425143	0.451845	91.4001	0.0492371	0.00946867	0.00672275
1	10.08	150	944.6	951	947.8	5.1	3.1	28.7	0.651	28	90.72	15	1	1.40653	14.9487	91.4001	2.80679	0.313258	1.40026
2	10.08	150	944.6	951	947.8	5.1	3.1	28.7	0.651	28	90.72	15	1	1.40653	14.9487	91.4001	3.10752	0.313258	1.70099
3	10.08	150	944.6	951	947.8	5.1	3.1	28.7	0.651	28	90.72	15	1	1.40653	14.9487	91.4001	2.98221	0.313258	1.57569
4	10.08	150	944.6	951	947.8	5.1	3.1	28.7	0.651	28	90.72	15	1	1.40653	14.9487	91.4001	1.72605	0.313258	0.319523
5	10.08	150	944.6	951	947.8	5.1	3.1	28.7	0.651	28	90.72	15	1	1.40653	14.9487	91.4001	1.57569	0.313258	0.169159
6	10.08	150	944.6	951	947.8	5.1	3.1	28.7	0.651	28	90.72	15	1	1.40653	14.9487	91.4001	1.62894	0.313258	0.222413
1	10.08	150	953.1	959	956.05	5.9	5.1	31.6	0.75	23	91	15	1	2.66586	28.3329	91.4001	5.31984	0.593732	2.65398
2	10.08	150	953.1	959	956.05	5.9	5.1	31.6	0.75	23	91	15	1	2.66586	28.3329	91.4001	5.88982	0.593732	3.22397
3	10.08	150	953.1	959	956.05	5.9	5.1	31.6	0.75	23	91	15	1	2.66586	28.3329	91.4001	5.65233	0.593732	2.98647
4	10.08	150	953.1	959	956.05	5.9	5.1	31.6	0.75	23	91	15	1	2.66586	28.3329	91.4001	3.27146	0.593732	0.605607
5	10.08	150	953.1	959	956.05	5.9	5.1	31.6	0.75	23	91	15	1	2.66586	28.3329	91.4001	2.98647	0.593732	0.320615
6	10.08	150	953.1	959	956.05	5.9	5.1	31.6	0.75	23	91	15	1	2.66586	28.3329	91.4001	3.08741	0.593732	0.42155
1	12.63	150	1061.2	1063.3	1062.25	2.1	0.5	26.7	0.282	25	175.56	29.5	1	2.33012	32.5262	93.3151	6.9824	0.795262	4.65228
2	12.63	150	1061.2	1063.3	1062.25	2.1	0.5	26.7	0.282	25	175.56	29.5	1	2.33012	32.5262	93.3151	5.31235	0.795262	2.98223
3	12.63	150	1061.2	1063.3	1062.25	2.1	0.5	26.7	0.282	25	175.56	29.5	1	2.33012	32.5262	93.3151	3.1731	0.795262	0.842978
4	12.63	150	1061.2	1063.3	1062.25	2.1	0.5	26.7	0.282	25	175.56	29.5	1	2.33012	32.5262	93.3151	4.0797	0.795262	1.74958
5	12.63	150	1061.2	1063.3	1062.25	2.1	0.5	26.7	0.282	25	175.56	29.5	1	2.33012	32.5262	93.3151	4.00017	0.795262	1.67005
6	12.63	150	1061.2	1063.3	1062.25	2.1	0.5	26.7	0.282	25	175.56	29.5	1	2.33012	32.5262	93.3151	3.6264	0.795262	1.29628
1	12.63	150	1068	1072.4	1070.2	3	1.9	19.2	0.009	25	202.44	34	1	0.282589	3.94467	93.3151	0.846802	0.0964467	0.564213
2	12.63	150	1068	1072.4	1070.2	3	1.9	19.2	0.009	25	202.44	34	1	0.282589	3.94467	93.3151	0.644264	0.0964467	0.361675
3	12.63	150	1068	1072.4	1070.2	3	1.9	19.2	0.009	25	202.44	34	1	0.282589	3.94467	93.3151	0.384822	0.0964467	0.102234
4	12.63	150	1068	1072.4	1070.2	3	1.9	19.2	0.009	25	202.44	34	1	0.282589	3.94467	93.3151	0.494772	0.0964467	0.212183
5	12.63	150	1068	1072.4	1070.2	3	1.9	19.2	0.009	25	202.44	34	1	0.282589	3.94467	93.3151	0.485127	0.0964467	0.202538
6	12.63	150	1068	1072.4	1070.2	3	1.9	19.2	0.009	25	202.44	34	1	0.282589	3.94467	93.3151	0.439797	0.0964467	0.157208
1	12.63	150	1084.3	1086.5	1085.4	1.7	0.3	24.4	0.064	32	202.44	34	1	0.317293	4.4291	93.3151	0.950795	0.108291	0.633503
2	12.63	150	1084.3	1086.5	1085.4	1.7	0.3	24.4	0.064	32	202.44	34	1	0.317293	4.4291	93.3151	0.723384	0.108291	0.406091
3	12.63	150	1084.3	1086.5	1085.4	1.7	0.3	24.4	0.064	32	202.44	34	1	0.317293	4.4291	93.3151	0.432081	0.108291	0.114788
4	12.63	150	1084.3	1086.5	1085.4	1.7	0.3	24.4	0.064	32	202.44	34	1	0.317293	4.4291	93.3151	0.555533	0.108291	0.23824
5	12.63	150	1084.3	1086.5	1085.4	1.7	0.3	24.4	0.064	32	202.44	34	1	0.317293	4.4291	93.3151	0.544704	0.108291	0.227411
6	12.63	150	1084.3	1086.5	1085.4	1.7	0.3	24.4	0.064	32	202.44	34	1	0.317293	4.4291	93.3151	0.493807	0.108291	0.176514
1	11.76	150	978.4	980.3	979.35	1.9	1.2	29.4	0.406	29	53.28	8.5	1	0.270094	2.98153	91.6936	0.337856	0.0954396	0.0677621
2	11.76	150	978.4	980.3	979.35	1.9	1.2	29.4	0.406	29	53.28	8.5	1	0.270094	2.98153	91.6936	0.303498	0.0954396	0.0334039
3	11.76	150	978.4	980.3	979.35	1.9	1.2	29.4	0.406	29	53.28	8.5	1	0.270094	2.98153	91.6936	0.280592	0.0954396	0.0104984
1	11.76	150	984.8	988.2	986.5	2.4	0.7	31.4	0.228	27	91.28	15	1	0.0884791	0.976709	91.6936	0.110677	0.0312647	0.0221979
2	11.76	150	984.8	988.2	986.5	2.4	0.7	31.4	0.228	27	91.28	15	1	0.0884791	0.976709	91.6936	0.0994217	0.0312647	0.0109426
3	11.76	150	984.8	988.2	986.5	2.4	0.7	31.4	0.228	27	91.28	15	1	0.0884791	0.976709	91.6936	0.0919182	0.0312647	0.00343912
1	11.76	150	991.6	992.6	992.1	1	1	29.6	0.266	25	70.84	11.5	1	0.147465	1.62785	91.6936	0.184462	0.0521078	0.0369966
2	11.76	150	991.6	992.6	992.1	1	1	29.6	0.266	25	70.84	11.5	1	0.147465	1.62785	91.6936	0.165703	0.0521078	0.0182377
3	11.76	150	991.6	992.6	992.1	1	1	29.6	0.266	25	70.84	11.5	1	0.147465	1.62785	91.6936	0.153197	0.0521078	0.00573186
1	9.32	175	1036.4	1037.8	1037.1	1.4	1.3	29.7	0.609	22	143.82	23.5	1	0.128889	2.12295	94.2763	0.149661	0.0532601	0.0207714
2	9.32	175	1036.4	1037.8	1037.1	1.4	1.3	29.7	0.609	22	143.82	23.5	1	0.128889	2.12295	94.2763	0.137411	0.0532601	0.00852161
4	9.32	175	1036.4	1037.8	1037.1	1.4	1.3	29.7	0.609	22	143.82	23.5	1	0.128889	2.12295	94.2763	0.164574	0.0532601	0.0356842
5	9.32	175	1036.4	1037.8	1037.1	1.4	1.3	29.7	0.609	22	143.82	23.5	1	0.128889	2.12295	94.2763	0.154987	0.0532601	0.0260974
6	9.32	175	1036.4	1037.8	1037.1	1.4	1.3	29.7	0.609	22	143.82	23.5	1	0.128889	2.12295	94.2763	0.167769	0.0532601	0.0388798
1	11.78	175	985.2	988.5	986.85	2.6	1.3	31.5	1.007	23	94.64	15	1	0.460104	4.5152	90.7523	0.667699	0.0998056	0.207596
2	11.78	175	985.2	988.5	986.85	2.6	1.3	31.5	1.007	23	94.64	15	1	0.460104	4.5152	90.7523	0.7186	0.0998056	0.258496
3	11.78	175	985.2	988.5	986.85	2.6	1.3	31.5	1.007	23	94.64	15	1	0.460104	4.5152	90.7523	0.804433	0.0998056	0.344329
4	11.78	175	985.2	988.5	986.85	2.6	1.3	31.5	1.007	23	94.64	15	1	0.460104	4.5152	90.7523	0.899248	0.0998056	0.439145
5	11.78	175	985.2	988.5	986.85	2.6	1.3	31.5	1.007	23	94.64	15	1	0.460104	4.5152	90.7523	0.917213	0.0998056	0.45711
6	11.78	175	985.2	988.5	986.85	2.6	1.3	31.5	1.007	23	94.64	15	1	0.460104	4.5152	90.7523	0.919209	0.0998056	0.459106
1	11.78	175	1002	1005.7	1003.85	3.7	2.9	30	0.92	23	117.32	19	1	0.937711	9.20217	90.7523	1.3608	0.203408	0.423088
2	11.78	175	1002	1005.7	1003.85	3.7	2.9	30	0.92	23	117.32	19	1	0.937711	9.20217	90.7523	1.46454	0.203408	0.526827
3	11.78	175	1002	1005.7	1003.85	3.7	2.9	30	0.92	23	117.32	19	1	0.937711	9.20217	90.7523	1.63947	0.203408	0.701757
4	11.78	175	1002	1005.7	1003.85	3.7	2.9	30	0.92	23	117.32	19	1	0.937711	9.20217	90.7523	1.83271	0.203408	0.894995
5	11.78	175	1002	1005.7	1003.85	3.7	2.9	30	0.92	23	117.32	19	1	0.937711	9.20217	90.7523	1.86932	0.203408	0.931608
6	11.78	175	1002	1005.7	1003.85	3.7	2.9	30	0.92	23	117.32	19	1	0.937711	9.20217	90.7523	1.87339	0.203408	0.935676
1	11.78	175	1008.4	1010.7	1009.55	2.3	1.8	29	0.613	24	145.04	23.5	1	0.387807	3.80573	90.7523	0.562783	0.0841231	0.174976
2	11.78	175	1008.4	1010.7	1009.55	2.3	1.8	29	0.613	24	145.04	23.5	1	0.387807	3.80573	90.7523	0.605686	0.0841231	0.217879
3	11.78	175	1008.4	1010.7	1009.55	2.3	1.8	29	0.613	24	145.04	23.5	1	0.387807	3.80573	90.7523	0.678032	0.0841231	0.290225
4	11.78	175	1008.4	1010.7	1009.55	2.3	1.8	29	0.613	24	145.04	23.5	1	0.387807	3.80573	90.7523	0.757949	0.0841231	0.370141
5	11.78	175	1008.4	1010.7	1009.55	2.3	1.8	29	0.613	24	145.04	23.5	1	0.387807	3.80573	90.7523	0.773091	0.0841231	0.385284
6	11.78	175	1008.4	1010.7	1009.55	2.3	1.8	29	0.613	24	145.04	23.5	1	0.387807	3.80573	90.7523	0.774773	0.0841231	0.386966
1	11.78	175	977.8	980.3	979.05	2.1	1.7	26.4	0.925	26	169.96	28.5	1	0.671433	8.28027	92.4994	1.0977	0.220866	0.426271
2	11.78	175	977.8	980.3	979.05	2.1	1.7	26.4	0.925	26	169.96	28.5	1	0.671433	8.28027	92.4994	1.00273	0.220866	0.331299
3	11.78	175	977.8	980.3	979.05	2.1	1.7	26.4	0.925	26	169.96	28.5	1	0.671433	8.28027	92.4994	0.852543	0.220866	0.18111
4	11.78	175	977.8	980.3	979.05	2.1	1.7	26.4	0.925	26	169.96	28.5	1	0.671433	8.28027	92.4994	0.914385	0.220866	0.242953
5	11.78	175	977.8	980.3	979.05	2.1	1.7	26.4	0.925	26	169.96	28.5	1	0.671433	8.28027	92.4994	1.00715	0.220866	0.335716
6	11.78	175	977.8	980.3	979.05	2.1	1.7	26.4	0.925	26	169.96	28.5	1	0.671433	8.28027	92.4994	1.25452	0.220866	0.583086
1	11.78	175	989.2	994.4	991.8	5.2	4.3	30.4	0.56	23	141.12	23.5	1	1.02818	12.6797	92.4994	1.68094	0.338216	0.652758
2	11.78	175	989.2	994.4	991.8	5.2	4.3	30.4	0.56	23	141.12	23.5	1	1.02818	12.6797	92.4994	1.5355	0.338216	0.507325
3	11.78	175	989.2	994.4	991.8	5.2	4.3	30.4	0.56	23	141.12	23.5	1	1.02818	12.6797	92.4994	1.30552	0.338216	0.277338
4	11.78	175	989.2	994.4	991.8	5.2	4.3	30.4	0.56	23	141.12	23.5	1	1.02818	12.6797	92.4994	1.40022	0.338216	0.372038
5	11.78	175	989.2	994.4	991.8	5.2	4.3	30.4	0.56	23	141.12	23.5	1	1.02818	12.6797	92.4994	1.54227	0.338216	0.514089
6	11.78	175	989.2	994.4	991.8	5.2	4.3	30.4	0.56	23	141.12	23.5	1	1.02818	12.6797	92.4994	1.92107	0.338216	0.892892
1	8.78	175	1033.5	1037.2	1035.35	3.3	2.6	29.6	0.384	28	114.8	19	1	0.259367	4.91784	94.9902	0.978704	0.20263	0.719338
2	8.78	175	1033.5	1037.2	1035.35	3.3	2.6	29.6	0.384	28	114.8	19	1	0.259367	4.91784	94.9902	0.701101	0.20263	0.441734
3	8.78	175	1033.5	1037.2	1035.35	3.3	2.6	29.6	0.384	28	114.8	19	1	0.259367	4.91784	94.9902	0.861179	0.20263	0.601812
4	8.78	175	1033.5	1037.2	1035.35	3.3	2.6	29.6	0.384	28	114.8	19	1	0.259367	4.91784	94.9902	1.02936	0.20263	0.769995
5	8.78	175	1033.5	1037.2	1035.35	3.3	2.6	29.6	0.384	28	114.8	19	1	0.259367	4.91784	94.9902	0.950336	0.20263	0.690969
6	8.78	175	1033.5	1037.2	1035.35	3.3	2.6	29.6	0.384	28	114.8	19	1	0.259367	4.91784	94.9902	0.889547	0.20263	0.63018
1	8.78	175	1037.8	1043.9	1040.85	6.1	3.9	31.2	0.519	25	119.8	19	1	0.525826	9.97015	94.9902	1.98417	0.410801	1.45834
2	8.78	175	1037.8	1043.9	1040.85	6.1	3.9	31.2	0.519	25	119.8	19	1	0.525826	9.97015	94.9902	1.42137	0.410801	0.895547
3	8.78	175	1037.8	1043.9	1040.85	6.1	3.9	31.2	0.519	25	119.8	19	1	0.525826	9.97015	94.9902	1.74591	0.410801	1.22008
4	8.78	175	1037.8	1043.9	1040.85	6.1	3.9	31.2	0.519	25	119.8	19	1	0.525826	9.97015	94.9902	2.08687	0.410801	1.56104
5	8.78	175	1037.8	1043.9	1040.85	6.1	3.9	31.2	0.519	25	119.8	19	1	0.525826	9.97015	94.9902	1.92666	0.410801	1.40083
6	8.78	175	1037.8	1043.9	1040.85	6.1	3.9	31.2	0.519	25	119.8	19	1	0.525826	9.97015	94.9902	1.80342	0.410801	1.27759
1	8.78	175	1048.9	1055.2	1052.05	6.3	2.1	31.8	0.907	42	141.4	23.5	1	0.494808	9.38202	94.9902	1.86713	0.386568	1.37232
2	8.78	175	1048.9	1055.2	1052.05	6.3	2.1	31.8	0.907	42	141.4	23.5	1	0.494808	9.38202	94.9902	1.33753	0.386568	0.842719
[truncated: 2,777 more rows]
