# Supplementary material for: Data-driven intelligent productivity prediction model for horizontal fracture stimulation
Source: Frontiers journal article supplement (doi:10.3389/feart.2025.1601363), 2025-08-01
Supplement: Table_9.xlsx [file Table_9.xlsx]

## Sheet: 02
Post-fracture duration(mon)	Clustering results	present fomraiton pressure(MPa)	well spacing(m)	depth at the top(m)	oil bed depth(m)	Depth of the central part of the oil layer(m)	Sandstone thickness(m)	Effective thickness(m)	Porosity(%)	permeability(μm)	Breakdown pressure(MPa)	Total liquid volume(m^3)	quantity of sand added(m^3)	Number of fracture slits (slits)	Daily oil production from small layer before fracturing (t)	Daily water production from small layer before fracturing (t)	pre-fracture water content(%)	Production capacity splitting factor(1)	Daily oil increase(t)
1	2	9.66	125	895.6	903.5	899.55	4.3	0.8	26.6	0.063	30	227.08	37	2	0.0721485	0.781642	91.5496	0.0199857	0.0117916
2	2	9.66	125	895.6	903.5	899.55	4.3	0.8	26.6	0.063	30	227.08	37	2	0.0721485	0.781642	91.5496	0.0199857	0.0403712
3	2	9.66	125	895.6	903.5	899.55	4.3	0.8	26.6	0.063	30	227.08	37	2	0.0721485	0.781642	91.5496	0.0199857	0.008394
4	2	9.66	125	895.6	903.5	899.55	4.3	0.8	26.6	0.063	30	227.08	37	2	0.0721485	0.781642	91.5496	0.0199857	0.0119914
5	2	9.66	125	895.6	903.5	899.55	4.3	0.8	26.6	0.063	30	227.08	37	2	0.0721485	0.781642	91.5496	0.0199857	0.0143897
6	2	9.66	125	895.6	903.5	899.55	4.3	0.8	26.6	0.063	30	227.08	37	2	0.0721485	0.781642	91.5496	0.0199857	0.008394
7	2	9.66	125	895.6	903.5	899.55	4.3	0.8	26.6	0.063	30	227.08	37	2	0.0721485	0.781642	91.5496	0.0199857	0.0179872
8	2	9.66	125	895.6	903.5	899.55	4.3	0.8	26.6	0.063	30	227.08	37	2	0.0721485	0.781642	91.5496	0.0199857	0.00919343
1	2	9.66	125	905.5	910.9	908.2	4.1	1.7	29.6	0.348	28	182.4	29	2	0.846886	9.17498	91.5496	0.234594	0.138411
2	2	9.66	125	905.5	910.9	908.2	4.1	1.7	29.6	0.348	28	182.4	29	2	0.846886	9.17498	91.5496	0.234594	0.473881
3	2	9.66	125	905.5	910.9	908.2	4.1	1.7	29.6	0.348	28	182.4	29	2	0.846886	9.17498	91.5496	0.234594	0.0985296
4	2	9.66	125	905.5	910.9	908.2	4.1	1.7	29.6	0.348	28	182.4	29	2	0.846886	9.17498	91.5496	0.234594	0.140757
5	2	9.66	125	905.5	910.9	908.2	4.1	1.7	29.6	0.348	28	182.4	29	2	0.846886	9.17498	91.5496	0.234594	0.168908
6	2	9.66	125	905.5	910.9	908.2	4.1	1.7	29.6	0.348	28	182.4	29	2	0.846886	9.17498	91.5496	0.234594	0.0985296
7	2	9.66	125	905.5	910.9	908.2	4.1	1.7	29.6	0.348	28	182.4	29	2	0.846886	9.17498	91.5496	0.234594	0.211135
8	2	9.66	125	905.5	910.9	908.2	4.1	1.7	29.6	0.348	28	182.4	29	2	0.846886	9.17498	91.5496	0.234594	0.107913
1	2	13.75	150	1135.7	1141.9	1138.8	5.1	3.3	28.4	0.438	33	181.08	29	2	0.934945	4.49866	82.7933	0.607107	0.182132
1	2	13.75	150	1150.3	1155	1152.65	3.2	1.7	27.2	0.186	37	180.6	29	2	0.25939	5.96117	95.8301	0.160117	0.174528
2	2	13.75	150	1150.3	1155	1152.65	3.2	1.7	27.2	0.186	37	180.6	29	2	0.25939	5.96117	95.8301	0.160117	0.320235
3	2	13.75	150	1150.3	1155	1152.65	3.2	1.7	27.2	0.186	37	180.6	29	2	0.25939	5.96117	95.8301	0.160117	0.336247
4	2	13.75	150	1150.3	1155	1152.65	3.2	1.7	27.2	0.186	37	180.6	29	2	0.25939	5.96117	95.8301	0.160117	0.184135
5	2	13.75	150	1150.3	1155	1152.65	3.2	1.7	27.2	0.186	37	180.6	29	2	0.25939	5.96117	95.8301	0.160117	0.212956
6	2	13.75	150	1150.3	1155	1152.65	3.2	1.7	27.2	0.186	37	180.6	29	2	0.25939	5.96117	95.8301	0.160117	0.321836
7	2	13.75	150	1150.3	1155	1152.65	3.2	1.7	27.2	0.186	37	180.6	29	2	0.25939	5.96117	95.8301	0.160117	0.265795
8	2	13.75	150	1150.3	1155	1152.65	3.2	1.7	27.2	0.186	37	180.6	29	2	0.25939	5.96117	95.8301	0.160117	0.212956
9	2	13.75	150	1150.3	1155	1152.65	3.2	1.7	27.2	0.186	37	180.6	29	2	0.25939	5.96117	95.8301	0.160117	0.15051
10	2	13.75	150	1150.3	1155	1152.65	3.2	1.7	27.2	0.186	37	180.6	29	2	0.25939	5.96117	95.8301	0.160117	0.091267
11	2	13.75	150	1150.3	1155	1152.65	3.2	1.7	27.2	0.186	37	180.6	29	2	0.25939	5.96117	95.8301	0.160117	0.0880646
1	2	13.75	150	1164.1	1168.7	1166.4	3.2	2	29.2	0.441	28	180.6	29	2	0.723537	16.6279	95.8301	0.446628	0.486824
2	2	13.75	150	1164.1	1168.7	1166.4	3.2	2	29.2	0.441	28	180.6	29	2	0.723537	16.6279	95.8301	0.446628	0.893255
3	2	13.75	150	1164.1	1168.7	1166.4	3.2	2	29.2	0.441	28	180.6	29	2	0.723537	16.6279	95.8301	0.446628	0.937918
4	2	13.75	150	1164.1	1168.7	1166.4	3.2	2	29.2	0.441	28	180.6	29	2	0.723537	16.6279	95.8301	0.446628	0.513622
5	2	13.75	150	1164.1	1168.7	1166.4	3.2	2	29.2	0.441	28	180.6	29	2	0.723537	16.6279	95.8301	0.446628	0.594015
6	2	13.75	150	1164.1	1168.7	1166.4	3.2	2	29.2	0.441	28	180.6	29	2	0.723537	16.6279	95.8301	0.446628	0.897721
7	2	13.75	150	1164.1	1168.7	1166.4	3.2	2	29.2	0.441	28	180.6	29	2	0.723537	16.6279	95.8301	0.446628	0.741402
8	2	13.75	150	1164.1	1168.7	1166.4	3.2	2	29.2	0.441	28	180.6	29	2	0.723537	16.6279	95.8301	0.446628	0.594015
9	2	13.75	150	1164.1	1168.7	1166.4	3.2	2	29.2	0.441	28	180.6	29	2	0.723537	16.6279	95.8301	0.446628	0.41983
10	2	13.75	150	1164.1	1168.7	1166.4	3.2	2	29.2	0.441	28	180.6	29	2	0.723537	16.6279	95.8301	0.446628	0.254578
11	2	13.75	150	1164.1	1168.7	1166.4	3.2	2	29.2	0.441	28	180.6	29	2	0.723537	16.6279	95.8301	0.446628	0.245645
1	2	13.75	150	1171.2	1175.1	1173.15	3.5	2.2	28.5	0.353	29	180.6	29	2	0.637073	14.6409	95.8301	0.393255	0.428648
2	2	13.75	150	1171.2	1175.1	1173.15	3.5	2.2	28.5	0.353	29	180.6	29	2	0.637073	14.6409	95.8301	0.393255	0.78651
3	2	13.75	150	1171.2	1175.1	1173.15	3.5	2.2	28.5	0.353	29	180.6	29	2	0.637073	14.6409	95.8301	0.393255	0.825836
4	2	13.75	150	1171.2	1175.1	1173.15	3.5	2.2	28.5	0.353	29	180.6	29	2	0.637073	14.6409	95.8301	0.393255	0.452243
5	2	13.75	150	1171.2	1175.1	1173.15	3.5	2.2	28.5	0.353	29	180.6	29	2	0.637073	14.6409	95.8301	0.393255	0.523029
6	2	13.75	150	1171.2	1175.1	1173.15	3.5	2.2	28.5	0.353	29	180.6	29	2	0.637073	14.6409	95.8301	0.393255	0.790443
7	2	13.75	150	1171.2	1175.1	1173.15	3.5	2.2	28.5	0.353	29	180.6	29	2	0.637073	14.6409	95.8301	0.393255	0.652803
8	2	13.75	150	1171.2	1175.1	1173.15	3.5	2.2	28.5	0.353	29	180.6	29	2	0.637073	14.6409	95.8301	0.393255	0.523029
9	2	13.75	150	1171.2	1175.1	1173.15	3.5	2.2	28.5	0.353	29	180.6	29	2	0.637073	14.6409	95.8301	0.393255	0.36966
10	2	13.75	150	1171.2	1175.1	1173.15	3.5	2.2	28.5	0.353	29	180.6	29	2	0.637073	14.6409	95.8301	0.393255	0.224155
11	2	13.75	150	1171.2	1175.1	1173.15	3.5	2.2	28.5	0.353	29	180.6	29	2	0.637073	14.6409	95.8301	0.393255	0.21629
1	2	9.36	175	977.1	980	978.55	2.4	1.4	32.3	0.408	53	320	45	2	0.489078	7.21256	93.6497	0.268724	0.747053
2	2	9.36	175	977.1	980	978.55	2.4	1.4	32.3	0.408	53	320	45	2	0.489078	7.21256	93.6497	0.268724	0.747053
3	2	9.36	175	977.1	980	978.55	2.4	1.4	32.3	0.408	53	320	45	2	0.489078	7.21256	93.6497	0.268724	0.0134362
4	2	9.36	175	977.1	980	978.55	2.4	1.4	32.3	0.408	53	320	45	2	0.489078	7.21256	93.6497	0.268724	0.0134362
1	2	9.4	175	982.3	990	986.15	4.6	0.2	28	0.11	32	341.3	50	2	0.00258018	0.131695	98.0784	0.00526568	0.0115845
2	2	9.4	175	982.3	990	986.15	4.6	0.2	28	0.11	32	341.3	50	2	0.00258018	0.131695	98.0784	0.00526568	0.0160603
3	2	9.4	175	982.3	990	986.15	4.6	0.2	28	0.11	32	341.3	50	2	0.00258018	0.131695	98.0784	0.00526568	0.0152705
4	2	9.4	175	982.3	990	986.15	4.6	0.2	28	0.11	32	341.3	50	2	0.00258018	0.131695	98.0784	0.00526568	0.0184299
5	2	9.4	175	982.3	990	986.15	4.6	0.2	28	0.11	32	341.3	50	2	0.00258018	0.131695	98.0784	0.00526568	0.0203255
6	2	9.4	175	982.3	990	986.15	4.6	0.2	28	0.11	32	341.3	50	2	0.00258018	0.131695	98.0784	0.00526568	0.019325
7	2	9.4	175	982.3	990	986.15	4.6	0.2	28	0.11	32	341.3	50	2	0.00258018	0.131695	98.0784	0.00526568	0.0127429
8	2	9.4	175	982.3	990	986.15	4.6	0.2	28	0.11	32	341.3	50	2	0.00258018	0.131695	98.0784	0.00526568	0.00995213
1	2	7.18	175	974.2	979.1	976.65	4.6	3	30.1	0.502	38	182.7	30	2	0.389155	5.64057	93.5461	0.144667	0.368901
2	2	7.18	175	974.2	979.1	976.65	4.6	3	30.1	0.502	38	182.7	30	2	0.389155	5.64057	93.5461	0.144667	0.282101
3	2	7.18	175	974.2	979.1	976.65	4.6	3	30.1	0.502	38	182.7	30	2	0.389155	5.64057	93.5461	0.144667	0.313928
4	2	7.18	175	974.2	979.1	976.65	4.6	3	30.1	0.502	38	182.7	30	2	0.389155	5.64057	93.5461	0.144667	0.243041
5	2	7.18	175	974.2	979.1	976.65	4.6	3	30.1	0.502	38	182.7	30	2	0.389155	5.64057	93.5461	0.144667	0.280654
6	2	7.18	175	974.2	979.1	976.65	4.6	3	30.1	0.502	38	182.7	30	2	0.389155	5.64057	93.5461	0.144667	0.499102
7	2	7.18	175	974.2	979.1	976.65	4.6	3	30.1	0.502	38	182.7	30	2	0.389155	5.64057	93.5461	0.144667	0.716103
8	2	7.18	175	974.2	979.1	976.65	4.6	3	30.1	0.502	38	182.7	30	2	0.389155	5.64057	93.5461	0.144667	0.898383
9	2	7.18	175	974.2	979.1	976.65	4.6	3	30.1	0.502	38	182.7	30	2	0.389155	5.64057	93.5461	0.144667	0.503442
10	2	7.18	175	974.2	979.1	976.65	4.6	3	30.1	0.502	38	182.7	30	2	0.389155	5.64057	93.5461	0.144667	0.470168
11	2	7.18	175	974.2	979.1	976.65	4.6	3	30.1	0.502	38	182.7	30	2	0.389155	5.64057	93.5461	0.144667	0.374688
1	2	9.41	150	998.7	1005.2	1001.95	5.6	1.2	29.2	0.609	34	273	45	2	0.136053	4.66079	97.1637	0.388723	1.11952
2	2	9.41	150	998.7	1005.2	1001.95	5.6	1.2	29.2	0.609	34	273	45	2	0.136053	4.66079	97.1637	0.388723	1.6443
3	2	9.41	150	998.7	1005.2	1001.95	5.6	1.2	29.2	0.609	34	273	45	2	0.136053	4.66079	97.1637	0.388723	1.44994
4	2	9.41	150	998.7	1005.2	1001.95	5.6	1.2	29.2	0.609	34	273	45	2	0.136053	4.66079	97.1637	0.388723	1.34887
5	2	9.41	150	998.7	1005.2	1001.95	5.6	1.2	29.2	0.609	34	273	45	2	0.136053	4.66079	97.1637	0.388723	1.41884
6	2	9.41	150	998.7	1005.2	1001.95	5.6	1.2	29.2	0.609	34	273	45	2	0.136053	4.66079	97.1637	0.388723	0.932936
7	2	9.41	150	998.7	1005.2	1001.95	5.6	1.2	29.2	0.609	34	273	45	2	0.136053	4.66079	97.1637	0.388723	0.485904
8	2	9.41	150	998.7	1005.2	1001.95	5.6	1.2	29.2	0.609	34	273	45	2	0.136053	4.66079	97.1637	0.388723	0.412047
9	2	9.41	150	998.7	1005.2	1001.95	5.6	1.2	29.2	0.609	34	273	45	2	0.136053	4.66079	97.1637	0.388723	0.287655
10	2	9.41	150	998.7	1005.2	1001.95	5.6	1.2	29.2	0.609	34	273	45	2	0.136053	4.66079	97.1637	0.388723	0.178813
11	2	9.41	150	998.7	1005.2	1001.95	5.6	1.2	29.2	0.609	34	273	45	2	0.136053	4.66079	97.1637	0.388723	0.147715
12	2	9.41	150	998.7	1005.2	1001.95	5.6	1.2	29.2	0.609	34	273	45	2	0.136053	4.66079	97.1637	0.388723	0.248783
1	2	11.65	175	994.9	1002.2	998.55	6.8	6.4	30.3	0.803	30	240	45	2	0.296442	3.20792	91.5408	0.211744	0.442545
2	2	11.65	175	994.9	1002.2	998.55	6.8	6.4	30.3	0.803	30	240	45	2	0.296442	3.20792	91.5408	0.211744	0.28162
3	2	11.65	175	994.9	1002.2	998.55	6.8	6.4	30.3	0.803	30	240	45	2	0.595001	6.40103	91.4952	0.211744	0.105872
4	2	11.65	175	994.9	1002.2	998.55	6.8	6.4	30.3	0.803	30	240	45	2	0.296442	3.20792	91.5408	0.211744	0.398079
5	2	11.65	175	994.9	1002.2	998.55	6.8	6.4	30.3	0.803	30	240	45	2	0.595001	6.40103	91.4952	0.211744	0.290089
6	2	11.65	175	994.9	1002.2	998.55	6.8	6.4	30.3	0.803	30	240	45	2	0.296442	3.20792	91.5408	0.211744	0.897795
7	2	11.65	175	994.9	1002.2	998.55	6.8	6.4	30.3	0.803	30	240	45	2	0.595001	6.40103	91.4952	0.211744	0.499716
8	2	11.65	175	994.9	1002.2	998.55	6.8	6.4	30.3	0.803	30	240	45	2	0.296442	3.20792	91.5408	0.211744	0.885091
9	2	11.65	175	994.9	1002.2	998.55	6.8	6.4	30.3	0.803	30	240	45	2	0.595001	6.40103	91.4952	0.211744	0.815215
10	2	11.65	175	994.9	1002.2	998.55	6.8	6.4	30.3	0.803	30	240	45	2	0.296442	3.20792	91.5408	0.211744	1.52456
1	2	11.65	175	1004.4	1008.9	1006.65	3.9	2.6	29.7	1.492	26	300	53	2	0.223762	2.42142	91.5408	0.15983	0.334045
2	2	11.65	175	1004.4	1008.9	1006.65	3.9	2.6	29.7	1.492	26	300	53	2	0.223762	2.42142	91.5408	0.15983	0.212574
3	2	11.65	175	1004.4	1008.9	1006.65	3.9	2.6	29.7	1.492	26	300	53	2	0.449122	4.83166	91.4952	0.15983	0.079915
4	2	11.65	175	1004.4	1008.9	1006.65	3.9	2.6	29.7	1.492	26	300	53	2	0.223762	2.42142	91.5408	0.15983	0.30048
5	2	11.65	175	1004.4	1008.9	1006.65	3.9	2.6	29.7	1.492	26	300	53	2	0.449122	4.83166	91.4952	0.15983	0.218967
6	2	11.65	175	1004.4	1008.9	1006.65	3.9	2.6	29.7	1.492	26	300	53	2	0.223762	2.42142	91.5408	0.15983	0.677679
7	2	11.65	175	1004.4	1008.9	1006.65	3.9	2.6	29.7	1.492	26	300	53	2	0.449122	4.83166	91.4952	0.15983	0.377199
8	2	11.65	175	1004.4	1008.9	1006.65	3.9	2.6	29.7	1.492	26	300	53	2	0.223762	2.42142	91.5408	0.15983	0.668089
9	2	11.65	175	1004.4	1008.9	1006.65	3.9	2.6	29.7	1.492	26	300	53	2	0.449122	4.83166	91.4952	0.15983	0.615345
10	2	11.65	175	1004.4	1008.9	1006.65	3.9	2.6	29.7	1.492	26	300	53	2	0.223762	2.42142	91.5408	0.15983	1.15078
1	2	9.64	150	955.5	961.6	958.55	5.7	2.7	30.5	0.526	26	179.4	29	2	0.131665	4.58633	97.2093	0.274302	0.112464
2	2	9.64	150	955.5	961.6	958.55	5.7	2.7	30.5	0.526	26	179.4	29	2	0.131665	4.58633	97.2093	0.274302	0.0356593
3	2	9.64	150	955.5	961.6	958.55	5.7	2.7	30.5	0.526	26	179.4	29	2	0.131665	4.58633	97.2093	0.274302	0.0768046
4	2	9.64	150	955.5	961.6	958.55	5.7	2.7	30.5	0.526	26	179.4	29	2	0.131665	4.58633	97.2093	0.274302	0.137151
5	2	9.64	150	955.5	961.6	958.55	5.7	2.7	30.5	0.526	26	179.4	29	2	0.131665	4.58633	97.2093	0.274302	0.211213
6	2	9.64	150	955.5	961.6	958.55	5.7	2.7	30.5	0.526	26	179.4	29	2	0.131665	4.58633	97.2093	0.274302	0.183783
7	2	9.64	150	955.5	961.6	958.55	5.7	2.7	30.5	0.526	26	179.4	29	2	0.131665	4.58633	97.2093	0.274302	0.255101
8	2	9.64	150	955.5	961.6	958.55	5.7	2.7	30.5	0.526	26	179.4	29	2	0.131665	4.58633	97.2093	0.274302	0.156352
9	2	9.64	150	955.5	961.6	958.55	5.7	2.7	30.5	0.526	26	179.4	29	2	0.131665	4.58633	97.2093	0.274302	0.205727
10	2	9.64	150	955.5	961.6	958.55	5.7	2.7	30.5	0.526	26	179.4	29	2	0.131665	4.58633	97.2093	0.274302	0.249615
11	2	9.64	150	955.5	961.6	958.55	5.7	2.7	30.5	0.526	26	179.4	29	2	0.131665	4.58633	97.2093	0.274302	0.194755
1	2	9.99	150	1092.8	1097.3	1095.05	2.9	1.5	29.3	0.401	53	173.8	28	2	0.495252	6.32118	92.7344	0.243967	0.575762
2	2	9.99	150	1092.8	1097.3	1095.05	2.9	1.5	29.3	0.401	53	173.8	28	2	0.495252	6.32118	92.7344	0.243967	2.18594
3	2	9.99	150	1092.8	1097.3	1095.05	2.9	1.5	29.3	0.401	53	173.8	28	2	0.495252	6.32118	92.7344	0.243967	2.63972
4	2	9.99	150	1092.8	1097.3	1095.05	2.9	1.5	29.3	0.401	53	173.8	28	2	0.495252	6.32118	92.7344	0.243967	2.88857
5	2	9.99	150	1092.8	1097.3	1095.05	2.9	1.5	29.3	0.401	53	173.8	28	2	0.495252	6.32118	92.7344	0.243967	3.26427
6	2	9.99	150	1092.8	1097.3	1095.05	2.9	1.5	29.3	0.401	53	173.8	28	2	0.495252	6.32118	92.7344	0.243967	2.20058
7	2	9.99	150	1092.8	1097.3	1095.05	2.9	1.5	29.3	0.401	53	173.8	28	2	0.495252	6.32118	92.7344	0.243967	2.50798
8	2	9.99	150	1092.8	1097.3	1095.05	2.9	1.5	29.3	0.401	53	173.8	28	2	0.495252	6.32118	92.7344	0.243967	2.68119
9	2	9.99	150	1092.8	1097.3	1095.05	2.9	1.5	29.3	0.401	53	173.8	28	2	0.495252	6.32118	92.7344	0.243967	2.43479
10	2	9.99	150	1092.8	1097.3	1095.05	2.9	1.5	29.3	0.401	53	173.8	28	2	0.495252	6.32118	92.7344	0.243967	2.46894
11	2	9.99	150	1092.8	1097.3	1095.05	2.9	1.5	29.3	0.401	53	173.8	28	2	0.495252	6.32118	92.7344	0.243967	2.33232
1	2	9.83	125	859.4	864.6	862	3.9	1.8	30.4	0.326	23	277.2	46	2	0.849816	7.25119	89.5098	0.213522	0.542345
2	2	9.83	125	859.4	864.6	862	3.9	1.8	30.4	0.326	23	277.2	46	2	0.849816	7.25119	89.5098	0.213522	0.595725
3	2	9.83	125	859.4	864.6	862	3.9	1.8	30.4	0.326	23	277.2	46	2	0.849816	7.25119	89.5098	0.213522	0.54021
4	2	9.83	125	859.4	864.6	862	3.9	1.8	30.4	0.326	23	277.2	46	2	0.849816	7.25119	89.5098	0.213522	0.407826
5	2	9.83	125	859.4	864.6	862	3.9	1.8	30.4	0.326	23	277.2	46	2	0.849816	7.25119	89.5098	0.213522	0.0832734
1	2	9.41	150	928.5	936	932.25	6.3	4.8	30.8	0.434	25	120.12	19	2	0.0162746	3.35256	99.5169	0.542486	0.688957
2	2	9.41	150	928.5	936	932.25	6.3	4.8	30.8	0.434	25	120.12	19	2	0.0162746	3.35256	99.5169	0.542486	0.710656
3	2	9.41	150	928.5	936	932.25	6.3	4.8	30.8	0.434	25	120.12	19	2	0.0162746	3.35256	99.5169	0.542486	0.900527
4	2	9.41	150	928.5	936	932.25	6.3	4.8	30.8	0.434	25	120.12	19	2	0.0162746	3.35256	99.5169	0.542486	1.0253
5	2	9.41	150	928.5	936	932.25	6.3	4.8	30.8	0.434	25	120.12	19	2	0.0162746	3.35256	99.5169	0.542486	0.846278
6	2	9.41	150	928.5	936	932.25	6.3	4.8	30.8	0.434	25	120.12	19	2	0.0162746	3.35256	99.5169	0.542486	0.922226
1	2	9.41	150	942.4	945.5	943.95	2.4	0.9	28.6	0.283	27	181.68	29	2	0.00198979	0.409897	99.5169	0.0663264	0.0842345
2	2	9.41	150	942.4	945.5	943.95	2.4	0.9	28.6	0.283	27	181.68	29	2	0.00198979	0.409897	99.5169	0.0663264	0.0868876
3	2	9.41	150	942.4	945.5	943.95	2.4	0.9	28.6	0.283	27	181.68	29	2	0.00198979	0.409897	99.5169	0.0663264	0.110102
4	2	9.41	150	942.4	945.5	943.95	2.4	0.9	28.6	0.283	27	181.68	29	2	0.00198979	0.409897	99.5169	0.0663264	0.125357
5	2	9.41	150	942.4	945.5	943.95	2.4	0.9	28.6	0.283	27	181.68	29	2	0.00198979	0.409897	99.5169	0.0663264	0.103469
6	2	9.41	150	942.4	945.5	943.95	2.4	0.9	28.6	0.283	27	181.68	29	2	0.00198979	0.409897	99.5169	0.0663264	0.112755
1	2	10.95	150	1069.6	1073	1071.3	2.7	2.2	28.2	0.41	27	118.82	19	2	0.0642496	3.6301	98.2609	0.214165	1.5013
2	2	10.95	150	1069.6	1073	1071.3	2.7	2.2	28.2	0.41	27	118.82	19	2	0.0642496	3.6301	98.2609	0.214165	2.1031
3	2	10.95	150	1069.6	1073	1071.3	2.7	2.2	28.2	0.41	27	118.82	19	2	0.0642496	3.6301	98.2609	0.214165	2.1288
4	2	10.95	150	1069.6	1073	1071.3	2.7	2.2	28.2	0.41	27	118.82	19	2	0.0642496	3.6301	98.2609	0.214165	2.50573
5	2	10.95	150	1069.6	1073	1071.3	2.7	2.2	28.2	0.41	27	118.82	19	2	0.0642496	3.6301	98.2609	0.214165	2.59568
6	2	10.95	150	1069.6	1073	1071.3	2.7	2.2	28.2	0.41	27	118.82	19	2	0.0642496	3.6301	98.2609	0.214165	2.79057
7	2	10.95	150	1069.6	1073	1071.3	2.7	2.2	28.2	0.41	27	118.82	19	2	0.0642496	3.6301	98.2609	0.214165	2.6942
8	2	10.95	150	1069.6	1073	1071.3	2.7	2.2	28.2	0.41	27	118.82	19	2	0.0642496	3.6301	98.2609	0.214165	2.34511
9	2	10.95	150	1069.6	1073	1071.3	2.7	2.2	28.2	0.41	27	118.82	19	2	0.0642496	3.6301	98.2609	0.214165	2.1545
10	2	10.95	150	1069.6	1073	1071.3	2.7	2.2	28.2	0.41	27	118.82	19	2	0.0642496	3.6301	98.2609	0.214165	1.89108
11	2	10.95	150	1069.6	1073	1071.3	2.7	2.2	28.2	0.41	27	118.82	19	2	0.0642496	3.6301	98.2609	0.214165	1.81398
1	2	10.95	150	1084.2	1091.9	1088.05	4.2	3.3	28.8	0.505	27	95.86	15	2	0.118705	6.70683	98.2609	0.395683	2.77374
2	2	10.95	150	1084.2	1091.9	1088.05	4.2	3.3	28.8	0.505	27	95.86	15	2	0.118705	6.70683	98.2609	0.395683	3.88561
3	2	10.95	150	1084.2	1091.9	1088.05	4.2	3.3	28.8	0.505	27	95.86	15	2	0.118705	6.70683	98.2609	0.395683	3.93309
4	2	10.95	150	1084.2	1091.9	1088.05	4.2	3.3	28.8	0.505	27	95.86	15	2	0.118705	6.70683	98.2609	0.395683	4.6295
5	2	10.95	150	1084.2	1091.9	1088.05	4.2	3.3	28.8	0.505	27	95.86	15	2	0.118705	6.70683	98.2609	0.395683	4.79568
6	2	10.95	150	1084.2	1091.9	1088.05	4.2	3.3	28.8	0.505	27	95.86	15	2	0.118705	6.70683	98.2609	0.395683	5.15576
7	2	10.95	150	1084.2	1091.9	1088.05	4.2	3.3	28.8	0.505	27	95.86	15	2	0.118705	6.70683	98.2609	0.395683	4.9777
8	2	10.95	150	1084.2	1091.9	1088.05	4.2	3.3	28.8	0.505	27	95.86	15	2	0.118705	6.70683	98.2609	0.395683	4.33273
9	2	10.95	150	1084.2	1091.9	1088.05	4.2	3.3	28.8	0.505	27	95.86	15	2	0.118705	6.70683	98.2609	0.395683	3.98058
10	2	10.95	150	1084.2	1091.9	1088.05	4.2	3.3	28.8	0.505	27	95.86	15	2	0.118705	6.70683	98.2609	0.395683	3.49388
11	2	10.95	150	1084.2	1091.9	1088.05	4.2	3.3	28.8	0.505	27	95.86	15	2	0.118705	6.70683	98.2609	0.395683	3.35144
1	2	9.4	125	909.9	916	912.95	4.3	2.4	32.5	0.687	27	106.24	17	2	0.623375	11.8495	95.0022	0.542065	0.959456
2	2	9.4	125	909.9	916	912.95	4.3	2.4	32.5	0.687	27	106.24	17	2	0.623375	11.8495	95.0022	0.542065	0.439073
3	2	9.4	125	909.9	916	912.95	4.3	2.4	32.5	0.687	27	106.24	17	2	0.623375	11.8495	95.0022	0.542065	0.298136
4	2	9.4	125	909.9	916	912.95	4.3	2.4	32.5	0.687	27	106.24	17	2	0.623375	11.8495	95.0022	0.542065	0.135516
5	2	9.4	125	909.9	916	912.95	4.3	2.4	32.5	0.687	27	106.24	17	2	0.623375	11.8495	95.0022	0.542065	0.368604
6	2	9.4	125	909.9	916	912.95	4.3	2.4	32.5	0.687	27	106.24	17	2	0.623375	11.8495	95.0022	0.542065	1.26843
7	2	9.4	125	909.9	916	912.95	4.3	2.4	32.5	0.687	27	106.24	17	2	0.623375	11.8495	95.0022	0.542065	1.49068
8	2	9.4	125	909.9	916	912.95	4.3	2.4	32.5	0.687	27	106.24	17	2	0.623375	11.8495	95.0022	0.542065	1.20338
9	2	9.4	125	909.9	916	912.95	4.3	2.4	32.5	0.687	27	106.24	17	2	0.623375	11.8495	95.0022	0.542065	3.17108
10	2	9.4	125	909.9	916	912.95	4.3	2.4	32.5	0.687	27	106.24	17	2	0.623375	11.8495	95.0022	0.542065	3.4638
11	2	9.4	125	909.9	916	912.95	4.3	2.4	32.5	0.687	27	106.24	17	2	0.623375	11.8495	95.0022	0.542065	2.69406
1	2	9.4	125	926.4	931.5	928.95	3.9	1	31.3	0.381	23	141.38	23	2	0.144048	2.73816	95.0022	0.125259	0.221708
2	2	9.4	125	926.4	931.5	928.95	3.9	1	31.3	0.381	23	141.38	23	2	0.144048	2.73816	95.0022	0.125259	0.10146
3	2	9.4	125	926.4	931.5	928.95	3.9	1	31.3	0.381	23	141.38	23	2	0.144048	2.73816	95.0022	0.125259	0.0688924
4	2	9.4	125	926.4	931.5	928.95	3.9	1	31.3	0.381	23	141.38	23	2	0.144048	2.73816	95.0022	0.125259	0.0313147
5	2	9.4	125	926.4	931.5	928.95	3.9	1	31.3	0.381	23	141.38	23	2	0.144048	2.73816	95.0022	0.125259	0.0851761
6	2	9.4	125	926.4	931.5	928.95	3.9	1	31.3	0.381	23	141.38	23	2	0.144048	2.73816	95.0022	0.125259	0.293106
7	2	9.4	125	926.4	931.5	928.95	3.9	1	31.3	0.381	23	141.38	23	2	0.144048	2.73816	95.0022	0.125259	0.344462
8	2	9.4	125	926.4	931.5	928.95	3.9	1	31.3	0.381	23	141.38	23	2	0.144048	2.73816	95.0022	0.125259	0.278075
9	2	9.4	125	926.4	931.5	928.95	3.9	1	31.3	0.381	23	141.38	23	2	0.144048	2.73816	95.0022	0.125259	0.732765
10	2	9.4	125	926.4	931.5	928.95	3.9	1	31.3	0.381	23	141.38	23	2	0.144048	2.73816	95.0022	0.125259	0.800404
11	2	9.4	125	926.4	931.5	928.95	3.9	1	31.3	0.381	23	141.38	23	2	0.144048	2.73816	95.0022	0.125259	0.622537
1	2	9.4	125	944.7	955.6	950.15	7.5	2.3	31.7	0.312	22	142.68	23	2	0.271309	5.15723	95.0022	0.235921	0.41758
2	2	9.4	125	944.7	955.6	950.15	7.5	2.3	31.7	0.312	22	142.68	23	2	0.271309	5.15723	95.0022	0.235921	0.191096
3	2	9.4	125	944.7	955.6	950.15	7.5	2.3	31.7	0.312	22	142.68	23	2	0.271309	5.15723	95.0022	0.235921	0.129756
4	2	9.4	125	944.7	955.6	950.15	7.5	2.3	31.7	0.312	22	142.68	23	2	0.271309	5.15723	95.0022	0.235921	0.0589802
5	2	9.4	125	944.7	955.6	950.15	7.5	2.3	31.7	0.312	22	142.68	23	2	0.271309	5.15723	95.0022	0.235921	0.160426
6	2	9.4	125	944.7	955.6	950.15	7.5	2.3	31.7	0.312	22	142.68	23	2	0.271309	5.15723	95.0022	0.235921	0.552054
7	2	9.4	125	944.7	955.6	950.15	7.5	2.3	31.7	0.312	22	142.68	23	2	0.271309	5.15723	95.0022	0.235921	0.648782
8	2	9.4	125	944.7	955.6	950.15	7.5	2.3	31.7	0.312	22	142.68	23	2	0.271309	5.15723	95.0022	0.235921	0.523744
9	2	9.4	125	944.7	955.6	950.15	7.5	2.3	31.7	0.312	22	142.68	23	2	0.271309	5.15723	95.0022	0.235921	1.38014
10	2	9.4	125	944.7	955.6	950.15	7.5	2.3	31.7	0.312	22	142.68	23	2	0.271309	5.15723	95.0022	0.235921	1.50753
11	2	9.4	125	944.7	955.6	950.15	7.5	2.3	31.7	0.312	22	142.68	23	2	0.271309	5.15723	95.0022	0.235921	1.17253
1	2	9.41	150	902.9	916.2	909.55	11.3	5.7	31.3	0.491	24	150.88	23	2	1.19342	23.7181	95.2094	0.884014	5.2422
2	2	9.41	150	902.9	916.2	909.55	11.3	5.7	31.3	0.491	24	150.88	23	2	1.19342	23.7181	95.2094	0.884014	1.99787
3	2	9.41	150	902.9	916.2	909.55	11.3	5.7	31.3	0.491	24	150.88	23	2	1.19342	23.7181	95.2094	0.884014	0.733732
4	2	9.41	150	902.9	916.2	909.55	11.3	5.7	31.3	0.491	24	150.88	23	2	1.19342	23.7181	95.2094	0.884014	1.0343
5	2	9.41	150	902.9	916.2	909.55	11.3	5.7	31.3	0.491	24	150.88	23	2	1.19342	23.7181	95.2094	0.884014	0.521568
1	2	11.77	150	1120.3	1124.1	1122.2	3.1	0.3	28	0.199	32	179.92	29	2	0.0177046	0.38301	95.5817	0.0147539	0.0246389
2	2	11.77	150	1120.3	1124.1	1122.2	3.1	0.3	28	0.199	32	179.92	29	2	0.0177046	0.38301	95.5817	0.0147539	0.0647694
3	2	11.77	150	1120.3	1124.1	1122.2	3.1	0.3	28	0.199	32	179.92	29	2	0.0177046	0.38301	95.5817	0.0147539	0.0621137
4	2	11.77	150	1120.3	1124.1	1122.2	3.1	0.3	28	0.199	32	179.92	29	2	0.0177046	0.38301	95.5817	0.0147539	0.0839494
5	2	11.77	150	1120.3	1124.1	1122.2	3.1	0.3	28	0.199	32	179.92	29	2	0.0177046	0.38301	95.5817	0.0147539	0.109621
6	2	11.77	150	1120.3	1124.1	1122.2	3.1	0.3	28	0.199	32	179.92	29	2	0.0177046	0.38301	95.5817	0.0147539	0.0835068
7	2	11.77	150	1120.3	1124.1	1122.2	3.1	0.3	28	0.199	32	179.92	29	2	0.0177046	0.38301	95.5817	0.0147539	0.0584253
8	2	11.77	150	1120.3	1124.1	1122.2	3.1	0.3	28	0.199	32	179.92	29	2	0.0177046	0.38301	95.5817	0.0147539	0.0122457
1	2	11.77	150	1134.4	1140.6	1137.5	5.1	3.8	29.5	0.514	32	145.82	23	2	0.579241	12.5309	95.5817	0.482701	0.80611
2	2	11.77	150	1134.4	1140.6	1137.5	5.1	3.8	29.5	0.514	32	145.82	23	2	0.579241	12.5309	95.5817	0.482701	2.11906
3	2	11.77	150	1134.4	1140.6	1137.5	5.1	3.8	29.5	0.514	32	145.82	23	2	0.579241	12.5309	95.5817	0.482701	2.03217
4	2	11.77	150	1134.4	1140.6	1137.5	5.1	3.8	29.5	0.514	32	145.82	23	2	0.579241	12.5309	95.5817	0.482701	2.74657
5	2	11.77	150	1134.4	1140.6	1137.5	5.1	3.8	29.5	0.514	32	145.82	23	2	0.579241	12.5309	95.5817	0.482701	3.58647
6	2	11.77	150	1134.4	1140.6	1137.5	5.1	3.8	29.5	0.514	32	145.82	23	2	0.579241	12.5309	95.5817	0.482701	2.73209
7	2	11.77	150	1134.4	1140.6	1137.5	5.1	3.8	29.5	0.514	32	145.82	23	2	0.579241	12.5309	95.5817	0.482701	1.91149
8	2	11.77	150	1134.4	1140.6	1137.5	5.1	3.8	29.5	0.514	32	145.82	23	2	0.579241	12.5309	95.5817	0.482701	0.400642
1	2	11.61	175	997.2	1013.7	1005.45	16.5	13.8	31.2	0.629	44	146.52	32	2	3.03238	35.1517	92.0585	0.997495	1.69574
2	2	11.61	175	997.2	1013.7	1005.45	16.5	13.8	31.2	0.629	44	146.52	32	2	3.03238	35.1517	92.0585	0.997495	1.15709
3	2	11.61	175	997.2	1013.7	1005.45	16.5	13.8	31.2	0.629	44	146.52	32	2	3.03238	35.1517	92.0585	0.997495	1.55609
4	2	11.61	175	997.2	1013.7	1005.45	16.5	13.8	31.2	0.629	44	146.52	32	2	3.03238	35.1517	92.0585	0.997495	4.72813
5	2	11.61	175	997.2	1013.7	1005.45	16.5	13.8	31.2	0.629	44	146.52	32	2	3.03238	35.1517	92.0585	0.997495	9.42633
6	2	11.61	175	997.2	1013.7	1005.45	16.5	13.8	31.2	0.629	44	146.52	32	2	3.03238	35.1517	92.0585	0.997495	10.5236
7	2	11.61	175	997.2	1013.7	1005.45	16.5	13.8	31.2	0.629	44	146.52	32	2	3.03238	35.1517	92.0585	0.997495	6.44382
8	2	11.61	175	997.2	1013.7	1005.45	16.5	13.8	31.2	0.629	44	146.52	32	2	3.03238	35.1517	92.0585	0.997495	5.26677
9	2	11.61	175	997.2	1013.7	1005.45	16.5	13.8	31.2	0.629	44	146.52	32	2	3.03238	35.1517	92.0585	0.997495	2.78301
10	2	11.61	175	997.2	1013.7	1005.45	16.5	13.8	31.2	0.629	44	146.52	32	2	3.03238	35.1517	92.0585	0.997495	1.59599
11	2	11.61	175	997.2	1013.7	1005.45	16.5	13.8	31.2	0.629	44	146.52	32	2	3.03238	35.1517	92.0585	0.997495	1.04737
12	2	11.61	175	997.2	1013.7	1005.45	16.5	13.8	31.2	0.629	44	146.52	32	2	3.03238	35.1517	92.0585	0.997495	0.408973
1	2	9.99	175	942.7	950.2	946.45	5.4	0.8	29	0.43	27	281.54	47	2	0.447856	4.06989	90.0867	0.0933033	0.125959
2	2	9.99	175	942.7	950.2	946.45	5.4	0.8	29	0.43	27	281.54	47	2	0.447856	4.06989	90.0867	0.0933033	0.0709105
1	2	7.18	175	927.6	941	934.3	13	10	30.8	1.02	23	286.28	47	2	3.90337	11.2453	74.2329	0.528196	0.126767
1	2	10.79	175	1050.8	1058	1054.4	4.1	1.8	28.7	0.232	32	258.96	37	2	0.0705154	1.2784	94.7724	0.0303946	0.0796338
2	2	10.79	175	1050.8	1058	1054.4	4.1	1.8	28.7	0.232	32	258.96	37	2	0.0705154	1.2784	94.7724	0.0303946	0.04468
3	2	10.79	175	1050.8	1058	1054.4	4.1	1.8	28.7	0.232	32	258.96	37	2	0.0705154	1.2784	94.7724	0.0303946	0.0458958
4	2	10.79	175	1050.8	1058	1054.4	4.1	1.8	28.7	0.232	32	258.96	37	2	0.0705154	1.2784	94.7724	0.0303946	0.0258354
5	2	10.79	175	1050.8	1058	1054.4	4.1	1.8	28.7	0.232	32	258.96	37	2	0.0705154	1.2784	94.7724	0.0303946	0.010942
1	2	10.24	150	1113.1	1118.4	1115.75	4.6	2.7	28.5	0.461	25	226.7	37	2	2.80837	19.2525	87.2699	0.688326	8.99642
2	2	10.24	150	1113.1	1118.4	1115.75	4.6	2.7	28.5	0.461	25	226.7	37	2	2.80837	19.2525	87.2699	0.688326	10.9926
3	2	10.24	150	1113.1	1118.4	1115.75	4.6	2.7	28.5	0.461	25	226.7	37	2	2.80837	19.2525	87.2699	0.688326	10.0289
4	2	10.24	150	1113.1	1118.4	1115.75	4.6	2.7	28.5	0.461	25	226.7	37	2	2.80837	19.2525	87.2699	0.688326	10.6622
5	2	10.24	150	1113.1	1118.4	1115.75	4.6	2.7	28.5	0.461	25	226.7	37	2	2.80837	19.2525	87.2699	0.688326	11.2197
6	2	10.24	150	1113.1	1118.4	1115.75	4.6	2.7	28.5	0.461	25	226.7	37	2	2.80837	19.2525	87.2699	0.688326	10.5933
7	2	10.24	150	1113.1	1118.4	1115.75	4.6	2.7	28.5	0.461	25	226.7	37	2	2.80837	19.2525	87.2699	0.688326	10.8274
8	2	10.24	150	1113.1	1118.4	1115.75	4.6	2.7	28.5	0.461	25	226.7	37	2	2.80837	19.2525	87.2699	0.688326	5.45154
9	2	10.24	150	1113.1	1118.4	1115.75	4.6	2.7	28.5	0.461	25	226.7	37	2	2.80837	19.2525	87.2699	0.688326	4.35022
10	2	10.24	150	1113.1	1118.4	1115.75	4.6	2.7	28.5	0.461	25	226.7	37	2	2.80837	19.2525	87.2699	0.688326	5.1418
11	2	10.24	150	1113.1	1118.4	1115.75	4.6	2.7	28.5	0.461	25	226.7	37	2	2.80837	19.2525	87.2699	0.688326	5.34141
1	2	10.24	150	1128.6	1132.3	1130.45	1.3	0.5	26.7	0.173	28	281.05	37	2	0.195167	1.33794	87.2699	0.047835	0.625203
2	2	10.24	150	1128.6	1132.3	1130.45	1.3	0.5	26.7	0.173	28	281.05	37	2	0.195167	1.33794	87.2699	0.047835	0.763925
3	2	10.24	150	1128.6	1132.3	1130.45	1.3	0.5	26.7	0.173	28	281.05	37	2	0.195167	1.33794	87.2699	0.047835	0.696956
4	2	10.24	150	1128.6	1132.3	1130.45	1.3	0.5	26.7	0.173	28	281.05	37	2	0.195167	1.33794	87.2699	0.047835	0.740964
5	2	10.24	150	1128.6	1132.3	1130.45	1.3	0.5	26.7	0.173	28	281.05	37	2	0.195167	1.33794	87.2699	0.047835	0.77971
6	2	10.24	150	1128.6	1132.3	1130.45	1.3	0.5	26.7	0.173	28	281.05	37	2	0.195167	1.33794	87.2699	0.047835	0.73618
7	2	10.24	150	1128.6	1132.3	1130.45	1.3	0.5	26.7	0.173	28	281.05	37	2	0.195167	1.33794	87.2699	0.047835	0.752444
8	2	10.24	150	1128.6	1132.3	1130.45	1.3	0.5	26.7	0.173	28	281.05	37	2	0.195167	1.33794	87.2699	0.047835	0.378853
9	2	10.24	150	1128.6	1132.3	1130.45	1.3	0.5	26.7	0.173	28	281.05	37	2	0.195167	1.33794	87.2699	0.047835	0.302317
10	2	10.24	150	1128.6	1132.3	1130.45	1.3	0.5	26.7	0.173	28	281.05	37	2	0.195167	1.33794	87.2699	0.047835	0.357327
11	2	10.24	150	1128.6	1132.3	1130.45	1.3	0.5	26.7	0.173	28	281.05	37	2	0.195167	1.33794	87.2699	0.047835	0.371199
1	2	10.24	150	1134	1137.4	1135.7	2.3	1.3	28.1	0.367	42	226.15	37	2	1.07646	7.37958	87.2699	0.263839	3.44838
2	2	10.24	150	1134	1137.4	1135.7	2.3	1.3	28.1	0.367	42	226.15	37	2	1.07646	7.37958	87.2699	0.263839	4.21351
3	2	10.24	150	1134	1137.4	1135.7	2.3	1.3	28.1	0.367	42	226.15	37	2	1.07646	7.37958	87.2699	0.263839	3.84413
4	2	10.24	150	1134	1137.4	1135.7	2.3	1.3	28.1	0.367	42	226.15	37	2	1.07646	7.37958	87.2699	0.263839	4.08687
5	2	10.24	150	1134	1137.4	1135.7	2.3	1.3	28.1	0.367	42	226.15	37	2	1.07646	7.37958	87.2699	0.263839	4.30058
6	2	10.24	150	1134	1137.4	1135.7	2.3	1.3	28.1	0.367	42	226.15	37	2	1.07646	7.37958	87.2699	0.263839	4.06048
7	2	10.24	150	1134	1137.4	1135.7	2.3	1.3	28.1	0.367	42	226.15	37	2	1.07646	7.37958	87.2699	0.263839	4.15019
8	2	10.24	150	1134	1137.4	1135.7	2.3	1.3	28.1	0.367	42	226.15	37	2	1.07646	7.37958	87.2699	0.263839	2.0896
9	2	10.24	150	1134	1137.4	1135.7	2.3	1.3	28.1	0.367	42	226.15	37	2	1.07646	7.37958	87.2699	0.263839	1.66746
10	2	10.24	150	1134	1137.4	1135.7	2.3	1.3	28.1	0.367	42	226.15	37	2	1.07646	7.37958	87.2699	0.263839	1.97088
11	2	10.24	150	1134	1137.4	1135.7	2.3	1.3	28.1	0.367	42	226.15	37	2	1.07646	7.37958	87.2699	0.263839	2.04739
1	2	8.87	175	985	993.5	989.25	6.9	0.8	29.5	0.21	45	446.02	70	2	0.108571	2.03429	94.9333	0.047619	0.39
2	2	8.87	175	985	993.5	989.25	6.9	0.8	29.5	0.21	45	446.02	70	2	0.108571	2.03429	94.9333	0.047619	0.337143
3	2	8.87	175	985	993.5	989.25	6.9	0.8	29.5	0.21	45	446.02	70	2	0.108571	2.03429	94.9333	0.047619	0.326667
4	2	8.87	175	985	993.5	989.25	6.9	0.8	29.5	0.21	45	446.02	70	2	0.108571	2.03429	94.9333	0.047619	0.260476
5	2	8.87	175	985	993.5	989.25	6.9	0.8	29.5	0.21	45	446.02	70	2	0.108571	2.03429	94.9333	0.047619	0.140952
6	2	8.87	175	985	993.5	989.25	6.9	0.8	29.5	0.21	45	446.02	70	2	0.108571	2.03429	94.9333	0.047619	0.0604762
7	2	8.87	175	985	993.5	989.25	6.9	0.8	29.5	0.21	45	446.02	70	2	0.108571	2.03429	94.9333	0.047619	0.047619
8	2	8.87	175	985	993.5	989.25	6.9	0.8	29.5	0.21	45	446.02	70	2	0.108571	2.03429	94.9333	0.047619	0.0209524
9	2	8.87	175	985	993.5	989.25	6.9	0.8	29.5	0.21	45	446.02	70	2	0.108571	2.03429	94.9333	0.047619	0.00809524
1	2	9.83	125	847	854.4	850.7	5.7	1.8	29.7	0.342	20	215.76	36	2	0.372191	5.90713	94.0728	0.159738	0.146959
2	2	9.83	125	847	854.4	850.7	5.7	1.8	29.7	0.342	20	215.76	36	2	0.372191	5.90713	94.0728	0.159738	0.137375
3	2	9.83	125	847	854.4	850.7	5.7	1.8	29.7	0.342	20	215.76	36	2	0.372191	5.90713	94.0728	0.159738	0.258776
4	2	9.83	125	847	854.4	850.7	5.7	1.8	29.7	0.342	20	215.76	36	2	0.372191	5.90713	94.0728	0.159738	0.247595
5	2	9.83	125	847	854.4	850.7	5.7	1.8	29.7	0.342	20	215.76	36	2	0.372191	5.90713	94.0728	0.159738	0.198076
6	2	9.83	125	847	854.4	850.7	5.7	1.8	29.7	0.342	20	215.76	36	2	0.372191	5.90713	94.0728	0.159738	0.119804
7	2	9.83	125	847	854.4	850.7	5.7	1.8	29.7	0.342	20	215.76	36	2	0.372191	5.90713	94.0728	0.159738	0.0447268
8	2	9.83	125	847	854.4	850.7	5.7	1.8	29.7	0.342	20	215.76	36	2	0.372191	5.90713	94.0728	0.159738	0.0127791
1	2	12.18	150	946.7	956	951.35	8.3	5.8	31.6	0.75	27	76.8	12	2	1.81707	35.4191	95.1202	0.913098	1.47922
2	2	12.18	150	946.7	956	951.35	8.3	5.8	31.6	0.75	27	76.8	12	2	1.81707	35.4191	95.1202	0.913098	3.04062
3	2	12.18	150	946.7	956	951.35	8.3	5.8	31.6	0.75	27	76.8	12	2	1.81707	35.4191	95.1202	0.913098	1.99055
4	2	12.18	150	946.7	956	951.35	8.3	5.8	31.6	0.75	27	76.8	12	2	1.81707	35.4191	95.1202	0.913098	3.33281
5	2	12.18	150	946.7	956	951.35	8.3	5.8	31.6	0.75	27	76.8	12	2	1.81707	35.4191	95.1202	0.913098	2.48363
6	2	12.18	150	946.7	956	951.35	8.3	5.8	31.6	0.75	27	76.8	12	2	1.81707	35.4191	95.1202	0.913098	5.19553
7	2	12.18	150	946.7	956	951.35	8.3	5.8	31.6	0.75	27	76.8	12	2	1.81707	35.4191	95.1202	0.913098	3.03149
8	2	12.18	150	946.7	956	951.35	8.3	5.8	31.6	0.75	27	76.8	12	2	1.81707	35.4191	95.1202	0.913098	3.49717
9	2	12.18	150	946.7	956	951.35	8.3	5.8	31.6	0.75	27	76.8	12	2	1.81707	35.4191	95.1202	0.913098	1.12311
1	2	12.18	150	967.3	970.7	969	3.4	1.8	31.5	0.23	48	77.28	12	2	0.172935	3.37092	95.1202	0.0869018	0.140781
2	2	12.18	150	967.3	970.7	969	3.4	1.8	31.5	0.23	48	77.28	12	2	0.172935	3.37092	95.1202	0.0869018	0.289383
3	2	12.18	150	967.3	970.7	969	3.4	1.8	31.5	0.23	48	77.28	12	2	0.172935	3.37092	95.1202	0.0869018	0.189446
4	2	12.18	150	967.3	970.7	969	3.4	1.8	31.5	0.23	48	77.28	12	2	0.172935	3.37092	95.1202	0.0869018	0.317191
5	2	12.18	150	967.3	970.7	969	3.4	1.8	31.5	0.23	48	77.28	12	2	0.172935	3.37092	95.1202	0.0869018	0.236373
6	2	12.18	150	967.3	970.7	969	3.4	1.8	31.5	0.23	48	77.28	12	2	0.172935	3.37092	95.1202	0.0869018	0.494471
7	2	12.18	150	967.3	970.7	969	3.4	1.8	31.5	0.23	48	77.28	12	2	0.172935	3.37092	95.1202	0.0869018	0.288514
8	2	12.18	150	967.3	970.7	969	3.4	1.8	31.5	0.23	48	77.28	12	2	0.172935	3.37092	95.1202	0.0869018	0.332834
9	2	12.18	150	967.3	970.7	969	3.4	1.8	31.5	0.23	48	77.28	12	2	0.172935	3.37092	95.1202	0.0869018	0.106889
1	2	8.6	125	947.5	951.6	949.55	2.9	1	29	0.458	20	175.68	29	2	0.121235	5.98768	98.0154	0.22451	0.990088
2	2	8.6	125	947.5	951.6	949.55	2.9	1	29	0.458	20	175.68	29	2	0.121235	5.98768	98.0154	0.22451	0.747618
3	2	8.6	125	947.5	951.6	949.55	2.9	1	29	0.458	20	175.68	29	2	0.121235	5.98768	98.0154	0.22451	0.945186
4	2	8.6	125	947.5	951.6	949.55	2.9	1	29	0.458	20	175.68	29	2	0.121235	5.98768	98.0154	0.22451	0.828441
5	2	8.6	125	947.5	951.6	949.55	2.9	1	29	0.458	20	175.68	29	2	0.121235	5.98768	98.0154	0.22451	0.538824
6	2	8.6	125	947.5	951.6	949.55	2.9	1	29	0.458	20	175.68	29	2	0.121235	5.98768	98.0154	0.22451	0.321049
7	2	8.6	125	947.5	951.6	949.55	2.9	1	29	0.458	20	175.68	29	2	0.121235	5.98768	98.0154	0.22451	0.33901
8	2	8.6	125	947.5	951.6	949.55	2.9	1	29	0.458	20	175.68	29	2	0.121235	5.98768	98.0154	0.22451	0.240225
9	2	8.6	125	947.5	951.6	949.55	2.9	1	29	0.458	20	175.68	29	2	0.121235	5.98768	98.0154	0.22451	0.244716
10	2	8.6	125	947.5	951.6	949.55	2.9	1	29	0.458	20	175.68	29	2	0.121235	5.98768	98.0154	0.22451	0.253696
1	2	8.6	125	963.7	971.6	967.65	5.4	1.4	28.7	0.361	19	176.16	29	2	0.133782	6.60736	98.0154	0.247745	1.09256
2	2	8.6	125	963.7	971.6	967.65	5.4	1.4	28.7	0.361	19	176.16	29	2	0.133782	6.60736	98.0154	0.247745	0.824991
3	2	8.6	125	963.7	971.6	967.65	5.4	1.4	28.7	0.361	19	176.16	29	2	0.133782	6.60736	98.0154	0.247745	1.04301
4	2	8.6	125	963.7	971.6	967.65	5.4	1.4	28.7	0.361	19	176.16	29	2	0.133782	6.60736	98.0154	0.247745	0.914179
5	2	8.6	125	963.7	971.6	967.65	5.4	1.4	28.7	0.361	19	176.16	29	2	0.133782	6.60736	98.0154	0.247745	0.594588
6	2	8.6	125	963.7	971.6	967.65	5.4	1.4	28.7	0.361	19	176.16	29	2	0.133782	6.60736	98.0154	0.247745	0.354275
7	2	8.6	125	963.7	971.6	967.65	5.4	1.4	28.7	0.361	19	176.16	29	2	0.133782	6.60736	98.0154	0.247745	0.374095
8	2	8.6	125	963.7	971.6	967.65	5.4	1.4	28.7	0.361	19	176.16	29	2	0.133782	6.60736	98.0154	0.247745	0.265087
9	2	8.6	125	963.7	971.6	967.65	5.4	1.4	28.7	0.361	19	176.16	29	2	0.133782	6.60736	98.0154	0.247745	0.270042
10	2	8.6	125	963.7	971.6	967.65	5.4	1.4	28.7	0.361	19	176.16	29	2	0.133782	6.60736	98.0154	0.247745	0.279952
1	2	8.6	125	978.4	981.2	979.8	1.3	0.5	28	0.291	20	141.12	23	2	0.0385147	1.9022	98.0154	0.0713235	0.314537
2	2	8.6	125	978.4	981.2	979.8	1.3	0.5	28	0.291	20	141.12	23	2	0.0385147	1.9022	98.0154	0.0713235	0.237507
3	2	8.6	125	978.4	981.2	979.8	1.3	0.5	28	0.291	20	141.12	23	2	0.0385147	1.9022	98.0154	0.0713235	0.300272
4	2	8.6	125	978.4	981.2	979.8	1.3	0.5	28	0.291	20	141.12	23	2	0.0385147	1.9022	98.0154	0.0713235	0.263184
5	2	8.6	125	978.4	981.2	979.8	1.3	0.5	28	0.291	20	141.12	23	2	0.0385147	1.9022	98.0154	0.0713235	0.171176
6	2	8.6	125	978.4	981.2	979.8	1.3	0.5	28	0.291	20	141.12	23	2	0.0385147	1.9022	98.0154	0.0713235	0.101993
7	2	8.6	125	978.4	981.2	979.8	1.3	0.5	28	0.291	20	141.12	23	2	0.0385147	1.9022	98.0154	0.0713235	0.107699
8	2	8.6	125	978.4	981.2	979.8	1.3	0.5	28	0.291	20	141.12	23	2	0.0385147	1.9022	98.0154	0.0713235	0.0763162
9	2	8.6	125	978.4	981.2	979.8	1.3	0.5	28	0.291	20	141.12	23	2	0.0385147	1.9022	98.0154	0.0713235	0.0777426
10	2	8.6	125	978.4	981.2	979.8	1.3	0.5	28	0.291	20	141.12	23	2	0.0385147	1.9022	98.0154	0.0713235	0.0805956
1	2	11.23	175	1010.8	1024.4	1017.6	13.6	8.6	28.8	0.209	35	106.92	17	2	0.852352	11.1638	92.9066	0.286987	0.723207
2	2	11.23	175	1010.8	1024.4	1017.6	13.6	8.6	28.8	0.209	35	106.92	17	2	0.852352	11.1638	92.9066	0.286987	0.416131
3	2	11.23	175	1010.8	1024.4	1017.6	13.6	8.6	28.8	0.209	35	106.92	17	2	0.852352	11.1638	92.9066	0.286987	0.0114795
1	2	8.6	125	932.9	939.4	936.15	3.9	0.3	31.3	0.402	25	163.92	27	2	0.0017052	1.50228	99.8866	0.0852598	0.341892
2	2	8.6	125	932.9	939.4	936.15	3.9	0.3	31.3	0.402	25	163.92	27	2	0.0017052	1.50228	99.8866	0.0852598	0.280505
3	2	8.6	125	932.9	939.4	936.15	3.9	0.3	31.3	0.402	25	163.92	27	2	0.0017052	1.50228	99.8866	0.0852598	0.34445
4	2	8.6	125	932.9	939.4	936.15	3.9	0.3	31.3	0.402	25	163.92	27	2	0.0017052	1.50228	99.8866	0.0852598	0.364059
5	2	8.6	125	932.9	939.4	936.15	3.9	0.3	31.3	0.402	25	163.92	27	2	0.0017052	1.50228	99.8866	0.0852598	0.402426
6	2	8.6	125	932.9	939.4	936.15	3.9	0.3	31.3	0.402	25	163.92	27	2	0.0017052	1.50228	99.8866	0.0852598	0.41351
7	2	8.6	125	932.9	939.4	936.15	3.9	0.3	31.3	0.402	25	163.92	27	2	0.0017052	1.50228	99.8866	0.0852598	0.380259
8	2	8.6	125	932.9	939.4	936.15	3.9	0.3	31.3	0.402	25	163.92	27	2	0.0017052	1.50228	99.8866	0.0852598	0.265158
9	2	8.6	125	932.9	939.4	936.15	3.9	0.3	31.3	0.402	25	163.92	27	2	0.0017052	1.50228	99.8866	0.0852598	0.249811
1	2	8.6	125	959.5	965.3	962.4	3.5	0.6	29	0.267	27	164.4	27	2	0.00226511	1.99556	99.8866	0.113256	0.454155
2	2	8.6	125	959.5	965.3	962.4	3.5	0.6	29	0.267	27	164.4	27	2	0.00226511	1.99556	99.8866	0.113256	0.372611
3	2	8.6	125	959.5	965.3	962.4	3.5	0.6	29	0.267	27	164.4	27	2	0.00226511	1.99556	99.8866	0.113256	0.457552
4	2	8.6	125	959.5	965.3	962.4	3.5	0.6	29	0.267	27	164.4	27	2	0.00226511	1.99556	99.8866	0.113256	0.483601
5	2	8.6	125	959.5	965.3	962.4	3.5	0.6	29	0.267	27	164.4	27	2	0.00226511	1.99556	99.8866	0.113256	0.534566
6	2	8.6	125	959.5	965.3	962.4	3.5	0.6	29	0.267	27	164.4	27	2	0.00226511	1.99556	99.8866	0.113256	0.54929
7	2	8.6	125	959.5	965.3	962.4	3.5	0.6	29	0.267	27	164.4	27	2	0.00226511	1.99556	99.8866	0.113256	0.50512
8	2	8.6	125	959.5	965.3	962.4	3.5	0.6	29	0.267	27	164.4	27	2	0.00226511	1.99556	99.8866	0.113256	0.352225
9	2	8.6	125	959.5	965.3	962.4	3.5	0.6	29	0.267	27	164.4	27	2	0.00226511	1.99556	99.8866	0.113256	0.331839
1	2	8.6	125	968.5	973.9	971.2	2.5	0.7	30.7	0.271	53	164.4	27	2	0.00268222	2.36304	99.8866	0.134111	0.537785
2	2	8.6	125	968.5	973.9	971.2	2.5	0.7	30.7	0.271	53	164.4	27	2	0.00268222	2.36304	99.8866	0.134111	0.441225
3	2	8.6	125	968.5	973.9	971.2	2.5	0.7	30.7	0.271	53	164.4	27	2	0.00268222	2.36304	99.8866	0.134111	0.541808
4	2	8.6	125	968.5	973.9	971.2	2.5	0.7	30.7	0.271	53	164.4	27	2	0.00268222	2.36304	99.8866	0.134111	0.572654
5	2	8.6	125	968.5	973.9	971.2	2.5	0.7	30.7	0.271	53	164.4	27	2	0.00268222	2.36304	99.8866	0.134111	0.633004
6	2	8.6	125	968.5	973.9	971.2	2.5	0.7	30.7	0.271	53	164.4	27	2	0.00268222	2.36304	99.8866	0.134111	0.650438
7	2	8.6	125	968.5	973.9	971.2	2.5	0.7	30.7	0.271	53	164.4	27	2	0.00268222	2.36304	99.8866	0.134111	0.598135
8	2	8.6	125	968.5	973.9	971.2	2.5	0.7	30.7	0.271	53	164.4	27	2	0.00268222	2.36304	99.8866	0.134111	0.417085
9	2	8.6	125	968.5	973.9	971.2	2.5	0.7	30.7	0.271	53	164.4	27	2	0.00268222	2.36304	99.8866	0.134111	0.392945
1	2	8.91	125	916	921.2	918.6	4.4	2.6	30.2	0.353	27	129.16	20	2	0.332928	6.70018	95.2663	0.41616	0.774058
2	2	8.91	125	916	921.2	918.6	4.4	2.6	30.2	0.353	27	129.16	20	2	0.332928	6.70018	95.2663	0.41616	0.611756
3	2	8.91	125	916	921.2	918.6	4.4	2.6	30.2	0.353	27	129.16	20	2	0.332928	6.70018	95.2663	0.41616	0.557655
4	2	8.91	125	916	921.2	918.6	4.4	2.6	30.2	0.353	27	129.16	20	2	0.332928	6.70018	95.2663	0.41616	0.299635
5	2	8.91	125	916	921.2	918.6	4.4	2.6	30.2	0.353	27	129.16	20	2	0.332928	6.70018	95.2663	0.41616	0.345413
6	2	8.91	125	916	921.2	918.6	4.4	2.6	30.2	0.353	27	129.16	20	2	0.332928	6.70018	95.2663	0.41616	0.407837
7	2	8.91	125	916	921.2	918.6	4.4	2.6	30.2	0.353	27	129.16	20	2	0.332928	6.70018	95.2663	0.41616	0.428645
8	2	8.91	125	916	921.2	918.6	4.4	2.6	30.2	0.353	27	129.16	20	2	0.332928	6.70018	95.2663	0.41616	0.341251
9	2	8.91	125	916	921.2	918.6	4.4	2.6	30.2	0.353	27	129.16	20	2	0.332928	6.70018	95.2663	0.41616	0.436968
10	2	8.91	125	916	921.2	918.6	4.4	2.6	30.2	0.353	27	129.16	20	2	0.332928	6.70018	95.2663	0.41616	0.424484
11	2	8.91	125	916	921.2	918.6	4.4	2.6	30.2	0.353	27	129.16	20	2	0.332928	6.70018	95.2663	0.41616	0.670018
12	2	8.91	125	916	921.2	918.6	4.4	2.6	30.2	0.353	27	129.16	20	2	0.332928	6.70018	95.2663	0.41616	0.603432
1	2	8.91	125	934.7	942.6	938.65	7.1	3.7	29	0.348	27	130.68	21	2	0.467072	9.39982	95.2663	0.58384	1.08594
2	2	8.91	125	934.7	942.6	938.65	7.1	3.7	29	0.348	27	130.68	21	2	0.467072	9.39982	95.2663	0.58384	0.858244
3	2	8.91	125	934.7	942.6	938.65	7.1	3.7	29	0.348	27	130.68	21	2	0.467072	9.39982	95.2663	0.58384	0.782345
4	2	8.91	125	934.7	942.6	938.65	7.1	3.7	29	0.348	27	130.68	21	2	0.467072	9.39982	95.2663	0.58384	0.420365
5	2	8.91	125	934.7	942.6	938.65	7.1	3.7	29	0.348	27	130.68	21	2	0.467072	9.39982	95.2663	0.58384	0.484587
6	2	8.91	125	934.7	942.6	938.65	7.1	3.7	29	0.348	27	130.68	21	2	0.467072	9.39982	95.2663	0.58384	0.572163
7	2	8.91	125	934.7	942.6	938.65	7.1	3.7	29	0.348	27	130.68	21	2	0.467072	9.39982	95.2663	0.58384	0.601355
8	2	8.91	125	934.7	942.6	938.65	7.1	3.7	29	0.348	27	130.68	21	2	0.467072	9.39982	95.2663	0.58384	0.478749
9	2	8.91	125	934.7	942.6	938.65	7.1	3.7	29	0.348	27	130.68	21	2	0.467072	9.39982	95.2663	0.58384	0.613032
10	2	8.91	125	934.7	942.6	938.65	7.1	3.7	29	0.348	27	130.68	21	2	0.467072	9.39982	95.2663	0.58384	0.595516
11	2	8.91	125	934.7	942.6	938.65	7.1	3.7	29	0.348	27	130.68	21	2	0.467072	9.39982	95.2663	0.58384	0.939982
12	2	8.91	125	934.7	942.6	938.65	7.1	3.7	29	0.348	27	130.68	21	2	0.467072	9.39982	95.2663	0.58384	0.846568
1	2	10.19	175	977	981.8	979.4	3.4	0.4	31.2	0.172	31	473	70	2	0.0278225	0.568577	95.3349	0.0178349	0.100589
2	2	10.19	175	977	981.8	979.4	3.4	0.4	31.2	0.172	31	473	70	2	0.0278225	0.568577	95.3349	0.0178349	0.143749
3	2	10.19	175	977	981.8	979.4	3.4	0.4	31.2	0.172	31	473	70	2	0.0278225	0.568577	95.3349	0.0178349	0.130373
4	2	10.19	175	977	981.8	979.4	3.4	0.4	31.2	0.172	31	473	70	2	0.0278225	0.568577	95.3349	0.0178349	0.124844
5	2	10.19	175	977	981.8	979.4	3.4	0.4	31.2	0.172	31	473	70	2	0.0278225	0.568577	95.3349	0.0178349	0.0984488
6	2	10.19	175	977	981.8	979.4	3.4	0.4	31.2	0.172	31	473	70	2	0.0278225	0.568577	95.3349	0.0178349	0.118602
7	2	10.19	175	977	981.8	979.4	3.4	0.4	31.2	0.172	31	473	70	2	0.0278225	0.568577	95.3349	0.0178349	0.0777603
8	2	10.19	175	977	981.8	979.4	3.4	0.4	31.2	0.172	31	473	70	2	0.0278225	0.568577	95.3349	0.0178349	0.0986271
9	2	10.19	175	977	981.8	979.4	3.4	0.4	31.2	0.172	31	473	70	2	0.0278225	0.568577	95.3349	0.0178349	0.0536831
10	2	10.19	175	977	981.8	979.4	3.4	0.4	31.2	0.172	31	473	70	2	0.0278225	0.568577	95.3349	0.0178349	0.0447657
1	2	10.13	150	985.3	992.6	988.95	5.2	3.4	30.7	0.556	28	141.36	23	2	0.381468	12.2014	96.9683	0.560983	0.577812
2	2	10.13	150	985.3	992.6	988.95	5.2	3.4	30.7	0.556	28	141.36	23	2	0.381468	12.2014	96.9683	0.560983	1.77271
3	2	10.13	150	985.3	992.6	988.95	5.2	3.4	30.7	0.556	28	141.36	23	2	0.381468	12.2014	96.9683	0.560983	2.78247
4	2	10.13	150	985.3	992.6	988.95	5.2	3.4	30.7	0.556	28	141.36	23	2	0.381468	12.2014	96.9683	0.560983	3.08541
5	2	10.13	150	985.3	992.6	988.95	5.2	3.4	30.7	0.556	28	141.36	23	2	0.381468	12.2014	96.9683	0.560983	2.01393
7	2	10.13	150	985.3	992.6	988.95	5.2	3.4	30.7	0.556	28	141.36	23	2	0.381468	12.2014	96.9683	0.560983	2.99004
8	2	10.13	150	985.3	992.6	988.95	5.2	3.4	30.7	0.556	28	141.36	23	2	0.381468	12.2014	96.9683	0.560983	4.37567
9	2	10.13	150	985.3	992.6	988.95	5.2	3.4	30.7	0.556	28	141.36	23	2	0.381468	12.2014	96.9683	0.560983	4.29713
10	2	10.13	150	985.3	992.6	988.95	5.2	3.4	30.7	0.556	28	141.36	23	2	0.381468	12.2014	96.9683	0.560983	2.26076
11	2	10.13	150	985.3	992.6	988.95	5.2	3.4	30.7	0.556	28	141.36	23	2	0.381468	12.2014	96.9683	0.560983	1.77271
12	2	10.13	150	985.3	992.6	988.95	5.2	3.4	30.7	0.556	28	141.36	23	2	0.381468	12.2014	96.9683	0.560983	1.11636
1	2	12.18	150	921.2	928.6	924.9	5.1	0.9	28.2	0.205	23	175.92	29	2	0.0803144	3.80304	97.9318	0.14873	0.178476
2	2	12.18	150	921.2	928.6	924.9	5.1	0.9	28.2	0.205	23	175.92	29	2	0.0803144	3.80304	97.9318	0.14873	0.547328
3	2	12.18	150	921.2	928.6	924.9	5.1	0.9	28.2	0.205	23	175.92	29	2	0.0803144	3.80304	97.9318	0.14873	0.514607
4	2	12.18	150	921.2	928.6	924.9	5.1	0.9	28.2	0.205	23	175.92	29	2	0.0803144	3.80304	97.9318	0.14873	0.852225
5	2	12.18	150	921.2	928.6	924.9	5.1	0.9	28.2	0.205	23	175.92	29	2	0.0803144	3.80304	97.9318	0.14873	0.907255
6	2	12.18	150	921.2	928.6	924.9	5.1	0.9	28.2	0.205	23	175.92	29	2	0.0803144	3.80304	97.9318	0.14873	0.843301
7	2	12.18	150	921.2	928.6	924.9	5.1	0.9	28.2	0.205	23	175.92	29	2	0.0803144	3.80304	97.9318	0.14873	0.67821
8	2	12.18	150	921.2	928.6	924.9	5.1	0.9	28.2	0.205	23	175.92	29	2	0.0803144	3.80304	97.9318	0.14873	0.523531
9	2	12.18	150	921.2	928.6	924.9	5.1	0.9	28.2	0.205	23	175.92	29	2	0.0803144	3.80304	97.9318	0.14873	0.804631
10	2	12.18	150	921.2	928.6	924.9	5.1	0.9	28.2	0.205	23	175.92	29	2	0.0803144	3.80304	97.9318	0.14873	0.67821
11	2	12.18	150	921.2	928.6	924.9	5.1	0.9	28.2	0.205	23	175.92	29	2	0.0803144	3.80304	97.9318	0.14873	0.620206
12	2	12.18	150	921.2	928.6	924.9	5.1	0.9	28.2	0.205	23	175.92	29	2	0.0803144	3.80304	97.9318	0.14873	0.51312
1	2	12.18	150	938.9	943.4	941.15	3.5	2.2	30.7	0.48	19	175.92	29	2	0.459686	21.767	97.9318	0.85127	1.02152
2	2	12.18	150	938.9	943.4	941.15	3.5	2.2	30.7	0.48	19	175.92	29	2	0.459686	21.767	97.9318	0.85127	3.13267
3	2	12.18	150	938.9	943.4	941.15	3.5	2.2	30.7	0.48	19	175.92	29	2	0.459686	21.767	97.9318	0.85127	2.94539
4	2	12.18	150	938.9	943.4	941.15	3.5	2.2	30.7	0.48	19	175.92	29	2	0.459686	21.767	97.9318	0.85127	4.87778
5	2	12.18	150	938.9	943.4	941.15	3.5	2.2	30.7	0.48	19	175.92	29	2	0.459686	21.767	97.9318	0.85127	5.19274
6	2	12.18	150	938.9	943.4	941.15	3.5	2.2	30.7	0.48	19	175.92	29	2	0.459686	21.767	97.9318	0.85127	4.8267
7	2	12.18	150	938.9	943.4	941.15	3.5	2.2	30.7	0.48	19	175.92	29	2	0.459686	21.767	97.9318	0.85127	3.88179
8	2	12.18	150	938.9	943.4	941.15	3.5	2.2	30.7	0.48	19	175.92	29	2	0.459686	21.767	97.9318	0.85127	2.99647
9	2	12.18	150	938.9	943.4	941.15	3.5	2.2	30.7	0.48	19	175.92	29	2	0.459686	21.767	97.9318	0.85127	4.60537
10	2	12.18	150	938.9	943.4	941.15	3.5	2.2	30.7	0.48	19	175.92	29	2	0.459686	21.767	97.9318	0.85127	3.88179
11	2	12.18	150	938.9	943.4	941.15	3.5	2.2	30.7	0.48	19	175.92	29	2	0.459686	21.767	97.9318	0.85127	3.54979
12	2	12.18	150	938.9	943.4	941.15	3.5	2.2	30.7	0.48	19	175.92	29	2	0.459686	21.767	97.9318	0.85127	2.93688
1	2	9.1	125	914.9	920.4	917.65	4.1	1.1	27.4	0.104	23	107.88	17	2	0.0587312	0.740852	92.6548	0.0839017	0.0134243
2	2	9.1	125	914.9	920.4	917.65	4.1	1.1	27.4	0.104	23	107.88	17	2	0.0587312	0.740852	92.6548	0.0839017	0.0671214
3	2	9.1	125	914.9	920.4	917.65	4.1	1.1	27.4	0.104	23	107.88	17	2	0.0587312	0.740852	92.6548	0.0839017	0.107394
4	2	9.1	125	914.9	920.4	917.65	4.1	1.1	27.4	0.104	23	107.88	17	2	0.0587312	0.740852	92.6548	0.0839017	0.0771896
5	2	9.1	125	914.9	920.4	917.65	4.1	1.1	27.4	0.104	23	107.88	17	2	0.0587312	0.740852	92.6548	0.0839017	0.0805457
6	2	9.1	125	914.9	920.4	917.65	4.1	1.1	27.4	0.104	23	107.88	17	2	0.0587312	0.740852	92.6548	0.0839017	0.152701
7	2	9.1	125	914.9	920.4	917.65	4.1	1.1	27.4	0.104	23	107.88	17	2	0.0587312	0.740852	92.6548	0.0839017	0.177872
8	2	9.1	125	914.9	920.4	917.65	4.1	1.1	27.4	0.104	23	107.88	17	2	0.0587312	0.740852	92.6548	0.0839017	0.144311
9	2	9.1	125	914.9	920.4	917.65	4.1	1.1	27.4	0.104	23	107.88	17	2	0.0587312	0.740852	92.6548	0.0839017	0.103199
10	2	9.1	125	914.9	920.4	917.65	4.1	1.1	27.4	0.104	23	107.88	17	2	0.0587312	0.740852	92.6548	0.0839017	0.0948089
11	2	9.1	125	914.9	920.4	917.65	4.1	1.1	27.4	0.104	23	107.88	17	2	0.0587312	0.740852	92.6548	0.0839017	0.120818
1	2	9.1	125	940.5	946.6	943.55	4	2	29.5	0.304	19	177.96	29	2	0.312138	3.9374	92.6548	0.445911	0.0713458
2	2	9.1	125	940.5	946.6	943.55	4	2	29.5	0.304	19	177.96	29	2	0.312138	3.9374	92.6548	0.445911	0.356729
3	2	9.1	125	940.5	946.6	943.55	4	2	29.5	0.304	19	177.96	29	2	0.312138	3.9374	92.6548	0.445911	0.570766
4	2	9.1	125	940.5	946.6	943.55	4	2	29.5	0.304	19	177.96	29	2	0.312138	3.9374	92.6548	0.445911	0.410238
5	2	9.1	125	940.5	946.6	943.55	4	2	29.5	0.304	19	177.96	29	2	0.312138	3.9374	92.6548	0.445911	0.428075
6	2	9.1	125	940.5	946.6	943.55	4	2	29.5	0.304	19	177.96	29	2	0.312138	3.9374	92.6548	0.445911	0.811558
7	2	9.1	125	940.5	946.6	943.55	4	2	29.5	0.304	19	177.96	29	2	0.312138	3.9374	92.6548	0.445911	0.945332
8	2	9.1	125	940.5	946.6	943.55	4	2	29.5	0.304	19	177.96	29	2	0.312138	3.9374	92.6548	0.445911	0.766967
9	2	9.1	125	940.5	946.6	943.55	4	2	29.5	0.304	19	177.96	29	2	0.312138	3.9374	92.6548	0.445911	0.548471
10	2	9.1	125	940.5	946.6	943.55	4	2	29.5	0.304	19	177.96	29	2	0.312138	3.9374	92.6548	0.445911	0.50388
11	2	9.1	125	940.5	946.6	943.55	4	2	29.5	0.304	19	177.96	29	2	0.312138	3.9374	92.6548	0.445911	0.642112
1	2	9.54	175	990	998	994	6.9	3.6	31.5	0.518	27	282.06	47	2	4.10836	53.0043	92.8066	0.709562	2.24222
2	2	9.54	175	990	998	994	6.9	3.6	31.5	0.518	27	282.06	47	2	4.10836	53.0043	92.8066	0.709562	2.597
3	2	9.54	175	990	998	994	6.9	3.6	31.5	0.518	27	282.06	47	2	4.10836	53.0043	92.8066	0.709562	2.37703
4	2	9.54	175	990	998	994	6.9	3.6	31.5	0.518	27	282.06	47	2	4.10836	53.0043	92.8066	0.709562	2.29189
5	2	9.54	175	990	998	994	6.9	3.6	31.5	0.518	27	282.06	47	2	4.10836	53.0043	92.8066	0.709562	1.71714
6	2	9.54	175	990	998	994	6.9	3.6	31.5	0.518	27	282.06	47	2	4.10836	53.0043	92.8066	0.709562	1.87324
1	2	10.65	150	997	1006.3	1001.65	7.9	3.2	30.5	0.388	32	106.92	17	2	2.18	17.5	88.9228	1	1.16
1	2	9.54	175	981.7	988.5	985.1	4.4	1.9	31.5	1.007	35	223.74	37	2	0.358028	5.0605	93.3925	0.111884	0.0883881
2	2	9.54	175	981.7	988.5	985.1	4.4	1.9	31.5	1.007	35	223.74	37	2	0.358028	5.0605	93.3925	0.111884	0.14433
3	2	9.54	175	981.7	988.5	985.1	4.4	1.9	31.5	1.007	35	223.74	37	2	0.358028	5.0605	93.3925	0.111884	0.295373
4	2	9.54	175	981.7	988.5	985.1	4.4	1.9	31.5	1.007	35	223.74	37	2	0.358028	5.0605	93.3925	0.111884	0.215935
5	2	9.54	175	981.7	988.5	985.1	4.4	1.9	31.5	1.007	35	223.74	37	2	0.358028	5.0605	93.3925	0.111884	0.154399
6	2	9.54	175	981.7	988.5	985.1	4.4	1.9	31.5	1.007	35	223.74	37	2	0.358028	5.0605	93.3925	0.111884	0.140973
7	2	9.54	175	981.7	988.5	985.1	4.4	1.9	31.5	1.007	35	223.74	37	2	0.358028	5.0605	93.3925	0.111884	0.100695
1	2	8.77	150	972.7	978	975.35	4.8	2.6	30.5	0.588	0	0	0	2	0.653774	11.3281	94.5437	0.396226	1.05
2	2	8.77	150	972.7	978	975.35	4.8	2.6	30.5	0.588	0	0	0	2	0.653774	11.3281	94.5437	0.396226	1.17283
3	2	8.77	150	972.7	978	975.35	4.8	2.6	30.5	0.588	0	0	0	2	0.653774	11.3281	94.5437	0.396226	1.10943
4	2	8.77	150	972.7	978	975.35	4.8	2.6	30.5	0.588	0	0	0	2	0.653774	11.3281	94.5437	0.396226	0.416038
5	2	8.77	150	972.7	978	975.35	4.8	2.6	30.5	0.588	0	0	0	2	0.653774	11.3281	94.5437	0.396226	0.578491
6	2	8.77	150	972.7	978	975.35	4.8	2.6	30.5	0.588	0	0	0	2	0.653774	11.3281	94.5437	0.396226	0.443774
7	2	8.77	150	972.7	978	975.35	4.8	2.6	30.5	0.588	0	0	0	2	0.653774	11.3281	94.5437	0.396226	0.114906
1	2	10.02	125	964.4	971.1	967.75	6.3	3.1	31.8	0.862	32	183.7	29	2	0.104807	3.3741	96.9874	0.338086	0.23328
2	2	10.02	125	964.4	971.1	967.75	6.3	3.1	31.8	0.862	32	183.7	29	2	0.104807	3.3741	96.9874	0.338086	0.676173
3	2	10.02	125	964.4	971.1	967.75	6.3	3.1	31.8	0.862	32	183.7	29	2	0.104807	3.3741	96.9874	0.338086	0.622079
4	2	10.02	125	964.4	971.1	967.75	6.3	3.1	31.8	0.862	32	183.7	29	2	0.104807	3.3741	96.9874	0.338086	0.327944
5	2	10.02	125	964.4	971.1	967.75	6.3	3.1	31.8	0.862	32	183.7	29	2	0.104807	3.3741	96.9874	0.338086	0.304278
6	2	10.02	125	964.4	971.1	967.75	6.3	3.1	31.8	0.862	32	183.7	29	2	0.104807	3.3741	96.9874	0.338086	0.277231
7	2	10.02	125	964.4	971.1	967.75	6.3	3.1	31.8	0.862	32	183.7	29	2	0.104807	3.3741	96.9874	0.338086	0.23328
8	2	10.02	125	964.4	971.1	967.75	6.3	3.1	31.8	0.862	32	183.7	29	2	0.104807	3.3741	96.9874	0.338086	0.202852
9	2	10.02	125	964.4	971.1	967.75	6.3	3.1	31.8	0.862	32	183.7	29	2	0.104807	3.3741	96.9874	0.338086	0.311039
10	2	10.02	125	964.4	971.1	967.75	6.3	3.1	31.8	0.862	32	183.7	29	2	0.104807	3.3741	96.9874	0.338086	0.324563
11	2	10.02	125	964.4	971.1	967.75	6.3	3.1	31.8	0.862	32	183.7	29	2	0.104807	3.3741	96.9874	0.338086	0.206233
1	2	10.17	150	910.1	917.3	913.7	6.1	3.9	31.6	0.959	30	141.42	23	2	0.045652	1.11847	96.0784	0.57065	0.627715
2	2	10.17	150	910.1	917.3	913.7	6.1	3.9	31.6	0.959	30	141.42	23	2	0.045652	1.11847	96.0784	0.57065	0.673368
3	2	10.17	150	910.1	917.3	913.7	6.1	3.9	31.6	0.959	30	141.42	23	2	0.045652	1.11847	96.0784	0.57065	1.17554
4	2	10.17	150	910.1	917.3	913.7	6.1	3.9	31.6	0.959	30	141.42	23	2	0.045652	1.11847	96.0784	0.57065	1.43804
5	2	10.17	150	910.1	917.3	913.7	6.1	3.9	31.6	0.959	30	141.42	23	2	0.045652	1.11847	96.0784	0.57065	1.30108
6	2	10.17	150	910.1	917.3	913.7	6.1	3.9	31.6	0.959	30	141.42	23	2	0.045652	1.11847	96.0784	0.57065	1.23831
7	2	10.17	150	910.1	917.3	913.7	6.1	3.9	31.6	0.959	30	141.42	23	2	0.045652	1.11847	96.0784	0.57065	0.935867
8	2	10.17	150	910.1	917.3	913.7	6.1	3.9	31.6	0.959	30	141.42	23	2	0.045652	1.11847	96.0784	0.57065	1.13559
9	2	10.17	150	910.1	917.3	913.7	6.1	3.9	31.6	0.959	30	141.42	23	2	0.045652	1.11847	96.0784	0.57065	1.39809
1	2	10.17	150	924	927.3	925.65	1.6	0.3	26.3	0.065	31	176.7	29	2	0.000238019	0.00583146	96.0784	0.00297524	0.00327276
2	2	10.17	150	924	927.3	925.65	1.6	0.3	26.3	0.065	31	176.7	29	2	0.000238019	0.00583146	96.0784	0.00297524	0.00351078
3	2	10.17	150	924	927.3	925.65	1.6	0.3	26.3	0.065	31	176.7	29	2	0.000238019	0.00583146	96.0784	0.00297524	0.00612899
4	2	10.17	150	924	927.3	925.65	1.6	0.3	26.3	0.065	31	176.7	29	2	0.000238019	0.00583146	96.0784	0.00297524	0.0074976
5	2	10.17	150	924	927.3	925.65	1.6	0.3	26.3	0.065	31	176.7	29	2	0.000238019	0.00583146	96.0784	0.00297524	0.00678354
6	2	10.17	150	924	927.3	925.65	1.6	0.3	26.3	0.065	31	176.7	29	2	0.000238019	0.00583146	96.0784	0.00297524	0.00645626
7	2	10.17	150	924	927.3	925.65	1.6	0.3	26.3	0.065	31	176.7	29	2	0.000238019	0.00583146	96.0784	0.00297524	0.00487939
8	2	10.17	150	924	927.3	925.65	1.6	0.3	26.3	0.065	31	176.7	29	2	0.000238019	0.00583146	96.0784	0.00297524	0.00592072
9	2	10.17	150	924	927.3	925.65	1.6	0.3	26.3	0.065	31	176.7	29	2	0.000238019	0.00583146	96.0784	0.00297524	0.00728933
1	2	8.91	106	911.3	921.7	916.5	6	0.6	31.4	0.387	28	175.92	29	2	0.0656177	1.71832	96.3217	0.0721073	0.116814
2	2	8.91	106	911.3	921.7	916.5	6	0.6	31.4	0.387	28	175.92	29	2	0.0656177	1.71832	96.3217	0.0721073	0.152146
3	2	8.91	106	911.3	921.7	916.5	6	0.6	31.4	0.387	28	175.92	29	2	0.0656177	1.71832	96.3217	0.0721073	0.180989
4	2	8.91	106	911.3	921.7	916.5	6	0.6	31.4	0.387	28	175.92	29	2	0.0656177	1.71832	96.3217	0.0721073	0.193248
5	2	8.91	106	911.3	921.7	916.5	6	0.6	31.4	0.387	28	175.92	29	2	0.0656177	1.71832	96.3217	0.0721073	0.30934
6	2	8.91	106	911.3	921.7	916.5	6	0.6	31.4	0.387	28	175.92	29	2	0.0656177	1.71832	96.3217	0.0721073	0.28194
7	2	8.91	106	911.3	921.7	916.5	6	0.6	31.4	0.387	28	175.92	29	2	0.0656177	1.71832	96.3217	0.0721073	0.380727
8	2	8.91	106	911.3	921.7	916.5	6	0.6	31.4	0.387	28	175.92	29	2	0.0656177	1.71832	96.3217	0.0721073	0.198295
9	2	8.91	106	911.3	921.7	916.5	6	0.6	31.4	0.387	28	175.92	29	2	0.0656177	1.71832	96.3217	0.0721073	0.211996
10	2	8.91	106	911.3	921.7	916.5	6	0.6	31.4	0.387	28	175.92	29	2	0.0656177	1.71832	96.3217	0.0721073	0.193248
11	2	8.91	106	911.3	921.7	916.5	6	0.6	31.4	0.387	28	175.92	29	2	0.0656177	1.71832	96.3217	0.0721073	0.188921
12	2	8.91	106	911.3	921.7	916.5	6	0.6	31.4	0.387	28	175.92	29	2	0.0656177	1.71832	96.3217	0.0721073	0.16801
1	2	8.91	106	929.8	932.9	931.35	2.3	1	32.1	0.581	24	175.92	29	2	0.164185	4.29949	96.3217	0.180424	0.292286
2	2	8.91	106	929.8	932.9	931.35	2.3	1	32.1	0.581	24	175.92	29	2	0.164185	4.29949	96.3217	0.180424	0.380694
3	2	8.91	106	929.8	932.9	931.35	2.3	1	32.1	0.581	24	175.92	29	2	0.164185	4.29949	96.3217	0.180424	0.452863
4	2	8.91	106	929.8	932.9	931.35	2.3	1	32.1	0.581	24	175.92	29	2	0.164185	4.29949	96.3217	0.180424	0.483535
5	2	8.91	106	929.8	932.9	931.35	2.3	1	32.1	0.581	24	175.92	29	2	0.164185	4.29949	96.3217	0.180424	0.774017
6	2	8.91	106	929.8	932.9	931.35	2.3	1	32.1	0.581	24	175.92	29	2	0.164185	4.29949	96.3217	0.180424	0.705456
7	2	8.91	106	929.8	932.9	931.35	2.3	1	32.1	0.581	24	175.92	29	2	0.164185	4.29949	96.3217	0.180424	0.952636
8	2	8.91	106	929.8	932.9	931.35	2.3	1	32.1	0.581	24	175.92	29	2	0.164185	4.29949	96.3217	0.180424	0.496165
9	2	8.91	106	929.8	932.9	931.35	2.3	1	32.1	0.581	24	175.92	29	2	0.164185	4.29949	96.3217	0.180424	0.530445
10	2	8.91	106	929.8	932.9	931.35	2.3	1	32.1	0.581	24	175.92	29	2	0.164185	4.29949	96.3217	0.180424	0.483535
11	2	8.91	106	929.8	932.9	931.35	2.3	1	32.1	0.581	24	175.92	29	2	0.164185	4.29949	96.3217	0.180424	0.47271
12	2	8.91	106	929.8	932.9	931.35	2.3	1	32.1	0.581	24	175.92	29	2	0.164185	4.29949	96.3217	0.180424	0.420387
1	2	11.23	175	997	1010.8	1003.9	13.2	10.1	31.7	0.934	34	176.7	29	2	1.34761	23.559	94.5893	0.691081	1.97649
2	2	11.23	175	997	1010.8	1003.9	13.2	10.1	31.7	0.934	34	176.7	29	2	1.34761	23.559	94.5893	0.691081	1.46509
3	2	11.23	175	997	1010.8	1003.9	13.2	10.1	31.7	0.934	34	176.7	29	2	1.34761	23.559	94.5893	0.691081	1.49965
4	2	11.23	175	997	1010.8	1003.9	13.2	10.1	31.7	0.934	34	176.7	29	2	1.34761	23.559	94.5893	0.691081	1.67242
5	2	11.23	175	997	1010.8	1003.9	13.2	10.1	31.7	0.934	34	176.7	29	2	1.34761	23.559	94.5893	0.691081	1.05044
6	2	11.23	175	997	1010.8	1003.9	13.2	10.1	31.7	0.934	34	176.7	29	2	1.34761	23.559	94.5893	0.691081	0.725636
7	2	11.23	175	997	1010.8	1003.9	13.2	10.1	31.7	0.934	34	176.7	29	2	1.34761	23.559	94.5893	0.691081	0.794744
1	2	11.25	125	1004.1	1010.1	1007.1	4.8	2.8	31.2	0.988	27	123.38	19	2	0	0	0	0.408874	4.49761
2	2	11.25	125	1004.1	1010.1	1007.1	4.8	2.8	31.2	0.988	27	123.38	19	2	0	0	0	0.408874	3.12789
3	2	11.25	125	1004.1	1010.1	1007.1	4.8	2.8	31.2	0.988	27	123.38	19	2	0	0	0	0.408874	3.24646
4	2	11.25	125	1004.1	1010.1	1007.1	4.8	2.8	31.2	0.988	27	123.38	19	2	0	0	0	0.408874	2.91527
5	2	11.25	125	1004.1	1010.1	1007.1	4.8	2.8	31.2	0.988	27	123.38	19	2	0	0	0	0.408874	2.30605
6	2	11.25	125	1004.1	1010.1	1007.1	4.8	2.8	31.2	0.988	27	123.38	19	2	0	0	0	0.408874	2.22836
7	2	11.25	125	1004.1	1010.1	1007.1	4.8	2.8	31.2	0.988	27	123.38	19	2	0	0	0	0.408874	2.89892
8	2	11.25	125	1004.1	1010.1	1007.1	4.8	2.8	31.2	0.988	27	123.38	19	2	0	0	0	0.408874	3.44681
9	2	11.25	125	1004.1	1010.1	1007.1	4.8	2.8	31.2	0.988	27	123.38	19	2	0	0	0	0.408874	2.82123
10	2	11.25	125	1004.1	1010.1	1007.1	4.8	2.8	31.2	0.988	27	123.38	19	2	0	0	0	0.408874	2.18748
11	2	11.25	125	1004.1	1010.1	1007.1	4.8	2.8	31.2	0.988	27	123.38	19	2	0	0	0	0.408874	2.00757
12	2	11.25	125	1004.1	1010.1	1007.1	4.8	2.8	31.2	0.988	27	123.38	19	2	0	0	0	0.408874	2.81714
1	2	9.86	175	955.6	961.4	958.5	4.9	3.1	30.2	0.627	35	282.98	47	2	1.41005	30.4084	95.5684	0.658904	1.53525
2	2	9.86	175	955.6	961.4	958.5	4.9	3.1	30.2	0.627	35	282.98	47	2	1.41005	30.4084	95.5684	0.658904	1.34416
3	2	9.86	175	955.6	961.4	958.5	4.9	3.1	30.2	0.627	35	282.98	47	2	1.41005	30.4084	95.5684	0.658904	0.929054
4	2	9.86	175	955.6	961.4	958.5	4.9	3.1	30.2	0.627	35	282.98	47	2	1.41005	30.4084	95.5684	0.658904	0.810452
5	2	9.86	175	955.6	961.4	958.5	4.9	3.1	30.2	0.627	35	282.98	47	2	1.41005	30.4084	95.5684	0.658904	0.527123
6	2	9.86	175	955.6	961.4	958.5	4.9	3.1	30.2	0.627	35	282.98	47	2	1.41005	30.4084	95.5684	0.658904	0.263561
7	2	9.86	175	955.6	961.4	958.5	4.9	3.1	30.2	0.627	35	282.98	47	2	1.41005	30.4084	95.5684	0.658904	0.362397
8	2	9.86	175	955.6	961.4	958.5	4.9	3.1	30.2	0.627	35	282.98	47	2	1.41005	30.4084	95.5684	0.658904	0.362397
1	2	6.64	106	973.9	977.5	975.7	2.6	1	29.4	0.615	39	660	90	2	0.0158944	1.09608	98.5706	0.0635777	0.410076
2	2	6.64	106	973.9	977.5	975.7	2.6	1	29.4	0.615	39	660	90	2	0.0158944	1.09608	98.5706	0.0635777	0.317889
3	2	6.64	106	973.9	977.5	975.7	2.6	1	29.4	0.615	39	660	90	2	0.0158944	1.09608	98.5706	0.0635777	0.470475
4	2	6.64	106	973.9	977.5	975.7	2.6	1	29.4	0.615	39	660	90	2	0.0158944	1.09608	98.5706	0.0635777	0.357307
5	2	6.64	106	973.9	977.5	975.7	2.6	1	29.4	0.615	39	660	90	2	0.0158944	1.09608	98.5706	0.0635777	0.266391
6	2	6.64	106	973.9	977.5	975.7	2.6	1	29.4	0.615	39	660	90	2	0.0158944	1.09608	98.5706	0.0635777	0.177382
7	2	6.64	106	973.9	977.5	975.7	2.6	1	29.4	0.615	39	660	90	2	0.0158944	1.09608	98.5706	0.0635777	0.281649
8	2	6.64	106	973.9	977.5	975.7	2.6	1	29.4	0.615	39	660	90	2	0.0158944	1.09608	98.5706	0.0635777	0.242867
9	2	6.64	106	973.9	977.5	975.7	2.6	1	29.4	0.615	39	660	90	2	0.0158944	1.09608	98.5706	0.0635777	0.323611
10	2	6.64	106	973.9	977.5	975.7	2.6	1	29.4	0.615	39	660	90	2	0.0158944	1.09608	98.5706	0.0635777	0.223794
11	2	6.64	106	973.9	977.5	975.7	2.6	1	29.4	0.615	39	660	90	2	0.0158944	1.09608	98.5706	0.0635777	0.202177
12	2	6.64	106	973.9	977.5	975.7	2.6	1	29.4	0.615	39	660	90	2	0.0158944	1.09608	98.5706	0.0635777	0.275292
1	2	6.64	106	979	981.8	980.4	2.1	1.2	28.2	0.623	35	660	90	2	0.0193214	1.33241	98.5706	0.0772857	0.498493
2	2	6.64	106	979	981.8	980.4	2.1	1.2	28.2	0.623	35	660	90	2	0.0193214	1.33241	98.5706	0.0772857	0.386428
3	2	6.64	106	979	981.8	980.4	2.1	1.2	28.2	0.623	35	660	90	2	0.0193214	1.33241	98.5706	0.0772857	0.571914
4	2	6.64	106	979	981.8	980.4	2.1	1.2	28.2	0.623	35	660	90	2	0.0193214	1.33241	98.5706	0.0772857	0.434346
5	2	6.64	106	979	981.8	980.4	2.1	1.2	28.2	0.623	35	660	90	2	0.0193214	1.33241	98.5706	0.0772857	0.323827
6	2	6.64	106	979	981.8	980.4	2.1	1.2	28.2	0.623	35	660	90	2	0.0193214	1.33241	98.5706	0.0772857	0.215627
7	2	6.64	106	979	981.8	980.4	2.1	1.2	28.2	0.623	35	660	90	2	0.0193214	1.33241	98.5706	0.0772857	0.342376
8	2	6.64	106	979	981.8	980.4	2.1	1.2	28.2	0.623	35	660	90	2	0.0193214	1.33241	98.5706	0.0772857	0.295231
9	2	6.64	106	979	981.8	980.4	2.1	1.2	28.2	0.623	35	660	90	2	0.0193214	1.33241	98.5706	0.0772857	0.393384
10	2	6.64	106	979	981.8	980.4	2.1	1.2	28.2	0.623	35	660	90	2	0.0193214	1.33241	98.5706	0.0772857	0.272046
11	2	6.64	106	979	981.8	980.4	2.1	1.2	28.2	0.623	35	660	90	2	0.0193214	1.33241	98.5706	0.0772857	0.245769
12	2	6.64	106	979	981.8	980.4	2.1	1.2	28.2	0.623	35	660	90	2	0.0193214	1.33241	98.5706	0.0772857	0.334647
1	2	8.72	106	984.7	992.6	988.65	5.4	0.4	29.1	0.2	27	524.1	70	2	0.0058291	0.559859	98.9696	0.00883197	0.0743652
2	2	8.72	106	984.7	992.6	988.65	5.4	0.4	29.1	0.2	27	524.1	70	2	0.0058291	0.559859	98.9696	0.00883197	0.0713623
3	2	8.72	106	984.7	992.6	988.65	5.4	0.4	29.1	0.2	27	524.1	70	2	0.0058291	0.559859	98.9696	0.00883197	0.060234
4	2	8.72	106	984.7	992.6	988.65	5.4	0.4	29.1	0.2	27	524.1	70	2	0.0058291	0.559859	98.9696	0.00883197	0.0529918
5	2	8.72	106	984.7	992.6	988.65	5.4	0.4	29.1	0.2	27	524.1	70	2	0.0058291	0.559859	98.9696	0.00883197	0.049459
6	2	8.72	106	984.7	992.6	988.65	5.4	0.4	29.1	0.2	27	524.1	70	2	0.0058291	0.559859	98.9696	0.00883197	0.0438949
7	2	8.72	106	984.7	992.6	988.65	5.4	0.4	29.1	0.2	27	524.1	70	2	0.0058291	0.559859	98.9696	0.00883197	0.0440715
8	2	8.72	106	984.7	992.6	988.65	5.4	0.4	29.1	0.2	27	524.1	70	2	0.0058291	0.559859	98.9696	0.00883197	0.0590859
9	2	8.72	106	984.7	992.6	988.65	5.4	0.4	29.1	0.2	27	524.1	70	2	0.0058291	0.559859	98.9696	0.00883197	0.0527269
10	2	8.72	106	984.7	992.6	988.65	5.4	0.4	29.1	0.2	27	524.1	70	2	0.0058291	0.559859	98.9696	0.00883197	0.0377125
11	2	8.72	106	984.7	992.6	988.65	5.4	0.4	29.1	0.2	27	524.1	70	2	0.0058291	0.559859	98.9696	0.00883197	0.0362111
12	2	8.72	106	984.7	992.6	988.65	5.4	0.4	29.1	0.2	27	524.1	70	2	0.0058291	0.559859	98.9696	0.00883197	0.030382
1	2	11.61	175	998.9	1005	1001.95	4.9	3.3	29	0.323	32	281.82	47	2	3.2	33.5	91.2807	1	7.52
2	2	11.61	175	998.9	1005	1001.95	4.9	3.3	29	0.323	32	281.82	47	2	3.2	33.5	91.2807	1	7.4
3	2	11.61	175	998.9	1005	1001.95	4.9	3.3	29	0.323	32	281.82	47	2	3.2	33.5	91.2807	1	7.11
4	2	11.61	175	998.9	1005	1001.95	4.9	3.3	29	0.323	32	281.82	47	2	3.2	33.5	91.2807	1	5.95
5	2	11.61	175	998.9	1005	1001.95	4.9	3.3	29	0.323	32	281.82	47	2	3.2	33.5	91.2807	1	5.45
6	2	11.61	175	998.9	1005	1001.95	4.9	3.3	29	0.323	32	281.82	47	2	3.2	33.5	91.2807	1	7.31
7	2	11.61	175	998.9	1005	1001.95	4.9	3.3	29	0.323	32	281.82	47	2	3.2	33.5	91.2807	1	7.74
8	2	11.61	175	998.9	1005	1001.95	4.9	3.3	29	0.323	32	281.82	47	2	3.2	33.5	91.2807	1	7.23
9	2	11.61	175	998.9	1005	1001.95	4.9	3.3	29	0.323	32	281.82	47	2	3.2	33.5	91.2807	1	6.81
10	2	11.61	175	998.9	1005	1001.95	4.9	3.3	29	0.323	32	281.82	47	2	3.2	33.5	91.2807	1	5.6
11	2	11.61	175	998.9	1005	1001.95	4.9	3.3	29	0.323	32	281.82	47	2	3.2	33.5	91.2807	1	6.18
12	2	11.61	175	998.9	1005	1001.95	4.9	3.3	29	0.323	32	281.82	47	2	3.2	33.5	91.2807	1	5.25
1	2	9.06	125	969.7	979.6	974.65	7.5	4.2	32.9	1.193	20	178.16	29	2	1.44968	14.227	90.7526	0.457313	0.68597
2	2	9.06	125	969.7	979.6	974.65	7.5	4.2	32.9	1.193	20	178.16	29	2	1.44968	14.227	90.7526	0.457313	1.05639
3	2	9.06	125	969.7	979.6	974.65	7.5	4.2	32.9	1.193	20	178.16	29	2	1.44968	14.227	90.7526	0.457313	0.914627
4	2	9.06	125	969.7	979.6	974.65	7.5	4.2	32.9	1.193	20	178.16	29	2	1.44968	14.227	90.7526	0.457313	1.54572
5	2	9.06	125	969.7	979.6	974.65	7.5	4.2	32.9	1.193	20	178.16	29	2	1.44968	14.227	90.7526	0.457313	1.0381
6	2	9.06	125	969.7	979.6	974.65	7.5	4.2	32.9	1.193	20	178.16	29	2	1.44968	14.227	90.7526	0.457313	2.4512
7	2	9.06	125	969.7	979.6	974.65	7.5	4.2	32.9	1.193	20	178.16	29	2	1.44968	14.227	90.7526	0.457313	2.29114
8	2	9.06	125	969.7	979.6	974.65	7.5	4.2	32.9	1.193	20	178.16	29	2	1.44968	14.227	90.7526	0.457313	2.72559
9	2	9.06	125	969.7	979.6	974.65	7.5	4.2	32.9	1.193	20	178.16	29	2	1.44968	14.227	90.7526	0.457313	2.40547
10	2	9.06	125	969.7	979.6	974.65	7.5	4.2	32.9	1.193	20	178.16	29	2	1.44968	14.227	90.7526	0.457313	2.59754
11	2	9.06	125	969.7	979.6	974.65	7.5	4.2	32.9	1.193	20	178.16	29	2	1.44968	14.227	90.7526	0.457313	2.46492
12	2	9.06	125	969.7	979.6	974.65	7.5	4.2	32.9	1.193	20	178.16	29	2	1.44968	14.227	90.7526	0.457313	1.47712
1	2	9.06	125	981.1	989.4	985.25	5.4	2.6	31.7	0.454	22	178.46	29	2	0.341517	3.35161	90.7526	0.107734	0.161601
2	2	9.06	125	981.1	989.4	985.25	5.4	2.6	31.7	0.454	22	178.46	29	2	0.341517	3.35161	90.7526	0.107734	0.248866
3	2	9.06	125	981.1	989.4	985.25	5.4	2.6	31.7	0.454	22	178.46	29	2	0.341517	3.35161	90.7526	0.107734	0.215468
4	2	9.06	125	981.1	989.4	985.25	5.4	2.6	31.7	0.454	22	178.46	29	2	0.341517	3.35161	90.7526	0.107734	0.364141
5	2	9.06	125	981.1	989.4	985.25	5.4	2.6	31.7	0.454	22	178.46	29	2	0.341517	3.35161	90.7526	0.107734	0.244557
6	2	9.06	125	981.1	989.4	985.25	5.4	2.6	31.7	0.454	22	178.46	29	2	0.341517	3.35161	90.7526	0.107734	0.577455
7	2	9.06	125	981.1	989.4	985.25	5.4	2.6	31.7	0.454	22	178.46	29	2	0.341517	3.35161	90.7526	0.107734	0.539748
8	2	9.06	125	981.1	989.4	985.25	5.4	2.6	31.7	0.454	22	178.46	29	2	0.341517	3.35161	90.7526	0.107734	0.642096
9	2	9.06	125	981.1	989.4	985.25	5.4	2.6	31.7	0.454	22	178.46	29	2	0.341517	3.35161	90.7526	0.107734	0.566682
10	2	9.06	125	981.1	989.4	985.25	5.4	2.6	31.7	0.454	22	178.46	29	2	0.341517	3.35161	90.7526	0.107734	0.61193
11	2	9.06	125	981.1	989.4	985.25	5.4	2.6	31.7	0.454	22	178.46	29	2	0.341517	3.35161	90.7526	0.107734	0.580687
12	2	9.06	125	981.1	989.4	985.25	5.4	2.6	31.7	0.454	22	178.46	29	2	0.341517	3.35161	90.7526	0.107734	0.347981
1	2	12.18	150	969.1	972.7	970.9	2.7	1.3	29.5	0.421	28	222.62	37	2	0.520902	6.35663	92.426	0.271303	0.765075
2	2	12.18	150	969.1	972.7	970.9	2.7	1.3	29.5	0.421	28	222.62	37	2	0.520902	6.35663	92.426	0.271303	1.2073
3	2	12.18	150	969.1	972.7	970.9	2.7	1.3	29.5	0.421	28	222.62	37	2	0.520902	6.35663	92.426	0.271303	1.28326
4	2	12.18	150	969.1	972.7	970.9	2.7	1.3	29.5	0.421	28	222.62	37	2	0.520902	6.35663	92.426	0.271303	0.450363
1	2	10.13	150	1113.3	1120.7	1117	5.3	2.3	28.3	0.316	35	177.26	29	2	0.226946	5.20869	95.8248	0.184509	0.529541
2	2	10.13	150	1113.3	1120.7	1117	5.3	2.3	28.3	0.316	35	177.26	29	2	0.226946	5.20869	95.8248	0.184509	0.39854
3	2	10.13	150	1113.3	1120.7	1117	5.3	2.3	28.3	0.316	35	177.26	29	2	0.226946	5.20869	95.8248	0.184509	0.0166058
4	2	10.13	150	1113.3	1120.7	1117	5.3	2.3	28.3	0.316	35	177.26	29	2	0.226946	5.20869	95.8248	0.184509	0.0461273
5	2	10.13	150	1113.3	1120.7	1117	5.3	2.3	28.3	0.316	35	177.26	29	2	0.226946	5.20869	95.8248	0.184509	0.169748
6	2	10.13	150	1113.3	1120.7	1117	5.3	2.3	28.3	0.316	35	177.26	29	2	0.226946	5.20869	95.8248	0.184509	0.188199
7	2	10.13	150	1113.3	1120.7	1117	5.3	2.3	28.3	0.316	35	177.26	29	2	0.226946	5.20869	95.8248	0.184509	0.143917
8	2	10.13	150	1113.3	1120.7	1117	5.3	2.3	28.3	0.316	35	177.26	29	2	0.226946	5.20869	95.8248	0.184509	0.236172
9	2	10.13	150	1113.3	1120.7	1117	5.3	2.3	28.3	0.316	35	177.26	29	2	0.226946	5.20869	95.8248	0.184509	0.0719586
10	2	10.13	150	1113.3	1120.7	1117	5.3	2.3	28.3	0.316	35	177.26	29	2	0.226946	5.20869	95.8248	0.184509	0.142072
11	2	10.13	150	1113.3	1120.7	1117	5.3	2.3	28.3	0.316	35	177.26	29	2	0.226946	5.20869	95.8248	0.184509	0.0719586
12	2	10.13	150	1113.3	1120.7	1117	5.3	2.3	28.3	0.316	35	177.26	29	2	0.226946	5.20869	95.8248	0.184509	0.116241
1	2	12.65	150	1036.5	1041	1038.75	3.9	2.6	27.9	0.659	29	79.38	12	2	2.25	25.32	91.839	1	1.7
2	2	12.65	150	1036.5	1041	1038.75	3.9	2.6	27.9	0.659	29	79.38	12	2	2.25	25.32	91.839	1	2.2
3	2	12.65	150	1036.5	1041	1038.75	3.9	2.6	27.9	0.659	29	79.38	12	2	2.25	25.32	91.839	1	1.43
4	2	12.65	150	1036.5	1041	1038.75	3.9	2.6	27.9	0.659	29	79.38	12	2	2.25	25.32	91.839	1	1.84
5	2	12.65	150	1036.5	1041	1038.75	3.9	2.6	27.9	0.659	29	79.38	12	2	2.25	25.32	91.839	1	1.46
6	2	12.65	150	1036.5	1041	1038.75	3.9	2.6	27.9	0.659	29	79.38	12	2	2.25	25.32	91.839	1	1.51
7	2	12.65	150	1036.5	1041	1038.75	3.9	2.6	27.9	0.659	29	79.38	12	2	2.25	25.32	91.839	1	1.98
8	2	12.65	150	1036.5	1041	1038.75	3.9	2.6	27.9	0.659	29	79.38	12	2	2.25	25.32	91.839	1	1.45
1	2	9.68	175	977.1	980.5	978.8	2.8	1.3	29.6	0.707	33	77.58	12	2	0.340192	6.3508	94.9157	0.161229	0.296661
2	2	9.68	175	977.1	980.5	978.8	2.8	1.3	29.6	0.707	33	77.58	12	2	0.340192	6.3508	94.9157	0.161229	0.601383
3	2	9.68	175	977.1	980.5	978.8	2.8	1.3	29.6	0.707	33	77.58	12	2	0.340192	6.3508	94.9157	0.161229	0.60622
4	2	9.68	175	977.1	980.5	978.8	2.8	1.3	29.6	0.707	33	77.58	12	2	0.340192	6.3508	94.9157	0.161229	0.43693
5	2	9.68	175	977.1	980.5	978.8	2.8	1.3	29.6	0.707	33	77.58	12	2	0.340192	6.3508	94.9157	0.161229	0.401459
6	2	9.68	175	977.1	980.5	978.8	2.8	1.3	29.6	0.707	33	77.58	12	2	0.340192	6.3508	94.9157	0.161229	0.425644
7	2	9.68	175	977.1	980.5	978.8	2.8	1.3	29.6	0.707	33	77.58	12	2	0.340192	6.3508	94.9157	0.161229	0.348254
8	2	9.68	175	977.1	980.5	978.8	2.8	1.3	29.6	0.707	33	77.58	12	2	0.340192	6.3508	94.9157	0.161229	0.243455
9	2	9.68	175	977.1	980.5	978.8	2.8	1.3	29.6	0.707	33	77.58	12	2	0.340192	6.3508	94.9157	0.161229	0.156392
10	2	9.68	175	977.1	980.5	978.8	2.8	1.3	29.6	0.707	33	77.58	12	2	0.340192	6.3508	94.9157	0.161229	0.232169
11	2	9.68	175	977.1	980.5	978.8	2.8	1.3	29.6	0.707	33	77.58	12	2	0.340192	6.3508	94.9157	0.161229	0.232169
12	2	9.68	175	977.1	980.5	978.8	2.8	1.3	29.6	0.707	33	77.58	12	2	0.340192	6.3508	94.9157	0.161229	0.24668
1	2	8.93	125	948	952.2	950.1	3.6	2.3	31.3	0.962	28	122.9	19	2	0.0880701	14.9997	99.4163	0.463527	0.0463527
2	2	8.93	125	948	952.2	950.1	3.6	2.3	31.3	0.962	28	122.9	19	2	0.0880701	14.9997	99.4163	0.463527	0.101976
3	2	8.93	125	948	952.2	950.1	3.6	2.3	31.3	0.962	28	122.9	19	2	0.0880701	14.9997	99.4163	0.463527	0.0463527
4	2	8.93	125	948	952.2	950.1	3.6	2.3	31.3	0.962	28	122.9	19	2	0.0880701	14.9997	99.4163	0.463527	0.0417174
5	2	8.93	125	948	952.2	950.1	3.6	2.3	31.3	0.962	28	122.9	19	2	0.0880701	14.9997	99.4163	0.463527	0.0324469
6	2	8.93	125	948	952.2	950.1	3.6	2.3	31.3	0.962	28	122.9	19	2	0.0880701	14.9997	99.4163	0.463527	0.0463527
7	2	8.93	125	948	952.2	950.1	3.6	2.3	31.3	0.962	28	122.9	19	2	0.0880701	14.9997	99.4163	0.463527	0.0185411
1	2	8.93	125	963.3	969.3	966.3	5.1	2	27.5	0.281	29	141.66	23	2	0.0223698	3.80993	99.4163	0.117736	0.0117736
2	2	8.93	125	963.3	969.3	966.3	5.1	2	27.5	0.281	29	141.66	23	2	0.0223698	3.80993	99.4163	0.117736	0.0259019
3	2	8.93	125	963.3	969.3	966.3	5.1	2	27.5	0.281	29	141.66	23	2	0.0223698	3.80993	99.4163	0.117736	0.0117736
4	2	8.93	125	963.3	969.3	966.3	5.1	2	27.5	0.281	29	141.66	23	2	0.0223698	3.80993	99.4163	0.117736	0.0105962
5	2	8.93	125	963.3	969.3	966.3	5.1	2	27.5	0.281	29	141.66	23	2	0.0223698	3.80993	99.4163	0.117736	0.00824151
6	2	8.93	125	963.3	969.3	966.3	5.1	2	27.5	0.281	29	141.66	23	2	0.0223698	3.80993	99.4163	0.117736	0.0117736
7	2	8.93	125	963.3	969.3	966.3	5.1	2	27.5	0.281	29	141.66	23	2	0.0223698	3.80993	99.4163	0.117736	0.00470943
1	2	8.93	125	973.1	981.8	977.45	4.3	1.9	31.6	0.83	26	118.38	19	2	0.0627708	10.6909	99.4163	0.330372	0.0330372
2	2	8.93	125	973.1	981.8	977.45	4.3	1.9	31.6	0.83	26	118.38	19	2	0.0627708	10.6909	99.4163	0.330372	0.0726819
3	2	8.93	125	973.1	981.8	977.45	4.3	1.9	31.6	0.83	26	118.38	19	2	0.0627708	10.6909	99.4163	0.330372	0.0330372
4	2	8.93	125	973.1	981.8	977.45	4.3	1.9	31.6	0.83	26	118.38	19	2	0.0627708	10.6909	99.4163	0.330372	0.0297335
5	2	8.93	125	973.1	981.8	977.45	4.3	1.9	31.6	0.83	26	118.38	19	2	0.0627708	10.6909	99.4163	0.330372	0.0231261
6	2	8.93	125	973.1	981.8	977.45	4.3	1.9	31.6	0.83	26	118.38	19	2	0.0627708	10.6909	99.4163	0.330372	0.0330372
7	2	8.93	125	973.1	981.8	977.45	4.3	1.9	31.6	0.83	26	118.38	19	2	0.0627708	10.6909	99.4163	0.330372	0.0132149
1	2	8.93	125	983.8	991.9	987.85	5.9	3.8	28.8	0.111	29	111.42	17	2	0.0167893	2.85948	99.4163	0.0883647	0.00883647
2	2	8.93	125	983.8	991.9	987.85	5.9	3.8	28.8	0.111	29	111.42	17	2	0.0167893	2.85948	99.4163	0.0883647	0.0194402
3	2	8.93	125	983.8	991.9	987.85	5.9	3.8	28.8	0.111	29	111.42	17	2	0.0167893	2.85948	99.4163	0.0883647	0.00883647
4	2	8.93	125	983.8	991.9	987.85	5.9	3.8	28.8	0.111	29	111.42	17	2	0.0167893	2.85948	99.4163	0.0883647	0.00795282
5	2	8.93	125	983.8	991.9	987.85	5.9	3.8	28.8	0.111	29	111.42	17	2	0.0167893	2.85948	99.4163	0.0883647	0.00618553
6	2	8.93	125	983.8	991.9	987.85	5.9	3.8	28.8	0.111	29	111.42	17	2	0.0167893	2.85948	99.4163	0.0883647	0.00883647
7	2	8.93	125	983.8	991.9	987.85	5.9	3.8	28.8	0.111	29	111.42	17	2	0.0167893	2.85948	99.4163	0.0883647	0.00353459
1	2	11.54	150	1118.5	1121.3	1119.9	2.3	2	27.7	0.311	31	177.54	29	2	0.243756	4.69901	95.0684	0.127621	0.788699
2	2	11.54	150	1118.5	1121.3	1119.9	2.3	2	27.7	0.311	31	177.54	29	2	0.243756	4.69901	95.0684	0.127621	0.779765
3	2	11.54	150	1118.5	1121.3	1119.9	2.3	2	27.7	0.311	31	177.54	29	2	0.243756	4.69901	95.0684	0.127621	0.362444
4	2	11.54	150	1118.5	1121.3	1119.9	2.3	2	27.7	0.311	31	177.54	29	2	0.243756	4.69901	95.0684	0.127621	0.493894
5	2	11.54	150	1118.5	1121.3	1119.9	2.3	2	27.7	0.311	31	177.54	29	2	0.243756	4.69901	95.0684	0.127621	0.389245
6	2	11.54	150	1118.5	1121.3	1119.9	2.3	2	27.7	0.311	31	177.54	29	2	0.243756	4.69901	95.0684	0.127621	0.329263
7	2	11.54	150	1118.5	1121.3	1119.9	2.3	2	27.7	0.311	31	177.54	29	2	0.243756	4.69901	95.0684	0.127621	0.237375
8	2	11.54	150	1118.5	1121.3	1119.9	2.3	2	27.7	0.311	31	177.54	29	2	0.243756	4.69901	95.0684	0.127621	0.165908
9	2	11.54	150	1118.5	1121.3	1119.9	2.3	2	27.7	0.311	31	177.54	29	2	0.243756	4.69901	95.0684	0.127621	0.017867
10	2	11.54	150	1118.5	1121.3	1119.9	2.3	2	27.7	0.311	31	177.54	29	2	0.243756	4.69901	95.0684	0.127621	0.0165908
11	2	11.54	150	1118.5	1121.3	1119.9	2.3	2	27.7	0.311	31	177.54	29	2	0.243756	4.69901	95.0684	0.127621	0.0446674
1	2	9.77	150	1050	1057.4	1053.7	6.9	2.7	28.4	0.454	27	226.68	37	2	0.924148	15.3435	94.3191	0.442176	0.601359
2	2	9.77	150	1050	1057.4	1053.7	6.9	2.7	28.4	0.454	27	226.68	37	2	0.924148	15.3435	94.3191	0.442176	0.265306
1	2	9.4	125	889.3	895.4	892.35	5.5	3.9	31.3	0.902	20	96.22	15	2	0.212944	5.51909	96.285	0.349089	1.69308
2	2	9.4	125	889.3	895.4	892.35	5.5	3.9	31.3	0.902	20	96.22	15	2	0.212944	5.51909	96.285	0.349089	2.32842
3	2	9.4	125	889.3	895.4	892.35	5.5	3.9	31.3	0.902	20	96.22	15	2	0.212944	5.51909	96.285	0.349089	2.02471
4	2	9.4	125	889.3	895.4	892.35	5.5	3.9	31.3	0.902	20	96.22	15	2	0.212944	5.51909	96.285	0.349089	1.7629
5	2	9.4	125	889.3	895.4	892.35	5.5	3.9	31.3	0.902	20	96.22	15	2	0.212944	5.51909	96.285	0.349089	1.49759
6	2	9.4	125	889.3	895.4	892.35	5.5	3.9	31.3	0.902	20	96.22	15	2	0.212944	5.51909	96.285	0.349089	1.86064
7	2	9.4	125	889.3	895.4	892.35	5.5	3.9	31.3	0.902	20	96.22	15	2	0.212944	5.51909	96.285	0.349089	1.44174
8	2	9.4	125	889.3	895.4	892.35	5.5	3.9	31.3	0.902	20	96.22	15	2	0.212944	5.51909	96.285	0.349089	1.3405
9	2	9.4	125	889.3	895.4	892.35	5.5	3.9	31.3	0.902	20	96.22	15	2	0.212944	5.51909	96.285	0.349089	1.25323
10	2	9.4	125	889.3	895.4	892.35	5.5	3.9	31.3	0.902	20	96.22	15	2	0.212944	5.51909	96.285	0.349089	1.29512
11	2	9.4	125	889.3	895.4	892.35	5.5	3.9	31.3	0.902	20	96.22	15	2	0.212944	5.51909	96.285	0.349089	1.16945
12	2	9.4	125	889.3	895.4	892.35	5.5	3.9	31.3	0.902	20	96.22	15	2	0.212944	5.51909	96.285	0.349089	0.886685
1	2	9.4	125	896.8	899.6	898.2	2	1.5	31.3	0.402	27	143.58	23	2	0.0365016	0.946049	96.285	0.0598386	0.290217
2	2	9.4	125	896.8	899.6	898.2	2	1.5	31.3	0.402	27	143.58	23	2	0.0365016	0.946049	96.285	0.0598386	0.399124
3	2	9.4	125	896.8	899.6	898.2	2	1.5	31.3	0.402	27	143.58	23	2	0.0365016	0.946049	96.285	0.0598386	0.347064
4	2	9.4	125	896.8	899.6	898.2	2	1.5	31.3	0.402	27	143.58	23	2	0.0365016	0.946049	96.285	0.0598386	0.302185
5	2	9.4	125	896.8	899.6	898.2	2	1.5	31.3	0.402	27	143.58	23	2	0.0365016	0.946049	96.285	0.0598386	0.256708
6	2	9.4	125	896.8	899.6	898.2	2	1.5	31.3	0.402	27	143.58	23	2	0.0365016	0.946049	96.285	0.0598386	0.31894
7	2	9.4	125	896.8	899.6	898.2	2	1.5	31.3	0.402	27	143.58	23	2	0.0365016	0.946049	96.285	0.0598386	0.247134
8	2	9.4	125	896.8	899.6	898.2	2	1.5	31.3	0.402	27	143.58	23	2	0.0365016	0.946049	96.285	0.0598386	0.22978
9	2	9.4	125	896.8	899.6	898.2	2	1.5	31.3	0.402	27	143.58	23	2	0.0365016	0.946049	96.285	0.0598386	0.214821
10	2	9.4	125	896.8	899.6	898.2	2	1.5	31.3	0.402	27	143.58	23	2	0.0365016	0.946049	96.285	0.0598386	0.222001
11	2	9.4	125	896.8	899.6	898.2	2	1.5	31.3	0.402	27	143.58	23	2	0.0365016	0.946049	96.285	0.0598386	0.200459
12	2	9.4	125	896.8	899.6	898.2	2	1.5	31.3	0.402	27	143.58	23	2	0.0365016	0.946049	96.285	0.0598386	0.15199
1	2	9.4	125	924.1	930.5	927.3	4.4	1.9	32.2	0.781	23	179.89	29	2	0.0898253	2.3281	96.285	0.147255	0.714185
2	2	9.4	125	924.1	930.5	927.3	4.4	1.9	32.2	0.781	23	179.89	29	2	0.0898253	2.3281	96.285	0.147255	0.982189
3	2	9.4	125	924.1	930.5	927.3	4.4	1.9	32.2	0.781	23	179.89	29	2	0.0898253	2.3281	96.285	0.147255	0.854077
4	2	9.4	125	924.1	930.5	927.3	4.4	1.9	32.2	0.781	23	179.89	29	2	0.0898253	2.3281	96.285	0.147255	0.743636
5	2	9.4	125	924.1	930.5	927.3	4.4	1.9	32.2	0.781	23	179.89	29	2	0.0898253	2.3281	96.285	0.147255	0.631723
6	2	9.4	125	924.1	930.5	927.3	4.4	1.9	32.2	0.781	23	179.89	29	2	0.0898253	2.3281	96.285	0.147255	0.784867
7	2	9.4	125	924.1	930.5	927.3	4.4	1.9	32.2	0.781	23	179.89	29	2	0.0898253	2.3281	96.285	0.147255	0.608162
8	2	9.4	125	924.1	930.5	927.3	4.4	1.9	32.2	0.781	23	179.89	29	2	0.0898253	2.3281	96.285	0.147255	0.565458
9	2	9.4	125	924.1	930.5	927.3	4.4	1.9	32.2	0.781	23	179.89	29	2	0.0898253	2.3281	96.285	0.147255	0.528644
10	2	9.4	125	924.1	930.5	927.3	4.4	1.9	32.2	0.781	23	179.89	29	2	0.0898253	2.3281	96.285	0.147255	0.546315
11	2	9.4	125	924.1	930.5	927.3	4.4	1.9	32.2	0.781	23	179.89	29	2	0.0898253	2.3281	96.285	0.147255	0.493303
12	2	9.4	125	924.1	930.5	927.3	4.4	1.9	32.2	0.781	23	179.89	29	2	0.0898253	2.3281	96.285	0.147255	0.374027
1	2	9.4	106	924.8	927.7	926.25	2	0.7	29.3	0.207	28	176.78	29	2	0.0946339	0.953779	90.9736	0.0297591	0.110109
2	2	9.4	106	924.8	927.7	926.25	2	0.7	29.3	0.207	28	176.78	29	2	0.0946339	0.953779	90.9736	0.0297591	0.275272
3	2	9.4	106	924.8	927.7	926.25	2	0.7	29.3	0.207	28	176.78	29	2	0.0946339	0.953779	90.9736	0.0297591	0.293425
4	2	9.4	106	924.8	927.7	926.25	2	0.7	29.3	0.207	28	176.78	29	2	0.0946339	0.953779	90.9736	0.0297591	0.378238
5	2	9.4	106	924.8	927.7	926.25	2	0.7	29.3	0.207	28	176.78	29	2	0.0946339	0.953779	90.9736	0.0297591	0.438649
6	2	9.4	106	924.8	927.7	926.25	2	0.7	29.3	0.207	28	176.78	29	2	0.0946339	0.953779	90.9736	0.0297591	0.405319
7	2	9.4	106	924.8	927.7	926.25	2	0.7	29.3	0.207	28	176.78	29	2	0.0946339	0.953779	90.9736	0.0297591	0.341039
8	2	9.4	106	924.8	927.7	926.25	2	0.7	29.3	0.207	28	176.78	29	2	0.0946339	0.953779	90.9736	0.0297591	0.310685
9	2	9.4	106	924.8	927.7	926.25	2	0.7	29.3	0.207	28	176.78	29	2	0.0946339	0.953779	90.9736	0.0297591	0.178257
10	2	9.4	106	924.8	927.7	926.25	2	0.7	29.3	0.207	28	176.78	29	2	0.0946339	0.953779	90.9736	0.0297591	0.1482
11	2	9.4	106	924.8	927.7	926.25	2	0.7	29.3	0.207	28	176.78	29	2	0.0946339	0.953779	90.9736	0.0297591	0.0708266
1	2	9.02	125	954.5	957.8	956.15	2.2	0.8	31.3	0.345	27	179.42	29	2	0.448815	3.51672	88.6821	0.0858156	0.259163
2	2	9.02	125	954.5	957.8	956.15	2.2	0.8	31.3	0.345	27	179.42	29	2	0.448815	3.51672	88.6821	0.0858156	0.454822
3	2	9.02	125	954.5	957.8	956.15	2.2	0.8	31.3	0.345	27	179.42	29	2	0.448815	3.51672	88.6821	0.0858156	0.468553
4	2	9.02	125	954.5	957.8	956.15	2.2	0.8	31.3	0.345	27	179.42	29	2	0.448815	3.51672	88.6821	0.0858156	0.719134
5	2	9.02	125	954.5	957.8	956.15	2.2	0.8	31.3	0.345	27	179.42	29	2	0.448815	3.51672	88.6821	0.0858156	0.767191
6	2	9.02	125	954.5	957.8	956.15	2.2	0.8	31.3	0.345	27	179.42	29	2	0.448815	3.51672	88.6821	0.0858156	0.786071
7	2	9.02	125	954.5	957.8	956.15	2.2	0.8	31.3	0.345	27	179.42	29	2	0.448815	3.51672	88.6821	0.0858156	0.642759
8	2	9.02	125	954.5	957.8	956.15	2.2	0.8	31.3	0.345	27	179.42	29	2	0.448815	3.51672	88.6821	0.0858156	0.480567
9	2	9.02	125	954.5	957.8	956.15	2.2	0.8	31.3	0.345	27	179.42	29	2	0.448815	3.51672	88.6821	0.0858156	0.411057
10	2	9.02	125	954.5	957.8	956.15	2.2	0.8	31.3	0.345	27	179.42	29	2	0.448815	3.51672	88.6821	0.0858156	0.580971
11	2	9.02	125	954.5	957.8	956.15	2.2	0.8	31.3	0.345	27	179.42	29	2	0.448815	3.51672	88.6821	0.0858156	0.442808
1	2	10.3	150	1082	1087.5	1084.75	2	0.5	27.4	0.101	21	226.72	37	2	0.00205433	0.402555	99.4923	0.00933785	0.0108319
2	2	10.3	150	1082	1087.5	1084.75	2	0.5	27.4	0.101	21	226.72	37	2	0.00205433	0.402555	99.4923	0.00933785	0.0158743
3	2	10.3	150	1082	1087.5	1084.75	2	0.5	27.4	0.101	21	226.72	37	2	0.00205433	0.402555	99.4923	0.00933785	0.00989812
4	2	10.3	150	1082	1087.5	1084.75	2	0.5	27.4	0.101	21	226.72	37	2	0.00205433	0.402555	99.4923	0.00933785	0.00961798
5	2	10.3	150	1082	1087.5	1084.75	2	0.5	27.4	0.101	21	226.72	37	2	0.00205433	0.402555	99.4923	0.00933785	0.0115789
6	2	10.3	150	1082	1087.5	1084.75	2	0.5	27.4	0.101	21	226.72	37	2	0.00205433	0.402555	99.4923	0.00933785	0.0156876
7	2	10.3	150	1082	1087.5	1084.75	2	0.5	27.4	0.101	21	226.72	37	2	0.00205433	0.402555	99.4923	0.00933785	0.0155008
8	2	10.3	150	1082	1087.5	1084.75	2	0.5	27.4	0.101	21	226.72	37	2	0.00205433	0.402555	99.4923	0.00933785	0.014567
9	2	10.3	150	1082	1087.5	1084.75	2	0.5	27.4	0.101	21	226.72	37	2	0.00205433	0.402555	99.4923	0.00933785	0.0167147
10	2	10.3	150	1082	1087.5	1084.75	2	0.5	27.4	0.101	21	226.72	37	2	0.00205433	0.402555	99.4923	0.00933785	0.0175551
11	2	10.3	150	1082	1087.5	1084.75	2	0.5	27.4	0.101	21	226.72	37	2	0.00205433	0.402555	99.4923	0.00933785	0.0250254
12	2	10.3	150	1082	1087.5	1084.75	2	0.5	27.4	0.101	21	226.72	37	2	0.00205433	0.402555	99.4923	0.00933785	0.0305348
1	2	12.04	150	1107.6	1113.8	1110.7	3.5	2.4	27.4	0.313	27	225.78	37	2	0.0842443	6.73306	98.7643	0.216011	0.892126
2	2	12.04	150	1107.6	1113.8	1110.7	3.5	2.4	27.4	0.313	27	225.78	37	2	0.0842443	6.73306	98.7643	0.216011	1.16646
3	2	12.04	150	1107.6	1113.8	1110.7	3.5	2.4	27.4	0.313	27	225.78	37	2	0.0842443	6.73306	98.7643	0.216011	1.05197
4	2	12.04	150	1107.6	1113.8	1110.7	3.5	2.4	27.4	0.313	27	225.78	37	2	0.0842443	6.73306	98.7643	0.216011	0.131767
5	2	12.04	150	1107.6	1113.8	1110.7	3.5	2.4	27.4	0.313	27	225.78	37	2	0.0842443	6.73306	98.7643	0.216011	0.166329
6	2	12.04	150	1107.6	1113.8	1110.7	3.5	2.4	27.4	0.313	27	225.78	37	2	0.0842443	6.73306	98.7643	0.216011	0.177129
7	2	12.04	150	1107.6	1113.8	1110.7	3.5	2.4	27.4	0.313	27	225.78	37	2	0.0842443	6.73306	98.7643	0.216011	0.20089
8	2	12.04	150	1107.6	1113.8	1110.7	3.5	2.4	27.4	0.313	27	225.78	37	2	0.0842443	6.73306	98.7643	0.216011	0.291615
9	2	12.04	150	1107.6	1113.8	1110.7	3.5	2.4	27.4	0.313	27	225.78	37	2	0.0842443	6.73306	98.7643	0.216011	0.270014
10	2	12.04	150	1107.6	1113.8	1110.7	3.5	2.4	27.4	0.313	27	225.78	37	2	0.0842443	6.73306	98.7643	0.216011	0.302415
11	2	12.04	150	1107.6	1113.8	1110.7	3.5	2.4	27.4	0.313	27	225.78	37	2	0.0842443	6.73306	98.7643	0.216011	0.302415
12	2	12.04	150	1107.6	1113.8	1110.7	3.5	2.4	27.4	0.313	27	225.78	37	2	0.0842443	6.73306	98.7643	0.216011	0.302415
1	2	12.04	150	1117.6	1122.6	1120.1	4.2	2.4	28.4	0.49	37	201.68	33	2	0.131884	10.5406	98.7643	0.338164	1.39662
2	2	12.04	150	1117.6	1122.6	1120.1	4.2	2.4	28.4	0.49	37	201.68	33	2	0.131884	10.5406	98.7643	0.338164	1.82609
3	2	12.04	150	1117.6	1122.6	1120.1	4.2	2.4	28.4	0.49	37	201.68	33	2	0.131884	10.5406	98.7643	0.338164	1.64686
4	2	12.04	150	1117.6	1122.6	1120.1	4.2	2.4	28.4	0.49	37	201.68	33	2	0.131884	10.5406	98.7643	0.338164	0.20628
5	2	12.04	150	1117.6	1122.6	1120.1	4.2	2.4	28.4	0.49	37	201.68	33	2	0.131884	10.5406	98.7643	0.338164	0.260386
6	2	12.04	150	1117.6	1122.6	1120.1	4.2	2.4	28.4	0.49	37	201.68	33	2	0.131884	10.5406	98.7643	0.338164	0.277295
7	2	12.04	150	1117.6	1122.6	1120.1	4.2	2.4	28.4	0.49	37	201.68	33	2	0.131884	10.5406	98.7643	0.338164	0.314493
8	2	12.04	150	1117.6	1122.6	1120.1	4.2	2.4	28.4	0.49	37	201.68	33	2	0.131884	10.5406	98.7643	0.338164	0.456522
9	2	12.04	150	1117.6	1122.6	1120.1	4.2	2.4	28.4	0.49	37	201.68	33	2	0.131884	10.5406	98.7643	0.338164	0.422705
10	2	12.04	150	1117.6	1122.6	1120.1	4.2	2.4	28.4	0.49	37	201.68	33	2	0.131884	10.5406	98.7643	0.338164	0.47343
11	2	12.04	150	1117.6	1122.6	1120.1	4.2	2.4	28.4	0.49	37	201.68	33	2	0.131884	10.5406	98.7643	0.338164	0.47343
12	2	12.04	150	1117.6	1122.6	1120.1	4.2	2.4	28.4	0.49	37	201.68	33	2	0.131884	10.5406	98.7643	0.338164	0.47343
1	2	9.28	150	998.1	1002.7	1000.4	3.4	1.2	31.7	0.434	32	179.06	29	2	1.08897	7.73298	87.6561	0.423725	1.20762
2	2	9.28	150	998.1	1002.7	1000.4	3.4	1.2	31.7	0.434	32	179.06	29	2	1.08897	7.73298	87.6561	0.423725	0.152541
3	2	9.28	150	998.1	1002.7	1000.4	3.4	1.2	31.7	0.434	32	179.06	29	2	1.08897	7.73298	87.6561	0.423725	0.105931
1	2	9.28	150	1005.3	1010.2	1007.75	3.5	0.9	28.6	0.199	29	224.53	37	2	0.374491	2.65932	87.6561	0.145716	0.415292
2	2	9.28	150	1005.3	1010.2	1007.75	3.5	0.9	28.6	0.199	29	224.53	37	2	0.374491	2.65932	87.6561	0.145716	0.0524579
3	2	9.28	150	1005.3	1010.2	1007.75	3.5	0.9	28.6	0.199	29	224.53	37	2	0.374491	2.65932	87.6561	0.145716	0.0364291
1	2	9.96	106	979	983.2	981.1	11.5	3.2	31.4	0.24	47	610	90	2	0.336286	6.80639	95.2919	0.104762	0.337334
2	2	9.96	106	979	983.2	981.1	11.5	3.2	31.4	0.24	47	610	90	2	0.336286	6.80639	95.2919	0.104762	0.450477
3	2	9.96	106	979	983.2	981.1	11.5	3.2	31.4	0.24	47	610	90	2	0.336286	6.80639	95.2919	0.104762	0.208476
4	2	9.96	106	979	983.2	981.1	11.5	3.2	31.4	0.24	47	610	90	2	0.336286	6.80639	95.2919	0.104762	0.168667
1	2	10.64	150	1118.8	1124	1121.4	3.8	1.3	26.6	0.184	25	180.56	29	2	0.365365	5.60607	93.8815	0.190294	0.955278
2	2	10.64	150	1118.8	1124	1121.4	3.8	1.3	26.6	0.184	25	180.56	29	2	0.365365	5.60607	93.8815	0.190294	0.216936
3	2	10.64	150	1118.8	1124	1121.4	3.8	1.3	26.6	0.184	25	180.56	29	2	0.365365	5.60607	93.8815	0.190294	0.0818266
4	2	10.64	150	1118.8	1124	1121.4	3.8	1.3	26.6	0.184	25	180.56	29	2	0.365365	5.60607	93.8815	0.190294	0.0494765
5	2	10.64	150	1118.8	1124	1121.4	3.8	1.3	26.6	0.184	25	180.56	29	2	0.365365	5.60607	93.8815	0.190294	0.0589912
1	2	10.64	150	1088.1	1092.3	1090.2	3.1	2.7	28.9	0.468	30	143.96	23	2	0.25556	17.7756	98.5827	0.473258	1.78418
2	2	10.64	150	1088.1	1092.3	1090.2	3.1	2.7	28.9	0.468	30	143.96	23	2	0.25556	17.7756	98.5827	0.473258	1.0459
3	2	10.64	150	1088.1	1092.3	1090.2	3.1	2.7	28.9	0.468	30	143.96	23	2	0.25556	17.7756	98.5827	0.473258	0.463793
4	2	10.64	150	1088.1	1092.3	1090.2	3.1	2.7	28.9	0.468	30	143.96	23	2	0.25556	17.7756	98.5827	0.473258	0.601038
5	2	10.64	150	1088.1	1092.3	1090.2	3.1	2.7	28.9	0.468	30	143.96	23	2	0.25556	17.7756	98.5827	0.473258	0.771411
6	2	10.64	150	1088.1	1092.3	1090.2	3.1	2.7	28.9	0.468	30	143.96	23	2	0.25556	17.7756	98.5827	0.473258	0.752481
7	2	10.64	150	1088.1	1092.3	1090.2	3.1	2.7	28.9	0.468	30	143.96	23	2	0.25556	17.7756	98.5827	0.473258	0.364409
8	2	10.64	150	1088.1	1092.3	1090.2	3.1	2.7	28.9	0.468	30	143.96	23	2	0.25556	17.7756	98.5827	0.473258	0.222431
9	2	10.64	150	1088.1	1092.3	1090.2	3.1	2.7	28.9	0.468	30	143.96	23	2	0.25556	17.7756	98.5827	0.473258	1.32986
10	2	10.64	150	1088.1	1092.3	1090.2	3.1	2.7	28.9	0.468	30	143.96	23	2	0.25556	17.7756	98.5827	0.473258	2.4988
11	2	10.64	150	1088.1	1092.3	1090.2	3.1	2.7	28.9	0.468	30	143.96	23	2	0.25556	17.7756	98.5827	0.473258	1.15475
12	2	10.64	150	1088.1	1092.3	1090.2	3.1	2.7	28.9	0.468	30	143.96	23	2	0.25556	17.7756	98.5827	0.473258	1.22574
1	2	10.64	150	1093.6	1097.6	1095.6	3.5	2	28.6	0.419	30	142.16	23	2	0.169483	11.7885	98.5827	0.313858	1.18324
2	2	10.64	150	1093.6	1097.6	1095.6	3.5	2	28.6	0.419	30	142.16	23	2	0.169483	11.7885	98.5827	0.313858	0.693625
3	2	10.64	150	1093.6	1097.6	1095.6	3.5	2	28.6	0.419	30	142.16	23	2	0.169483	11.7885	98.5827	0.313858	0.307581
4	2	10.64	150	1093.6	1097.6	1095.6	3.5	2	28.6	0.419	30	142.16	23	2	0.169483	11.7885	98.5827	0.313858	0.398599
5	2	10.64	150	1093.6	1097.6	1095.6	3.5	2	28.6	0.419	30	142.16	23	2	0.169483	11.7885	98.5827	0.313858	0.511588
6	2	10.64	150	1093.6	1097.6	1095.6	3.5	2	28.6	0.419	30	142.16	23	2	0.169483	11.7885	98.5827	0.313858	0.499034
7	2	10.64	150	1093.6	1097.6	1095.6	3.5	2	28.6	0.419	30	142.16	23	2	0.169483	11.7885	98.5827	0.313858	0.24167
8	2	10.64	150	1093.6	1097.6	1095.6	3.5	2	28.6	0.419	30	142.16	23	2	0.169483	11.7885	98.5827	0.313858	0.147513
9	2	10.64	150	1093.6	1097.6	1095.6	3.5	2	28.6	0.419	30	142.16	23	2	0.169483	11.7885	98.5827	0.313858	0.88194
10	2	10.64	150	1093.6	1097.6	1095.6	3.5	2	28.6	0.419	30	142.16	23	2	0.169483	11.7885	98.5827	0.313858	1.65717
11	2	10.64	150	1093.6	1097.6	1095.6	3.5	2	28.6	0.419	30	142.16	23	2	0.169483	11.7885	98.5827	0.313858	0.765813
12	2	10.64	150	1093.6	1097.6	1095.6	3.5	2	28.6	0.419	30	142.16	23	2	0.169483	11.7885	98.5827	0.313858	0.812891
1	2	11.54	150	1136.9	1141	1138.95	3.3	2.7	29.7	0.494	27	145.02	23	2	0.626355	11.6071	94.88	0.279623	3.12898
2	2	11.54	150	1136.9	1141	1138.95	3.3	2.7	29.7	0.494	27	145.02	23	2	0.626355	11.6071	94.88	0.279623	1.71409
3	2	11.54	150	1136.9	1141	1138.95	3.3	2.7	29.7	0.494	27	145.02	23	2	0.626355	11.6071	94.88	0.279623	1.51276
4	2	11.54	150	1136.9	1141	1138.95	3.3	2.7	29.7	0.494	27	145.02	23	2	0.626355	11.6071	94.88	0.279623	0.405453
5	2	11.54	150	1136.9	1141	1138.95	3.3	2.7	29.7	0.494	27	145.02	23	2	0.626355	11.6071	94.88	0.279623	0.332751
6	2	11.54	150	1136.9	1141	1138.95	3.3	2.7	29.7	0.494	27	145.02	23	2	0.626355	11.6071	94.88	0.279623	0.402657
7	2	11.54	150	1136.9	1141	1138.95	3.3	2.7	29.7	0.494	27	145.02	23	2	0.626355	11.6071	94.88	0.279623	0.268438
8	2	11.54	150	1136.9	1141	1138.95	3.3	2.7	29.7	0.494	27	145.02	23	2	0.626355	11.6071	94.88	0.279623	0.503321
9	2	11.54	150	1136.9	1141	1138.95	3.3	2.7	29.7	0.494	27	145.02	23	2	0.626355	11.6071	94.88	0.279623	0.685075
10	2	11.54	150	1136.9	1141	1138.95	3.3	2.7	29.7	0.494	27	145.02	23	2	0.626355	11.6071	94.88	0.279623	0.707445
11	2	11.54	150	1136.9	1141	1138.95	3.3	2.7	29.7	0.494	27	145.02	23	2	0.626355	11.6071	94.88	0.279623	0.738204
12	2	11.54	150	1136.9	1141	1138.95	3.3	2.7	29.7	0.494	27	145.02	23	2	0.626355	11.6071	94.88	0.279623	0.671094
1	2	11.09	150	1083.1	1087.6	1085.35	2.9	1.7	30.7	0.304	25	203.78	33	2	0	0	0	0.41664	2.31235
2	2	11.09	150	1083.1	1087.6	1085.35	2.9	1.7	30.7	0.304	25	203.78	33	2	0	0	0	0.41664	3.33312
3	2	11.09	150	1083.1	1087.6	1085.35	2.9	1.7	30.7	0.304	25	203.78	33	2	0	0	0	0.41664	1.68739
4	2	11.09	150	1083.1	1087.6	1085.35	2.9	1.7	30.7	0.304	25	203.78	33	2	0	0	0	0.41664	1.14576
5	2	11.09	150	1083.1	1087.6	1085.35	2.9	1.7	30.7	0.304	25	203.78	33	2	0	0	0	0.41664	1.34158
6	2	11.09	150	1083.1	1087.6	1085.35	2.9	1.7	30.7	0.304	25	203.78	33	2	0	0	0	0.41664	1.24992
7	2	11.09	150	1083.1	1087.6	1085.35	2.9	1.7	30.7	0.304	25	203.78	33	2	0	0	0	0.41664	1.28742
8	2	11.09	150	1083.1	1087.6	1085.35	2.9	1.7	30.7	0.304	25	203.78	33	2	0	0	0	0.41664	0.908275
9	2	11.09	150	1083.1	1087.6	1085.35	2.9	1.7	30.7	0.304	25	203.78	33	2	0	0	0	0.41664	0.804115
10	2	11.09	150	1083.1	1087.6	1085.35	2.9	1.7	30.7	0.304	25	203.78	33	2	0	0	0	0.41664	0.829113
11	2	11.09	150	1083.1	1087.6	1085.35	2.9	1.7	30.7	0.304	25	203.78	33	2	0	0	0	0.41664	0.649958
12	2	11.09	150	1083.1	1087.6	1085.35	2.9	1.7	30.7	0.304	25	203.78	33	2	0	0	0	0.41664	0.662457
1	2	10.13	150	992.9	997.4	995.15	3.6	3.2	31.9	0.508	26	176.98	29	2	0	0	0	0.855309	0.436208
2	2	10.13	150	992.9	997.4	995.15	3.6	3.2	31.9	0.508	26	176.98	29	2	0	0	0	0.855309	1.52245
3	2	10.13	150	992.9	997.4	995.15	3.6	3.2	31.9	0.508	26	176.98	29	2	0	0	0	0.855309	1.50534
4	2	10.13	150	992.9	997.4	995.15	3.6	3.2	31.9	0.508	26	176.98	29	2	0	0	0	0.855309	1.1119
5	2	10.13	150	992.9	997.4	995.15	3.6	3.2	31.9	0.508	26	176.98	29	2	0	0	0	0.855309	0.735566
6	2	10.13	150	992.9	997.4	995.15	3.6	3.2	31.9	0.508	26	176.98	29	2	0	0	0	0.855309	0.598716
7	2	10.13	150	992.9	997.4	995.15	3.6	3.2	31.9	0.508	26	176.98	29	2	0	0	0	0.855309	0.35923
8	2	10.13	150	992.9	997.4	995.15	3.6	3.2	31.9	0.508	26	176.98	29	2	0	0	0	0.855309	0.555951
9	2	10.13	150	992.9	997.4	995.15	3.6	3.2	31.9	0.508	26	176.98	29	2	0	0	0	0.855309	0.615822
1	2	9.56	150	952.4	970.8	961.6	12	7.9	31.6	0.859	20	235.5	39	2	0	0	0	1	2.12
2	2	9.56	150	952.4	970.8	961.6	12	7.9	31.6	0.859	20	235.5	39	2	0	0	0	1	1.96
3	2	9.56	150	952.4	970.8	961.6	12	7.9	31.6	0.859	20	235.5	39	2	0	0	0	1	1.29
4	2	9.56	150	952.4	970.8	961.6	12	7.9	31.6	0.859	20	235.5	39	2	0	0	0	1	1.87
5	2	9.56	150	952.4	970.8	961.6	12	7.9	31.6	0.859	20	235.5	39	2	0	0	0	1	1.52
6	2	9.56	150	952.4	970.8	961.6	12	7.9	31.6	0.859	20	235.5	39	2	0	0	0	1	1.38
7	2	9.56	150	952.4	970.8	961.6	12	7.9	31.6	0.859	20	235.5	39	2	0	0	0	1	1.24
8	2	9.56	150	952.4	970.8	961.6	12	7.9	31.6	0.859	20	235.5	39	2	0	0	0	1	1.63
9	2	9.56	150	952.4	970.8	961.6	12	7.9	31.6	0.859	20	235.5	39	2	0	0	0	1	1.05
10	2	9.56	150	952.4	970.8	961.6	12	7.9	31.6	0.859	20	235.5	39	2	0	0	0	1	0.46
11	2	9.56	150	952.4	970.8	961.6	12	7.9	31.6	0.859	20	235.5	39	2	0	0	0	1	0.46
1	2	10.24	150	1070.1	1076.2	1073.15	3.3	0.6	27.7	0.161	28	179.04	29	2	0.0111184	2.43029	99.5446	0.092653	0.217735
2	2	10.24	150	1070.1	1076.2	1073.15	3.3	0.6	27.7	0.161	28	179.04	29	2	0.0111184	2.43029	99.5446	0.092653	0.102845
3	2	10.24	150	1070.1	1076.2	1073.15	3.3	0.6	27.7	0.161	28	179.04	29	2	0.0111184	2.43029	99.5446	0.092653	0.061151
4	2	10.24	150	1070.1	1076.2	1073.15	3.3	0.6	27.7	0.161	28	179.04	29	2	0.0111184	2.43029	99.5446	0.092653	0.0565183
5	2	10.24	150	1070.1	1076.2	1073.15	3.3	0.6	27.7	0.161	28	179.04	29	2	0.0111184	2.43029	99.5446	0.092653	0.0528122
6	2	10.24	150	1070.1	1076.2	1073.15	3.3	0.6	27.7	0.161	28	179.04	29	2	0.0111184	2.43029	99.5446	0.092653	0.031502
7	2	10.24	150	1070.1	1076.2	1073.15	3.3	0.6	27.7	0.161	28	179.04	29	2	0.0111184	2.43029	99.5446	0.092653	0.029649
8	2	10.24	150	1070.1	1076.2	1073.15	3.3	0.6	27.7	0.161	28	179.04	29	2	0.0111184	2.43029	99.5446	0.092653	0.0481796
9	2	10.24	150	1070.1	1076.2	1073.15	3.3	0.6	27.7	0.161	28	179.04	29	2	0.0111184	2.43029	99.5446	0.092653	0.0491061
10	2	10.24	150	1070.1	1076.2	1073.15	3.3	0.6	27.7	0.161	28	179.04	29	2	0.0111184	2.43029	99.5446	0.092653	0.0324285
11	2	10.24	150	1070.1	1076.2	1073.15	3.3	0.6	27.7	0.161	28	179.04	29	2	0.0111184	2.43029	99.5446	0.092653	0.0537387
12	2	10.24	150	1070.1	1076.2	1073.15	3.3	0.6	27.7	0.161	28	179.04	29	2	0.0111184	2.43029	99.5446	0.092653	0.0426204
1	2	10.24	150	1094.2	1097.4	1095.8	1.8	0.9	28.4	0.201	32	142.26	23	2	0.020821	4.55113	99.5446	0.173509	0.407745
2	2	10.24	150	1094.2	1097.4	1095.8	1.8	0.9	28.4	0.201	32	142.26	23	2	0.020821	4.55113	99.5446	0.173509	0.192594
3	2	10.24	150	1094.2	1097.4	1095.8	1.8	0.9	28.4	0.201	32	142.26	23	2	0.020821	4.55113	99.5446	0.173509	0.114516
4	2	10.24	150	1094.2	1097.4	1095.8	1.8	0.9	28.4	0.201	32	142.26	23	2	0.020821	4.55113	99.5446	0.173509	0.10584
5	2	10.24	150	1094.2	1097.4	1095.8	1.8	0.9	28.4	0.201	32	142.26	23	2	0.020821	4.55113	99.5446	0.173509	0.0988999
6	2	10.24	150	1094.2	1097.4	1095.8	1.8	0.9	28.4	0.201	32	142.26	23	2	0.020821	4.55113	99.5446	0.173509	0.0589929
7	2	10.24	150	1094.2	1097.4	1095.8	1.8	0.9	28.4	0.201	32	142.26	23	2	0.020821	4.55113	99.5446	0.173509	0.0555227
8	2	10.24	150	1094.2	1097.4	1095.8	1.8	0.9	28.4	0.201	32	142.26	23	2	0.020821	4.55113	99.5446	0.173509	0.0902244
9	2	10.24	150	1094.2	1097.4	1095.8	1.8	0.9	28.4	0.201	32	142.26	23	2	0.020821	4.55113	99.5446	0.173509	0.0919595
10	2	10.24	150	1094.2	1097.4	1095.8	1.8	0.9	28.4	0.201	32	142.26	23	2	0.020821	4.55113	99.5446	0.173509	0.060728
11	2	10.24	150	1094.2	1097.4	1095.8	1.8	0.9	28.4	0.201	32	142.26	23	2	0.020821	4.55113	99.5446	0.173509	0.100635
12	2	10.24	150	1094.2	1097.4	1095.8	1.8	0.9	28.4	0.201	32	142.26	23	2	0.020821	4.55113	99.5446	0.173509	0.0798139
1	2	10.13	150	962.4	968.9	965.65	6	4.5	31.6	0.619	30	118.62	19	2	0.184867	7.34368	97.5445	0.637473	0.509978
2	2	10.13	150	962.4	968.9	965.65	6	4.5	31.6	0.619	30	118.62	19	2	0.184867	7.34368	97.5445	0.637473	0.433481
3	2	10.13	150	962.4	968.9	965.65	6	4.5	31.6	0.619	30	118.62	19	2	0.184867	7.34368	97.5445	0.637473	0.344235
4	2	10.13	150	962.4	968.9	965.65	6	4.5	31.6	0.619	30	118.62	19	2	0.184867	7.34368	97.5445	0.637473	0.299612
5	2	10.13	150	962.4	968.9	965.65	6	4.5	31.6	0.619	30	118.62	19	2	0.184867	7.34368	97.5445	0.637473	0.191242
6	2	10.13	150	962.4	968.9	965.65	6	4.5	31.6	0.619	30	118.62	19	2	0.184867	7.34368	97.5445	0.637473	0.369734
7	2	10.13	150	962.4	968.9	965.65	6	4.5	31.6	0.619	30	118.62	19	2	0.184867	7.34368	97.5445	0.637473	0.172118
8	2	10.13	150	962.4	968.9	965.65	6	4.5	31.6	0.619	30	118.62	19	2	0.184867	7.34368	97.5445	0.637473	0.0892462
9	2	10.13	150	962.4	968.9	965.65	6	4.5	31.6	0.619	30	118.62	19	2	0.184867	7.34368	97.5445	0.637473	0.0191242
10	2	10.13	150	962.4	968.9	965.65	6	4.5	31.6	0.619	30	118.62	19	2	0.184867	7.34368	97.5445	0.637473	0.0509978
11	2	10.13	150	962.4	968.9	965.65	6	4.5	31.6	0.619	30	118.62	19	2	0.184867	7.34368	97.5445	0.637473	0.0764967
12	2	10.13	150	962.4	968.9	965.65	6	4.5	31.6	0.619	30	118.62	19	2	0.184867	7.34368	97.5445	0.637473	0.114745
1	2	10.08	150	962.9	969.2	966.05	5.9	4.5	31.7	0.582	24	118.92	19	2	2.12801	14.7721	87.4083	0.516507	1.45655
2	2	10.08	150	962.9	969.2	966.05	5.9	4.5	31.7	0.582	24	118.92	19	2	2.12801	14.7721	87.4083	0.516507	1.90591
3	2	10.08	150	962.9	969.2	966.05	5.9	4.5	31.7	0.582	24	118.92	19	2	2.12801	14.7721	87.4083	0.516507	2.67034
4	2	10.08	150	962.9	969.2	966.05	5.9	4.5	31.7	0.582	24	118.92	19	2	2.12801	14.7721	87.4083	0.516507	2.78914
5	2	10.08	150	962.9	969.2	966.05	5.9	4.5	31.7	0.582	24	118.92	19	2	2.12801	14.7721	87.4083	0.516507	1.98339
6	2	10.08	150	962.9	969.2	966.05	5.9	4.5	31.7	0.582	24	118.92	19	2	2.12801	14.7721	87.4083	0.516507	1.88525
7	2	10.08	150	962.9	969.2	966.05	5.9	4.5	31.7	0.582	24	118.92	19	2	2.12801	14.7721	87.4083	0.516507	1.64766
8	2	10.08	150	962.9	969.2	966.05	5.9	4.5	31.7	0.582	24	118.92	19	2	2.12801	14.7721	87.4083	0.516507	2.47407
9	2	10.08	150	962.9	969.2	966.05	5.9	4.5	31.7	0.582	24	118.92	19	2	2.12801	14.7721	87.4083	0.516507	2.21065
10	2	10.08	150	962.9	969.2	966.05	5.9	4.5	31.7	0.582	24	118.92	19	2	2.12801	14.7721	87.4083	0.516507	0.888392
11	2	10.08	150	962.9	969.2	966.05	5.9	4.5	31.7	0.582	24	118.92	19	2	2.12801	14.7721	87.4083	0.516507	0.247923
12	2	10.08	150	962.9	969.2	966.05	5.9	4.5	31.7	0.582	24	118.92	19	2	2.12801	14.7721	87.4083	0.516507	0.242758
1	2	9.86	175	957.1	964	960.55	5.7	4	30.8	1.027	40	180.4	29	2	1.06751	18.4726	94.5368	0.580169	1.19515
2	2	9.86	175	957.1	964	960.55	5.7	4	30.8	1.027	40	180.4	29	2	1.06751	18.4726	94.5368	0.580169	1.48523
3	2	9.86	175	957.1	964	960.55	5.7	4	30.8	1.027	40	180.4	29	2	1.06751	18.4726	94.5368	0.580169	1.46202
4	2	9.86	175	957.1	964	960.55	5.7	4	30.8	1.027	40	180.4	29	2	1.06751	18.4726	94.5368	0.580169	1.46202
5	2	9.86	175	957.1	964	960.55	5.7	4	30.8	1.027	40	180.4	29	2	1.06751	18.4726	94.5368	0.580169	1.45622
6	2	9.86	175	957.1	964	960.55	5.7	4	30.8	1.027	40	180.4	29	2	1.06751	18.4726	94.5368	0.580169	1.0443
7	2	9.86	175	957.1	964	960.55	5.7	4	30.8	1.027	40	180.4	29	2	1.06751	18.4726	94.5368	0.580169	0.754219
8	2	9.86	175	957.1	964	960.55	5.7	4	30.8	1.027	40	180.4	29	2	1.06751	18.4726	94.5368	0.580169	0.527953
1	2	9.86	175	965.6	973	969.3	6.8	3.6	29.1	0.561	26	225.56	37	2	0.524816	9.0816	94.5368	0.285226	0.587566
2	2	9.86	175	965.6	973	969.3	6.8	3.6	29.1	0.561	26	225.56	37	2	0.524816	9.0816	94.5368	0.285226	0.730179
3	2	9.86	175	965.6	973	969.3	6.8	3.6	29.1	0.561	26	225.56	37	2	0.524816	9.0816	94.5368	0.285226	0.71877
4	2	9.86	175	965.6	973	969.3	6.8	3.6	29.1	0.561	26	225.56	37	2	0.524816	9.0816	94.5368	0.285226	0.71877
5	2	9.86	175	965.6	973	969.3	6.8	3.6	29.1	0.561	26	225.56	37	2	0.524816	9.0816	94.5368	0.285226	0.715917
6	2	9.86	175	965.6	973	969.3	6.8	3.6	29.1	0.561	26	225.56	37	2	0.524816	9.0816	94.5368	0.285226	0.513407
7	2	9.86	175	965.6	973	969.3	6.8	3.6	29.1	0.561	26	225.56	37	2	0.524816	9.0816	94.5368	0.285226	0.370794
8	2	9.86	175	965.6	973	969.3	6.8	3.6	29.1	0.561	26	225.56	37	2	0.524816	9.0816	94.5368	0.285226	0.259556
1	2	8.68	175	941.3	949.1	945.2	6.9	6.3	29.9	0.807	30	177.92	29	2	0.829466	13.7153	94.2971	0.528322	0.898148
2	2	8.68	175	941.3	949.1	945.2	6.9	6.3	29.9	0.807	30	177.92	29	2	0.829466	13.7153	94.2971	0.528322	0.713235
3	2	8.68	175	941.3	949.1	945.2	6.9	6.3	29.9	0.807	30	177.92	29	2	0.829466	13.7153	94.2971	0.528322	0.739651
4	2	8.68	175	941.3	949.1	945.2	6.9	6.3	29.9	0.807	30	177.92	29	2	0.829466	13.7153	94.2971	0.528322	0.924564
5	2	8.68	175	941.3	949.1	945.2	6.9	6.3	29.9	0.807	30	177.92	29	2	0.829466	13.7153	94.2971	0.528322	1.48459
6	2	8.68	175	941.3	949.1	945.2	6.9	6.3	29.9	0.807	30	177.92	29	2	0.829466	13.7153	94.2971	0.528322	1.36836
7	2	8.68	175	941.3	949.1	945.2	6.9	6.3	29.9	0.807	30	177.92	29	2	0.829466	13.7153	94.2971	0.528322	1.15703
8	2	8.68	175	941.3	949.1	945.2	6.9	6.3	29.9	0.807	30	177.92	29	2	0.829466	13.7153	94.2971	0.528322	1.15703
9	2	8.68	175	941.3	949.1	945.2	6.9	6.3	29.9	0.807	30	177.92	29	2	0.829466	13.7153	94.2971	0.528322	1.35779
10	2	8.68	175	941.3	949.1	945.2	6.9	6.3	29.9	0.807	30	177.92	29	2	0.829466	13.7153	94.2971	0.528322	1.34194
11	2	8.68	175	941.3	949.1	945.2	6.9	6.3	29.9	0.807	30	177.92	29	2	0.829466	13.7153	94.2971	0.528322	1.52685
12	2	8.68	175	941.3	949.1	945.2	6.9	6.3	29.9	0.807	30	177.92	29	2	0.829466	13.7153	94.2971	0.528322	1.83856
1	2	8.68	175	959.8	965.6	962.7	3.8	1	30.3	1.2	31	178.48	29	2	0.195779	3.23721	94.2971	0.1247	0.21199
2	2	8.68	175	959.8	965.6	962.7	3.8	1	30.3	1.2	31	178.48	29	2	0.195779	3.23721	94.2971	0.1247	0.168345
3	2	8.68	175	959.8	965.6	962.7	3.8	1	30.3	1.2	31	178.48	29	2	0.195779	3.23721	94.2971	0.1247	0.17458
4	2	8.68	175	959.8	965.6	962.7	3.8	1	30.3	1.2	31	178.48	29	2	0.195779	3.23721	94.2971	0.1247	0.218225
5	2	8.68	175	959.8	965.6	962.7	3.8	1	30.3	1.2	31	178.48	29	2	0.195779	3.23721	94.2971	0.1247	0.350407
6	2	8.68	175	959.8	965.6	962.7	3.8	1	30.3	1.2	31	178.48	29	2	0.195779	3.23721	94.2971	0.1247	0.322973
7	2	8.68	175	959.8	965.6	962.7	3.8	1	30.3	1.2	31	178.48	29	2	0.195779	3.23721	94.2971	0.1247	0.273093
8	2	8.68	175	959.8	965.6	962.7	3.8	1	30.3	1.2	31	178.48	29	2	0.195779	3.23721	94.2971	0.1247	0.273093
9	2	8.68	175	959.8	965.6	962.7	3.8	1	30.3	1.2	31	178.48	29	2	0.195779	3.23721	94.2971	0.1247	0.320479
10	2	8.68	175	959.8	965.6	962.7	3.8	1	30.3	1.2	31	178.48	29	2	0.195779	3.23721	94.2971	0.1247	0.316738
11	2	8.68	175	959.8	965.6	962.7	3.8	1	30.3	1.2	31	178.48	29	2	0.195779	3.23721	94.2971	0.1247	0.360383
12	2	8.68	175	959.8	965.6	962.7	3.8	1	30.3	1.2	31	178.48	29	2	0.195779	3.23721	94.2971	0.1247	0.433956
1	2	9.31	125	938.1	943.7	940.9	4.9	1.6	30.2	0.41	25	108.76	17	2	0.179006	1.54514	89.6177	0.069382	0.17623
2	2	9.31	125	938.1	943.7	940.9	4.9	1.6	30.2	0.41	25	108.76	17	2	0.179006	1.54514	89.6177	0.069382	0.21439
3	2	9.31	125	938.1	943.7	940.9	4.9	1.6	30.2	0.41	25	108.76	17	2	0.179006	1.54514	89.6177	0.069382	0.206758
4	2	9.31	125	938.1	943.7	940.9	4.9	1.6	30.2	0.41	25	108.76	17	2	0.179006	1.54514	89.6177	0.069382	0.228961
5	2	9.31	125	938.1	943.7	940.9	4.9	1.6	30.2	0.41	25	108.76	17	2	0.179006	1.54514	89.6177	0.069382	0.185944
6	2	9.31	125	938.1	943.7	940.9	4.9	1.6	30.2	0.41	25	108.76	17	2	0.179006	1.54514	89.6177	0.069382	0.111011
7	2	9.31	125	938.1	943.7	940.9	4.9	1.6	30.2	0.41	25	108.76	17	2	0.179006	1.54514	89.6177	0.069382	0.13807
8	2	9.31	125	938.1	943.7	940.9	4.9	1.6	30.2	0.41	25	108.76	17	2	0.179006	1.54514	89.6177	0.069382	0.0985225
1	2	9.31	125	954.9	959.9	957.4	4	1.8	32.6	0.96	18	106.42	17	2	0.471527	4.07012	89.6177	0.182762	0.464216
2	2	9.31	125	954.9	959.9	957.4	4	1.8	32.6	0.96	18	106.42	17	2	0.471527	4.07012	89.6177	0.182762	0.564736
3	2	9.31	125	954.9	959.9	957.4	4	1.8	32.6	0.96	18	106.42	17	2	0.471527	4.07012	89.6177	0.182762	0.544632
4	2	9.31	125	954.9	959.9	957.4	4	1.8	32.6	0.96	18	106.42	17	2	0.471527	4.07012	89.6177	0.182762	0.603116
5	2	9.31	125	954.9	959.9	957.4	4	1.8	32.6	0.96	18	106.42	17	2	0.471527	4.07012	89.6177	0.182762	0.489803
6	2	9.31	125	954.9	959.9	957.4	4	1.8	32.6	0.96	18	106.42	17	2	0.471527	4.07012	89.6177	0.182762	0.29242
7	2	9.31	125	954.9	959.9	957.4	4	1.8	32.6	0.96	18	106.42	17	2	0.471527	4.07012	89.6177	0.182762	0.363697
8	2	9.31	125	954.9	959.9	957.4	4	1.8	32.6	0.96	18	106.42	17	2	0.471527	4.07012	89.6177	0.182762	0.259523
1	2	9.31	125	961.4	971.5	966.45	6.2	2.9	29.5	0.949	20	106.32	17	2	0.750978	6.48228	89.6177	0.291077	0.739335
2	2	9.31	125	961.4	971.5	966.45	6.2	2.9	29.5	0.949	20	106.32	17	2	0.750978	6.48228	89.6177	0.291077	0.899427
3	2	9.31	125	961.4	971.5	966.45	6.2	2.9	29.5	0.949	20	106.32	17	2	0.750978	6.48228	89.6177	0.291077	0.867408
4	2	9.31	125	961.4	971.5	966.45	6.2	2.9	29.5	0.949	20	106.32	17	2	0.750978	6.48228	89.6177	0.291077	0.960553
5	2	9.31	125	961.4	971.5	966.45	6.2	2.9	29.5	0.949	20	106.32	17	2	0.750978	6.48228	89.6177	0.291077	0.780085
6	2	9.31	125	961.4	971.5	966.45	6.2	2.9	29.5	0.949	20	106.32	17	2	0.750978	6.48228	89.6177	0.291077	0.465723
7	2	9.31	125	961.4	971.5	966.45	6.2	2.9	29.5	0.949	20	106.32	17	2	0.750978	6.48228	89.6177	0.291077	0.579242
8	2	9.31	125	961.4	971.5	966.45	6.2	2.9	29.5	0.949	20	106.32	17	2	0.750978	6.48228	89.6177	0.291077	0.413329
1	2	9.31	125	973.1	977.6	975.35	2.9	0.5	29.6	0.189	23	106.32	17	2	0.0257866	0.222585	89.6177	0.00999482	0.0253868
2	2	9.31	125	973.1	977.6	975.35	2.9	0.5	29.6	0.189	23	106.32	17	2	0.0257866	0.222585	89.6177	0.00999482	0.030884
3	2	9.31	125	973.1	977.6	975.35	2.9	0.5	29.6	0.189	23	106.32	17	2	0.0257866	0.222585	89.6177	0.00999482	0.0297846
4	2	9.31	125	973.1	977.6	975.35	2.9	0.5	29.6	0.189	23	106.32	17	2	0.0257866	0.222585	89.6177	0.00999482	0.0329829
5	2	9.31	125	973.1	977.6	975.35	2.9	0.5	29.6	0.189	23	106.32	17	2	0.0257866	0.222585	89.6177	0.00999482	0.0267861
6	2	9.31	125	973.1	977.6	975.35	2.9	0.5	29.6	0.189	23	106.32	17	2	0.0257866	0.222585	89.6177	0.00999482	0.0159917
7	2	9.31	125	973.1	977.6	975.35	2.9	0.5	29.6	0.189	23	106.32	17	2	0.0257866	0.222585	89.6177	0.00999482	0.0198897
8	2	9.31	125	973.1	977.6	975.35	2.9	0.5	29.6	0.189	23	106.32	17	2	0.0257866	0.222585	89.6177	0.00999482	0.0141926
1	2	7.92	125	935.7	940.1	937.9	1.8	0.6	31	0.465	28	145.65	23	2	0.0522146	0.794822	93.8356	0.0483468	0.297333
2	2	7.92	125	935.7	940.1	937.9	1.8	0.6	31	0.465	28	145.65	23	2	0.0522146	0.794822	93.8356	0.0483468	0.210309
3	2	7.92	125	935.7	940.1	937.9	1.8	0.6	31	0.465	28	145.65	23	2	0.0522146	0.794822	93.8356	0.0483468	0.200156
4	2	7.92	125	935.7	940.1	937.9	1.8	0.6	31	0.465	28	145.65	23	2	0.0522146	0.794822	93.8356	0.0483468	0.313771
5	2	7.92	125	935.7	940.1	937.9	1.8	0.6	31	0.465	28	145.65	23	2	0.0522146	0.794822	93.8356	0.0483468	0.303618
6	2	7.92	125	935.7	940.1	937.9	1.8	0.6	31	0.465	28	145.65	23	2	0.0522146	0.794822	93.8356	0.0483468	0.254304
7	2	7.92	125	935.7	940.1	937.9	1.8	0.6	31	0.465	28	145.65	23	2	0.0522146	0.794822	93.8356	0.0483468	0.296366
8	2	7.92	125	935.7	940.1	937.9	1.8	0.6	31	0.465	28	145.65	23	2	0.0522146	0.794822	93.8356	0.0483468	0.255271
9	2	7.92	125	935.7	940.1	937.9	1.8	0.6	31	0.465	28	145.65	23	2	0.0522146	0.794822	93.8356	0.0483468	0.242701
10	2	7.92	125	935.7	940.1	937.9	1.8	0.6	31	0.465	28	145.65	23	2	0.0522146	0.794822	93.8356	0.0483468	0.24947
11	2	7.92	125	935.7	940.1	937.9	1.8	0.6	31	0.465	28	145.65	23	2	0.0522146	0.794822	93.8356	0.0483468	0.207408
12	2	7.92	125	935.7	940.1	937.9	1.8	0.6	31	0.465	28	145.65	23	2	0.0522146	0.794822	93.8356	0.0483468	0.139239
1	2	7.92	125	948.2	956.9	952.55	6.2	1.7	31.4	0.788	23	142.97	23	2	0.250705	3.81629	93.8356	0.232134	1.42763
2	2	7.92	125	948.2	956.9	952.55	6.2	1.7	31.4	0.788	23	142.97	23	2	0.250705	3.81629	93.8356	0.232134	1.00978
3	2	7.92	125	948.2	956.9	952.55	6.2	1.7	31.4	0.788	23	142.97	23	2	0.250705	3.81629	93.8356	0.232134	0.961036
4	2	7.92	125	948.2	956.9	952.55	6.2	1.7	31.4	0.788	23	142.97	23	2	0.250705	3.81629	93.8356	0.232134	1.50655
5	2	7.92	125	948.2	956.9	952.55	6.2	1.7	31.4	0.788	23	142.97	23	2	0.250705	3.81629	93.8356	0.232134	1.4578
6	2	7.92	125	948.2	956.9	952.55	6.2	1.7	31.4	0.788	23	142.97	23	2	0.250705	3.81629	93.8356	0.232134	1.22103
7	2	7.92	125	948.2	956.9	952.55	6.2	1.7	31.4	0.788	23	142.97	23	2	0.250705	3.81629	93.8356	0.232134	1.42298
8	2	7.92	125	948.2	956.9	952.55	6.2	1.7	31.4	0.788	23	142.97	23	2	0.250705	3.81629	93.8356	0.232134	1.22567
9	2	7.92	125	948.2	956.9	952.55	6.2	1.7	31.4	0.788	23	142.97	23	2	0.250705	3.81629	93.8356	0.232134	1.16531
10	2	7.92	125	948.2	956.9	952.55	6.2	1.7	31.4	0.788	23	142.97	23	2	0.250705	3.81629	93.8356	0.232134	1.19781
11	2	7.92	125	948.2	956.9	952.55	6.2	1.7	31.4	0.788	23	142.97	23	2	0.250705	3.81629	93.8356	0.232134	0.995856
12	2	7.92	125	948.2	956.9	952.55	6.2	1.7	31.4	0.788	23	142.97	23	2	0.250705	3.81629	93.8356	0.232134	0.668546
1	2	7.92	125	965.4	968.2	966.8	2	1.1	29.6	0.14	27	143.8	23	2	0.028821	0.438719	93.8356	0.0266861	0.164119
2	2	7.92	125	965.4	968.2	966.8	2	1.1	29.6	0.14	27	143.8	23	2	0.028821	0.438719	93.8356	0.0266861	0.116084
3	2	7.92	125	965.4	968.2	966.8	2	1.1	29.6	0.14	27	143.8	23	2	0.028821	0.438719	93.8356	0.0266861	0.11048
4	2	7.92	125	965.4	968.2	966.8	2	1.1	29.6	0.14	27	143.8	23	2	0.028821	0.438719	93.8356	0.0266861	0.173193
5	2	7.92	125	965.4	968.2	966.8	2	1.1	29.6	0.14	27	143.8	23	2	0.028821	0.438719	93.8356	0.0266861	0.167589
6	2	7.92	125	965.4	968.2	966.8	2	1.1	29.6	0.14	27	143.8	23	2	0.028821	0.438719	93.8356	0.0266861	0.140369
7	2	7.92	125	965.4	968.2	966.8	2	1.1	29.6	0.14	27	143.8	23	2	0.028821	0.438719	93.8356	0.0266861	0.163586
8	2	7.92	125	965.4	968.2	966.8	2	1.1	29.6	0.14	27	143.8	23	2	0.028821	0.438719	93.8356	0.0266861	0.140902
9	2	7.92	125	965.4	968.2	966.8	2	1.1	29.6	0.14	27	143.8	23	2	0.028821	0.438719	93.8356	0.0266861	0.133964
10	2	7.92	125	965.4	968.2	966.8	2	1.1	29.6	0.14	27	143.8	23	2	0.028821	0.438719	93.8356	0.0266861	0.1377
11	2	7.92	125	965.4	968.2	966.8	2	1.1	29.6	0.14	27	143.8	23	2	0.028821	0.438719	93.8356	0.0266861	0.114483
12	2	7.92	125	965.4	968.2	966.8	2	1.1	29.6	0.14	27	143.8	23	2	0.028821	0.438719	93.8356	0.0266861	0.0768559
1	2	9.56	150	959.6	965	962.3	4.2	0.7	28.4	0.208	30	226.92	37	2	0.0418828	1.79906	97.7249	0.0951883	0.187521
2	2	9.56	150	959.6	965	962.3	4.2	0.7	28.4	0.208	30	226.92	37	2	0.0418828	1.79906	97.7249	0.0951883	0.175146
3	2	9.56	150	959.6	965	962.3	4.2	0.7	28.4	0.208	30	226.92	37	2	0.0418828	1.79906	97.7249	0.0951883	0.135167
4	2	9.56	150	959.6	965	962.3	4.2	0.7	28.4	0.208	30	226.92	37	2	0.0418828	1.79906	97.7249	0.0951883	0.155157
5	2	9.56	150	959.6	965	962.3	4.2	0.7	28.4	0.208	30	226.92	37	2	0.0418828	1.79906	97.7249	0.0951883	0.0780544
6	2	9.56	150	959.6	965	962.3	4.2	0.7	28.4	0.208	30	226.92	37	2	0.0418828	1.79906	97.7249	0.0951883	0.0542573
7	2	9.56	150	959.6	965	962.3	4.2	0.7	28.4	0.208	30	226.92	37	2	0.0418828	1.79906	97.7249	0.0951883	0.0790063
8	2	9.56	150	959.6	965	962.3	4.2	0.7	28.4	0.208	30	226.92	37	2	0.0418828	1.79906	97.7249	0.0951883	0.0799582
9	2	9.56	150	959.6	965	962.3	4.2	0.7	28.4	0.208	30	226.92	37	2	0.0418828	1.79906	97.7249	0.0951883	0.0742469
10	2	9.56	150	959.6	965	962.3	4.2	0.7	28.4	0.208	30	226.92	37	2	0.0418828	1.79906	97.7249	0.0951883	0.0704393
11	2	9.56	150	959.6	965	962.3	4.2	0.7	28.4	0.208	30	226.92	37	2	0.0418828	1.79906	97.7249	0.0951883	0.073295
12	2	9.56	150	959.6	965	962.3	4.2	0.7	28.4	0.208	30	226.92	37	2	0.0418828	1.79906	97.7249	0.0951883	0.0418828
1	2	13.7	175	960.6	968.5	964.55	5.5	2.9	30.3	0.82	40	178.8	29	2	0.42136	27.3041	98.4802	0.766108	0.750786
2	2	13.7	175	960.6	968.5	964.55	5.5	2.9	30.3	0.82	40	178.8	29	2	0.42136	27.3041	98.4802	0.766108	0.896347
3	2	13.7	175	960.6	968.5	964.55	5.5	2.9	30.3	0.82	40	178.8	29	2	0.42136	27.3041	98.4802	0.766108	1.15682
4	2	13.7	175	960.6	968.5	964.55	5.5	2.9	30.3	0.82	40	178.8	29	2	0.42136	27.3041	98.4802	0.766108	1.60117
5	2	13.7	175	960.6	968.5	964.55	5.5	2.9	30.3	0.82	40	178.8	29	2	0.42136	27.3041	98.4802	0.766108	2.59711
6	2	13.7	175	960.6	968.5	964.55	5.5	2.9	30.3	0.82	40	178.8	29	2	0.42136	27.3041	98.4802	0.766108	2.7963
7	2	13.7	175	960.6	968.5	964.55	5.5	2.9	30.3	0.82	40	178.8	29	2	0.42136	27.3041	98.4802	0.766108	3.30959
8	2	13.7	175	960.6	968.5	964.55	5.5	2.9	30.3	0.82	40	178.8	29	2	0.42136	27.3041	98.4802	0.766108	3.07976
9	2	13.7	175	960.6	968.5	964.55	5.5	2.9	30.3	0.82	40	178.8	29	2	0.42136	27.3041	98.4802	0.766108	3.9378
10	2	13.7	175	960.6	968.5	964.55	5.5	2.9	30.3	0.82	40	178.8	29	2	0.42136	27.3041	98.4802	0.766108	4.02973
11	2	13.7	175	960.6	968.5	964.55	5.5	2.9	30.3	0.82	40	178.8	29	2	0.42136	27.3041	98.4802	0.766108	4.08336
12	2	13.7	175	960.6	968.5	964.55	5.5	2.9	30.3	0.82	40	178.8	29	2	0.42136	27.3041	98.4802	0.766108	3.75393
1	2	13.7	175	981.2	989.3	985.25	7.2	3.3	30.3	0.22	29	179.54	229	2	0.12864	8.3359	98.4802	0.233892	0.229214
2	2	13.7	175	981.2	989.3	985.25	7.2	3.3	30.3	0.22	29	179.54	229	2	0.12864	8.3359	98.4802	0.233892	0.273653
3	2	13.7	175	981.2	989.3	985.25	7.2	3.3	30.3	0.22	29	179.54	229	2	0.12864	8.3359	98.4802	0.233892	0.353177
4	2	13.7	175	981.2	989.3	985.25	7.2	3.3	30.3	0.22	29	179.54	229	2	0.12864	8.3359	98.4802	0.233892	0.488834
5	2	13.7	175	981.2	989.3	985.25	7.2	3.3	30.3	0.22	29	179.54	229	2	0.12864	8.3359	98.4802	0.233892	0.792893
6	2	13.7	175	981.2	989.3	985.25	7.2	3.3	30.3	0.22	29	179.54	229	2	0.12864	8.3359	98.4802	0.233892	0.853705
7	2	13.7	175	981.2	989.3	985.25	7.2	3.3	30.3	0.22	29	179.54	229	2	0.12864	8.3359	98.4802	0.233892	1.01041
8	2	13.7	175	981.2	989.3	985.25	7.2	3.3	30.3	0.22	29	179.54	229	2	0.12864	8.3359	98.4802	0.233892	0.940245
9	2	13.7	175	981.2	989.3	985.25	7.2	3.3	30.3	0.22	29	179.54	229	2	0.12864	8.3359	98.4802	0.233892	1.2022
10	2	13.7	175	981.2	989.3	985.25	7.2	3.3	30.3	0.22	29	179.54	229	2	0.12864	8.3359	98.4802	0.233892	1.23027
11	2	13.7	175	981.2	989.3	985.25	7.2	3.3	30.3	0.22	29	179.54	229	2	0.12864	8.3359	98.4802	0.233892	1.24664
12	2	13.7	175	981.2	989.3	985.25	7.2	3.3	30.3	0.22	29	179.54	229	2	0.12864	8.3359	98.4802	0.233892	1.14607
1	2	8.09	150	919	925.3	922.15	5.4	1.3	31	0.365	30	141.14	23	2	0.596236	12.4795	95.4401	0.518466	0.264418
2	2	8.09	150	919	925.3	922.15	5.4	1.3	31	0.365	30	141.14	23	2	0.596236	12.4795	95.4401	0.518466	0.575497
3	2	8.09	150	919	925.3	922.15	5.4	1.3	31	0.365	30	141.14	23	2	0.596236	12.4795	95.4401	0.518466	0.674006
4	2	8.09	150	919	925.3	922.15	5.4	1.3	31	0.365	30	141.14	23	2	0.596236	12.4795	95.4401	0.518466	0.871023
5	2	8.09	150	919	925.3	922.15	5.4	1.3	31	0.365	30	141.14	23	2	0.596236	12.4795	95.4401	0.518466	0.907315
6	2	8.09	150	919	925.3	922.15	5.4	1.3	31	0.365	30	141.14	23	2	0.596236	12.4795	95.4401	0.518466	1.00582
7	2	8.09	150	919	925.3	922.15	5.4	1.3	31	0.365	30	141.14	23	2	0.596236	12.4795	95.4401	0.518466	0.632528
8	2	8.09	150	919	925.3	922.15	5.4	1.3	31	0.365	30	141.14	23	2	0.596236	12.4795	95.4401	0.518466	0.865838
9	2	8.09	150	919	925.3	922.15	5.4	1.3	31	0.365	30	141.14	23	2	0.596236	12.4795	95.4401	0.518466	1.5554
10	2	8.09	150	919	925.3	922.15	5.4	1.3	31	0.365	30	141.14	23	2	0.596236	12.4795	95.4401	0.518466	1.28061
11	2	8.09	150	919	925.3	922.15	5.4	1.3	31	0.365	30	141.14	23	2	0.596236	12.4795	95.4401	0.518466	0.570313
1	2	8.59	106	917.3	924.1	920.7	3.5	1.1	31.5	0.127	24	176.52	29	2	0.065162	2.32049	97.2686	0.181005	0.170145
2	2	8.59	106	917.3	924.1	920.7	3.5	1.1	31.5	0.127	24	176.52	29	2	0.065162	2.32049	97.2686	0.181005	0.0144804
3	2	8.59	106	917.3	924.1	920.7	3.5	1.1	31.5	0.127	24	176.52	29	2	0.065162	2.32049	97.2686	0.181005	0.066972
4	2	8.59	106	917.3	924.1	920.7	3.5	1.1	31.5	0.127	24	176.52	29	2	0.065162	2.32049	97.2686	0.181005	0.0506815
5	2	8.59	106	917.3	924.1	920.7	3.5	1.1	31.5	0.127	24	176.52	29	2	0.065162	2.32049	97.2686	0.181005	0.00362011
6	2	8.59	106	917.3	924.1	920.7	3.5	1.1	31.5	0.127	24	176.52	29	2	0.065162	2.32049	97.2686	0.181005	0.0416313
7	2	8.59	106	917.3	924.1	920.7	3.5	1.1	31.5	0.127	24	176.52	29	2	0.065162	2.32049	97.2686	0.181005	0.0235307
8	2	8.59	106	917.3	924.1	920.7	3.5	1.1	31.5	0.127	24	176.52	29	2	0.065162	2.32049	97.2686	0.181005	0.00724022
1	2	8.59	106	928.1	933.6	930.85	2.6	1.2	30.2	0.113	28	176.52	29	2	0.0632495	2.25239	97.2686	0.175693	0.165152
2	2	8.59	106	928.1	933.6	930.85	2.6	1.2	30.2	0.113	28	176.52	29	2	0.0632495	2.25239	97.2686	0.175693	0.0140555
3	2	8.59	106	928.1	933.6	930.85	2.6	1.2	30.2	0.113	28	176.52	29	2	0.0632495	2.25239	97.2686	0.175693	0.0650065
4	2	8.59	106	928.1	933.6	930.85	2.6	1.2	30.2	0.113	28	176.52	29	2	0.0632495	2.25239	97.2686	0.175693	0.0491941
5	2	8.59	106	928.1	933.6	930.85	2.6	1.2	30.2	0.113	28	176.52	29	2	0.0632495	2.25239	97.2686	0.175693	0.00351386
6	2	8.59	106	928.1	933.6	930.85	2.6	1.2	30.2	0.113	28	176.52	29	2	0.0632495	2.25239	97.2686	0.175693	0.0404094
7	2	8.59	106	928.1	933.6	930.85	2.6	1.2	30.2	0.113	28	176.52	29	2	0.0632495	2.25239	97.2686	0.175693	0.0228401
8	2	8.59	106	928.1	933.6	930.85	2.6	1.2	30.2	0.113	28	176.52	29	2	0.0632495	2.25239	97.2686	0.175693	0.00702773
1	2	8.91	106	904.9	915.6	910.25	7.1	2.3	31.2	0.689	34	165.22	27	2	1.28592	7.42357	85.2354	0.31061	0.130456
2	2	8.91	106	904.9	915.6	910.25	7.1	2.3	31.2	0.689	34	165.22	27	2	1.28592	7.42357	85.2354	0.31061	0.031061
3	2	8.91	106	904.9	915.6	910.25	7.1	2.3	31.2	0.689	34	165.22	27	2	1.28592	7.42357	85.2354	0.31061	0.0900768
4	2	8.91	106	904.9	915.6	910.25	7.1	2.3	31.2	0.689	34	165.22	27	2	1.28592	7.42357	85.2354	0.31061	0.139774
1	2	8.6	125	920.5	924.6	922.55	2.1	0.8	31.1	0.461	21	142.97	23	2	0.0721377	0.926569	92.7769	0.0267177	0.193169
2	2	8.6	125	920.5	924.6	922.55	2.1	0.8	31.1	0.461	21	142.97	23	2	0.0721377	0.926569	92.7769	0.0267177	0.0889698
3	2	8.6	125	920.5	924.6	922.55	2.1	0.8	31.1	0.461	21	142.97	23	2	0.0721377	0.926569	92.7769	0.0267177	0.048359
4	2	8.6	125	920.5	924.6	922.55	2.1	0.8	31.1	0.461	21	142.97	23	2	0.0721377	0.926569	92.7769	0.0267177	0.0972523
5	2	8.6	125	920.5	924.6	922.55	2.1	0.8	31.1	0.461	21	142.97	23	2	0.0721377	0.926569	92.7769	0.0267177	0.0625193
6	2	8.6	125	920.5	924.6	922.55	2.1	0.8	31.1	0.461	21	142.97	23	2	0.0721377	0.926569	92.7769	0.0267177	0.0569086
7	2	8.6	125	920.5	924.6	922.55	2.1	0.8	31.1	0.461	21	142.97	23	2	0.0721377	0.926569	92.7769	0.0267177	0.0422139
8	2	8.6	125	920.5	924.6	922.55	2.1	0.8	31.1	0.461	21	142.97	23	2	0.0721377	0.926569	92.7769	0.0267177	0.00641224
9	2	8.6	125	920.5	924.6	922.55	2.1	0.8	31.1	0.461	21	142.97	23	2	0.0721377	0.926569	92.7769	0.0267177	0.0221757
10	2	8.6	125	920.5	924.6	922.55	2.1	0.8	31.1	0.461	21	142.97	23	2	0.0721377	0.926569	92.7769	0.0267177	0.0488933
1	2	8.6	125	954	959.4	956.7	3.2	0.8	29.1	0.147	19	141.7	23	2	0.0230027	0.295457	92.7769	0.00851952	0.0615961
2	2	8.6	125	954	959.4	956.7	3.2	0.8	29.1	0.147	19	141.7	23	2	0.0230027	0.295457	92.7769	0.00851952	0.02837
3	2	8.6	125	954	959.4	956.7	3.2	0.8	29.1	0.147	19	141.7	23	2	0.0230027	0.295457	92.7769	0.00851952	0.0154203
4	2	8.6	125	954	959.4	956.7	3.2	0.8	29.1	0.147	19	141.7	23	2	0.0230027	0.295457	92.7769	0.00851952	0.031011
5	2	8.6	125	954	959.4	956.7	3.2	0.8	29.1	0.147	19	141.7	23	2	0.0230027	0.295457	92.7769	0.00851952	0.0199357
6	2	8.6	125	954	959.4	956.7	3.2	0.8	29.1	0.147	19	141.7	23	2	0.0230027	0.295457	92.7769	0.00851952	0.0181466
7	2	8.6	125	954	959.4	956.7	3.2	0.8	29.1	0.147	19	141.7	23	2	0.0230027	0.295457	92.7769	0.00851952	0.0134608
8	2	8.6	125	954	959.4	956.7	3.2	0.8	29.1	0.147	19	141.7	23	2	0.0230027	0.295457	92.7769	0.00851952	0.00204468
9	2	8.6	125	954	959.4	956.7	3.2	0.8	29.1	0.147	19	141.7	23	2	0.0230027	0.295457	92.7769	0.00851952	0.0070712
10	2	8.6	125	954	959.4	956.7	3.2	0.8	29.1	0.147	19	141.7	23	2	0.0230027	0.295457	92.7769	0.00851952	0.0155907
1	2	9.31	125	934.8	941.1	937.95	4.3	2.6	31.6	0.769	24	106.14	17	2	0.425312	10.2308	96.0087	0.332275	0.448572
2	2	9.31	125	934.8	941.1	937.95	4.3	2.6	31.6	0.769	24	106.14	17	2	0.425312	10.2308	96.0087	0.332275	0.634646
3	2	9.31	125	934.8	941.1	937.95	4.3	2.6	31.6	0.769	24	106.14	17	2	0.425312	10.2308	96.0087	0.332275	0.731006
4	2	9.31	125	934.8	941.1	937.95	4.3	2.6	31.6	0.769	24	106.14	17	2	0.425312	10.2308	96.0087	0.332275	0.770879
5	2	9.31	125	934.8	941.1	937.95	4.3	2.6	31.6	0.769	24	106.14	17	2	0.425312	10.2308	96.0087	0.332275	0.618032
6	2	9.31	125	934.8	941.1	937.95	4.3	2.6	31.6	0.769	24	106.14	17	2	0.425312	10.2308	96.0087	0.332275	0.631323
7	2	9.31	125	934.8	941.1	937.95	4.3	2.6	31.6	0.769	24	106.14	17	2	0.425312	10.2308	96.0087	0.332275	0.664551
8	2	9.31	125	934.8	941.1	937.95	4.3	2.6	31.6	0.769	24	106.14	17	2	0.425312	10.2308	96.0087	0.332275	0.78417
9	2	9.31	125	934.8	941.1	937.95	4.3	2.6	31.6	0.769	24	106.14	17	2	0.425312	10.2308	96.0087	0.332275	1.25932
10	2	9.31	125	934.8	941.1	937.95	4.3	2.6	31.6	0.769	24	106.14	17	2	0.425312	10.2308	96.0087	0.332275	1.03005
11	2	9.31	125	934.8	941.1	937.95	4.3	2.6	31.6	0.769	24	106.14	17	2	0.425312	10.2308	96.0087	0.332275	0.661228
12	2	9.31	125	934.8	941.1	937.95	4.3	2.6	31.6	0.769	24	106.14	17	2	0.425312	10.2308	96.0087	0.332275	0.754265
1	2	9.31	125	953.7	962.7	958.2	7.4	4.1	28.6	0.321	23	106.62	17	2	0.279961	6.73437	96.0087	0.218719	0.295271
2	2	9.31	125	953.7	962.7	958.2	7.4	4.1	28.6	0.321	23	106.62	17	2	0.279961	6.73437	96.0087	0.218719	0.417754
3	2	9.31	125	953.7	962.7	958.2	7.4	4.1	28.6	0.321	23	106.62	17	2	0.279961	6.73437	96.0087	0.218719	0.481183
4	2	9.31	125	953.7	962.7	958.2	7.4	4.1	28.6	0.321	23	106.62	17	2	0.279961	6.73437	96.0087	0.218719	0.507429
5	2	9.31	125	953.7	962.7	958.2	7.4	4.1	28.6	0.321	23	106.62	17	2	0.279961	6.73437	96.0087	0.218719	0.406818
6	2	9.31	125	953.7	962.7	958.2	7.4	4.1	28.6	0.321	23	106.62	17	2	0.279961	6.73437	96.0087	0.218719	0.415567
7	2	9.31	125	953.7	962.7	958.2	7.4	4.1	28.6	0.321	23	106.62	17	2	0.279961	6.73437	96.0087	0.218719	0.437439
8	2	9.31	125	953.7	962.7	958.2	7.4	4.1	28.6	0.321	23	106.62	17	2	0.279961	6.73437	96.0087	0.218719	0.516178
9	2	9.31	125	953.7	962.7	958.2	7.4	4.1	28.6	0.321	23	106.62	17	2	0.279961	6.73437	96.0087	0.218719	0.828946
10	2	9.31	125	953.7	962.7	958.2	7.4	4.1	28.6	0.321	23	106.62	17	2	0.279961	6.73437	96.0087	0.218719	0.67803
11	2	9.31	125	953.7	962.7	958.2	7.4	4.1	28.6	0.321	23	106.62	17	2	0.279961	6.73437	96.0087	0.218719	0.435252
12	2	9.31	125	953.7	962.7	958.2	7.4	4.1	28.6	0.321	23	106.62	17	2	0.279961	6.73437	96.0087	0.218719	0.496493
1	2	9.31	125	972	980.3	976.15	5.5	1.8	29.9	0.551	29	118.38	19	2	0.210976	5.07495	96.0087	0.164825	0.222513
2	2	9.31	125	972	980.3	976.15	5.5	1.8	29.9	0.551	29	118.38	19	2	0.210976	5.07495	96.0087	0.164825	0.314815
3	2	9.31	125	972	980.3	976.15	5.5	1.8	29.9	0.551	29	118.38	19	2	0.210976	5.07495	96.0087	0.164825	0.362614
4	2	9.31	125	972	980.3	976.15	5.5	1.8	29.9	0.551	29	118.38	19	2	0.210976	5.07495	96.0087	0.164825	0.382393
5	2	9.31	125	972	980.3	976.15	5.5	1.8	29.9	0.551	29	118.38	19	2	0.210976	5.07495	96.0087	0.164825	0.306574
6	2	9.31	125	972	980.3	976.15	5.5	1.8	29.9	0.551	29	118.38	19	2	0.210976	5.07495	96.0087	0.164825	0.313167
7	2	9.31	125	972	980.3	976.15	5.5	1.8	29.9	0.551	29	118.38	19	2	0.210976	5.07495	96.0087	0.164825	0.32965
8	2	9.31	125	972	980.3	976.15	5.5	1.8	29.9	0.551	29	118.38	19	2	0.210976	5.07495	96.0087	0.164825	0.388986
9	2	9.31	125	972	980.3	976.15	5.5	1.8	29.9	0.551	29	118.38	19	2	0.210976	5.07495	96.0087	0.164825	0.624686
10	2	9.31	125	972	980.3	976.15	5.5	1.8	29.9	0.551	29	118.38	19	2	0.210976	5.07495	96.0087	0.164825	0.510957
11	2	9.31	125	972	980.3	976.15	5.5	1.8	29.9	0.551	29	118.38	19	2	0.210976	5.07495	96.0087	0.164825	0.328001
12	2	9.31	125	972	980.3	976.15	5.5	1.8	29.9	0.551	29	118.38	19	2	0.210976	5.07495	96.0087	0.164825	0.374152
1	2	9.4	125	903	914.4	908.7	6.7	3	30.3	0.691	29	117.62	19	2	1.09986	18.5064	94.3902	0.3188	0.204032
2	2	9.4	125	903	914.4	908.7	6.7	3	30.3	0.691	29	117.62	19	2	1.09986	18.5064	94.3902	0.3188	0.022316
3	2	9.4	125	903	914.4	908.7	6.7	3	30.3	0.691	29	117.62	19	2	1.09986	18.5064	94.3902	0.3188	0.0924521
4	2	9.4	125	903	914.4	908.7	6.7	3	30.3	0.691	29	117.62	19	2	1.09986	18.5064	94.3902	0.3188	0.245476
5	2	9.4	125	903	914.4	908.7	6.7	3	30.3	0.691	29	117.62	19	2	1.09986	18.5064	94.3902	0.3188	0.248664
6	2	9.4	125	903	914.4	908.7	6.7	3	30.3	0.691	29	117.62	19	2	1.09986	18.5064	94.3902	0.3188	0.0701361
7	2	9.4	125	903	914.4	908.7	6.7	3	30.3	0.691	29	117.62	19	2	1.09986	18.5064	94.3902	0.3188	1.01697
8	2	9.4	125	903	914.4	908.7	6.7	3	30.3	0.691	29	117.62	19	2	1.09986	18.5064	94.3902	0.3188	0.848009
9	2	9.4	125	903	914.4	908.7	6.7	3	30.3	0.691	29	117.62	19	2	1.09986	18.5064	94.3902	0.3188	0.541961
1	2	9.79	125	939.6	944.1	941.85	3.6	2.3	28.4	0.216	33	141.14	23	2	0.321855	4.72499	93.6226	0.190447	0.877961
2	2	9.79	125	939.6	944.1	941.85	3.6	2.3	28.4	0.216	33	141.14	23	2	0.321855	4.72499	93.6226	0.190447	0.742743
3	2	9.79	125	939.6	944.1	941.85	3.6	2.3	28.4	0.216	33	141.14	23	2	0.321855	4.72499	93.6226	0.190447	0.44755
4	2	9.79	125	939.6	944.1	941.85	3.6	2.3	28.4	0.216	33	141.14	23	2	0.321855	4.72499	93.6226	0.190447	0.198065
1	2	9.79	125	945.8	949.2	947.5	2.6	0.9	28	0.266	28	141.14	23	2	0.155097	2.2769	93.6226	0.0917734	0.423075
2	2	9.79	125	945.8	949.2	947.5	2.6	0.9	28	0.266	28	141.14	23	2	0.155097	2.2769	93.6226	0.0917734	0.357916
3	2	9.79	125	945.8	949.2	947.5	2.6	0.9	28	0.266	28	141.14	23	2	0.155097	2.2769	93.6226	0.0917734	0.215667
4	2	9.79	125	945.8	949.2	947.5	2.6	0.9	28	0.266	28	141.14	23	2	0.155097	2.2769	93.6226	0.0917734	0.0954443
5	2	9.79	125	945.8	949.2	947.5	2.6	0.9	28	0.266	28	141.14	23	2	0.155097	2.2769	93.6226	0.0917734	0.402885
1	2	9.79	125	955.3	960.2	957.75	3.9	2.5	30.2	0.516	31	106.7	17	2	0.835736	12.269	93.6226	0.494518	2.27973
2	2	9.79	125	955.3	960.2	957.75	3.9	2.5	30.2	0.516	31	106.7	17	2	0.835736	12.269	93.6226	0.494518	1.92862
3	2	9.79	125	955.3	960.2	957.75	3.9	2.5	30.2	0.516	31	106.7	17	2	0.835736	12.269	93.6226	0.494518	1.16212
4	2	9.79	125	955.3	960.2	957.75	3.9	2.5	30.2	0.516	31	106.7	17	2	0.835736	12.269	93.6226	0.494518	0.514299
5	2	9.79	125	955.3	960.2	957.75	3.9	2.5	30.2	0.516	31	106.7	17	2	0.835736	12.269	93.6226	0.494518	2.17093
1	2	9.79	125	964.1	970.7	967.4	2.9	1.4	28.3	0.416	32	141.7	23	2	0.377312	5.53912	93.6226	0.223262	1.02924
2	2	9.79	125	964.1	970.7	967.4	2.9	1.4	28.3	0.416	32	141.7	23	2	0.377312	5.53912	93.6226	0.223262	0.87072
3	2	9.79	125	964.1	970.7	967.4	2.9	1.4	28.3	0.416	32	141.7	23	2	0.377312	5.53912	93.6226	0.223262	0.524665
4	2	9.79	125	964.1	970.7	967.4	2.9	1.4	28.3	0.416	32	141.7	23	2	0.377312	5.53912	93.6226	0.223262	0.232192
1	2	9.51	175	1092.5	1100.5	1096.5	7.6	5	31.9	0.607	37	224.3	37	2	0.98906	21.0571	95.5137	0.428164	0.184111
2	2	9.51	175	1092.5	1100.5	1096.5	7.6	5	31.9	0.607	37	224.3	37	2	0.98906	21.0571	95.5137	0.428164	0.111323
3	2	9.51	175	1092.5	1100.5	1096.5	7.6	5	31.9	0.607	37	224.3	37	2	0.98906	21.0571	95.5137	0.428164	0.0171266
4	2	9.51	175	1092.5	1100.5	1096.5	7.6	5	31.9	0.607	37	224.3	37	2	0.98906	21.0571	95.5137	0.428164	0.201237
5	2	9.51	175	1092.5	1100.5	1096.5	7.6	5	31.9	0.607	37	224.3	37	2	0.98906	21.0571	95.5137	0.428164	0.543769
6	2	9.51	175	1092.5	1100.5	1096.5	7.6	5	31.9	0.607	37	224.3	37	2	0.98906	21.0571	95.5137	0.428164	0.882019
7	2	9.51	175	1092.5	1100.5	1096.5	7.6	5	31.9	0.607	37	224.3	37	2	0.98906	21.0571	95.5137	0.428164	0.436728
8	2	9.51	175	1092.5	1100.5	1096.5	7.6	5	31.9	0.607	37	224.3	37	2	0.98906	21.0571	95.5137	0.428164	0.406756
9	2	9.51	175	1092.5	1100.5	1096.5	7.6	5	31.9	0.607	37	224.3	37	2	0.98906	21.0571	95.5137	0.428164	0.0685063
1	2	8.6	175	973.9	978.7	976.3	3.7	2	31.6	0.504	30	636	100	2	0.0364856	4.96326	99.2703	0.121619	0.141078
2	2	8.6	175	973.9	978.7	976.3	3.7	2	31.6	0.504	30	636	100	2	0.0364856	4.96326	99.2703	0.121619	0.11797
3	2	8.6	175	973.9	978.7	976.3	3.7	2	31.6	0.504	30	636	100	2	0.0364856	4.96326	99.2703	0.121619	0.195806
4	2	8.6	175	973.9	978.7	976.3	3.7	2	31.6	0.504	30	636	100	2	0.0364856	4.96326	99.2703	0.121619	0.0839169
5	2	8.6	175	973.9	978.7	976.3	3.7	2	31.6	0.504	30	636	100	2	0.0364856	4.96326	99.2703	0.121619	0.0741874
6	2	8.6	175	973.9	978.7	976.3	3.7	2	31.6	0.504	30	636	100	2	0.0364856	4.96326	99.2703	0.121619	0.122835
7	2	8.6	175	973.9	978.7	976.3	3.7	2	31.6	0.504	30	636	100	2	0.0364856	4.96326	99.2703	0.121619	0.110673
8	2	8.6	175	973.9	978.7	976.3	3.7	2	31.6	0.504	30	636	100	2	0.0364856	4.96326	99.2703	0.121619	0.0304047
9	2	8.6	175	973.9	978.7	976.3	3.7	2	31.6	0.504	30	636	100	2	0.0364856	4.96326	99.2703	0.121619	0.0377018
10	2	8.6	175	973.9	978.7	976.3	3.7	2	31.6	0.504	30	636	100	2	0.0364856	4.96326	99.2703	0.121619	0.0814845
11	2	8.6	175	973.9	978.7	976.3	3.7	2	31.6	0.504	30	636	100	2	0.0364856	4.96326	99.2703	0.121619	0.0681065
12	2	8.6	175	973.9	978.7	976.3	3.7	2	31.6	0.504	30	636	100	2	0.0364856	4.96326	99.2703	0.121619	0.0608093
1	2	7.49	175	948.1	955.9	952	7.4	5.5	29.2	2.707	32	280.78	47	2	2.54421	11.8164	82.2835	0.628199	1.4637
2	2	7.49	175	948.1	955.9	952	7.4	5.5	29.2	2.707	32	280.78	47	2	2.54421	11.8164	82.2835	0.628199	3.19753
3	2	7.49	175	948.1	955.9	952	7.4	5.5	29.2	2.707	32	280.78	47	2	2.54421	11.8164	82.2835	0.628199	2.11703
4	2	7.49	175	948.1	955.9	952	7.4	5.5	29.2	2.707	32	280.78	47	2	2.54421	11.8164	82.2835	0.628199	1.81549
5	2	7.49	175	948.1	955.9	952	7.4	5.5	29.2	2.707	32	280.78	47	2	2.54421	11.8164	82.2835	0.628199	1.29409
6	2	7.49	175	948.1	955.9	952	7.4	5.5	29.2	2.707	32	280.78	47	2	2.54421	11.8164	82.2835	0.628199	1.05537
7	2	7.49	175	948.1	955.9	952	7.4	5.5	29.2	2.707	32	280.78	47	2	2.54421	11.8164	82.2835	0.628199	0.728711
8	2	7.49	175	948.1	955.9	952	7.4	5.5	29.2	2.707	32	280.78	47	2	2.54421	11.8164	82.2835	0.628199	0.213588
1	2	9.65	175	949	955	952	4.8	3.9	32.3	1.216	28	164.68	27	2	1.05444	20.1104	95.018	0.506943	1.33833
2	2	9.65	175	949	955	952	4.8	3.9	32.3	1.216	28	164.68	27	2	1.05444	20.1104	95.018	0.506943	0.506943
3	2	9.65	175	949	955	952	4.8	3.9	32.3	1.216	28	164.68	27	2	1.05444	20.1104	95.018	0.506943	0.0152083
4	2	9.65	175	949	955	952	4.8	3.9	32.3	1.216	28	164.68	27	2	1.05444	20.1104	95.018	0.506943	0.288957
5	2	9.65	175	949	955	952	4.8	3.9	32.3	1.216	28	164.68	27	2	1.05444	20.1104	95.018	0.506943	1.00882
6	2	9.65	175	949	955	952	4.8	3.9	32.3	1.216	28	164.68	27	2	1.05444	20.1104	95.018	0.506943	0.537359
7	2	9.65	175	949	955	952	4.8	3.9	32.3	1.216	28	164.68	27	2	1.05444	20.1104	95.018	0.506943	1.01389
8	2	9.65	175	949	955	952	4.8	3.9	32.3	1.216	28	164.68	27	2	1.05444	20.1104	95.018	0.506943	0.958122
9	2	9.65	175	949	955	952	4.8	3.9	32.3	1.216	28	164.68	27	2	1.05444	20.1104	95.018	0.506943	0.856733
10	2	9.65	175	949	955	952	4.8	3.9	32.3	1.216	28	164.68	27	2	1.05444	20.1104	95.018	0.506943	0.451179
11	2	9.65	175	949	955	952	4.8	3.9	32.3	1.216	28	164.68	27	2	1.05444	20.1104	95.018	0.506943	0.841525
12	2	9.65	175	949	955	952	4.8	3.9	32.3	1.216	28	164.68	27	2	1.05444	20.1104	95.018	0.506943	0.679303
1	2	9.65	175	957.3	963.6	960.45	5.7	4.1	32	1.125	25	164.46	27	2	1.02556	19.5596	95.018	0.493057	1.30167
2	2	9.65	175	957.3	963.6	960.45	5.7	4.1	32	1.125	25	164.46	27	2	1.02556	19.5596	95.018	0.493057	0.493057
3	2	9.65	175	957.3	963.6	960.45	5.7	4.1	32	1.125	25	164.46	27	2	1.02556	19.5596	95.018	0.493057	0.0147917
4	2	9.65	175	957.3	963.6	960.45	5.7	4.1	32	1.125	25	164.46	27	2	1.02556	19.5596	95.018	0.493057	0.281043
5	2	9.65	175	957.3	963.6	960.45	5.7	4.1	32	1.125	25	164.46	27	2	1.02556	19.5596	95.018	0.493057	0.981184
6	2	9.65	175	957.3	963.6	960.45	5.7	4.1	32	1.125	25	164.46	27	2	1.02556	19.5596	95.018	0.493057	0.522641
7	2	9.65	175	957.3	963.6	960.45	5.7	4.1	32	1.125	25	164.46	27	2	1.02556	19.5596	95.018	0.493057	0.986114
8	2	9.65	175	957.3	963.6	960.45	5.7	4.1	32	1.125	25	164.46	27	2	1.02556	19.5596	95.018	0.493057	0.931878
9	2	9.65	175	957.3	963.6	960.45	5.7	4.1	32	1.125	25	164.46	27	2	1.02556	19.5596	95.018	0.493057	0.833267
10	2	9.65	175	957.3	963.6	960.45	5.7	4.1	32	1.125	25	164.46	27	2	1.02556	19.5596	95.018	0.493057	0.438821
11	2	9.65	175	957.3	963.6	960.45	5.7	4.1	32	1.125	25	164.46	27	2	1.02556	19.5596	95.018	0.493057	0.818475
12	2	9.65	175	957.3	963.6	960.45	5.7	4.1	32	1.125	25	164.46	27	2	1.02556	19.5596	95.018	0.493057	0.660697
1	2	12.38	150	1114.3	1120.9	1117.6	3.5	1.9	27.4	0.379	42	145.3	23	2	0.314427	6.05469	95.0633	0.158003	0.628853
2	2	12.38	150	1114.3	1120.9	1117.6	3.5	1.9	27.4	0.379	42	145.3	23	2	0.314427	6.05469	95.0633	0.158003	0.238585
3	2	12.38	150	1114.3	1120.9	1117.6	3.5	1.9	27.4	0.379	42	145.3	23	2	0.314427	6.05469	95.0633	0.158003	0.221205
4	2	12.38	150	1114.3	1120.9	1117.6	3.5	1.9	27.4	0.379	42	145.3	23	2	0.314427	6.05469	95.0633	0.158003	0.134303
5	2	12.38	150	1114.3	1120.9	1117.6	3.5	1.9	27.4	0.379	42	145.3	23	2	0.314427	6.05469	95.0633	0.158003	0.110602
6	2	12.38	150	1114.3	1120.9	1117.6	3.5	1.9	27.4	0.379	42	145.3	23	2	0.314427	6.05469	95.0633	0.158003	0.0726815
7	2	12.38	150	1114.3	1120.9	1117.6	3.5	1.9	27.4	0.379	42	145.3	23	2	0.314427	6.05469	95.0633	0.158003	0.151683
8	2	12.38	150	1114.3	1120.9	1117.6	3.5	1.9	27.4	0.379	42	145.3	23	2	0.314427	6.05469	95.0633	0.158003	0.206984
9	2	12.38	150	1114.3	1120.9	1117.6	3.5	1.9	27.4	0.379	42	145.3	23	2	0.314427	6.05469	95.0633	0.158003	0.265446
10	2	12.38	150	1114.3	1120.9	1117.6	3.5	1.9	27.4	0.379	42	145.3	23	2	0.314427	6.05469	95.0633	0.158003	0.0916419
11	2	12.38	150	1114.3	1120.9	1117.6	3.5	1.9	27.4	0.379	42	145.3	23	2	0.314427	6.05469	95.0633	0.158003	0.0189604
12	2	12.38	150	1114.3	1120.9	1117.6	3.5	1.9	27.4	0.379	42	145.3	23	2	0.314427	6.05469	95.0633	0.158003	0.104282
1	2	8.09	150	956.6	960.9	958.75	4.3	1.9	31.6	0.388	36	180.39	29	2	0.0376969	2.49553	98.5119	0.107705	0.060315
2	2	8.09	150	956.6	960.9	958.75	4.3	1.9	31.6	0.388	36	180.39	29	2	0.0376969	2.49553	98.5119	0.107705	0.115245
3	2	8.09	150	956.6	960.9	958.75	4.3	1.9	31.6	0.388	36	180.39	29	2	0.0376969	2.49553	98.5119	0.107705	0.12063
4	2	8.09	150	956.6	960.9	958.75	4.3	1.9	31.6	0.388	36	180.39	29	2	0.0376969	2.49553	98.5119	0.107705	0.205717
5	2	8.09	150	956.6	960.9	958.75	4.3	1.9	31.6	0.388	36	180.39	29	2	0.0376969	2.49553	98.5119	0.107705	0.334964
6	2	8.09	150	956.6	960.9	958.75	4.3	1.9	31.6	0.388	36	180.39	29	2	0.0376969	2.49553	98.5119	0.107705	0.330655
7	2	8.09	150	956.6	960.9	958.75	4.3	1.9	31.6	0.388	36	180.39	29	2	0.0376969	2.49553	98.5119	0.107705	0.29619
8	2	8.09	150	956.6	960.9	958.75	4.3	1.9	31.6	0.388	36	180.39	29	2	0.0376969	2.49553	98.5119	0.107705	0.273572
9	2	8.09	150	956.6	960.9	958.75	4.3	1.9	31.6	0.388	36	180.39	29	2	0.0376969	2.49553	98.5119	0.107705	0.242337
10	2	8.09	150	956.6	960.9	958.75	4.3	1.9	31.6	0.388	36	180.39	29	2	0.0376969	2.49553	98.5119	0.107705	0.242337
11	2	8.09	150	956.6	960.9	958.75	4.3	1.9	31.6	0.388	36	180.39	29	2	0.0376969	2.49553	98.5119	0.107705	0.110937
12	2	8.09	150	956.6	960.9	958.75	4.3	1.9	31.6	0.388	36	180.39	29	2	0.0376969	2.49553	98.5119	0.107705	0.0646232
1	2	8.09	150	969.2	980.8	975	10.6	7.8	31.3	0.783	39	146.32	23	2	0.312303	20.6745	98.5119	0.892295	0.499685
2	2	8.09	150	969.2	980.8	975	10.6	7.8	31.3	0.783	39	146.32	23	2	0.312303	20.6745	98.5119	0.892295	0.954755
3	2	8.09	150	969.2	980.8	975	10.6	7.8	31.3	0.783	39	146.32	23	2	0.312303	20.6745	98.5119	0.892295	0.99937
4	2	8.09	150	969.2	980.8	975	10.6	7.8	31.3	0.783	39	146.32	23	2	0.312303	20.6745	98.5119	0.892295	1.70428
5	2	8.09	150	969.2	980.8	975	10.6	7.8	31.3	0.783	39	146.32	23	2	0.312303	20.6745	98.5119	0.892295	2.77504
6	2	8.09	150	969.2	980.8	975	10.6	7.8	31.3	0.783	39	146.32	23	2	0.312303	20.6745	98.5119	0.892295	2.73934
7	2	8.09	150	969.2	980.8	975	10.6	7.8	31.3	0.783	39	146.32	23	2	0.312303	20.6745	98.5119	0.892295	2.45381
8	2	8.09	150	969.2	980.8	975	10.6	7.8	31.3	0.783	39	146.32	23	2	0.312303	20.6745	98.5119	0.892295	2.26643
9	2	8.09	150	969.2	980.8	975	10.6	7.8	31.3	0.783	39	146.32	23	2	0.312303	20.6745	98.5119	0.892295	2.00766
10	2	8.09	150	969.2	980.8	975	10.6	7.8	31.3	0.783	39	146.32	23	2	0.312303	20.6745	98.5119	0.892295	2.00766
11	2	8.09	150	969.2	980.8	975	10.6	7.8	31.3	0.783	39	146.32	23	2	0.312303	20.6745	98.5119	0.892295	0.919063
12	2	8.09	150	969.2	980.8	975	10.6	7.8	31.3	0.783	39	146.32	23	2	0.312303	20.6745	98.5119	0.892295	0.535377
1	2	11.28	150	981.4	988.5	984.95	6	4.7	31.7	0.548	49	179.28	29	2	0.2	28.87	99.312	1	0.07
2	2	11.28	150	981.4	988.5	984.95	6	4.7	31.7	0.548	49	179.28	29	2	0.2	28.87	99.312	1	0.02
3	2	11.28	150	981.4	988.5	984.95	6	4.7	31.7	0.548	49	179.28	29	2	0.2	28.87	99.312	1	0.18
4	2	11.28	150	981.4	988.5	984.95	6	4.7	31.7	0.548	49	179.28	29	2	0.2	28.87	99.312	1	0.41
5	2	11.28	150	981.4	988.5	984.95	6	4.7	31.7	0.548	49	179.28	29	2	0.2	28.87	99.312	1	0.52
6	2	11.28	150	981.4	988.5	984.95	6	4.7	31.7	0.548	49	179.28	29	2	0.2	28.87	99.312	1	0.35
7	2	11.28	150	981.4	988.5	984.95	6	4.7	31.7	0.548	49	179.28	29	2	0.2	28.87	99.312	1	0.45
8	2	11.28	150	981.4	988.5	984.95	6	4.7	31.7	0.548	49	179.28	29	2	0.2	28.87	99.312	1	0.51
9	2	11.28	150	981.4	988.5	984.95	6	4.7	31.7	0.548	49	179.28	29	2	0.2	28.87	99.312	1	0.26
1	2	12.38	150	1133.4	1141.2	1137.3	7.2	6.2	30.6	0.969	32	107.88	17	2	0.249353	20.9041	98.8212	0.593697	0.635256
2	2	12.38	150	1133.4	1141.2	1137.3	7.2	6.2	30.6	0.969	32	107.88	17	2	0.249353	20.9041	98.8212	0.593697	0.777743
3	2	12.38	150	1133.4	1141.2	1137.3	7.2	6.2	30.6	0.969	32	107.88	17	2	0.249353	20.9041	98.8212	0.593697	4.57741
4	2	12.38	150	1133.4	1141.2	1137.3	7.2	6.2	30.6	0.969	32	107.88	17	2	0.249353	20.9041	98.8212	0.593697	4.3518
5	2	12.38	150	1133.4	1141.2	1137.3	7.2	6.2	30.6	0.969	32	107.88	17	2	0.249353	20.9041	98.8212	0.593697	2.71913
6	2	12.38	150	1133.4	1141.2	1137.3	7.2	6.2	30.6	0.969	32	107.88	17	2	0.249353	20.9041	98.8212	0.593697	1.76922
7	2	12.38	150	1133.4	1141.2	1137.3	7.2	6.2	30.6	0.969	32	107.88	17	2	0.249353	20.9041	98.8212	0.593697	2.65976
8	2	12.38	150	1133.4	1141.2	1137.3	7.2	6.2	30.6	0.969	32	107.88	17	2	0.249353	20.9041	98.8212	0.593697	2.0067
9	2	12.38	150	1133.4	1141.2	1137.3	7.2	6.2	30.6	0.969	32	107.88	17	2	0.249353	20.9041	98.8212	0.593697	2.99817
10	2	12.38	150	1133.4	1141.2	1137.3	7.2	6.2	30.6	0.969	32	107.88	17	2	0.249353	20.9041	98.8212	0.593697	3.485
11	2	12.38	150	1133.4	1141.2	1137.3	7.2	6.2	30.6	0.969	32	107.88	17	2	0.249353	20.9041	98.8212	0.593697	3.02192
12	2	12.38	150	1133.4	1141.2	1137.3	7.2	6.2	30.6	0.969	32	107.88	17	2	0.249353	20.9041	98.8212	0.593697	3.53844
1	2	10.3	150	1107.9	1111.2	1109.55	1.6	0.3	27.5	0.193	31	180	29	2	0.0679179	0.954893	93.3597	0.0269515	0.154971
2	2	10.3	150	1107.9	1111.2	1109.55	1.6	0.3	27.5	0.193	31	180	29	2	0.0679179	0.954893	93.3597	0.0269515	0.086784
1	2	10.3	150	1119.8	1124.8	1122.3	1.9	0.7	28.6	0.36	49	178.52	29	2	0.295601	4.15601	93.3597	0.117302	0.674487
2	2	10.3	150	1119.8	1124.8	1122.3	1.9	0.7	28.6	0.36	49	178.52	29	2	0.295601	4.15601	93.3597	0.117302	0.377713
1	2	11.67	150	1051.5	1059.9	1055.7	5.9	3.3	31.6	1.236	0	0	0	2	1.1368	21.4184	94.9599	0.645911	0.394006
2	2	11.67	150	1051.5	1059.9	1055.7	5.9	3.3	31.6	1.236	0	0	0	2	1.1368	21.4184	94.9599	0.645911	1.4533
3	2	11.67	150	1051.5	1059.9	1055.7	5.9	3.3	31.6	1.236	0	0	0	2	1.1368	21.4184	94.9599	0.645911	1.00762
4	2	11.67	150	1051.5	1059.9	1055.7	5.9	3.3	31.6	1.236	0	0	0	2	1.1368	21.4184	94.9599	0.645911	1.89898
5	2	11.67	150	1051.5	1059.9	1055.7	5.9	3.3	31.6	1.236	0	0	0	2	1.1368	21.4184	94.9599	0.645911	1.49205
6	2	11.67	150	1051.5	1059.9	1055.7	5.9	3.3	31.6	1.236	0	0	0	2	1.1368	21.4184	94.9599	0.645911	0.626534
7	2	11.67	150	1051.5	1059.9	1055.7	5.9	3.3	31.6	1.236	0	0	0	2	1.1368	21.4184	94.9599	0.645911	0.788012
8	2	11.67	150	1051.5	1059.9	1055.7	5.9	3.3	31.6	1.236	0	0	0	2	1.1368	21.4184	94.9599	0.645911	1.9119
9	2	11.67	150	1051.5	1059.9	1055.7	5.9	3.3	31.6	1.236	0	0	0	2	1.1368	21.4184	94.9599	0.645911	2.98411
10	2	11.67	150	1051.5	1059.9	1055.7	5.9	3.3	31.6	1.236	0	0	0	2	1.1368	21.4184	94.9599	0.645911	1.93773
11	2	11.67	150	1051.5	1059.9	1055.7	5.9	3.3	31.6	1.236	0	0	0	2	1.1368	21.4184	94.9599	0.645911	1.00762
12	2	11.67	150	1051.5	1059.9	1055.7	5.9	3.3	31.6	1.236	0	0	0	2	1.1368	21.4184	94.9599	0.645911	0.129182
1	2	11.67	150	1064.6	1071.6	1068.1	5.7	2.6	31.2	0.86	37	180.84	29	2	0.623196	11.7416	94.9599	0.354089	0.215994
2	2	11.67	150	1064.6	1071.6	1068.1	5.7	2.6	31.2	0.86	37	180.84	29	2	0.623196	11.7416	94.9599	0.354089	0.7967
3	2	11.67	150	1064.6	1071.6	1068.1	5.7	2.6	31.2	0.86	37	180.84	29	2	0.623196	11.7416	94.9599	0.354089	0.552379
4	2	11.67	150	1064.6	1071.6	1068.1	5.7	2.6	31.2	0.86	37	180.84	29	2	0.623196	11.7416	94.9599	0.354089	1.04102
5	2	11.67	150	1064.6	1071.6	1068.1	5.7	2.6	31.2	0.86	37	180.84	29	2	0.623196	11.7416	94.9599	0.354089	0.817945
6	2	11.67	150	1064.6	1071.6	1068.1	5.7	2.6	31.2	0.86	37	180.84	29	2	0.623196	11.7416	94.9599	0.354089	0.343466
7	2	11.67	150	1064.6	1071.6	1068.1	5.7	2.6	31.2	0.86	37	180.84	29	2	0.623196	11.7416	94.9599	0.354089	0.431988
8	2	11.67	150	1064.6	1071.6	1068.1	5.7	2.6	31.2	0.86	37	180.84	29	2	0.623196	11.7416	94.9599	0.354089	1.0481
9	2	11.67	150	1064.6	1071.6	1068.1	5.7	2.6	31.2	0.86	37	180.84	29	2	0.623196	11.7416	94.9599	0.354089	1.63589
10	2	11.67	150	1064.6	1071.6	1068.1	5.7	2.6	31.2	0.86	37	180.84	29	2	0.623196	11.7416	94.9599	0.354089	1.06227
11	2	11.67	150	1064.6	1071.6	1068.1	5.7	2.6	31.2	0.86	37	180.84	29	2	0.623196	11.7416	94.9599	0.354089	0.552379
12	2	11.67	150	1064.6	1071.6	1068.1	5.7	2.6	31.2	0.86	37	180.84	29	2	0.623196	11.7416	94.9599	0.354089	0.0708178
1	2	10.61	150	1109.6	1115.1	1112.35	3.4	0.2	25.2	0.063	26	227.22	37	2	0.028176	0.217487	88.5306	0.0113157	0.0519389
2	2	10.61	150	1109.6	1115.1	1112.35	3.4	0.2	25.2	0.063	26	227.22	37	2	0.028176	0.217487	88.5306	0.0113157	0.0717414
3	2	10.61	150	1109.6	1115.1	1112.35	3.4	0.2	25.2	0.063	26	227.22	37	2	0.028176	0.217487	88.5306	0.0113157	0.00712887
4	2	10.61	150	1109.6	1115.1	1112.35	3.4	0.2	25.2	0.063	26	227.22	37	2	0.028176	0.217487	88.5306	0.0113157	0.00531837
5	2	10.61	150	1109.6	1115.1	1112.35	3.4	0.2	25.2	0.063	26	227.22	37	2	0.028176	0.217487	88.5306	0.0113157	0.022405
6	2	10.61	150	1109.6	1115.1	1112.35	3.4	0.2	25.2	0.063	26	227.22	37	2	0.028176	0.217487	88.5306	0.0113157	0.0319102
7	2	10.61	150	1109.6	1115.1	1112.35	3.4	0.2	25.2	0.063	26	227.22	37	2	0.028176	0.217487	88.5306	0.0113157	0.0200287
8	2	10.61	150	1109.6	1115.1	1112.35	3.4	0.2	25.2	0.063	26	227.22	37	2	0.028176	0.217487	88.5306	0.0113157	0.0243287
9	2	10.61	150	1109.6	1115.1	1112.35	3.4	0.2	25.2	0.063	26	227.22	37	2	0.028176	0.217487	88.5306	0.0113157	0.0217261
10	2	10.61	150	1109.6	1115.1	1112.35	3.4	0.2	25.2	0.063	26	227.22	37	2	0.028176	0.217487	88.5306	0.0113157	0.0190103
11	2	10.61	150	1109.6	1115.1	1112.35	3.4	0.2	25.2	0.063	26	227.22	37	2	0.028176	0.217487	88.5306	0.0113157	0.0242155
12	2	10.61	150	1109.6	1115.1	1112.35	3.4	0.2	25.2	0.063	26	227.22	37	2	0.028176	0.217487	88.5306	0.0113157	0.0302128
1	2	10.17	150	947.6	953.6	950.6	4.6	1.9	31.3	0.499	23	176.42	29	2	0.273877	2.60183	90.4762	0.142644	1.2353
2	2	10.17	150	947.6	953.6	950.6	4.6	1.9	31.3	0.499	23	176.42	29	2	0.273877	2.60183	90.4762	0.142644	0.70181
3	2	10.17	150	947.6	953.6	950.6	4.6	1.9	31.3	0.499	23	176.42	29	2	0.273877	2.60183	90.4762	0.142644	0.423654
4	2	10.17	150	947.6	953.6	950.6	4.6	1.9	31.3	0.499	23	176.42	29	2	0.273877	2.60183	90.4762	0.142644	0.268171
5	2	10.17	150	947.6	953.6	950.6	4.6	1.9	31.3	0.499	23	176.42	29	2	0.273877	2.60183	90.4762	0.142644	0.0955717
6	2	10.17	150	947.6	953.6	950.6	4.6	1.9	31.3	0.499	23	176.42	29	2	0.273877	2.60183	90.4762	0.142644	0.151203
7	2	10.17	150	947.6	953.6	950.6	4.6	1.9	31.3	0.499	23	176.42	29	2	0.273877	2.60183	90.4762	0.142644	0.0356611
8	2	10.17	150	947.6	953.6	950.6	4.6	1.9	31.3	0.499	23	176.42	29	2	0.273877	2.60183	90.4762	0.142644	0.322376
9	2	10.17	150	947.6	953.6	950.6	4.6	1.9	31.3	0.499	23	176.42	29	2	0.273877	2.60183	90.4762	0.142644	0.231084
1	2	10.17	150	955.8	961.7	958.75	5.5	4.2	32	0.619	28	141.7	23	2	0.751003	7.13453	90.4762	0.391147	3.38734
2	2	10.17	150	955.8	961.7	958.75	5.5	4.2	32	0.619	28	141.7	23	2	0.751003	7.13453	90.4762	0.391147	1.92444
3	2	10.17	150	955.8	961.7	958.75	5.5	4.2	32	0.619	28	141.7	23	2	0.751003	7.13453	90.4762	0.391147	1.16171
4	2	10.17	150	955.8	961.7	958.75	5.5	4.2	32	0.619	28	141.7	23	2	0.751003	7.13453	90.4762	0.391147	0.735357
5	2	10.17	150	955.8	961.7	958.75	5.5	4.2	32	0.619	28	141.7	23	2	0.751003	7.13453	90.4762	0.391147	0.262069
6	2	10.17	150	955.8	961.7	958.75	5.5	4.2	32	0.619	28	141.7	23	2	0.751003	7.13453	90.4762	0.391147	0.414616
7	2	10.17	150	955.8	961.7	958.75	5.5	4.2	32	0.619	28	141.7	23	2	0.751003	7.13453	90.4762	0.391147	0.0977868
8	2	10.17	150	955.8	961.7	958.75	5.5	4.2	32	0.619	28	141.7	23	2	0.751003	7.13453	90.4762	0.391147	0.883993
9	2	10.17	150	955.8	961.7	958.75	5.5	4.2	32	0.619	28	141.7	23	2	0.751003	7.13453	90.4762	0.391147	0.633659
1	2	10.17	150	968.3	975.2	971.75	5.2	3.7	31.7	0.687	25	141.7	23	2	0.734277	6.97564	90.4762	0.382436	3.3119
2	2	10.17	150	968.3	975.2	971.75	5.2	3.7	31.7	0.687	25	141.7	23	2	0.734277	6.97564	90.4762	0.382436	1.88159
3	2	10.17	150	968.3	975.2	971.75	5.2	3.7	31.7	0.687	25	141.7	23	2	0.734277	6.97564	90.4762	0.382436	1.13584
4	2	10.17	150	968.3	975.2	971.75	5.2	3.7	31.7	0.687	25	141.7	23	2	0.734277	6.97564	90.4762	0.382436	0.71898
5	2	10.17	150	968.3	975.2	971.75	5.2	3.7	31.7	0.687	25	141.7	23	2	0.734277	6.97564	90.4762	0.382436	0.256232
6	2	10.17	150	968.3	975.2	971.75	5.2	3.7	31.7	0.687	25	141.7	23	2	0.734277	6.97564	90.4762	0.382436	0.405382
7	2	10.17	150	968.3	975.2	971.75	5.2	3.7	31.7	0.687	25	141.7	23	2	0.734277	6.97564	90.4762	0.382436	0.095609
8	2	10.17	150	968.3	975.2	971.75	5.2	3.7	31.7	0.687	25	141.7	23	2	0.734277	6.97564	90.4762	0.382436	0.864306
9	2	10.17	150	968.3	975.2	971.75	5.2	3.7	31.7	0.687	25	141.7	23	2	0.734277	6.97564	90.4762	0.382436	0.619547
1	2	10.72	175	977.7	981.6	979.65	2.8	0.8	28.8	0.322	33	177.72	29	2	0.949212	6.80807	87.7636	0.20196	1.40564
2	2	10.72	175	977.7	981.6	979.65	2.8	0.8	28.8	0.322	33	177.72	29	2	0.949212	6.80807	87.7636	0.20196	1.35313
3	2	10.72	175	977.7	981.6	979.65	2.8	0.8	28.8	0.322	33	177.72	29	2	0.949212	6.80807	87.7636	0.20196	1.31678
4	2	10.72	175	977.7	981.6	979.65	2.8	0.8	28.8	0.322	33	177.72	29	2	0.949212	6.80807	87.7636	0.20196	1.20166
5	2	10.72	175	977.7	981.6	979.65	2.8	0.8	28.8	0.322	33	177.72	29	2	0.949212	6.80807	87.7636	0.20196	1.26831
6	2	10.72	175	977.7	981.6	979.65	2.8	0.8	28.8	0.322	33	177.72	29	2	0.949212	6.80807	87.7636	0.20196	1.11684
7	2	10.72	175	977.7	981.6	979.65	2.8	0.8	28.8	0.322	33	177.72	29	2	0.949212	6.80807	87.7636	0.20196	1.02192
8	2	10.72	175	977.7	981.6	979.65	2.8	0.8	28.8	0.322	33	177.72	29	2	0.949212	6.80807	87.7636	0.20196	1.07241
9	2	10.72	175	977.7	981.6	979.65	2.8	0.8	28.8	0.322	33	177.72	29	2	0.949212	6.80807	87.7636	0.20196	1.15319
10	2	10.72	175	977.7	981.6	979.65	2.8	0.8	28.8	0.322	33	177.72	29	2	0.949212	6.80807	87.7636	0.20196	1.13502
11	2	10.72	175	977.7	981.6	979.65	2.8	0.8	28.8	0.322	33	177.72	29	2	0.949212	6.80807	87.7636	0.20196	0.817938
12	2	10.72	175	977.7	981.6	979.65	2.8	0.8	28.8	0.322	33	177.72	29	2	0.949212	6.80807	87.7636	0.20196	0.850252
1	2	9.65	175	944.2	949	946.6	4.2	2	28.9	0.263	32	178.64	29	2	0.30549	4.26447	93.3153	0.206412	0.222925
2	2	9.65	175	944.2	949	946.6	4.2	2	28.9	0.263	32	178.64	29	2	0.30549	4.26447	93.3153	0.206412	0.227053
3	2	9.65	175	944.2	949	946.6	4.2	2	28.9	0.263	32	178.64	29	2	0.30549	4.26447	93.3153	0.206412	0.338516
4	2	9.65	175	944.2	949	946.6	4.2	2	28.9	0.263	32	178.64	29	2	0.30549	4.26447	93.3153	0.206412	0.291041
5	2	9.65	175	944.2	949	946.6	4.2	2	28.9	0.263	32	178.64	29	2	0.30549	4.26447	93.3153	0.206412	0.286913
6	2	9.65	175	944.2	949	946.6	4.2	2	28.9	0.263	32	178.64	29	2	0.30549	4.26447	93.3153	0.206412	0.276592
7	2	9.65	175	944.2	949	946.6	4.2	2	28.9	0.263	32	178.64	29	2	0.30549	4.26447	93.3153	0.206412	0.16513
8	2	9.65	175	944.2	949	946.6	4.2	2	28.9	0.263	32	178.64	29	2	0.30549	4.26447	93.3153	0.206412	0.171322
1	2	9.65	175	950.6	956.2	953.4	4.4	2.7	29.7	0.484	29	178.64	29	2	0.758962	10.5947	93.3153	0.512812	0.553837
2	2	9.65	175	950.6	956.2	953.4	4.4	2.7	29.7	0.484	29	178.64	29	2	0.758962	10.5947	93.3153	0.512812	0.564094
3	2	9.65	175	950.6	956.2	953.4	4.4	2.7	29.7	0.484	29	178.64	29	2	0.758962	10.5947	93.3153	0.512812	0.841012
4	2	9.65	175	950.6	956.2	953.4	4.4	2.7	29.7	0.484	29	178.64	29	2	0.758962	10.5947	93.3153	0.512812	0.723066
5	2	9.65	175	950.6	956.2	953.4	4.4	2.7	29.7	0.484	29	178.64	29	2	0.758962	10.5947	93.3153	0.512812	0.712809
6	2	9.65	175	950.6	956.2	953.4	4.4	2.7	29.7	0.484	29	178.64	29	2	0.758962	10.5947	93.3153	0.512812	0.687169
7	2	9.65	175	950.6	956.2	953.4	4.4	2.7	29.7	0.484	29	178.64	29	2	0.758962	10.5947	93.3153	0.512812	0.41025
8	2	9.65	175	950.6	956.2	953.4	4.4	2.7	29.7	0.484	29	178.64	29	2	0.758962	10.5947	93.3153	0.512812	0.425634
1	2	10.54	175	951.2	963.4	957.3	11.7	9	32.2	0.52	26	225.54	37	2	2.79769	25.5245	90.1219	0.500481	1.52146
2	2	10.54	175	951.2	963.4	957.3	11.7	9	32.2	0.52	26	225.54	37	2	2.79769	25.5245	90.1219	0.500481	1.85178
3	2	10.54	175	951.2	963.4	957.3	11.7	9	32.2	0.52	26	225.54	37	2	2.79769	25.5245	90.1219	0.500481	1.91184
4	2	10.54	175	951.2	963.4	957.3	11.7	9	32.2	0.52	26	225.54	37	2	2.79769	25.5245	90.1219	0.500481	1.70164
5	2	10.54	175	951.2	963.4	957.3	11.7	9	32.2	0.52	26	225.54	37	2	2.79769	25.5245	90.1219	0.500481	1.48142
6	2	10.54	175	951.2	963.4	957.3	11.7	9	32.2	0.52	26	225.54	37	2	2.79769	25.5245	90.1219	0.500481	1.07603
7	2	10.54	175	951.2	963.4	957.3	11.7	9	32.2	0.52	26	225.54	37	2	2.79769	25.5245	90.1219	0.500481	0.770741
8	2	10.54	175	951.2	963.4	957.3	11.7	9	32.2	0.52	26	225.54	37	2	2.79769	25.5245	90.1219	0.500481	0.65563
9	2	10.54	175	951.2	963.4	957.3	11.7	9	32.2	0.52	26	225.54	37	2	2.79769	25.5245	90.1219	0.500481	0.775746
10	2	10.54	175	951.2	963.4	957.3	11.7	9	32.2	0.52	26	225.54	37	2	2.79769	25.5245	90.1219	0.500481	0.595573
11	2	10.54	175	951.2	963.4	957.3	11.7	9	32.2	0.52	26	225.54	37	2	2.79769	25.5245	90.1219	0.500481	0.130125
1	2	10.54	175	966.8	976.7	971.75	9.9	9	29.4	0.519	26	199.24	33	2	2.79231	25.4755	90.1219	0.499519	1.51854
2	2	10.54	175	966.8	976.7	971.75	9.9	9	29.4	0.519	26	199.24	33	2	2.79231	25.4755	90.1219	0.499519	1.84822
3	2	10.54	175	966.8	976.7	971.75	9.9	9	29.4	0.519	26	199.24	33	2	2.79231	25.4755	90.1219	0.499519	1.90816
4	2	10.54	175	966.8	976.7	971.75	9.9	9	29.4	0.519	26	199.24	33	2	2.79231	25.4755	90.1219	0.499519	1.69836
5	2	10.54	175	966.8	976.7	971.75	9.9	9	29.4	0.519	26	199.24	33	2	2.79231	25.4755	90.1219	0.499519	1.47858
6	2	10.54	175	966.8	976.7	971.75	9.9	9	29.4	0.519	26	199.24	33	2	2.79231	25.4755	90.1219	0.499519	1.07397
7	2	10.54	175	966.8	976.7	971.75	9.9	9	29.4	0.519	26	199.24	33	2	2.79231	25.4755	90.1219	0.499519	0.769259
8	2	10.54	175	966.8	976.7	971.75	9.9	9	29.4	0.519	26	199.24	33	2	2.79231	25.4755	90.1219	0.499519	0.65437
9	2	10.54	175	966.8	976.7	971.75	9.9	9	29.4	0.519	26	199.24	33	2	2.79231	25.4755	90.1219	0.499519	0.774254
10	2	10.54	175	966.8	976.7	971.75	9.9	9	29.4	0.519	26	199.24	33	2	2.79231	25.4755	90.1219	0.499519	0.594427
11	2	10.54	175	966.8	976.7	971.75	9.9	9	29.4	0.519	26	199.24	33	2	2.79231	25.4755	90.1219	0.499519	0.129875
1	2	11.33	150	897.3	905.6	901.45	7.5	4.1	32	0.932	24	143.54	23	2	1.14803	14.5519	92.6877	0.760287	1.08721
2	2	11.33	150	897.3	905.6	901.45	7.5	4.1	32	0.932	24	143.54	23	2	1.14803	14.5519	92.6877	0.760287	0.0608229
1	2	10.46	150	1046.8	1051.6	1049.2	2.2	0.8	29.5	0.443	34	224.3	37	2	0.185498	5.92599	96.9648	0.331246	0.314684
2	2	10.46	150	1046.8	1051.6	1049.2	2.2	0.8	29.5	0.443	34	224.3	37	2	0.185498	5.92599	96.9648	0.331246	0.37762
3	2	10.46	150	1046.8	1051.6	1049.2	2.2	0.8	29.5	0.443	34	224.3	37	2	0.185498	5.92599	96.9648	0.331246	0.496869
4	2	10.46	150	1046.8	1051.6	1049.2	2.2	0.8	29.5	0.443	34	224.3	37	2	0.185498	5.92599	96.9648	0.331246	0.897676
5	2	10.46	150	1046.8	1051.6	1049.2	2.2	0.8	29.5	0.443	34	224.3	37	2	0.185498	5.92599	96.9648	0.331246	0.894364
6	2	10.46	150	1046.8	1051.6	1049.2	2.2	0.8	29.5	0.443	34	224.3	37	2	0.185498	5.92599	96.9648	0.331246	1.05005
7	2	10.46	150	1046.8	1051.6	1049.2	2.2	0.8	29.5	0.443	34	224.3	37	2	0.185498	5.92599	96.9648	0.331246	0.576368
8	2	10.46	150	1046.8	1051.6	1049.2	2.2	0.8	29.5	0.443	34	224.3	37	2	0.185498	5.92599	96.9648	0.331246	0.722116
9	2	10.46	150	1046.8	1051.6	1049.2	2.2	0.8	29.5	0.443	34	224.3	37	2	0.185498	5.92599	96.9648	0.331246	0.529993
10	2	10.46	150	1046.8	1051.6	1049.2	2.2	0.8	29.5	0.443	34	224.3	37	2	0.185498	5.92599	96.9648	0.331246	0.264997
11	2	10.46	150	1046.8	1051.6	1049.2	2.2	0.8	29.5	0.443	34	224.3	37	2	0.185498	5.92599	96.9648	0.331246	0.351121
12	2	10.46	150	1046.8	1051.6	1049.2	2.2	0.8	29.5	0.443	34	224.3	37	2	0.185498	5.92599	96.9648	0.331246	0.397495
1	2	10.42	175	1010	1021.4	1015.7	10.1	7.9	31.5	1.155	30	127.64	19	2	1.39939	23.7769	94.4416	0.633206	0.0696527
2	2	10.42	175	1010	1021.4	1015.7	10.1	7.9	31.5	1.155	30	127.64	19	2	1.39939	23.7769	94.4416	0.633206	1.10178
3	2	10.42	175	1010	1021.4	1015.7	10.1	7.9	31.5	1.155	30	127.64	19	2	1.39939	23.7769	94.4416	0.633206	1.8363
4	2	10.42	175	1010	1021.4	1015.7	10.1	7.9	31.5	1.155	30	127.64	19	2	1.39939	23.7769	94.4416	0.633206	1.87429
5	2	10.42	175	1010	1021.4	1015.7	10.1	7.9	31.5	1.155	30	127.64	19	2	1.39939	23.7769	94.4416	0.633206	1.50703
6	2	10.42	175	1010	1021.4	1015.7	10.1	7.9	31.5	1.155	30	127.64	19	2	1.39939	23.7769	94.4416	0.633206	1.17776
7	2	10.42	175	1010	1021.4	1015.7	10.1	7.9	31.5	1.155	30	127.64	19	2	1.39939	23.7769	94.4416	0.633206	1.1841
8	2	10.42	175	1010	1021.4	1015.7	10.1	7.9	31.5	1.155	30	127.64	19	2	1.39939	23.7769	94.4416	0.633206	1.80464
9	2	10.42	175	1010	1021.4	1015.7	10.1	7.9	31.5	1.155	30	127.64	19	2	1.39939	23.7769	94.4416	0.633206	1.70332
10	2	10.42	175	1010	1021.4	1015.7	10.1	7.9	31.5	1.155	30	127.64	19	2	1.39939	23.7769	94.4416	0.633206	1.13977
11	2	10.42	175	1010	1021.4	1015.7	10.1	7.9	31.5	1.155	30	127.64	19	2	1.39939	23.7769	94.4416	0.633206	0.278611
1	2	10.42	175	1023.5	1029.6	1026.55	5.7	5.5	31	0.961	30	229.38	37	2	0.810615	13.7731	94.4416	0.366794	0.0403473
2	2	10.42	175	1023.5	1029.6	1026.55	5.7	5.5	31	0.961	30	229.38	37	2	0.810615	13.7731	94.4416	0.366794	0.638221
3	2	10.42	175	1023.5	1029.6	1026.55	5.7	5.5	31	0.961	30	229.38	37	2	0.810615	13.7731	94.4416	0.366794	1.0637
4	2	10.42	175	1023.5	1029.6	1026.55	5.7	5.5	31	0.961	30	229.38	37	2	0.810615	13.7731	94.4416	0.366794	1.08571
5	2	10.42	175	1023.5	1029.6	1026.55	5.7	5.5	31	0.961	30	229.38	37	2	0.810615	13.7731	94.4416	0.366794	0.872969
6	2	10.42	175	1023.5	1029.6	1026.55	5.7	5.5	31	0.961	30	229.38	37	2	0.810615	13.7731	94.4416	0.366794	0.682237
7	2	10.42	175	1023.5	1029.6	1026.55	5.7	5.5	31	0.961	30	229.38	37	2	0.810615	13.7731	94.4416	0.366794	0.685905
8	2	10.42	175	1023.5	1029.6	1026.55	5.7	5.5	31	0.961	30	229.38	37	2	0.810615	13.7731	94.4416	0.366794	1.04536
9	2	10.42	175	1023.5	1029.6	1026.55	5.7	5.5	31	0.961	30	229.38	37	2	0.810615	13.7731	94.4416	0.366794	0.986676
10	2	10.42	175	1023.5	1029.6	1026.55	5.7	5.5	31	0.961	30	229.38	37	2	0.810615	13.7731	94.4416	0.366794	0.660229
11	2	10.42	175	1023.5	1029.6	1026.55	5.7	5.5	31	0.961	30	229.38	37	2	0.810615	13.7731	94.4416	0.366794	0.161389
1	2	9.3	150	956.3	961.8	959.05	3.6	0.8	30.9	0.292	26	180.6	29	2	0.0455293	0.391138	89.5735	0.0689838	0.444946
2	2	9.3	150	956.3	961.8	959.05	3.6	0.8	30.9	0.292	26	180.6	29	2	0.0455293	0.391138	89.5735	0.0689838	0.437358
3	2	9.3	150	956.3	961.8	959.05	3.6	0.8	30.9	0.292	26	180.6	29	2	0.0455293	0.391138	89.5735	0.0689838	0.371133
4	2	9.3	150	956.3	961.8	959.05	3.6	0.8	30.9	0.292	26	180.6	29	2	0.0455293	0.391138	89.5735	0.0689838	0.293871
5	2	9.3	150	956.3	961.8	959.05	3.6	0.8	30.9	0.292	26	180.6	29	2	0.0455293	0.391138	89.5735	0.0689838	0.203502
6	2	9.3	150	956.3	961.8	959.05	3.6	0.8	30.9	0.292	26	180.6	29	2	0.0455293	0.391138	89.5735	0.0689838	0.444946
7	2	9.3	150	956.3	961.8	959.05	3.6	0.8	30.9	0.292	26	180.6	29	2	0.0455293	0.391138	89.5735	0.0689838	0.291802
8	2	9.3	150	956.3	961.8	959.05	3.6	0.8	30.9	0.292	26	180.6	29	2	0.0455293	0.391138	89.5735	0.0689838	0.266967
9	2	9.3	150	956.3	961.8	959.05	3.6	0.8	30.9	0.292	26	180.6	29	2	0.0455293	0.391138	89.5735	0.0689838	0.215919
10	2	9.3	150	956.3	961.8	959.05	3.6	0.8	30.9	0.292	26	180.6	29	2	0.0455293	0.391138	89.5735	0.0689838	0.273176
11	2	9.3	150	956.3	961.8	959.05	3.6	0.8	30.9	0.292	26	180.6	29	2	0.0455293	0.391138	89.5735	0.0689838	0.324224
12	2	9.3	150	956.3	961.8	959.05	3.6	0.8	30.9	0.292	26	180.6	29	2	0.0455293	0.391138	89.5735	0.0689838	0.209711
1	2	9.3	150	972.3	978.2	975.25	4.1	2.6	30.1	0.339	37	228.76	37	2	0.171787	1.47581	89.5735	0.260284	1.67883
2	2	9.3	150	972.3	978.2	975.25	4.1	2.6	30.1	0.339	37	228.76	37	2	0.171787	1.47581	89.5735	0.260284	1.6502
3	2	9.3	150	972.3	978.2	975.25	4.1	2.6	30.1	0.339	37	228.76	37	2	0.171787	1.47581	89.5735	0.260284	1.40033
4	2	9.3	150	972.3	978.2	975.25	4.1	2.6	30.1	0.339	37	228.76	37	2	0.171787	1.47581	89.5735	0.260284	1.10881
5	2	9.3	150	972.3	978.2	975.25	4.1	2.6	30.1	0.339	37	228.76	37	2	0.171787	1.47581	89.5735	0.260284	0.767838
6	2	9.3	150	972.3	978.2	975.25	4.1	2.6	30.1	0.339	37	228.76	37	2	0.171787	1.47581	89.5735	0.260284	1.67883
7	2	9.3	150	972.3	978.2	975.25	4.1	2.6	30.1	0.339	37	228.76	37	2	0.171787	1.47581	89.5735	0.260284	1.101
8	2	9.3	150	972.3	978.2	975.25	4.1	2.6	30.1	0.339	37	228.76	37	2	0.171787	1.47581	89.5735	0.260284	1.0073
9	2	9.3	150	972.3	978.2	975.25	4.1	2.6	30.1	0.339	37	228.76	37	2	0.171787	1.47581	89.5735	0.260284	0.814689
10	2	9.3	150	972.3	978.2	975.25	4.1	2.6	30.1	0.339	37	228.76	37	2	0.171787	1.47581	89.5735	0.260284	1.03072
11	2	9.3	150	972.3	978.2	975.25	4.1	2.6	30.1	0.339	37	228.76	37	2	0.171787	1.47581	89.5735	0.260284	1.22334
12	2	9.3	150	972.3	978.2	975.25	4.1	2.6	30.1	0.339	37	228.76	37	2	0.171787	1.47581	89.5735	0.260284	0.791264
1	2	10.77	175	955.6	959.4	957.5	3.3	2.5	30.8	1.902	23	181.72	29	2	1.72944	30.6855	94.6647	0.966169	0.434776
2	2	10.77	175	955.6	959.4	957.5	3.3	2.5	30.8	1.902	23	181.72	29	2	1.72944	30.6855	94.6647	0.966169	0.74395
3	2	10.77	175	955.6	959.4	957.5	3.3	2.5	30.8	1.902	23	181.72	29	2	1.72944	30.6855	94.6647	0.966169	1.3623
4	2	10.77	175	955.6	959.4	957.5	3.3	2.5	30.8	1.902	23	181.72	29	2	1.72944	30.6855	94.6647	0.966169	0.676318
5	2	10.77	175	955.6	959.4	957.5	3.3	2.5	30.8	1.902	23	181.72	29	2	1.72944	30.6855	94.6647	0.966169	0.183572
6	2	10.77	175	955.6	959.4	957.5	3.3	2.5	30.8	1.902	23	181.72	29	2	1.72944	30.6855	94.6647	0.966169	0.280189
7	2	10.77	175	955.6	959.4	957.5	3.3	2.5	30.8	1.902	23	181.72	29	2	1.72944	30.6855	94.6647	0.966169	0.0966169
8	2	10.77	175	955.6	959.4	957.5	3.3	2.5	30.8	1.902	23	181.72	29	2	1.72944	30.6855	94.6647	0.966169	0.154587
9	2	10.77	175	955.6	959.4	957.5	3.3	2.5	30.8	1.902	23	181.72	29	2	1.72944	30.6855	94.6647	0.966169	0.357482
10	2	10.77	175	955.6	959.4	957.5	3.3	2.5	30.8	1.902	23	181.72	29	2	1.72944	30.6855	94.6647	0.966169	0.454099
11	2	10.77	175	955.6	959.4	957.5	3.3	2.5	30.8	1.902	23	181.72	29	2	1.72944	30.6855	94.6647	0.966169	0.521731
12	2	10.77	175	955.6	959.4	957.5	3.3	2.5	30.8	1.902	23	181.72	29	2	1.72944	30.6855	94.6647	0.966169	0.434776
1	2	10.77	175	960.7	965.4	963.05	2.4	0.9	25.1	0.185	25	216.9	35	2	0.0605578	1.07448	94.6647	0.0338311	0.015224
2	2	10.77	175	960.7	965.4	963.05	2.4	0.9	25.1	0.185	25	216.9	35	2	0.0605578	1.07448	94.6647	0.0338311	0.02605
3	2	10.77	175	960.7	965.4	963.05	2.4	0.9	25.1	0.185	25	216.9	35	2	0.0605578	1.07448	94.6647	0.0338311	0.0477019
4	2	10.77	175	960.7	965.4	963.05	2.4	0.9	25.1	0.185	25	216.9	35	2	0.0605578	1.07448	94.6647	0.0338311	0.0236818
5	2	10.77	175	960.7	965.4	963.05	2.4	0.9	25.1	0.185	25	216.9	35	2	0.0605578	1.07448	94.6647	0.0338311	0.00642792
6	2	10.77	175	960.7	965.4	963.05	2.4	0.9	25.1	0.185	25	216.9	35	2	0.0605578	1.07448	94.6647	0.0338311	0.00981103
7	2	10.77	175	960.7	965.4	963.05	2.4	0.9	25.1	0.185	25	216.9	35	2	0.0605578	1.07448	94.6647	0.0338311	0.00338311
8	2	10.77	175	960.7	965.4	963.05	2.4	0.9	25.1	0.185	25	216.9	35	2	0.0605578	1.07448	94.6647	0.0338311	0.00541298
9	2	10.77	175	960.7	965.4	963.05	2.4	0.9	25.1	0.185	25	216.9	35	2	0.0605578	1.07448	94.6647	0.0338311	0.0125175
10	2	10.77	175	960.7	965.4	963.05	2.4	0.9	25.1	0.185	25	216.9	35	2	0.0605578	1.07448	94.6647	0.0338311	0.0159006
11	2	10.77	175	960.7	965.4	963.05	2.4	0.9	25.1	0.185	25	216.9	35	2	0.0605578	1.07448	94.6647	0.0338311	0.0182688
12	2	10.77	175	960.7	965.4	963.05	2.4	0.9	25.1	0.185	25	216.9	35	2	0.0605578	1.07448	94.6647	0.0338311	0.015224
1	2	9.64	150	922.4	932.8	927.6	9.2	7.1	31.4	0.904	45	145.28	23	2	3.25299	54.4389	94.3614	0.926778	3.99441
2	2	9.64	150	922.4	932.8	927.6	9.2	7.1	31.4	0.904	45	145.28	23	2	3.25299	54.4389	94.3614	0.926778	4.04075
3	2	9.64	150	922.4	932.8	927.6	9.2	7.1	31.4	0.904	45	145.28	23	2	3.25299	54.4389	94.3614	0.926778	5.59774
4	2	9.64	150	922.4	932.8	927.6	9.2	7.1	31.4	0.904	45	145.28	23	2	3.25299	54.4389	94.3614	0.926778	5.60701
5	2	9.64	150	922.4	932.8	927.6	9.2	7.1	31.4	0.904	45	145.28	23	2	3.25299	54.4389	94.3614	0.926778	3.6237
6	2	9.64	150	922.4	932.8	927.6	9.2	7.1	31.4	0.904	45	145.28	23	2	3.25299	54.4389	94.3614	0.926778	2.34475
7	2	9.64	150	922.4	932.8	927.6	9.2	7.1	31.4	0.904	45	145.28	23	2	3.25299	54.4389	94.3614	0.926778	1.26042
8	2	9.64	150	922.4	932.8	927.6	9.2	7.1	31.4	0.904	45	145.28	23	2	3.25299	54.4389	94.3614	0.926778	1.03799
9	2	9.64	150	922.4	932.8	927.6	9.2	7.1	31.4	0.904	45	145.28	23	2	3.25299	54.4389	94.3614	0.926778	1.33456
10	2	9.64	150	922.4	932.8	927.6	9.2	7.1	31.4	0.904	45	145.28	23	2	3.25299	54.4389	94.3614	0.926778	2.32621
11	2	9.64	150	922.4	932.8	927.6	9.2	7.1	31.4	0.904	45	145.28	23	2	3.25299	54.4389	94.3614	0.926778	0.389247
1	2	10.24	150	1108	1117.5	1112.75	8.1	5.8	28.6	0.469	29	144.22	23	2	1.92266	35.2192	94.8235	0.80446	2.91214
2	2	10.24	150	1108	1117.5	1112.75	8.1	5.8	28.6	0.469	29	144.22	23	2	1.92266	35.2192	94.8235	0.80446	2.0031
3	2	10.24	150	1108	1117.5	1112.75	8.1	5.8	28.6	0.469	29	144.22	23	2	1.92266	35.2192	94.8235	0.80446	1.61696
4	2	10.24	150	1108	1117.5	1112.75	8.1	5.8	28.6	0.469	29	144.22	23	2	1.92266	35.2192	94.8235	0.80446	0.498765
5	2	10.24	150	1108	1117.5	1112.75	8.1	5.8	28.6	0.469	29	144.22	23	2	1.92266	35.2192	94.8235	0.80446	0.040223
6	2	10.24	150	1108	1117.5	1112.75	8.1	5.8	28.6	0.469	29	144.22	23	2	1.92266	35.2192	94.8235	0.80446	0.289605
7	2	10.24	150	1108	1117.5	1112.75	8.1	5.8	28.6	0.469	29	144.22	23	2	1.92266	35.2192	94.8235	0.80446	0.378096
1	2	10.83	175	945.8	950.4	948.1	3.5	0.8	0	0.07	29	222.32	37	2	0.0686792	1.94415	96.5879	0.264151	0.206038
2	2	10.83	175	945.8	950.4	948.1	3.5	0.8	0	0.07	29	222.32	37	2	0.0686792	1.94415	96.5879	0.264151	0.316981
3	2	10.83	175	945.8	950.4	948.1	3.5	0.8	0	0.07	29	222.32	37	2	0.0686792	1.94415	96.5879	0.264151	0.536226
4	2	10.83	175	945.8	950.4	948.1	3.5	0.8	0	0.07	29	222.32	37	2	0.0686792	1.94415	96.5879	0.264151	0.517736
5	2	10.83	175	945.8	950.4	948.1	3.5	0.8	0	0.07	29	222.32	37	2	0.0686792	1.94415	96.5879	0.264151	0.499245
6	2	10.83	175	945.8	950.4	948.1	3.5	0.8	0	0.07	29	222.32	37	2	0.0686792	1.94415	96.5879	0.264151	0.567925
7	2	10.83	175	945.8	950.4	948.1	3.5	0.8	0	0.07	29	222.32	37	2	0.0686792	1.94415	96.5879	0.264151	0.620755
8	2	10.83	175	945.8	950.4	948.1	3.5	0.8	0	0.07	29	222.32	37	2	0.0686792	1.94415	96.5879	0.264151	0.596981
9	2	10.83	175	945.8	950.4	948.1	3.5	0.8	0	0.07	29	222.32	37	2	0.0686792	1.94415	96.5879	0.264151	0.533585
10	2	10.83	175	945.8	950.4	948.1	3.5	0.8	0	0.07	29	222.32	37	2	0.0686792	1.94415	96.5879	0.264151	0.615472
11	2	10.83	175	945.8	950.4	948.1	3.5	0.8	0	0.07	29	222.32	37	2	0.0686792	1.94415	96.5879	0.264151	0.744906
12	2	10.83	175	945.8	950.4	948.1	3.5	0.8	0	0.07	29	222.32	37	2	0.0686792	1.94415	96.5879	0.264151	0.913962
1	2	7.69	150	931	937.2	934.1	5.4	1.1	29.8	0.393	28	178.84	29	2	0.137532	6.59889	97.9584	0.264485	1.06852
2	2	7.69	150	931	937.2	934.1	5.4	1.1	29.8	0.393	28	178.84	29	2	0.137532	6.59889	97.9584	0.264485	1.18754
3	2	7.69	150	931	937.2	934.1	5.4	1.1	29.8	0.393	28	178.84	29	2	0.137532	6.59889	97.9584	0.264485	0.875444
4	2	7.69	150	931	937.2	934.1	5.4	1.1	29.8	0.393	28	178.84	29	2	0.137532	6.59889	97.9584	0.264485	1.27746
5	2	7.69	150	931	937.2	934.1	5.4	1.1	29.8	0.393	28	178.84	29	2	0.137532	6.59889	97.9584	0.264485	1.62658
6	2	7.69	150	931	937.2	934.1	5.4	1.1	29.8	0.393	28	178.84	29	2	0.137532	6.59889	97.9584	0.264485	1.46524
7	2	7.69	150	931	937.2	934.1	5.4	1.1	29.8	0.393	28	178.84	29	2	0.137532	6.59889	97.9584	0.264485	0.994462
8	2	7.69	150	931	937.2	934.1	5.4	1.1	29.8	0.393	28	178.84	29	2	0.137532	6.59889	97.9584	0.264485	1.04207
9	2	7.69	150	931	937.2	934.1	5.4	1.1	29.8	0.393	28	178.84	29	2	0.137532	6.59889	97.9584	0.264485	1.16109
10	2	7.69	150	931	937.2	934.1	5.4	1.1	29.8	0.393	28	178.84	29	2	0.137532	6.59889	97.9584	0.264485	0.880734
11	2	7.69	150	931	937.2	934.1	5.4	1.1	29.8	0.393	28	178.84	29	2	0.137532	6.59889	97.9584	0.264485	0.846351
12	2	7.69	150	931	937.2	934.1	5.4	1.1	29.8	0.393	28	178.84	29	2	0.137532	6.59889	97.9584	0.264485	0.965369
1	2	7.69	150	946.4	951	948.7	4.6	2.4	31.1	0.353	28	167.08	27	2	0.269528	12.9322	97.9584	0.518324	2.09403
2	2	7.69	150	946.4	951	948.7	4.6	2.4	31.1	0.353	28	167.08	27	2	0.269528	12.9322	97.9584	0.518324	2.32727
3	2	7.69	150	946.4	951	948.7	4.6	2.4	31.1	0.353	28	167.08	27	2	0.269528	12.9322	97.9584	0.518324	1.71565
4	2	7.69	150	946.4	951	948.7	4.6	2.4	31.1	0.353	28	167.08	27	2	0.269528	12.9322	97.9584	0.518324	2.5035
5	2	7.69	150	946.4	951	948.7	4.6	2.4	31.1	0.353	28	167.08	27	2	0.269528	12.9322	97.9584	0.518324	3.18769
6	2	7.69	150	946.4	951	948.7	4.6	2.4	31.1	0.353	28	167.08	27	2	0.269528	12.9322	97.9584	0.518324	2.87151
7	2	7.69	150	946.4	951	948.7	4.6	2.4	31.1	0.353	28	167.08	27	2	0.269528	12.9322	97.9584	0.518324	1.9489
8	2	7.69	150	946.4	951	948.7	4.6	2.4	31.1	0.353	28	167.08	27	2	0.269528	12.9322	97.9584	0.518324	2.0422
9	2	7.69	150	946.4	951	948.7	4.6	2.4	31.1	0.353	28	167.08	27	2	0.269528	12.9322	97.9584	0.518324	2.27544
10	2	7.69	150	946.4	951	948.7	4.6	2.4	31.1	0.353	28	167.08	27	2	0.269528	12.9322	97.9584	0.518324	1.72602
11	2	7.69	150	946.4	951	948.7	4.6	2.4	31.1	0.353	28	167.08	27	2	0.269528	12.9322	97.9584	0.518324	1.65864
12	2	7.69	150	946.4	951	948.7	4.6	2.4	31.1	0.353	28	167.08	27	2	0.269528	12.9322	97.9584	0.518324	1.89188
1	2	10.13	150	1022.8	1031.2	1027	6.8	3.8	30.1	0.408	32	144.4	23	2	0.683225	28.3761	97.6489	0.742635	1.0991
2	2	10.13	150	1022.8	1031.2	1027	6.8	3.8	30.1	0.408	32	144.4	23	2	0.683225	28.3761	97.6489	0.742635	1.83431
3	2	10.13	150	1022.8	1031.2	1027	6.8	3.8	30.1	0.408	32	144.4	23	2	0.683225	28.3761	97.6489	0.742635	1.9457
4	2	10.13	150	1022.8	1031.2	1027	6.8	3.8	30.1	0.408	32	144.4	23	2	0.683225	28.3761	97.6489	0.742635	1.64122
5	2	10.13	150	1022.8	1031.2	1027	6.8	3.8	30.1	0.408	32	144.4	23	2	0.683225	28.3761	97.6489	0.742635	2.50268
6	2	10.13	150	1022.8	1031.2	1027	6.8	3.8	30.1	0.408	32	144.4	23	2	0.683225	28.3761	97.6489	0.742635	1.88629
7	2	10.13	150	1022.8	1031.2	1027	6.8	3.8	30.1	0.408	32	144.4	23	2	0.683225	28.3761	97.6489	0.742635	1.95313
8	2	10.13	150	1022.8	1031.2	1027	6.8	3.8	30.1	0.408	32	144.4	23	2	0.683225	28.3761	97.6489	0.742635	2.28732
9	2	10.13	150	1022.8	1031.2	1027	6.8	3.8	30.1	0.408	32	144.4	23	2	0.683225	28.3761	97.6489	0.742635	1.73034
10	2	10.13	150	1022.8	1031.2	1027	6.8	3.8	30.1	0.408	32	144.4	23	2	0.683225	28.3761	97.6489	0.742635	2.32445
11	2	10.13	150	1022.8	1031.2	1027	6.8	3.8	30.1	0.408	32	144.4	23	2	0.683225	28.3761	97.6489	0.742635	2.93341
12	2	10.13	150	1022.8	1031.2	1027	6.8	3.8	30.1	0.408	32	144.4	23	2	0.683225	28.3761	97.6489	0.742635	3.05223
1	2	10.09	106	975.1	987.1	981.1	8.4	5.8	31.7	1.087	26	108.72	17	2	1.83459	24.9097	93.1402	0.582411	1.99767
2	2	10.09	106	975.1	987.1	981.1	8.4	5.8	31.7	1.087	26	108.72	17	2	1.83459	24.9097	93.1402	0.582411	1.77635
3	2	10.09	106	975.1	987.1	981.1	8.4	5.8	31.7	1.087	26	108.72	17	2	1.83459	24.9097	93.1402	0.582411	3.33722
4	2	10.09	106	975.1	987.1	981.1	8.4	5.8	31.7	1.087	26	108.72	17	2	1.83459	24.9097	93.1402	0.582411	2.03844
5	2	10.09	106	975.1	987.1	981.1	8.4	5.8	31.7	1.087	26	108.72	17	2	1.83459	24.9097	93.1402	0.582411	4.0827
6	2	10.09	106	975.1	987.1	981.1	8.4	5.8	31.7	1.087	26	108.72	17	2	1.83459	24.9097	93.1402	0.582411	4.86313
7	2	10.09	106	975.1	987.1	981.1	8.4	5.8	31.7	1.087	26	108.72	17	2	1.83459	24.9097	93.1402	0.582411	4.56028
8	2	10.09	106	975.1	987.1	981.1	8.4	5.8	31.7	1.087	26	108.72	17	2	1.83459	24.9097	93.1402	0.582411	3.37798
9	2	10.09	106	975.1	987.1	981.1	8.4	5.8	31.7	1.087	26	108.72	17	2	1.83459	24.9097	93.1402	0.582411	2.83634
10	2	10.09	106	975.1	987.1	981.1	8.4	5.8	31.7	1.087	26	108.72	17	2	1.83459	24.9097	93.1402	0.582411	3.6226
1	2	10.24	150	1112	1117.5	1114.75	3.6	2.6	29.3	0.408	38	227.28	37	2	1.01987	10.4701	91.1238	0.326883	5.2955
2	2	10.24	150	1112	1117.5	1114.75	3.6	2.6	29.3	0.408	38	227.28	37	2	1.01987	10.4701	91.1238	0.326883	3.96836
3	2	10.24	150	1112	1117.5	1114.75	3.6	2.6	29.3	0.408	38	227.28	37	2	1.01987	10.4701	91.1238	0.326883	2.73601
4	2	10.24	150	1112	1117.5	1114.75	3.6	2.6	29.3	0.408	38	227.28	37	2	1.01987	10.4701	91.1238	0.326883	2.62487
5	2	10.24	150	1112	1117.5	1114.75	3.6	2.6	29.3	0.408	38	227.28	37	2	1.01987	10.4701	91.1238	0.326883	1.52654
6	2	10.24	150	1112	1117.5	1114.75	3.6	2.6	29.3	0.408	38	227.28	37	2	1.01987	10.4701	91.1238	0.326883	0.957767
7	2	10.24	150	1112	1117.5	1114.75	3.6	2.6	29.3	0.408	38	227.28	37	2	1.01987	10.4701	91.1238	0.326883	0.758368
8	2	10.24	150	1112	1117.5	1114.75	3.6	2.6	29.3	0.408	38	227.28	37	2	1.01987	10.4701	91.1238	0.326883	0.742024
9	2	10.24	150	1112	1117.5	1114.75	3.6	2.6	29.3	0.408	38	227.28	37	2	1.01987	10.4701	91.1238	0.326883	0.627615
10	2	10.24	150	1112	1117.5	1114.75	3.6	2.6	29.3	0.408	38	227.28	37	2	1.01987	10.4701	91.1238	0.326883	0.457636
11	2	10.24	150	1112	1117.5	1114.75	3.6	2.6	29.3	0.408	38	227.28	37	2	1.01987	10.4701	91.1238	0.326883	0.294195
12	2	10.24	150	1112	1117.5	1114.75	3.6	2.6	29.3	0.408	38	227.28	37	2	1.01987	10.4701	91.1238	0.326883	0.179786
1	2	10.24	150	1128.1	1133.6	1130.85	4.3	3.4	29.8	0.418	35	145.8	23	1	1.36637	14.0272	91.1238	0.437939	7.09461
2	2	10.24	150	1128.1	1133.6	1130.85	4.3	3.4	29.8	0.418	35	145.8	23	1	1.36637	14.0272	91.1238	0.437939	5.31658
3	2	10.24	150	1128.1	1133.6	1130.85	4.3	3.4	29.8	0.418	35	145.8	23	1	1.36637	14.0272	91.1238	0.437939	3.66555
4	2	10.24	150	1128.1	1133.6	1130.85	4.3	3.4	29.8	0.418	35	145.8	23	1	1.36637	14.0272	91.1238	0.437939	3.51665
5	2	10.24	150	1128.1	1133.6	1130.85	4.3	3.4	29.8	0.418	35	145.8	23	1	1.36637	14.0272	91.1238	0.437939	2.04518
6	2	10.24	150	1128.1	1133.6	1130.85	4.3	3.4	29.8	0.418	35	145.8	23	1	1.36637	14.0272	91.1238	0.437939	1.28316
7	2	10.24	150	1128.1	1133.6	1130.85	4.3	3.4	29.8	0.418	35	145.8	23	1	1.36637	14.0272	91.1238	0.437939	1.01602
8	2	10.24	150	1128.1	1133.6	1130.85	4.3	3.4	29.8	0.418	35	145.8	23	1	1.36637	14.0272	91.1238	0.437939	0.994122
9	2	10.24	150	1128.1	1133.6	1130.85	4.3	3.4	29.8	0.418	35	145.8	23	1	1.36637	14.0272	91.1238	0.437939	0.840843
10	2	10.24	150	1128.1	1133.6	1130.85	4.3	3.4	29.8	0.418	35	145.8	23	1	1.36637	14.0272	91.1238	0.437939	0.613115
11	2	10.24	150	1128.1	1133.6	1130.85	4.3	3.4	29.8	0.418	35	145.8	23	1	1.36637	14.0272	91.1238	0.437939	0.394145
12	2	10.24	150	1128.1	1133.6	1130.85	4.3	3.4	29.8	0.418	35	145.8	23	1	1.36637	14.0272	91.1238	0.437939	0.240867
1	2	9.64	150	955.5	961.6	958.55	5.7	2.7	30.5	0.526	29	226.44	37	2	0.38128	6.60246	94.5405	0.274302	0.255101
2	2	9.64	150	955.5	961.6	958.55	5.7	2.7	30.5	0.526	29	226.44	37	2	0.38128	6.60246	94.5405	0.274302	0.260587
3	2	9.64	150	955.5	961.6	958.55	5.7	2.7	30.5	0.526	29	226.44	37	2	0.38128	6.60246	94.5405	0.274302	0.219442
4	2	9.64	150	955.5	961.6	958.55	5.7	2.7	30.5	0.526	29	226.44	37	2	0.38128	6.60246	94.5405	0.274302	0.0246872
5	2	9.64	150	955.5	961.6	958.55	5.7	2.7	30.5	0.526	29	226.44	37	2	0.38128	6.60246	94.5405	0.274302	0.0164581
1	2	12.64	150	1106.3	1111.2	1108.75	3.4	2.4	30.2	0.423	28	145.8	23	2	0.519237	12.146	95.9003	0.260923	0.456616
2	2	12.64	150	1106.3	1111.2	1108.75	3.4	2.4	30.2	0.423	28	145.8	23	2	0.519237	12.146	95.9003	0.260923	0.37312
3	2	12.64	150	1106.3	1111.2	1108.75	3.4	2.4	30.2	0.423	28	145.8	23	2	0.519237	12.146	95.9003	0.260923	0.159163
4	2	12.64	150	1106.3	1111.2	1108.75	3.4	2.4	30.2	0.423	28	145.8	23	2	0.519237	12.146	95.9003	0.260923	0.166991
5	2	12.64	150	1106.3	1111.2	1108.75	3.4	2.4	30.2	0.423	28	145.8	23	2	0.519237	12.146	95.9003	0.260923	0.0704493
1	2	12.64	150	1112.4	1118.4	1115.4	5.8	4.3	30.6	0.402	30	145.8	23	2	0.884115	20.6812	95.9003	0.444279	0.777488
2	2	12.64	150	1112.4	1118.4	1115.4	5.8	4.3	30.6	0.402	30	145.8	23	2	0.884115	20.6812	95.9003	0.444279	0.635319
3	2	12.64	150	1112.4	1118.4	1115.4	5.8	4.3	30.6	0.402	30	145.8	23	2	0.884115	20.6812	95.9003	0.444279	0.27101
4	2	12.64	150	1112.4	1118.4	1115.4	5.8	4.3	30.6	0.402	30	145.8	23	2	0.884115	20.6812	95.9003	0.444279	0.284338
5	2	12.64	150	1112.4	1118.4	1115.4	5.8	4.3	30.6	0.402	30	145.8	23	2	0.884115	20.6812	95.9003	0.444279	0.119955
1	2	9.17	125	890.9	904.8	897.85	6.6	2.9	30.5	0.775	26	144.12	23	2	0.32297	10.8178	97.101	0.339969	0.516753
2	2	9.17	125	890.9	904.8	897.85	6.6	2.9	30.5	0.775	26	144.12	23	2	0.32297	10.8178	97.101	0.339969	0.948513
3	2	9.17	125	890.9	904.8	897.85	6.6	2.9	30.5	0.775	26	144.12	23	2	0.32297	10.8178	97.101	0.339969	0.734333
1	2	9.17	125	907.2	914.5	910.85	6.7	4	31.3	0.807	25	114.12	23	2	0.46387	15.5372	97.101	0.488284	0.742192
2	2	9.17	125	907.2	914.5	910.85	6.7	4	31.3	0.807	25	114.12	23	2	0.46387	15.5372	97.101	0.488284	1.36231
3	2	9.17	125	907.2	914.5	910.85	6.7	4	31.3	0.807	25	114.12	23	2	0.46387	15.5372	97.101	0.488284	1.05469
1	2	9.17	125	919.1	923.4	921.25	3.2	1.4	30.5	0.571	23	190.4	29	2	0.114875	3.84772	97.101	0.120922	0.183801
2	2	9.17	125	919.1	923.4	921.25	3.2	1.4	30.5	0.571	23	190.4	29	2	0.114875	3.84772	97.101	0.120922	0.337371
3	2	9.17	125	919.1	923.4	921.25	3.2	1.4	30.5	0.571	23	190.4	29	2	0.114875	3.84772	97.101	0.120922	0.26119
1	2	9.17	125	926.3	932.6	929.45	3.4	1.2	27.6	0.28	28	144.12	23	2	0.0482839	1.61726	97.101	0.0508252	0.0772542
2	2	9.17	125	926.3	932.6	929.45	3.4	1.2	27.6	0.28	28	144.12	23	2	0.0482839	1.61726	97.101	0.0508252	0.141802
3	2	9.17	125	926.3	932.6	929.45	3.4	1.2	27.6	0.28	28	144.12	23	2	0.0482839	1.61726	97.101	0.0508252	0.109782
1	2	8.94	175	1003.4	1006.8	1005.1	2.7	1.2	31.6	0.223	31	660	80	2	0.420857	13.0741	96.8814	0.161868	3.6048
2	2	8.94	175	1003.4	1006.8	1005.1	2.7	1.2	31.6	0.223	31	660	80	2	0.420857	13.0741	96.8814	0.161868	2.99132
3	2	8.94	175	1003.4	1006.8	1005.1	2.7	1.2	31.6	0.223	31	660	80	2	0.420857	13.0741	96.8814	0.161868	1.77407
4	2	8.94	175	1003.4	1006.8	1005.1	2.7	1.2	31.6	0.223	31	660	80	2	0.420857	13.0741	96.8814	0.161868	1.46005
5	2	8.94	175	1003.4	1006.8	1005.1	2.7	1.2	31.6	0.223	31	660	80	2	0.420857	13.0741	96.8814	0.161868	0.927503
6	2	8.94	175	1003.4	1006.8	1005.1	2.7	1.2	31.6	0.223	31	660	80	2	0.420857	13.0741	96.8814	0.161868	0.459705
7	2	8.94	175	1003.4	1006.8	1005.1	2.7	1.2	31.6	0.223	31	660	80	2	0.420857	13.0741	96.8814	0.161868	0.349635
8	2	8.94	175	1003.4	1006.8	1005.1	2.7	1.2	31.6	0.223	31	660	80	2	0.420857	13.0741	96.8814	0.161868	0.174817
9	2	8.94	175	1003.4	1006.8	1005.1	2.7	1.2	31.6	0.223	31	660	80	2	0.420857	13.0741	96.8814	0.161868	0.139206
10	2	8.94	175	1003.4	1006.8	1005.1	2.7	1.2	31.6	0.223	31	660	80	2	0.420857	13.0741	96.8814	0.161868	0.42895
11	2	8.94	175	1003.4	1006.8	1005.1	2.7	1.2	31.6	0.223	31	660	80	2	0.420857	13.0741	96.8814	0.161868	0.323736
12	2	8.94	175	1003.4	1006.8	1005.1	2.7	1.2	31.6	0.223	31	660	80	2	0.420857	13.0741	96.8814	0.161868	0.0987394
1	2	7.28	175	984.2	988.7	986.45	3.5	0.5	27.1	0.108	37	680	100	2	0.0198041	0.317228	94.124	0.0120757	0.0825976
2	2	7.28	175	984.2	988.7	986.45	3.5	0.5	27.1	0.108	37	680	100	2	0.0198041	0.317228	94.124	0.0120757	0.0815108
3	2	7.28	175	984.2	988.7	986.45	3.5	0.5	27.1	0.108	37	680	100	2	0.0198041	0.317228	94.124	0.0120757	0.0768013
4	2	7.28	175	984.2	988.7	986.45	3.5	0.5	27.1	0.108	37	680	100	2	0.0198041	0.317228	94.124	0.0120757	0.0602576
5	2	7.28	175	984.2	988.7	986.45	3.5	0.5	27.1	0.108	37	680	100	2	0.0198041	0.317228	94.124	0.0120757	0.0277741
6	2	7.28	175	984.2	988.7	986.45	3.5	0.5	27.1	0.108	37	680	100	2	0.0198041	0.317228	94.124	0.0120757	0.00990205
7	2	7.28	175	984.2	988.7	986.45	3.5	0.5	27.1	0.108	37	680	100	2	0.0198041	0.317228	94.124	0.0120757	0.013404
8	2	7.28	175	984.2	988.7	986.45	3.5	0.5	27.1	0.108	37	680	100	2	0.0198041	0.317228	94.124	0.0120757	0.00881524
9	2	7.28	175	984.2	988.7	986.45	3.5	0.5	27.1	0.108	37	680	100	2	0.0198041	0.317228	94.124	0.0120757	0.017872
10	2	7.28	175	984.2	988.7	986.45	3.5	0.5	27.1	0.108	37	680	100	2	0.0198041	0.317228	94.124	0.0120757	0.00712465
11	2	7.28	175	984.2	988.7	986.45	3.5	0.5	27.1	0.108	37	680	100	2	0.0198041	0.317228	94.124	0.0120757	0.00410573
12	2	7.28	175	984.2	988.7	986.45	3.5	0.5	27.1	0.108	37	680	100	2	0.0198041	0.317228	94.124	0.0120757	0.00132832
1	2	9.08	175	1064.3	1068.5	1066.4	2.2	2	31.7	0.522	33	231	37	2	0	0	0	0.293275	1.24349
2	2	9.08	175	1064.3	1068.5	1066.4	2.2	2	31.7	0.522	33	231	37	2	0	0	0	0.293275	1.51037
3	2	9.08	175	1064.3	1068.5	1066.4	2.2	2	31.7	0.522	33	231	37	2	0	0	0	0.293275	1.83883
4	2	9.08	175	1064.3	1068.5	1066.4	2.2	2	31.7	0.522	33	231	37	2	0	0	0	0.293275	1.6482
5	2	9.08	175	1064.3	1068.5	1066.4	2.2	2	31.7	0.522	33	231	37	2	0	0	0	0.293275	1.40479
6	2	9.08	175	1064.3	1068.5	1066.4	2.2	2	31.7	0.522	33	231	37	2	0	0	0	0.293275	1.1731
7	2	9.08	175	1064.3	1068.5	1066.4	2.2	2	31.7	0.522	33	231	37	2	0	0	0	0.293275	0.976605
8	2	9.08	175	1064.3	1068.5	1066.4	2.2	2	31.7	0.522	33	231	37	2	0	0	0	0.293275	0.80064
9	2	9.08	175	1064.3	1068.5	1066.4	2.2	2	31.7	0.522	33	231	37	2	0	0	0	0.293275	0.903287
10	2	9.08	175	1064.3	1068.5	1066.4	2.2	2	31.7	0.522	33	231	37	2	0	0	0	0.293275	0.677465
11	2	9.08	175	1064.3	1068.5	1066.4	2.2	2	31.7	0.522	33	231	37	2	0	0	0	0.293275	0.697994
12	2	9.08	175	1064.3	1068.5	1066.4	2.2	2	31.7	0.522	33	231	37	2	0	0	0	0.293275	0.900354
1	2	10.77	175	945.8	949.1	947.45	2	1.3	30.2	0.554	25	125.32	19	2	1.25478	21.0099	94.3642	0.440274	0.924575
2	2	10.77	175	945.8	949.1	947.45	2	1.3	30.2	0.554	25	125.32	19	2	1.25478	21.0099	94.3642	0.440274	0.805701
3	2	10.77	175	945.8	949.1	947.45	2	1.3	30.2	0.554	25	125.32	19	2	1.25478	21.0099	94.3642	0.440274	0.845326
4	2	10.77	175	945.8	949.1	947.45	2	1.3	30.2	0.554	25	125.32	19	2	1.25478	21.0099	94.3642	0.440274	0.827715
5	2	10.77	175	945.8	949.1	947.45	2	1.3	30.2	0.554	25	125.32	19	2	1.25478	21.0099	94.3642	0.440274	1.11389
6	2	10.77	175	945.8	949.1	947.45	2	1.3	30.2	0.554	25	125.32	19	2	1.25478	21.0099	94.3642	0.440274	1.43529
7	2	10.77	175	945.8	949.1	947.45	2	1.3	30.2	0.554	25	125.32	19	2	1.25478	21.0099	94.3642	0.440274	1.45731
8	2	10.77	175	945.8	949.1	947.45	2	1.3	30.2	0.554	25	125.32	19	2	1.25478	21.0099	94.3642	0.440274	1.06546
9	2	10.77	175	945.8	949.1	947.45	2	1.3	30.2	0.554	25	125.32	19	2	1.25478	21.0099	94.3642	0.440274	0.294983
10	2	10.77	175	945.8	949.1	947.45	2	1.3	30.2	0.554	25	125.32	19	2	1.25478	21.0099	94.3642	0.440274	0.303789
1	2	7.92	125	916.7	924.3	920.5	5.9	1.4	30.7	0.305	0	0	0	2	0.541735	24.0203	97.7944	0.511071	1.33901
2	2	7.92	125	916.7	924.3	920.5	5.9	1.4	30.7	0.305	0	0	0	2	0.541735	24.0203	97.7944	0.511071	1.14991
1	2	7.92	125	952.6	958.2	955.4	2.6	1.3	29.6	0.202	31	176.7	29	2	0.333161	14.7722	97.7944	0.314303	0.823473
2	2	7.92	125	952.6	958.2	955.4	2.6	1.3	29.6	0.202	31	176.7	29	2	0.333161	14.7722	97.7944	0.314303	0.707181
1	2	10.19	175	913.4	924	918.7	10.6	9.2	31.5	1.142	25	178.56	29	2	1.85901	4.01547	68.3544	0.743605	4.20881
2	2	10.19	175	913.4	924	918.7	10.6	9.2	31.5	1.142	25	178.56	29	2	1.85901	4.01547	68.3544	0.743605	5.30934
3	2	10.19	175	913.4	924	918.7	10.6	9.2	31.5	1.142	25	178.56	29	2	1.85901	4.01547	68.3544	0.743605	4.92267
4	2	10.19	175	913.4	924	918.7	10.6	9.2	31.5	1.142	25	178.56	29	2	1.85901	4.01547	68.3544	0.743605	4.54343
5	2	10.19	175	913.4	924	918.7	10.6	9.2	31.5	1.142	25	178.56	29	2	1.85901	4.01547	68.3544	0.743605	4.25342
6	2	10.19	175	913.4	924	918.7	10.6	9.2	31.5	1.142	25	178.56	29	2	1.85901	4.01547	68.3544	0.743605	4.34266
7	2	10.19	175	913.4	924	918.7	10.6	9.2	31.5	1.142	25	178.56	29	2	1.85901	4.01547	68.3544	0.743605	3.90393
8	2	10.19	175	913.4	924	918.7	10.6	9.2	31.5	1.142	25	178.56	29	2	1.85901	4.01547	68.3544	0.743605	2.92237
9	2	10.19	175	913.4	924	918.7	10.6	9.2	31.5	1.142	25	178.56	29	2	1.85901	4.01547	68.3544	0.743605	3.42058
10	2	10.19	175	913.4	924	918.7	10.6	9.2	31.5	1.142	25	178.56	29	2	1.85901	4.01547	68.3544	0.743605	2.87032
11	2	10.19	175	913.4	924	918.7	10.6	9.2	31.5	1.142	25	178.56	29	2	1.85901	4.01547	68.3544	0.743605	1.67311
12	2	10.19	175	913.4	924	918.7	10.6	9.2	31.5	1.142	25	178.56	29	2	1.85901	4.01547	68.3544	0.743605	2.47621
1	2	11.08	175	963.1	976.2	969.65	12.6	9	28.9	0.405	26	214.4	37	2	2.96099	57.4178	95.096	0.9055	4.28302
2	2	11.08	175	963.1	976.2	969.65	12.6	9	28.9	0.405	26	214.4	37	2	2.96099	57.4178	95.096	0.9055	6.32945
3	2	11.08	175	963.1	976.2	969.65	12.6	9	28.9	0.405	26	214.4	37	2	2.96099	57.4178	95.096	0.9055	6.38378
4	2	11.08	175	963.1	976.2	969.65	12.6	9	28.9	0.405	26	214.4	37	2	2.96099	57.4178	95.096	0.9055	4.48223
5	2	11.08	175	963.1	976.2	969.65	12.6	9	28.9	0.405	26	214.4	37	2	2.96099	57.4178	95.096	0.9055	4.5275
6	2	11.08	175	963.1	976.2	969.65	12.6	9	28.9	0.405	26	214.4	37	2	2.96099	57.4178	95.096	0.9055	4.72671
7	2	11.08	175	963.1	976.2	969.65	12.6	9	28.9	0.405	26	214.4	37	2	2.96099	57.4178	95.096	0.9055	4.85348
8	2	11.08	175	963.1	976.2	969.65	12.6	9	28.9	0.405	26	214.4	37	2	2.96099	57.4178	95.096	0.9055	5.32434
9	2	11.08	175	963.1	976.2	969.65	12.6	9	28.9	0.405	26	214.4	37	2	2.96099	57.4178	95.096	0.9055	6.25701
10	2	11.08	175	963.1	976.2	969.65	12.6	9	28.9	0.405	26	214.4	37	2	2.96099	57.4178	95.096	0.9055	6.94519
11	2	11.08	175	963.1	976.2	969.65	12.6	9	28.9	0.405	26	214.4	37	2	2.96099	57.4178	95.096	0.9055	6.61015
12	2	11.08	175	963.1	976.2	969.65	12.6	9	28.9	0.405	26	214.4	37	2	2.96099	57.4178	95.096	0.9055	6.40189
1	2	11.08	175	977.9	983.6	980.75	4	1.3	28.4	0.288	27	213.08	37	2	0.304141	5.89773	95.096	0.0930094	0.439934
2	2	11.08	175	977.9	983.6	980.75	4	1.3	28.4	0.288	27	213.08	37	2	0.304141	5.89773	95.096	0.0930094	0.650136
3	2	11.08	175	977.9	983.6	980.75	4	1.3	28.4	0.288	27	213.08	37	2	0.304141	5.89773	95.096	0.0930094	0.655716
4	2	11.08	175	977.9	983.6	980.75	4	1.3	28.4	0.288	27	213.08	37	2	0.304141	5.89773	95.096	0.0930094	0.460396
5	2	11.08	175	977.9	983.6	980.75	4	1.3	28.4	0.288	27	213.08	37	2	0.304141	5.89773	95.096	0.0930094	0.465047
6	2	11.08	175	977.9	983.6	980.75	4	1.3	28.4	0.288	27	213.08	37	2	0.304141	5.89773	95.096	0.0930094	0.485509
7	2	11.08	175	977.9	983.6	980.75	4	1.3	28.4	0.288	27	213.08	37	2	0.304141	5.89773	95.096	0.0930094	0.49853
8	2	11.08	175	977.9	983.6	980.75	4	1.3	28.4	0.288	27	213.08	37	2	0.304141	5.89773	95.096	0.0930094	0.546895
9	2	11.08	175	977.9	983.6	980.75	4	1.3	28.4	0.288	27	213.08	37	2	0.304141	5.89773	95.096	0.0930094	0.642695
10	2	11.08	175	977.9	983.6	980.75	4	1.3	28.4	0.288	27	213.08	37	2	0.304141	5.89773	95.096	0.0930094	0.713382
11	2	11.08	175	977.9	983.6	980.75	4	1.3	28.4	0.288	27	213.08	37	2	0.304141	5.89773	95.096	0.0930094	0.678969
12	2	11.08	175	977.9	983.6	980.75	4	1.3	28.4	0.288	27	213.08	37	2	0.304141	5.89773	95.096	0.0930094	0.657576
1	2	9.96	175	974.6	977.6	976.1	2.6	1.5	31.8	0.364	30	680	100	2	0.114369	2.77131	96.0367	0.0853498	0.0938848
2	2	9.96	175	974.6	977.6	976.1	2.6	1.5	31.8	0.364	30	680	100	2	0.114369	2.77131	96.0367	0.0853498	0.345667
3	2	9.96	175	974.6	977.6	976.1	2.6	1.5	31.8	0.364	30	680	100	2	0.114369	2.77131	96.0367	0.0853498	0.523195
4	2	9.96	175	974.6	977.6	976.1	2.6	1.5	31.8	0.364	30	680	100	2	0.114369	2.77131	96.0367	0.0853498	0.356762
5	2	9.96	175	974.6	977.6	976.1	2.6	1.5	31.8	0.364	30	680	100	2	0.114369	2.77131	96.0367	0.0853498	0.174114
6	2	9.96	175	974.6	977.6	976.1	2.6	1.5	31.8	0.364	30	680	100	2	0.114369	2.77131	96.0367	0.0853498	0.182649
7	2	9.96	175	974.6	977.6	976.1	2.6	1.5	31.8	0.364	30	680	100	2	0.114369	2.77131	96.0367	0.0853498	0.174114
8	2	9.96	175	974.6	977.6	976.1	2.6	1.5	31.8	0.364	30	680	100	2	0.114369	2.77131	96.0367	0.0853498	0.116929
9	2	9.96	175	974.6	977.6	976.1	2.6	1.5	31.8	0.364	30	680	100	2	0.114369	2.77131	96.0367	0.0853498	0.256903
10	2	9.96	175	974.6	977.6	976.1	2.6	1.5	31.8	0.364	30	680	100	2	0.114369	2.77131	96.0367	0.0853498	0.196305
11	2	9.96	175	974.6	977.6	976.1	2.6	1.5	31.8	0.364	30	680	100	2	0.114369	2.77131	96.0367	0.0853498	0.200572
12	2	9.96	175	974.6	977.6	976.1	2.6	1.5	31.8	0.364	30	680	100	2	0.114369	2.77131	96.0367	0.0853498	0.246661
1	2	10.05	125	941.5	945.5	943.5	3.2	1.5	31.3	0.376	29	74.4	11.5	2	0.1228	3.77865	96.8525	0.0852775	0.109155
2	2	10.05	125	941.5	945.5	943.5	3.2	1.5	31.3	0.376	29	74.4	11.5	2	0.1228	3.77865	96.8525	0.0852775	0.311263
3	2	10.05	125	941.5	945.5	943.5	3.2	1.5	31.3	0.376	29	74.4	11.5	2	0.1228	3.77865	96.8525	0.0852775	0.167997
4	2	10.05	125	941.5	945.5	943.5	3.2	1.5	31.3	0.376	29	74.4	11.5	2	0.1228	3.77865	96.8525	0.0852775	0.0366693
1	2	10.05	125	955.1	961.2	958.15	5.2	3.2	30.4	0.55	24	38.64	6	2	0.383205	11.7915	96.8525	0.266114	0.340626
2	2	10.05	125	955.1	961.2	958.15	5.2	3.2	30.4	0.55	24	38.64	6	2	0.383205	11.7915	96.8525	0.266114	0.971317
3	2	10.05	125	955.1	961.2	958.15	5.2	3.2	30.4	0.55	24	38.64	6	2	0.383205	11.7915	96.8525	0.266114	0.524245
4	2	10.05	125	955.1	961.2	958.15	5.2	3.2	30.4	0.55	24	38.64	6	2	0.383205	11.7915	96.8525	0.266114	0.114429
1	2	11.54	150	1089.8	1093.2	1091.5	2.3	1.3	29.5	0.252	0	184.96	29	2	0.215395	4.30346	95.2334	0.222057	0.290894
1	2	9.08	175	1026	1027.8	1026.9	1.4	0.9	30.1	0.708	30	200.09	33	2	0.234526	6.47879	96.5066	0.104699	0.44916
2	2	9.08	175	1026	1027.8	1026.9	1.4	0.9	30.1	0.708	30	200.09	33	2	0.234526	6.47879	96.5066	0.104699	0.397857
3	2	9.08	175	1026	1027.8	1026.9	1.4	0.9	30.1	0.708	30	200.09	33	2	0.234526	6.47879	96.5066	0.104699	0.281641
4	2	9.08	175	1026	1027.8	1026.9	1.4	0.9	30.1	0.708	30	200.09	33	2	0.234526	6.47879	96.5066	0.104699	0.1916
5	2	9.08	175	1026	1027.8	1026.9	1.4	0.9	30.1	0.708	30	200.09	33	2	0.234526	6.47879	96.5066	0.104699	0.168566
6	2	9.08	175	1026	1027.8	1026.9	1.4	0.9	30.1	0.708	30	200.09	33	2	0.234526	6.47879	96.5066	0.104699	0.142391
7	2	9.08	175	1026	1027.8	1026.9	1.4	0.9	30.1	0.708	30	200.09	33	2	0.234526	6.47879	96.5066	0.104699	0.174848
8	2	9.08	175	1026	1027.8	1026.9	1.4	0.9	30.1	0.708	30	200.09	33	2	0.234526	6.47879	96.5066	0.104699	0.138203
9	2	9.08	175	1026	1027.8	1026.9	1.4	0.9	30.1	0.708	30	200.09	33	2	0.234526	6.47879	96.5066	0.104699	0.134015
10	2	9.08	175	1026	1027.8	1026.9	1.4	0.9	30.1	0.708	30	200.09	33	2	0.234526	6.47879	96.5066	0.104699	0.120404
11	2	9.08	175	1026	1027.8	1026.9	1.4	0.9	30.1	0.708	30	200.09	33	2	0.234526	6.47879	96.5066	0.104699	0.13925
12	2	9.08	175	1026	1027.8	1026.9	1.4	0.9	30.1	0.708	30	200.09	33	2	0.234526	6.47879	96.5066	0.104699	0.123545
1	2	9.08	175	1032.9	1042.2	1037.55	7.7	4.9	32.2	1.112	31	229.35	37	2	2.00547	55.4012	96.5066	0.895301	3.84084
2	2	9.08	175	1032.9	1042.2	1037.55	7.7	4.9	32.2	1.112	31	229.35	37	2	2.00547	55.4012	96.5066	0.895301	3.40214
3	2	9.08	175	1032.9	1042.2	1037.55	7.7	4.9	32.2	1.112	31	229.35	37	2	2.00547	55.4012	96.5066	0.895301	2.40836
4	2	9.08	175	1032.9	1042.2	1037.55	7.7	4.9	32.2	1.112	31	229.35	37	2	2.00547	55.4012	96.5066	0.895301	1.6384
5	2	9.08	175	1032.9	1042.2	1037.55	7.7	4.9	32.2	1.112	31	229.35	37	2	2.00547	55.4012	96.5066	0.895301	1.44143
6	2	9.08	175	1032.9	1042.2	1037.55	7.7	4.9	32.2	1.112	31	229.35	37	2	2.00547	55.4012	96.5066	0.895301	1.21761
7	2	9.08	175	1032.9	1042.2	1037.55	7.7	4.9	32.2	1.112	31	229.35	37	2	2.00547	55.4012	96.5066	0.895301	1.49515
8	2	9.08	175	1032.9	1042.2	1037.55	7.7	4.9	32.2	1.112	31	229.35	37	2	2.00547	55.4012	96.5066	0.895301	1.1818
9	2	9.08	175	1032.9	1042.2	1037.55	7.7	4.9	32.2	1.112	31	229.35	37	2	2.00547	55.4012	96.5066	0.895301	1.14598
10	2	9.08	175	1032.9	1042.2	1037.55	7.7	4.9	32.2	1.112	31	229.35	37	2	2.00547	55.4012	96.5066	0.895301	1.0296
11	2	9.08	175	1032.9	1042.2	1037.55	7.7	4.9	32.2	1.112	31	229.35	37	2	2.00547	55.4012	96.5066	0.895301	1.19075
12	2	9.08	175	1032.9	1042.2	1037.55	7.7	4.9	32.2	1.112	31	229.35	37	2	2.00547	55.4012	96.5066	0.895301	1.05645
1	2	11.61	175	967	974	970.5	5.7	4.7	29.7	0.391	28	142.14	23	2	1.00735	4.39502	81.3535	0.255673	0.478108
2	2	11.61	175	967	974	970.5	5.7	4.7	29.7	0.391	28	142.14	23	2	1.00735	4.39502	81.3535	0.255673	0.590604
3	2	11.61	175	967	974	970.5	5.7	4.7	29.7	0.391	28	142.14	23	2	1.00735	4.39502	81.3535	0.255673	0.503676
4	2	11.61	175	967	974	970.5	5.7	4.7	29.7	0.391	28	142.14	23	2	1.00735	4.39502	81.3535	0.255673	0.68776
5	2	11.61	175	967	974	970.5	5.7	4.7	29.7	0.391	28	142.14	23	2	1.00735	4.39502	81.3535	0.255673	0.96133
6	2	11.61	175	967	974	970.5	5.7	4.7	29.7	0.391	28	142.14	23	2	1.00735	4.39502	81.3535	0.255673	0.767019
7	2	11.61	175	967	974	970.5	5.7	4.7	29.7	0.391	28	142.14	23	2	1.00735	4.39502	81.3535	0.255673	0.67242
1	2	9.55	150	977.9	984.7	981.3	6.2	5	31.7	0.688	34	176.7	29	2	0.546457	17.2509	96.9296	0.535742	0.101791
2	2	9.55	150	977.9	984.7	981.3	6.2	5	31.7	0.688	34	176.7	29	2	0.546457	17.2509	96.9296	0.535742	0.128578
3	2	9.55	150	977.9	984.7	981.3	6.2	5	31.7	0.688	34	176.7	29	2	0.546457	17.2509	96.9296	0.535742	0.160723
4	2	9.55	150	977.9	984.7	981.3	6.2	5	31.7	0.688	34	176.7	29	2	0.546457	17.2509	96.9296	0.535742	0.0482168
5	2	9.55	150	977.9	984.7	981.3	6.2	5	31.7	0.688	34	176.7	29	2	0.546457	17.2509	96.9296	0.535742	0.101791
6	2	9.55	150	977.9	984.7	981.3	6.2	5	31.7	0.688	34	176.7	29	2	0.546457	17.2509	96.9296	0.535742	0.417879
7	2	9.55	150	977.9	984.7	981.3	6.2	5	31.7	0.688	34	176.7	29	2	0.546457	17.2509	96.9296	0.535742	0.14465
8	2	9.55	150	977.9	984.7	981.3	6.2	5	31.7	0.688	34	176.7	29	2	0.546457	17.2509	96.9296	0.535742	0.412521
9	2	9.55	150	977.9	984.7	981.3	6.2	5	31.7	0.688	34	176.7	29	2	0.546457	17.2509	96.9296	0.535742	0.846473
10	2	9.55	150	977.9	984.7	981.3	6.2	5	31.7	0.688	34	176.7	29	2	0.546457	17.2509	96.9296	0.535742	0.251799
1	2	9.3	150	960.2	967.6	963.9	6.2	4.4	30.5	0.887	29	176.7	29	2	1.57714	13.912	89.8177	0.486773	0.36508
2	2	9.3	150	960.2	967.6	963.9	6.2	4.4	30.5	0.887	29	176.7	29	2	1.57714	13.912	89.8177	0.486773	0.355344
3	2	9.3	150	960.2	967.6	963.9	6.2	4.4	30.5	0.887	29	176.7	29	2	1.57714	13.912	89.8177	0.486773	0.569524
4	2	9.3	150	960.2	967.6	963.9	6.2	4.4	30.5	0.887	29	176.7	29	2	1.57714	13.912	89.8177	0.486773	6.03599
5	2	9.3	150	960.2	967.6	963.9	6.2	4.4	30.5	0.887	29	176.7	29	2	1.57714	13.912	89.8177	0.486773	3.07641
6	2	9.3	150	960.2	967.6	963.9	6.2	4.4	30.5	0.887	29	176.7	29	2	1.57714	13.912	89.8177	0.486773	4.47344
7	2	9.3	150	960.2	967.6	963.9	6.2	4.4	30.5	0.887	29	176.7	29	2	1.57714	13.912	89.8177	0.486773	3.85524
8	2	9.3	150	960.2	967.6	963.9	6.2	4.4	30.5	0.887	29	176.7	29	2	1.57714	13.912	89.8177	0.486773	2.13207
9	2	9.3	150	960.2	967.6	963.9	6.2	4.4	30.5	0.887	29	176.7	29	2	1.57714	13.912	89.8177	0.486773	2.89143
10	2	9.3	150	960.2	967.6	963.9	6.2	4.4	30.5	0.887	29	176.7	29	2	1.57714	13.912	89.8177	0.486773	1.78646
11	2	9.3	150	960.2	967.6	963.9	6.2	4.4	30.5	0.887	29	176.7	29	2	1.57714	13.912	89.8177	0.486773	1.95196
1	2	8.72	175	1022.1	1028.7	1025.4	5.9	5.2	29.6	0.634	27	176.98	29	2	1.23317	11.2882	90.1515	0.499258	1.90717
2	2	8.72	175	1022.1	1028.7	1025.4	5.9	5.2	29.6	0.634	27	176.98	29	2	1.23317	11.2882	90.1515	0.499258	1.72743
3	2	8.72	175	1022.1	1028.7	1025.4	5.9	5.2	29.6	0.634	27	176.98	29	2	1.23317	11.2882	90.1515	0.499258	1.36297
4	2	8.72	175	1022.1	1028.7	1025.4	5.9	5.2	29.6	0.634	27	176.98	29	2	1.23317	11.2882	90.1515	0.499258	1.09837
5	2	8.72	175	1022.1	1028.7	1025.4	5.9	5.2	29.6	0.634	27	176.98	29	2	1.23317	11.2882	90.1515	0.499258	1.36797
6	2	8.72	175	1022.1	1028.7	1025.4	5.9	5.2	29.6	0.634	27	176.98	29	2	1.23317	11.2882	90.1515	0.499258	1.44785
7	2	8.72	175	1022.1	1028.7	1025.4	5.9	5.2	29.6	0.634	27	176.98	29	2	1.23317	11.2882	90.1515	0.499258	1.58764
8	2	8.72	175	1022.1	1028.7	1025.4	5.9	5.2	29.6	0.634	27	176.98	29	2	1.23317	11.2882	90.1515	0.499258	1.65254
9	2	8.72	175	1022.1	1028.7	1025.4	5.9	5.2	29.6	0.634	27	176.98	29	2	1.23317	11.2882	90.1515	0.499258	0.449332
1	2	9.95	150	916.5	919.4	917.95	2.1	1.9	29.5	0.21	33	212.54	35	2	0.044186	1.31275	96.7437	0.142536	0.059865
2	2	9.95	150	916.5	919.4	917.95	2.1	1.9	29.5	0.21	33	212.54	35	2	0.044186	1.31275	96.7437	0.142536	0.34066
3	2	9.95	150	916.5	919.4	917.95	2.1	1.9	29.5	0.21	33	212.54	35	2	0.044186	1.31275	96.7437	0.142536	0.287922
4	2	9.95	150	916.5	919.4	917.95	2.1	1.9	29.5	0.21	33	212.54	35	2	0.044186	1.31275	96.7437	0.142536	0.417629
5	2	9.95	150	916.5	919.4	917.95	2.1	1.9	29.5	0.21	33	212.54	35	2	0.044186	1.31275	96.7437	0.142536	0.454689
6	2	9.95	150	916.5	919.4	917.95	2.1	1.9	29.5	0.21	33	212.54	35	2	0.044186	1.31275	96.7437	0.142536	0.386272
7	2	9.95	150	916.5	919.4	917.95	2.1	1.9	29.5	0.21	33	212.54	35	2	0.044186	1.31275	96.7437	0.142536	0.473218
8	2	9.95	150	916.5	919.4	917.95	2.1	1.9	29.5	0.21	33	212.54	35	2	0.044186	1.31275	96.7437	0.142536	0.657089
9	2	9.95	150	916.5	919.4	917.95	2.1	1.9	29.5	0.21	33	212.54	35	2	0.044186	1.31275	96.7437	0.142536	0.297899
10	2	9.95	150	916.5	919.4	917.95	2.1	1.9	29.5	0.21	33	212.54	35	2	0.044186	1.31275	96.7437	0.142536	0.426182
11	2	9.95	150	916.5	919.4	917.95	2.1	1.9	29.5	0.21	33	212.54	35	2	0.044186	1.31275	96.7437	0.142536	0.35919
12	2	9.95	150	916.5	919.4	917.95	2.1	1.9	29.5	0.21	33	212.54	35	2	0.044186	1.31275	96.7437	0.142536	0.346362
1	2	9.95	150	926	931.9	928.95	2.6	0.8	27.6	0.061	55	213.14	35	2	0.00540421	0.160557	96.7437	0.0174329	0.00732183
2	2	9.95	150	926	931.9	928.95	2.6	0.8	27.6	0.061	55	213.14	35	2	0.00540421	0.160557	96.7437	0.0174329	0.0416647
3	2	9.95	150	926	931.9	928.95	2.6	0.8	27.6	0.061	55	213.14	35	2	0.00540421	0.160557	96.7437	0.0174329	0.0352145
4	2	9.95	150	926	931.9	928.95	2.6	0.8	27.6	0.061	55	213.14	35	2	0.00540421	0.160557	96.7437	0.0174329	0.0510785
5	2	9.95	150	926	931.9	928.95	2.6	0.8	27.6	0.061	55	213.14	35	2	0.00540421	0.160557	96.7437	0.0174329	0.055611
6	2	9.95	150	926	931.9	928.95	2.6	0.8	27.6	0.061	55	213.14	35	2	0.00540421	0.160557	96.7437	0.0174329	0.0472432
7	2	9.95	150	926	931.9	928.95	2.6	0.8	27.6	0.061	55	213.14	35	2	0.00540421	0.160557	96.7437	0.0174329	0.0578773
8	2	9.95	150	926	931.9	928.95	2.6	0.8	27.6	0.061	55	213.14	35	2	0.00540421	0.160557	96.7437	0.0174329	0.0803658
9	2	9.95	150	926	931.9	928.95	2.6	0.8	27.6	0.061	55	213.14	35	2	0.00540421	0.160557	96.7437	0.0174329	0.0364348
10	2	9.95	150	926	931.9	928.95	2.6	0.8	27.6	0.061	55	213.14	35	2	0.00540421	0.160557	96.7437	0.0174329	0.0521245
11	2	9.95	150	926	931.9	928.95	2.6	0.8	27.6	0.061	55	213.14	35	2	0.00540421	0.160557	96.7437	0.0174329	0.043931
12	2	9.95	150	926	931.9	928.95	2.6	0.8	27.6	0.061	55	213.14	35	2	0.00540421	0.160557	96.7437	0.0174329	0.042362
1	2	9.33	125	930.4	938	934.2	5.4	3.7	26.8	0.312	22	170.69	29	2	0.255358	1.93767	88.3559	0.0762262	0.442874
2	2	9.33	125	930.4	938	934.2	5.4	3.7	26.8	0.312	22	170.69	29	2	0.255358	1.93767	88.3559	0.0762262	0.489372
3	2	9.33	125	930.4	938	934.2	5.4	3.7	26.8	0.312	22	170.69	29	2	0.255358	1.93767	88.3559	0.0762262	0.482512
4	2	9.33	125	930.4	938	934.2	5.4	3.7	26.8	0.312	22	170.69	29	2	0.255358	1.93767	88.3559	0.0762262	0.450497
5	2	9.33	125	930.4	938	934.2	5.4	3.7	26.8	0.312	22	170.69	29	2	0.255358	1.93767	88.3559	0.0762262	0.55264
6	2	9.33	125	930.4	938	934.2	5.4	3.7	26.8	0.312	22	170.69	29	2	0.255358	1.93767	88.3559	0.0762262	0.523674
7	2	9.33	125	930.4	938	934.2	5.4	3.7	26.8	0.312	22	170.69	29	2	0.255358	1.93767	88.3559	0.0762262	0.635726
8	2	9.33	125	930.4	938	934.2	5.4	3.7	26.8	0.312	22	170.69	29	2	0.255358	1.93767	88.3559	0.0762262	0.70433
3	2	9.33	125	960.4	966.3	963.35	3.3	0.3	26.8	0.128	25	177.81	29	2	0.00849423	0.0644547	88.3559	0.00253559	0.0147318
5	2	9.33	125	960.4	966.3	963.35	3.3	0.3	26.8	0.128	25	177.81	29	2	0.00849423	0.0644547	88.3559	0.00253559	0.0162785
6	2	9.33	125	960.4	966.3	963.35	3.3	0.3	26.8	0.128	25	177.81	29	2	0.00849423	0.0644547	88.3559	0.00253559	0.0160503
7	2	9.33	125	960.4	966.3	963.35	3.3	0.3	26.8	0.128	25	177.81	29	2	0.00849423	0.0644547	88.3559	0.00253559	0.0149853
8	2	9.33	125	960.4	966.3	963.35	3.3	0.3	26.8	0.128	25	177.81	29	2	0.00849423	0.0644547	88.3559	0.00253559	0.018383
9	2	9.33	125	960.4	966.3	963.35	3.3	0.3	26.8	0.128	25	177.81	29	2	0.00849423	0.0644547	88.3559	0.00253559	0.0174195
10	2	9.33	125	960.4	966.3	963.35	3.3	0.3	26.8	0.128	25	177.81	29	2	0.00849423	0.0644547	88.3559	0.00253559	0.0211468
11	2	9.33	125	960.4	966.3	963.35	3.3	0.3	26.8	0.128	25	177.81	29	2	0.00849423	0.0644547	88.3559	0.00253559	0.0234289
1	2	10	125	952.6	958.7	955.65	2.7	0.4	26.4	0.113	27	176.36	29	2	0.0363207	0.110765	75.3065	0.00858646	0.0315123
2	2	10	125	952.6	958.7	955.65	2.7	0.4	26.4	0.113	27	176.36	29	2	0.0363207	0.110765	75.3065	0.00858646	0.0308254
3	2	10	125	952.6	958.7	955.65	2.7	0.4	26.4	0.113	27	176.36	29	2	0.0363207	0.110765	75.3065	0.00858646	0.0358056
4	2	10	125	952.6	958.7	955.65	2.7	0.4	26.4	0.113	27	176.36	29	2	0.0363207	0.110765	75.3065	0.00858646	0.0479125
5	2	10	125	952.6	958.7	955.65	2.7	0.4	26.4	0.113	27	176.36	29	2	0.0363207	0.110765	75.3065	0.00858646	0.0518622
6	2	10	125	952.6	958.7	955.65	2.7	0.4	26.4	0.113	27	176.36	29	2	0.0363207	0.110765	75.3065	0.00858646	0.0417302
7	2	10	125	952.6	958.7	955.65	2.7	0.4	26.4	0.113	27	176.36	29	2	0.0363207	0.110765	75.3065	0.00858646	0.0388108
8	2	10	125	952.6	958.7	955.65	2.7	0.4	26.4	0.113	27	176.36	29	2	0.0363207	0.110765	75.3065	0.00858646	0.0500591
9	2	10	125	952.6	958.7	955.65	2.7	0.4	26.4	0.113	27	176.36	29	2	0.0363207	0.110765	75.3065	0.00858646	0.0519481
10	2	10	125	952.6	958.7	955.65	2.7	0.4	26.4	0.113	27	176.36	29	2	0.0363207	0.110765	75.3065	0.00858646	0.0511753
11	2	10	125	952.6	958.7	955.65	2.7	0.4	26.4	0.113	27	176.36	29	2	0.0363207	0.110765	75.3065	0.00858646	0.0248149
12	2	10	125	952.6	958.7	955.65	2.7	0.4	26.4	0.113	27	176.36	29	2	0.0363207	0.110765	75.3065	0.00858646	0.0230117
1	2	10	125	965.8	972	968.9	3.1	1.7	29.1	0.432	26	152.34	25	2	0.590132	1.79969	75.3065	0.139511	0.512005
2	2	10	125	965.8	972	968.9	3.1	1.7	29.1	0.432	26	152.34	25	2	0.590132	1.79969	75.3065	0.139511	0.500845
3	2	10	125	965.8	972	968.9	3.1	1.7	29.1	0.432	26	152.34	25	2	0.590132	1.79969	75.3065	0.139511	0.581761
4	2	10	125	965.8	972	968.9	3.1	1.7	29.1	0.432	26	152.34	25	2	0.590132	1.79969	75.3065	0.139511	0.778472
5	2	10	125	965.8	972	968.9	3.1	1.7	29.1	0.432	26	152.34	25	2	0.590132	1.79969	75.3065	0.139511	0.842647
6	2	10	125	965.8	972	968.9	3.1	1.7	29.1	0.432	26	152.34	25	2	0.590132	1.79969	75.3065	0.139511	0.678024
7	2	10	125	965.8	972	968.9	3.1	1.7	29.1	0.432	26	152.34	25	2	0.590132	1.79969	75.3065	0.139511	0.63059
8	2	10	125	965.8	972	968.9	3.1	1.7	29.1	0.432	26	152.34	25	2	0.590132	1.79969	75.3065	0.139511	0.813349
9	2	10	125	965.8	972	968.9	3.1	1.7	29.1	0.432	26	152.34	25	2	0.590132	1.79969	75.3065	0.139511	0.844042
10	2	10	125	965.8	972	968.9	3.1	1.7	29.1	0.432	26	152.34	25	2	0.590132	1.79969	75.3065	0.139511	0.831486
11	2	10	125	965.8	972	968.9	3.1	1.7	29.1	0.432	26	152.34	25	2	0.590132	1.79969	75.3065	0.139511	0.403187
12	2	10	125	965.8	972	968.9	3.1	1.7	29.1	0.432	26	152.34	25	2	0.590132	1.79969	75.3065	0.139511	0.37389
1	2	9.97	175	981.3	987.4	984.35	4.6	1.7	30.5	0.707	34	224.02	37	2	0.567218	6.22845	91.6532	0.182385	0.238925
2	2	9.97	175	981.3	987.4	984.35	4.6	1.7	30.5	0.707	34	224.02	37	2	0.567218	6.22845	91.6532	0.182385	0.525269
3	2	9.97	175	981.3	987.4	984.35	4.6	1.7	30.5	0.707	34	224.02	37	2	0.567218	6.22845	91.6532	0.182385	0.443196
4	2	9.97	175	981.3	987.4	984.35	4.6	1.7	30.5	0.707	34	224.02	37	2	0.567218	6.22845	91.6532	0.182385	0.441372
5	2	9.97	175	981.3	987.4	984.35	4.6	1.7	30.5	0.707	34	224.02	37	2	0.567218	6.22845	91.6532	0.182385	0.237101
6	2	9.97	175	981.3	987.4	984.35	4.6	1.7	30.5	0.707	34	224.02	37	2	0.567218	6.22845	91.6532	0.182385	0.266282
7	2	9.97	175	981.3	987.4	984.35	4.6	1.7	30.5	0.707	34	224.02	37	2	0.567218	6.22845	91.6532	0.182385	0.1988
8	2	9.97	175	981.3	987.4	984.35	4.6	1.7	30.5	0.707	34	224.02	37	2	0.567218	6.22845	91.6532	0.182385	0.100312
1	2	9.97	175	996.2	1002.8	999.5	5.5	3.9	31.7	0.61	38	142	23	2	1.12273	12.3284	91.6532	0.361007	0.472919
2	2	9.97	175	996.2	1002.8	999.5	5.5	3.9	31.7	0.61	38	142	23	2	1.12273	12.3284	91.6532	0.361007	1.0397
3	2	9.97	175	996.2	1002.8	999.5	5.5	3.9	31.7	0.61	38	142	23	2	1.12273	12.3284	91.6532	0.361007	0.877247
4	2	9.97	175	996.2	1002.8	999.5	5.5	3.9	31.7	0.61	38	142	23	2	1.12273	12.3284	91.6532	0.361007	0.873637
5	2	9.97	175	996.2	1002.8	999.5	5.5	3.9	31.7	0.61	38	142	23	2	1.12273	12.3284	91.6532	0.361007	0.469309
6	2	9.97	175	996.2	1002.8	999.5	5.5	3.9	31.7	0.61	38	142	23	2	1.12273	12.3284	91.6532	0.361007	0.52707
7	2	9.97	175	996.2	1002.8	999.5	5.5	3.9	31.7	0.61	38	142	23	2	1.12273	12.3284	91.6532	0.361007	0.393498
8	2	9.97	175	996.2	1002.8	999.5	5.5	3.9	31.7	0.61	38	142	23	2	1.12273	12.3284	91.6532	0.361007	0.198554
1	2	9.65	175	954	961.6	957.8	6.6	3.3	29.1	0.611	27	178.35	29	2	0.336421	7.49023	95.7016	0.278034	0.325299
2	2	9.65	175	954	961.6	957.8	6.6	3.3	29.1	0.611	27	178.35	29	2	0.336421	7.49023	95.7016	0.278034	0.264132
3	2	9.65	175	954	961.6	957.8	6.6	3.3	29.1	0.611	27	178.35	29	2	0.336421	7.49023	95.7016	0.278034	0.49768
4	2	9.65	175	954	961.6	957.8	6.6	3.3	29.1	0.611	27	178.35	29	2	0.336421	7.49023	95.7016	0.278034	0.375345
5	2	9.65	175	954	961.6	957.8	6.6	3.3	29.1	0.611	27	178.35	29	2	0.336421	7.49023	95.7016	0.278034	0.483779
6	2	9.65	175	954	961.6	957.8	6.6	3.3	29.1	0.611	27	178.35	29	2	0.336421	7.49023	95.7016	0.278034	0.314178
7	2	9.65	175	954	961.6	957.8	6.6	3.3	29.1	0.611	27	178.35	29	2	0.336421	7.49023	95.7016	0.278034	0.458756
8	2	9.65	175	954	961.6	957.8	6.6	3.3	29.1	0.611	27	178.35	29	2	0.336421	7.49023	95.7016	0.278034	0.653379
9	2	9.65	175	954	961.6	957.8	6.6	3.3	29.1	0.611	27	178.35	29	2	0.336421	7.49023	95.7016	0.278034	0.764593
10	2	9.65	175	954	961.6	957.8	6.6	3.3	29.1	0.611	27	178.35	29	2	0.336421	7.49023	95.7016	0.278034	0.678402
11	2	9.65	175	954	961.6	957.8	6.6	3.3	29.1	0.611	27	178.35	29	2	0.336421	7.49023	95.7016	0.278034	0.764593
12	2	9.65	175	954	961.6	957.8	6.6	3.3	29.1	0.611	27	178.35	29	2	0.336421	7.49023	95.7016	0.278034	0.892488
1	2	10.05	125	969.5	978.2	973.85	3.7	2.2	30.9	0.411	34	176.88	29	2	0.804868	53.9785	98.5308	0.654364	1.17785
2	2	10.05	125	969.5	978.2	973.85	3.7	2.2	30.9	0.411	34	176.88	29	2	0.804868	53.9785	98.5308	0.654364	1.49849
3	2	10.05	125	969.5	978.2	973.85	3.7	2.2	30.9	0.411	34	176.88	29	2	0.804868	53.9785	98.5308	0.654364	2.75487
4	2	10.05	125	969.5	978.2	973.85	3.7	2.2	30.9	0.411	34	176.88	29	2	0.804868	53.9785	98.5308	0.654364	3.03625
5	2	10.05	125	969.5	978.2	973.85	3.7	2.2	30.9	0.411	34	176.88	29	2	0.804868	53.9785	98.5308	0.654364	1.649
6	2	10.05	125	969.5	978.2	973.85	3.7	2.2	30.9	0.411	34	176.88	29	2	0.804868	53.9785	98.5308	0.654364	1.66208
7	2	10.05	125	969.5	978.2	973.85	3.7	2.2	30.9	0.411	34	176.88	29	2	0.804868	53.9785	98.5308	0.654364	0.700169
8	2	10.05	125	969.5	978.2	973.85	3.7	2.2	30.9	0.411	34	176.88	29	2	0.804868	53.9785	98.5308	0.654364	1.649
9	2	10.05	125	969.5	978.2	973.85	3.7	2.2	30.9	0.411	34	176.88	29	2	0.804868	53.9785	98.5308	0.654364	0.86376
10	2	10.05	125	969.5	978.2	973.85	3.7	2.2	30.9	0.411	34	176.88	29	2	0.804868	53.9785	98.5308	0.654364	1.64245
1	2	11.09	150	1065.8	1071.5	1068.65	4.5	2.4	29.6	0.434	35	177.8	29	2	0.430289	12.0481	96.5517	0.500336	1.6361
2	2	11.09	150	1065.8	1071.5	1068.65	4.5	2.4	29.6	0.434	35	177.8	29	2	0.430289	12.0481	96.5517	0.500336	1.37092
3	2	11.09	150	1065.8	1071.5	1068.65	4.5	2.4	29.6	0.434	35	177.8	29	2	0.430289	12.0481	96.5517	0.500336	0.680457
4	2	11.09	150	1065.8	1071.5	1068.65	4.5	2.4	29.6	0.434	35	177.8	29	2	0.430289	12.0481	96.5517	0.500336	0.475319
5	2	11.09	150	1065.8	1071.5	1068.65	4.5	2.4	29.6	0.434	35	177.8	29	2	0.430289	12.0481	96.5517	0.500336	0.670451
6	2	11.09	150	1065.8	1071.5	1068.65	4.5	2.4	29.6	0.434	35	177.8	29	2	0.430289	12.0481	96.5517	0.500336	0.495333
7	2	11.09	150	1065.8	1071.5	1068.65	4.5	2.4	29.6	0.434	35	177.8	29	2	0.430289	12.0481	96.5517	0.500336	0.315212
8	2	11.09	150	1065.8	1071.5	1068.65	4.5	2.4	29.6	0.434	35	177.8	29	2	0.430289	12.0481	96.5517	0.500336	0.320215
1	2	9.52	175	931.7	937.3	934.5	4.9	3.2	31.7	0.77	28	280.58	47	2	1.61655	11.7284	87.8864	0.335384	1.27781
2	2	9.52	175	931.7	937.3	934.5	4.9	3.2	31.7	0.77	28	280.58	47	2	1.61655	11.7284	87.8864	0.335384	0.610399
3	2	9.52	175	931.7	937.3	934.5	4.9	3.2	31.7	0.77	28	280.58	47	2	1.61655	11.7284	87.8864	0.335384	0.181107
4	2	9.52	175	931.7	937.3	934.5	4.9	3.2	31.7	0.77	28	280.58	47	2	1.61655	11.7284	87.8864	0.335384	0.298492
1	2	9.52	175	948.2	956.2	952.2	7.2	5.2	30.8	0.939	25	280.58	47	2	3.20345	23.2416	87.8864	0.664616	2.53219
2	2	9.52	175	948.2	956.2	952.2	7.2	5.2	30.8	0.939	25	280.58	47	2	3.20345	23.2416	87.8864	0.664616	1.2096
3	2	9.52	175	948.2	956.2	952.2	7.2	5.2	30.8	0.939	25	280.58	47	2	3.20345	23.2416	87.8864	0.664616	0.358893
4	2	9.52	175	948.2	956.2	952.2	7.2	5.2	30.8	0.939	25	280.58	47	2	3.20345	23.2416	87.8864	0.664616	0.591508
1	2	9.77	150	1056.3	1065.5	1060.9	6.4	3.2	30.8	0.434	31	142.54	23	2	0.0933459	7.11296	98.7047	0.933459	0.588079
2	2	9.77	150	1056.3	1065.5	1060.9	6.4	3.2	30.8	0.434	31	142.54	23	2	0.0933459	7.11296	98.7047	0.933459	0.438726
3	2	9.77	150	1056.3	1065.5	1060.9	6.4	3.2	30.8	0.434	31	142.54	23	2	0.0933459	7.11296	98.7047	0.933459	0.476064
4	2	9.77	150	1056.3	1065.5	1060.9	6.4	3.2	30.8	0.434	31	142.54	23	2	0.0933459	7.11296	98.7047	0.933459	0.728098
5	2	9.77	150	1056.3	1065.5	1060.9	6.4	3.2	30.8	0.434	31	142.54	23	2	0.0933459	7.11296	98.7047	0.933459	0.840113
6	2	9.77	150	1056.3	1065.5	1060.9	6.4	3.2	30.8	0.434	31	142.54	23	2	0.0933459	7.11296	98.7047	0.933459	0.606748
7	2	9.77	150	1056.3	1065.5	1060.9	6.4	3.2	30.8	0.434	31	142.54	23	2	0.0933459	7.11296	98.7047	0.933459	0.130684
8	2	9.77	150	1056.3	1065.5	1060.9	6.4	3.2	30.8	0.434	31	142.54	23	2	0.0933459	7.11296	98.7047	0.933459	0.140019
9	2	9.77	150	1056.3	1065.5	1060.9	6.4	3.2	30.8	0.434	31	142.54	23	2	0.0933459	7.11296	98.7047	0.933459	0.0653421
10	2	9.77	150	1056.3	1065.5	1060.9	6.4	3.2	30.8	0.434	31	142.54	23	2	0.0933459	7.11296	98.7047	0.933459	0.140019
1	2	9.13	150	998.7	1005.2	1001.95	5.6	1.2	29.2	0.609	33	281.7	47	2	0.338189	4.43922	92.9211	0.388723	0.202136
2	2	9.13	150	998.7	1005.2	1001.95	5.6	1.2	29.2	0.609	33	281.7	47	2	0.338189	4.43922	92.9211	0.388723	0.0583085
1	2	12.57	150	1110	1121.4	1115.7	3.8	2.5	29.4	0.345	35	168.48	27	2	0.161004	11.3696	98.6037	0.342561	0.548098
2	2	12.57	150	1110	1121.4	1115.7	3.8	2.5	29.4	0.345	35	168.48	27	2	0.161004	11.3696	98.6037	0.342561	0.558374
3	2	12.57	150	1110	1121.4	1115.7	3.8	2.5	29.4	0.345	35	168.48	27	2	0.161004	11.3696	98.6037	0.342561	0.45218
4	2	12.57	150	1110	1121.4	1115.7	3.8	2.5	29.4	0.345	35	168.48	27	2	0.161004	11.3696	98.6037	0.342561	0.424776
5	2	12.57	150	1110	1121.4	1115.7	3.8	2.5	29.4	0.345	35	168.48	27	2	0.161004	11.3696	98.6037	0.342561	0.359689
6	2	12.57	150	1110	1121.4	1115.7	3.8	2.5	29.4	0.345	35	168.48	27	2	0.161004	11.3696	98.6037	0.342561	0.469309
7	2	12.57	150	1110	1121.4	1115.7	3.8	2.5	29.4	0.345	35	168.48	27	2	0.161004	11.3696	98.6037	0.342561	0.459032
8	2	12.57	150	1110	1121.4	1115.7	3.8	2.5	29.4	0.345	35	168.48	27	2	0.161004	11.3696	98.6037	0.342561	0.380243
9	2	12.57	150	1110	1121.4	1115.7	3.8	2.5	29.4	0.345	35	168.48	27	2	0.161004	11.3696	98.6037	0.342561	0.667994
10	2	12.57	150	1110	1121.4	1115.7	3.8	2.5	29.4	0.345	35	168.48	27	2	0.161004	11.3696	98.6037	0.342561	0.359689
11	2	12.57	150	1110	1121.4	1115.7	3.8	2.5	29.4	0.345	35	168.48	27	2	0.161004	11.3696	98.6037	0.342561	0.715952
12	2	12.57	150	1110	1121.4	1115.7	3.8	2.5	29.4	0.345	35	168.48	27	2	0.161004	11.3696	98.6037	0.342561	0.445329
1	2	12.57	150	1127.3	1135.9	1131.6	6.1	4.3	29.3	0.383	35	181.08	29	2	0.307428	21.7097	98.6037	0.654103	1.04656
2	2	12.57	150	1127.3	1135.9	1131.6	6.1	4.3	29.3	0.383	35	181.08	29	2	0.307428	21.7097	98.6037	0.654103	1.06619
3	2	12.57	150	1127.3	1135.9	1131.6	6.1	4.3	29.3	0.383	35	181.08	29	2	0.307428	21.7097	98.6037	0.654103	0.863416
4	2	12.57	150	1127.3	1135.9	1131.6	6.1	4.3	29.3	0.383	35	181.08	29	2	0.307428	21.7097	98.6037	0.654103	0.811087
5	2	12.57	150	1127.3	1135.9	1131.6	6.1	4.3	29.3	0.383	35	181.08	29	2	0.307428	21.7097	98.6037	0.654103	0.686808
6	2	12.57	150	1127.3	1135.9	1131.6	6.1	4.3	29.3	0.383	35	181.08	29	2	0.307428	21.7097	98.6037	0.654103	0.896121
7	2	12.57	150	1127.3	1135.9	1131.6	6.1	4.3	29.3	0.383	35	181.08	29	2	0.307428	21.7097	98.6037	0.654103	0.876498
8	2	12.57	150	1127.3	1135.9	1131.6	6.1	4.3	29.3	0.383	35	181.08	29	2	0.307428	21.7097	98.6037	0.654103	0.726054
9	2	12.57	150	1127.3	1135.9	1131.6	6.1	4.3	29.3	0.383	35	181.08	29	2	0.307428	21.7097	98.6037	0.654103	1.2755
10	2	12.57	150	1127.3	1135.9	1131.6	6.1	4.3	29.3	0.383	35	181.08	29	2	0.307428	21.7097	98.6037	0.654103	0.686808
11	2	12.57	150	1127.3	1135.9	1131.6	6.1	4.3	29.3	0.383	35	181.08	29	2	0.307428	21.7097	98.6037	0.654103	1.36707
12	2	12.57	150	1127.3	1135.9	1131.6	6.1	4.3	29.3	0.383	35	181.08	29	2	0.307428	21.7097	98.6037	0.654103	0.850334
1	2	12.57	150	1138.1	1141.6	1139.85	0.8	0.2	25.2	0.042	38	145.52	23	2	0.00156804	0.11073	98.6037	0.00333625	0.00533799
2	2	12.57	150	1138.1	1141.6	1139.85	0.8	0.2	25.2	0.042	38	145.52	23	2	0.00156804	0.11073	98.6037	0.00333625	0.00543808
3	2	12.57	150	1138.1	1141.6	1139.85	0.8	0.2	25.2	0.042	38	145.52	23	2	0.00156804	0.11073	98.6037	0.00333625	0.00440384
4	2	12.57	150	1138.1	1141.6	1139.85	0.8	0.2	25.2	0.042	38	145.52	23	2	0.00156804	0.11073	98.6037	0.00333625	0.00413694
5	2	12.57	150	1138.1	1141.6	1139.85	0.8	0.2	25.2	0.042	38	145.52	23	2	0.00156804	0.11073	98.6037	0.00333625	0.00350306
6	2	12.57	150	1138.1	1141.6	1139.85	0.8	0.2	25.2	0.042	38	145.52	23	2	0.00156804	0.11073	98.6037	0.00333625	0.00457066
7	2	12.57	150	1138.1	1141.6	1139.85	0.8	0.2	25.2	0.042	38	145.52	23	2	0.00156804	0.11073	98.6037	0.00333625	0.00447057
8	2	12.57	150	1138.1	1141.6	1139.85	0.8	0.2	25.2	0.042	38	145.52	23	2	0.00156804	0.11073	98.6037	0.00333625	0.00370323
9	2	12.57	150	1138.1	1141.6	1139.85	0.8	0.2	25.2	0.042	38	145.52	23	2	0.00156804	0.11073	98.6037	0.00333625	0.00650568
10	2	12.57	150	1138.1	1141.6	1139.85	0.8	0.2	25.2	0.042	38	145.52	23	2	0.00156804	0.11073	98.6037	0.00333625	0.00350306
11	2	12.57	150	1138.1	1141.6	1139.85	0.8	0.2	25.2	0.042	38	145.52	23	2	0.00156804	0.11073	98.6037	0.00333625	0.00697275
12	2	12.57	150	1138.1	1141.6	1139.85	0.8	0.2	25.2	0.042	38	145.52	23	2	0.00156804	0.11073	98.6037	0.00333625	0.00433712
1	2	7.73	175	1001.3	1005.6	1003.45	3.2	1	31.1	0.493	44	725	101.5	2	0.117763	7.70845	98.4953	0.12528	0.554988
2	2	7.73	175	1001.3	1005.6	1003.45	3.2	1	31.1	0.493	44	725	101.5	2	0.117763	7.70845	98.4953	0.12528	0.453512
3	2	7.73	175	1001.3	1005.6	1003.45	3.2	1	31.1	0.493	44	725	101.5	2	0.117763	7.70845	98.4953	0.12528	0.557494
4	2	7.73	175	1001.3	1005.6	1003.45	3.2	1	31.1	0.493	44	725	101.5	2	0.117763	7.70845	98.4953	0.12528	0.507382
5	2	7.73	175	1001.3	1005.6	1003.45	3.2	1	31.1	0.493	44	725	101.5	2	0.117763	7.70845	98.4953	0.12528	0.655212
6	2	7.73	175	1001.3	1005.6	1003.45	3.2	1	31.1	0.493	44	725	101.5	2	0.117763	7.70845	98.4953	0.12528	0.706577
7	2	7.73	175	1001.3	1005.6	1003.45	3.2	1	31.1	0.493	44	725	101.5	2	0.117763	7.70845	98.4953	0.12528	0.697807
8	2	7.73	175	1001.3	1005.6	1003.45	3.2	1	31.1	0.493	44	725	101.5	2	0.117763	7.70845	98.4953	0.12528	0.665234
9	2	7.73	175	1001.3	1005.6	1003.45	3.2	1	31.1	0.493	44	725	101.5	2	0.117763	7.70845	98.4953	0.12528	0.598836
10	2	7.73	175	1001.3	1005.6	1003.45	3.2	1	31.1	0.493	44	725	101.5	2	0.117763	7.70845	98.4953	0.12528	0.290649
1	2	7.73	175	1006.6	1009.8	1008.2	2.4	0.4	27.8	0.165	42	725	103	2	0.0157654	1.03196	98.4953	0.0167717	0.0742986
2	2	7.73	175	1006.6	1009.8	1008.2	2.4	0.4	27.8	0.165	42	725	103	2	0.0157654	1.03196	98.4953	0.0167717	0.0607136
3	2	7.73	175	1006.6	1009.8	1008.2	2.4	0.4	27.8	0.165	42	725	103	2	0.0157654	1.03196	98.4953	0.0167717	0.0746341
4	2	7.73	175	1006.6	1009.8	1008.2	2.4	0.4	27.8	0.165	42	725	103	2	0.0157654	1.03196	98.4953	0.0167717	0.0679254
5	2	7.73	175	1006.6	1009.8	1008.2	2.4	0.4	27.8	0.165	42	725	103	2	0.0157654	1.03196	98.4953	0.0167717	0.087716
6	2	7.73	175	1006.6	1009.8	1008.2	2.4	0.4	27.8	0.165	42	725	103	2	0.0157654	1.03196	98.4953	0.0167717	0.0945924
7	2	7.73	175	1006.6	1009.8	1008.2	2.4	0.4	27.8	0.165	42	725	103	2	0.0157654	1.03196	98.4953	0.0167717	0.0934184
8	2	7.73	175	1006.6	1009.8	1008.2	2.4	0.4	27.8	0.165	42	725	103	2	0.0157654	1.03196	98.4953	0.0167717	0.0890577
9	2	7.73	175	1006.6	1009.8	1008.2	2.4	0.4	27.8	0.165	42	725	103	2	0.0157654	1.03196	98.4953	0.0167717	0.0801687
10	2	7.73	175	1006.6	1009.8	1008.2	2.4	0.4	27.8	0.165	42	725	103	2	0.0157654	1.03196	98.4953	0.0167717	0.0389103
1	2	9.28	125	999.6	1007	1003.3	6.6	2.8	29.4	0.284	26	202.36	33	2	0.386167	7.68989	95.2184	0.304069	0.313191
2	2	9.28	125	999.6	1007	1003.3	6.6	2.8	29.4	0.284	26	202.36	33	2	0.386167	7.68989	95.2184	0.304069	0.218929
3	2	9.28	125	999.6	1007	1003.3	6.6	2.8	29.4	0.284	26	202.36	33	2	0.386167	7.68989	95.2184	0.304069	0.291906
4	2	9.28	125	999.6	1007	1003.3	6.6	2.8	29.4	0.284	26	202.36	33	2	0.386167	7.68989	95.2184	0.304069	0.562527
5	2	9.28	125	999.6	1007	1003.3	6.6	2.8	29.4	0.284	26	202.36	33	2	0.386167	7.68989	95.2184	0.304069	0.459143
6	2	9.28	125	999.6	1007	1003.3	6.6	2.8	29.4	0.284	26	202.36	33	2	0.386167	7.68989	95.2184	0.304069	0.580771
7	2	9.28	125	999.6	1007	1003.3	6.6	2.8	29.4	0.284	26	202.36	33	2	0.386167	7.68989	95.2184	0.304069	0.681113
8	2	9.28	125	999.6	1007	1003.3	6.6	2.8	29.4	0.284	26	202.36	33	2	0.386167	7.68989	95.2184	0.304069	1.05208
9	2	9.28	125	999.6	1007	1003.3	6.6	2.8	29.4	0.284	26	202.36	33	2	0.386167	7.68989	95.2184	0.304069	1.14026
1	2	10.66	125	939.1	945.2	942.15	4.5	2.9	32.2	1.04	30	141.42	23	2	1.33136	24.3645	94.8188	0.625052	0.518793
2	2	10.66	125	939.1	945.2	942.15	4.5	2.9	32.2	1.04	30	141.42	23	2	1.33136	24.3645	94.8188	0.625052	0.975081
3	2	10.66	125	939.1	945.2	942.15	4.5	2.9	32.2	1.04	30	141.42	23	2	1.33136	24.3645	94.8188	0.625052	1.08134
4	2	10.66	125	939.1	945.2	942.15	4.5	2.9	32.2	1.04	30	141.42	23	2	1.33136	24.3645	94.8188	0.625052	1.14384
5	2	10.66	125	939.1	945.2	942.15	4.5	2.9	32.2	1.04	30	141.42	23	2	1.33136	24.3645	94.8188	0.625052	1.05009
6	2	10.66	125	939.1	945.2	942.15	4.5	2.9	32.2	1.04	30	141.42	23	2	1.33136	24.3645	94.8188	0.625052	0.825068
[truncated: 6,519 more rows]
